# Supplementary material for: Mono-N-protected amino acid ligands stabilize dimeric palladium(ii) complexes of importance to C–H functionalization
Source: PubMed Central journal article supplement — Chem Sci. 2017 Jun 16;8(8):5746–56. doi: 10.1039/c7sc01674c (PMC5859881; doi:10.1039/c7sc01674c), 2017-06-16

# NMR spectra Table of Contents

|                                                                                       |            |
|---------------------------------------------------------------------------------------|------------|
| table of contents .....                                                               | pp 1       |
| supporting NMRs of <b>4</b> [Pd(dmmba)(OAc)] <sub>2</sub> .....                       | pp 2-6     |
| NMRs of <b>5a</b> CF <sub>3</sub> -dmmba .....                                        | pp 7-14    |
| NMRs of <b>6a</b> [Pd( <i>o</i> -CF <sub>3</sub> -dmmba)(NAC-Gly)] <sub>2</sub> ..... | pp 15-22   |
| NMRs of <b>6b</b> [Pd( <i>o</i> -CF <sub>3</sub> -dmmba)(NAC-Ala)] <sub>2</sub> ..... | pp 23-38   |
| NMRs of <b>6c</b> [Pd( <i>o</i> -CF <sub>3</sub> -dmmba)(NAC-Leu)] <sub>2</sub> ..... | pp 38-53   |
| NMRs of <b>6d</b> [Pd( <i>o</i> -CF <sub>3</sub> -dmmba)(NAC-Ile)] <sub>2</sub> ..... | pp 54-70   |
| NMRs of <b>9</b> [Pd( <i>o</i> -CF <sub>3</sub> -dmmba)(OAc)] <sub>2</sub> .....      | pp 71-78   |
| Overlaid <sup>13</sup> C aromatic region of <b>9</b> and <b>6a-d</b> .....            | pp 79      |
| NMRs of <b>8</b> [Pd( <i>o</i> -CF <sub>3</sub> -dmmba)(Cl)] <sub>2</sub> .....       | pp 80-85   |
| NMRs of <b>7</b> Pd( <i>o</i> -CF <sub>3</sub> -dmmba)(acac) .....                    | pp 86-91   |
| NMRs of <b>5b</b> 2-Cl,6-CF <sub>3</sub> -dmmba .....                                 | pp 92-96   |
| NMRs of <b>5c</b> 2-Br,6-CF <sub>3</sub> -dmmba .....                                 | pp 97-100  |
| NMRs of <b>5d</b> 2-I,6-CF <sub>3</sub> -dmmba .....                                  | pp 101-105 |
| supporting NMRs of <b>2</b> [Pd(dmmba)(NAC-Gly)] <sub>2</sub> .....                   | pp 106-109 |

COSY  
4 [Pd(dmba)(OAc)]<sub>2</sub>

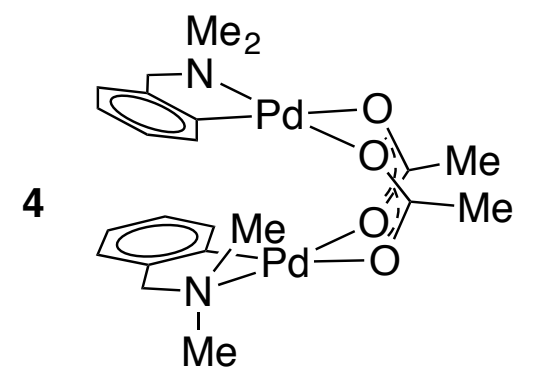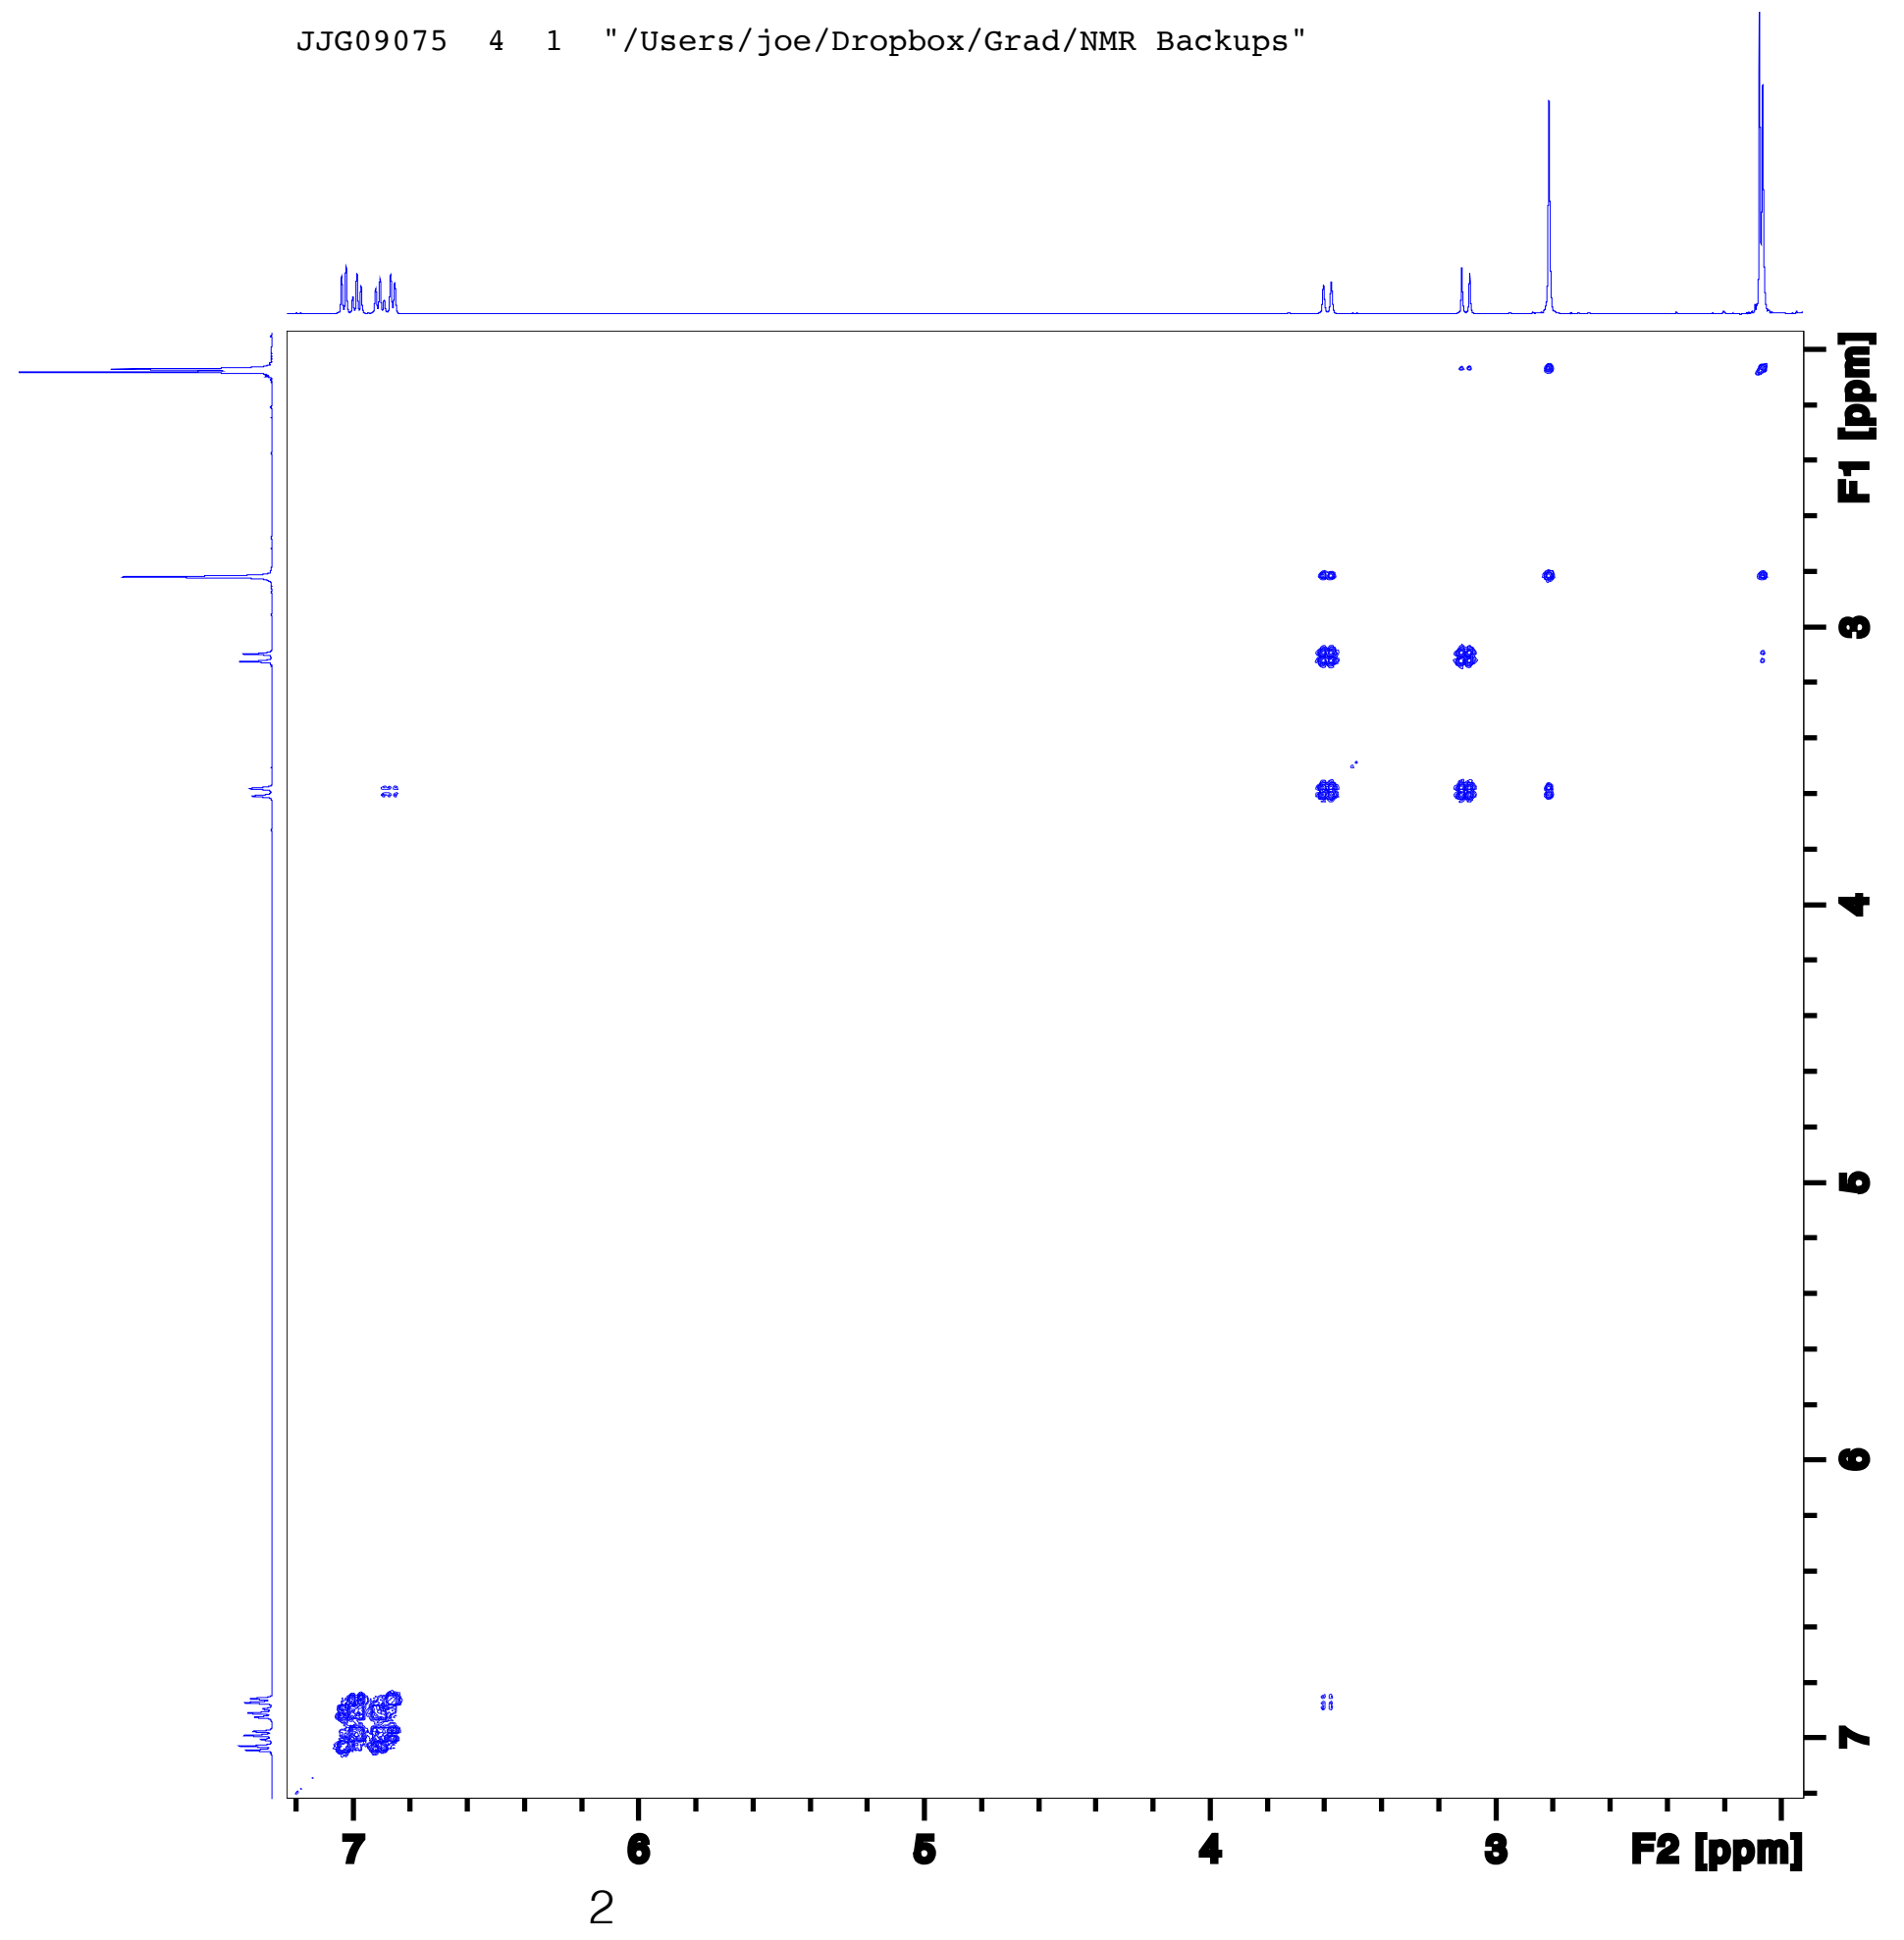

COSY aromatic region

4 [Pd(dmba)(OAc)]<sub>2</sub>

JJG09075 4 1 "/Users/joe/Dropbox/Grad/NMR Backups"

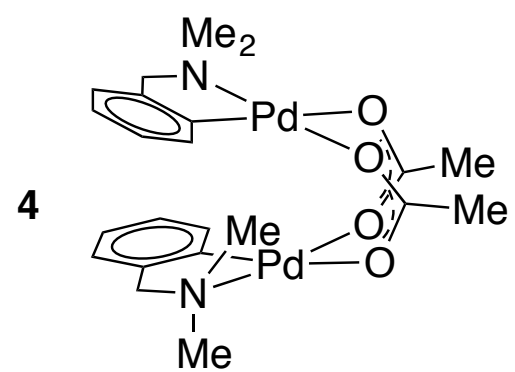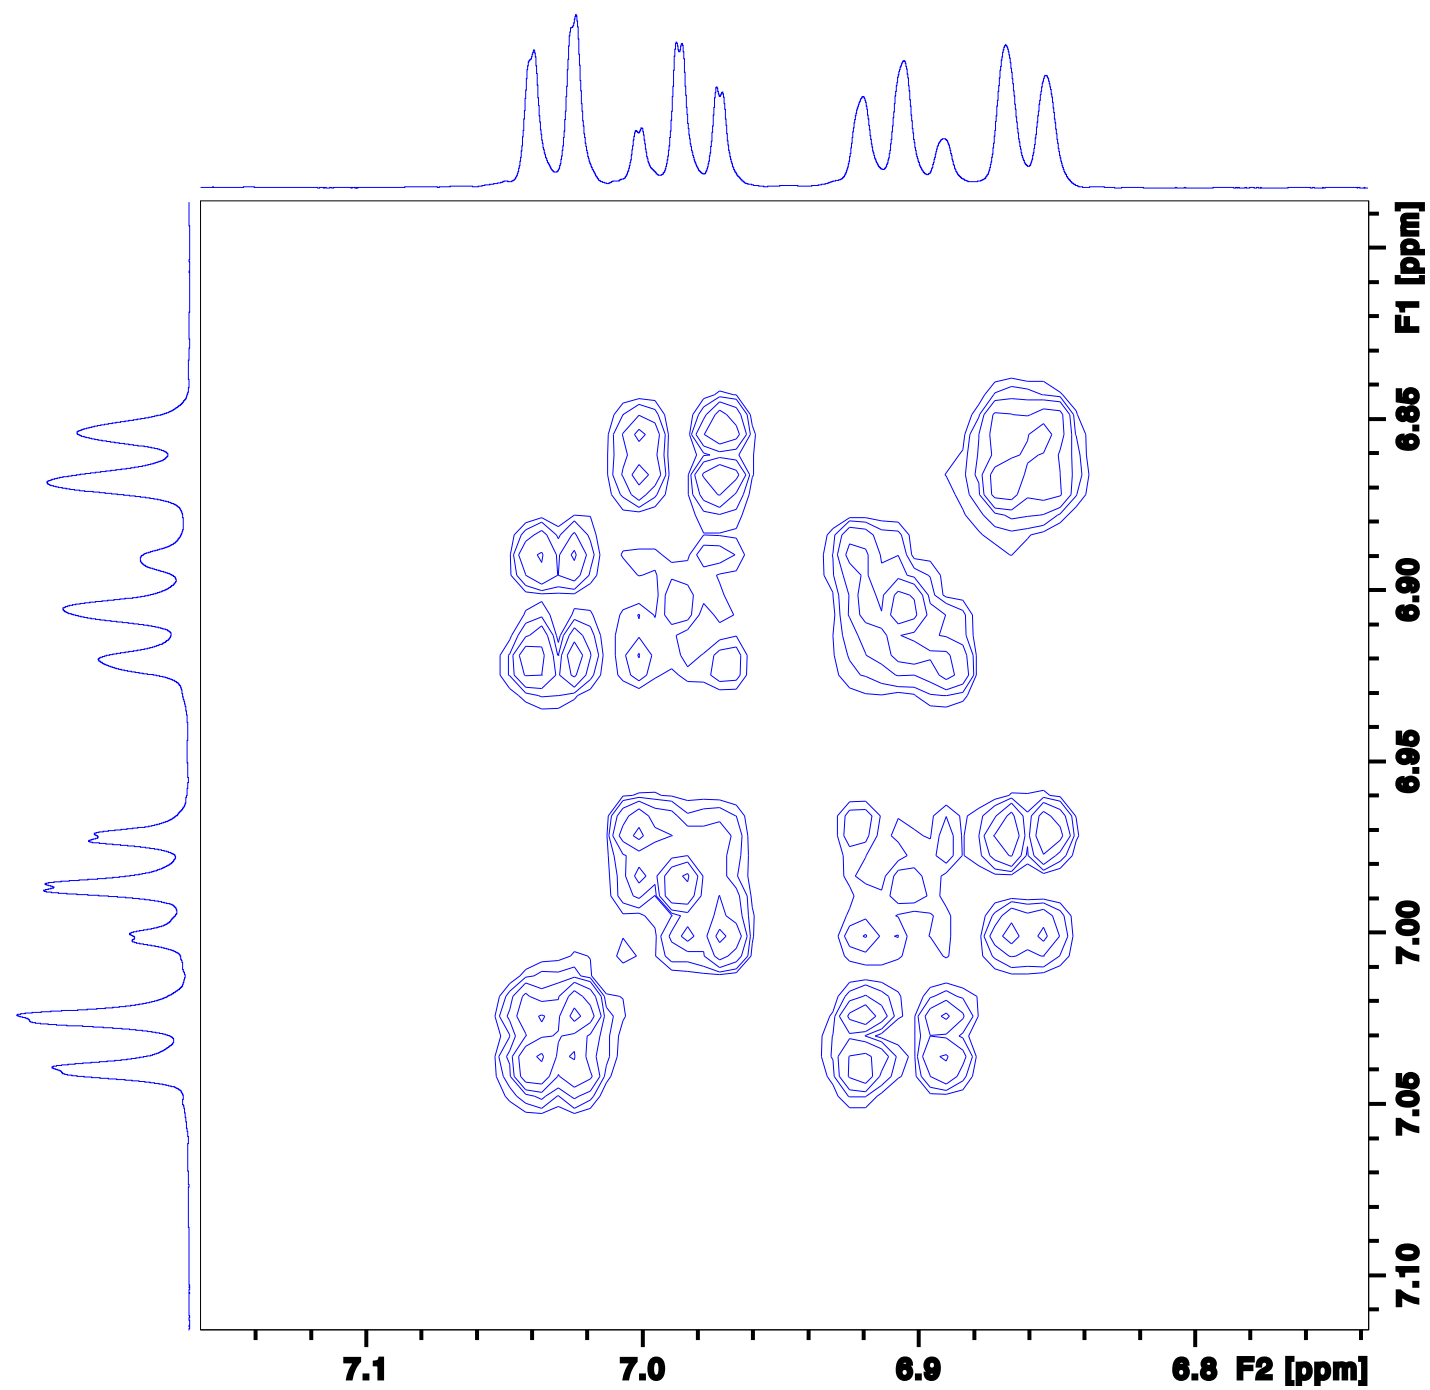

COSY aliphatic region

JJG09075 4 1 "/Users/joe/Dropbox/Grad/NMR Backups"

4 [Pd(dmba)(OAc)]<sub>2</sub>

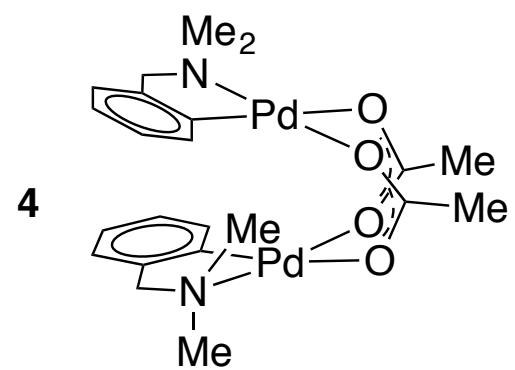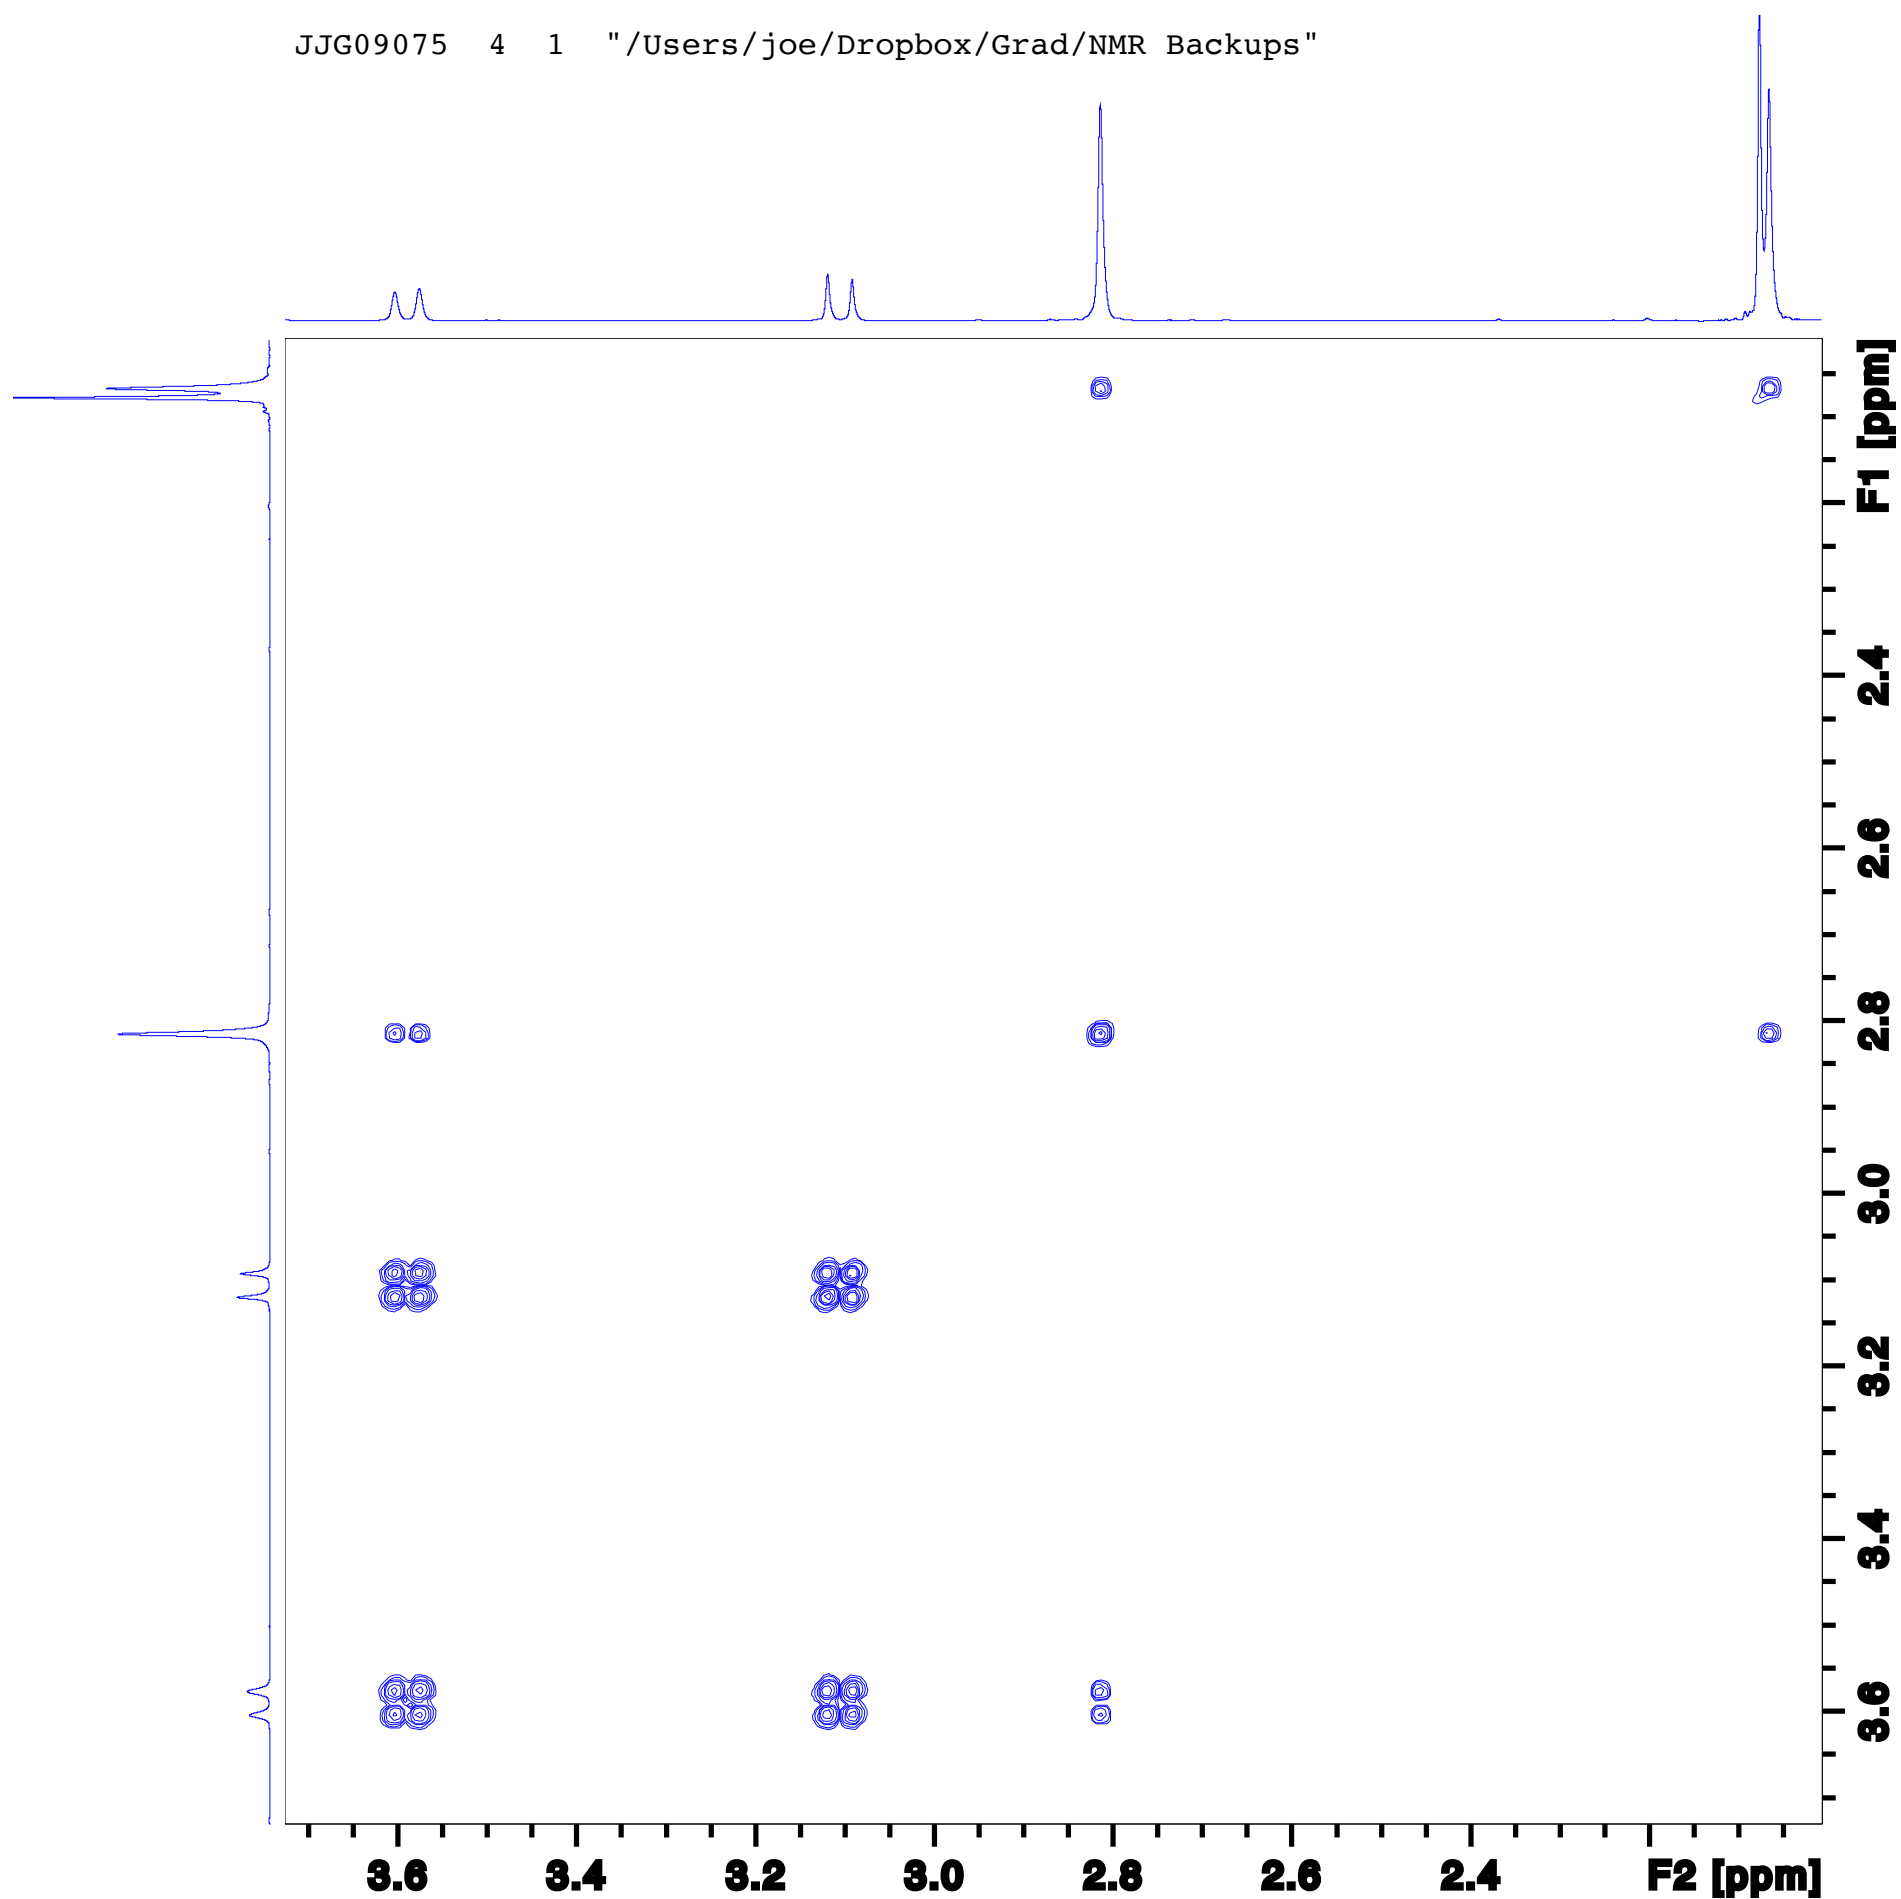



NOESY  
**4** [Pd(dmba)(OAc)]<sub>2</sub>

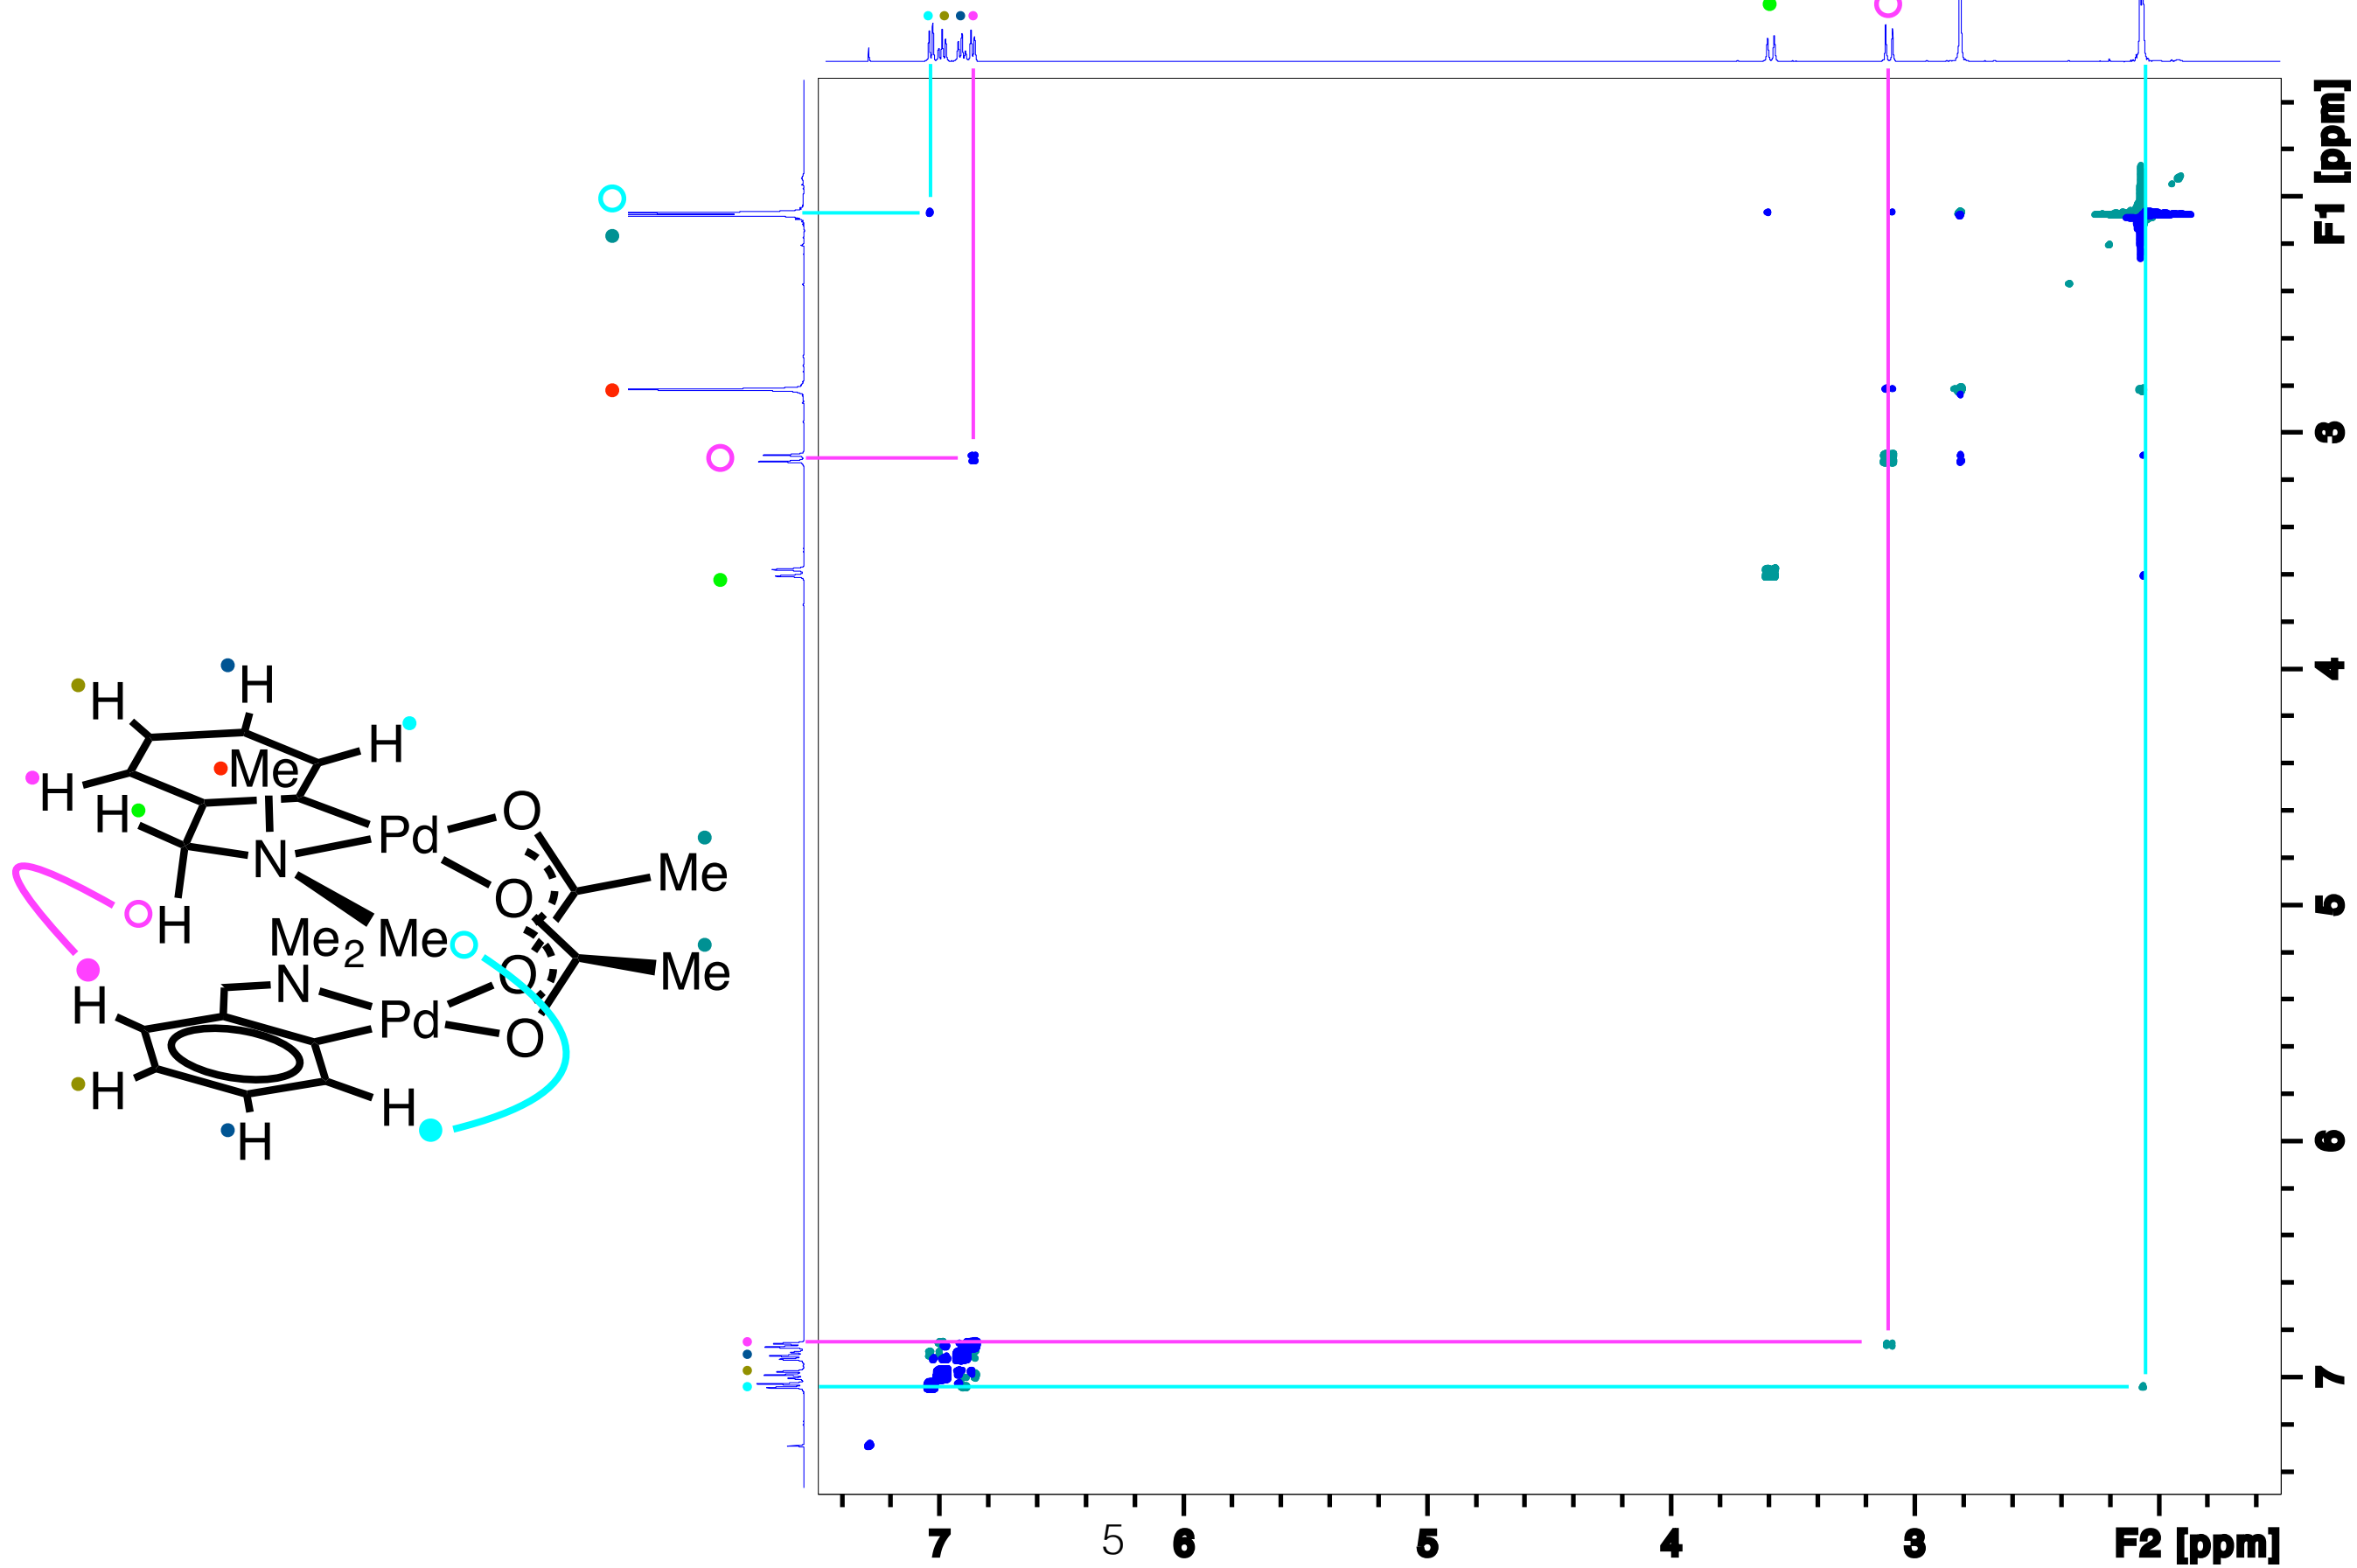

Key NOE cross peaks  
4 [Pd(dmba)(OAc)]<sub>2</sub>

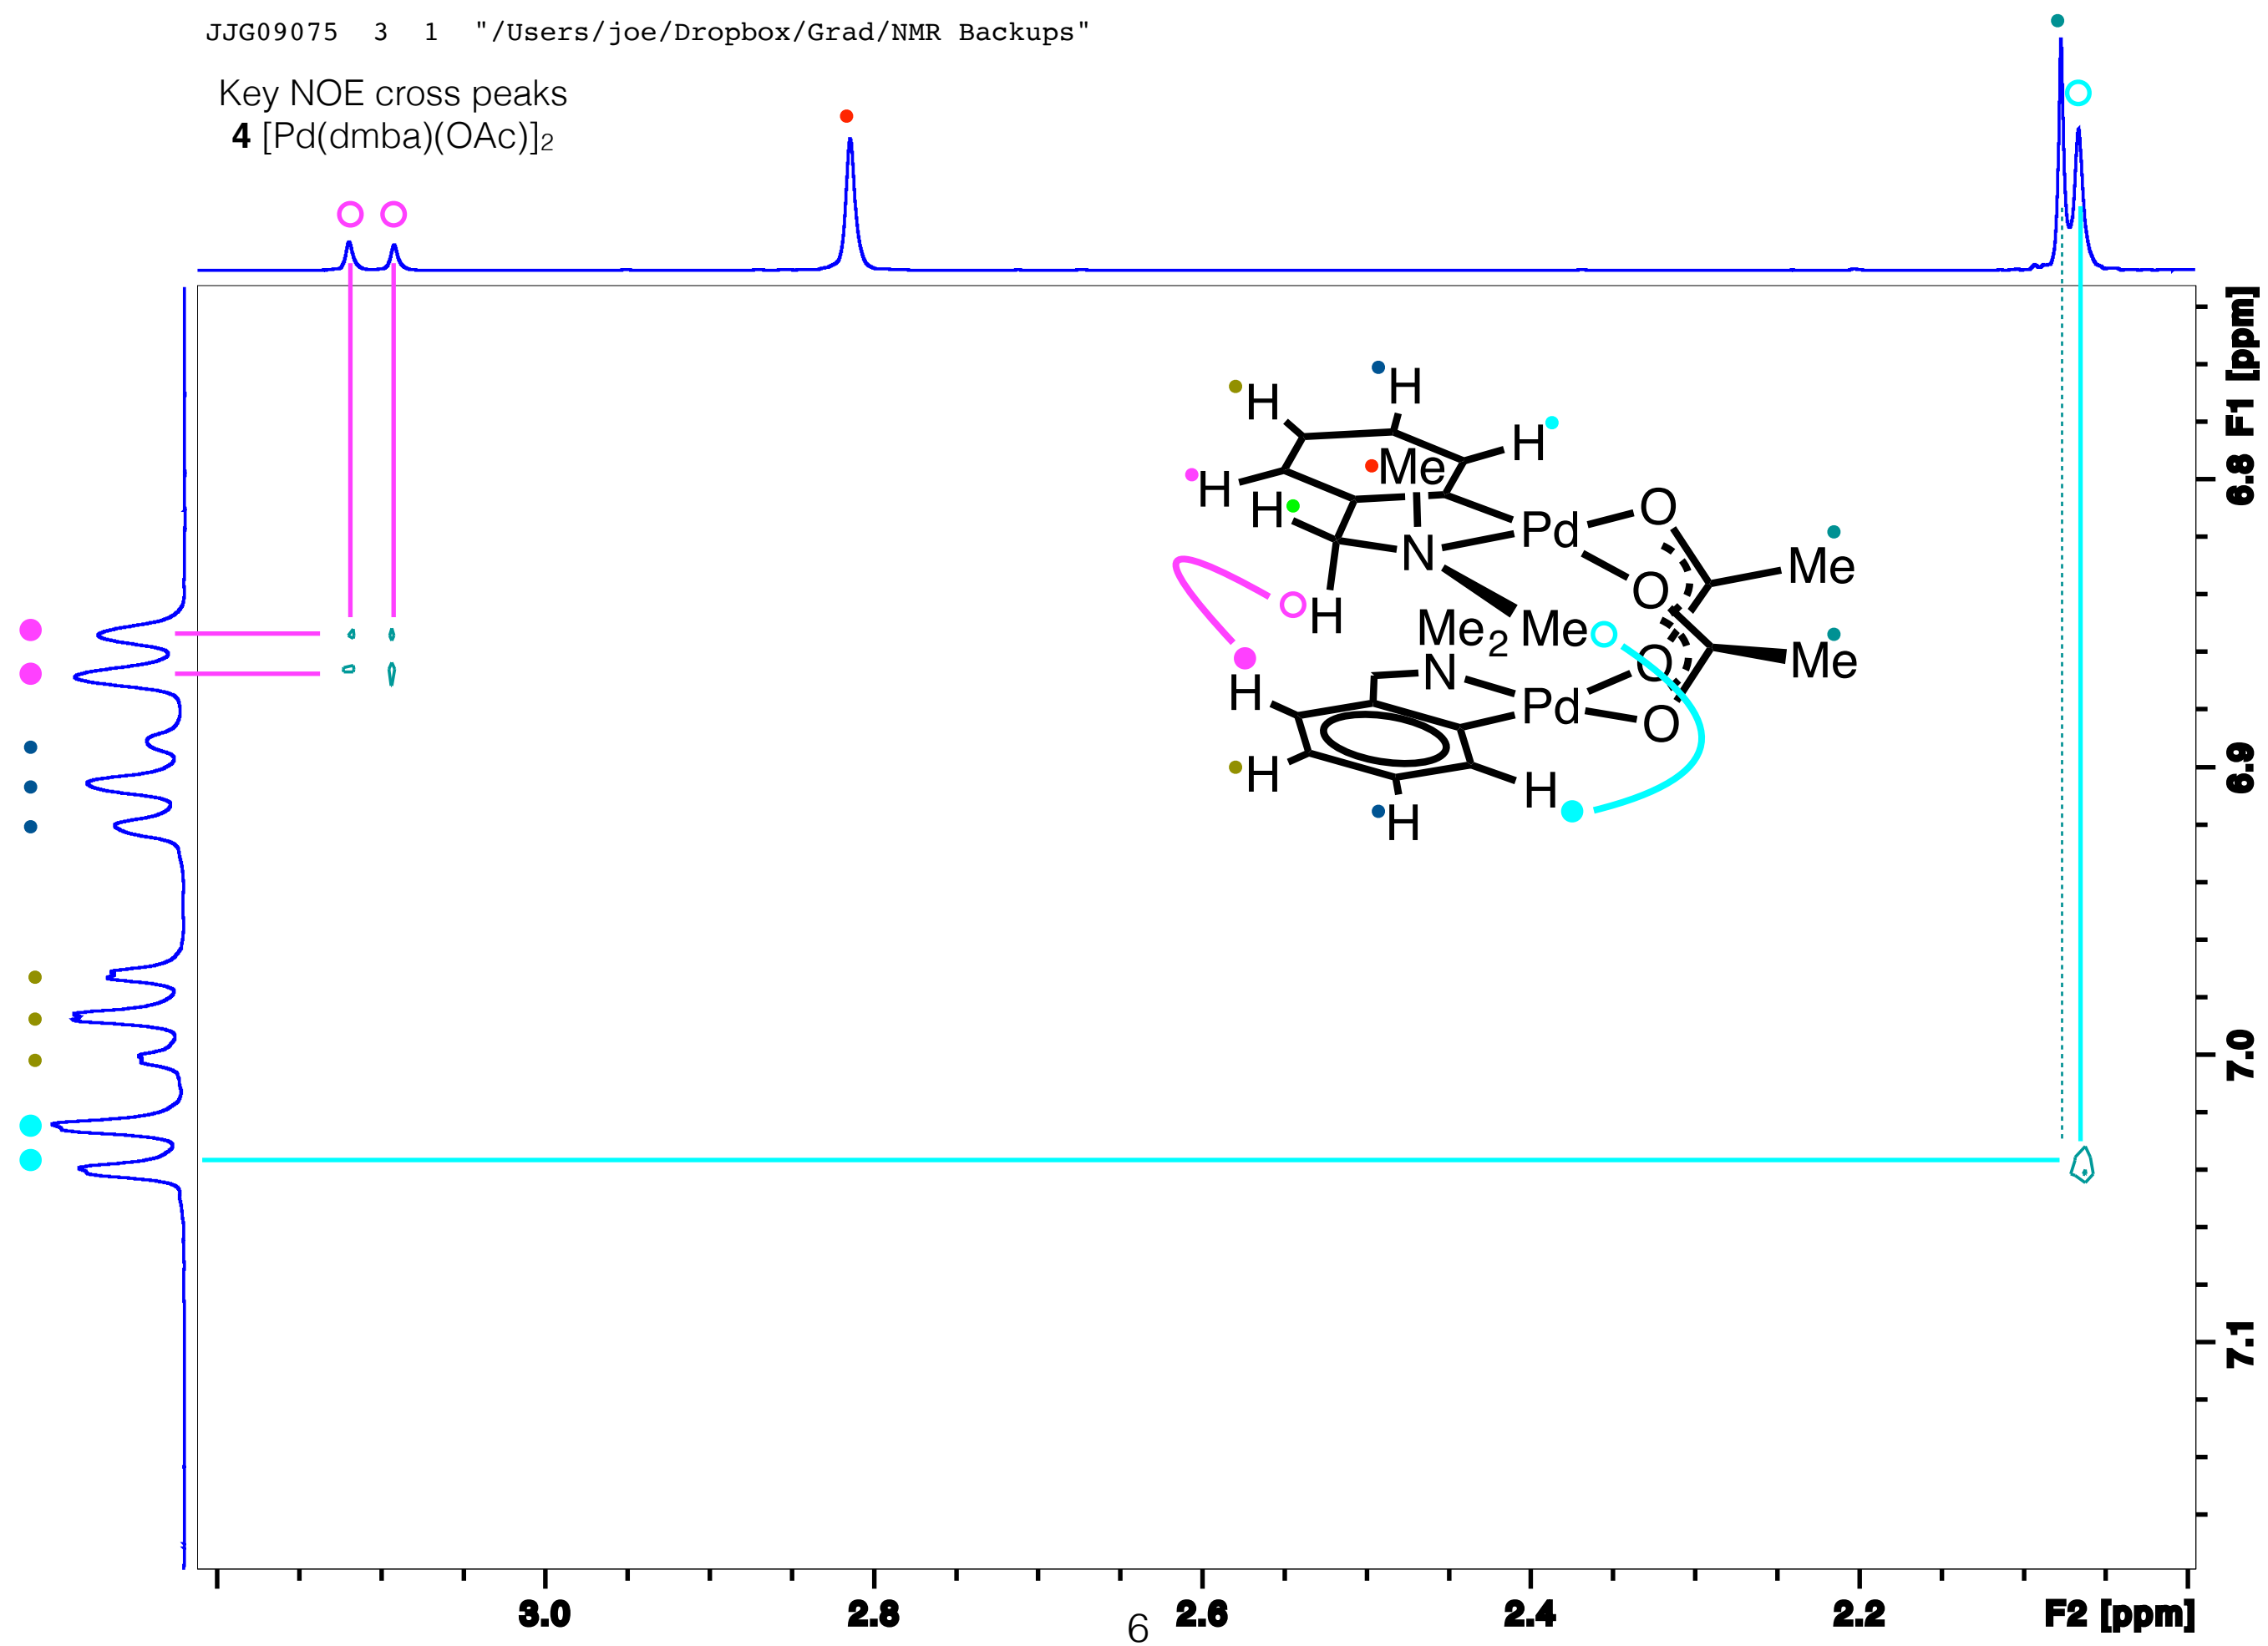

Current Data Parameters  
NAME JYG09080  
EXPNO 1  
PROCNO 1

<sup>1</sup>H NMR  
**5a**

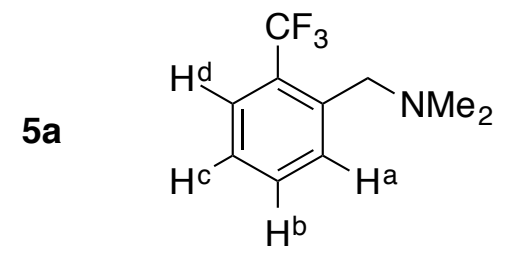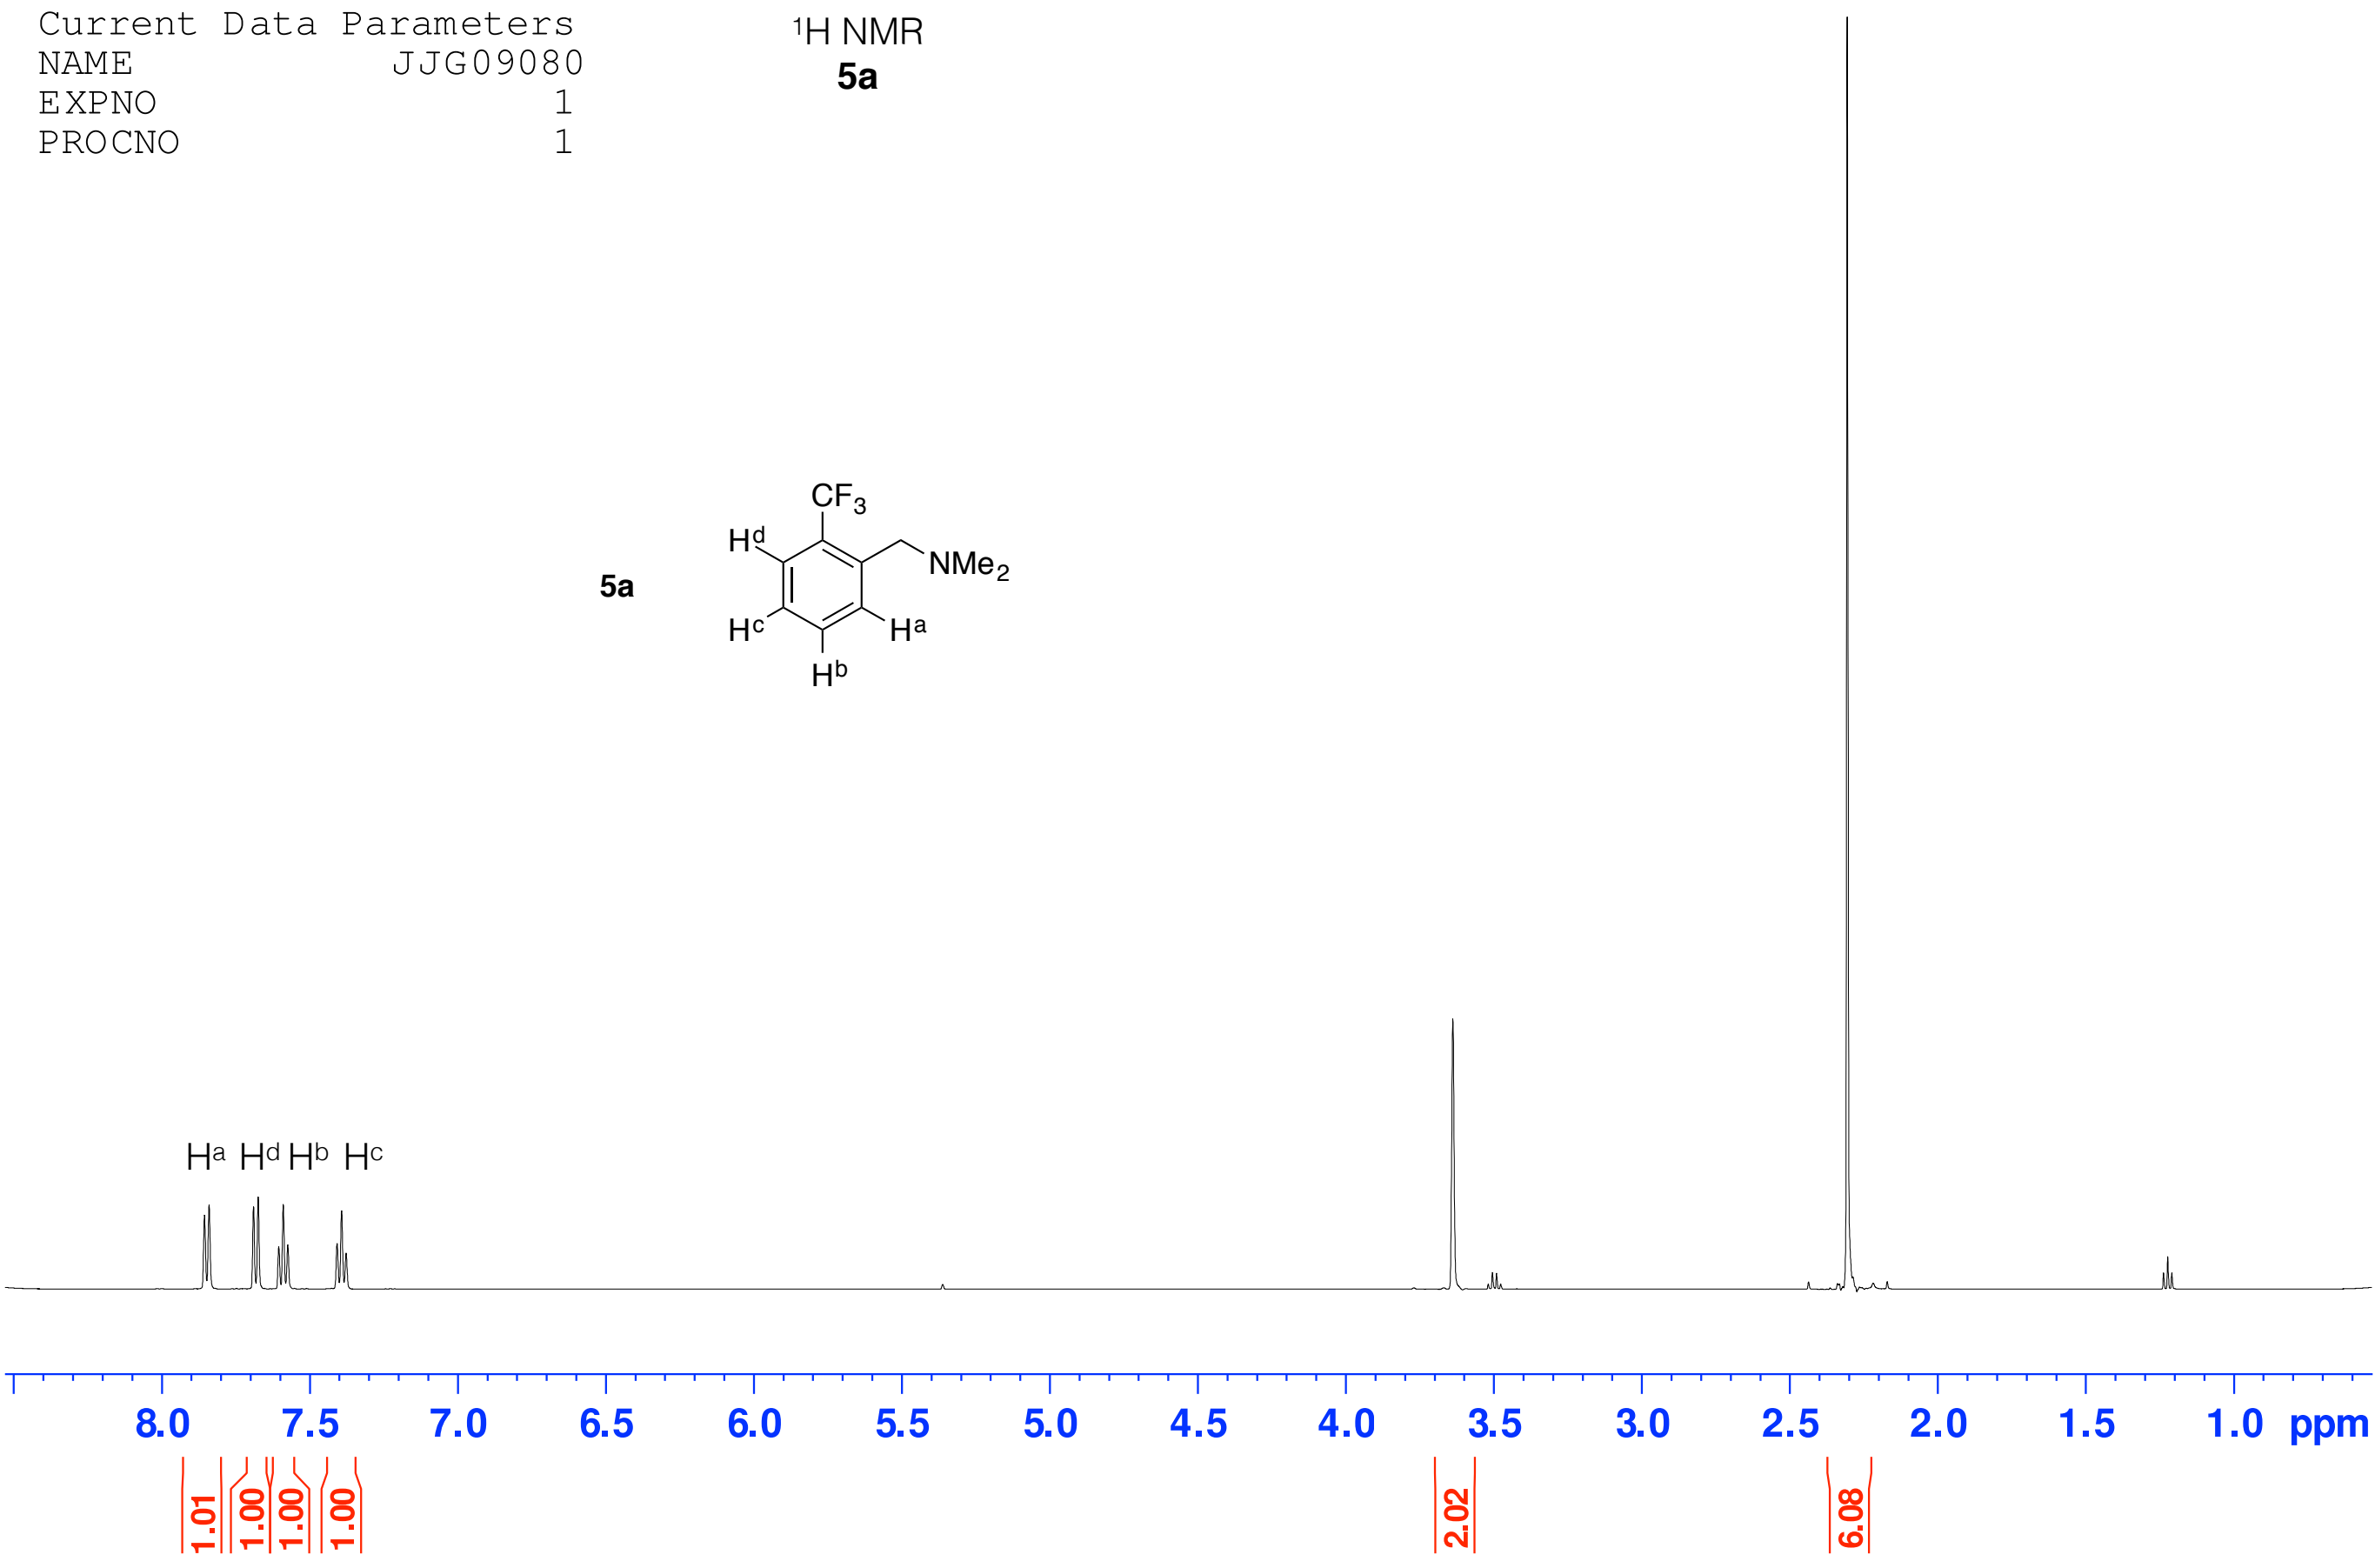

COSY

5a

JJG09080 4 1 "/Users/joe/Dropbox/Grad/NMR Backups"

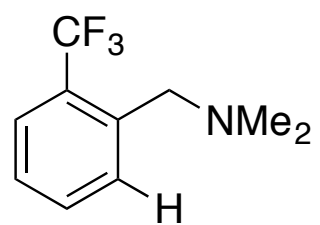

5a

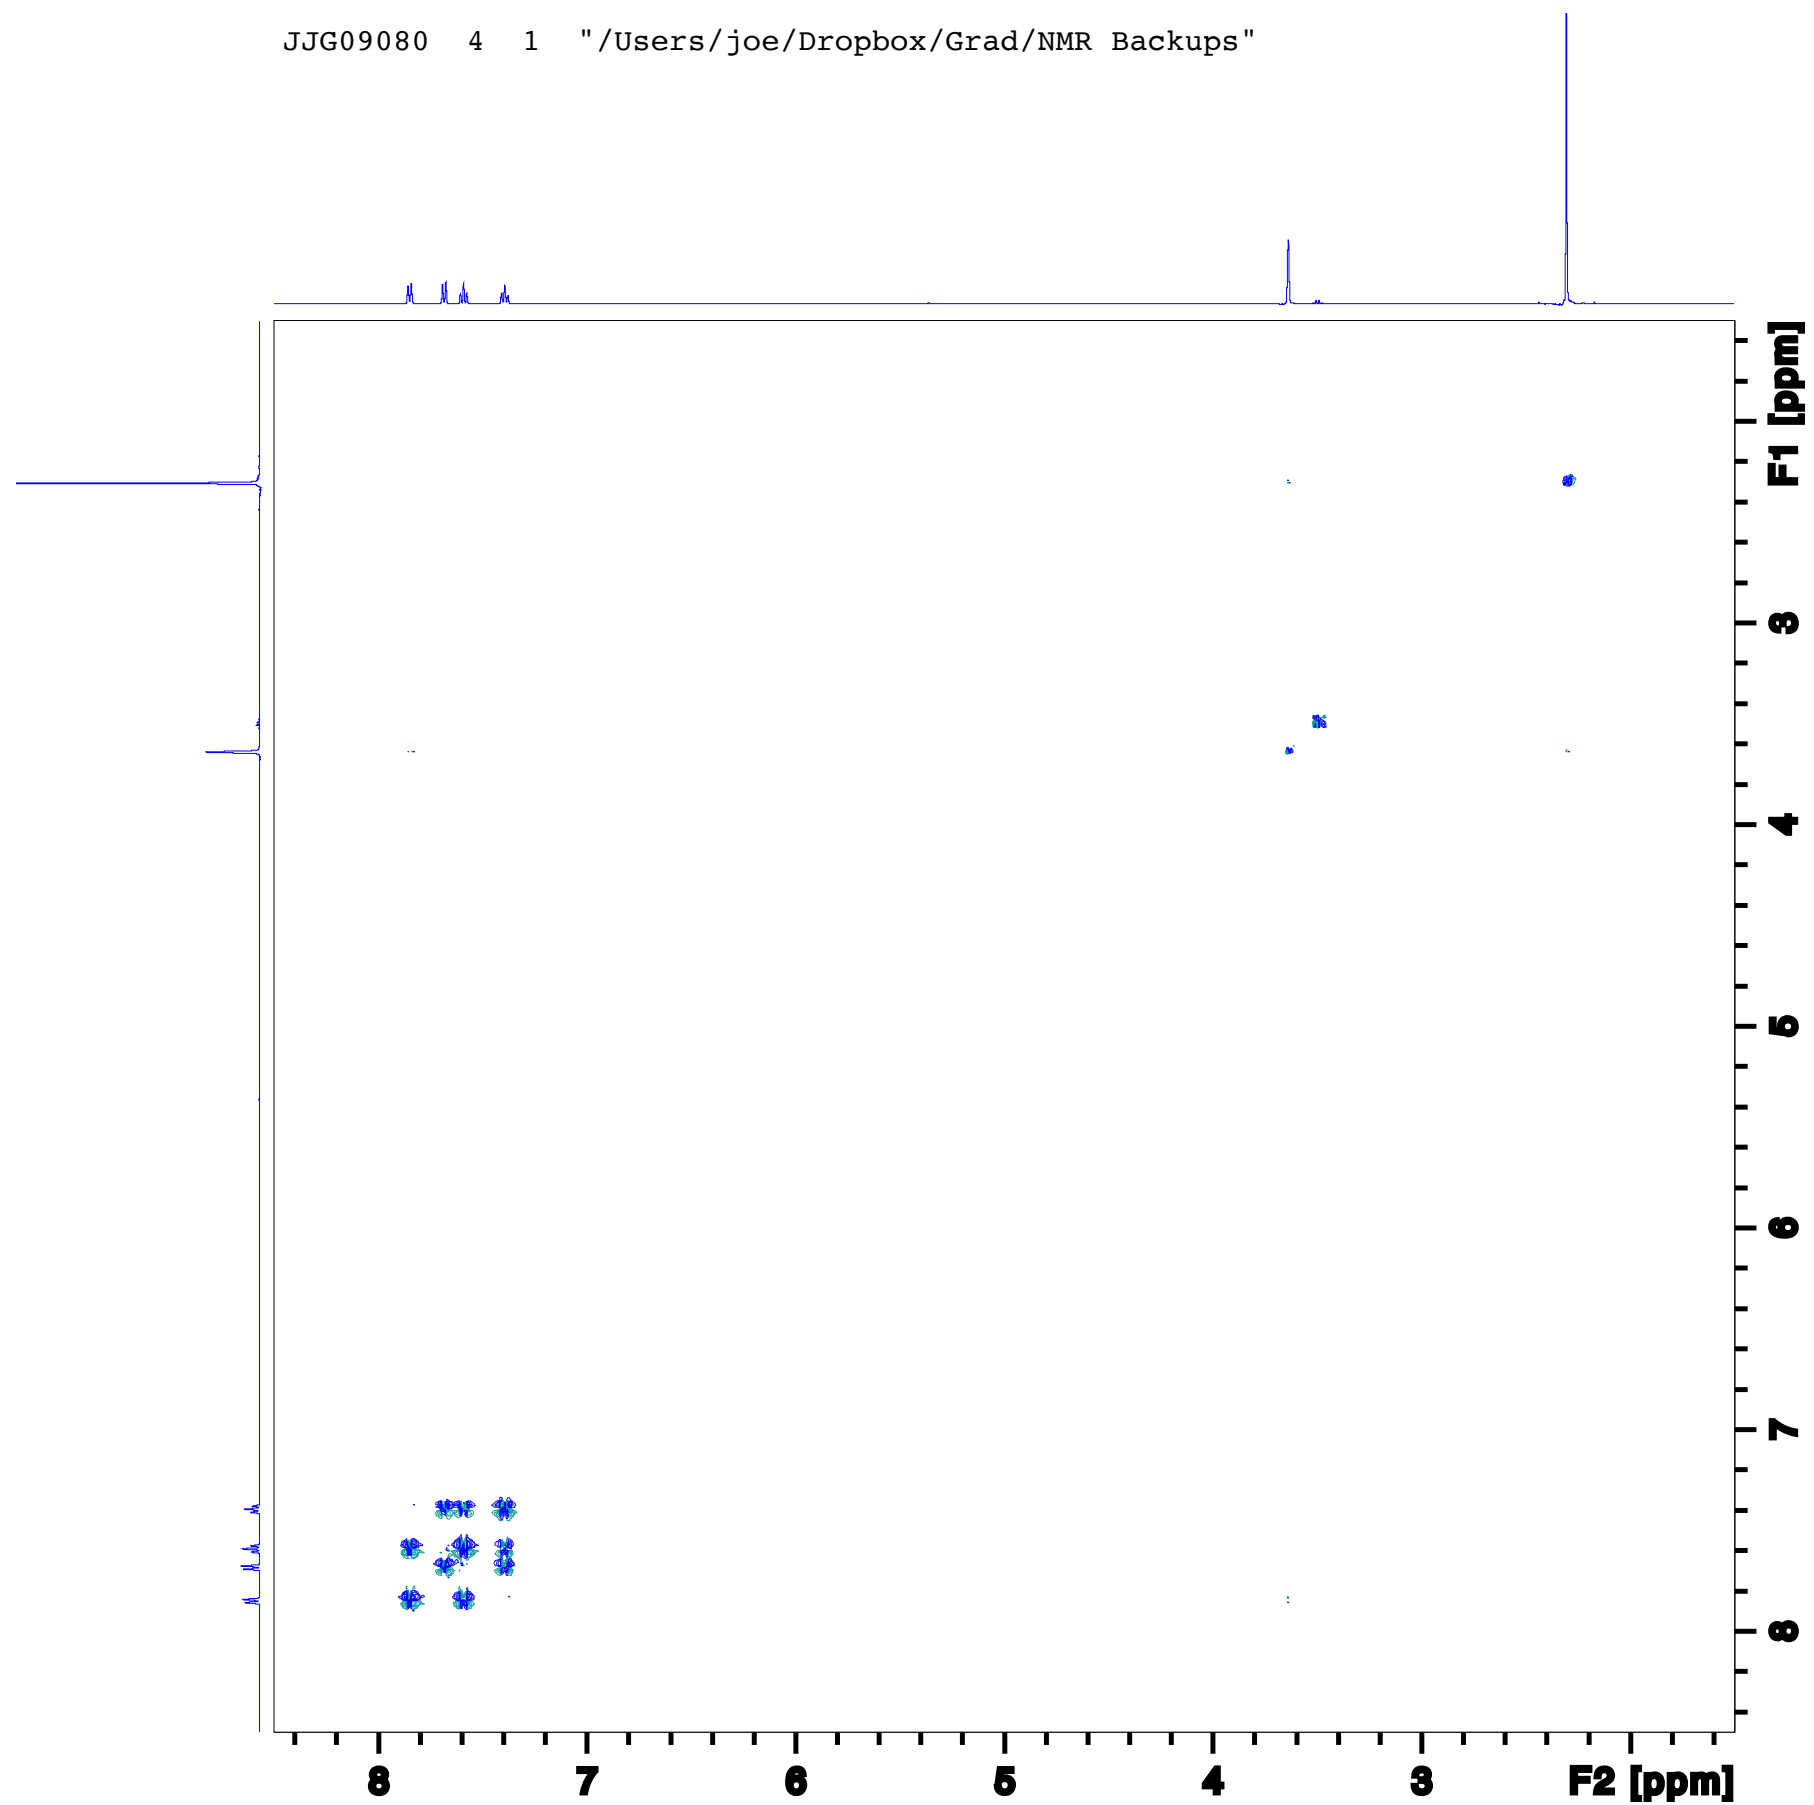

COSY aromatic

**5a**

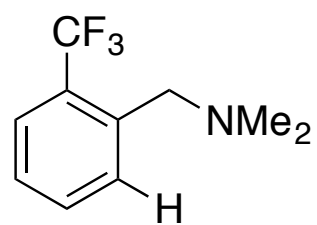

**5a**

JJG09080 4 1 "/Users/joe/Dropbox/Grad/NMR Backups"

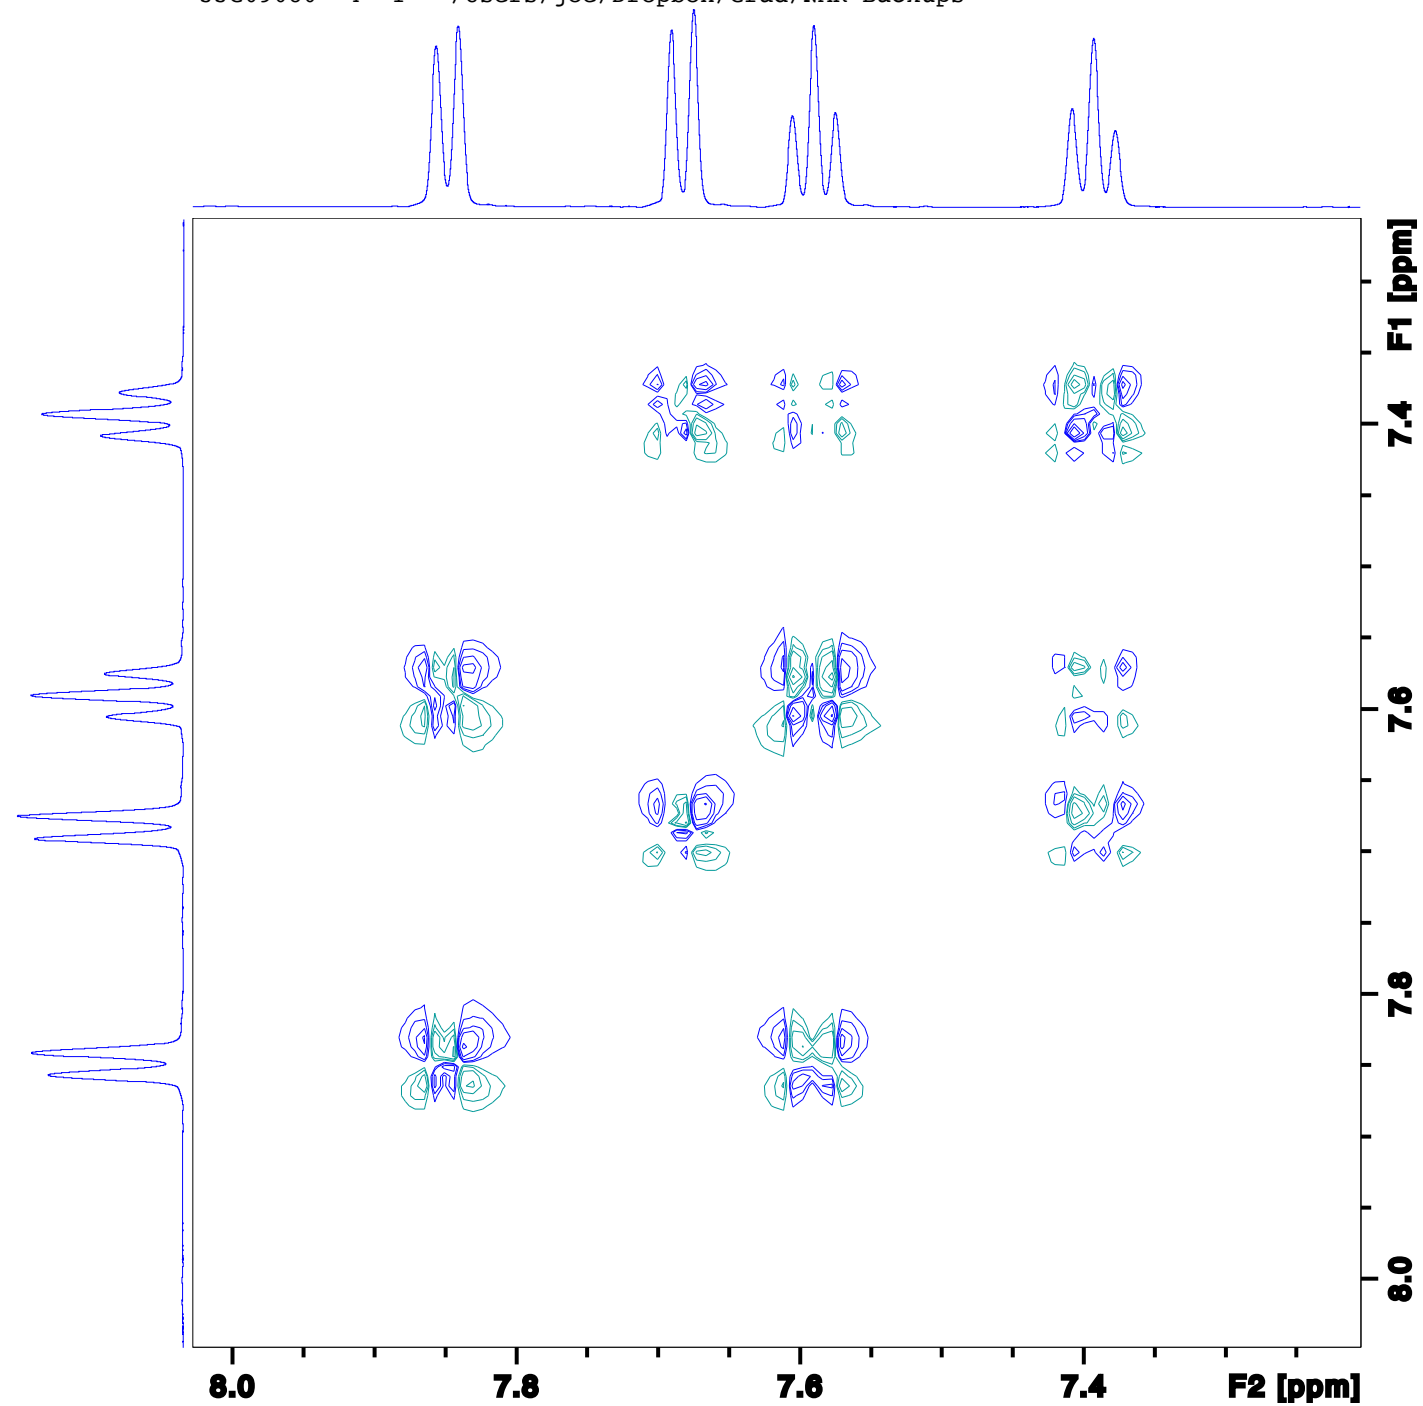

<sup>19</sup>F NMR  
5a

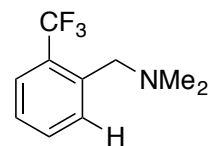

5a

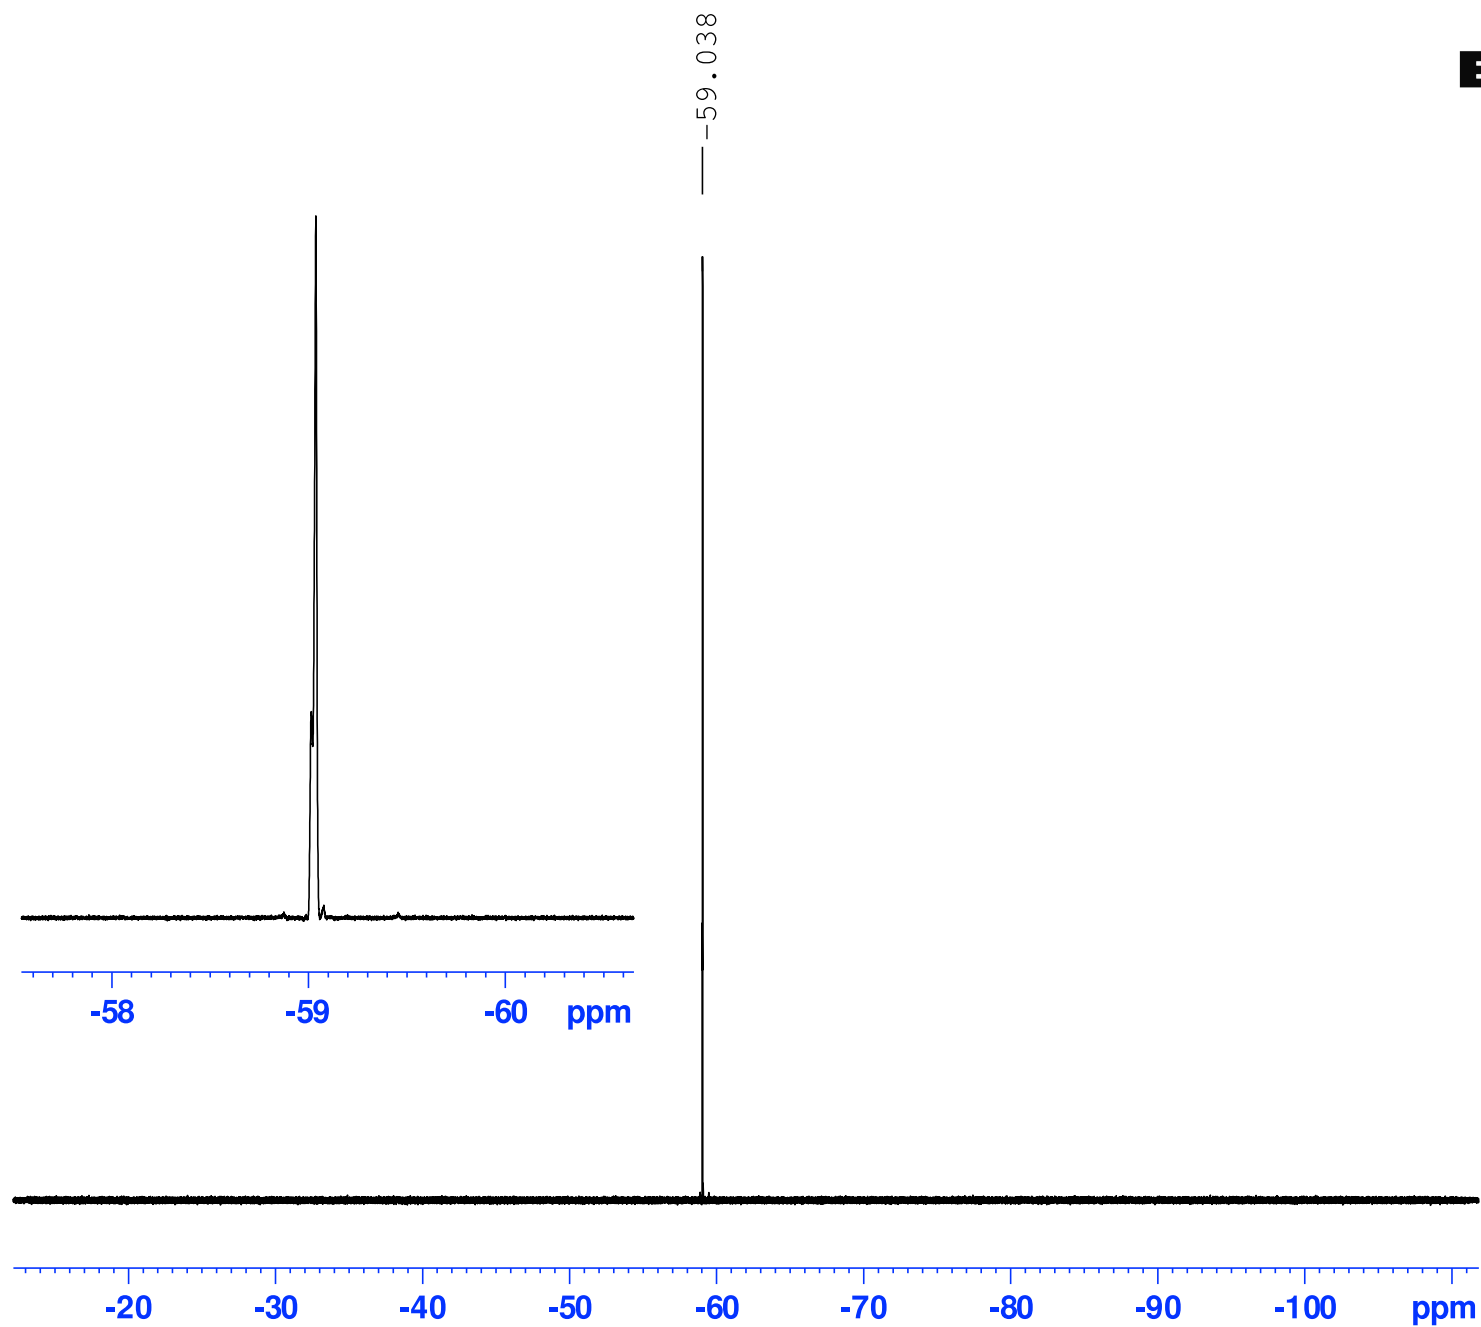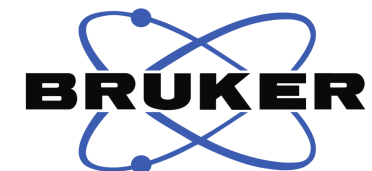

Current Data Parameters  
NAME JYG08093  
EXPNO 2  
PROCNO 1

F2 - Acquisition Parameter  
Date\_ 20160916  
Time 14.59  
INSTRUM spect  
PROBHD 5 mm PABBO BB/  
PULPROG zgflqn  
TD 281244  
SOLVENT CDCl3  
NS 1  
DS 0  
SWH 46875.000 Hz  
FIDRES 0.166670 Hz  
AQ 2.9999361 sec  
RG 435.42  
DW 10.667 usec  
DE 6.50 usec  
TE 296.1 K  
D1 3.00000000 sec  
TD0 1

===== CHANNEL f1 =====  
SF01 470.3185714 MHz  
NUC1 19F  
P1 15.00 usec  
PLW1 37.79999924 W

F2 - Processing parameters  
SI 262144  
SF 470.3477328 MHz  
WDW no  
SSB 0  
LB 0 Hz  
GB 0  
PC 1.00

5a

JJG09080 2 1 "/Users/joe/Dropbox/Grad/NMR Backups"

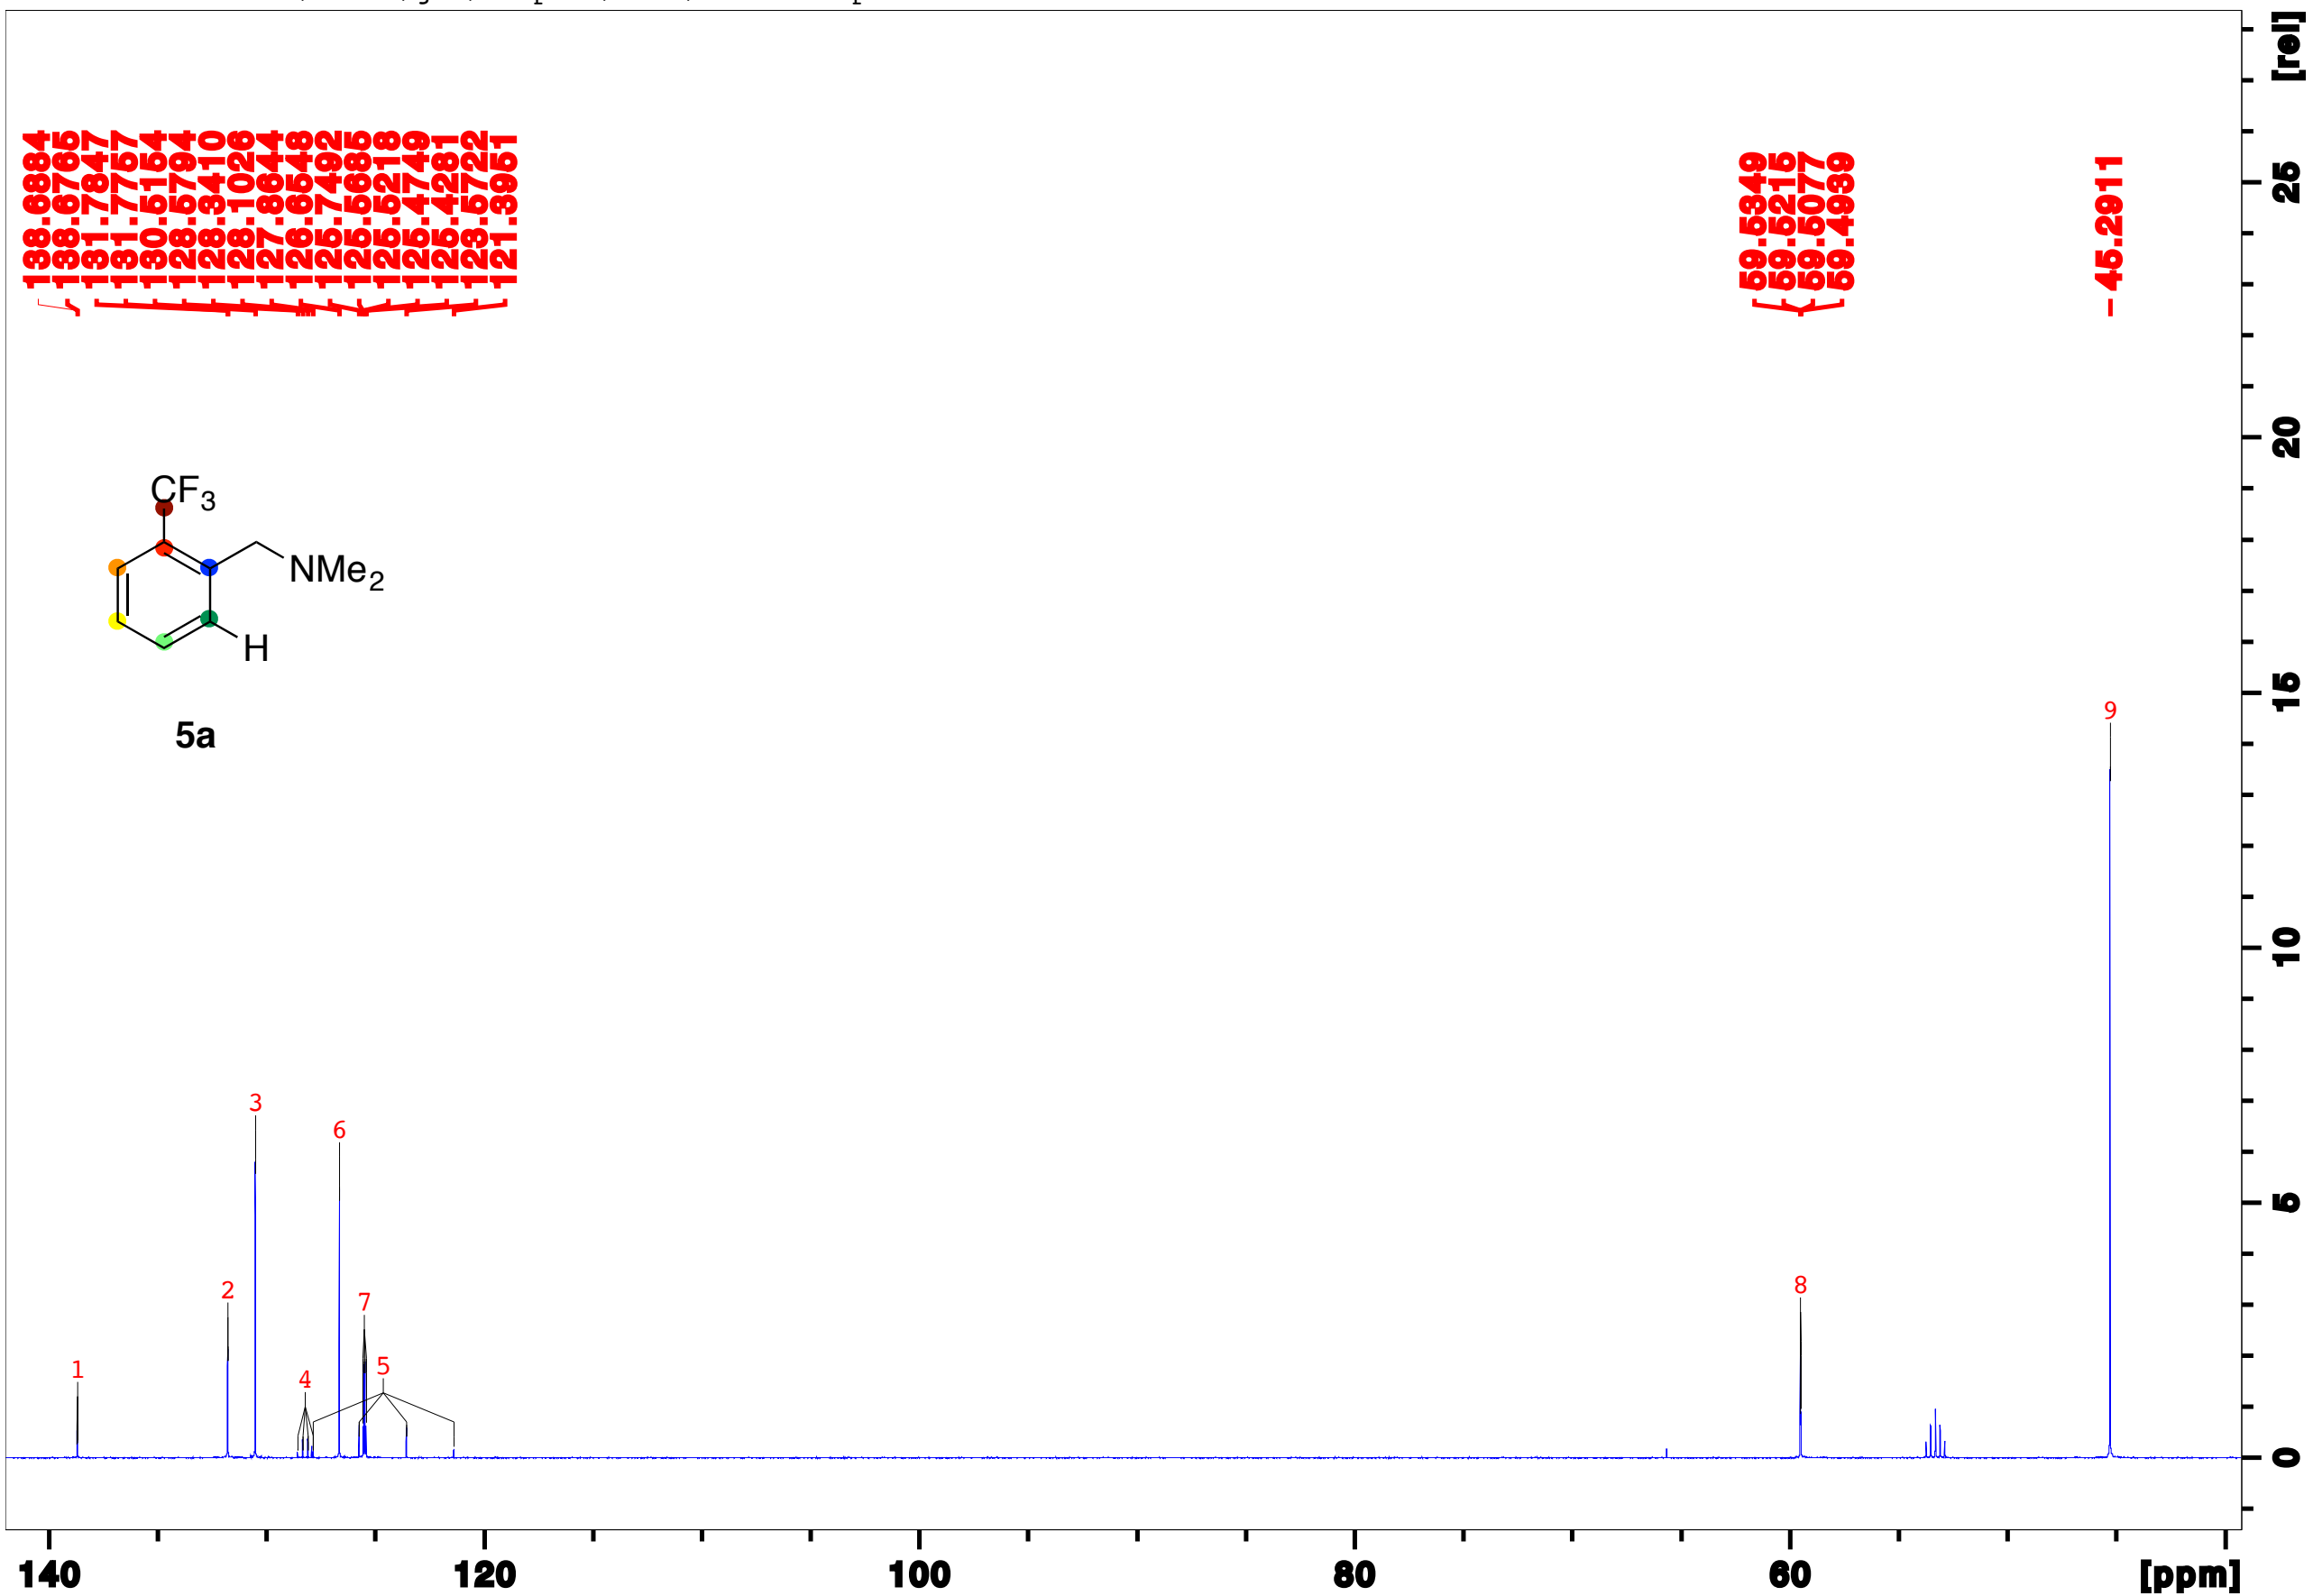

**5a**

JJG09080 2 1 "/Users/joe/Dropbox/Grad/NMR Backups"

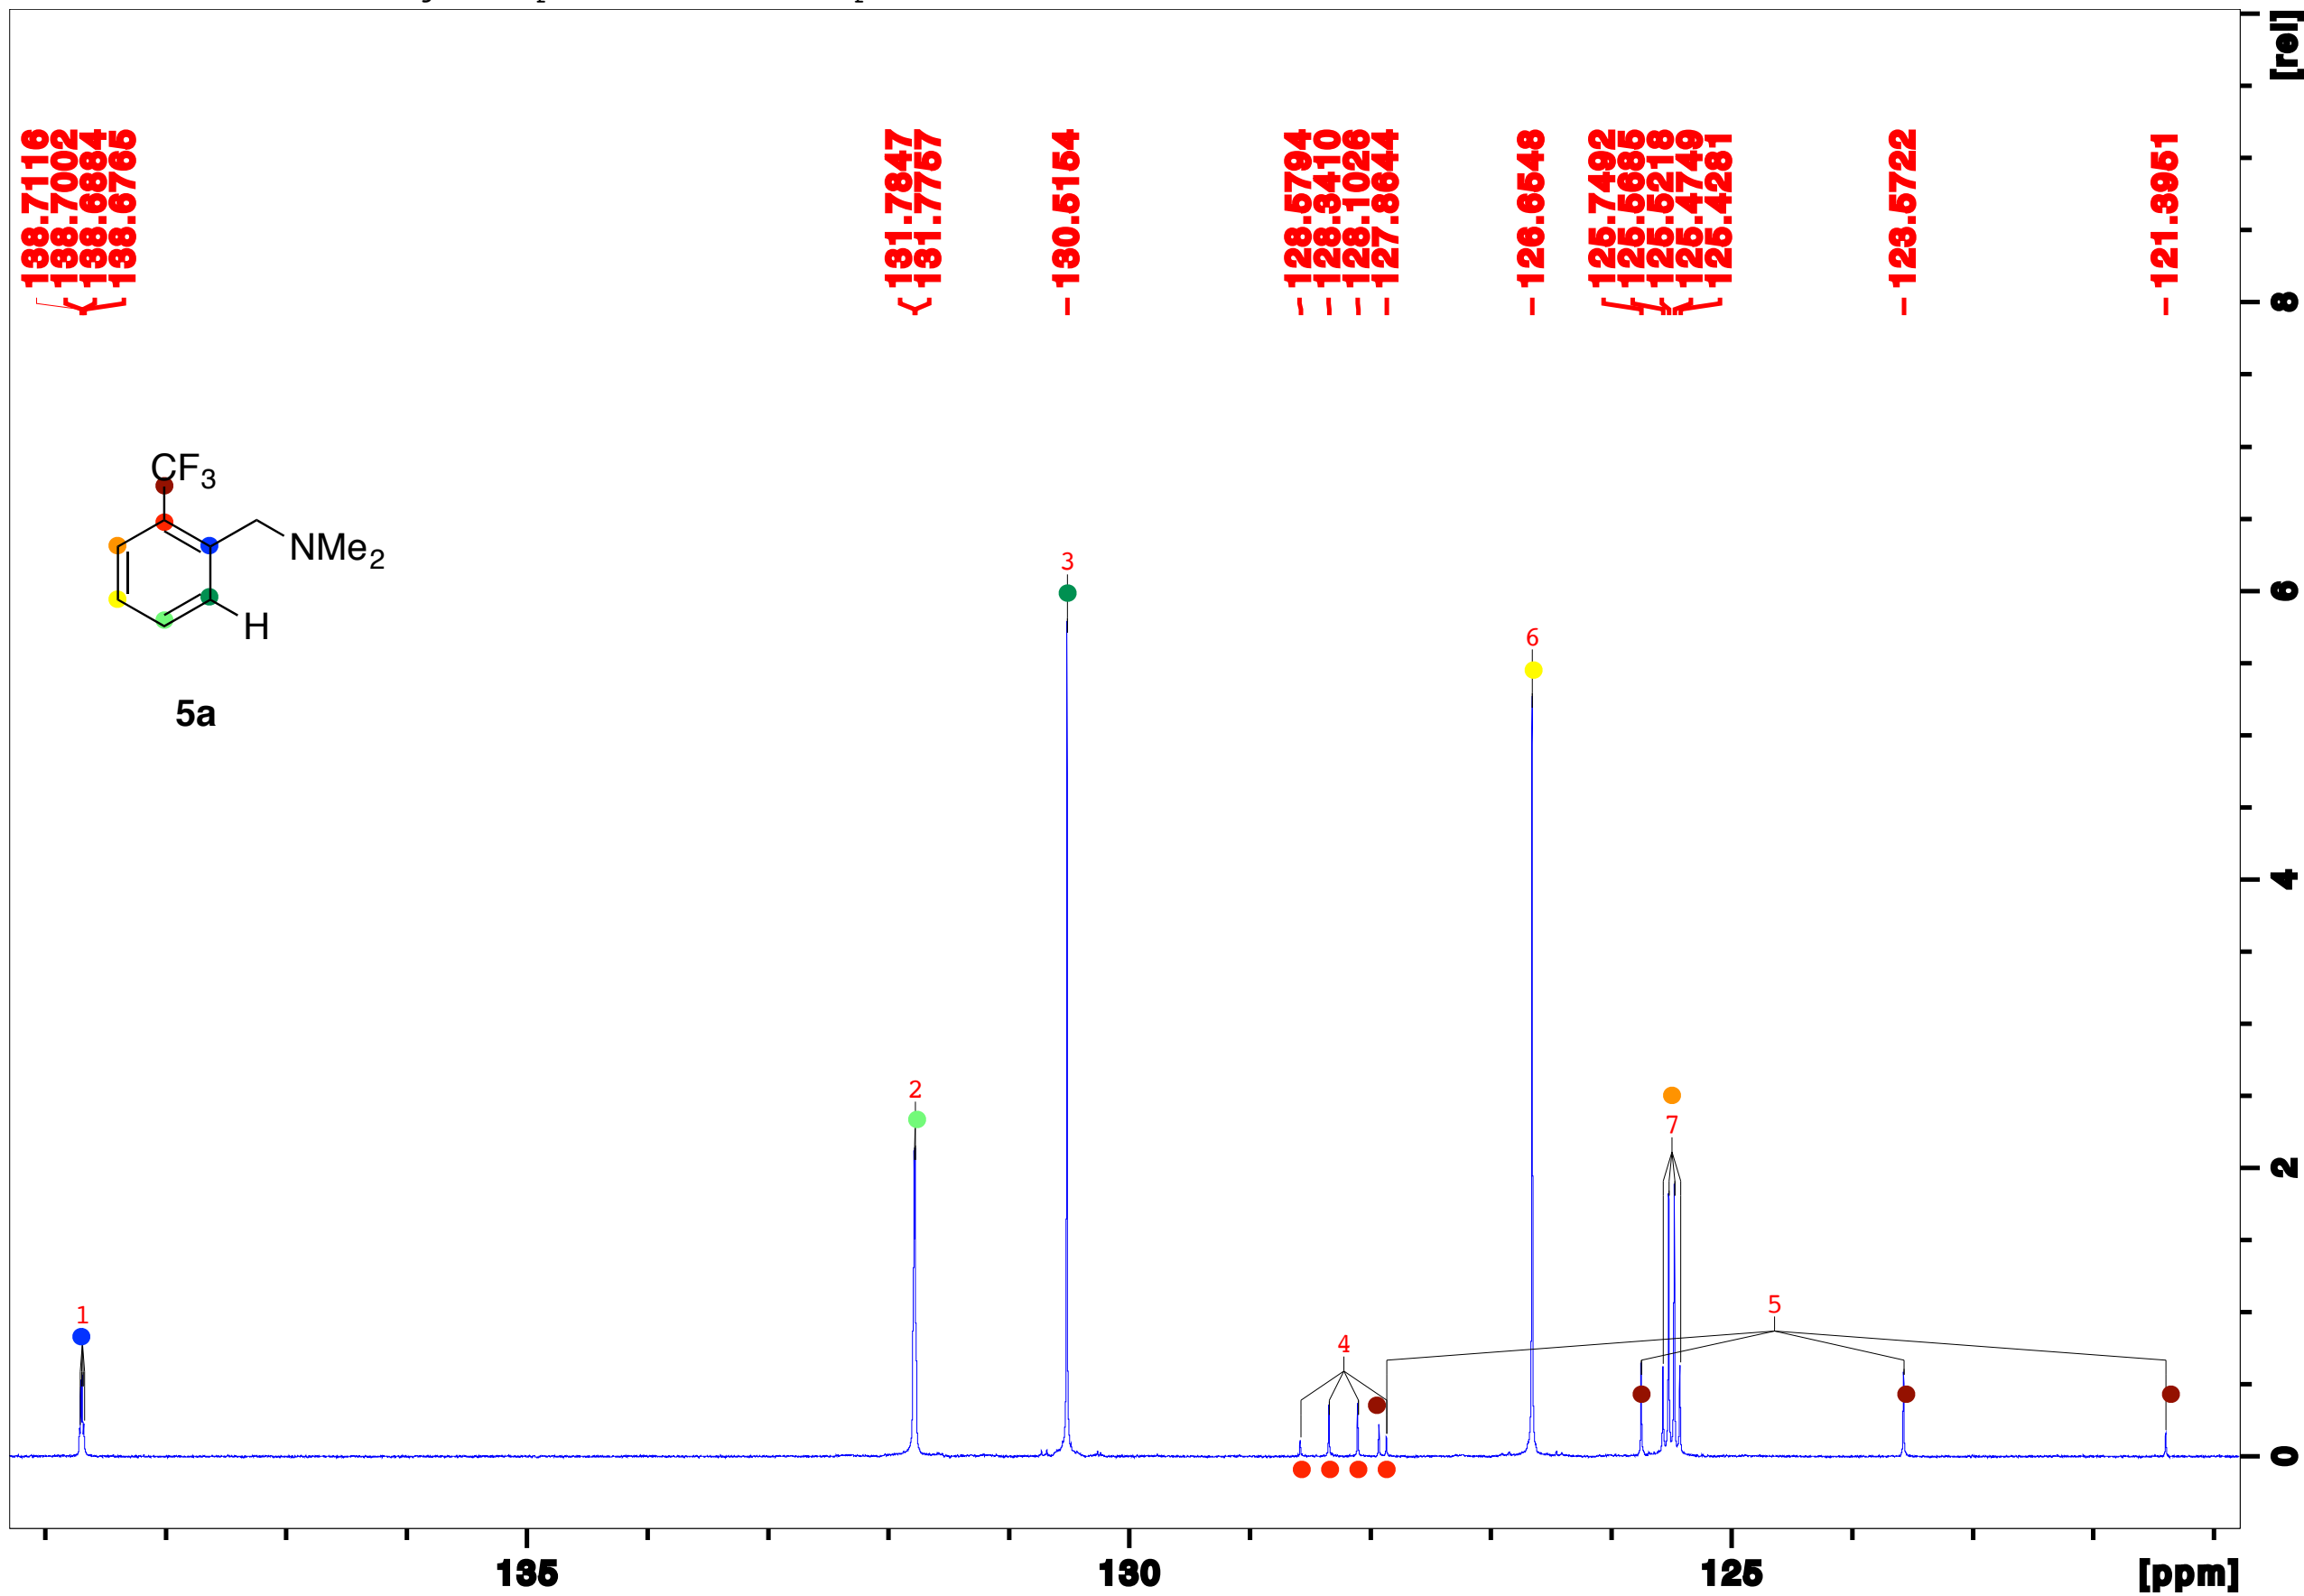



HMQC  
5a

JJG09080 3 1 "/Users/joe/Dropbox/Grad/NMR Backups"

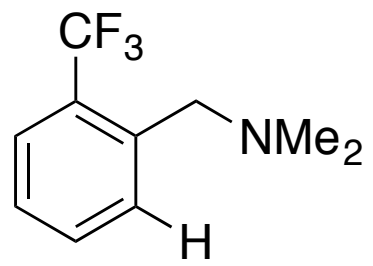

5a

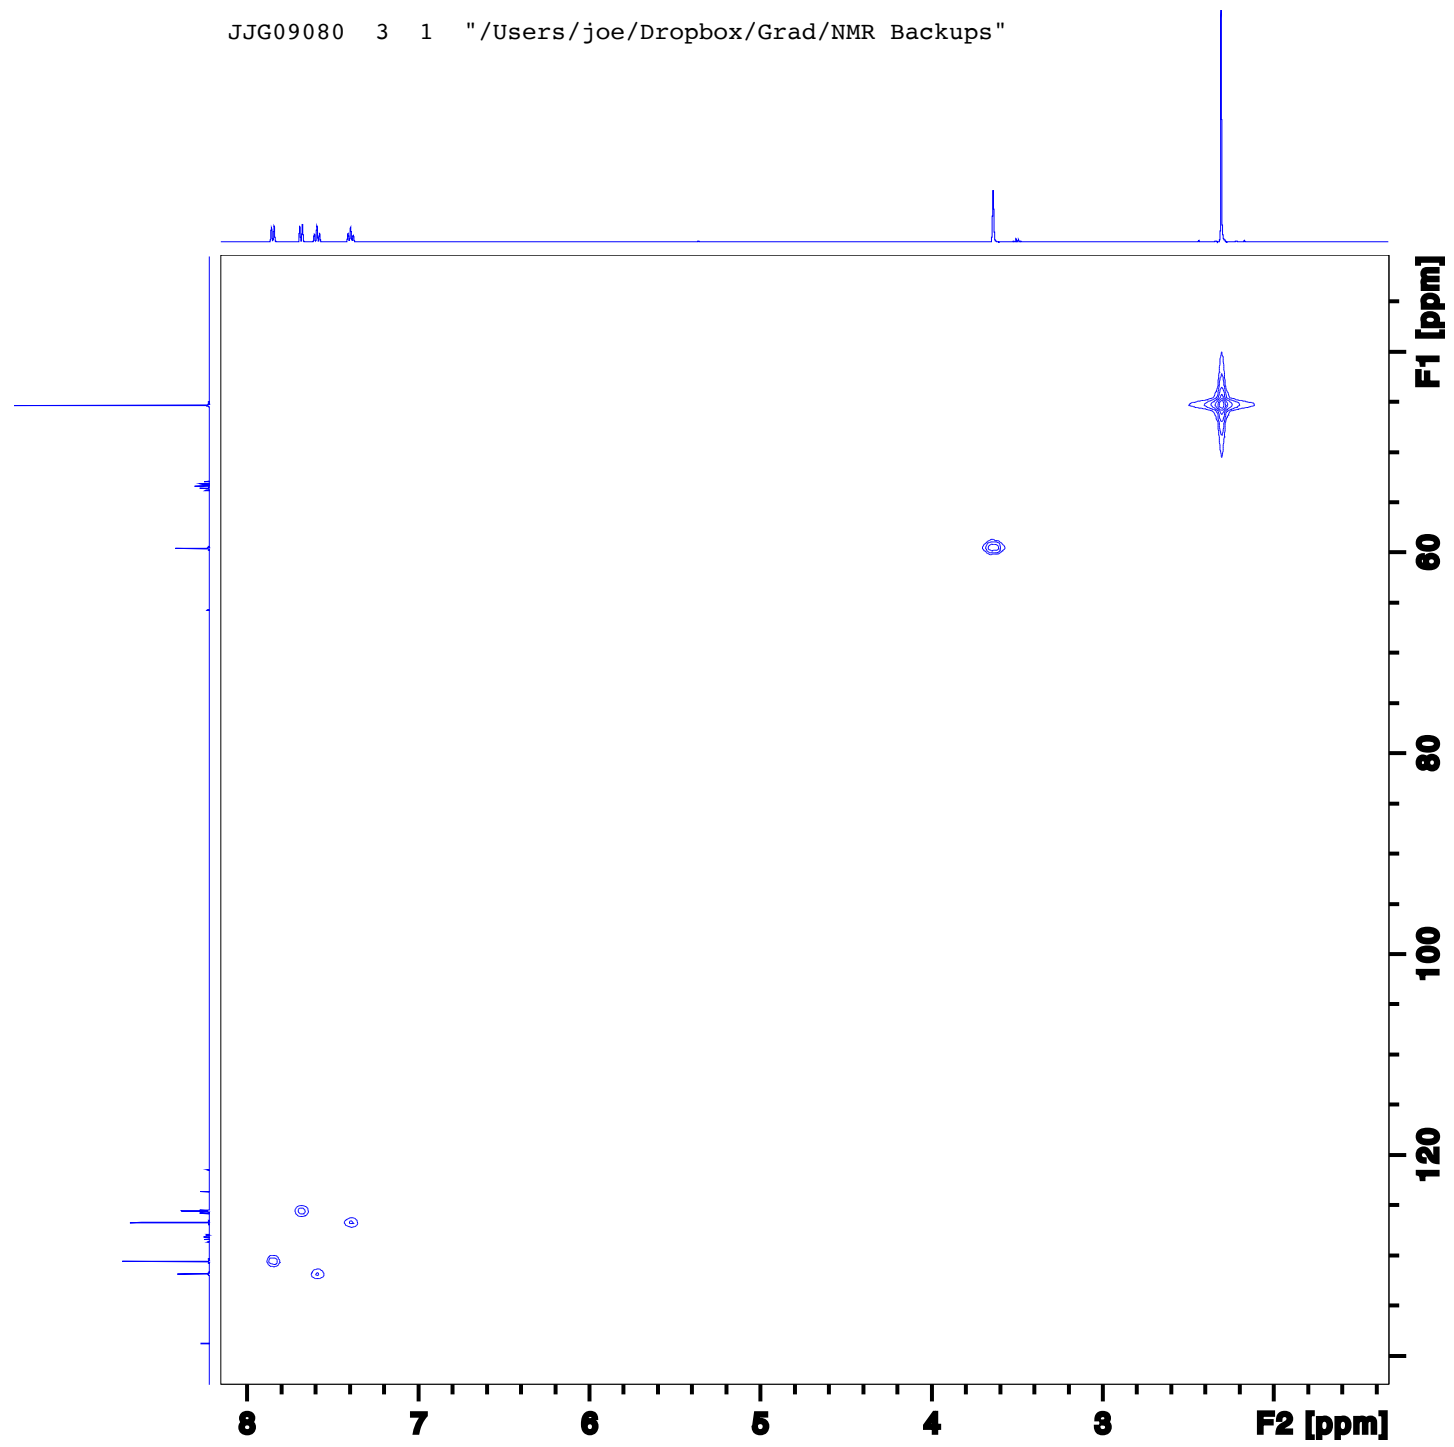

HMQC aromatic  
**5a**

JJG09080 3 1 "/Users/joe/Dropbox/Grad/NMR Backups"

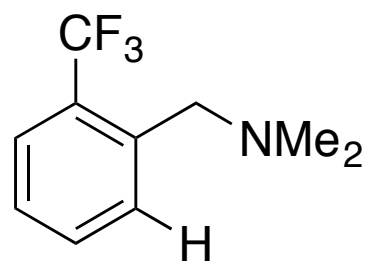

**5a**

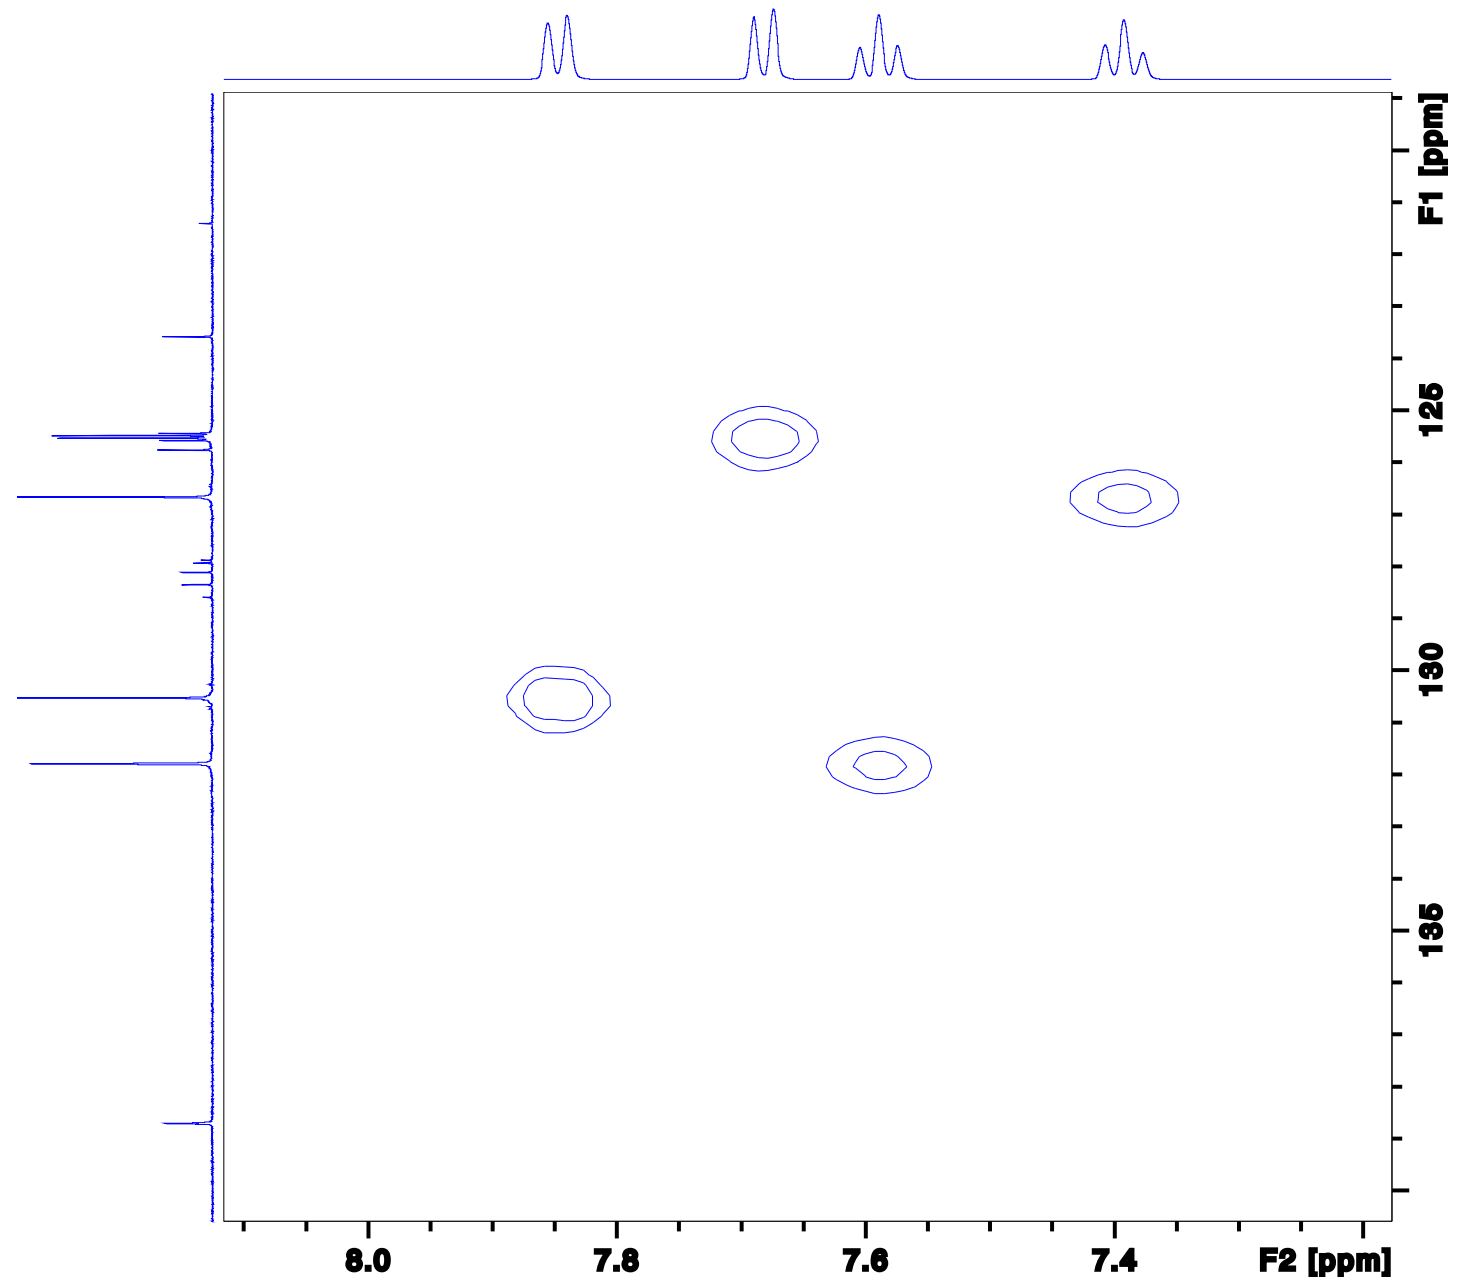

**6a** [Pd(o-CF<sub>3</sub>-dmba)(NAc-Gly)]<sub>2</sub> 5 mM, more dilute sample shows separate NMe and Ac peaks

7.376  
7.361  
7.232  
7.218  
7.118  
7.103  
7.087

6.375 Current Data Parameters  
NAME JJG09068  
EXPNO 7  
PROCNO 1

4.071  
4.059  
4.035  
4.023  
3.962  
3.951  
3.926  
3.916  
3.550  
3.521  
3.505  
3.475

2.795  
2.071  
2.061

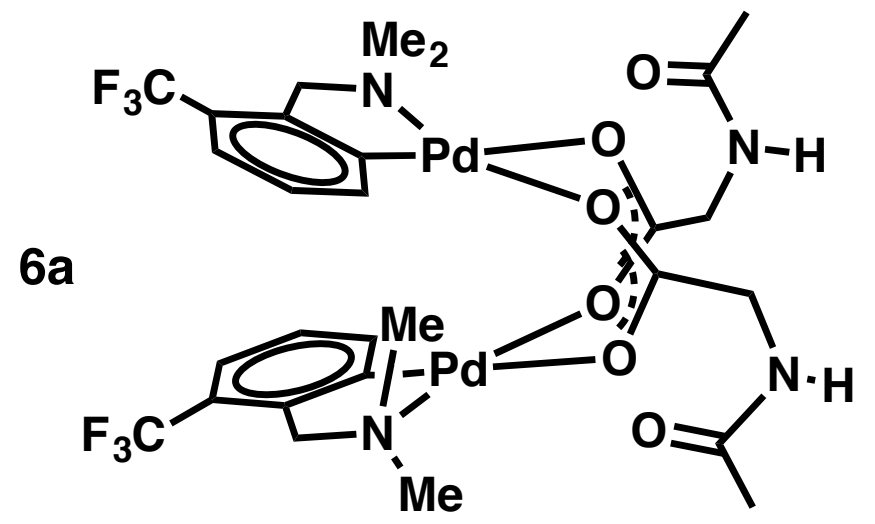

NMe toward pi face  
acetyl Me

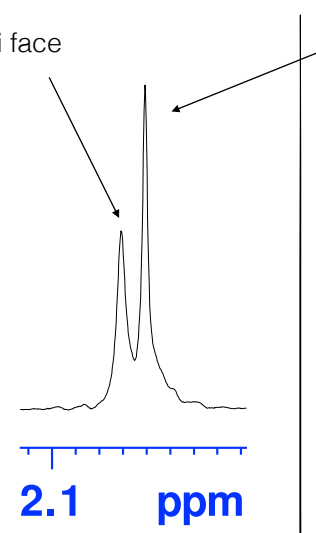

glycine methylenes

NMe away from pi face

benzylic methylenes

para to Pd

ortho to Pd

meta to Pd

N-H

CH<sub>2</sub>Cl<sub>2</sub>

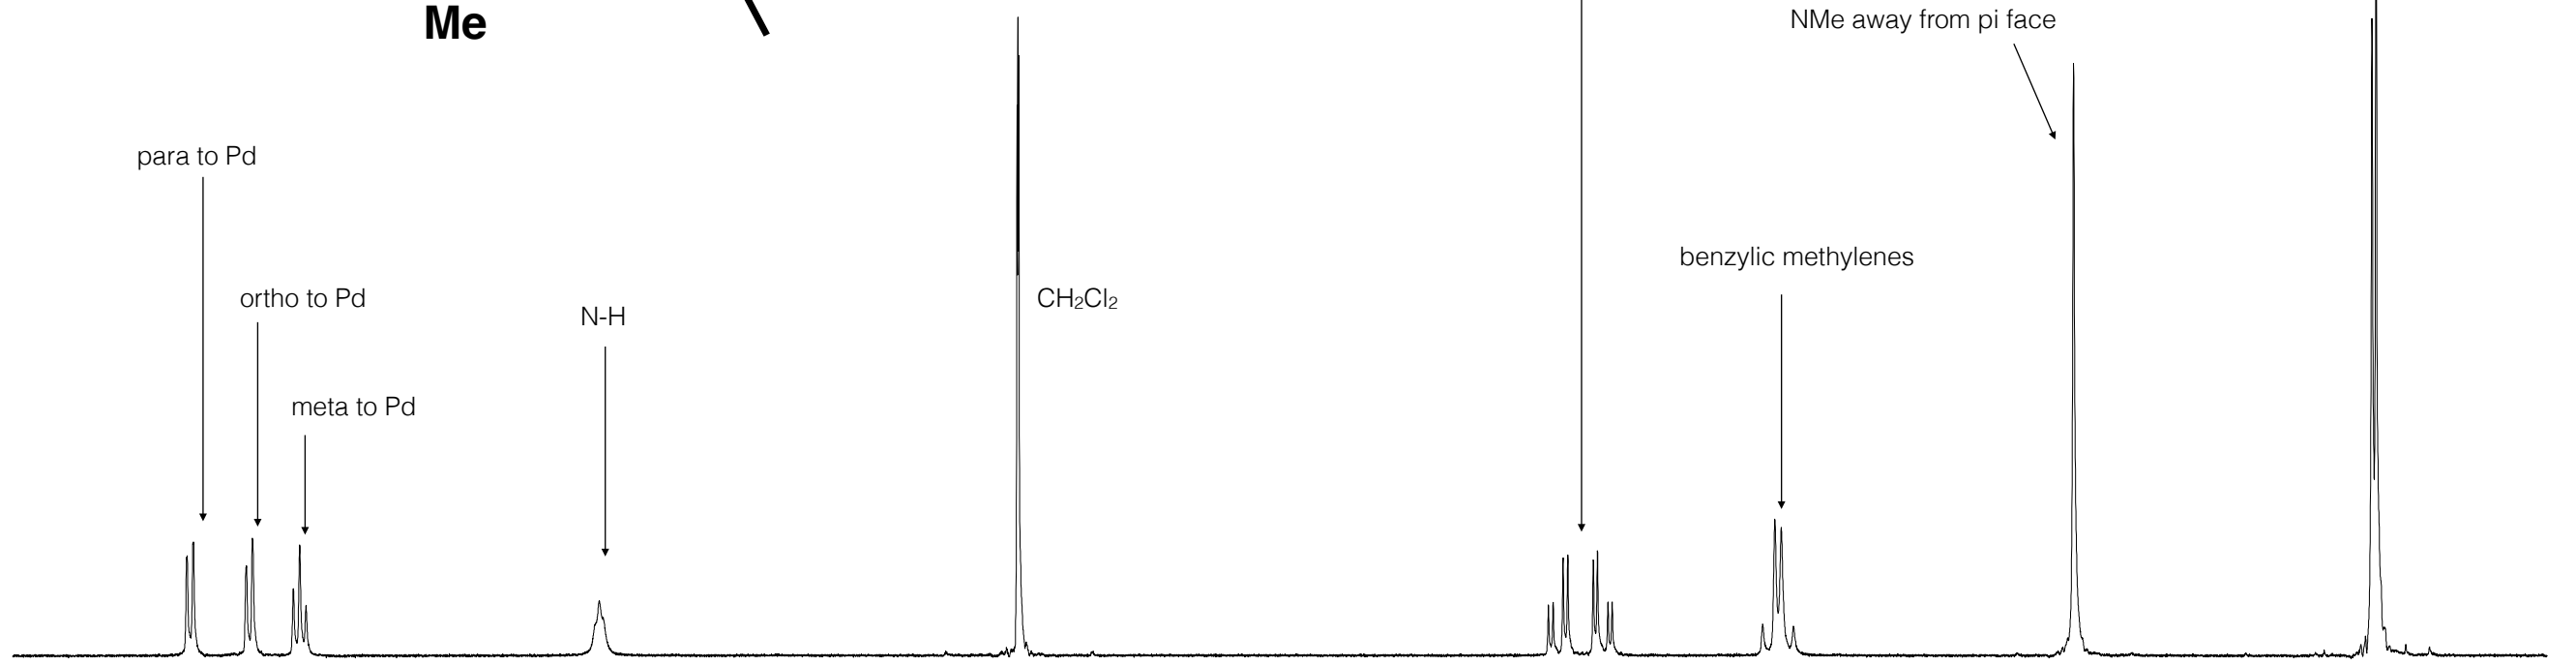

7.5 7.0 6.5 6.0 5.5 5.0 4.5 4.0 3.5 3.0 2.5 2.0 ppm

2.01 2.01 2.00 2.00 4.05 4.07 6.00 12.05

# $^1\text{H}$ [Pd(o-CF<sub>3</sub>-dmba)(NAc-Gly)]<sub>2</sub> 30 mM

7.382  
7.367  
7.252  
7.237  
7.129  
7.113  
7.098  
— 6.737

4.174  
4.161  
4.138  
4.126  
4.043  
4.033  
4.008  
3.998  
3.561  
3.532  
3.510  
3.480  
— 2.787  
— 2.085

Current Data Parameters  
NAME JJG06113  
EXPNO 1  
PROCNO 1

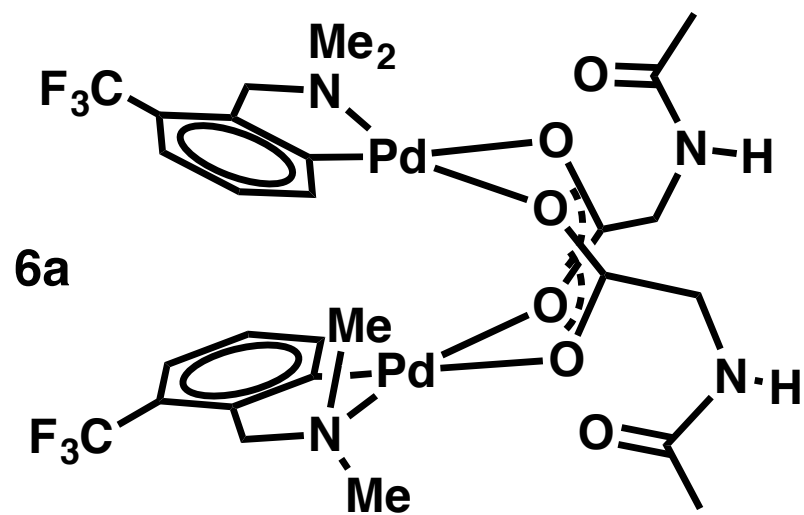

NMe toward pi face  
overlapped with acetyl Me

NMe away from pi face

para to Pd

ortho to Pd

meta to Pd

N-H

glycine methylene

benzylic methylenes

7.5 7.0 6.5 6.0 5.5 5.0 4.5 4.0 3.5 3.0 2.5 2.0 ppm

2.02  
2.01  
2.01  
1.83

16

4.00  
3.99  
6.02  
11.88

COSY

[Pd(o-CF<sub>3</sub>-dmba)(NAc-Gly)]<sub>2</sub>

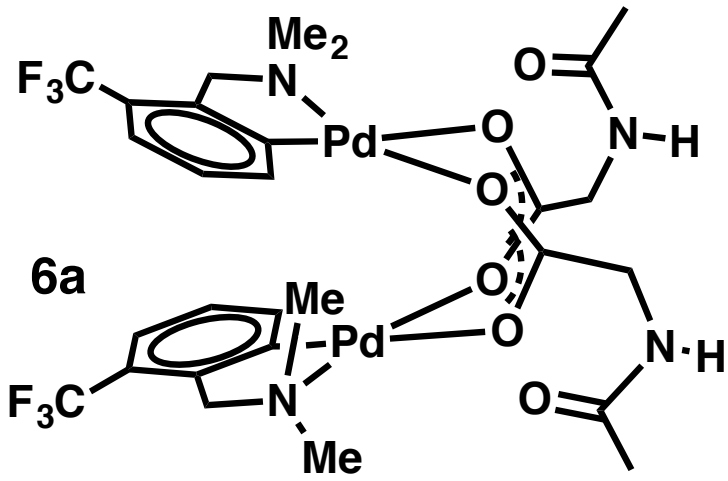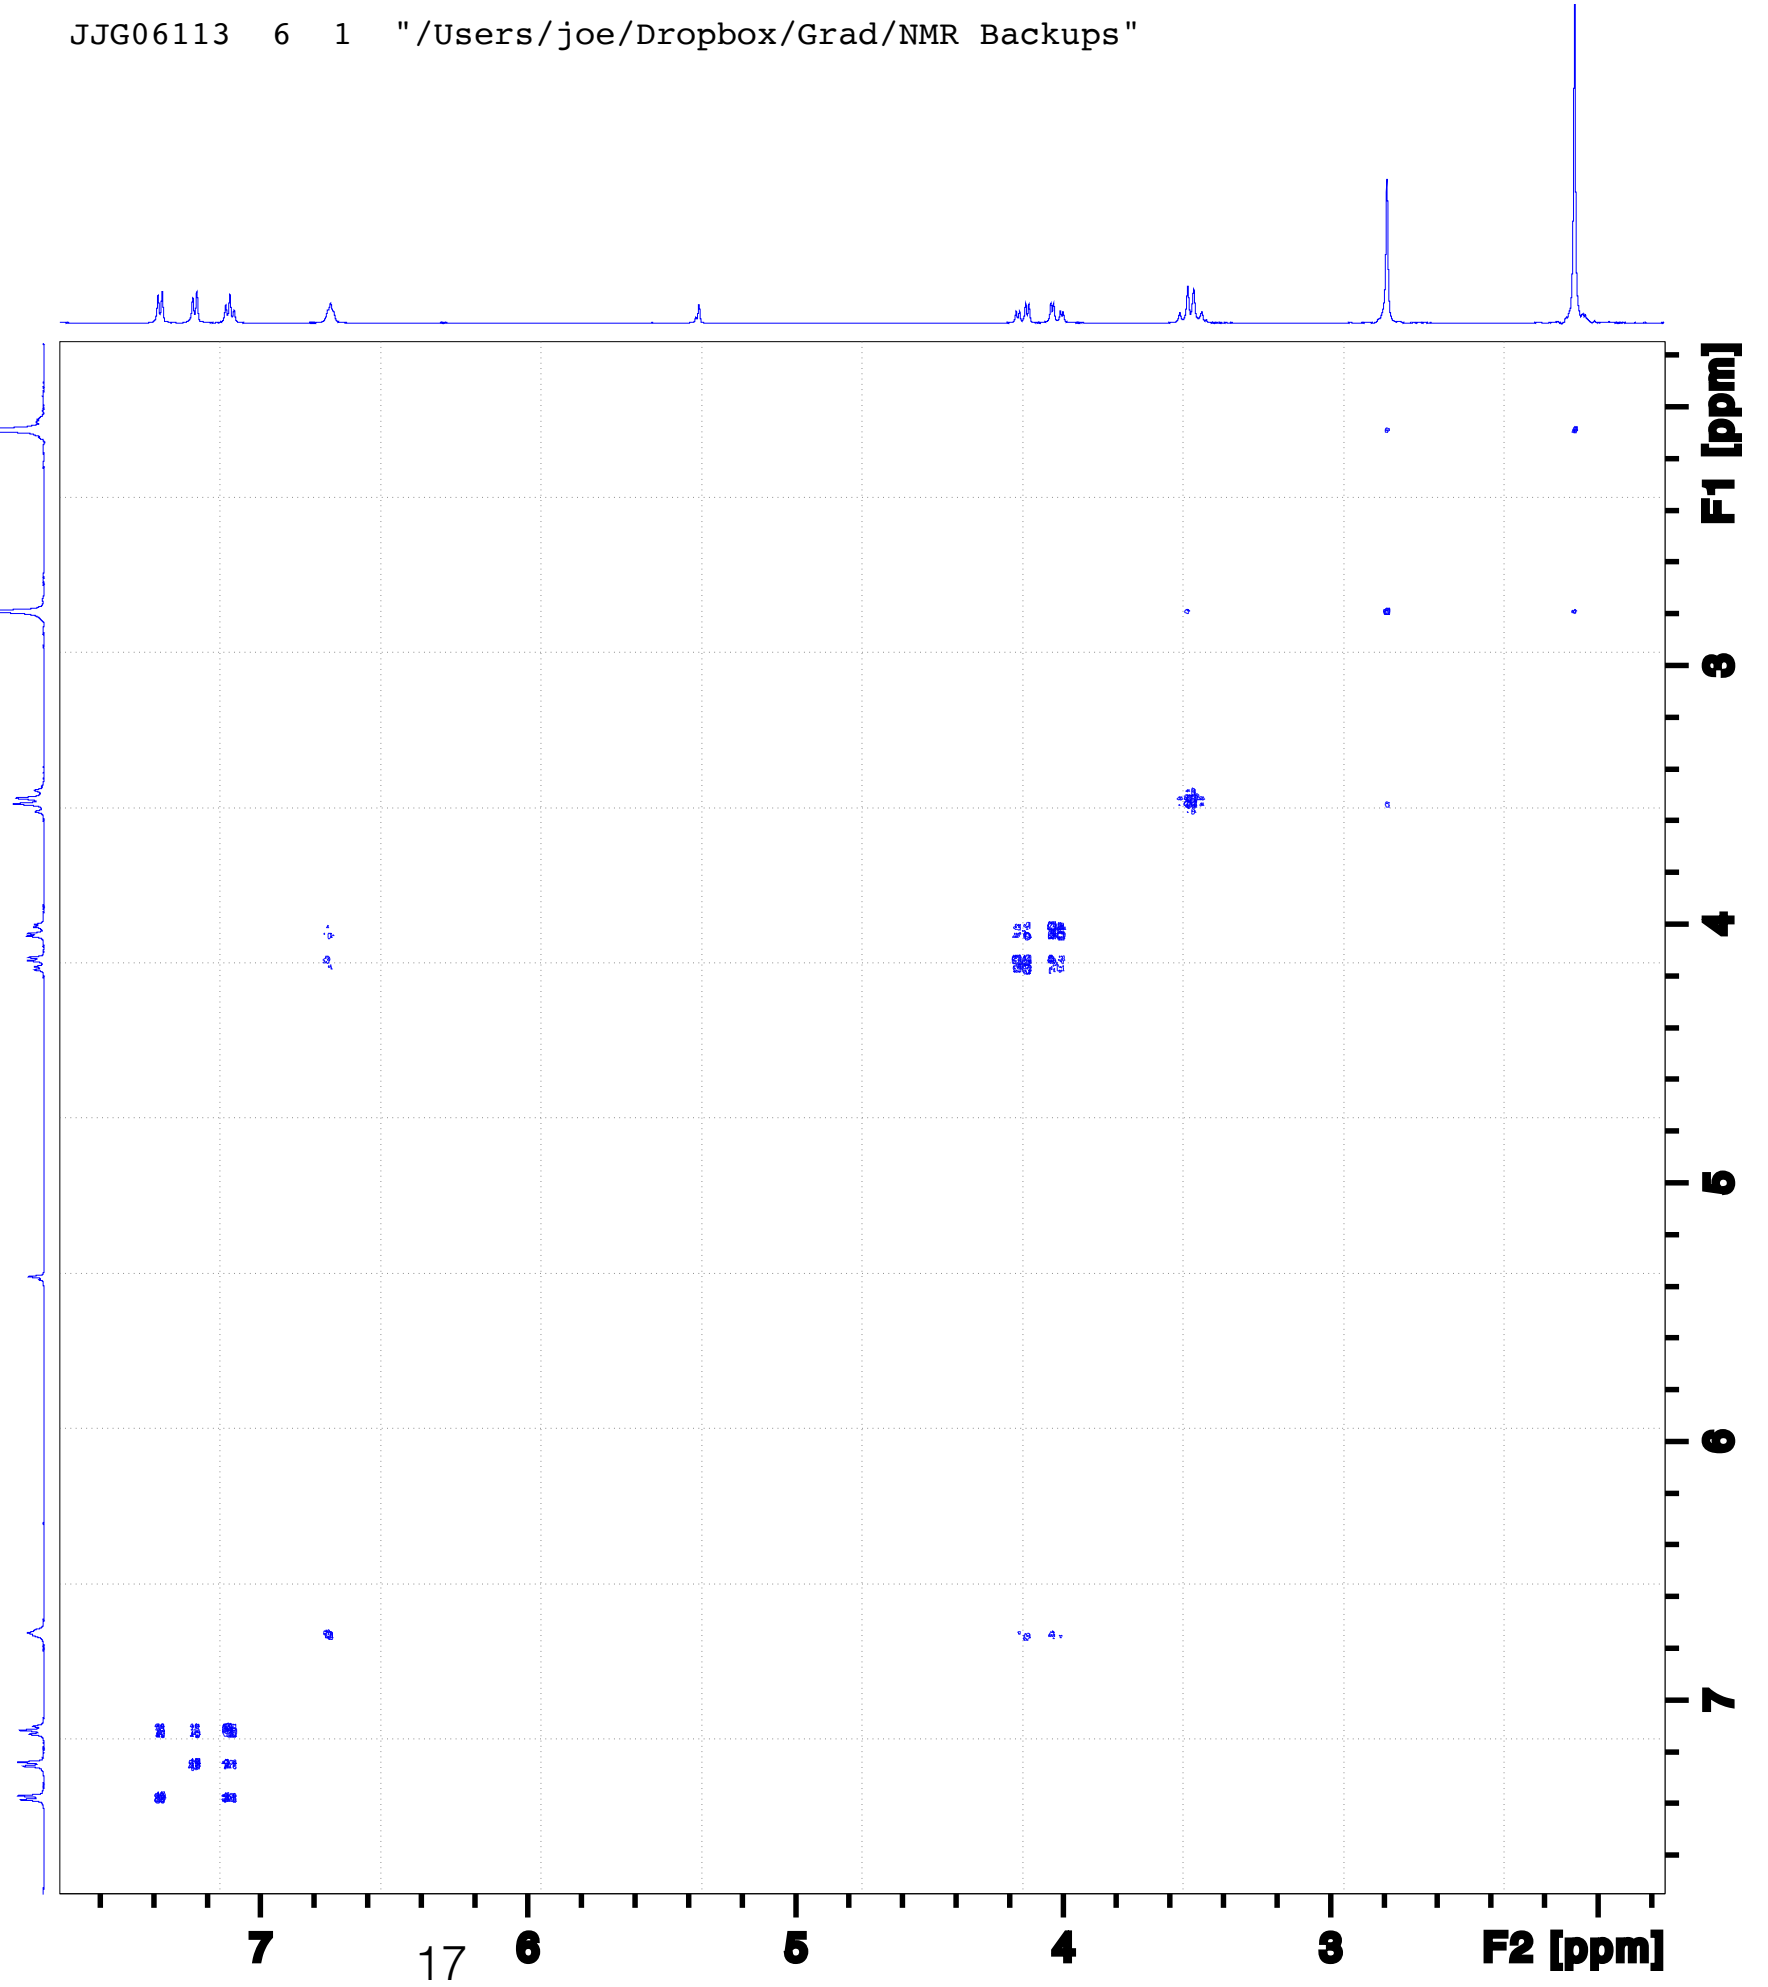

NOESY

 $[\text{Pd}(\text{o-CF}_3\text{-dmba})(\text{NAc-Gly})]_2$ 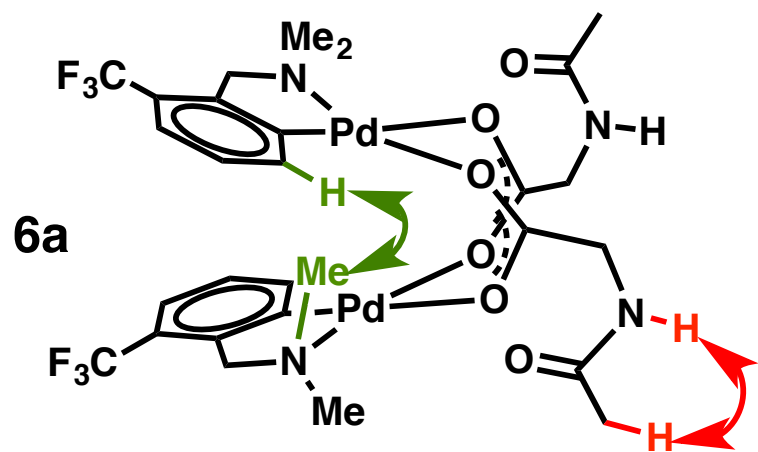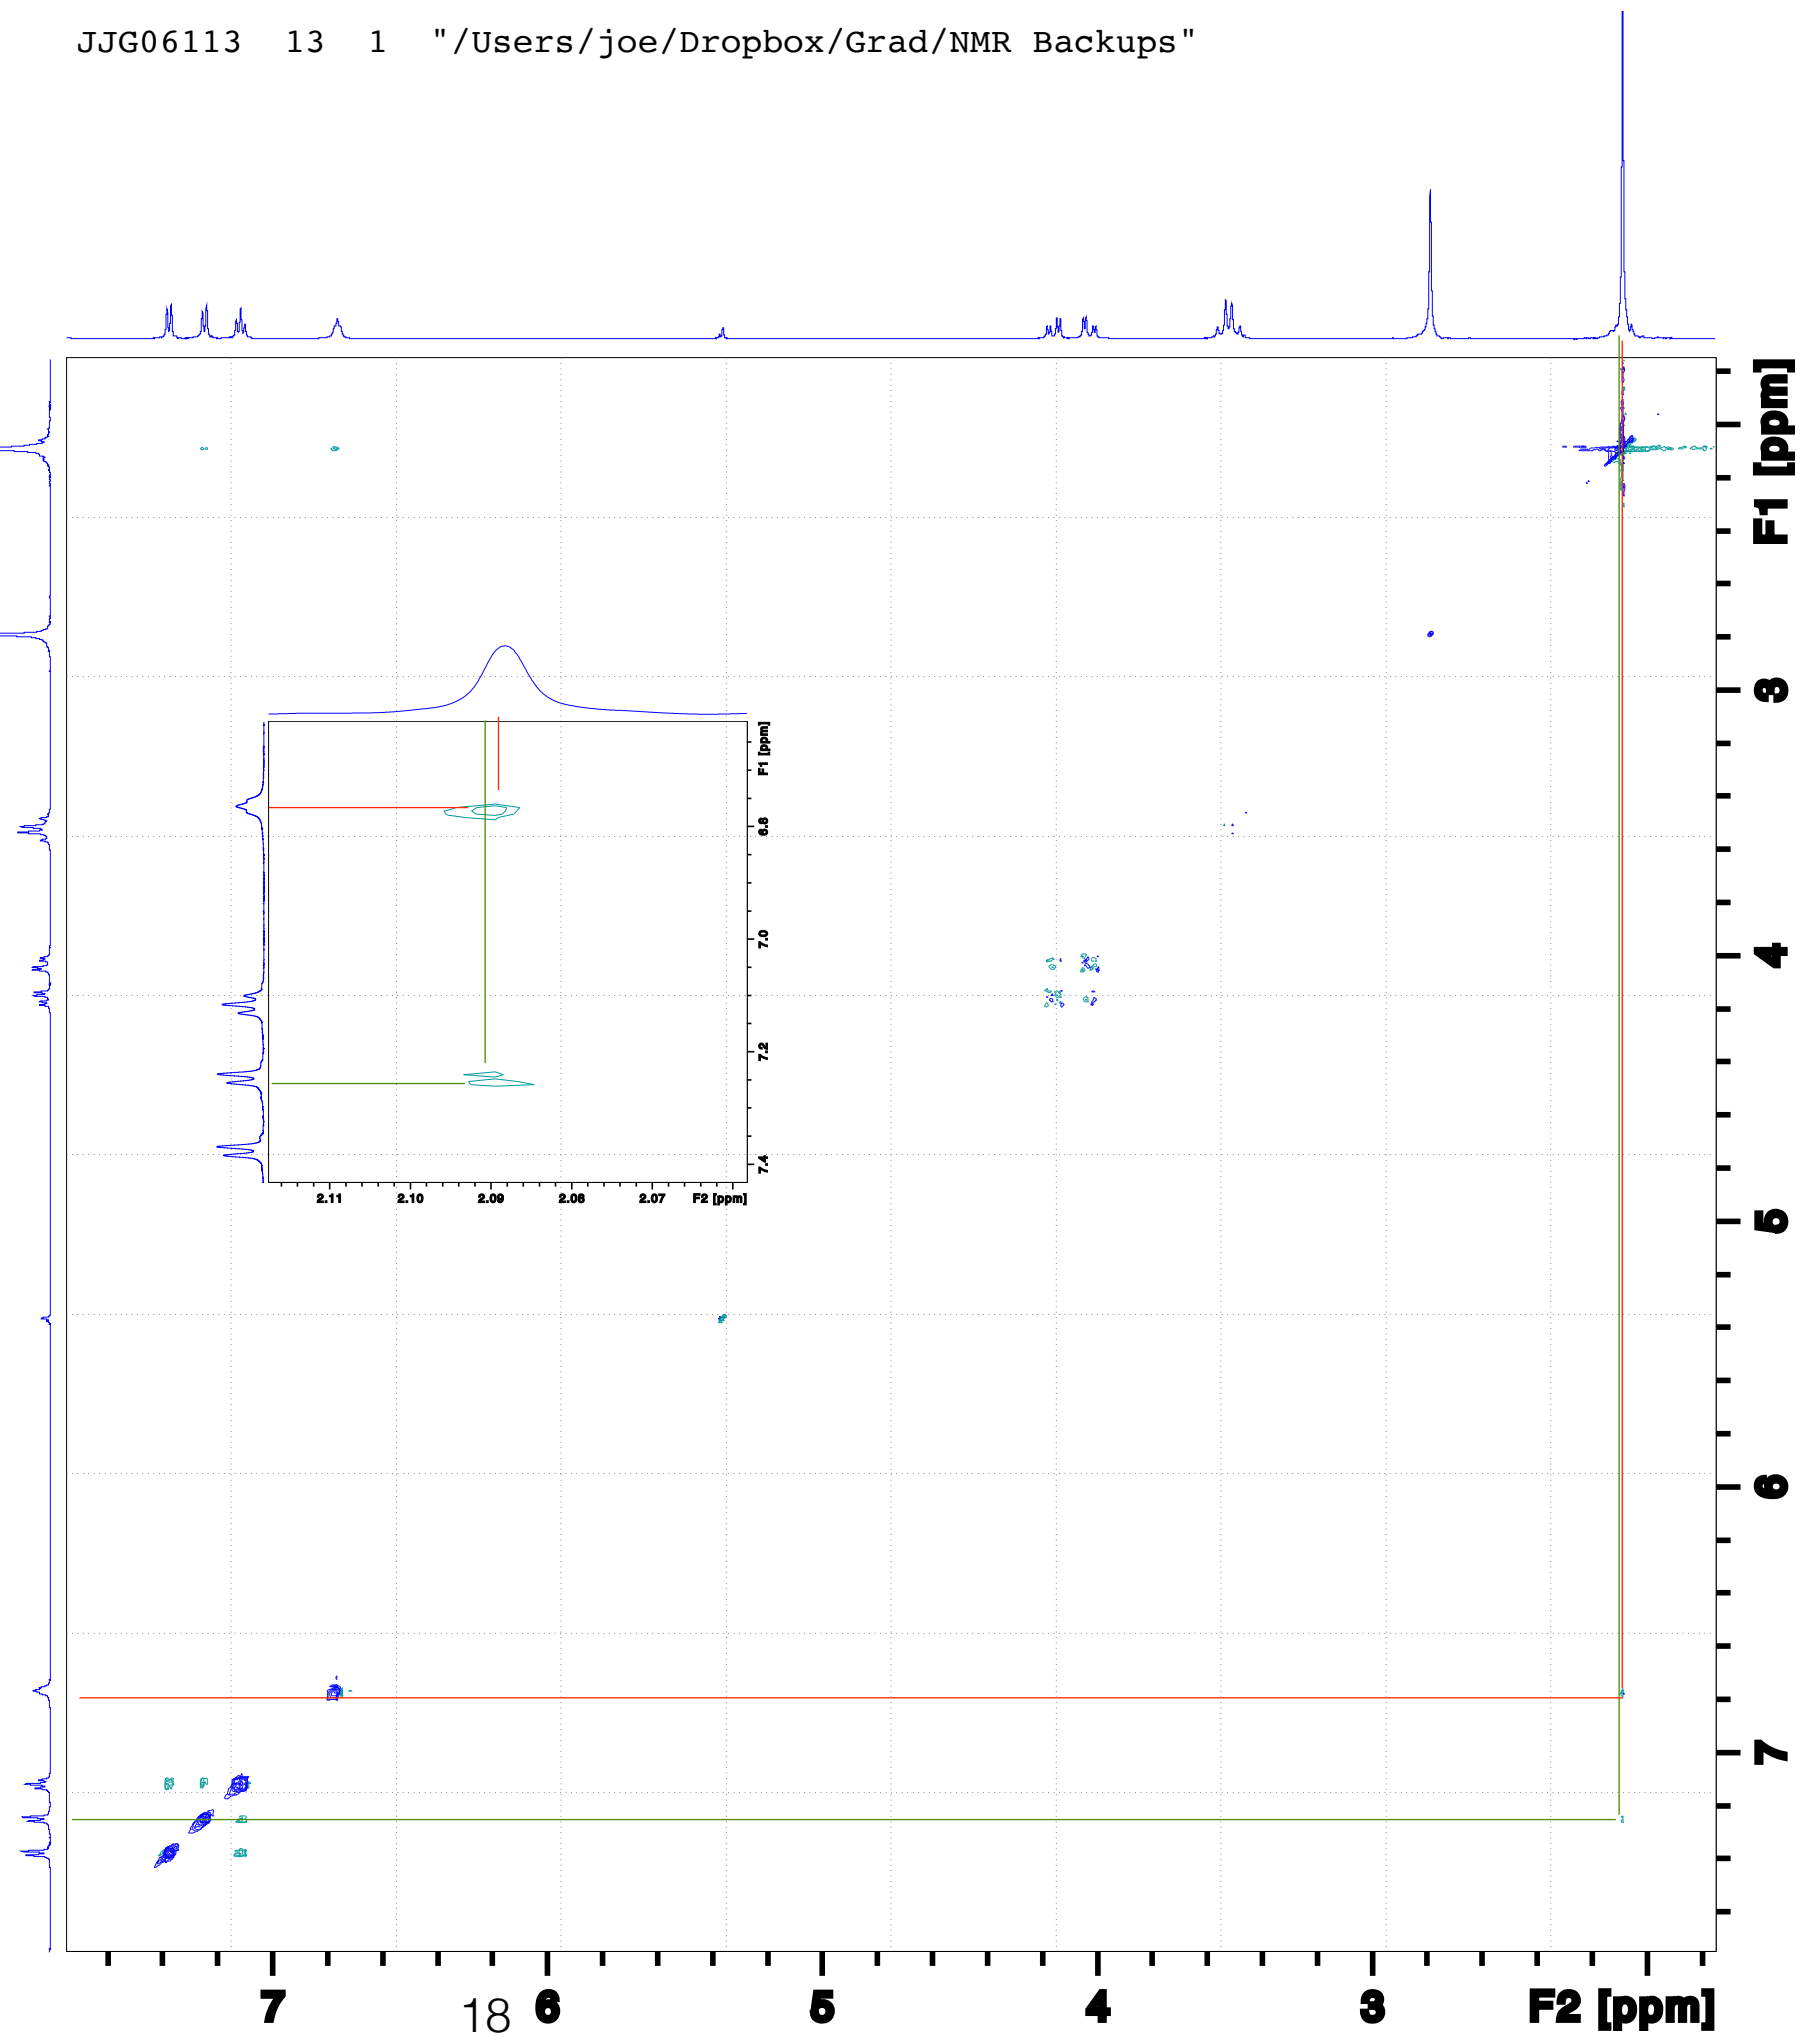

# $^{13}\text{C}$ [Pd(o-CF<sub>3</sub>-dmba)(NAc-Gly)]<sub>2</sub>

JJG06113 9 1 "/Users/joe/Dropbox/Grad/NMR Backups"

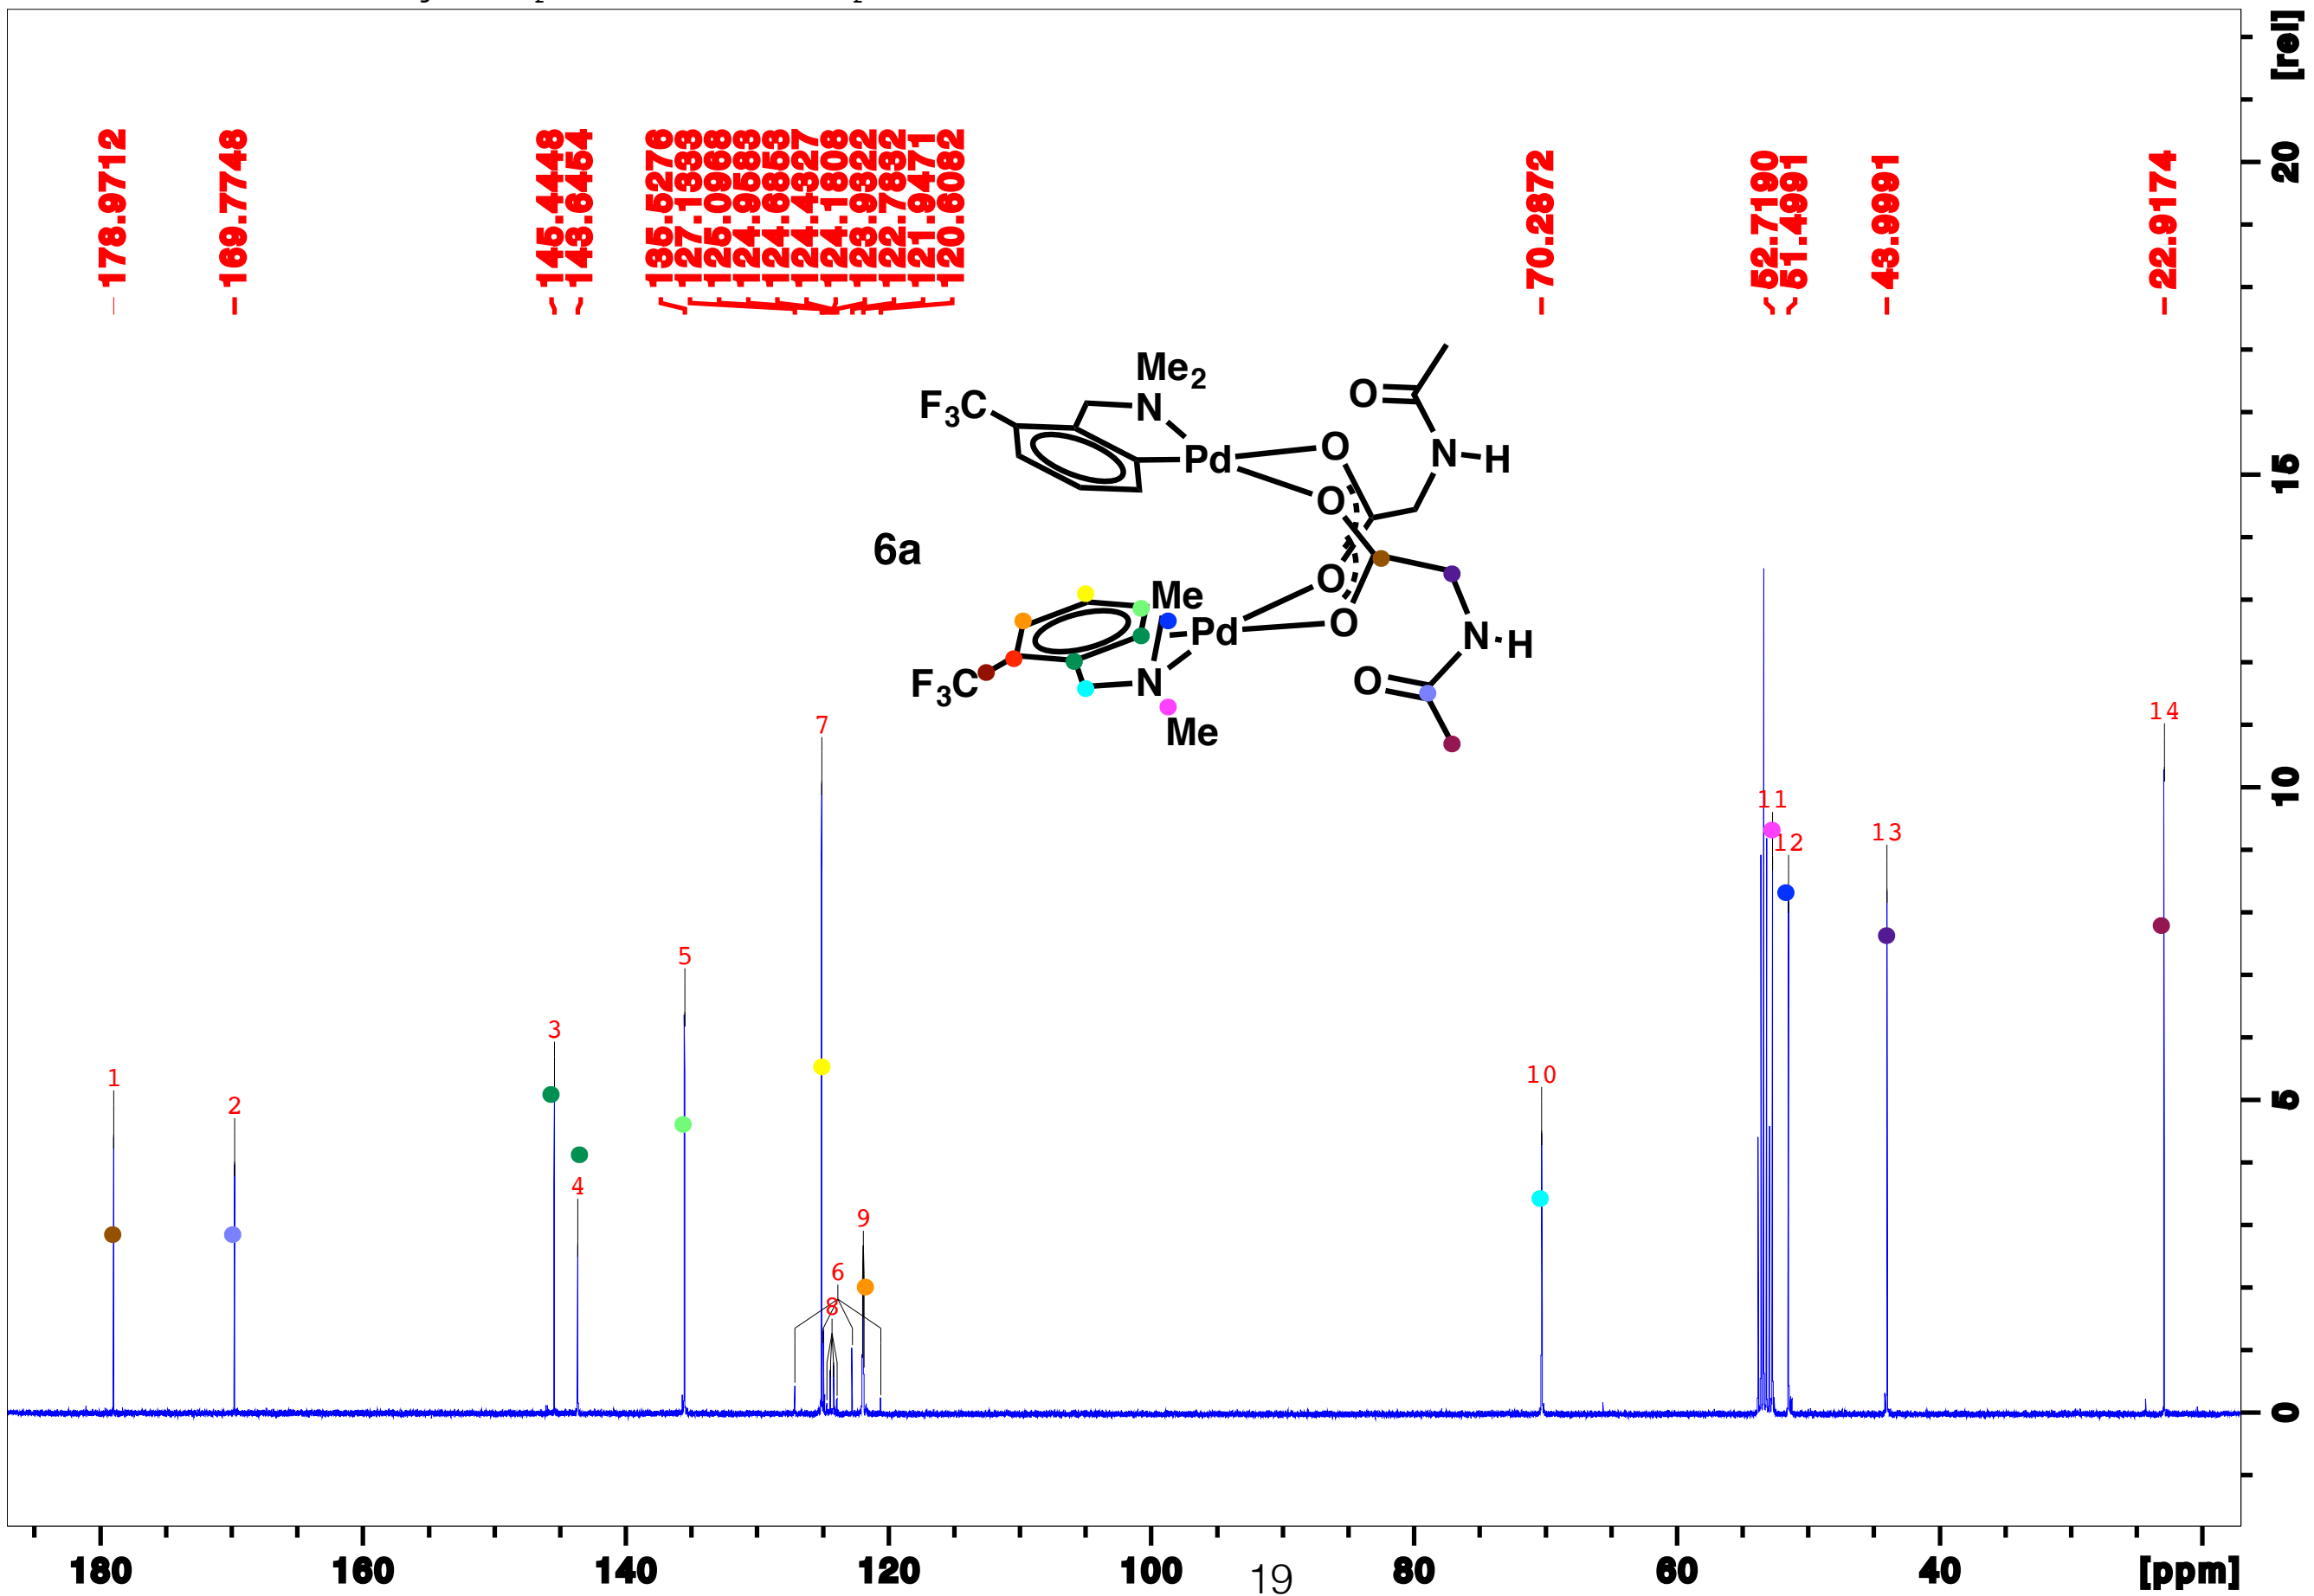

# $^{13}\text{C}$ aromatic region $[\text{Pd}(\text{o-CF}_3\text{-dmba})(\text{NAc-Gly})]_2$

JJG06113 9 1 "/Users/joe/Dropbox/Grad/NMR Backups"

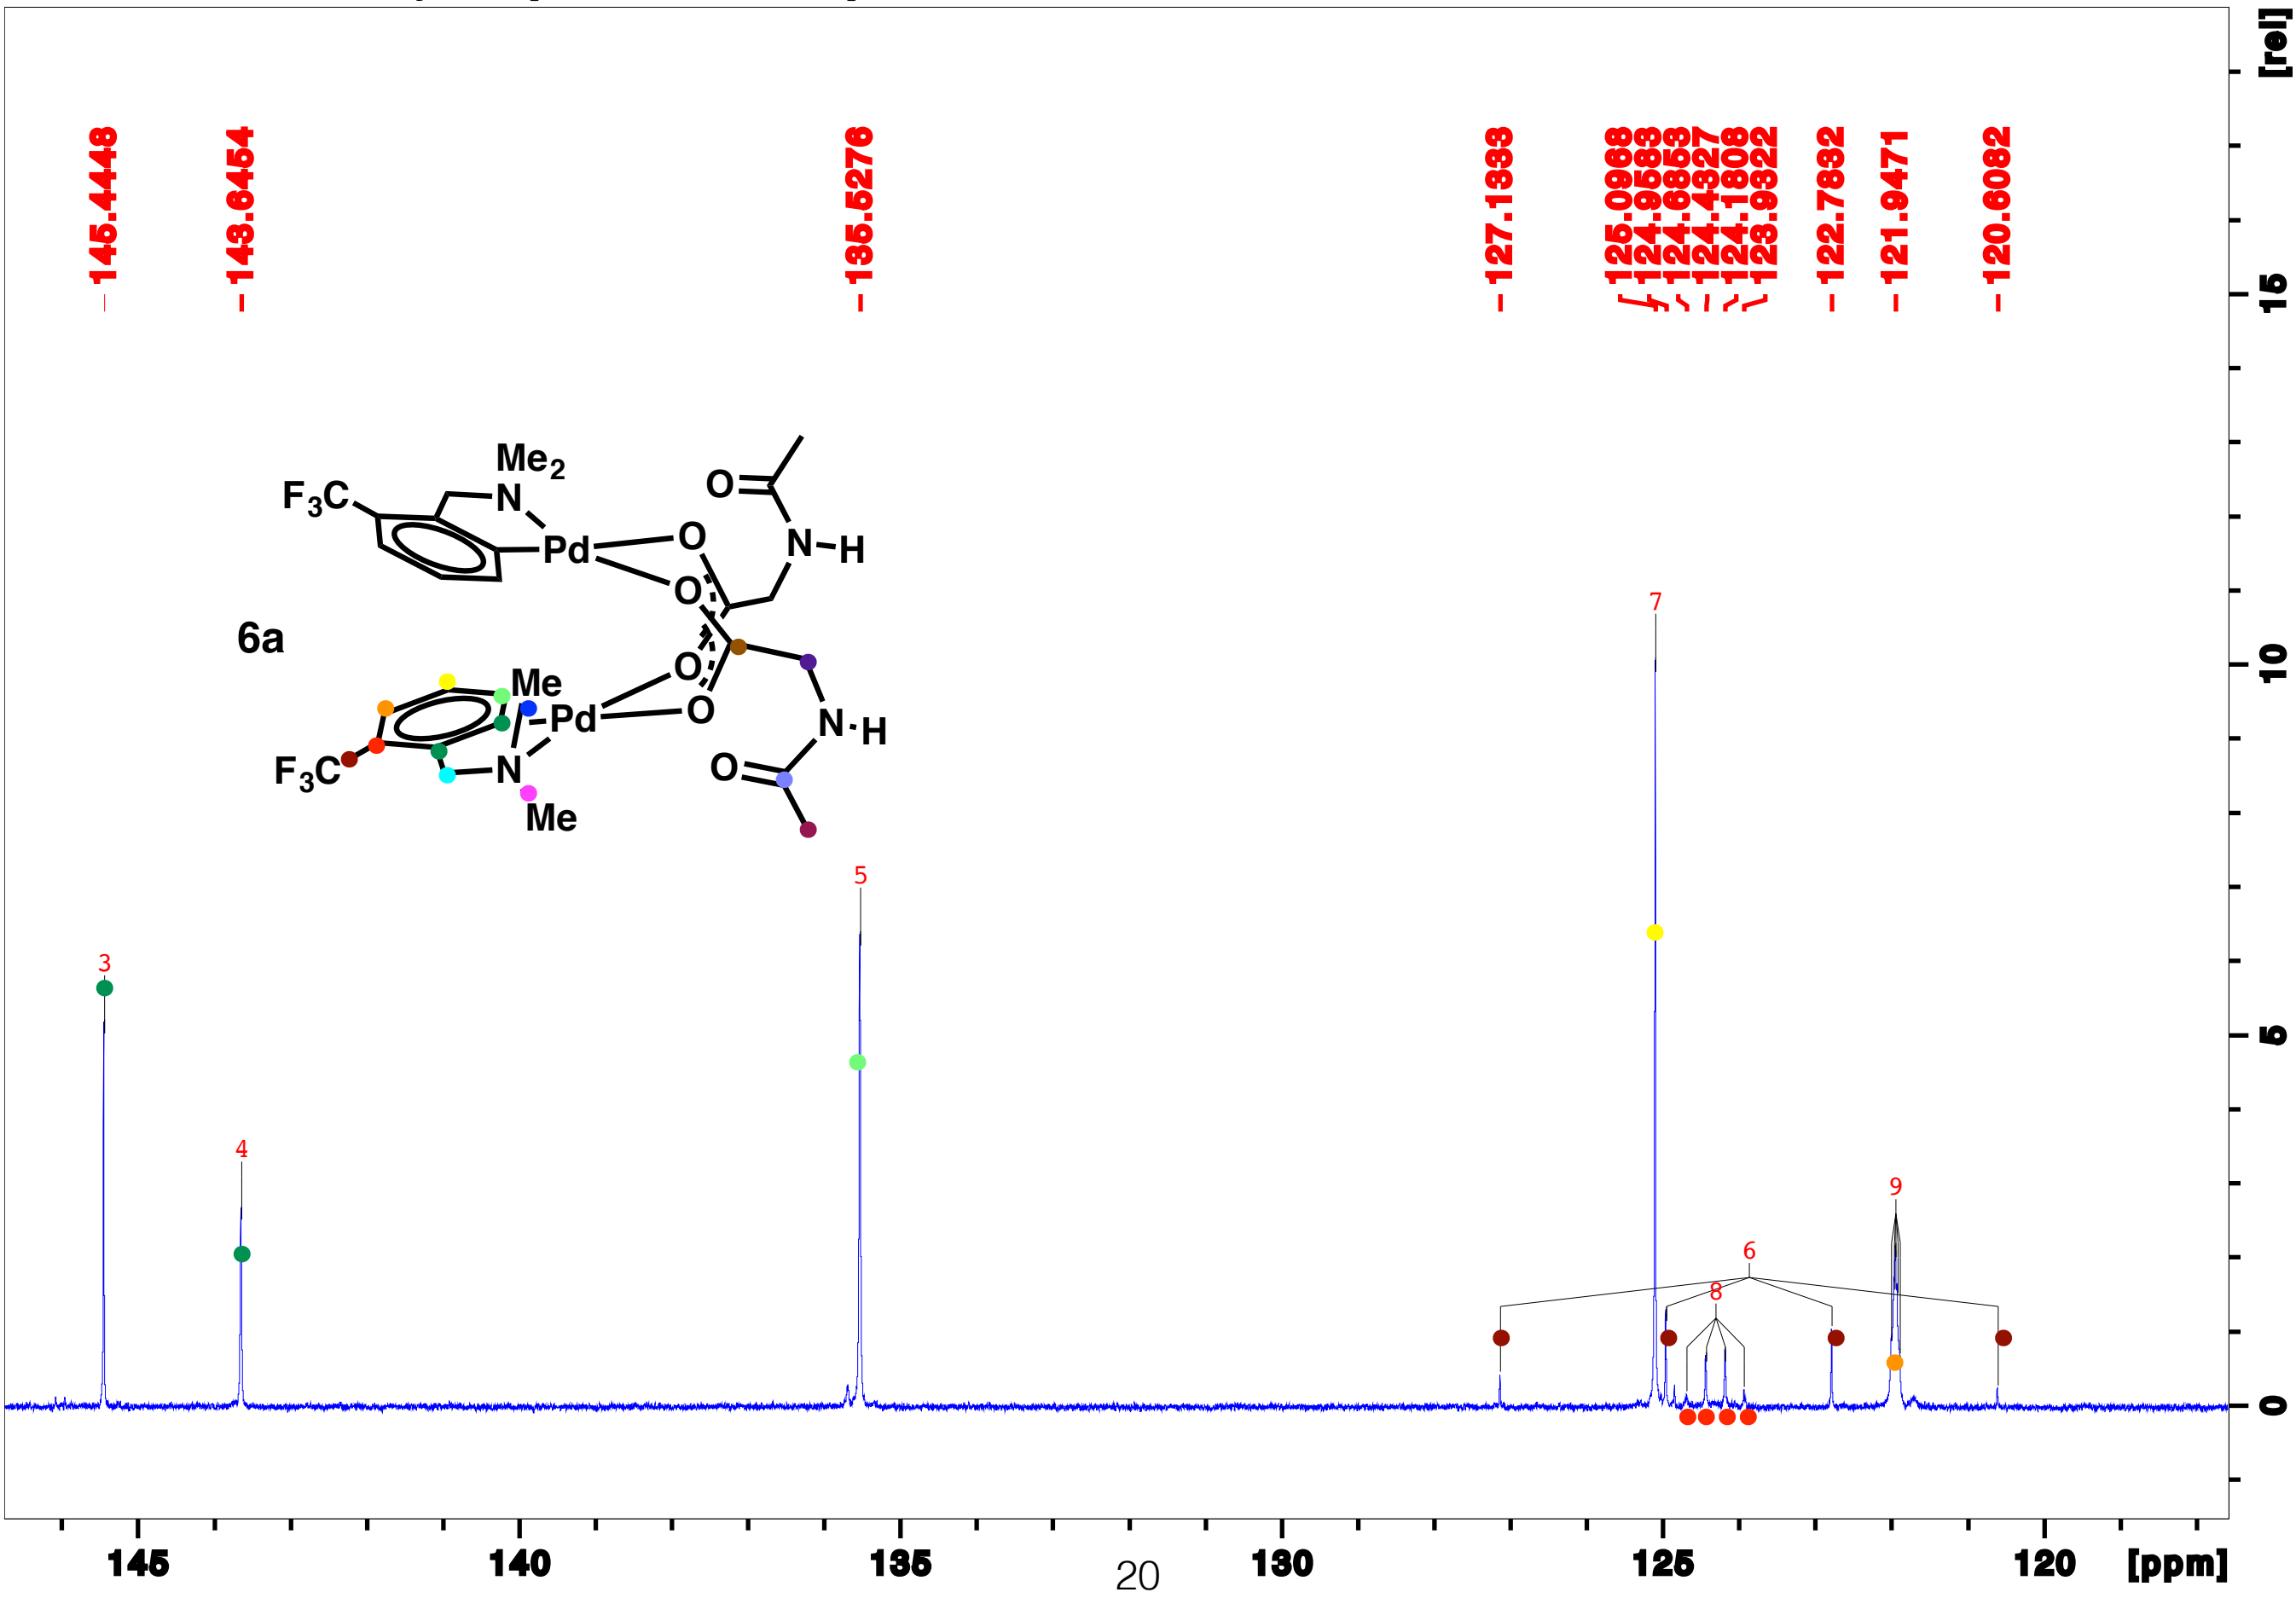



HMQC

JJG06113 10 1 "/Users/joe/Dropbox/Grad/NMR Backups"

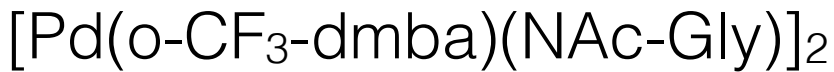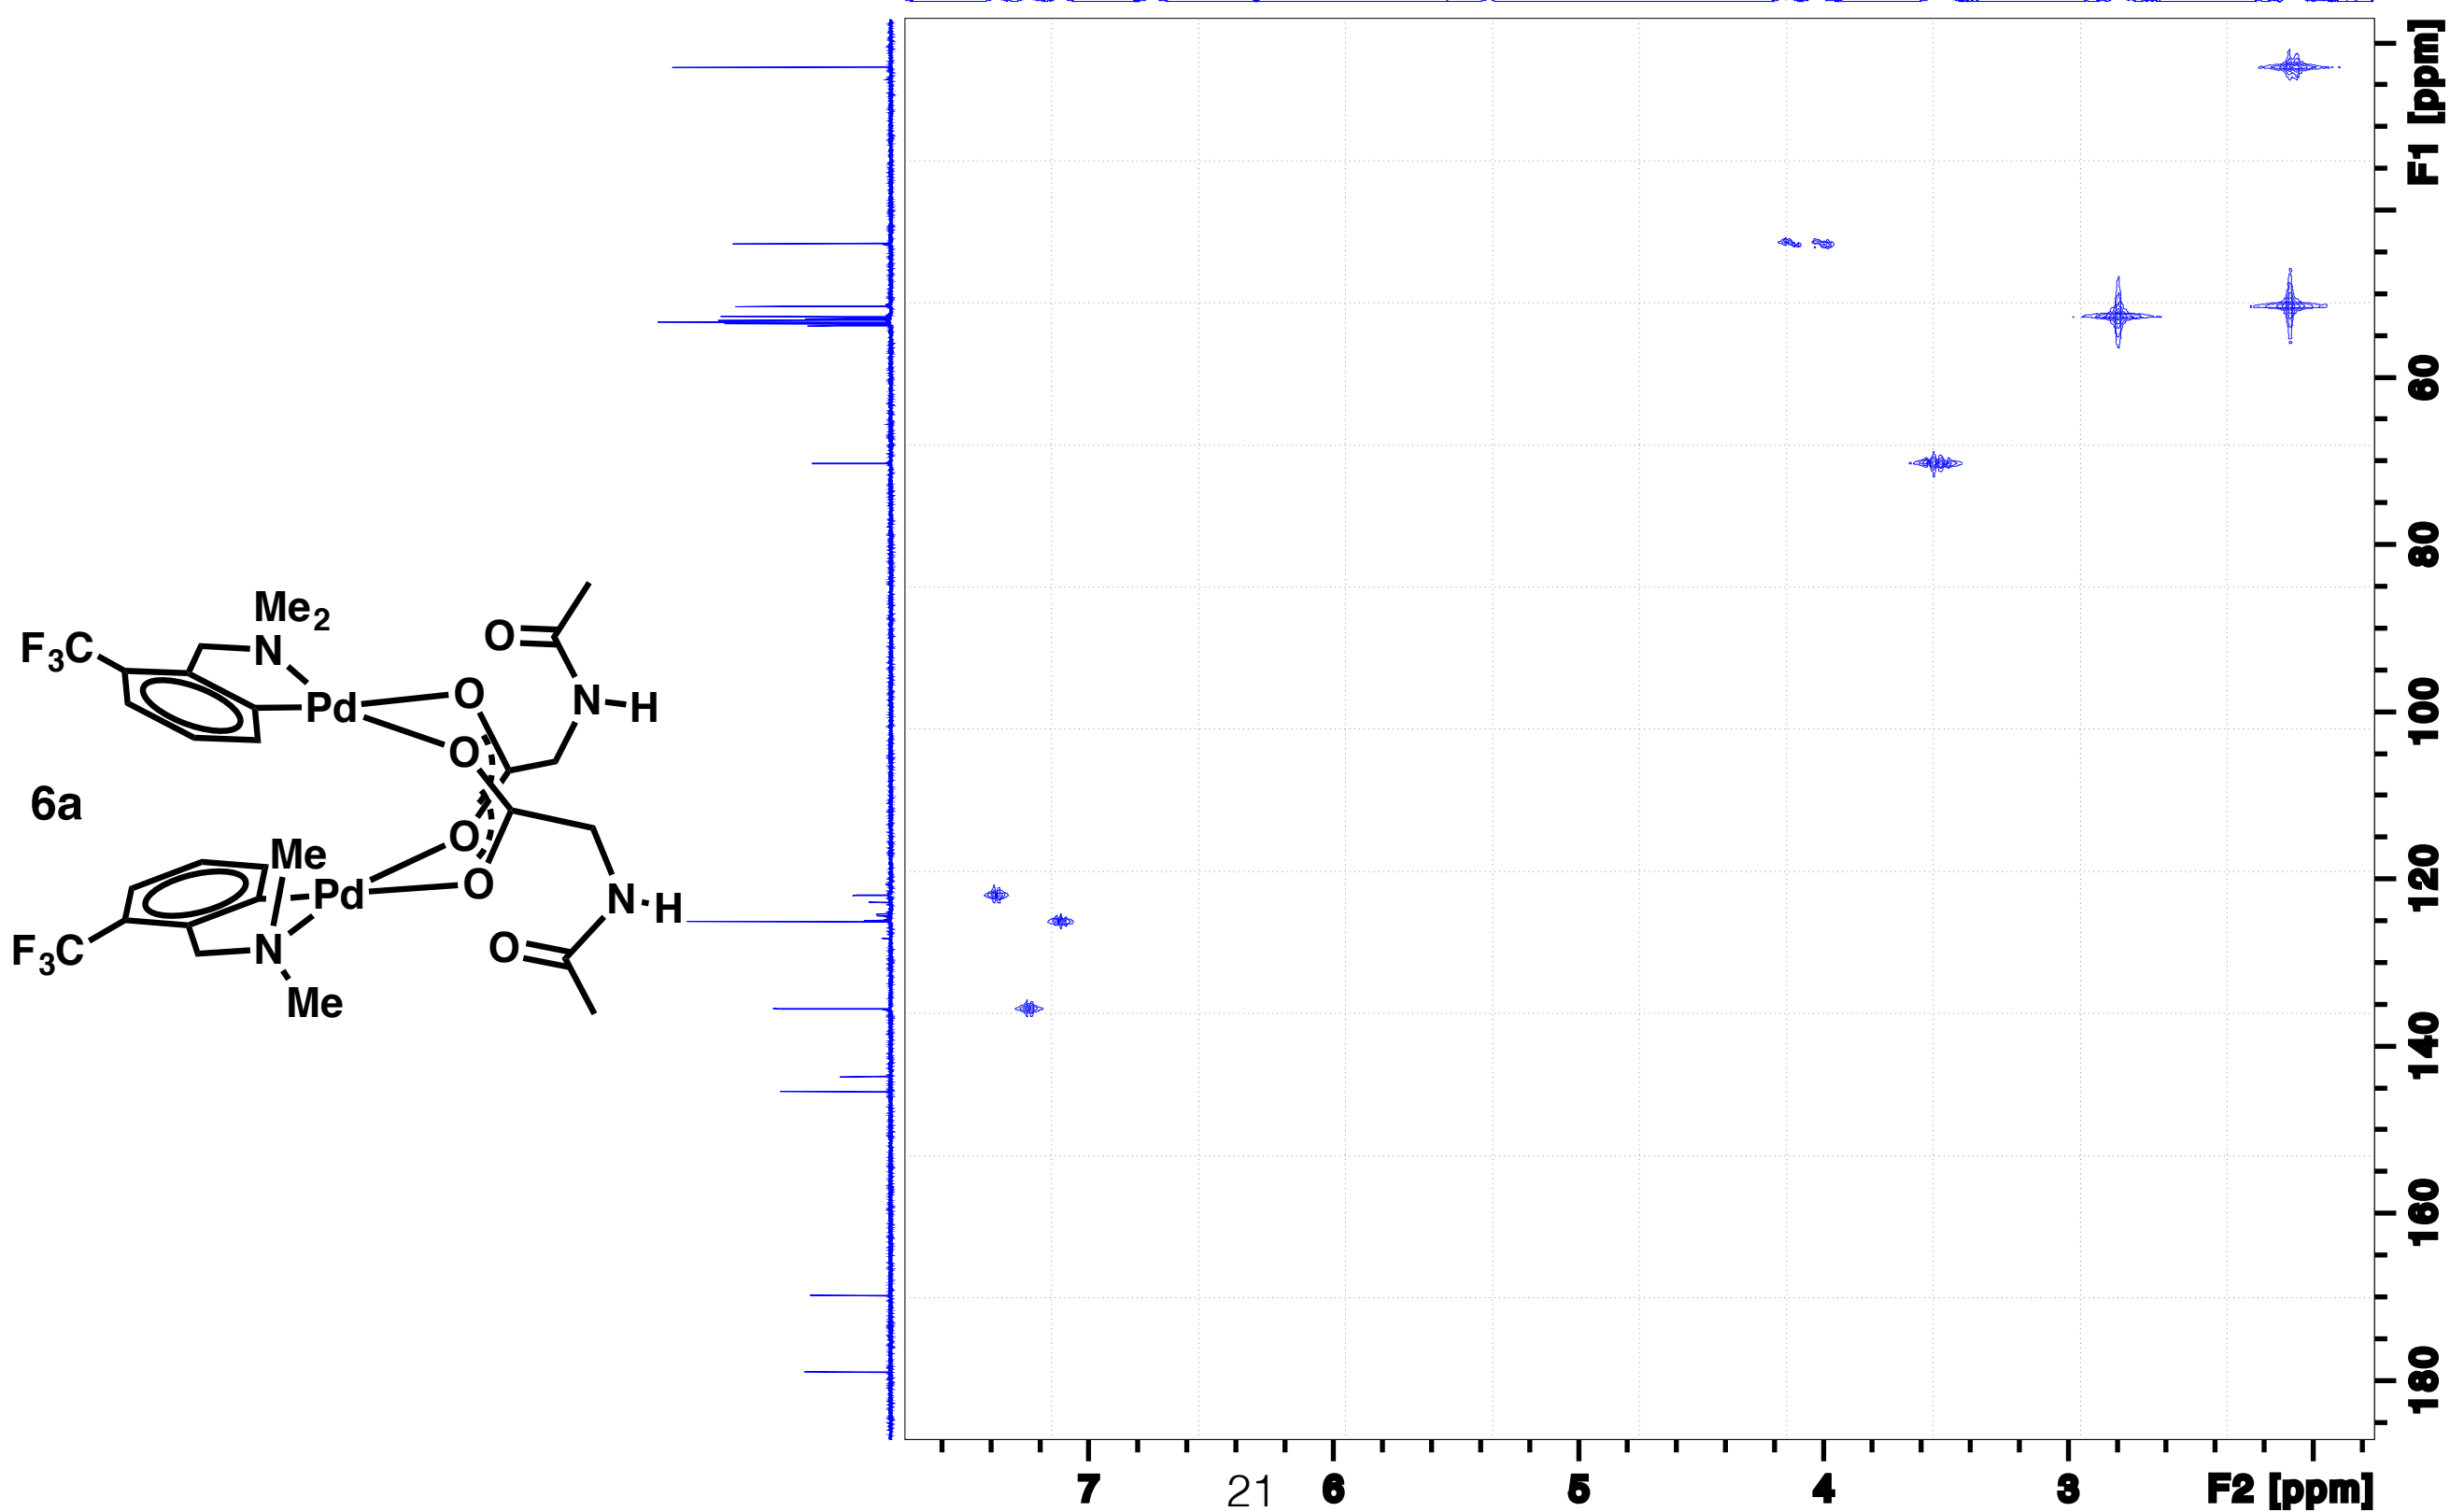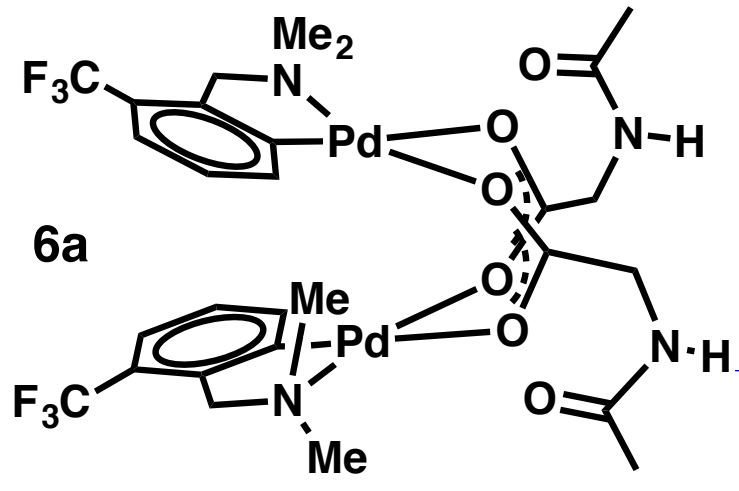

19F

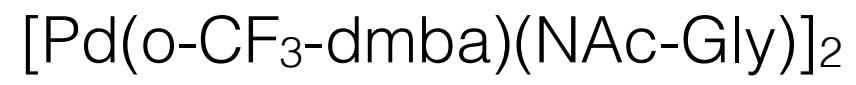

JJG06113 2 1 "/Users/joe/Dropbox/Grad/NMR Backups"

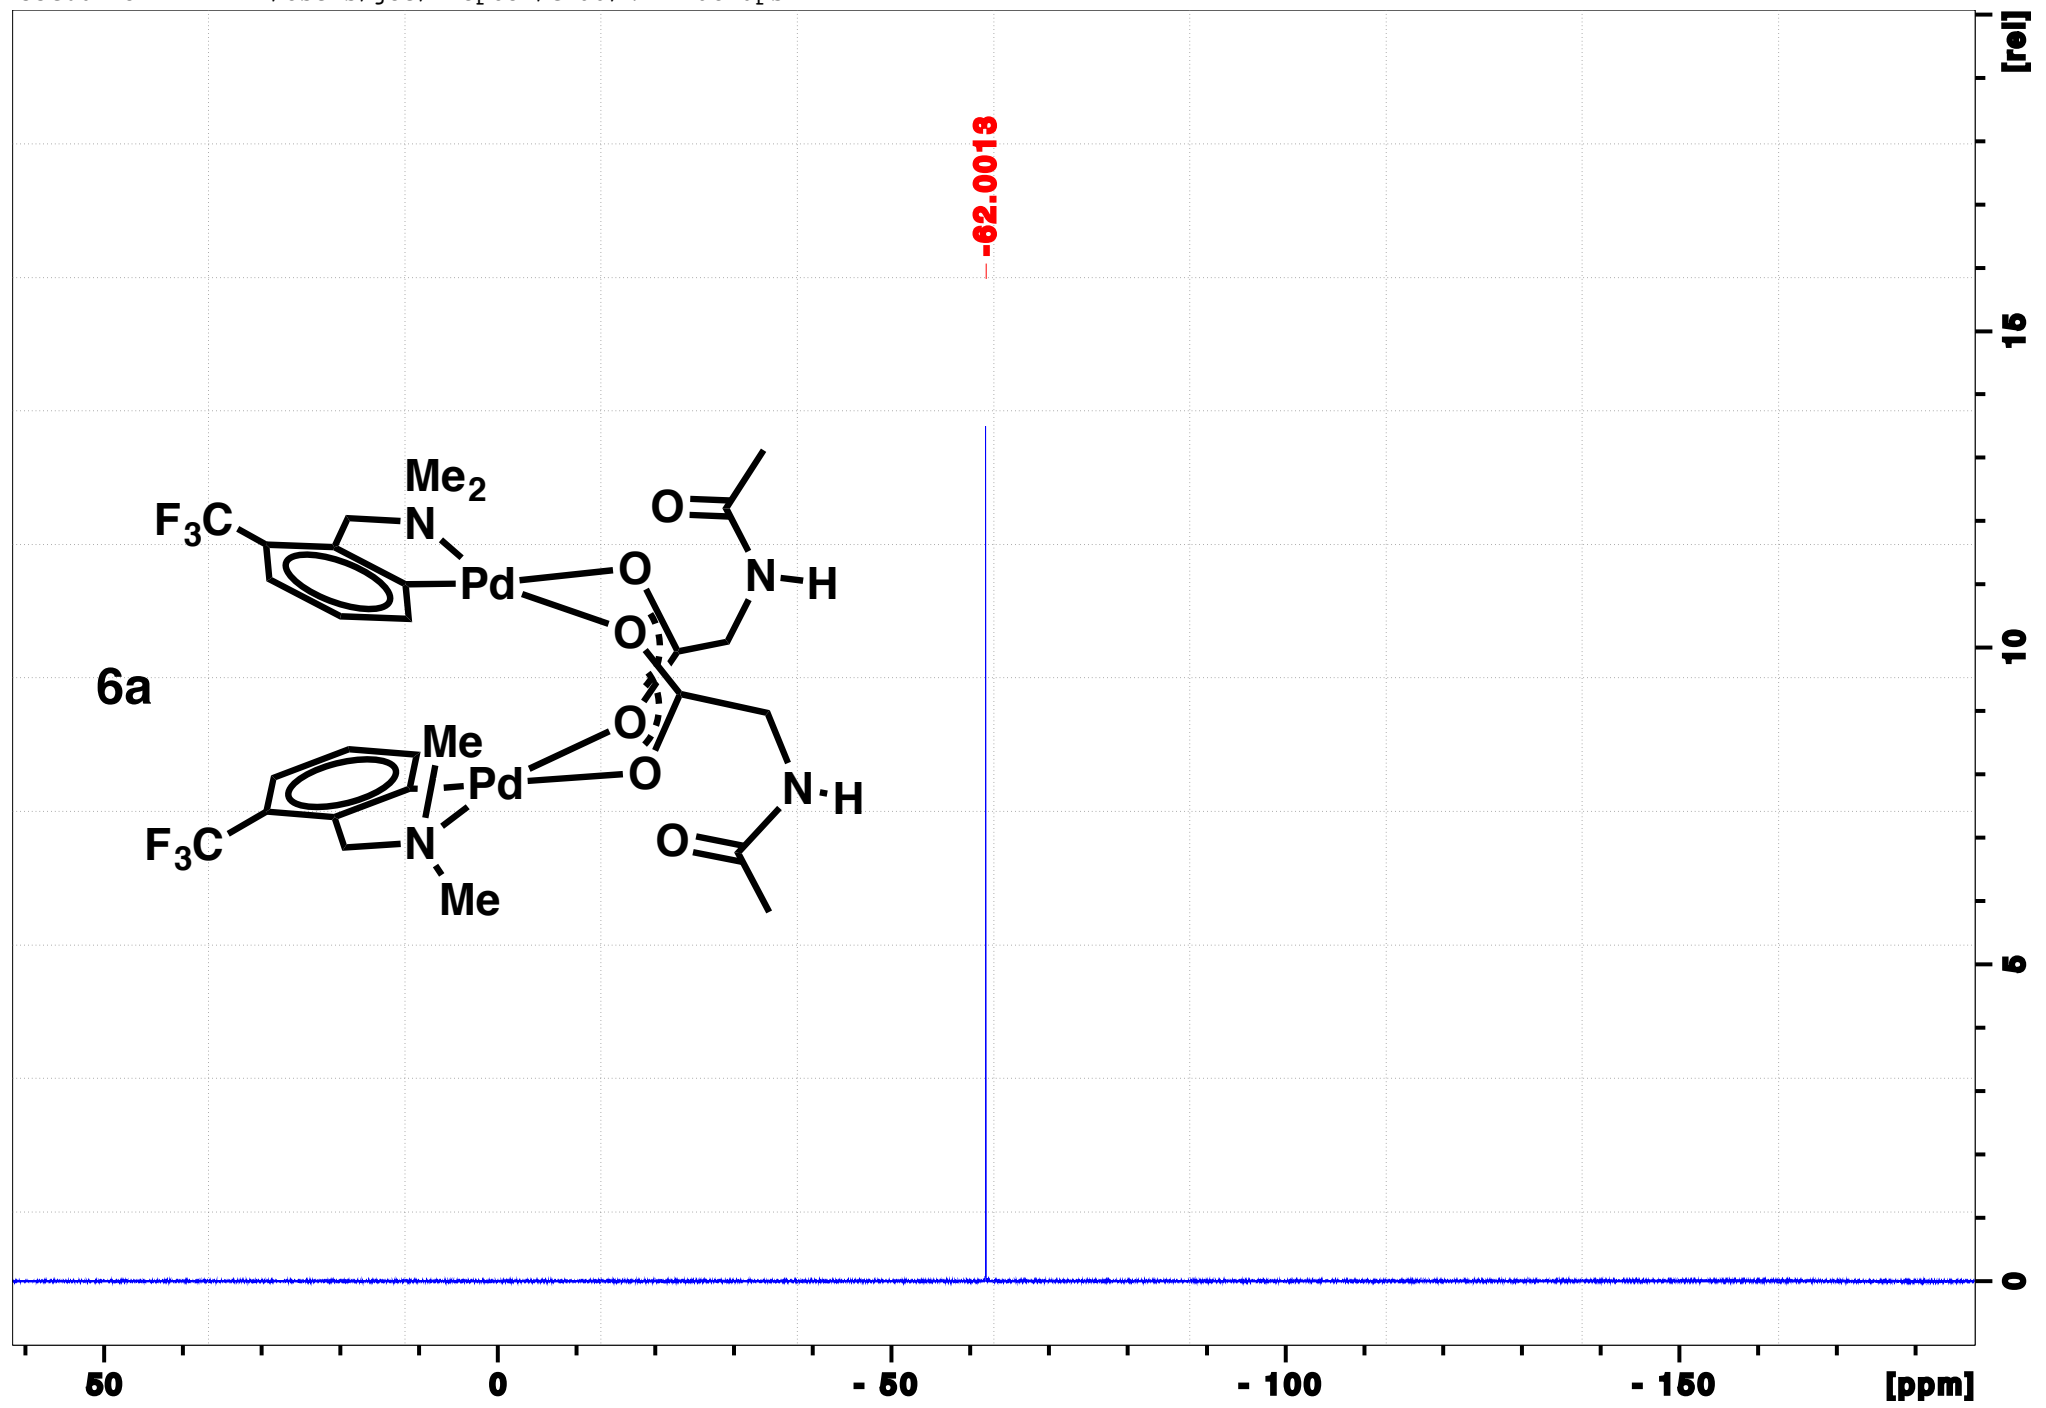

$^1\text{H}$  **6b**

7.251  
7.236  
7.179  
7.164  
7.118  
7.102  
7.085  
7.069

6.285  
6.272  
6.249  
6.235

4.480  
4.466  
4.452  
4.444  
4.437  
4.423  
4.418  
4.404  
4.390  
4.381  
4.375  
4.361  
3.572  
3.543  
3.523  
3.512  
3.495  
3.482

2.813  
2.806

2.073  
2.055  
2.037  
2.000

1.345  
1.333  
1.319

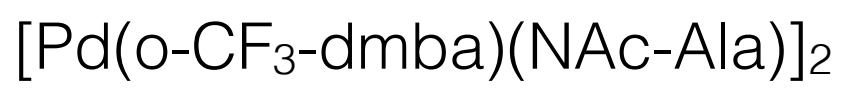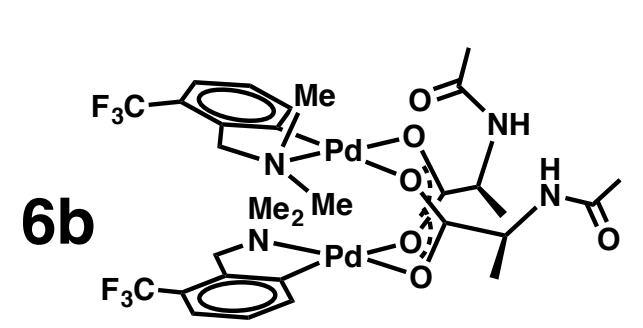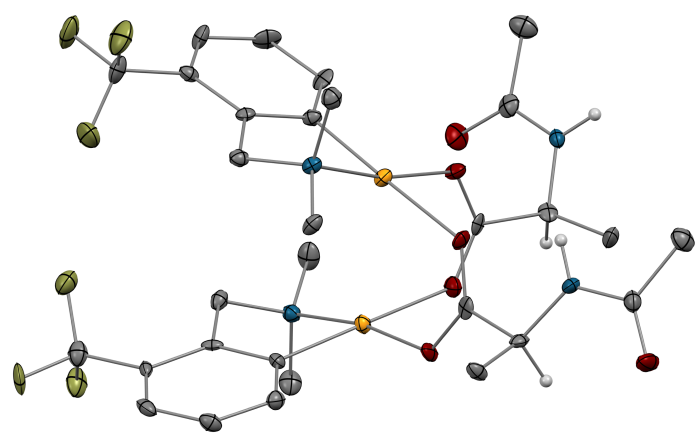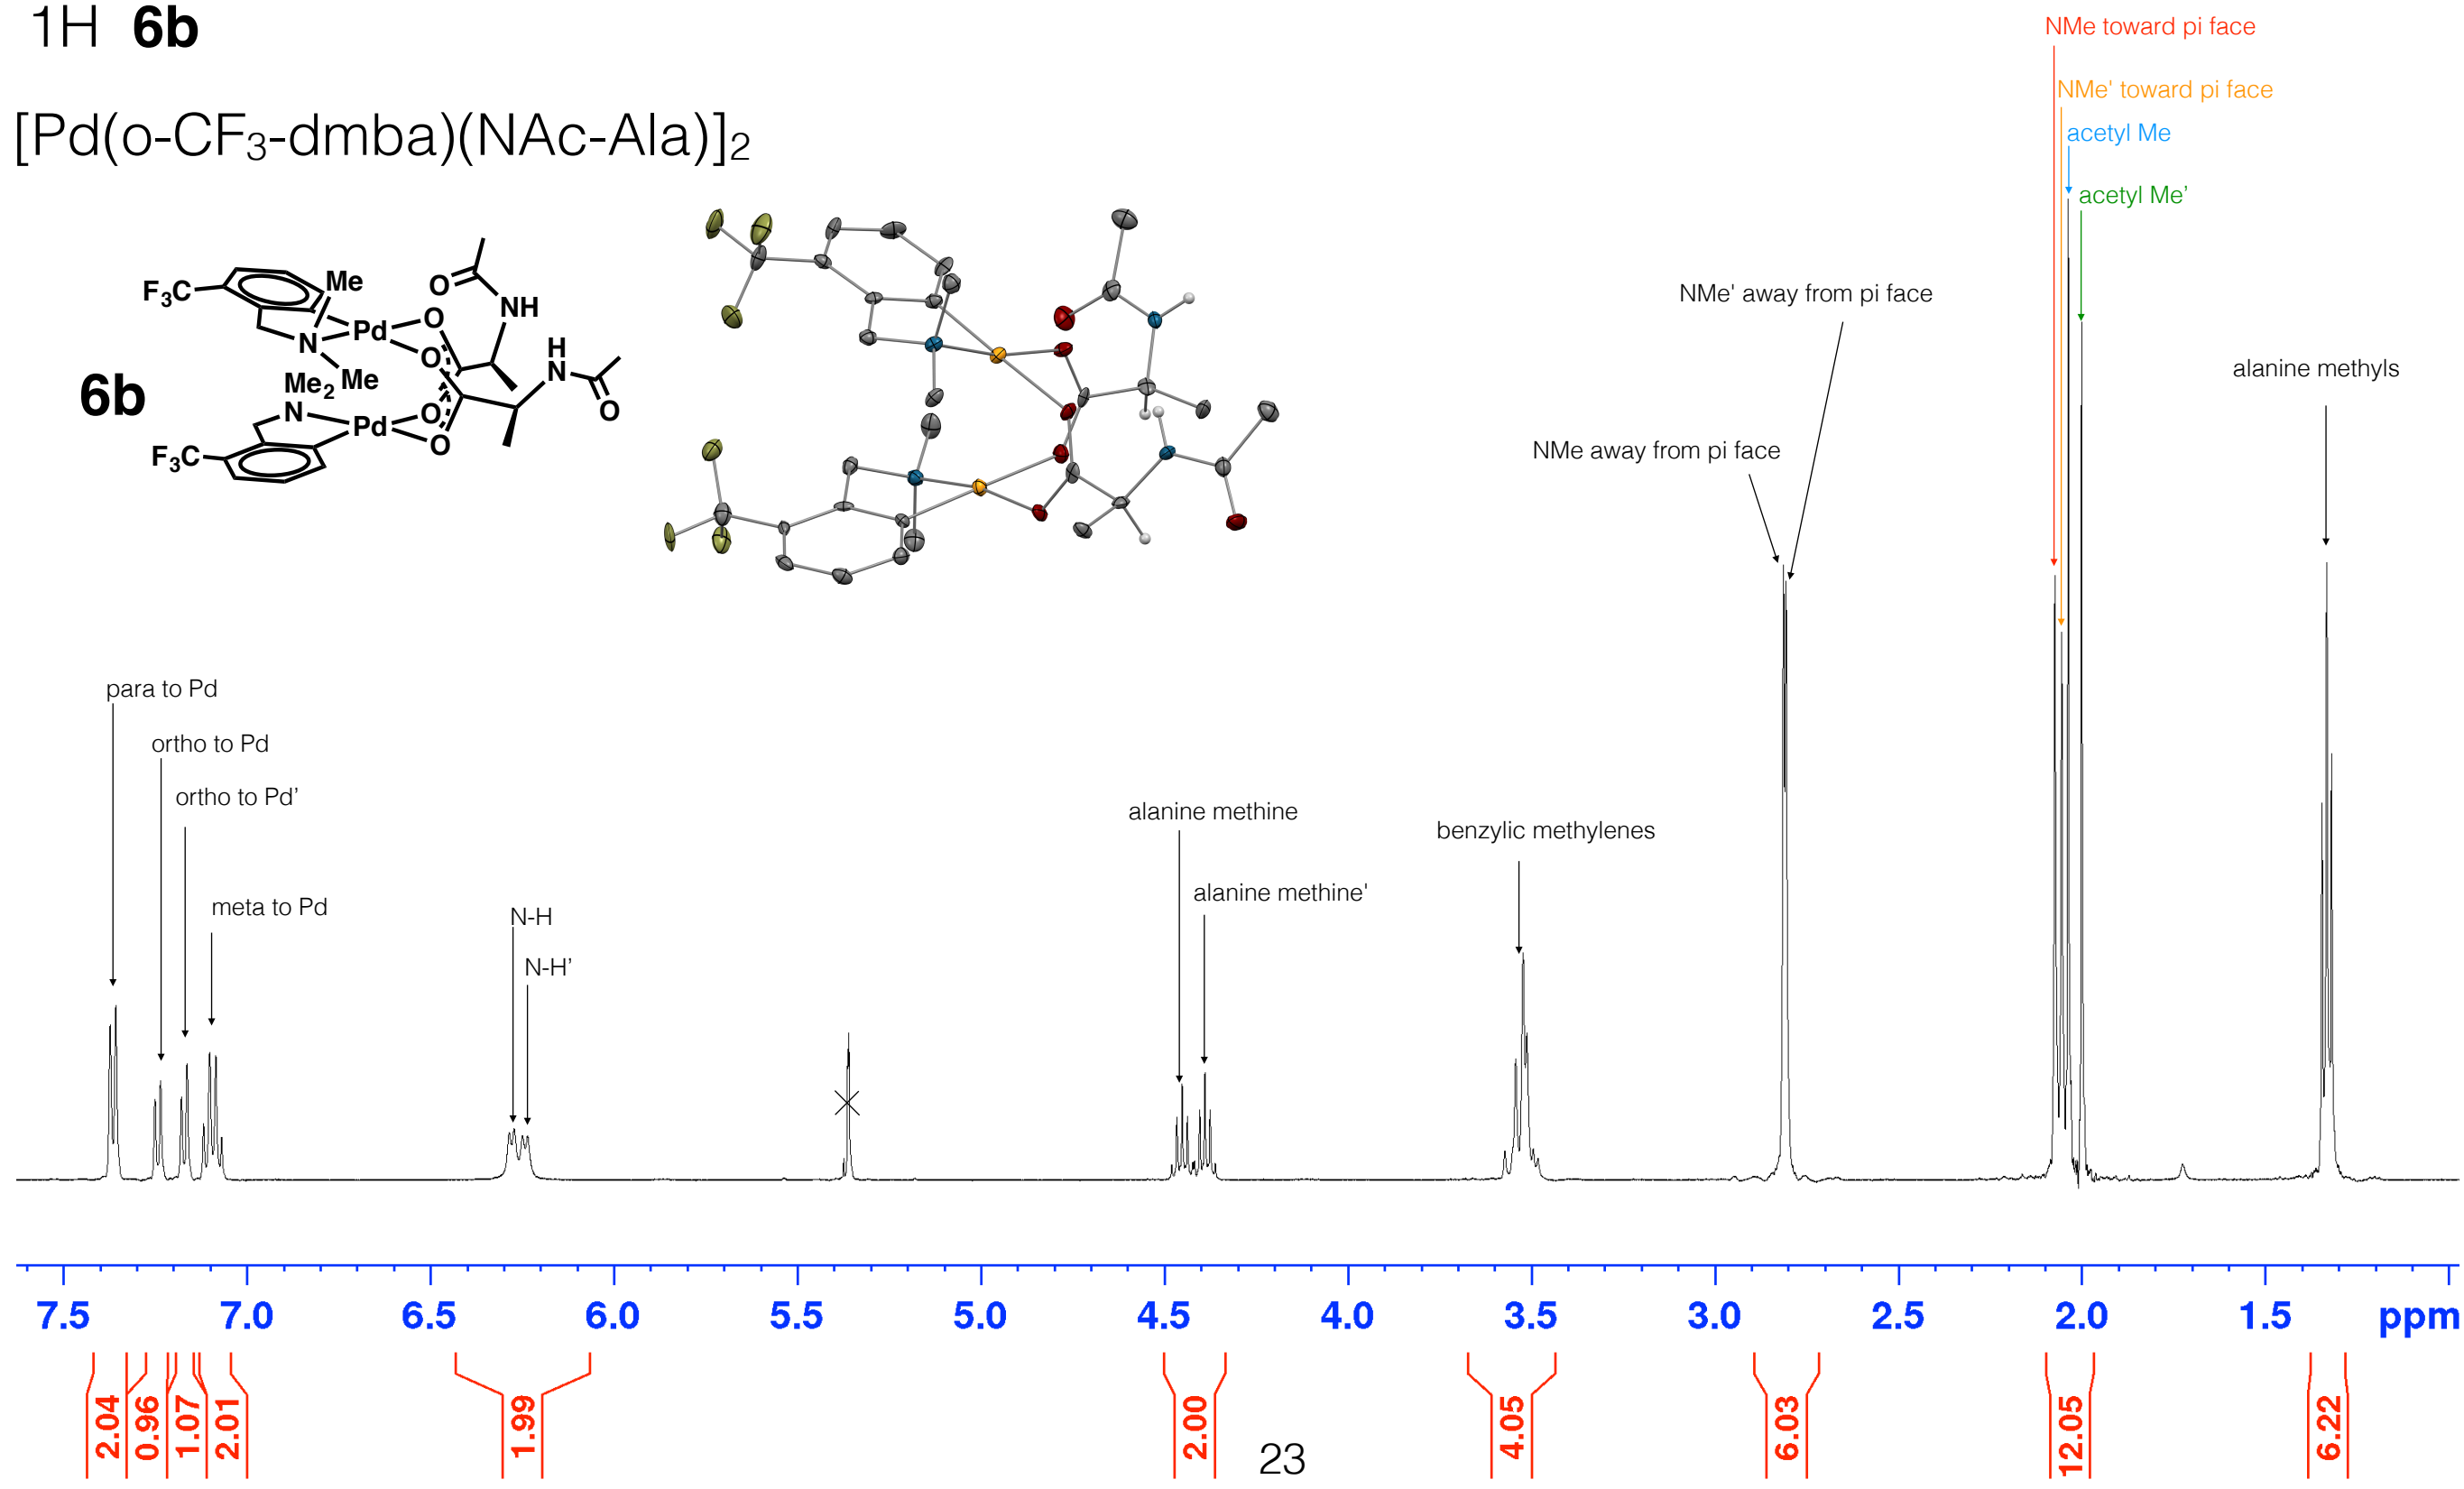

COSY Full

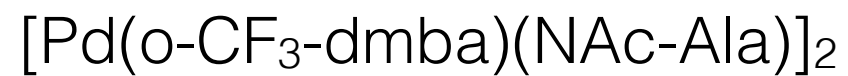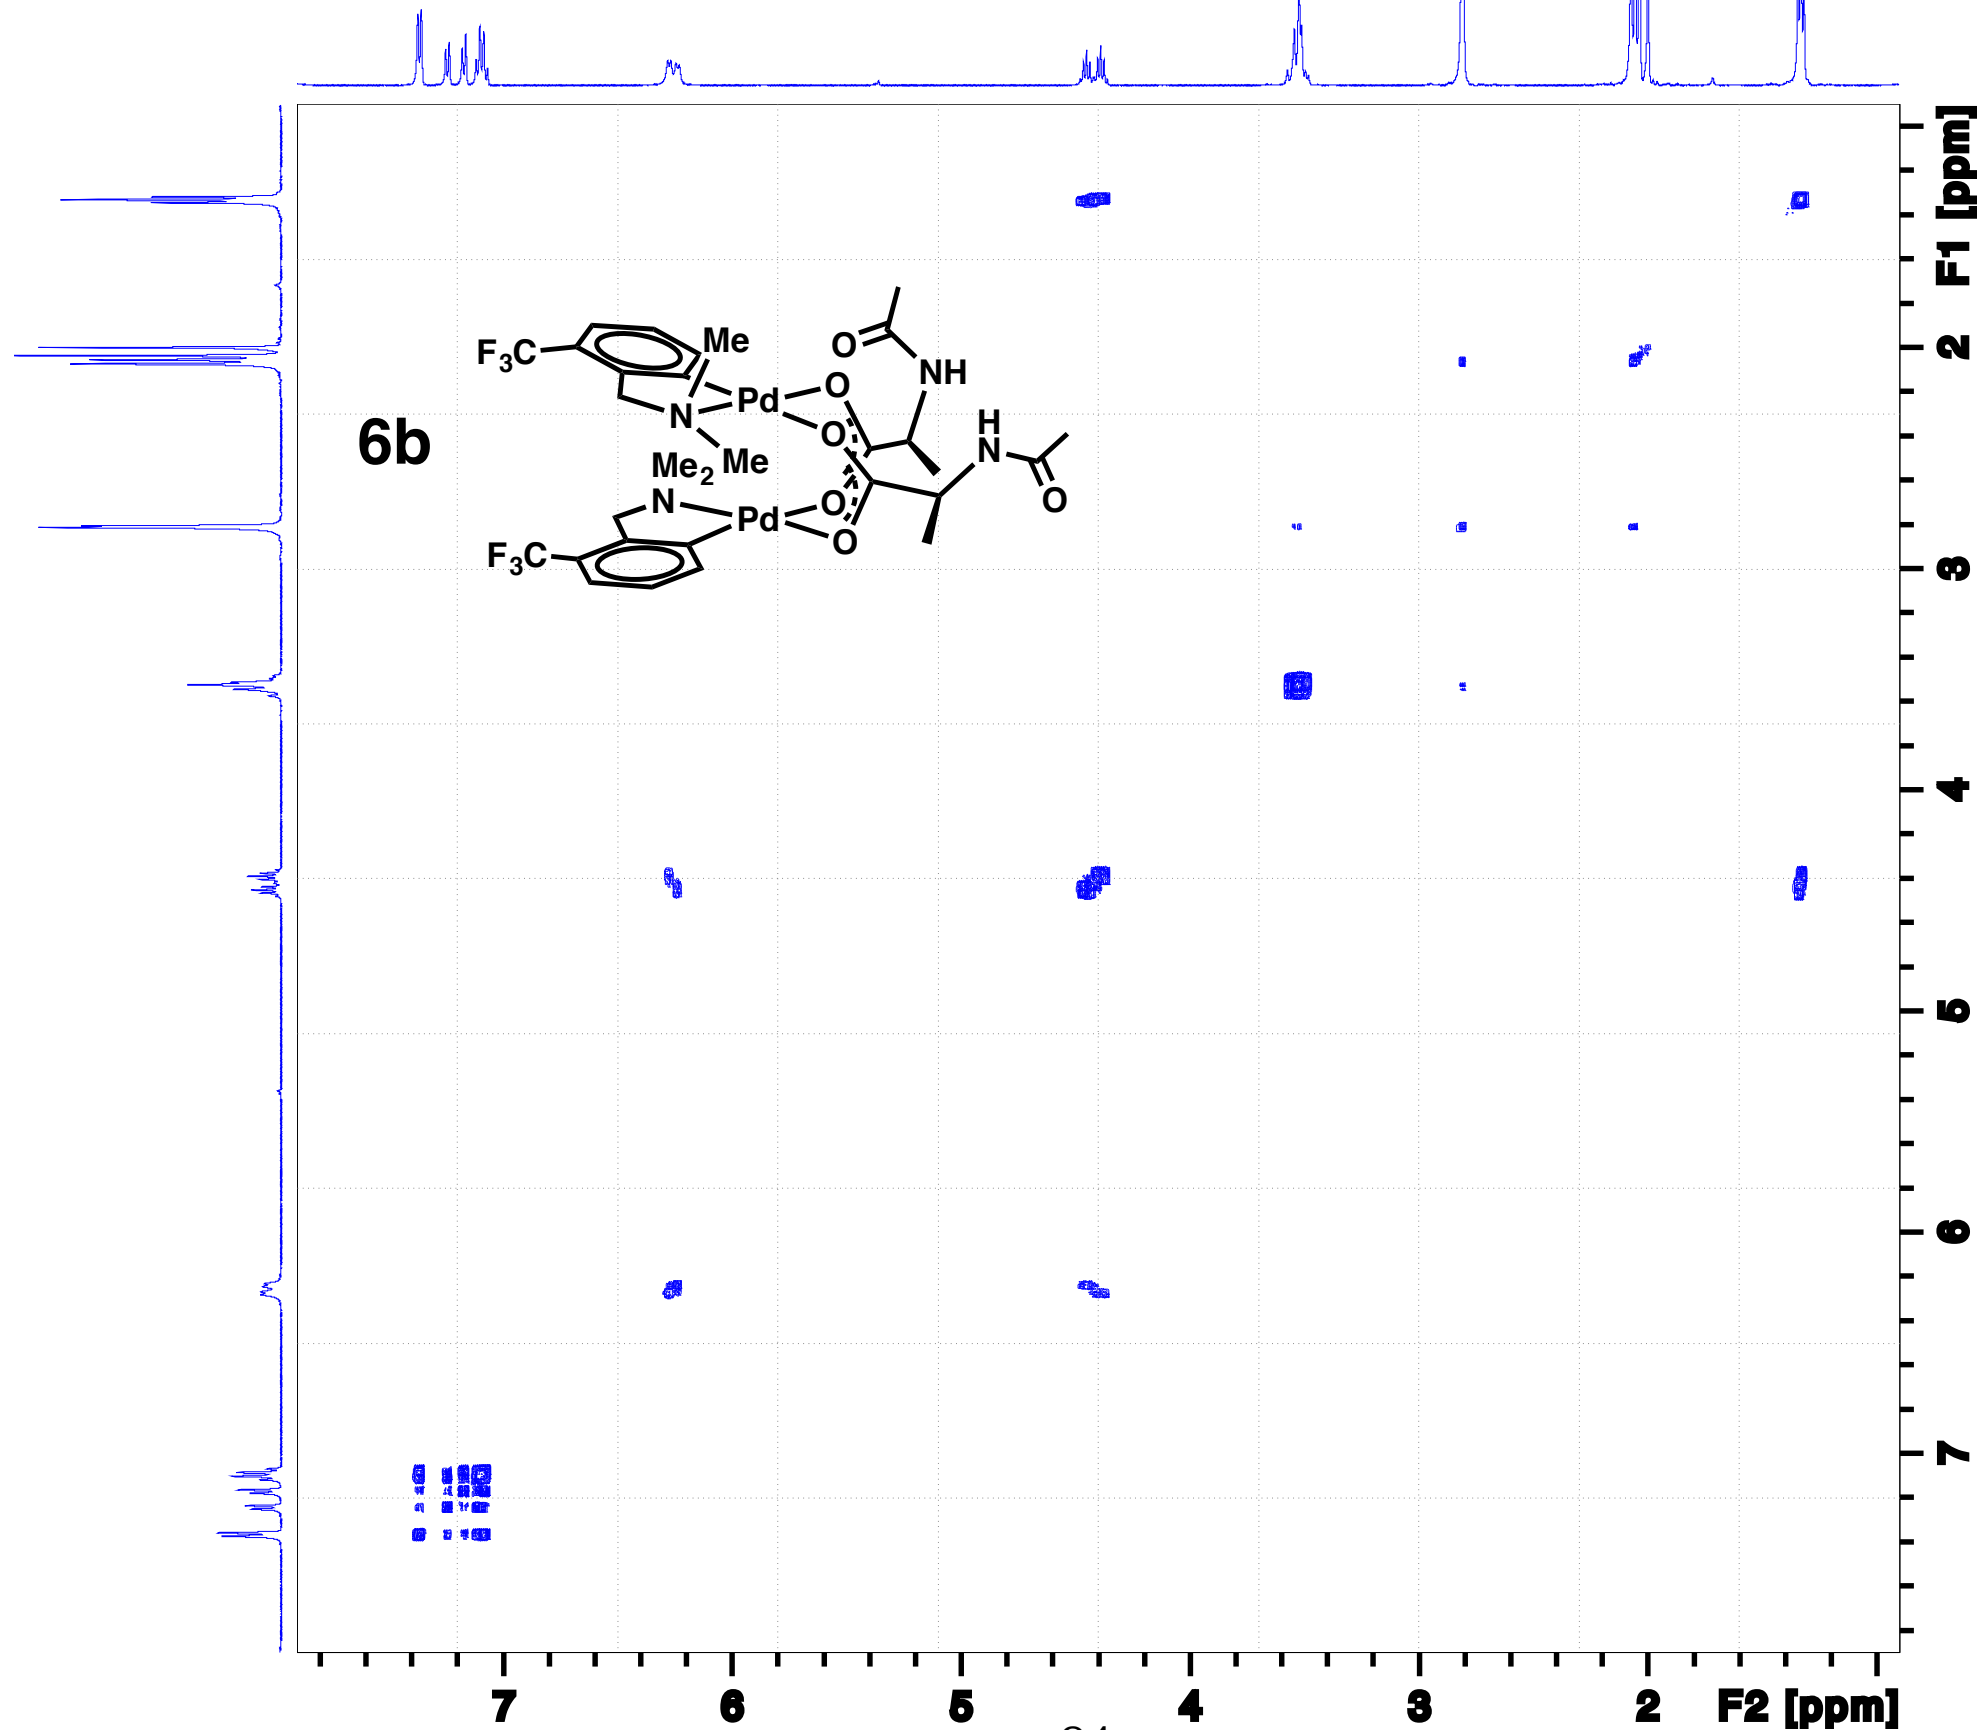

# COSY aromatic

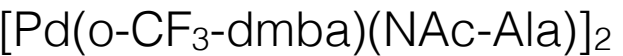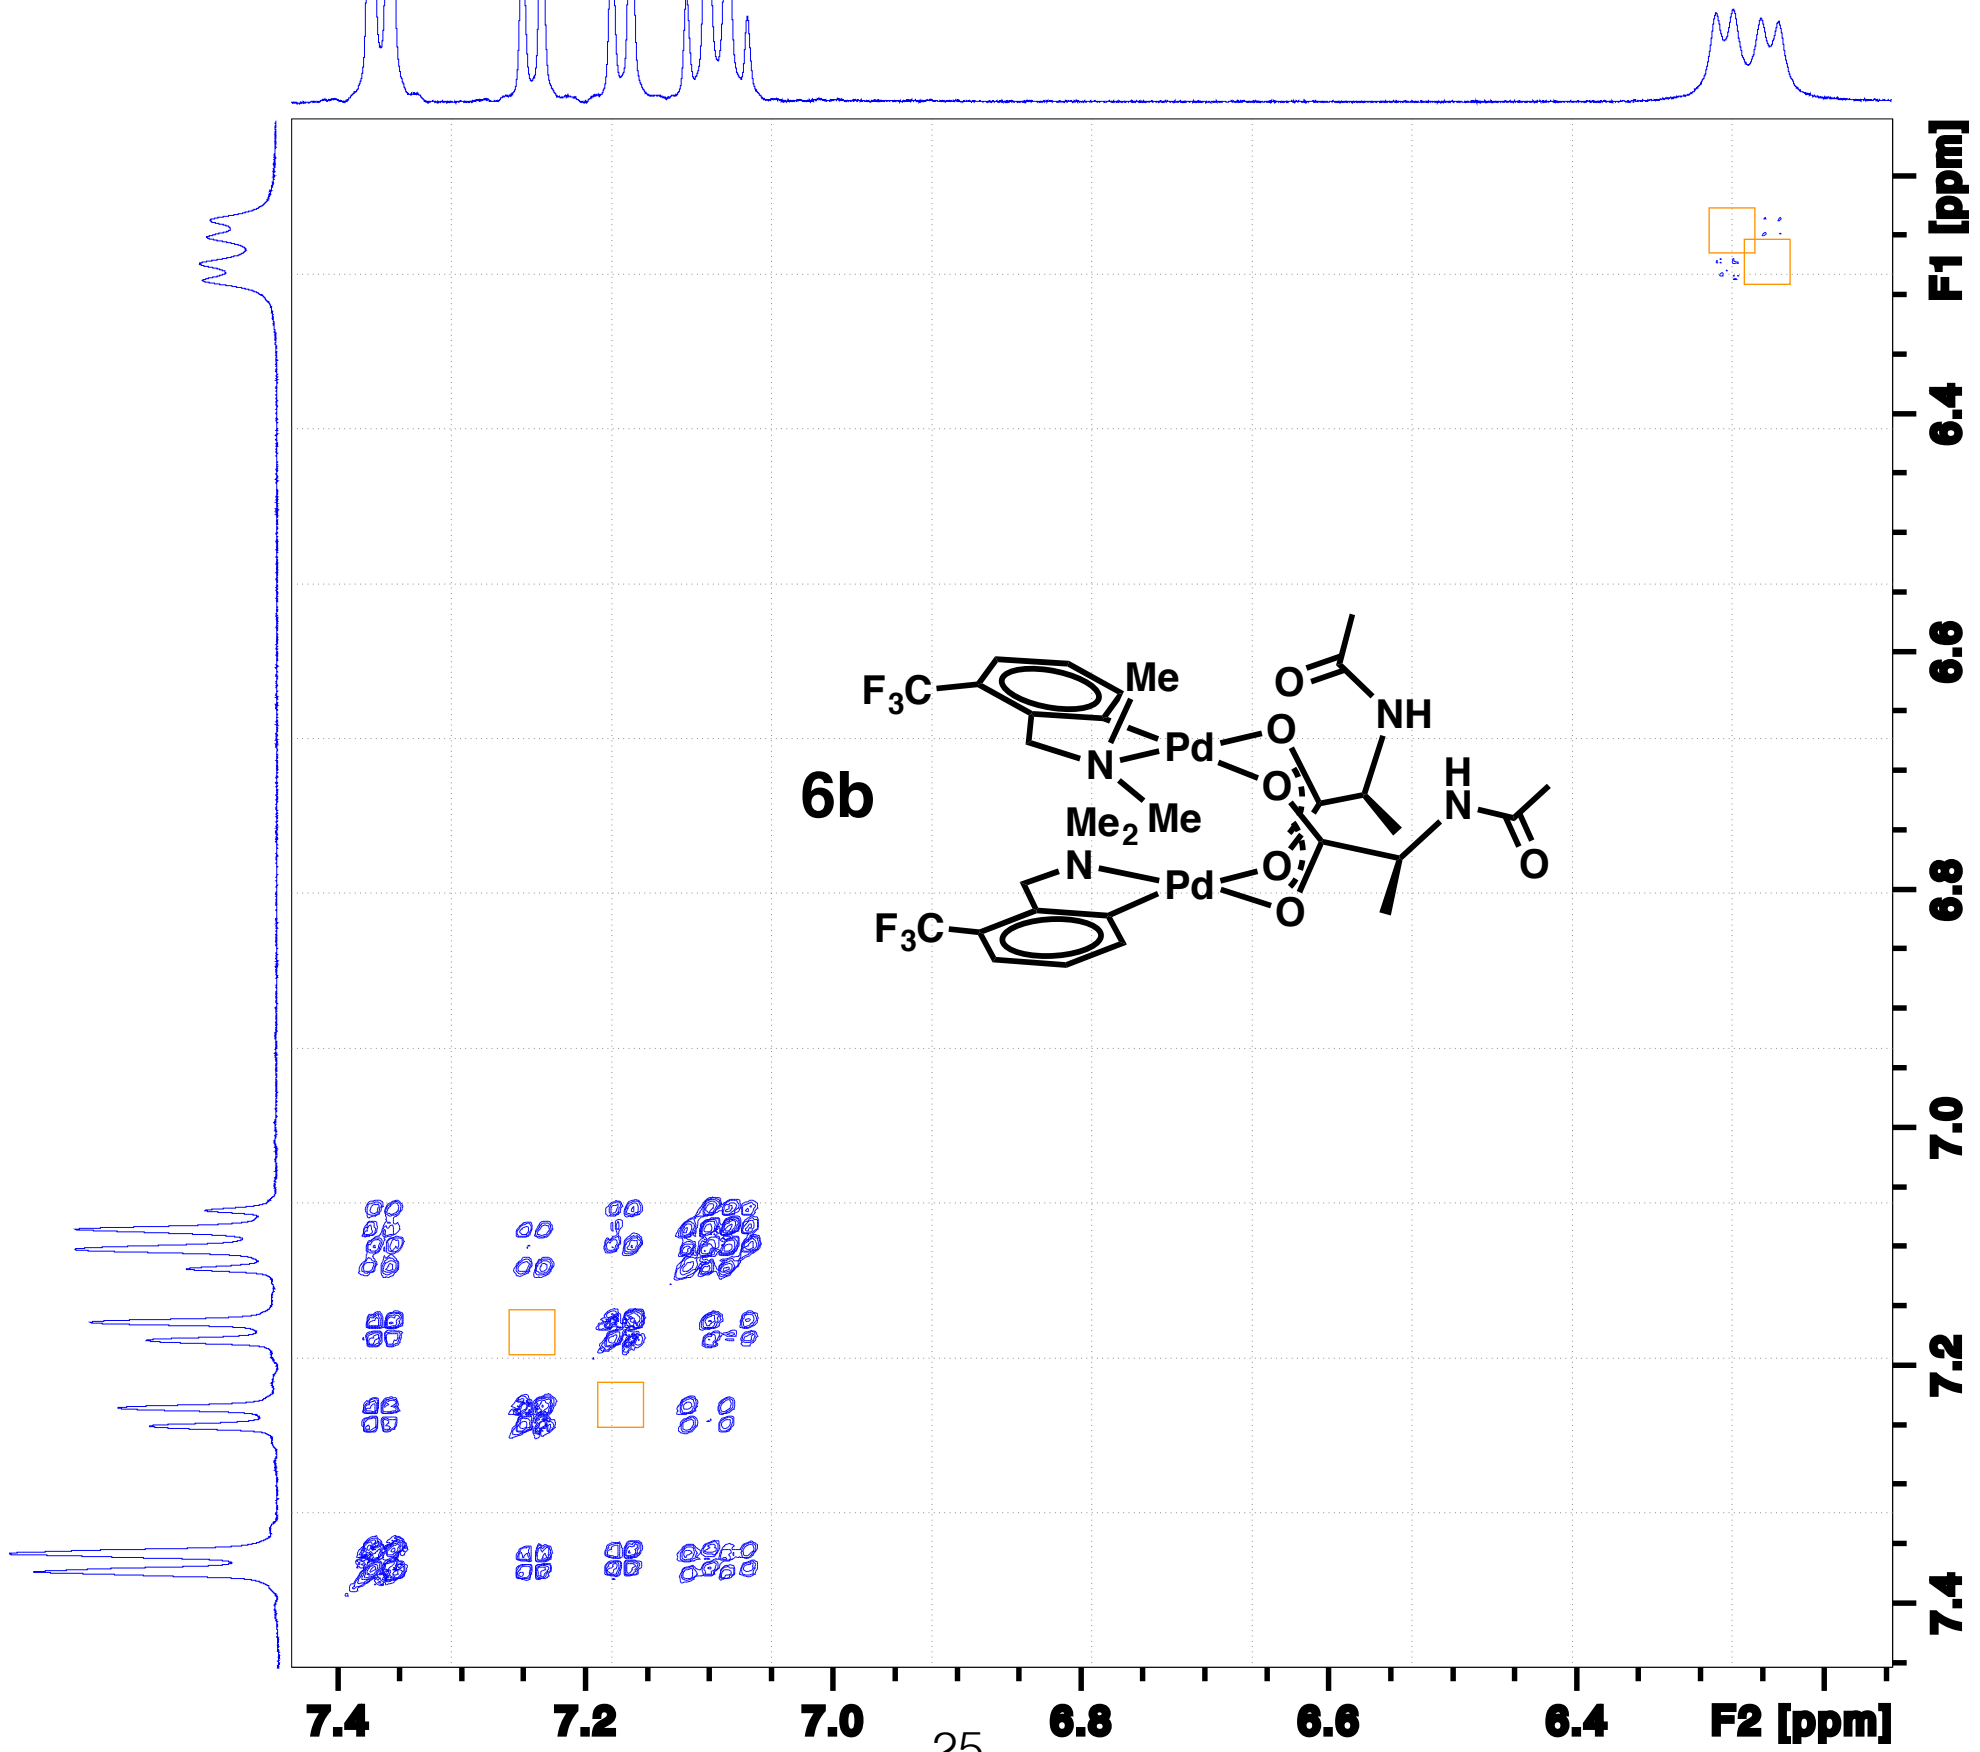

NOESY **6b**

[Pd(o-CF<sub>3</sub>-dmba)(NAc-Ala)]<sub>2</sub>

JJG06109 11 1 "/Users/joe/Dropbox/Grad/NMR Backups"

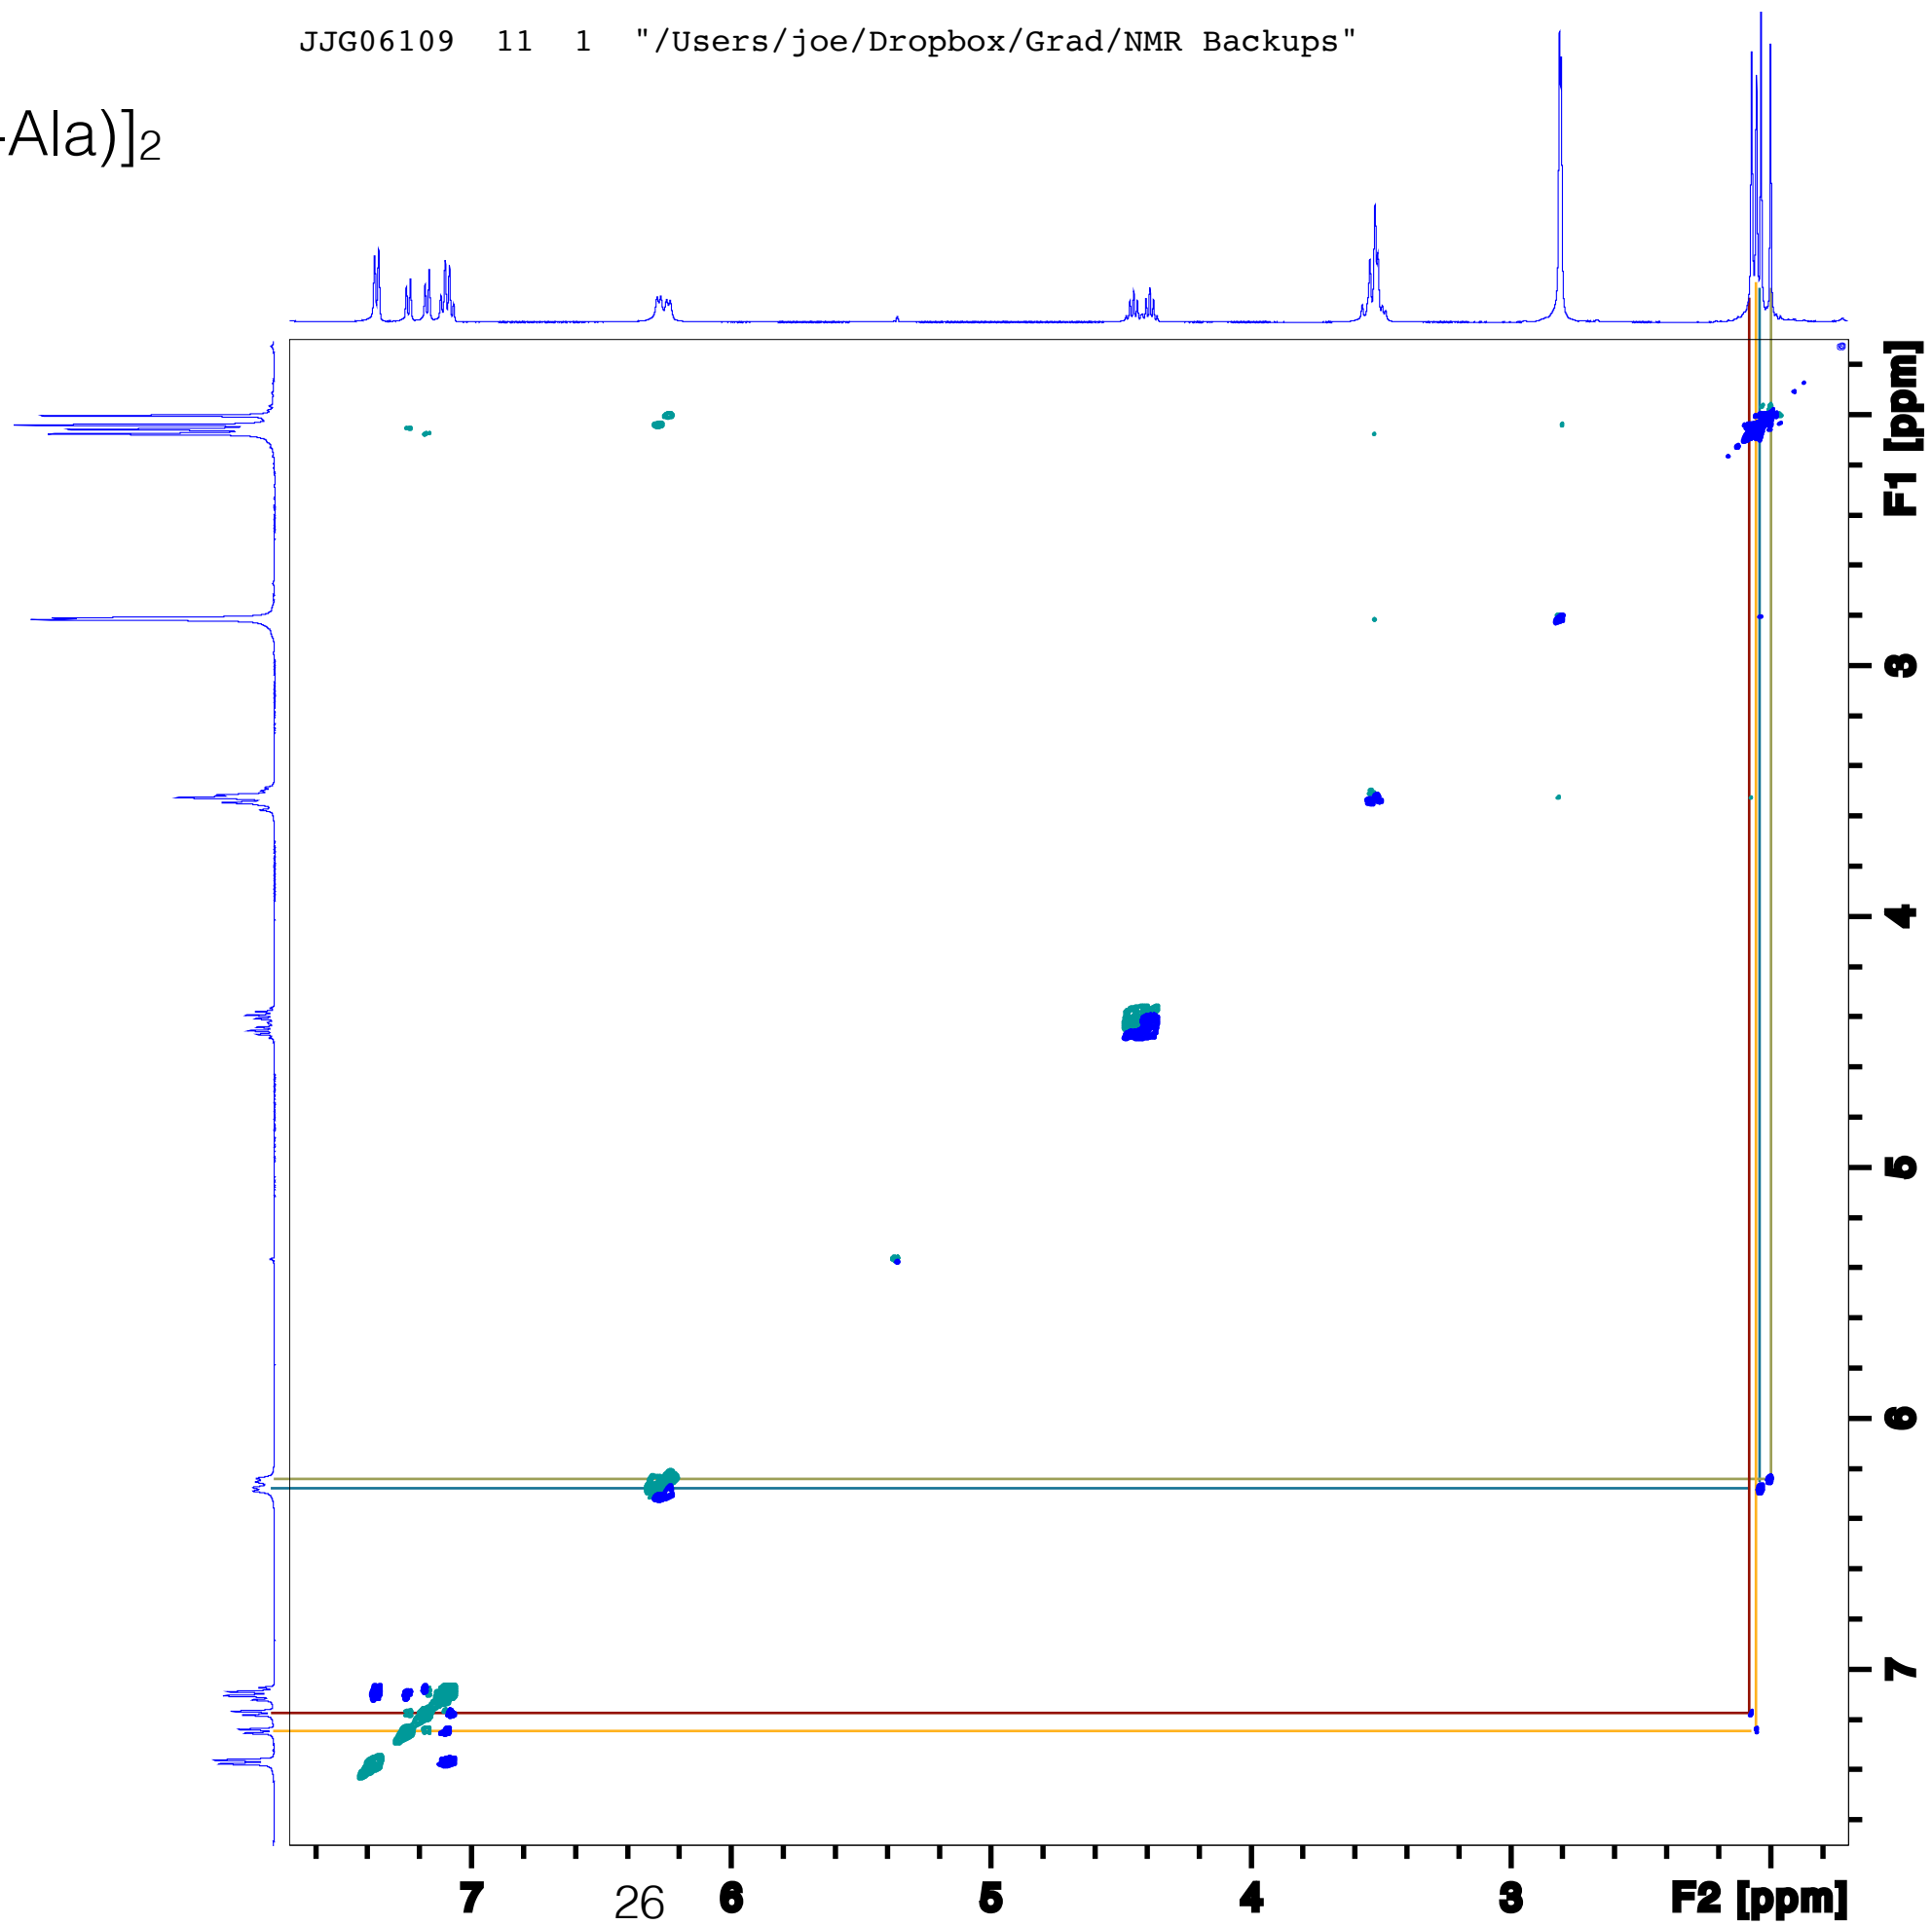

### Key NOE cross peaks **6b**

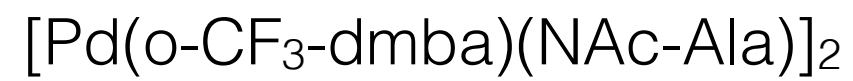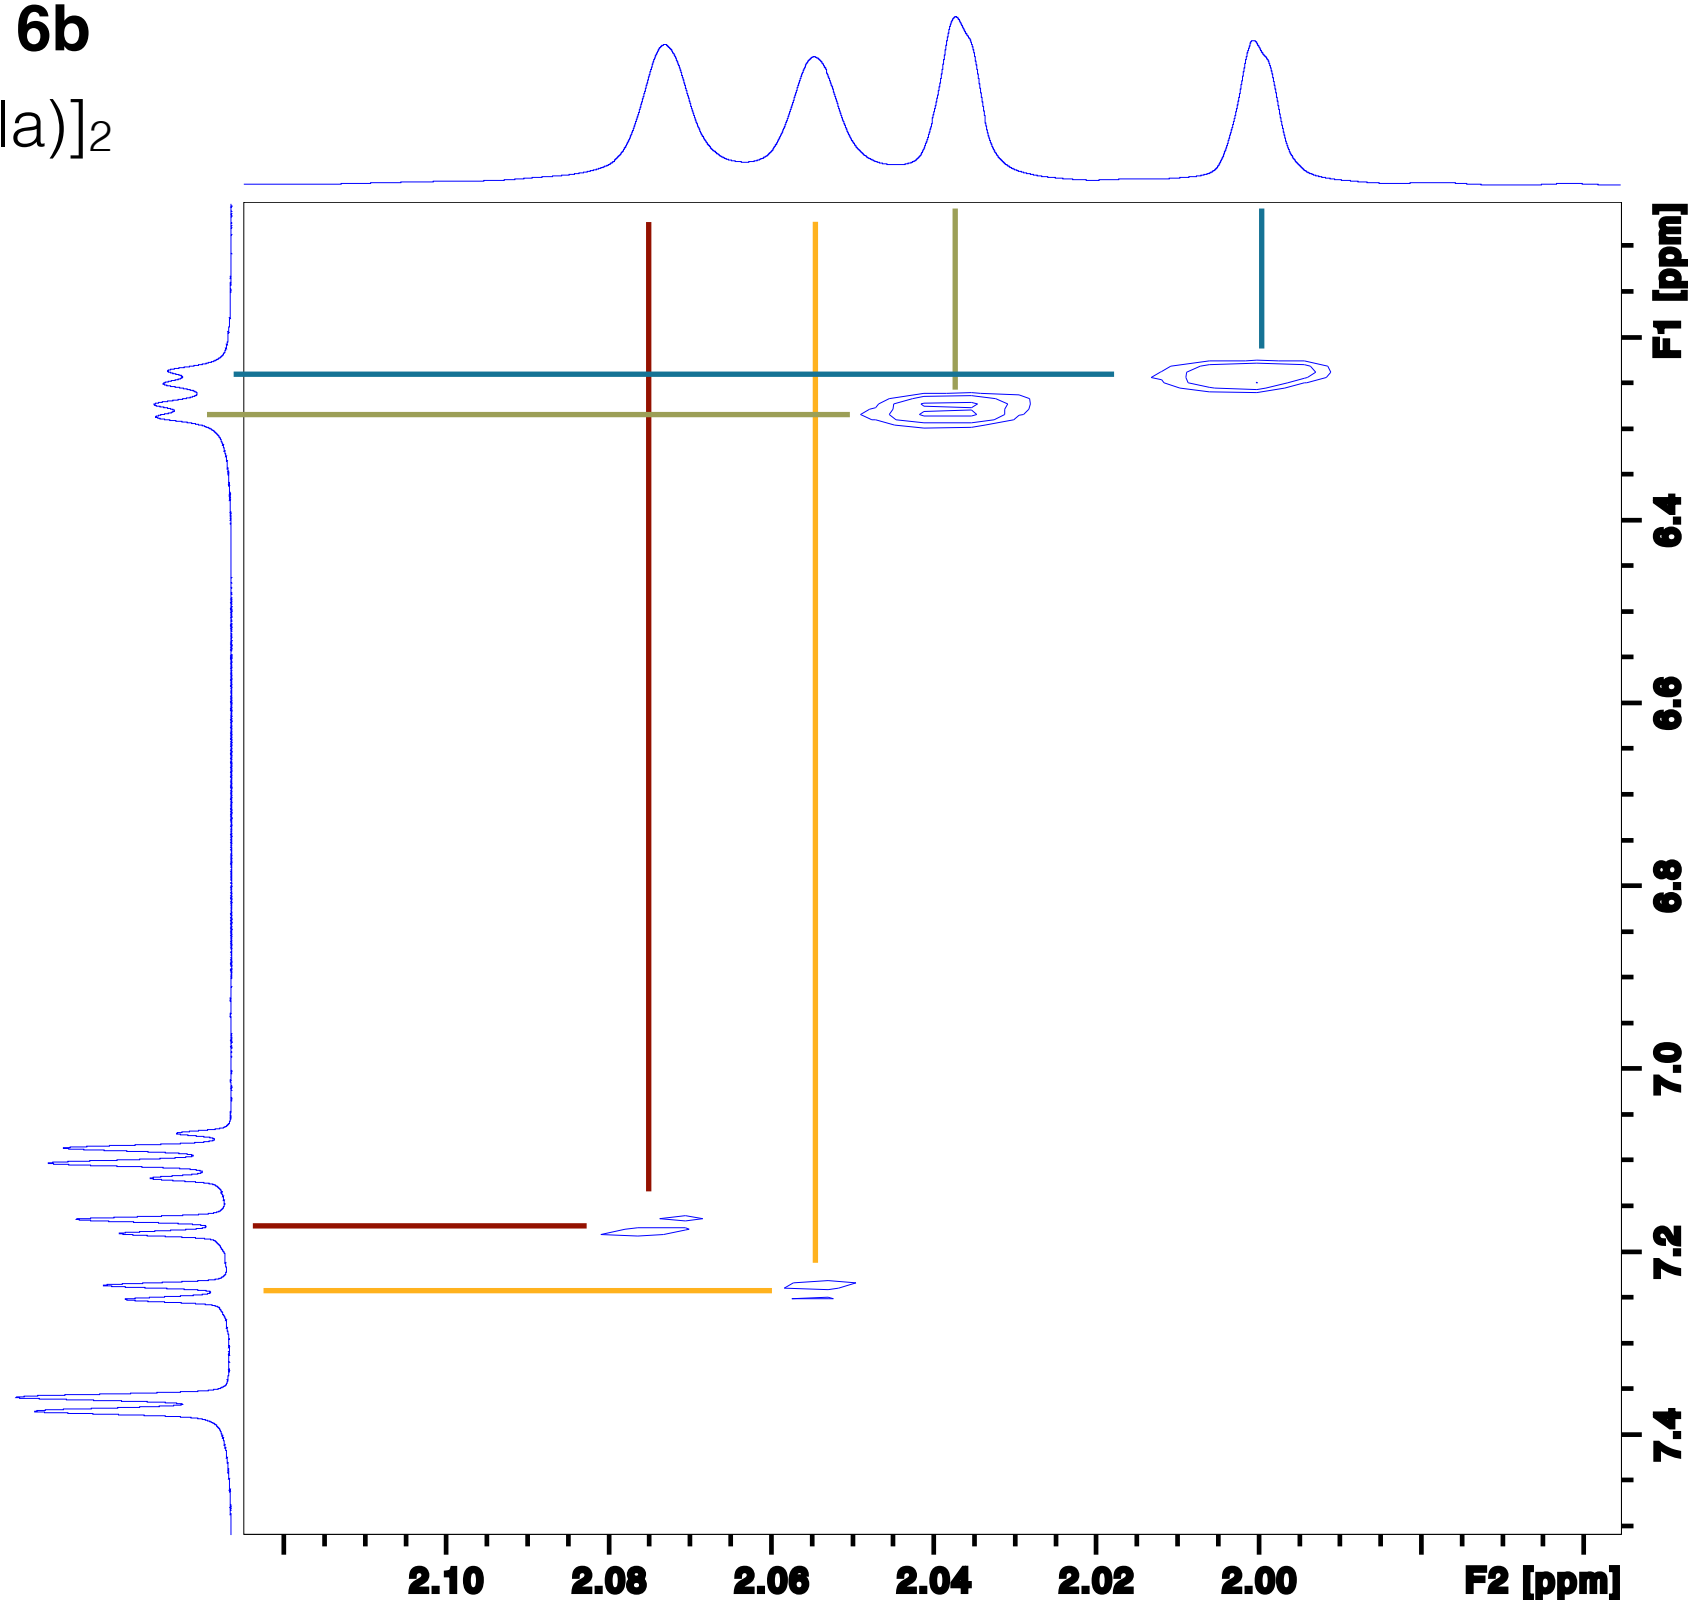

weak NOE cross peaks **6b**  
 from MPAA to substrate  
 [Pd(CF<sub>3</sub>-dmba)(NAC-Ala)]<sub>2</sub>

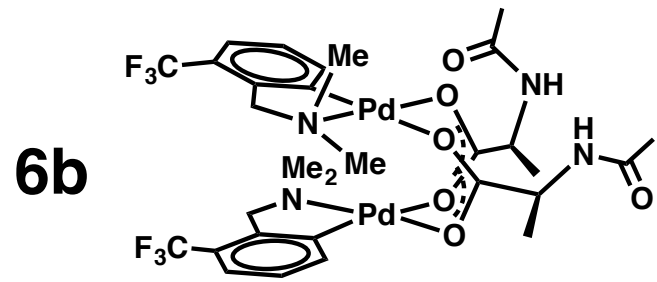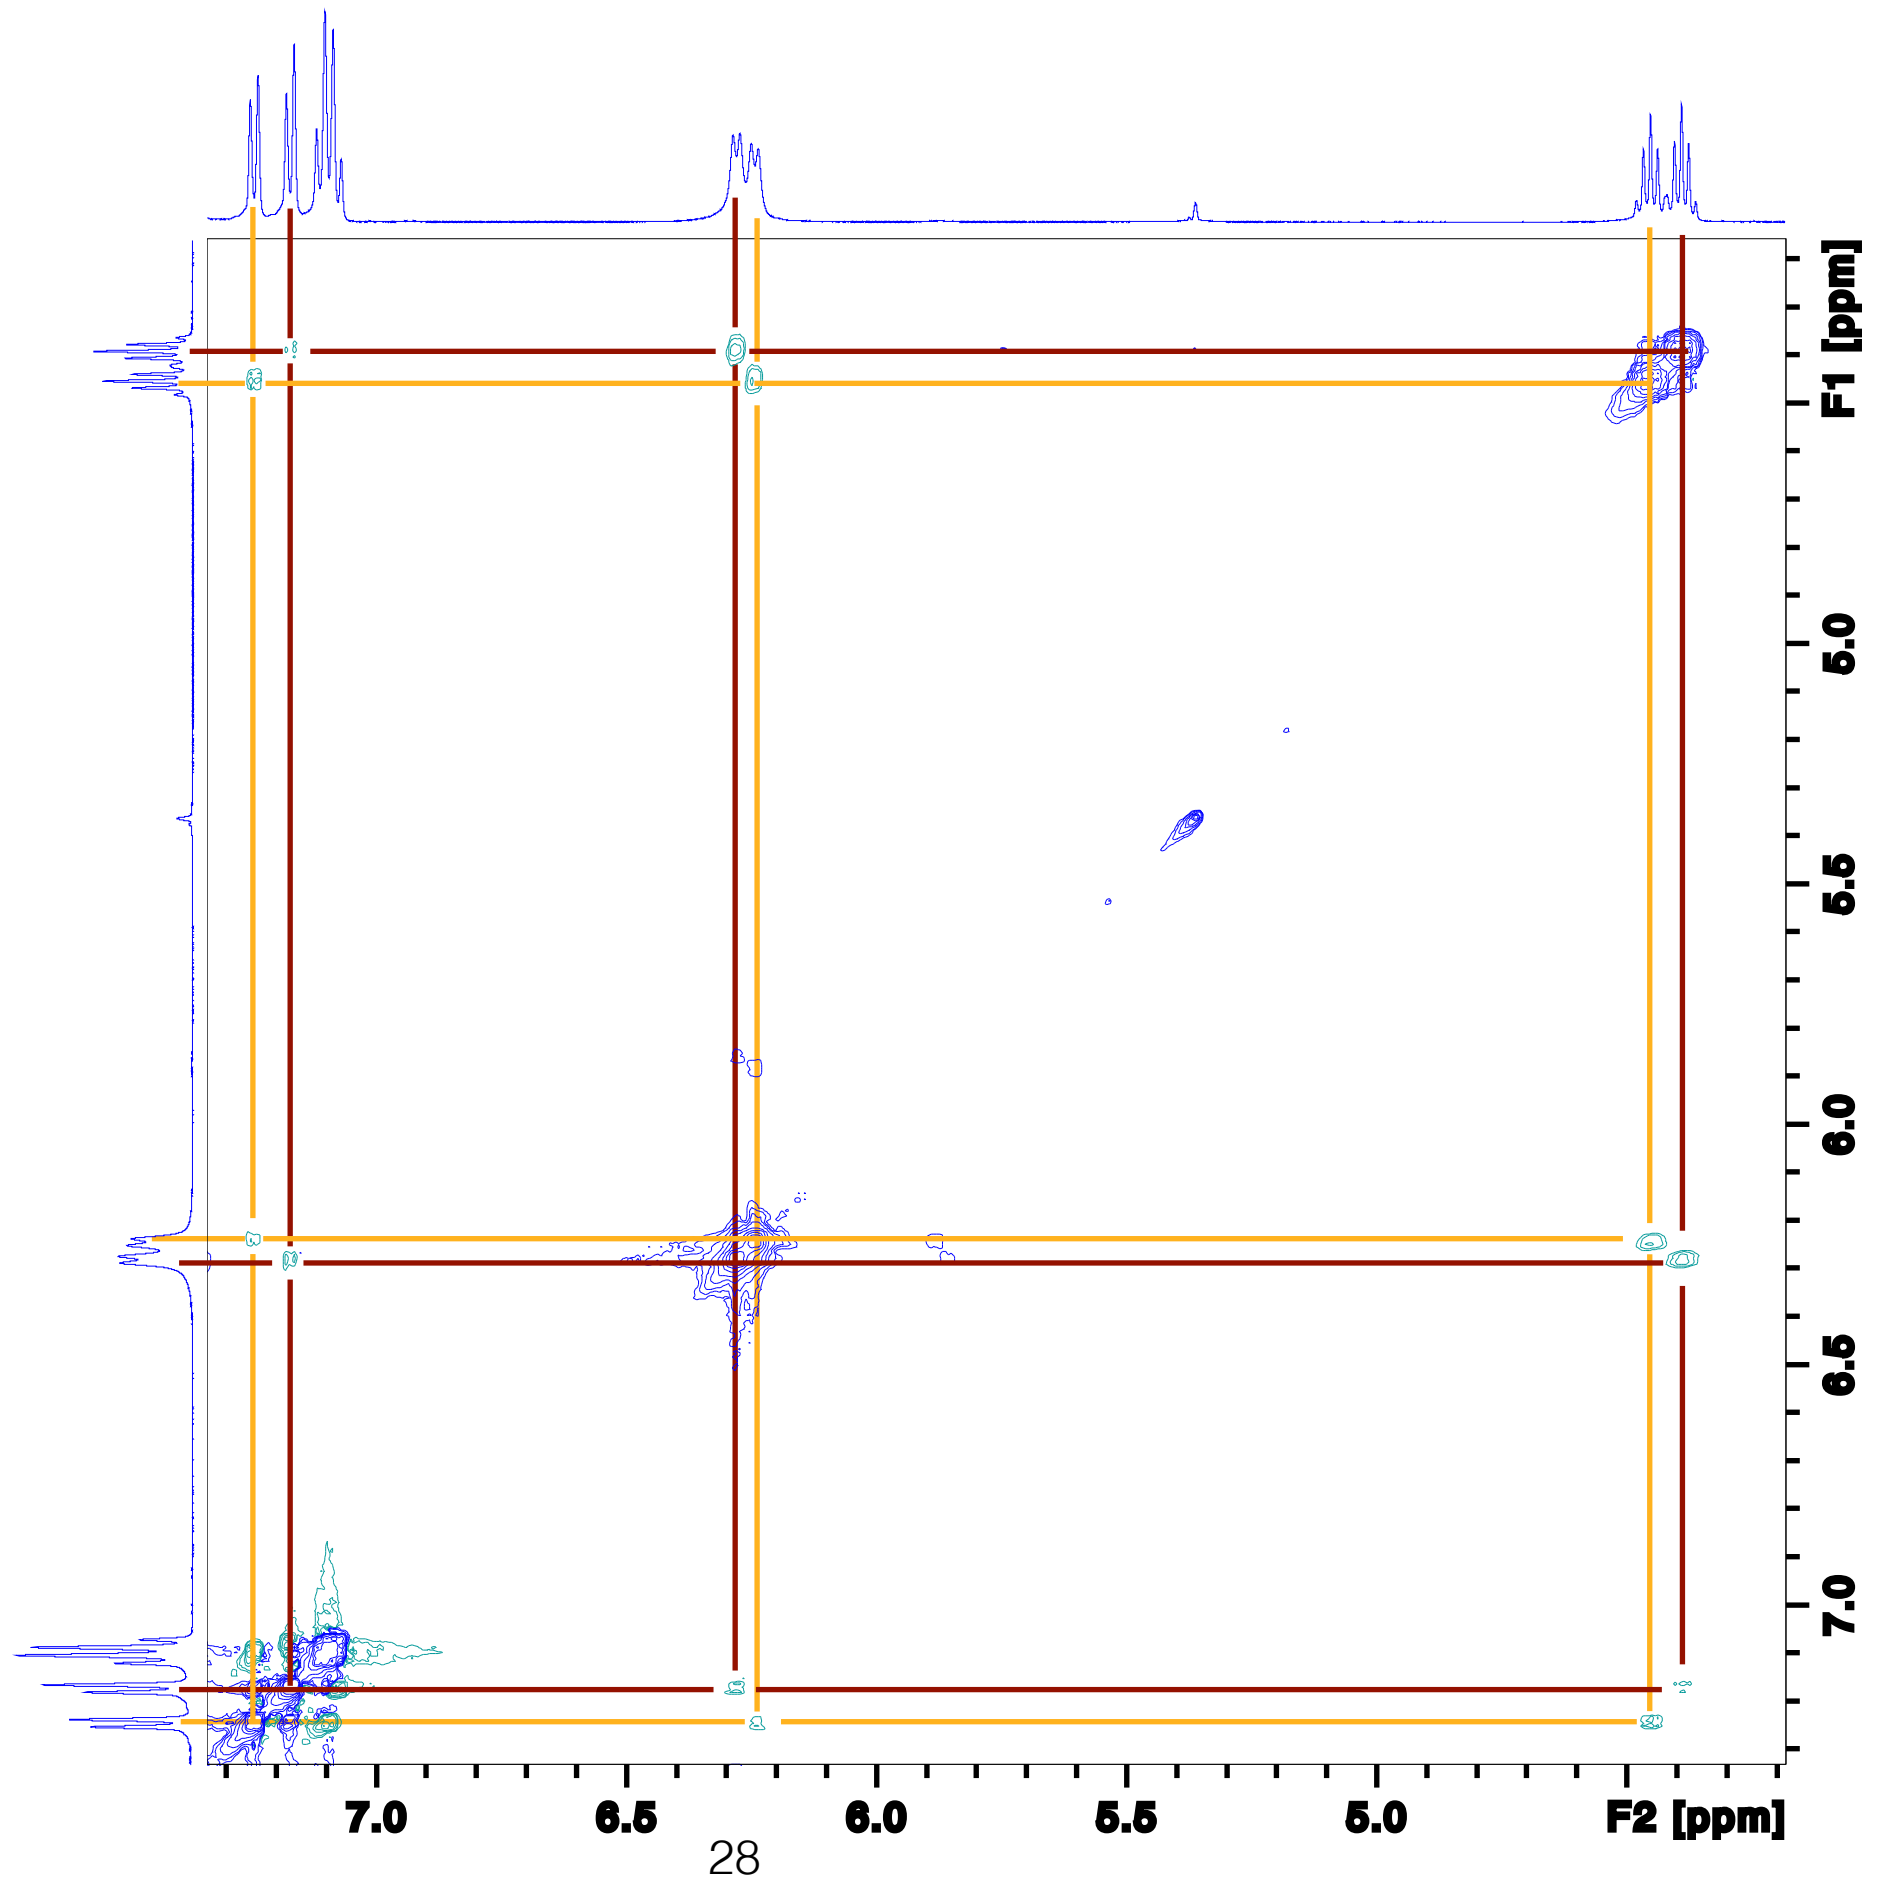



<sup>13</sup>C [Pd(o-CF<sub>3</sub>-dmba)(NAc-Ala)]<sub>2</sub>

JJG06108 4 1 "/Users/joe/Dropbox/Grad/NMR Backups"

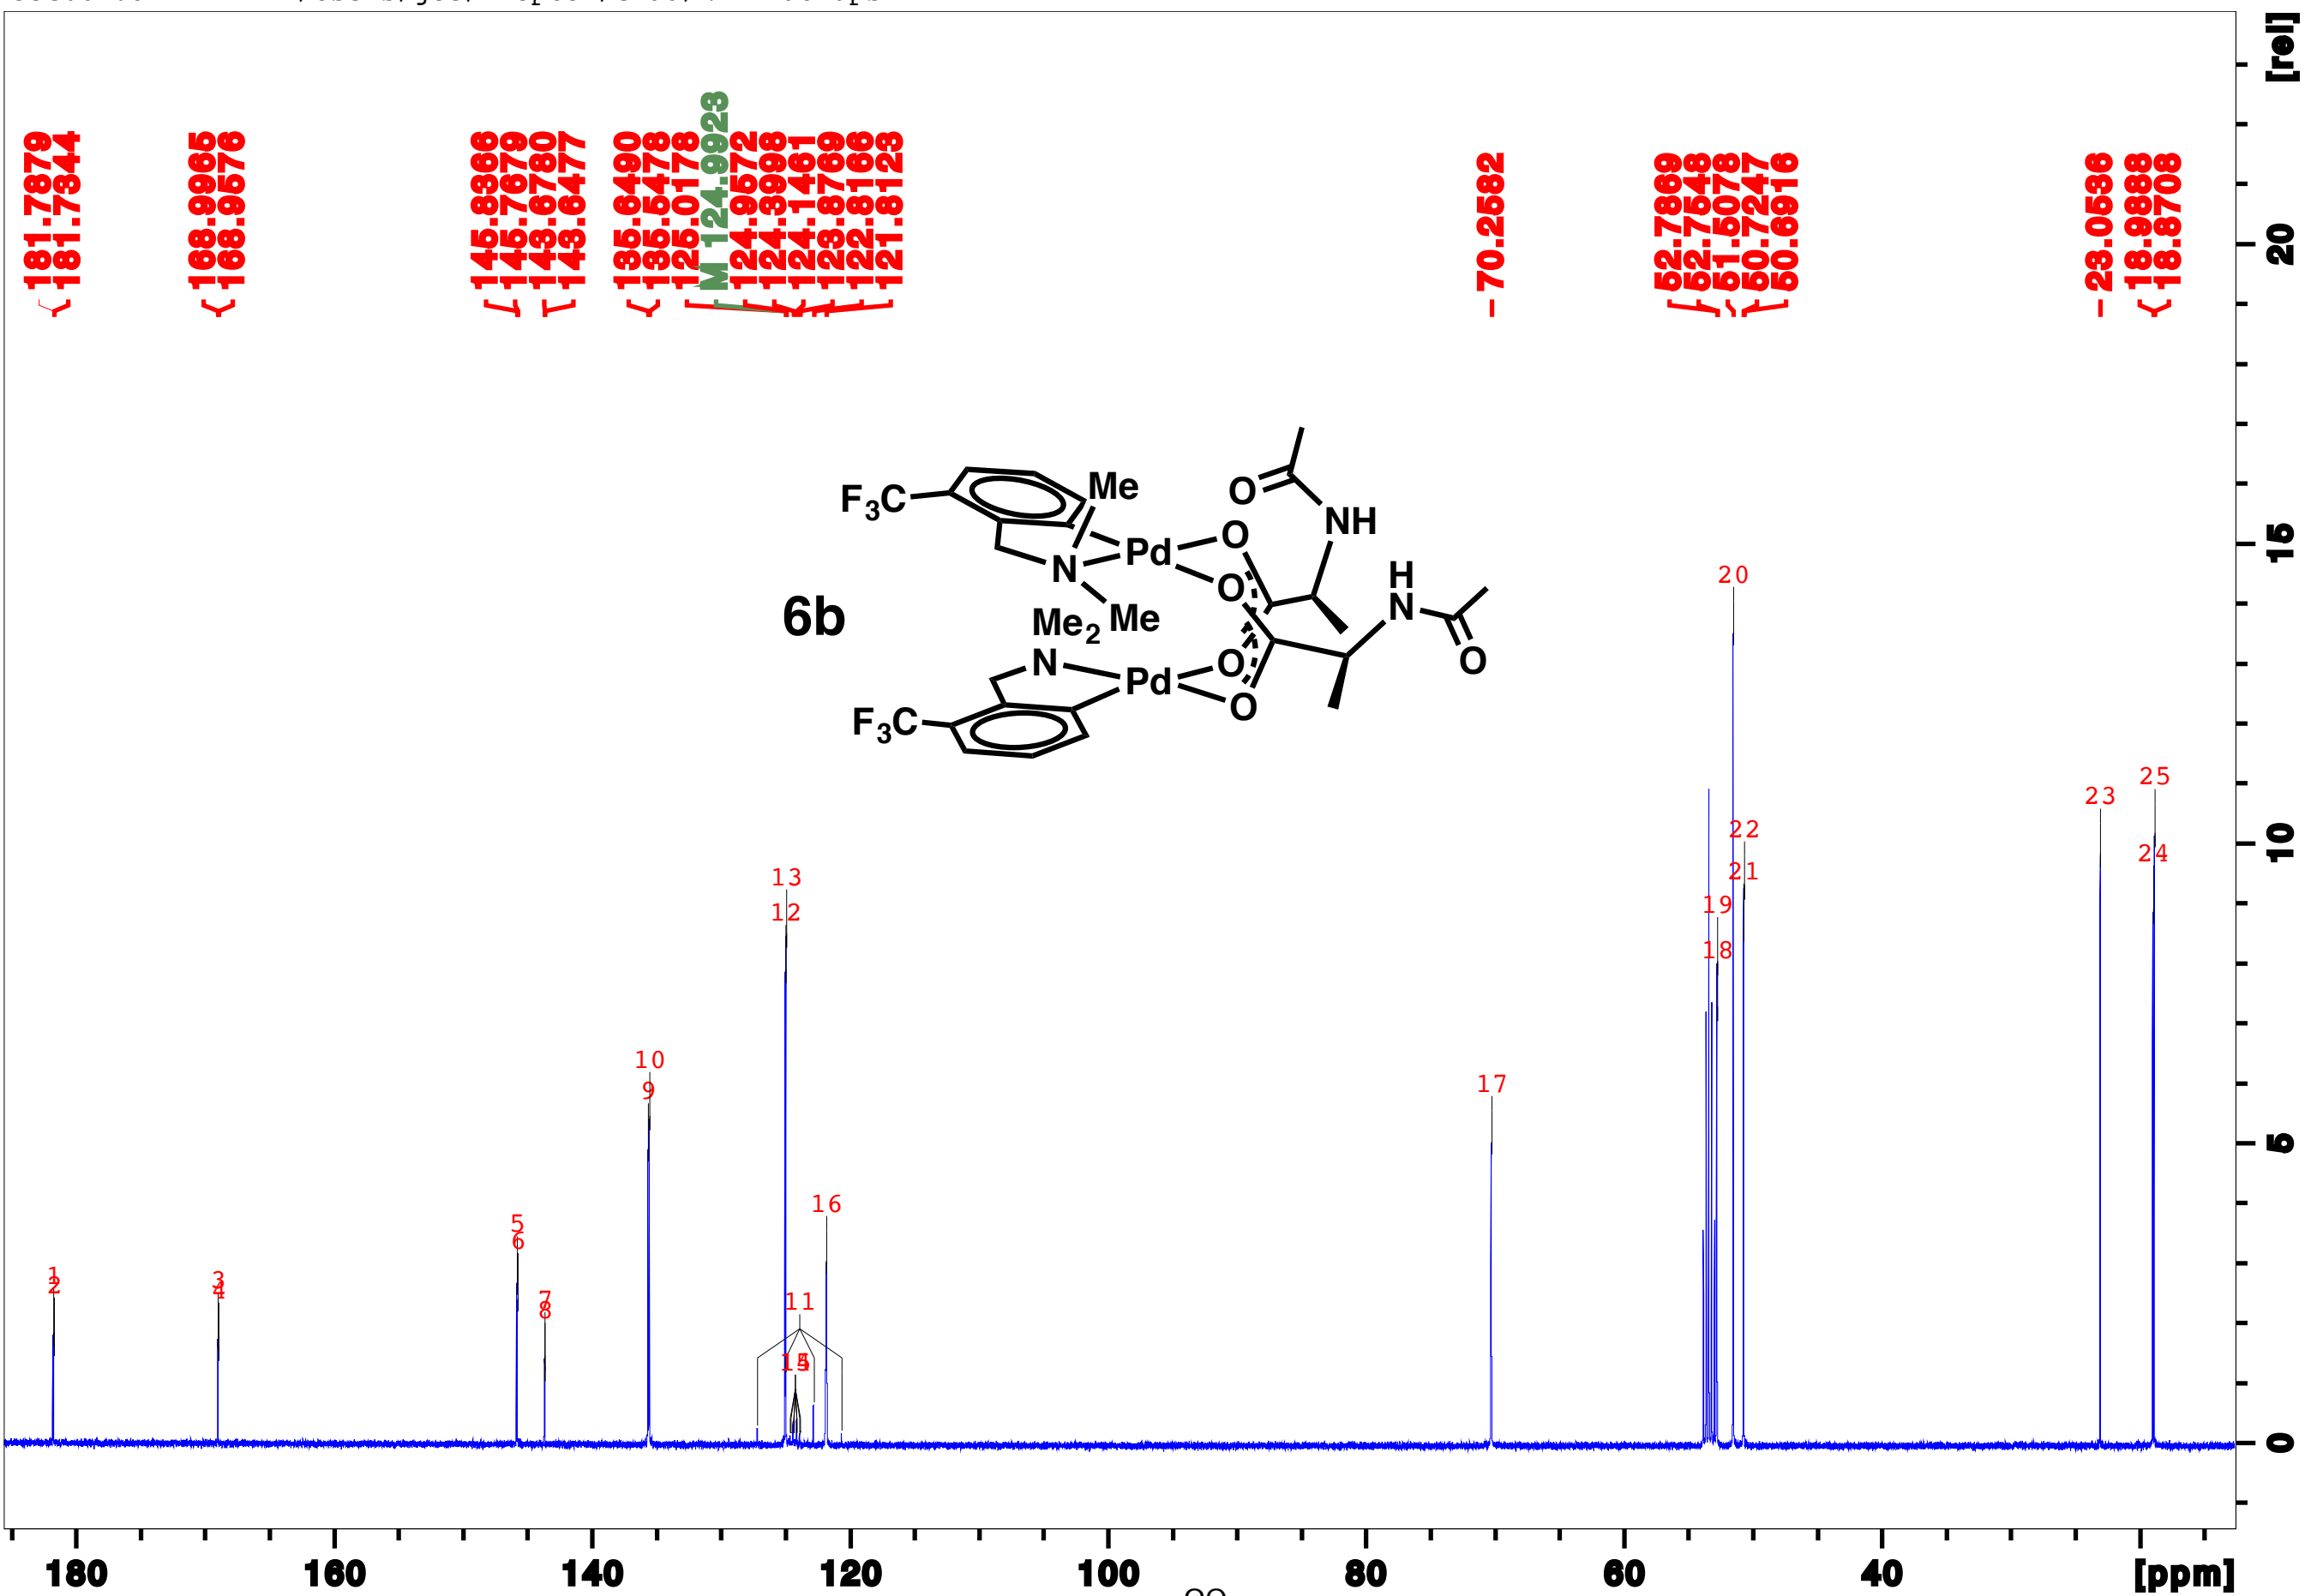

HMCQ

JJG06108 5 1 "/Users/joe/Dropbox/Grad/NMR Backups"

[Pd(o-CF<sub>3</sub>-dmba)(NAc-Ala)]<sub>2</sub>

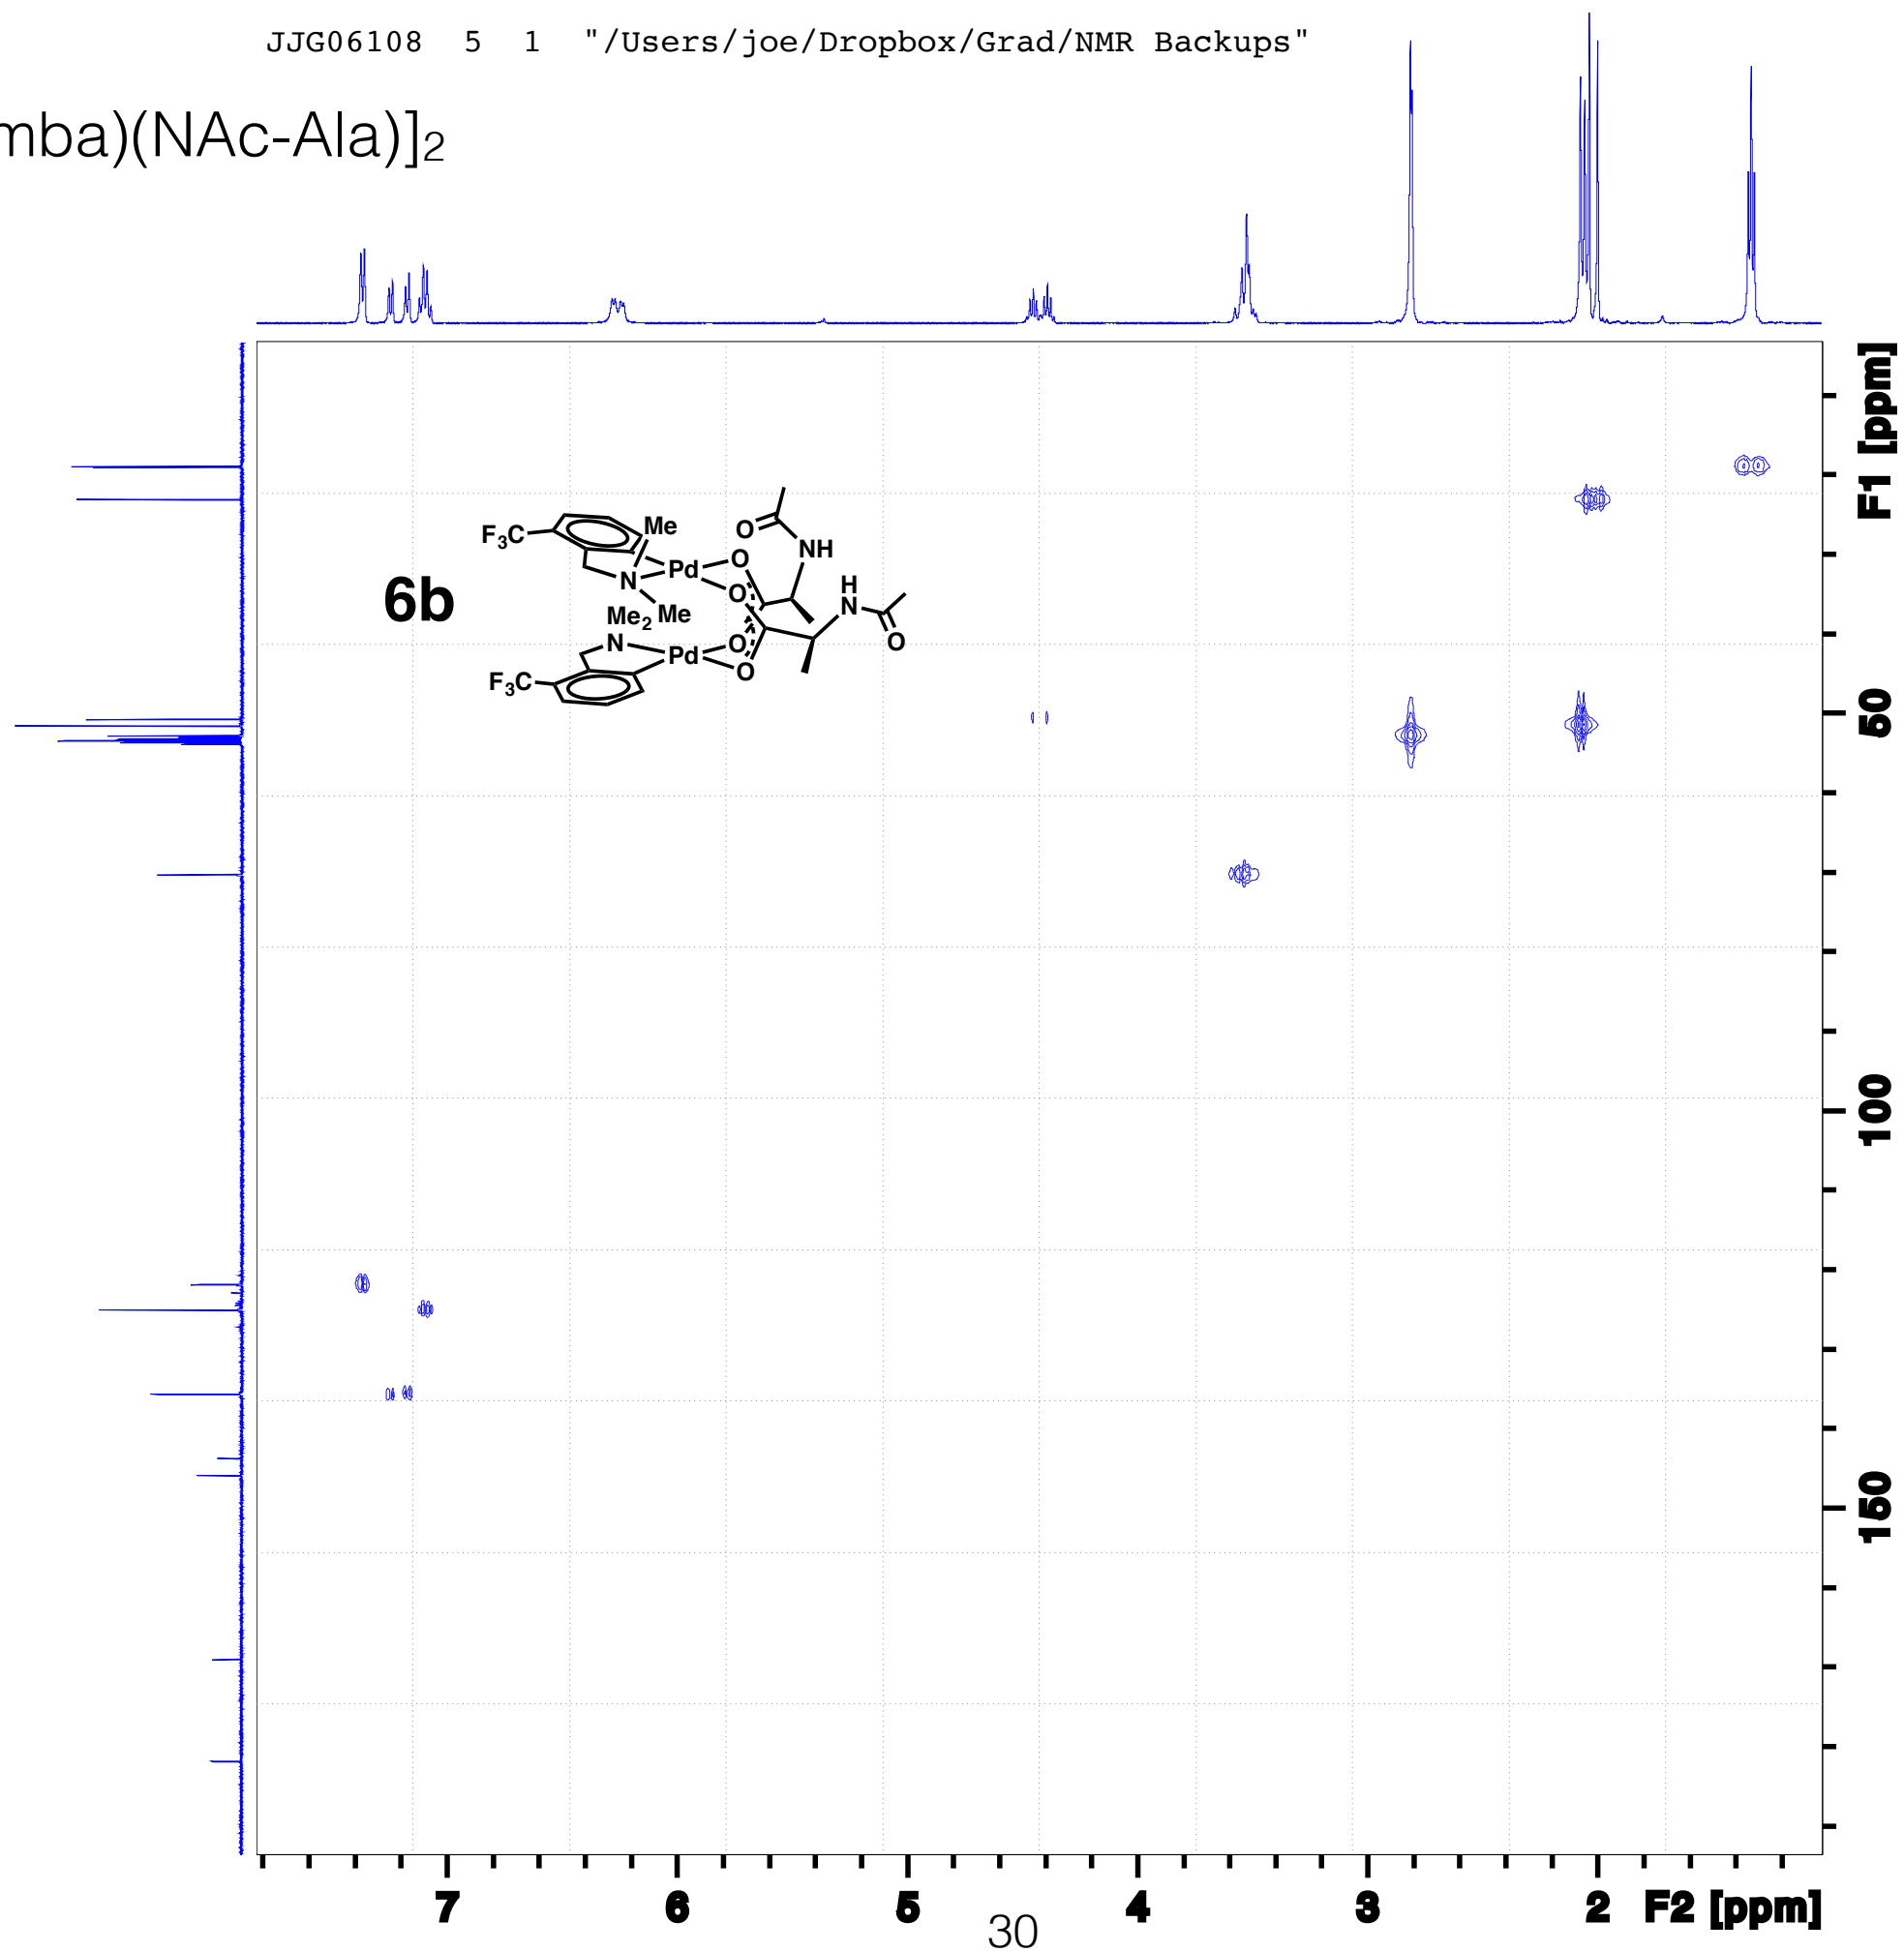

# 13C aliphatic [Pd(o-CF<sub>3</sub>-dmba)(NAc-Ala)]<sub>2</sub>

JJG06108 4 1 "/Users/joe/Dropbox/Grad/NMR Backups"

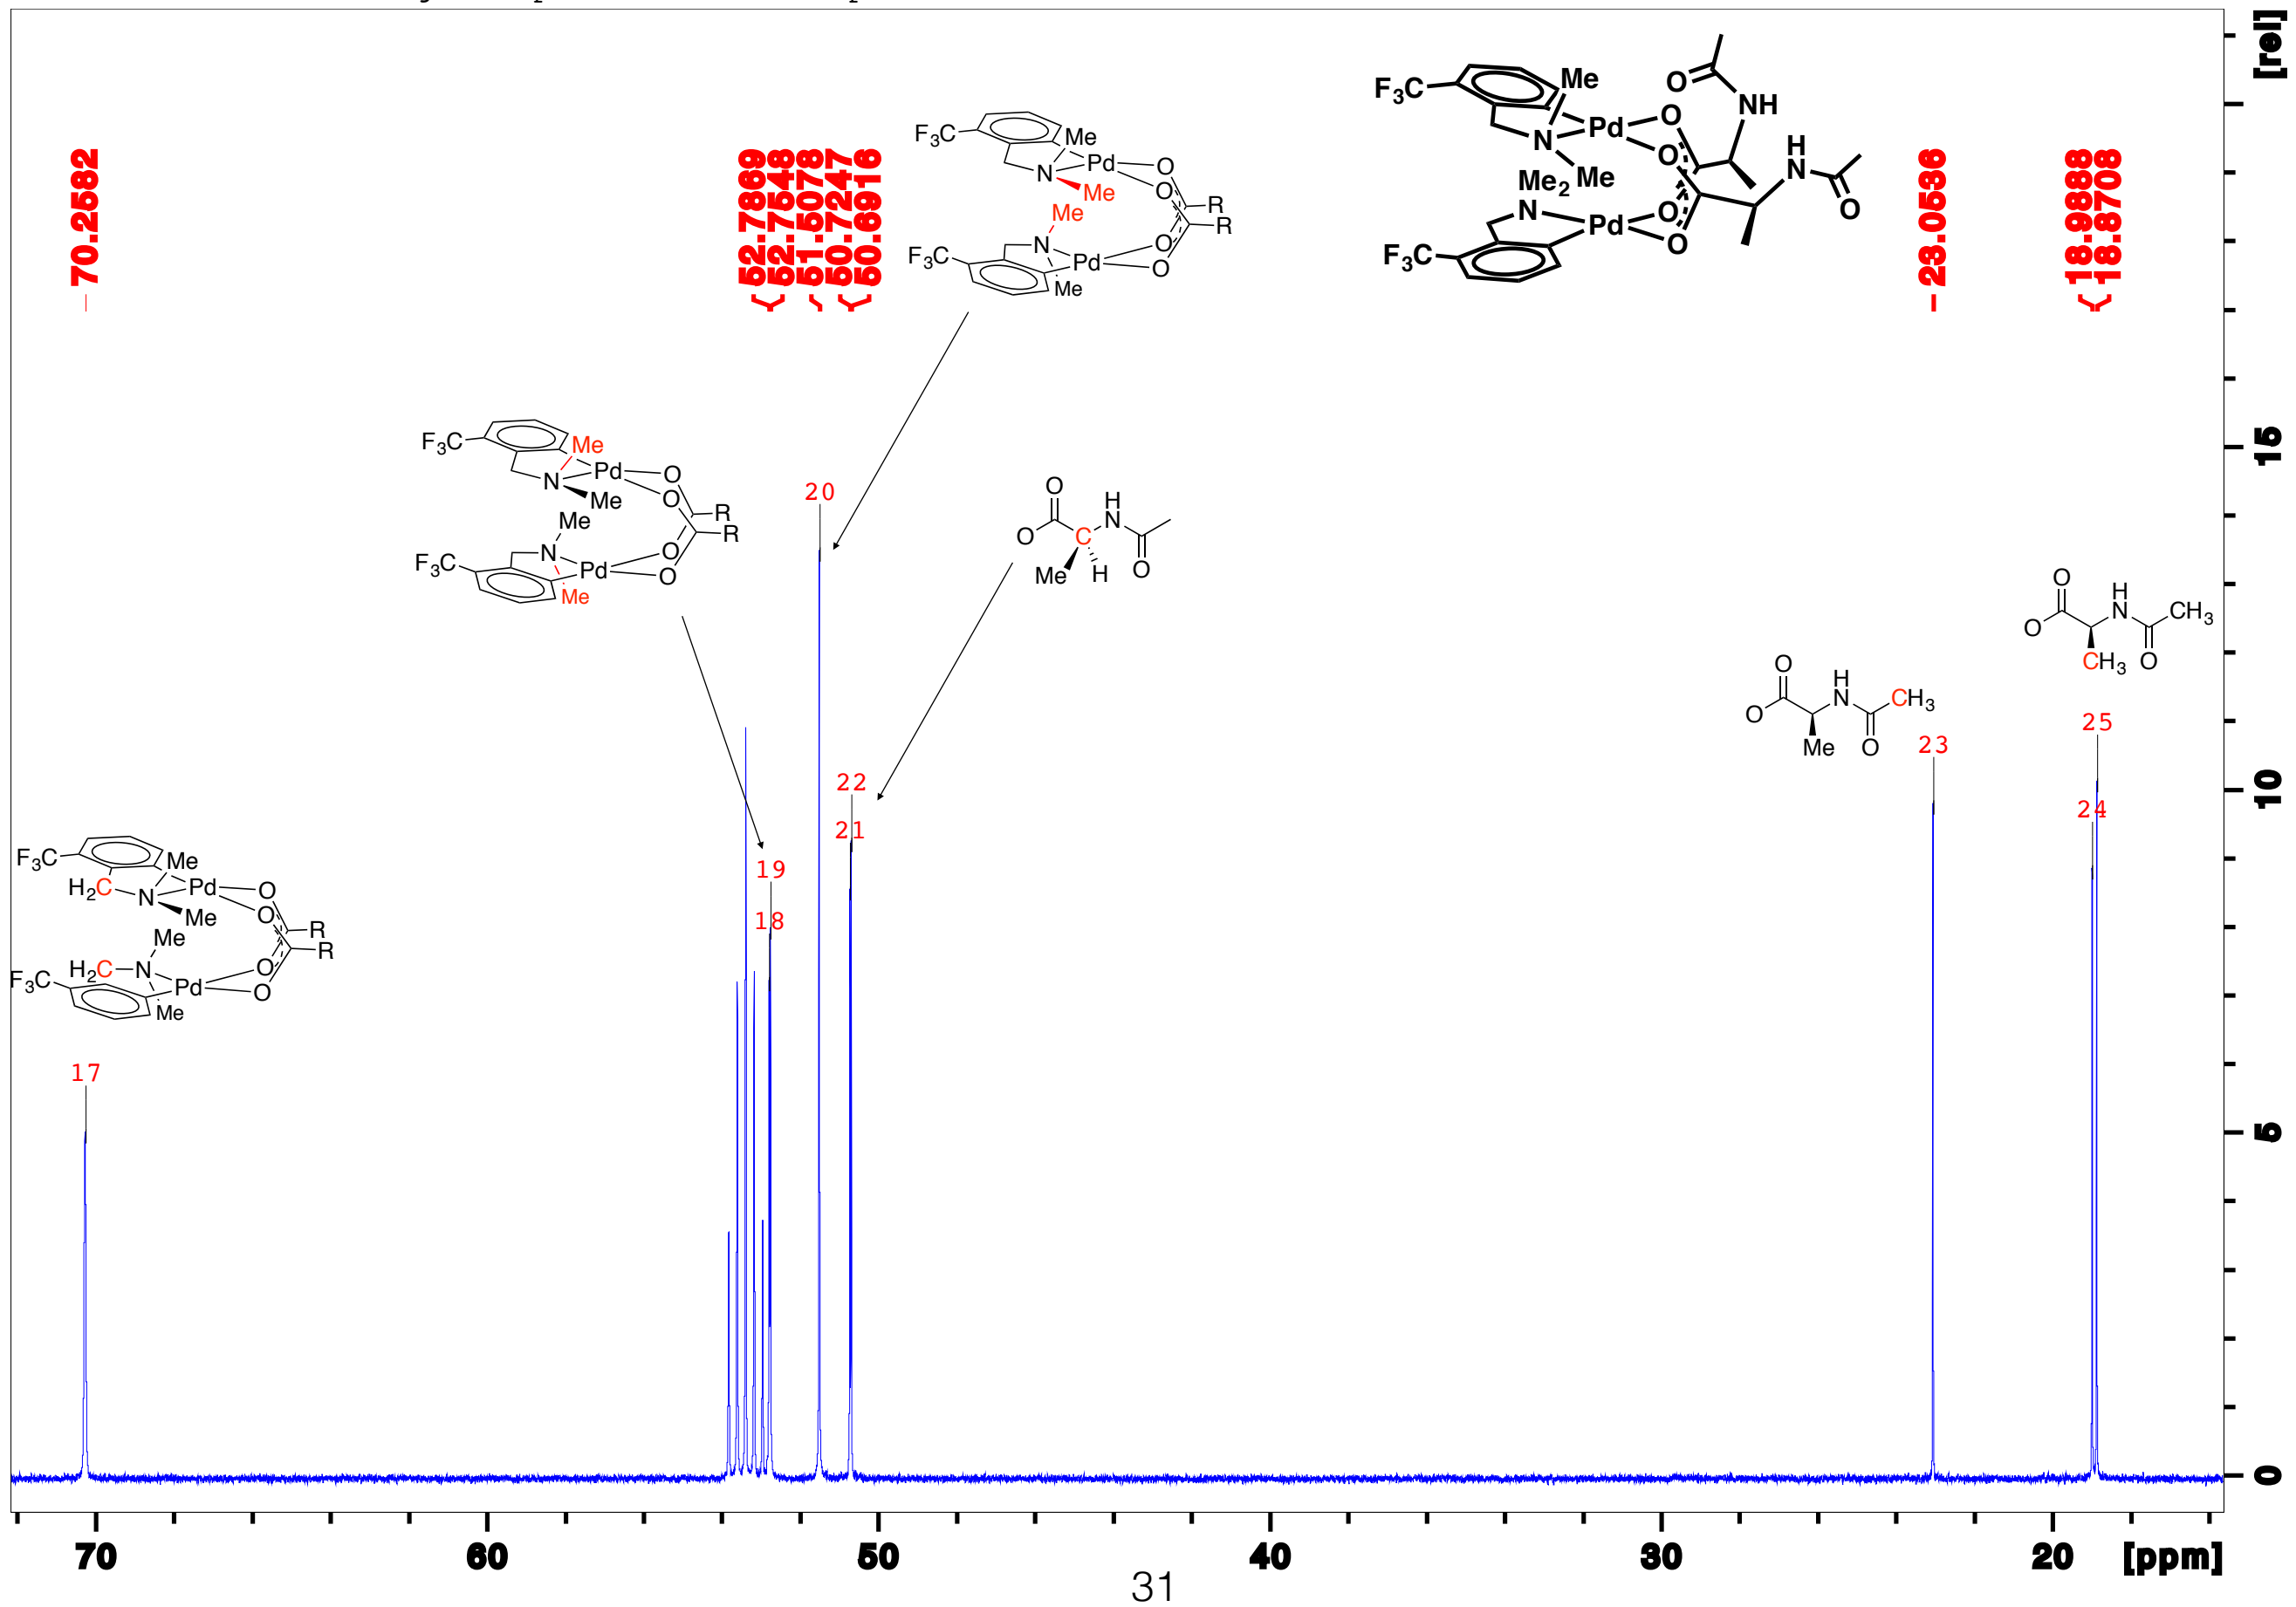

HMCQ aliphatic

[Pd(o-CF<sub>3</sub>-dmba)(NAC-Ala)]<sub>2</sub>

JJG06108 5 1 "/Users/joe/Dropbox/Grad/NMR Backups"

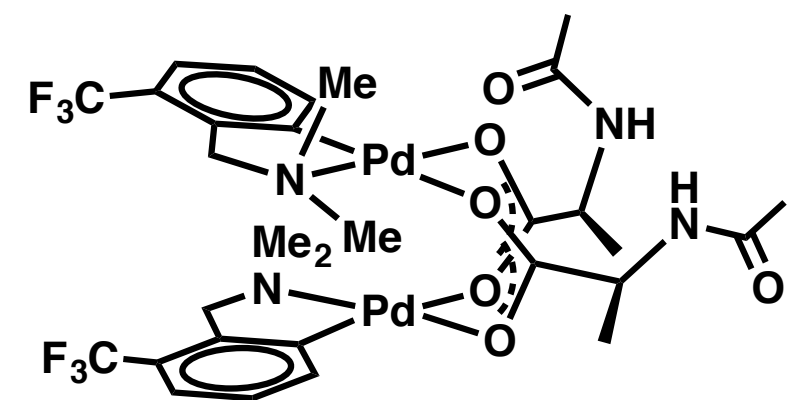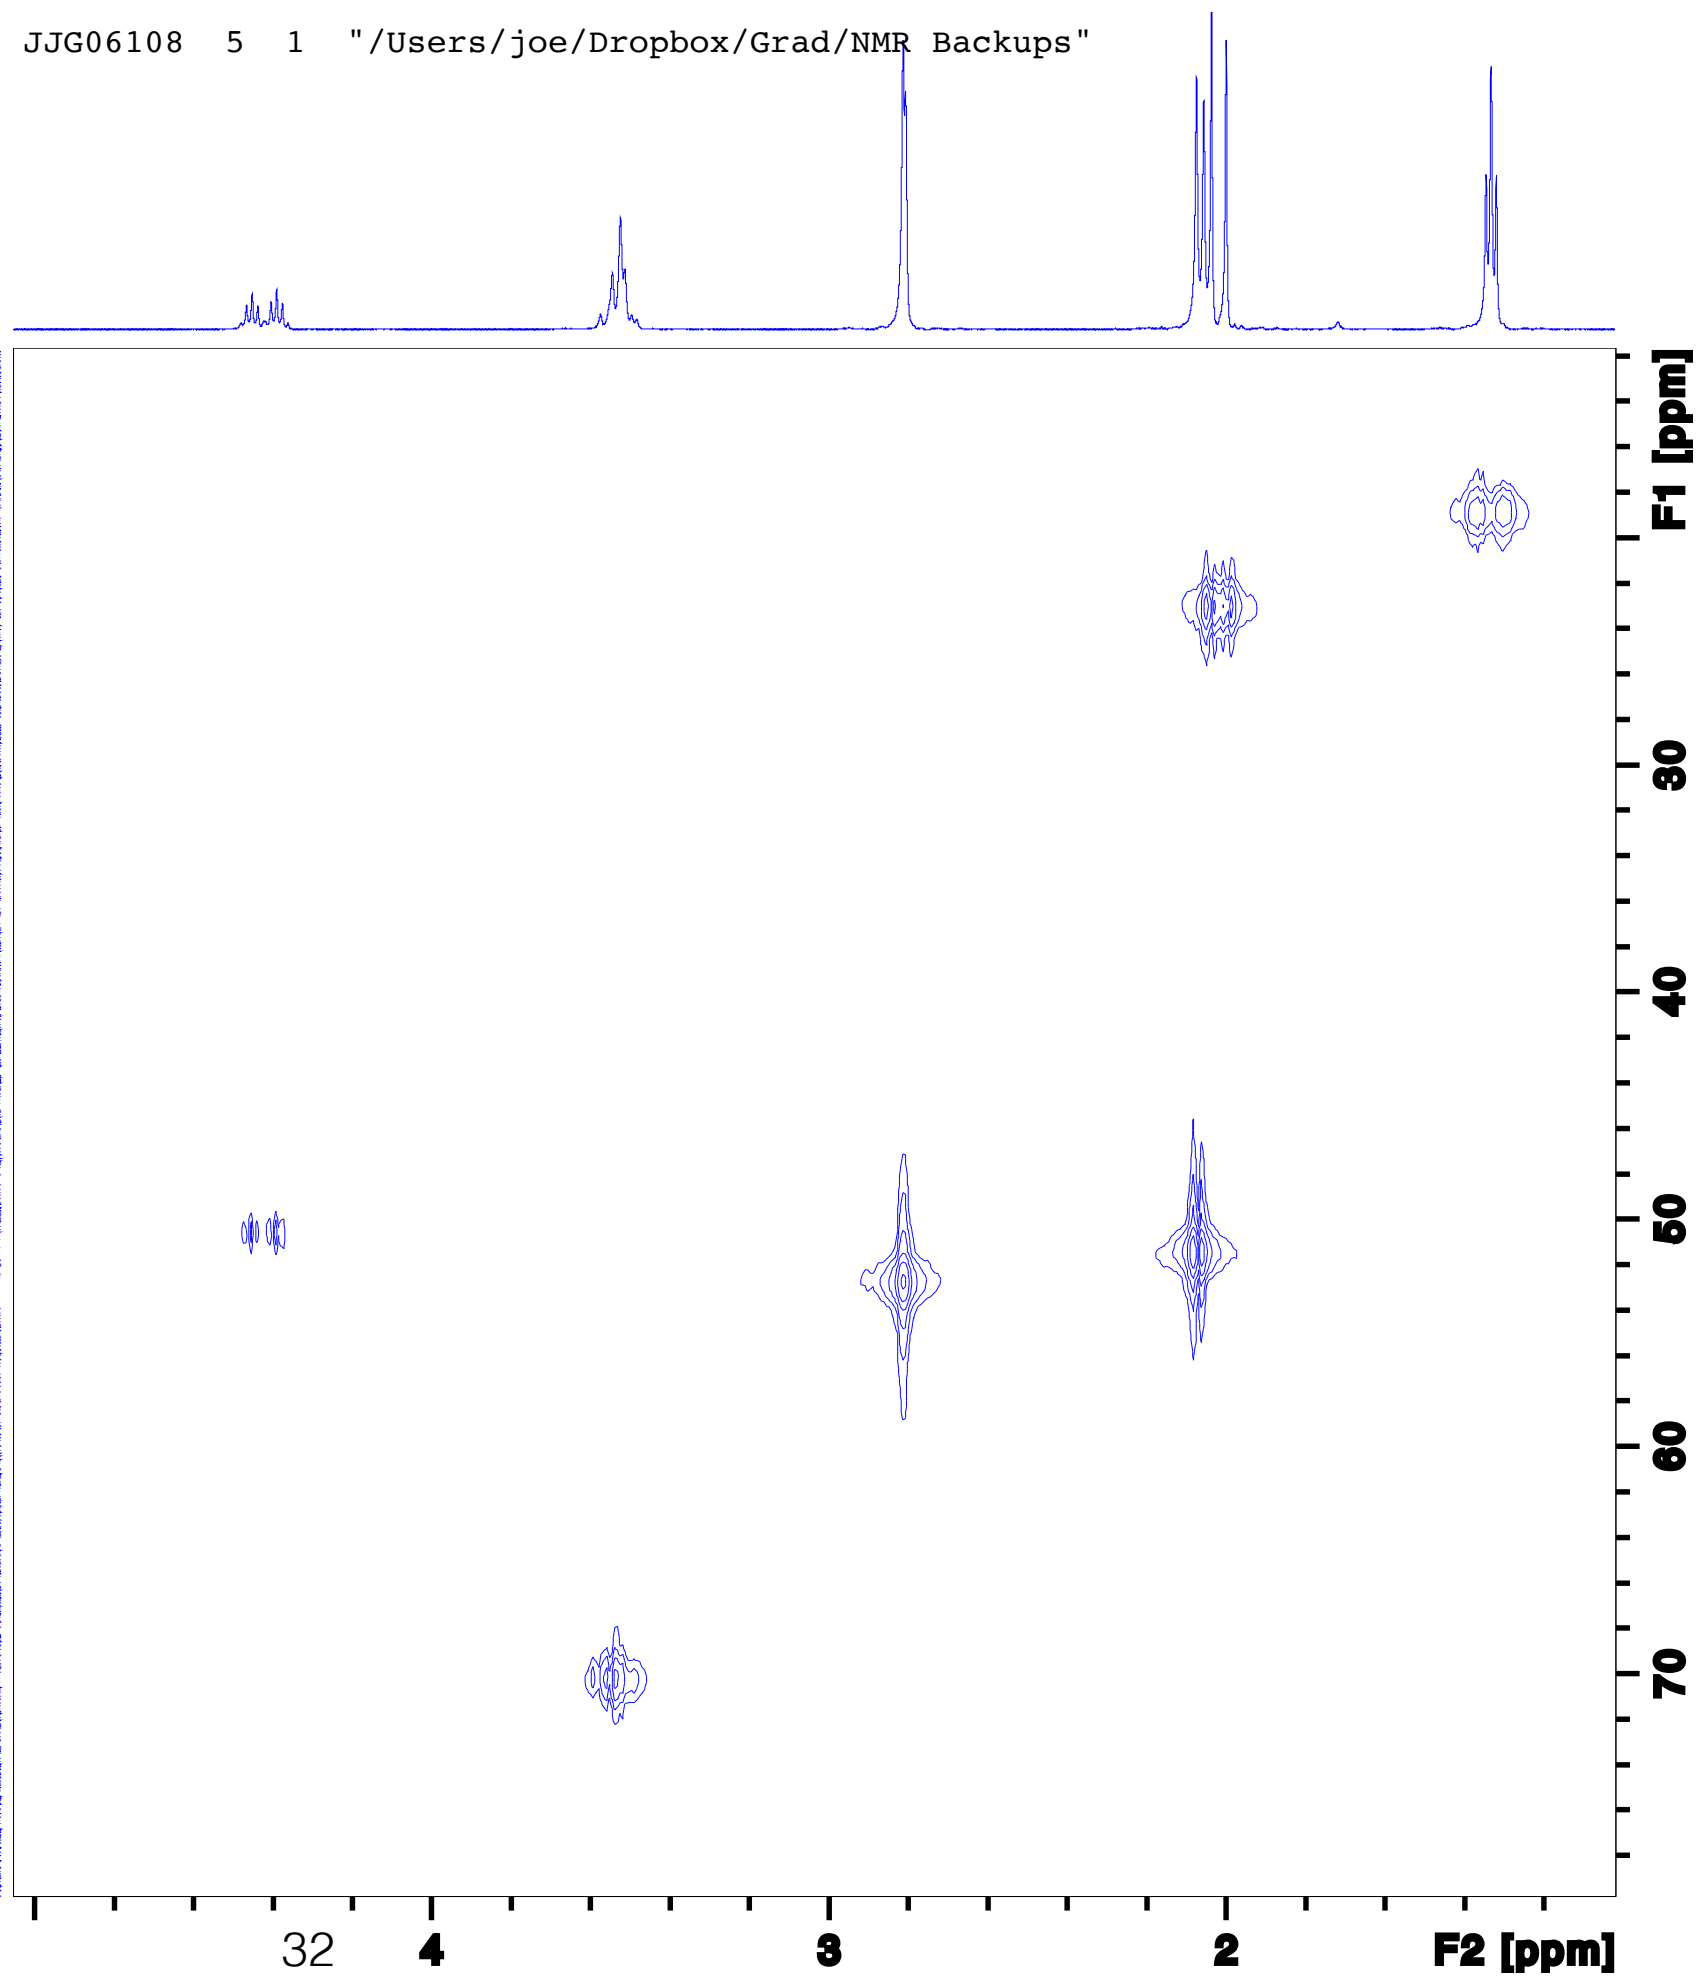

# <sup>13</sup>C aromatic

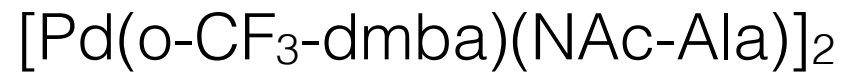

JJG06108 4 1 "/Users/joe/Dropbox/Grad/NMR Backups"

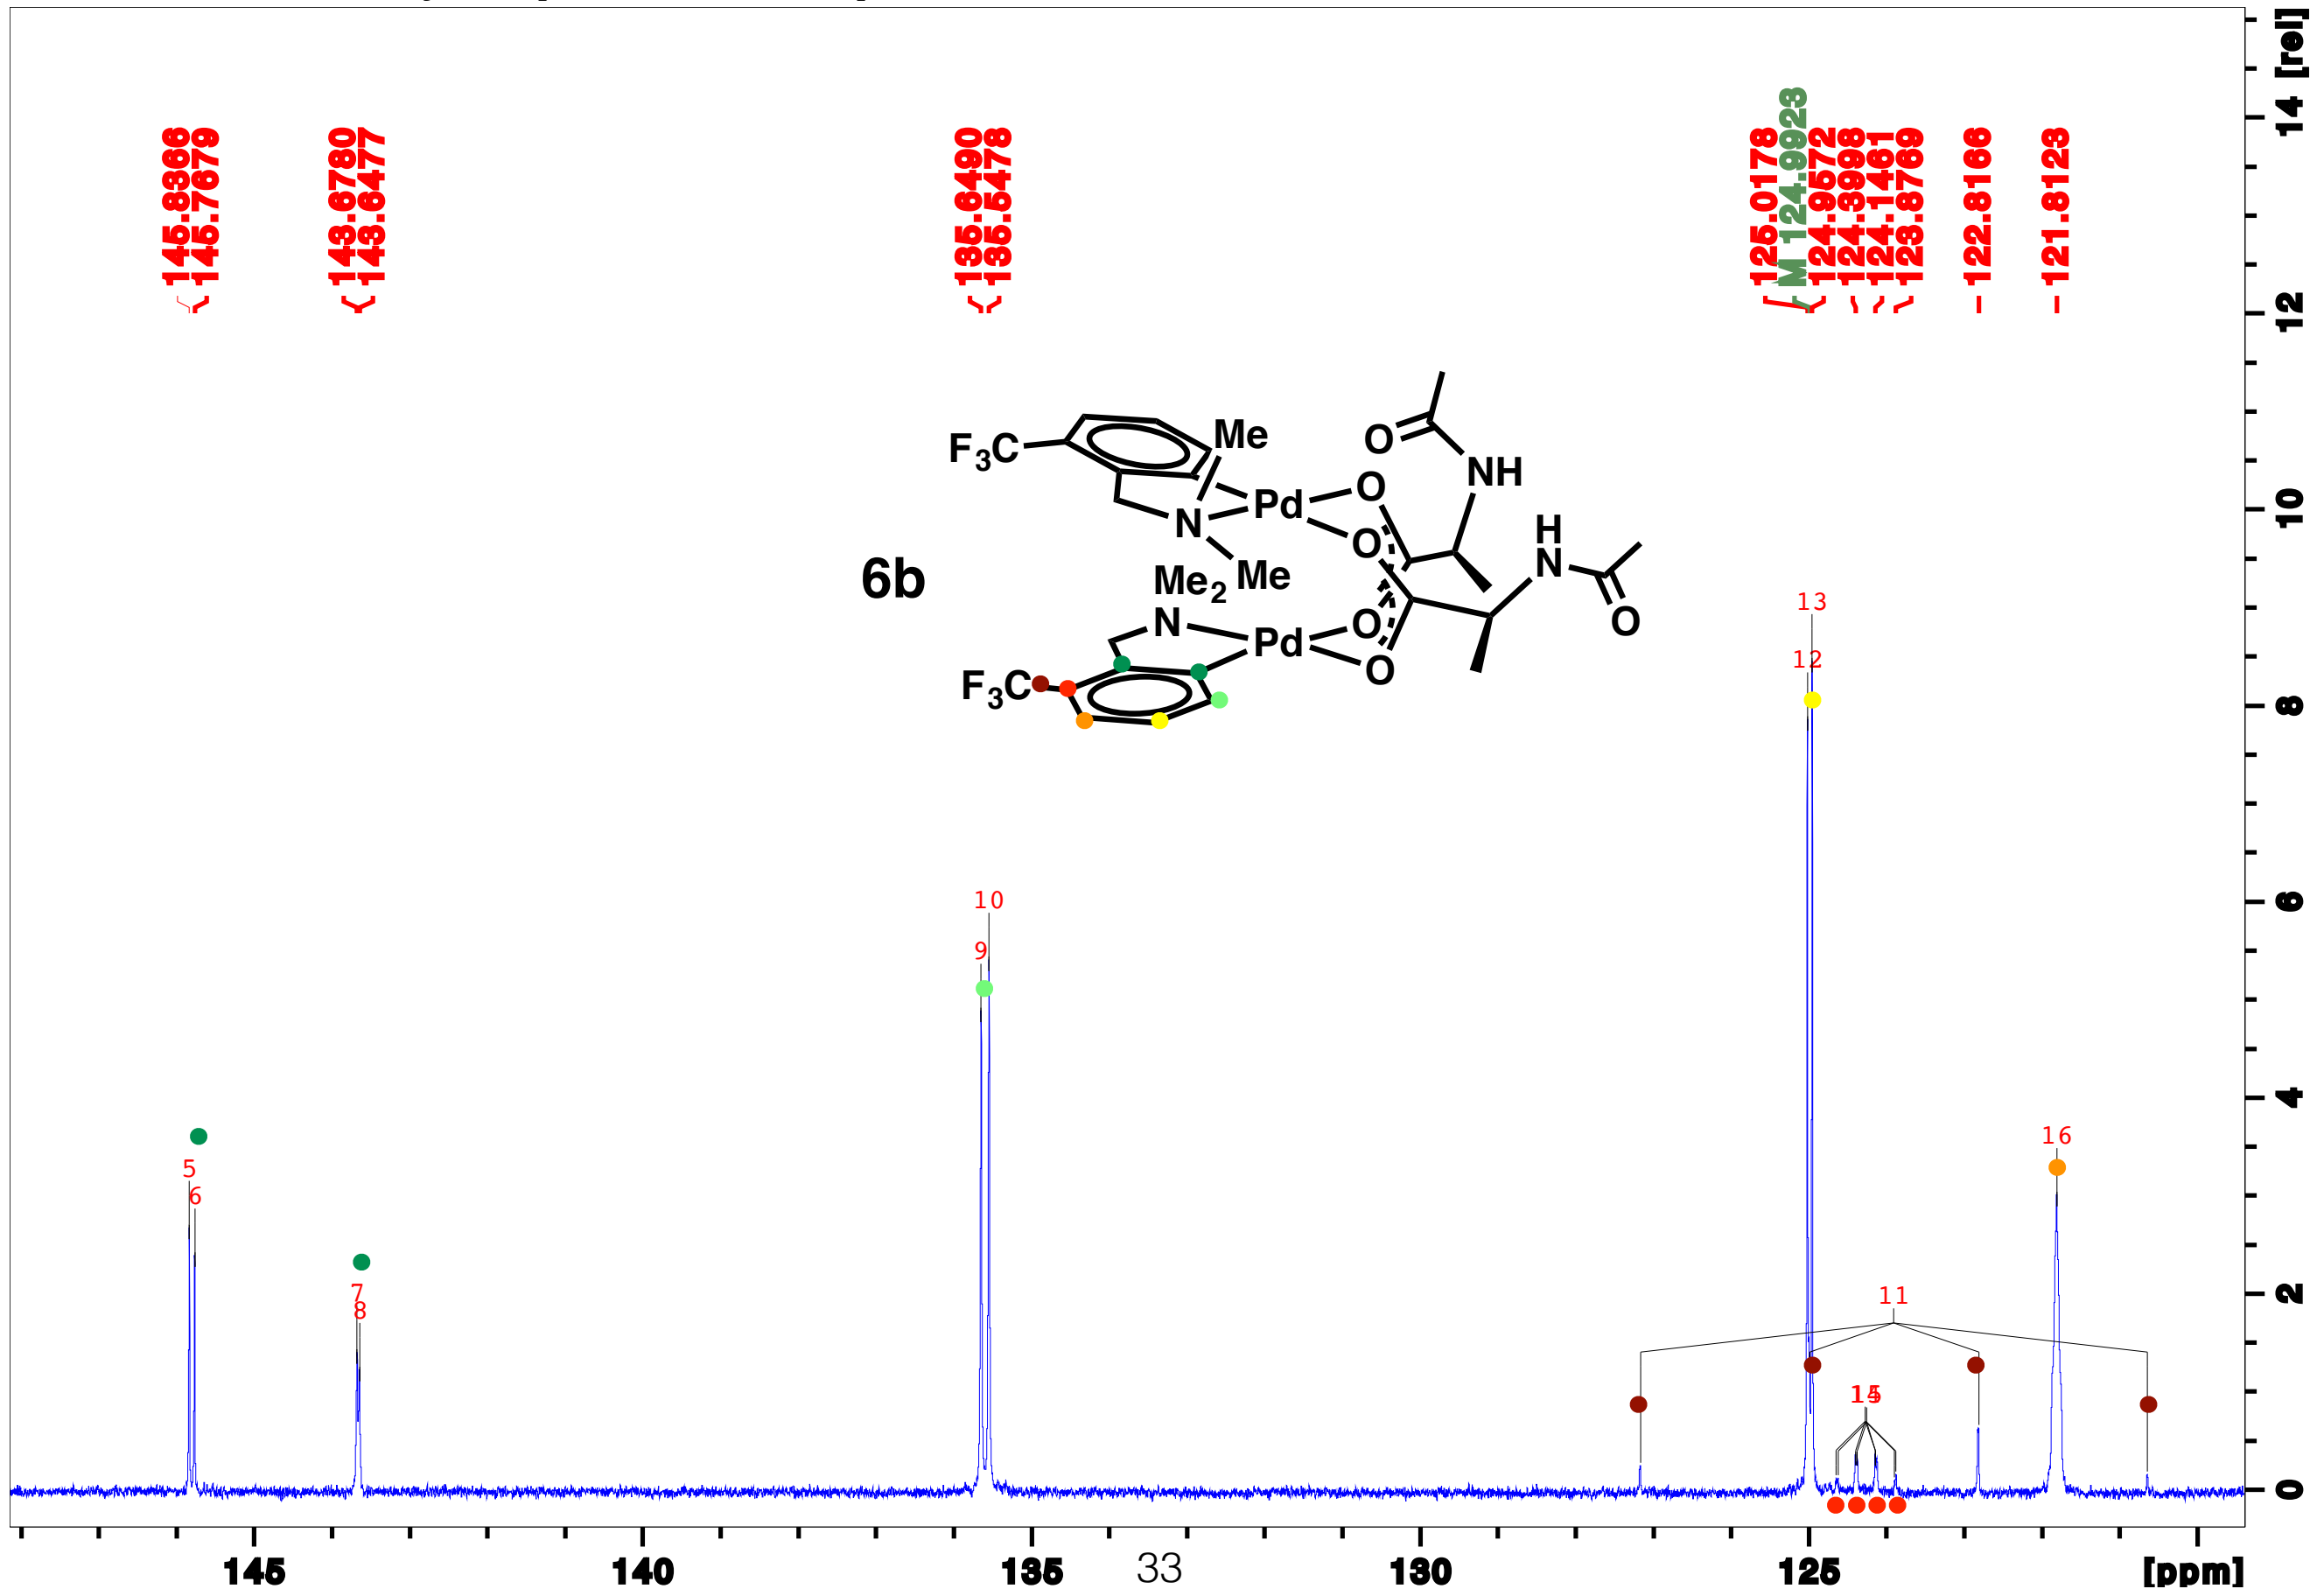

HMCQ aromatic

[Pd(o-CF<sub>3</sub>-dmba)(NAc-Ala)]<sub>2</sub>

JJG06108 5 1 "/Users/joe/Dropbox/Grad/NMR Backups"

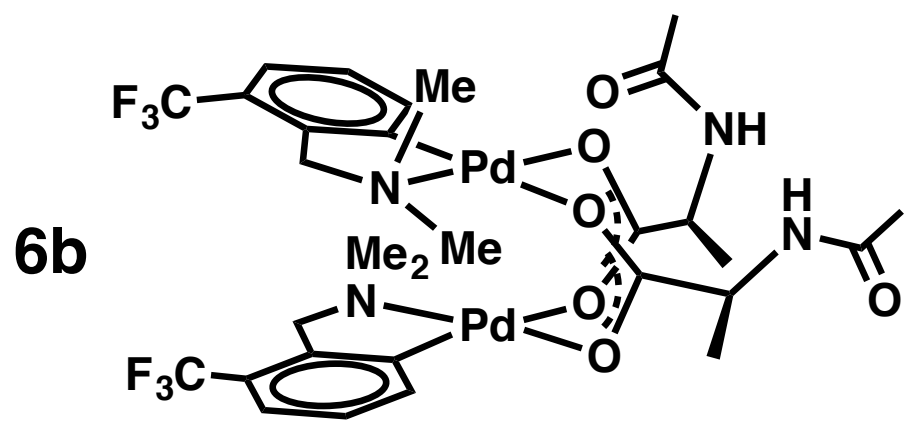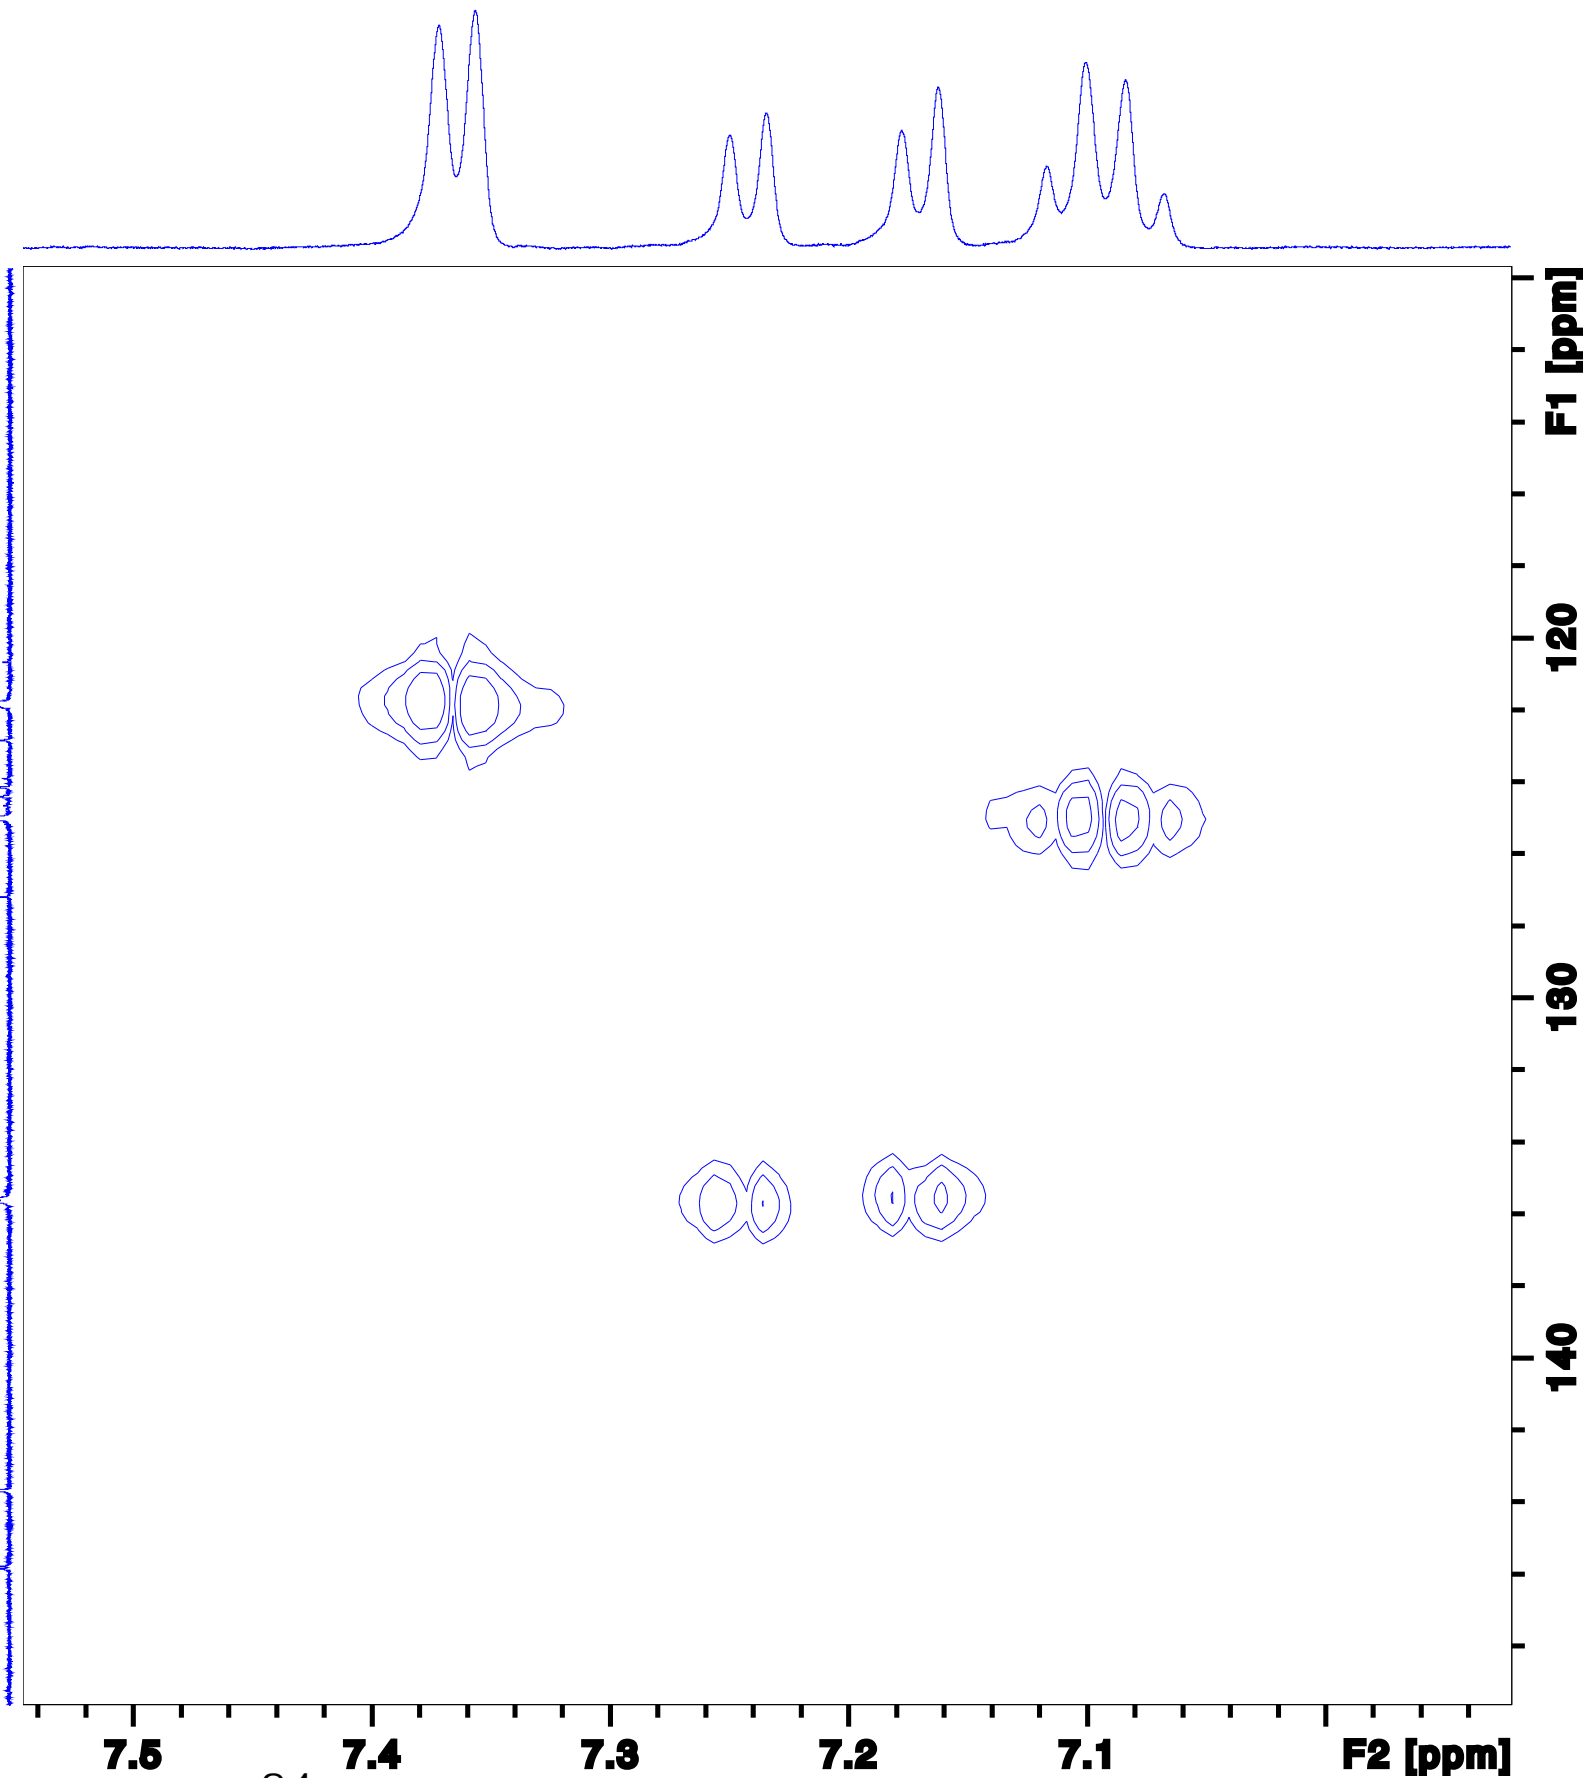

# HMCQ of inequivalent C-H's ortho to Pd

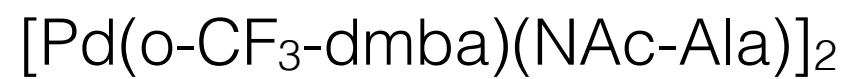

JJG06108 5 1 "/Users/joe/Dropbox/Grad/NMR Backups"

6b

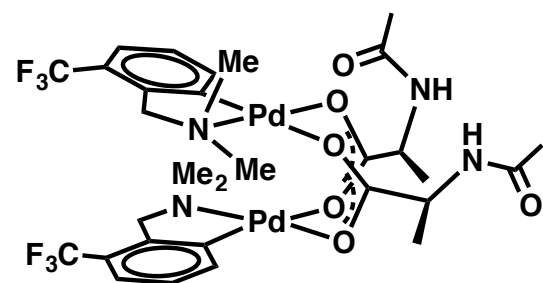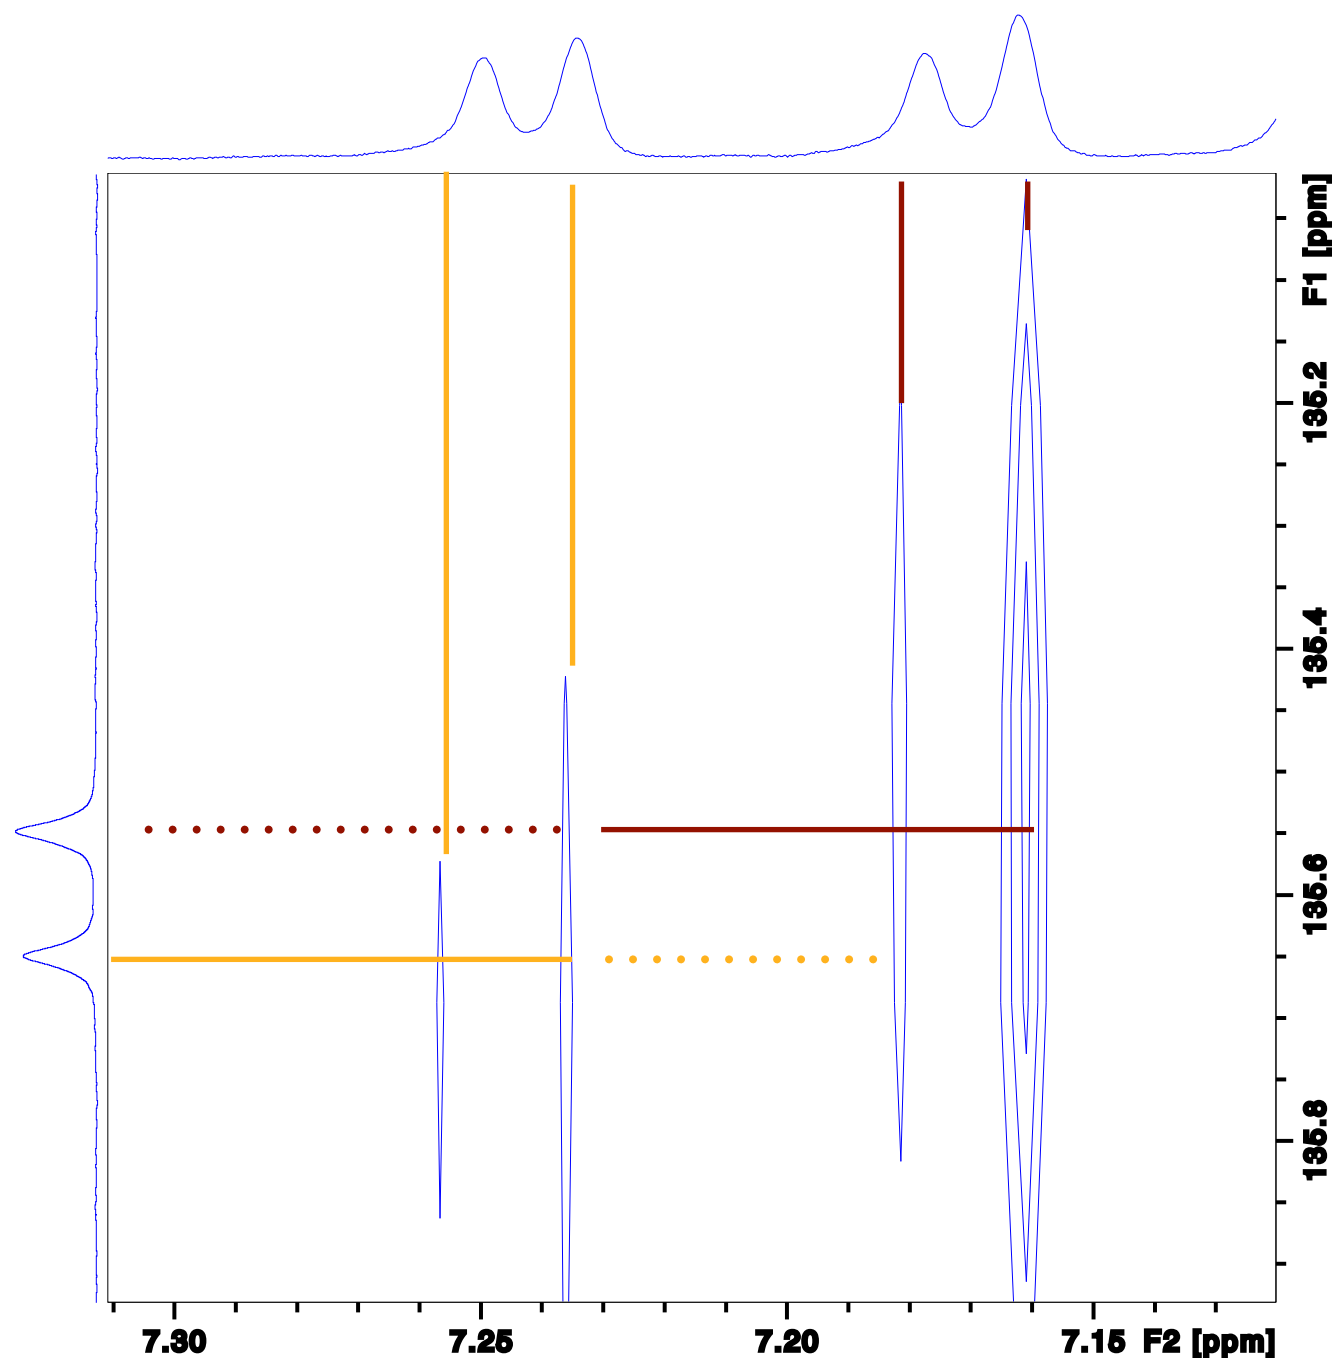

# <sup>13</sup>C carbonyls

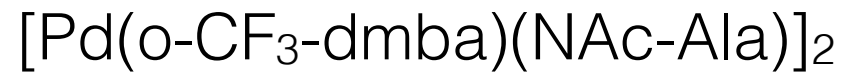

JJG06108 4 1 "/Users/joe/Dropbox/Grad/NMR Backups"

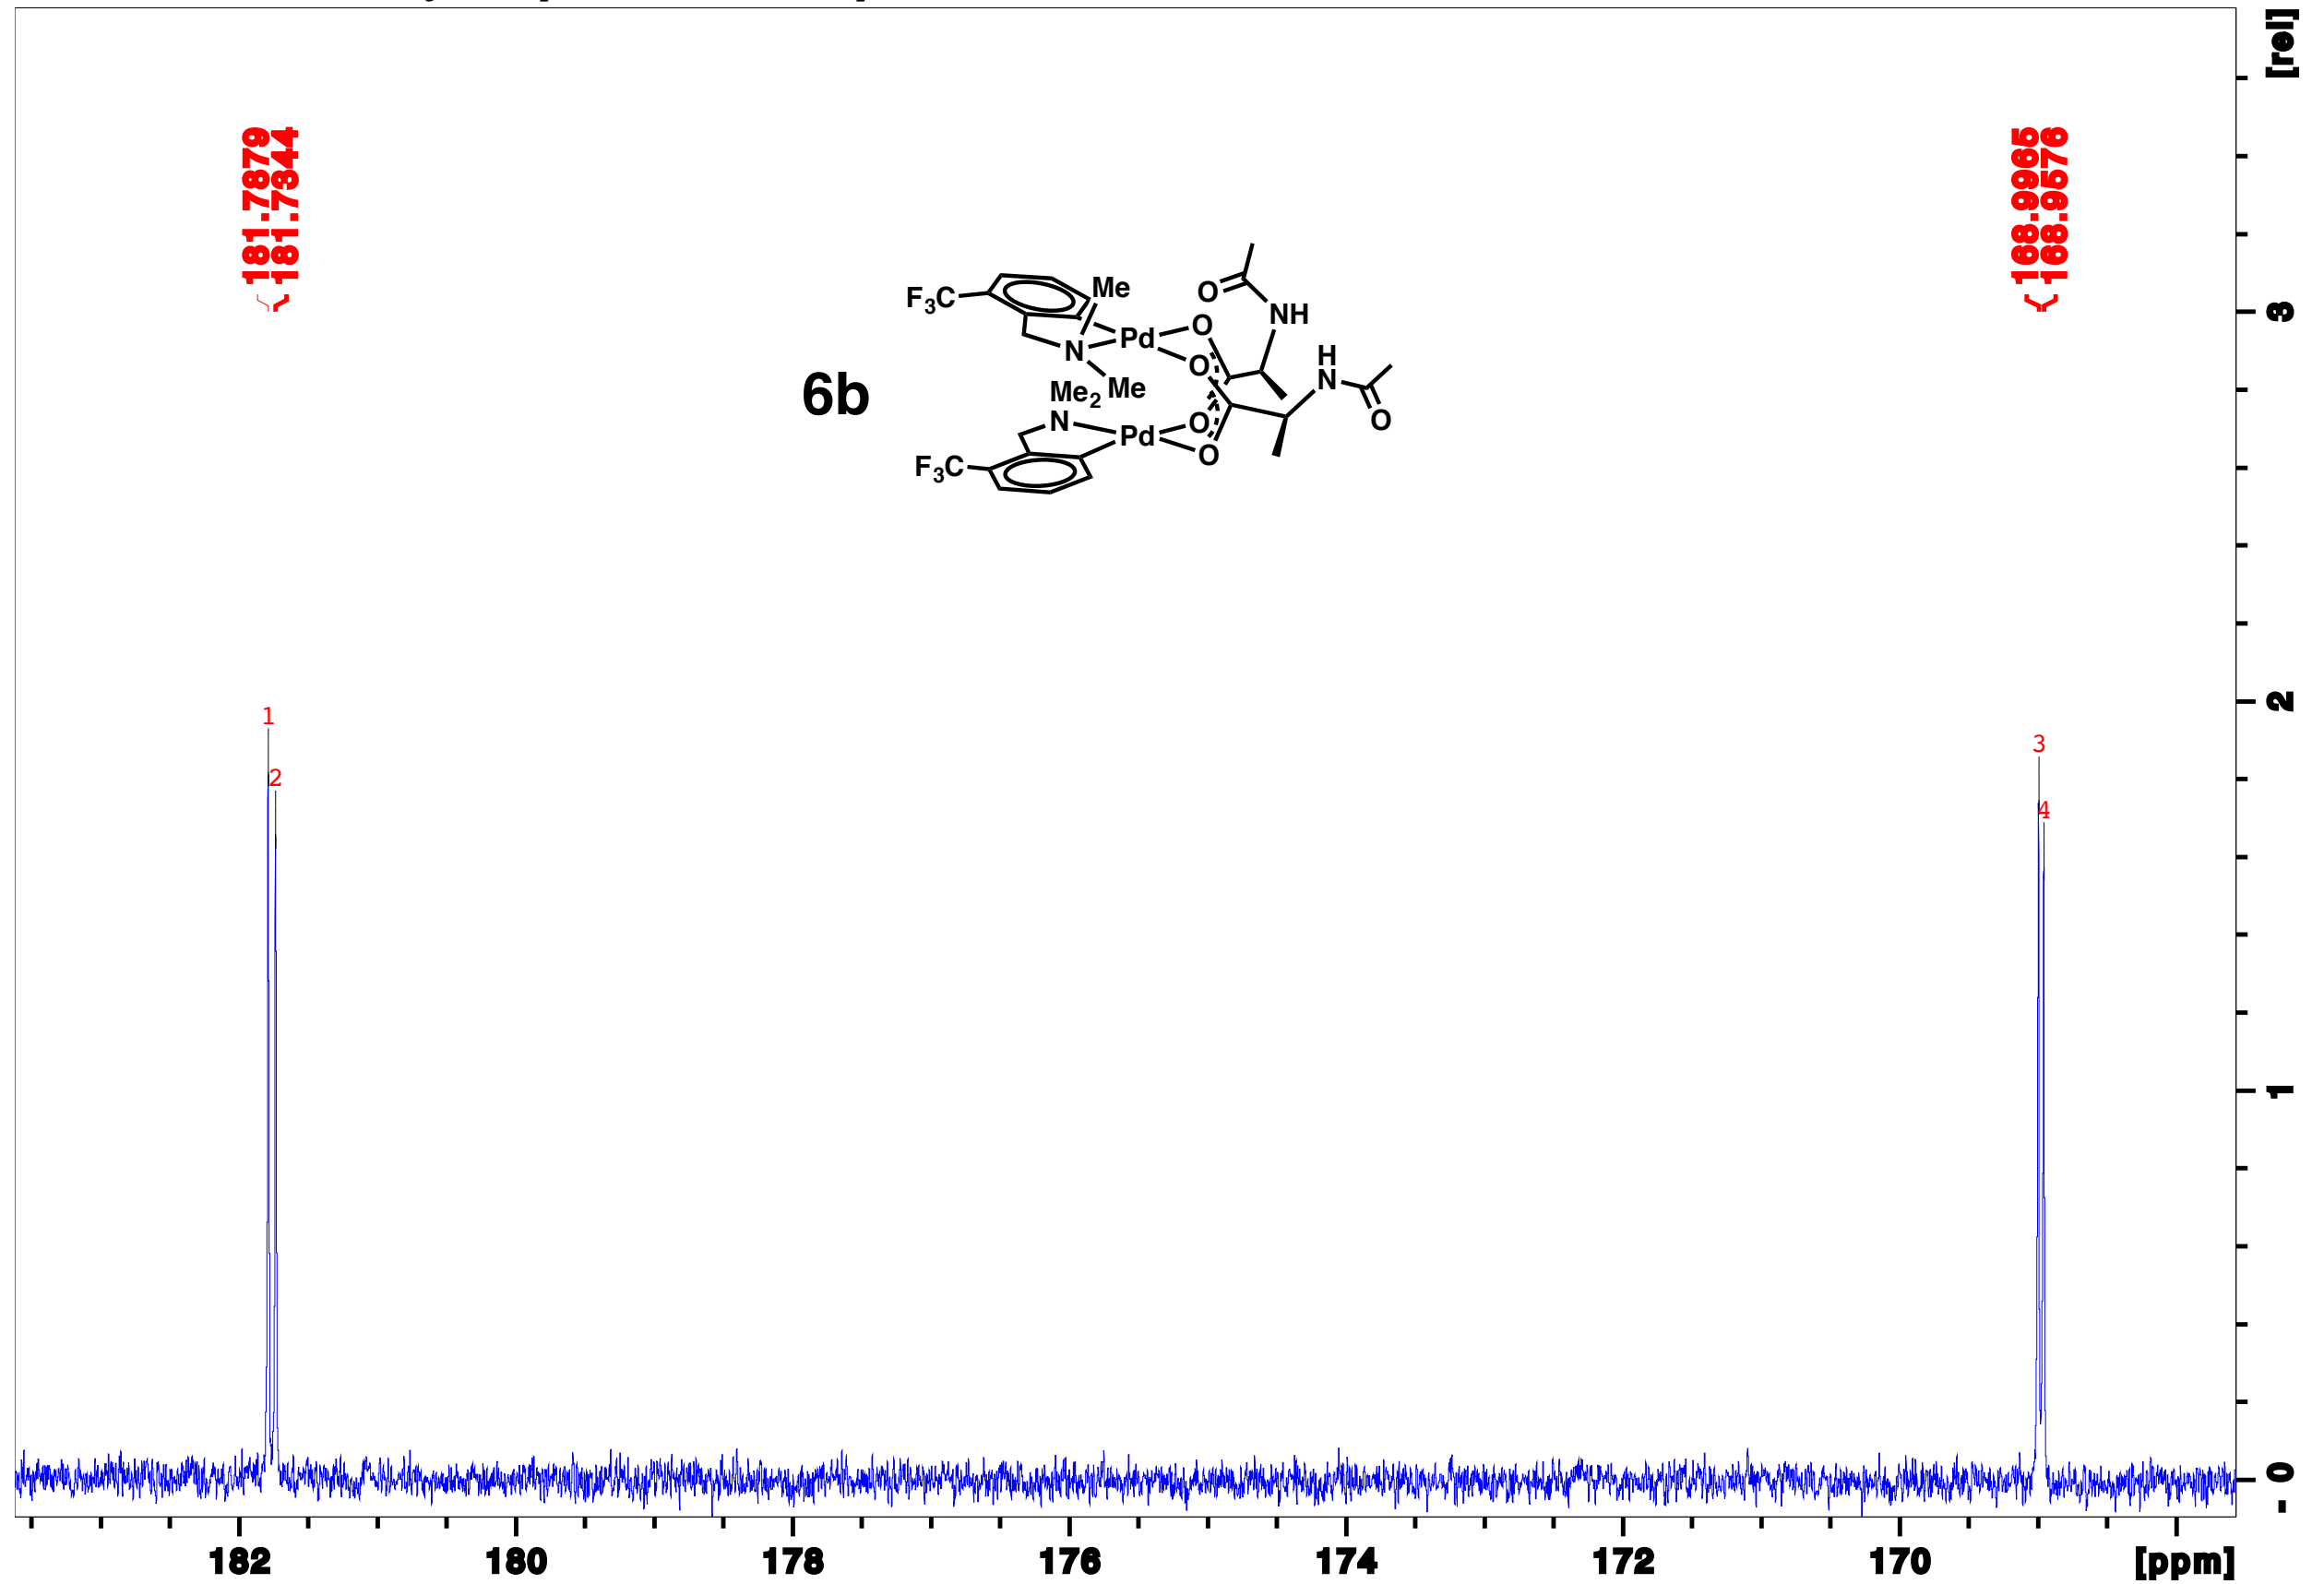



$^{19}\text{F}$  [Pd(o-CF<sub>3</sub>-dmba)(NAc-Ala)]<sub>2</sub>

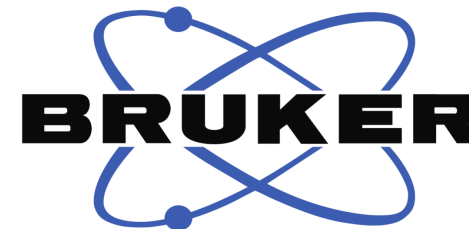

Current Data Parameters  
NAME JYG06109  
EXPNO 13  
PROCNO 1

F2 - Acquisition Parameter  
Date\_ 20160530  
Time 11.01  
INSTRUM spect  
PROBHD 5 mm PABBO BB/  
PULPROG zgflqn  
TD 703112  
SOLVENT CD2Cl2  
NS 1  
DS 0  
SWH 117187.500 Hz  
FIDRES 0.166670 Hz  
AQ 2.9999444 sec  
RG 499.75  
DW 4.267 usec  
DE 6.50 usec  
TE 295.5 K  
D1 3.00000000 sec  
TD0 1

===== CHANNEL f1 =====  
SFO1 470.3185714 MHz  
NUC1 19F  
P1 14.80 usec  
PLW1 37.79999924 W

F2 - Processing parameters  
SI 262144  
SF 470.3477328 MHz  
WDW no  
SSB 0  
LB 0 Hz  
GB 0  
PC 1.00

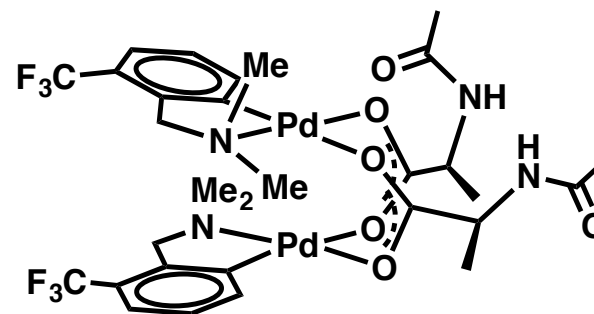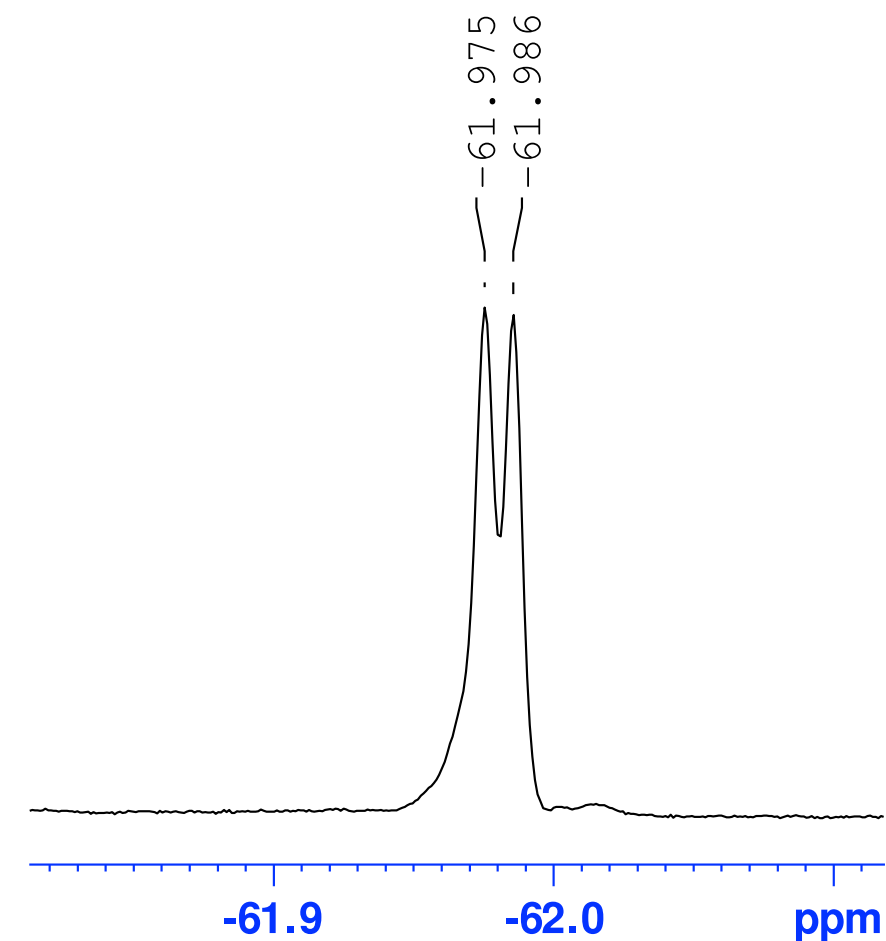

-61.975  
-61.986

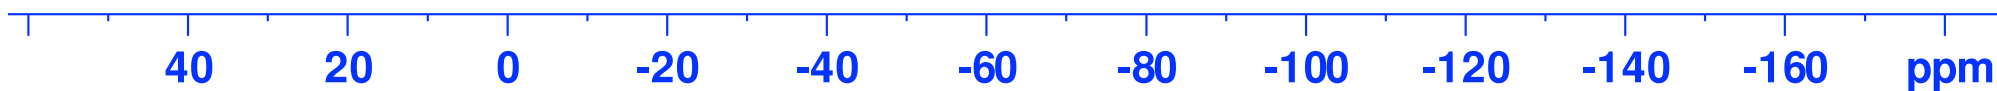

Current Data Parameters

NAME JJG09032

EXPNO 7

PROCNO 1

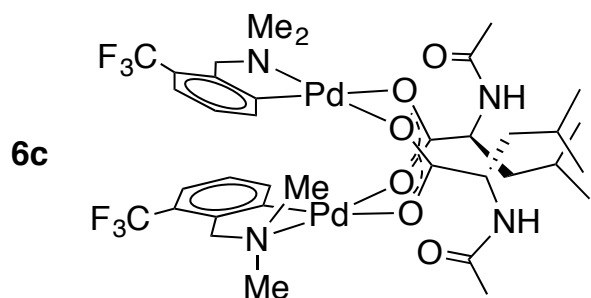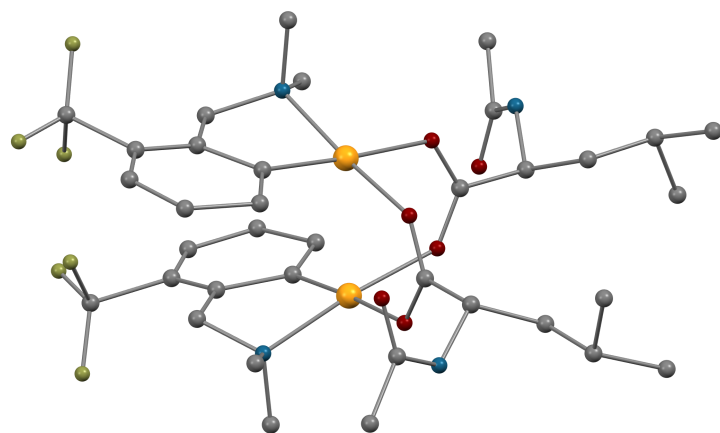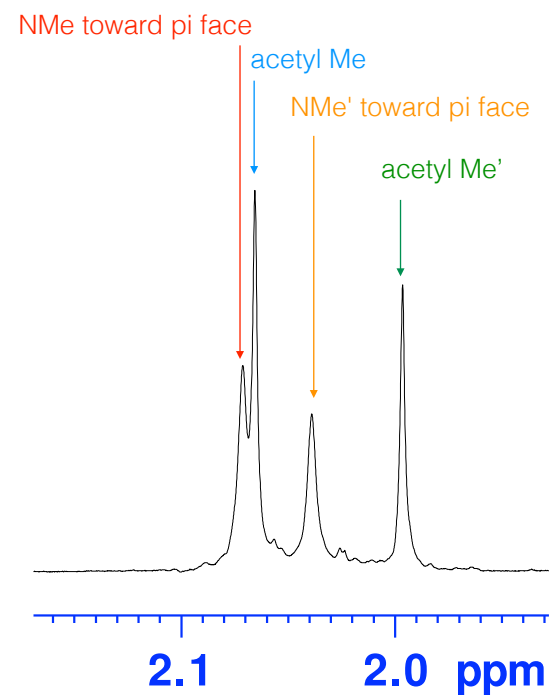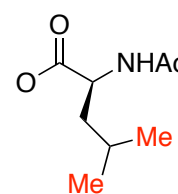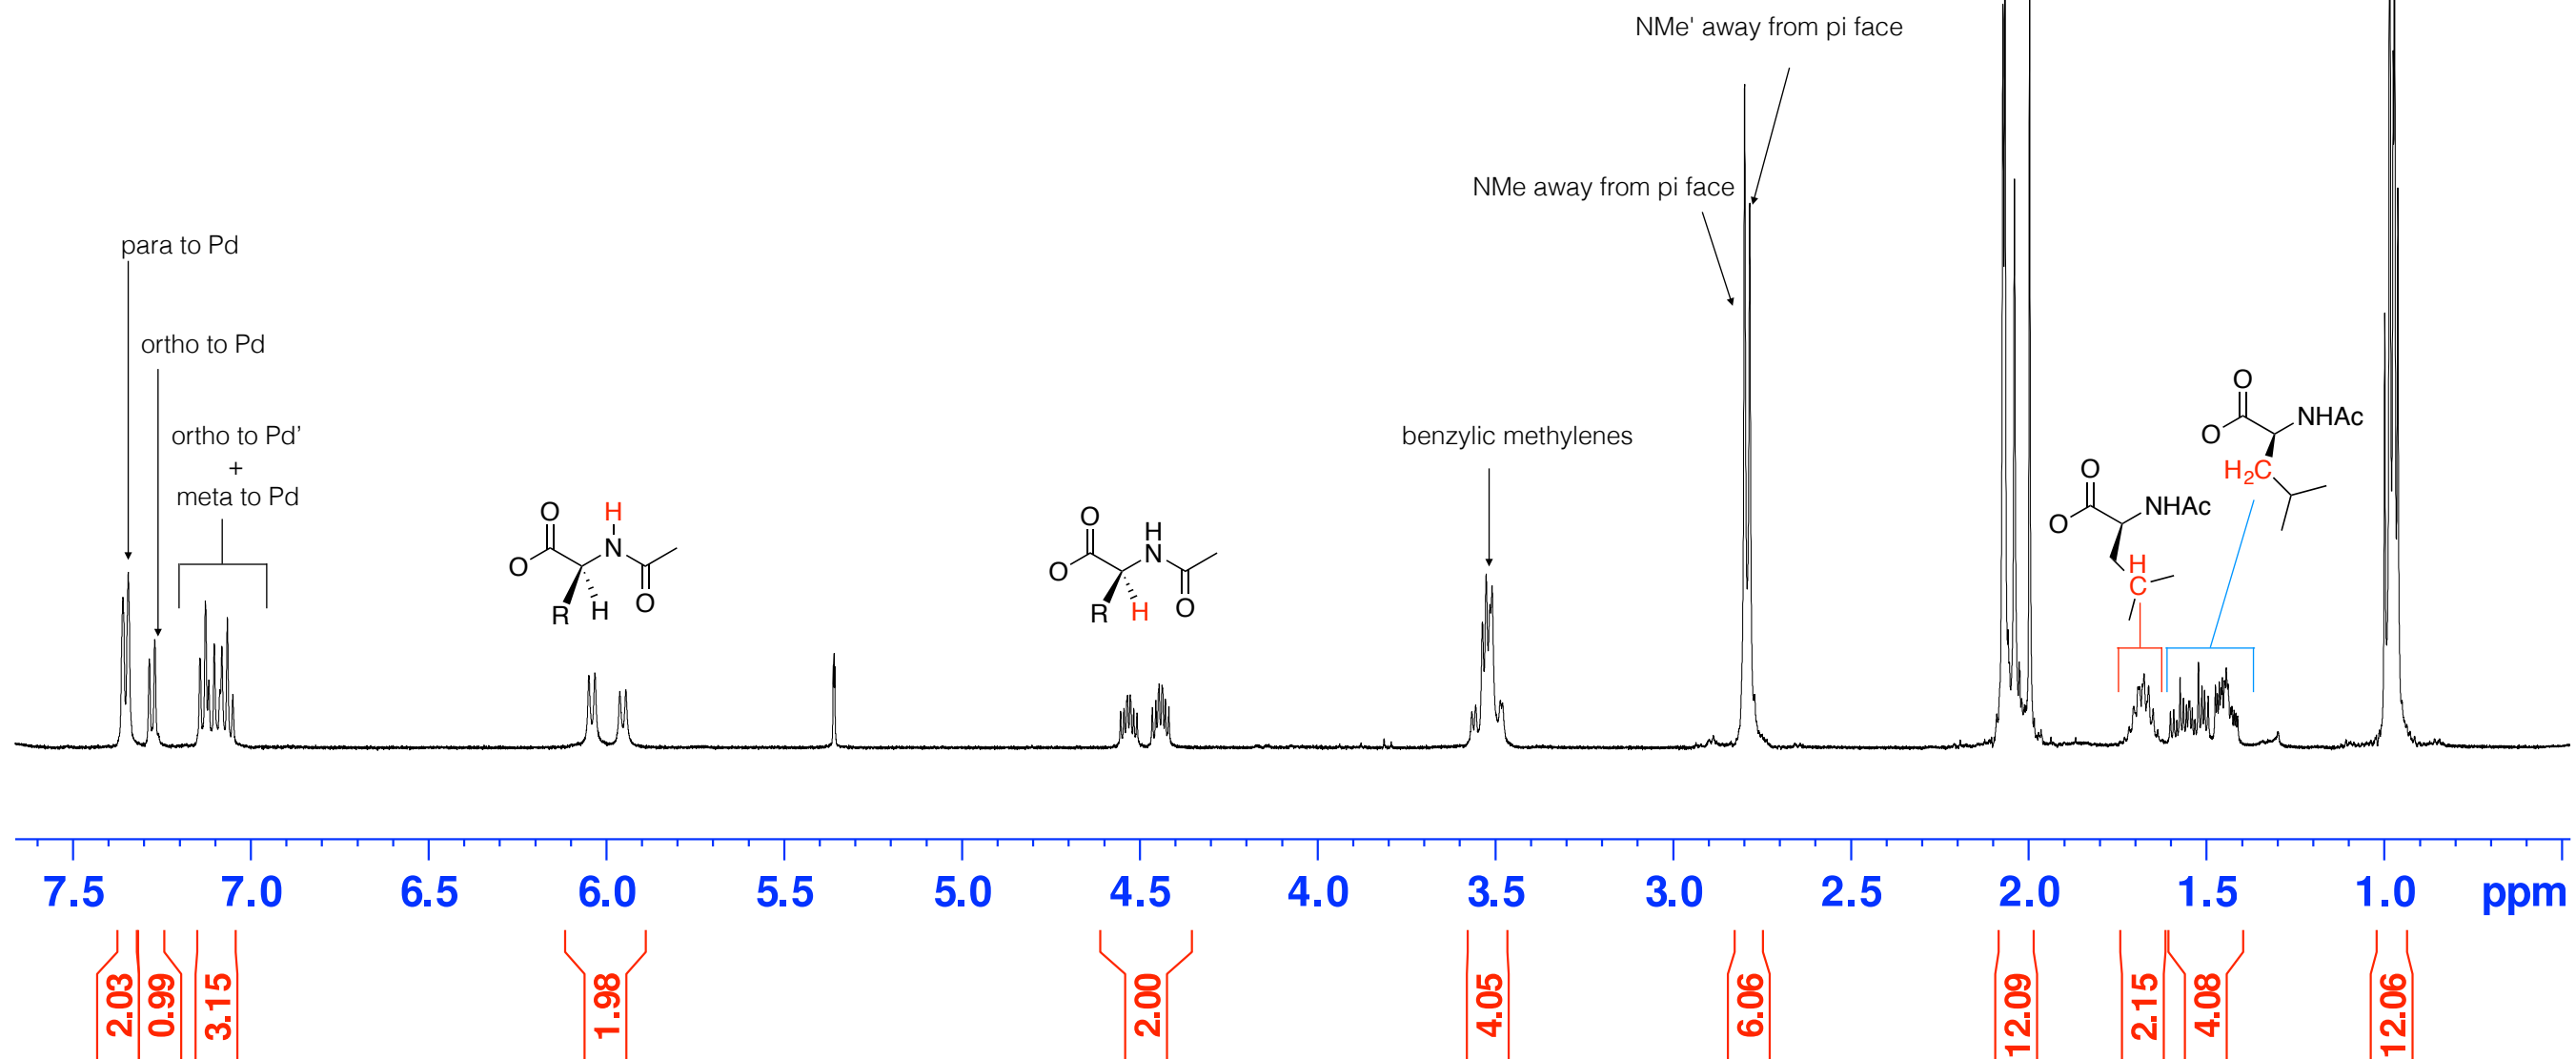

COSY [Pd(CF<sub>3</sub>-dmba)(NAc-Leu)]<sub>2</sub>

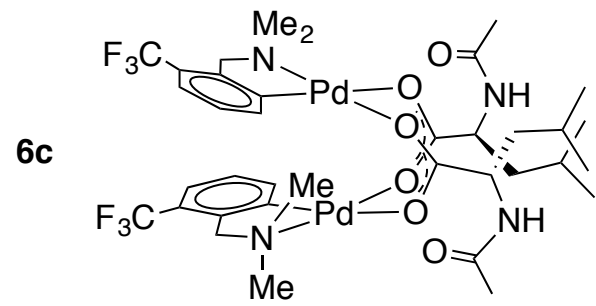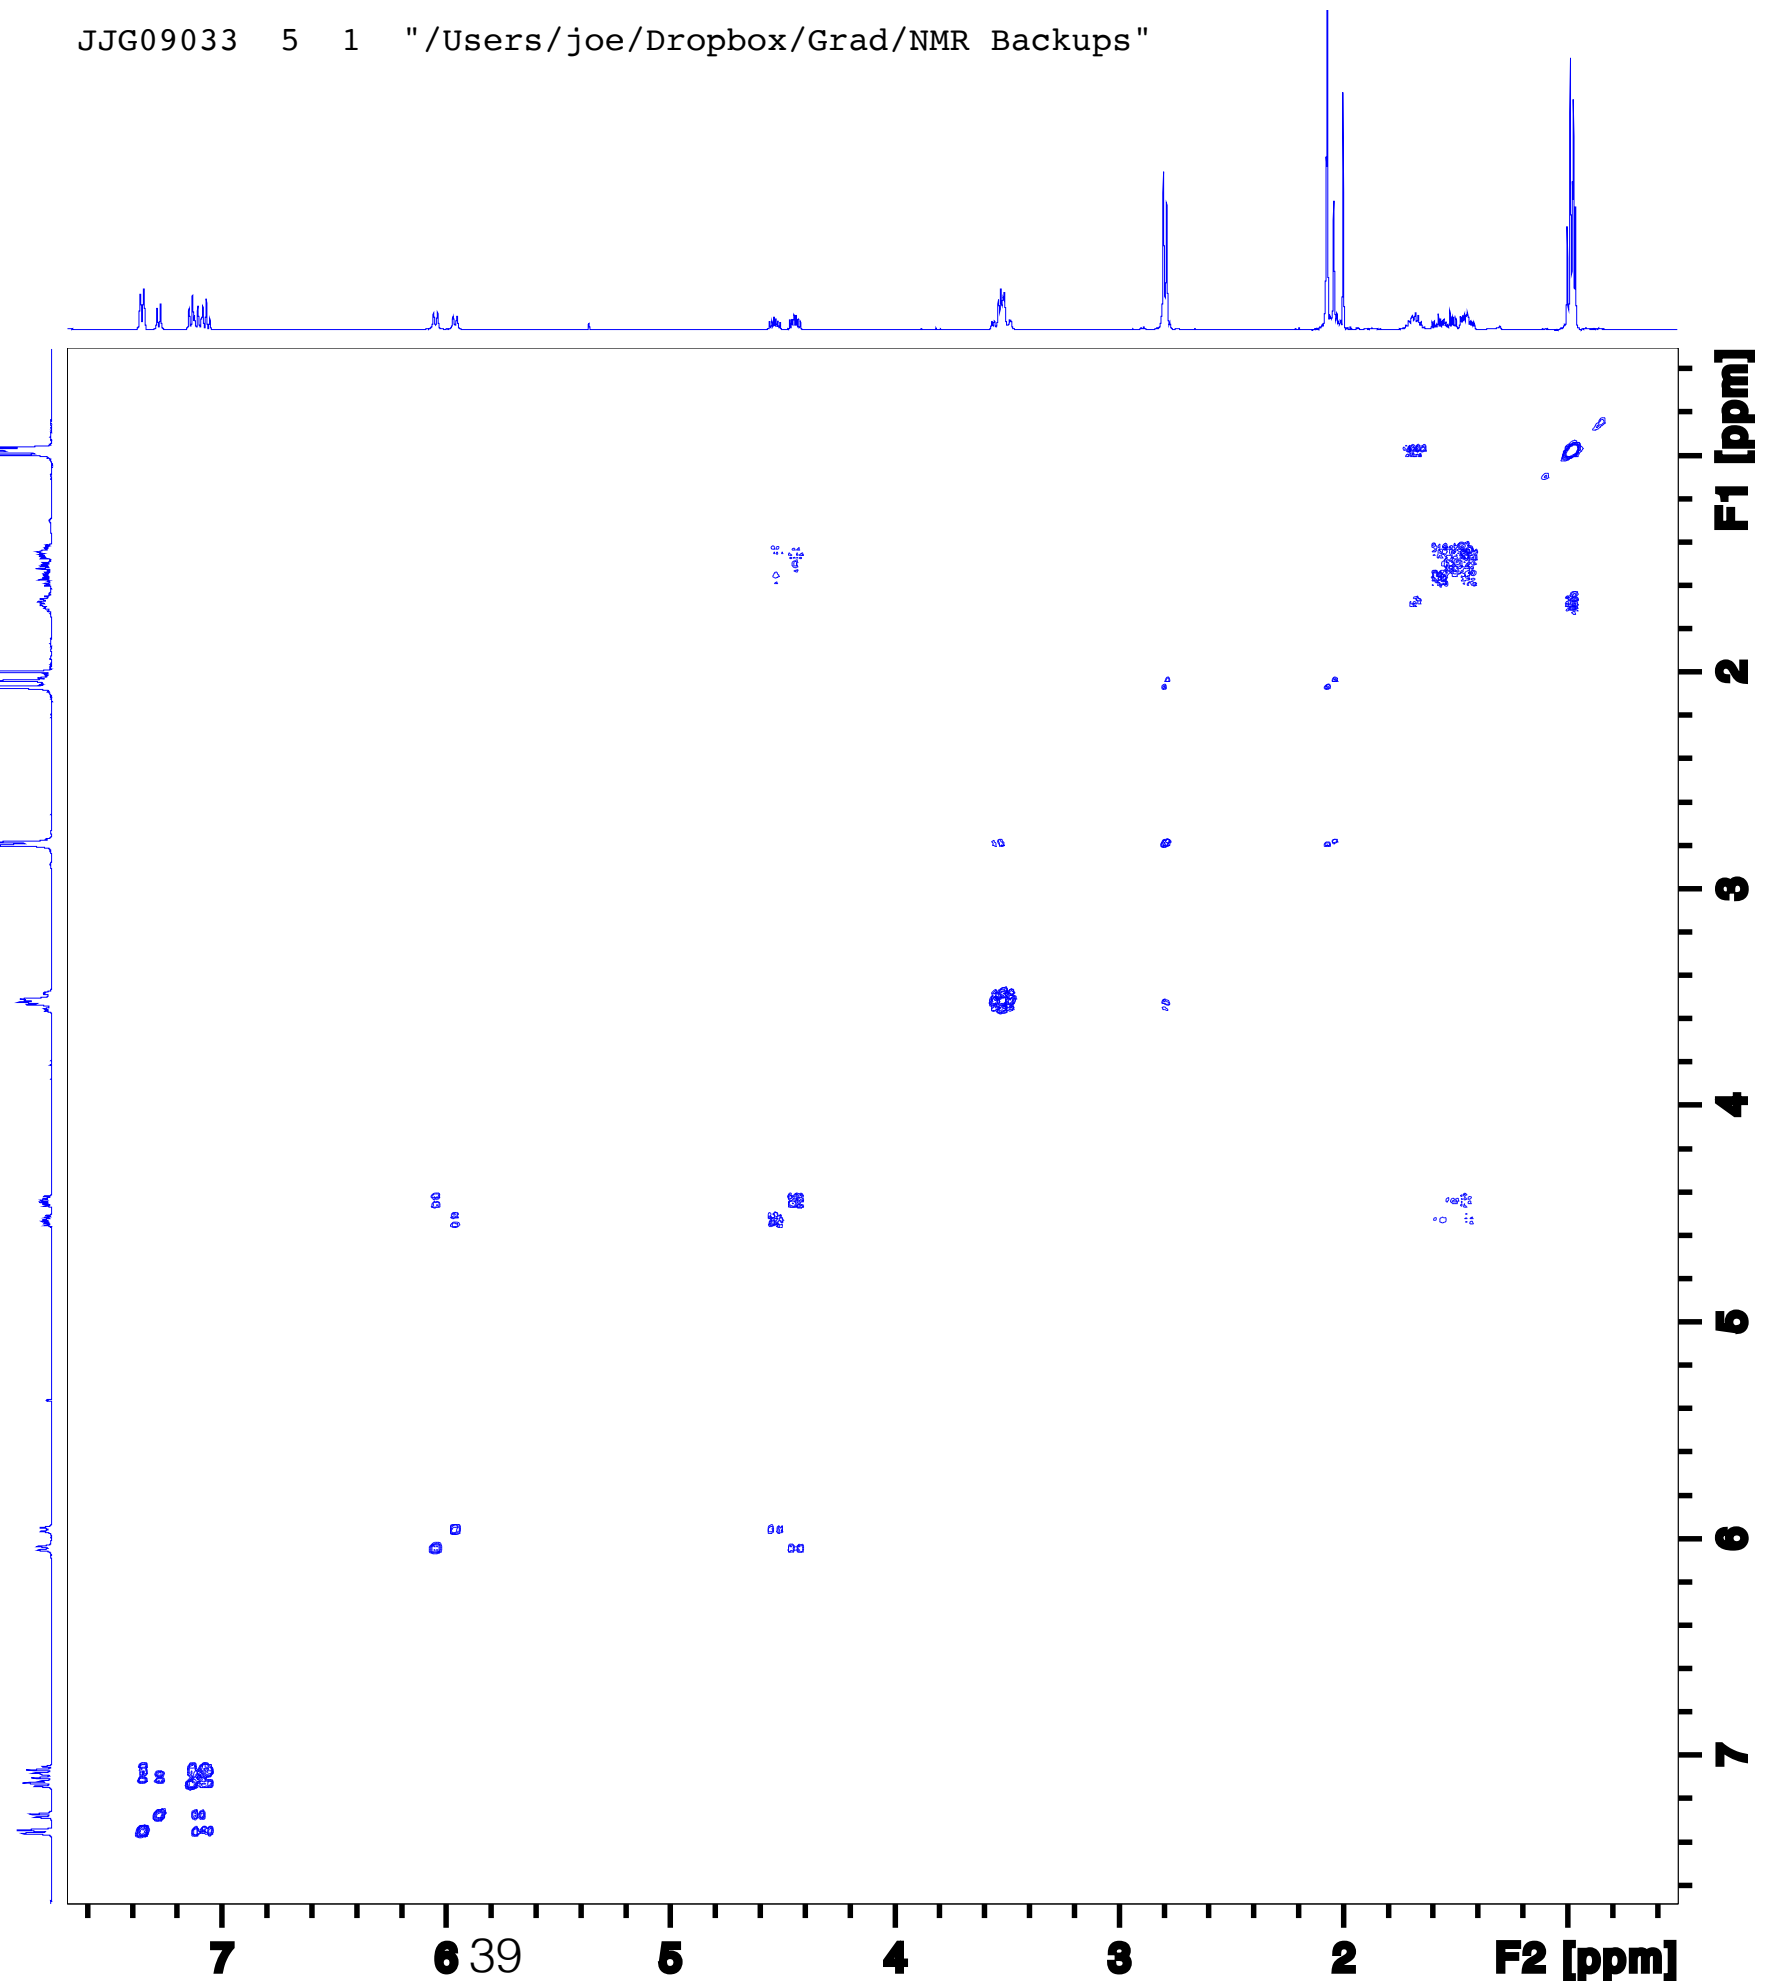

COSY [Pd(CF<sub>3</sub>-dmba)(NAC-Leu)]<sub>2</sub>  
inequivalent pairs of NMe's

JJG09033 5 1 "/Users/joe/Dropbox/Grad/NMR Backups"

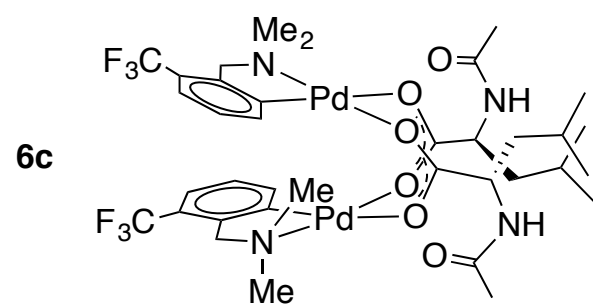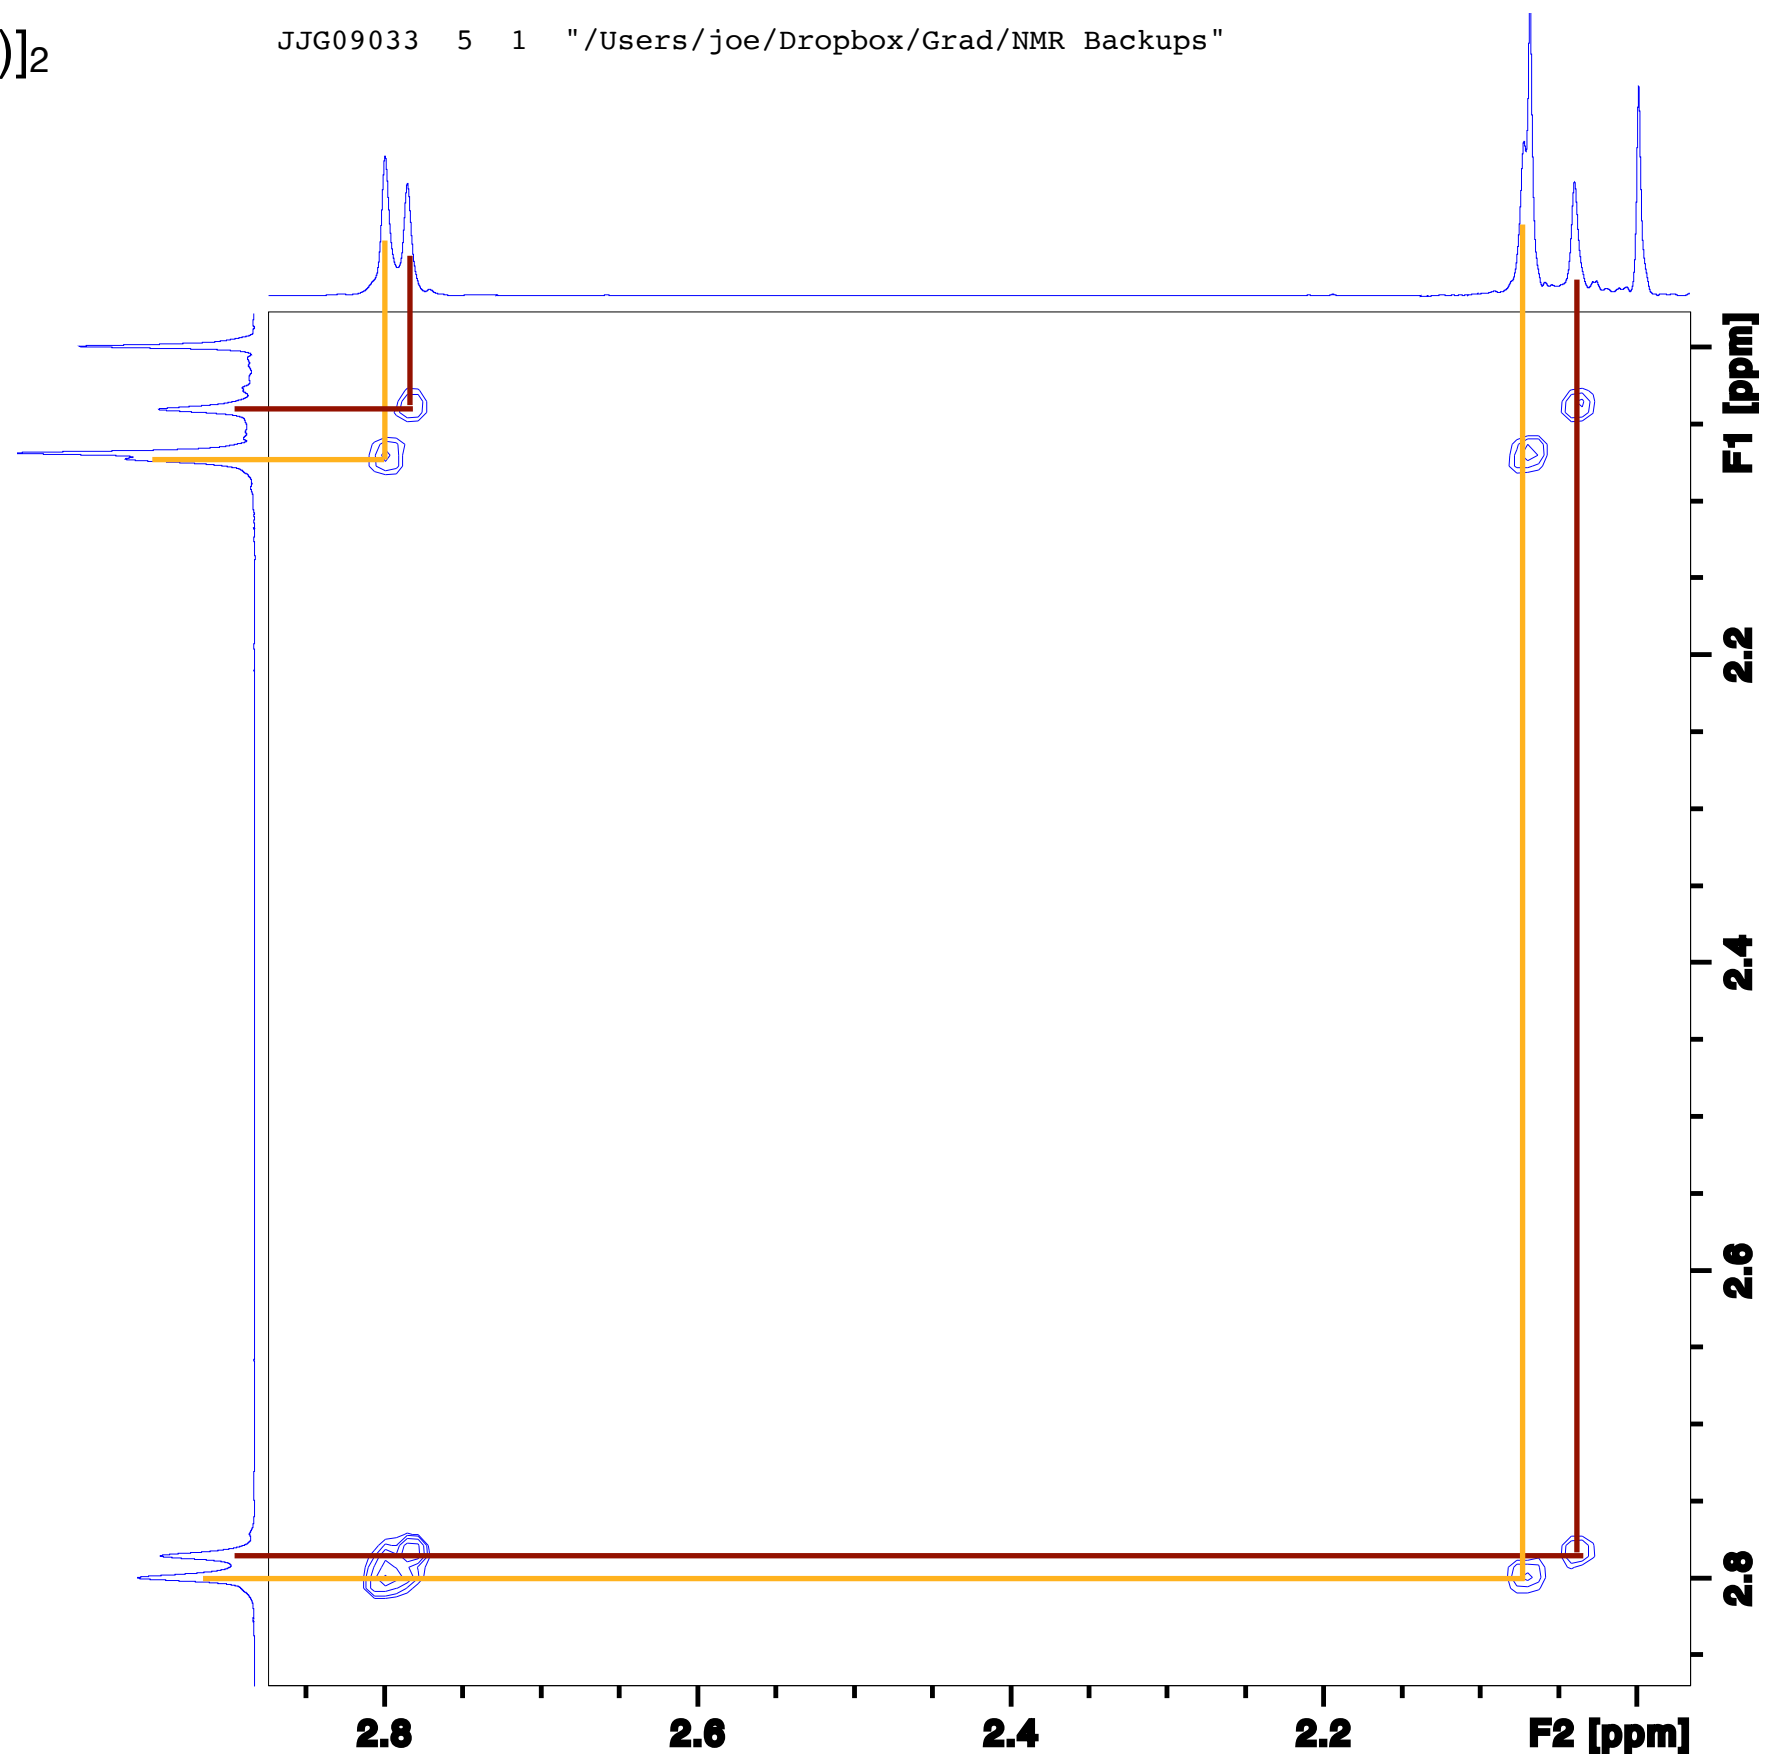

NOESY [Pd(CF<sub>3</sub>-dmba)(NAc-Leu)]<sub>2</sub>

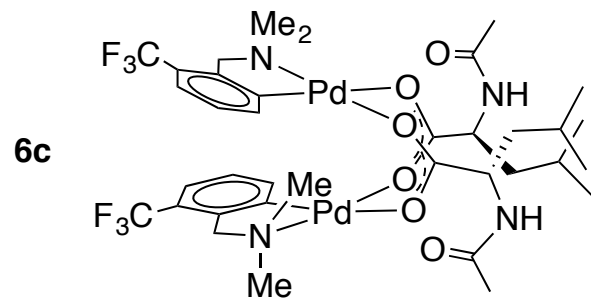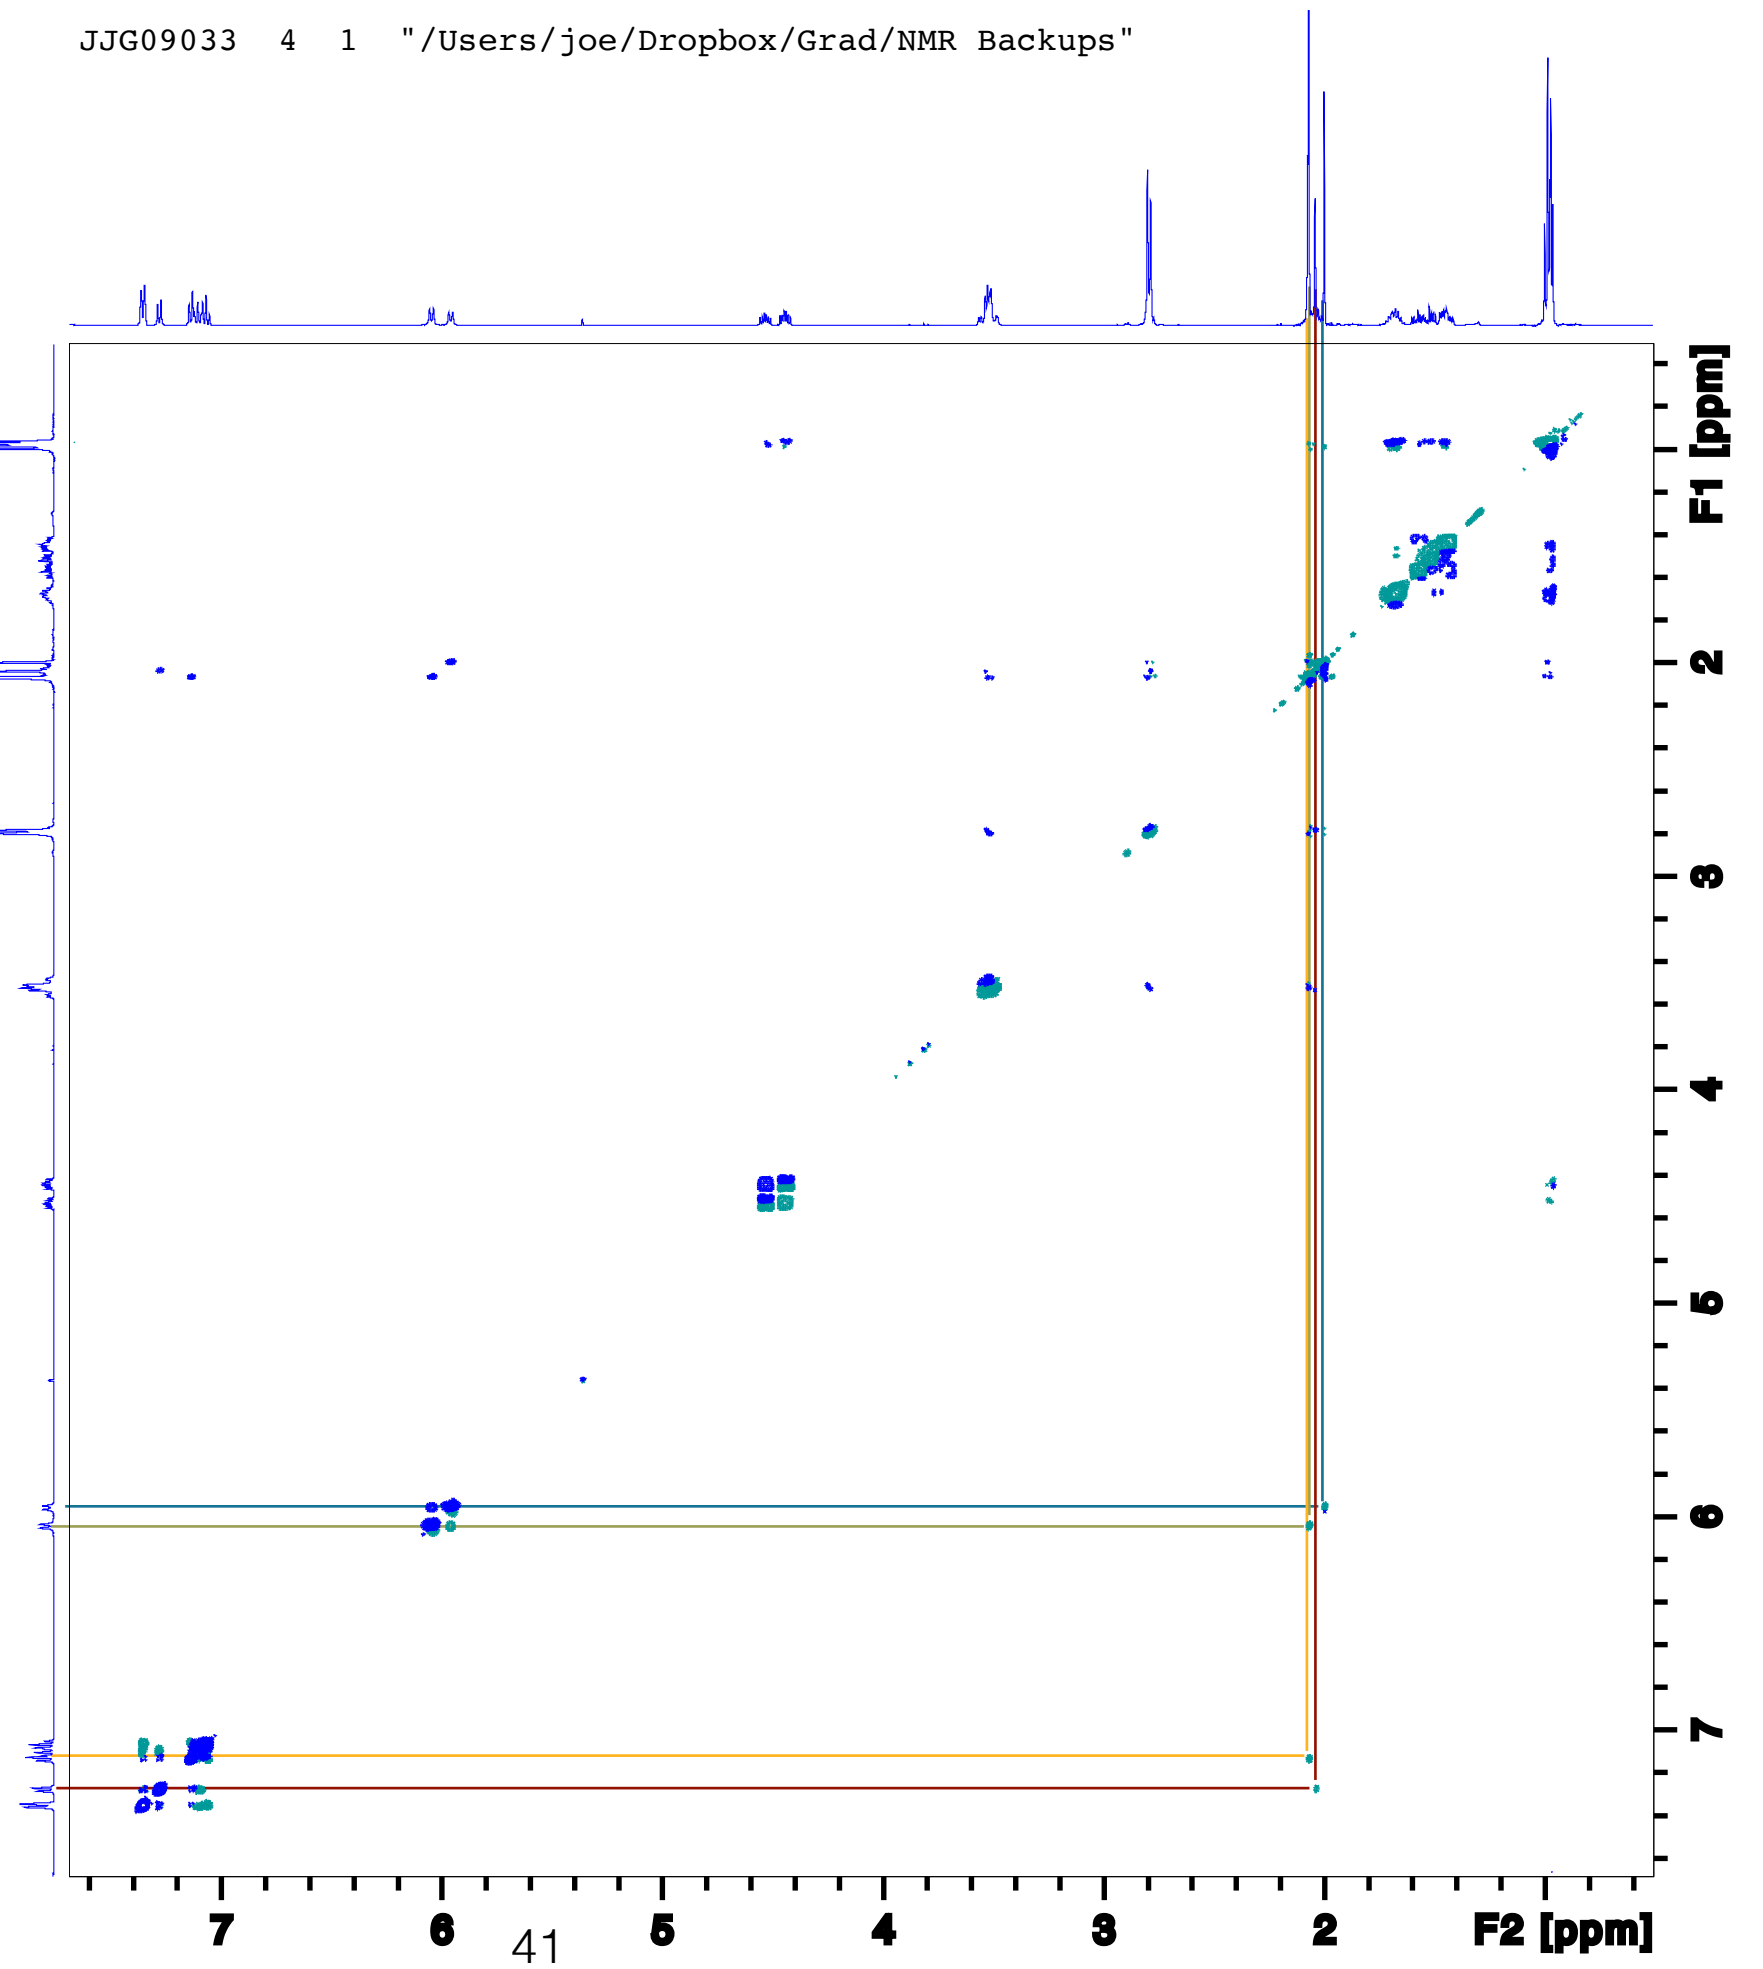

Key NOE cross peaks  
 [Pd(CF<sub>3</sub>-dmba)(NAC-Leu)]<sub>2</sub>

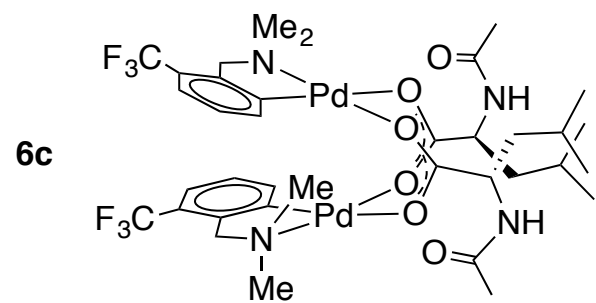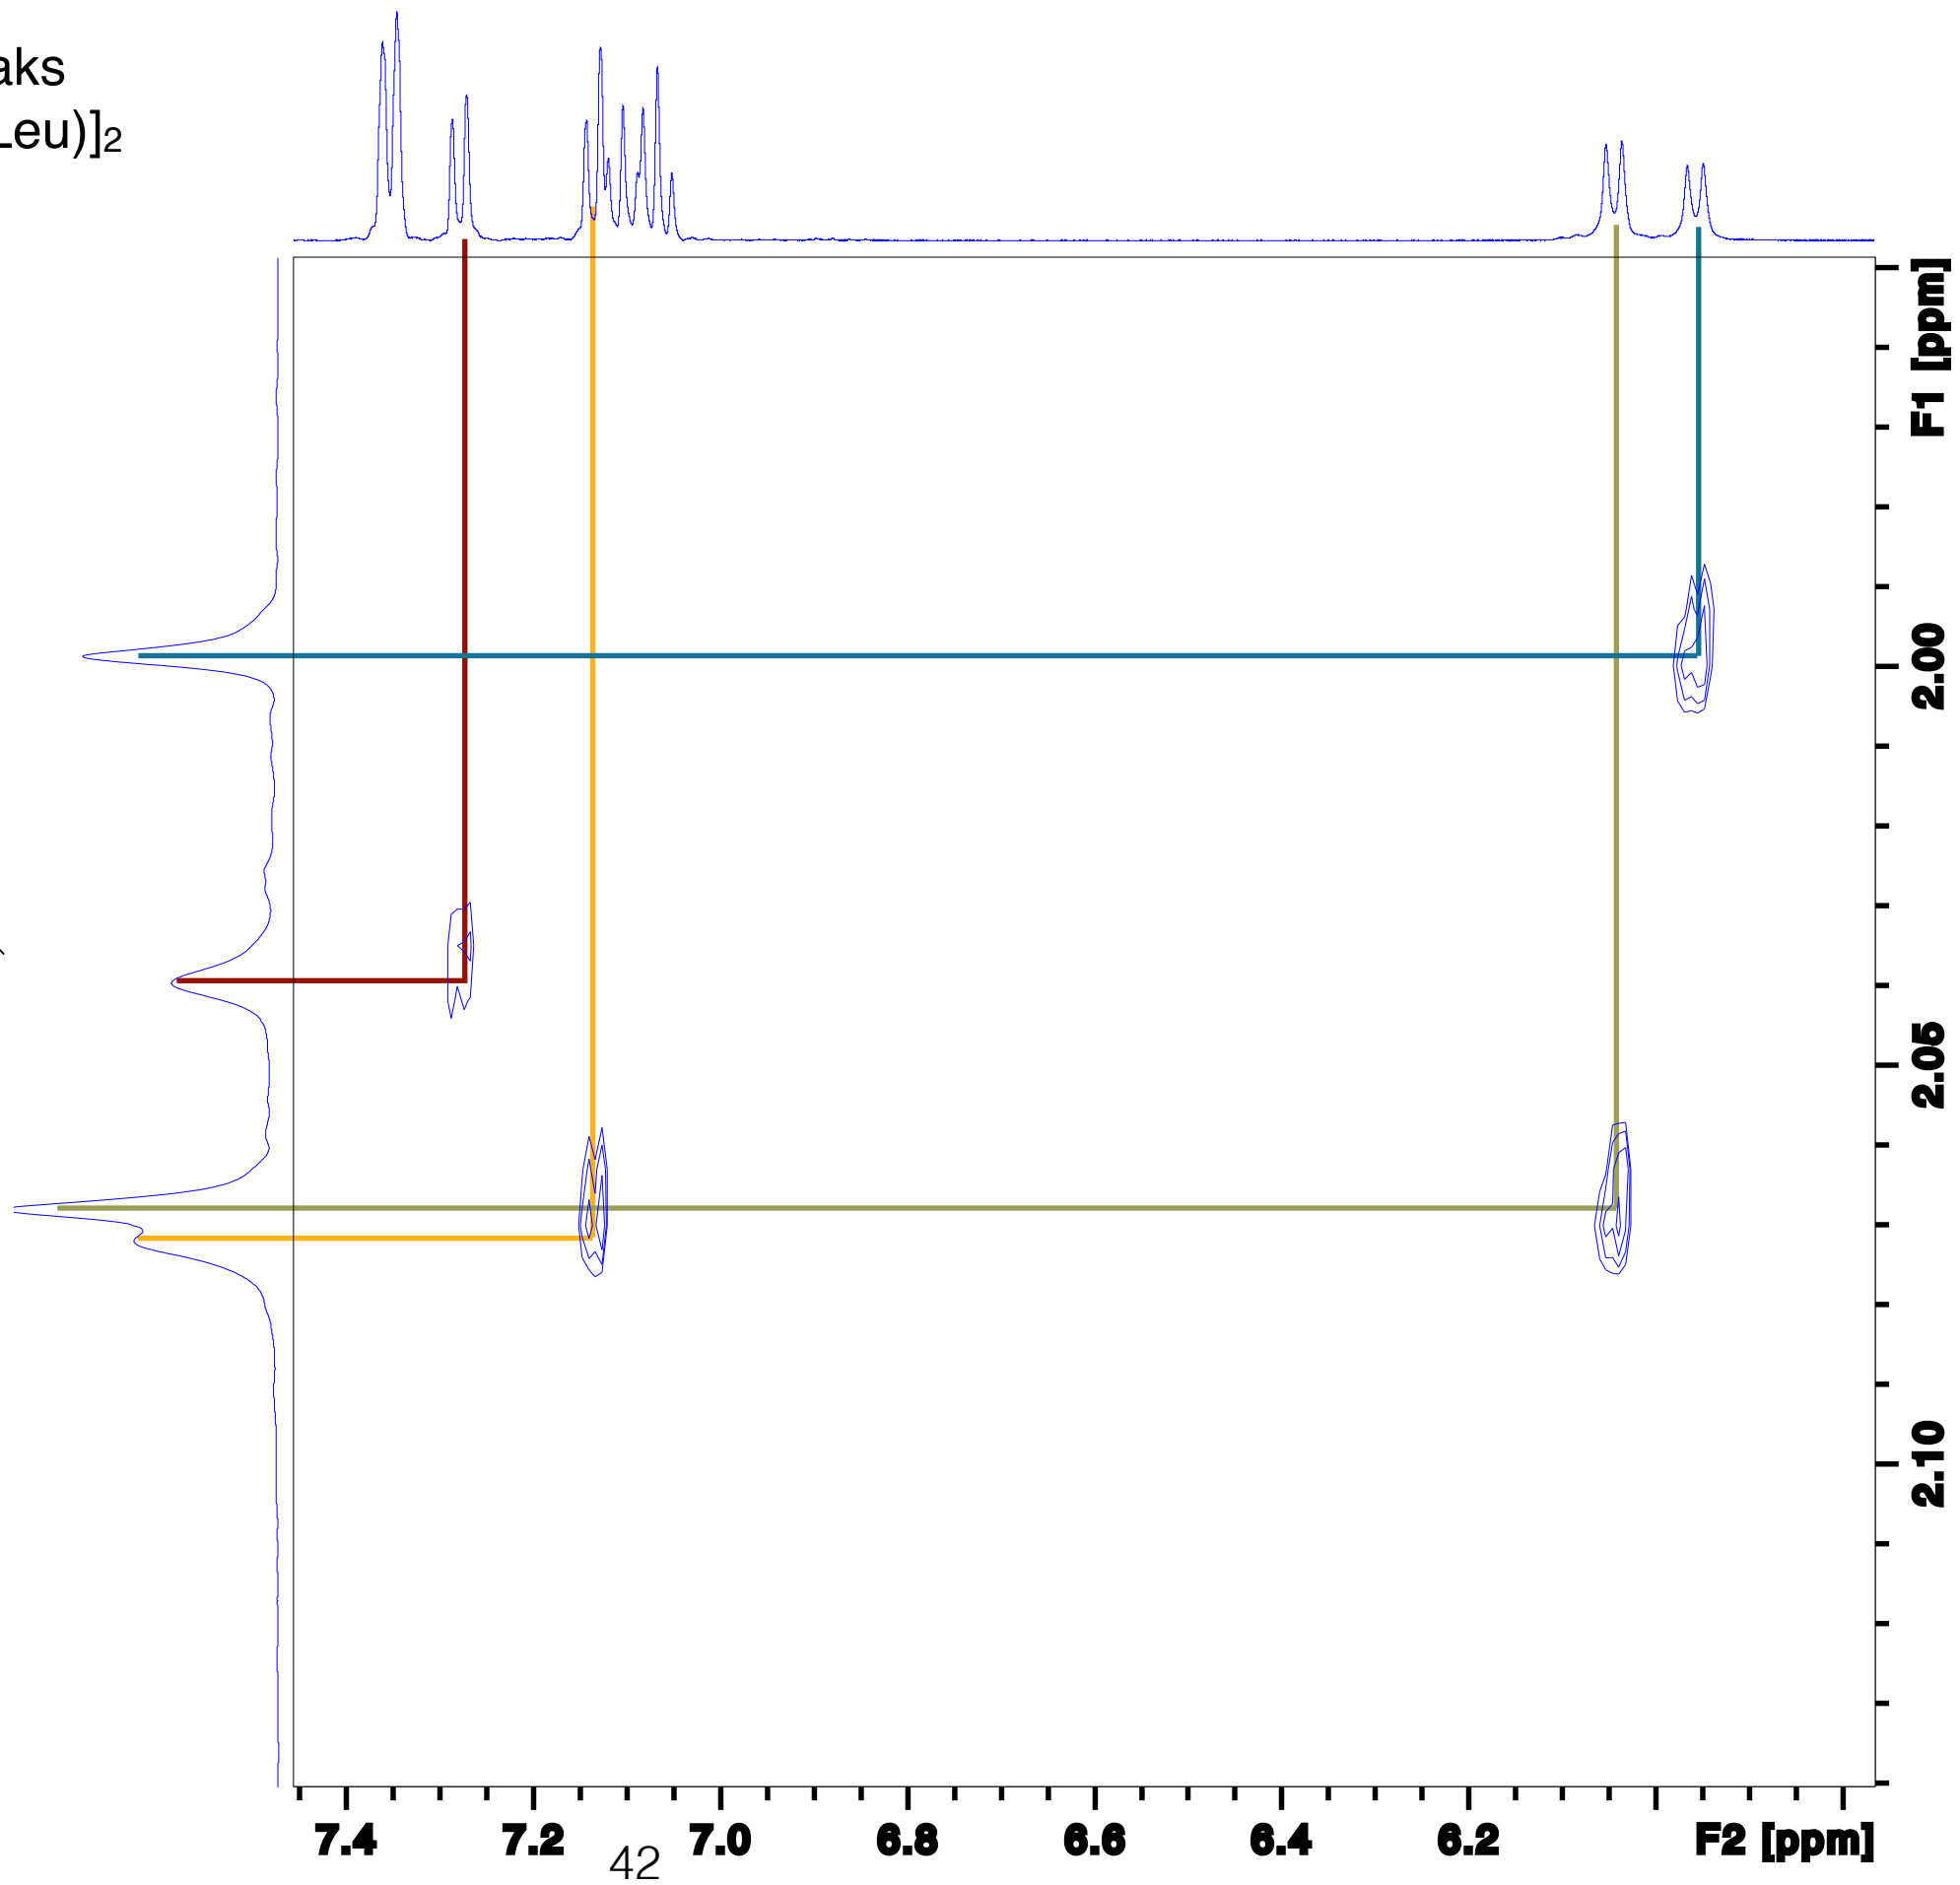

weak NOE cross peaks  
from MPAA to substrate  
[Pd(CF<sub>3</sub>-dmba)(NAc-Leu)]<sub>2</sub>

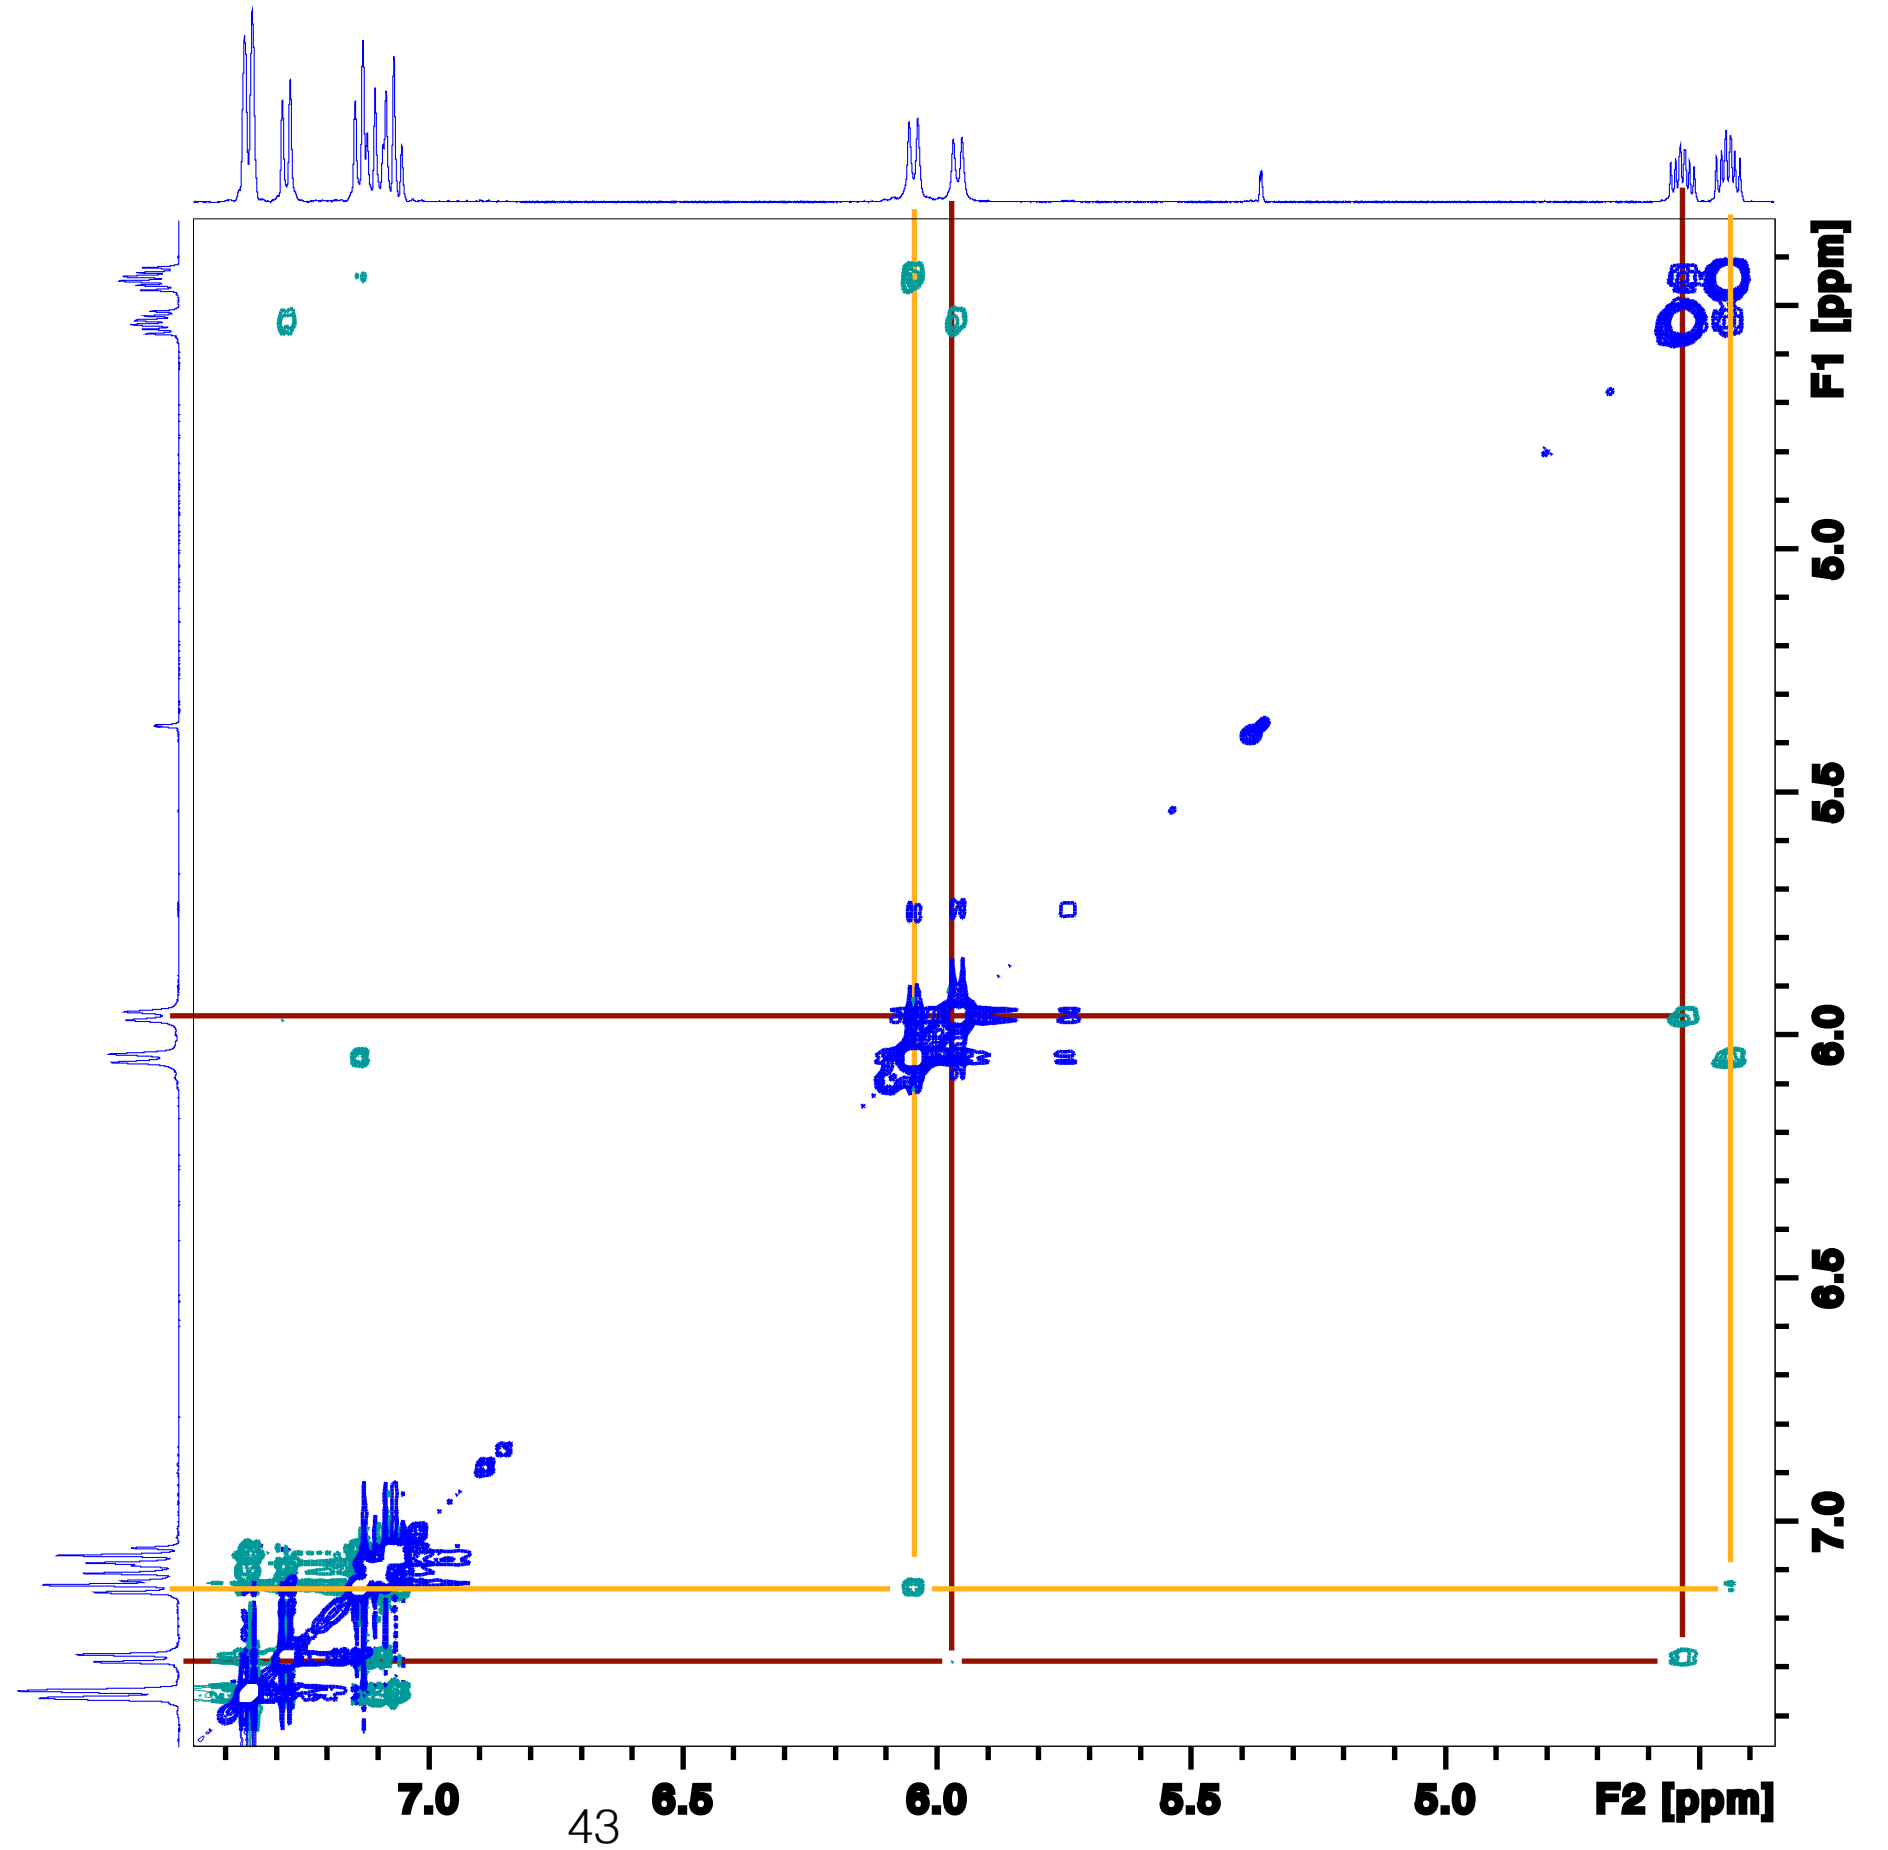

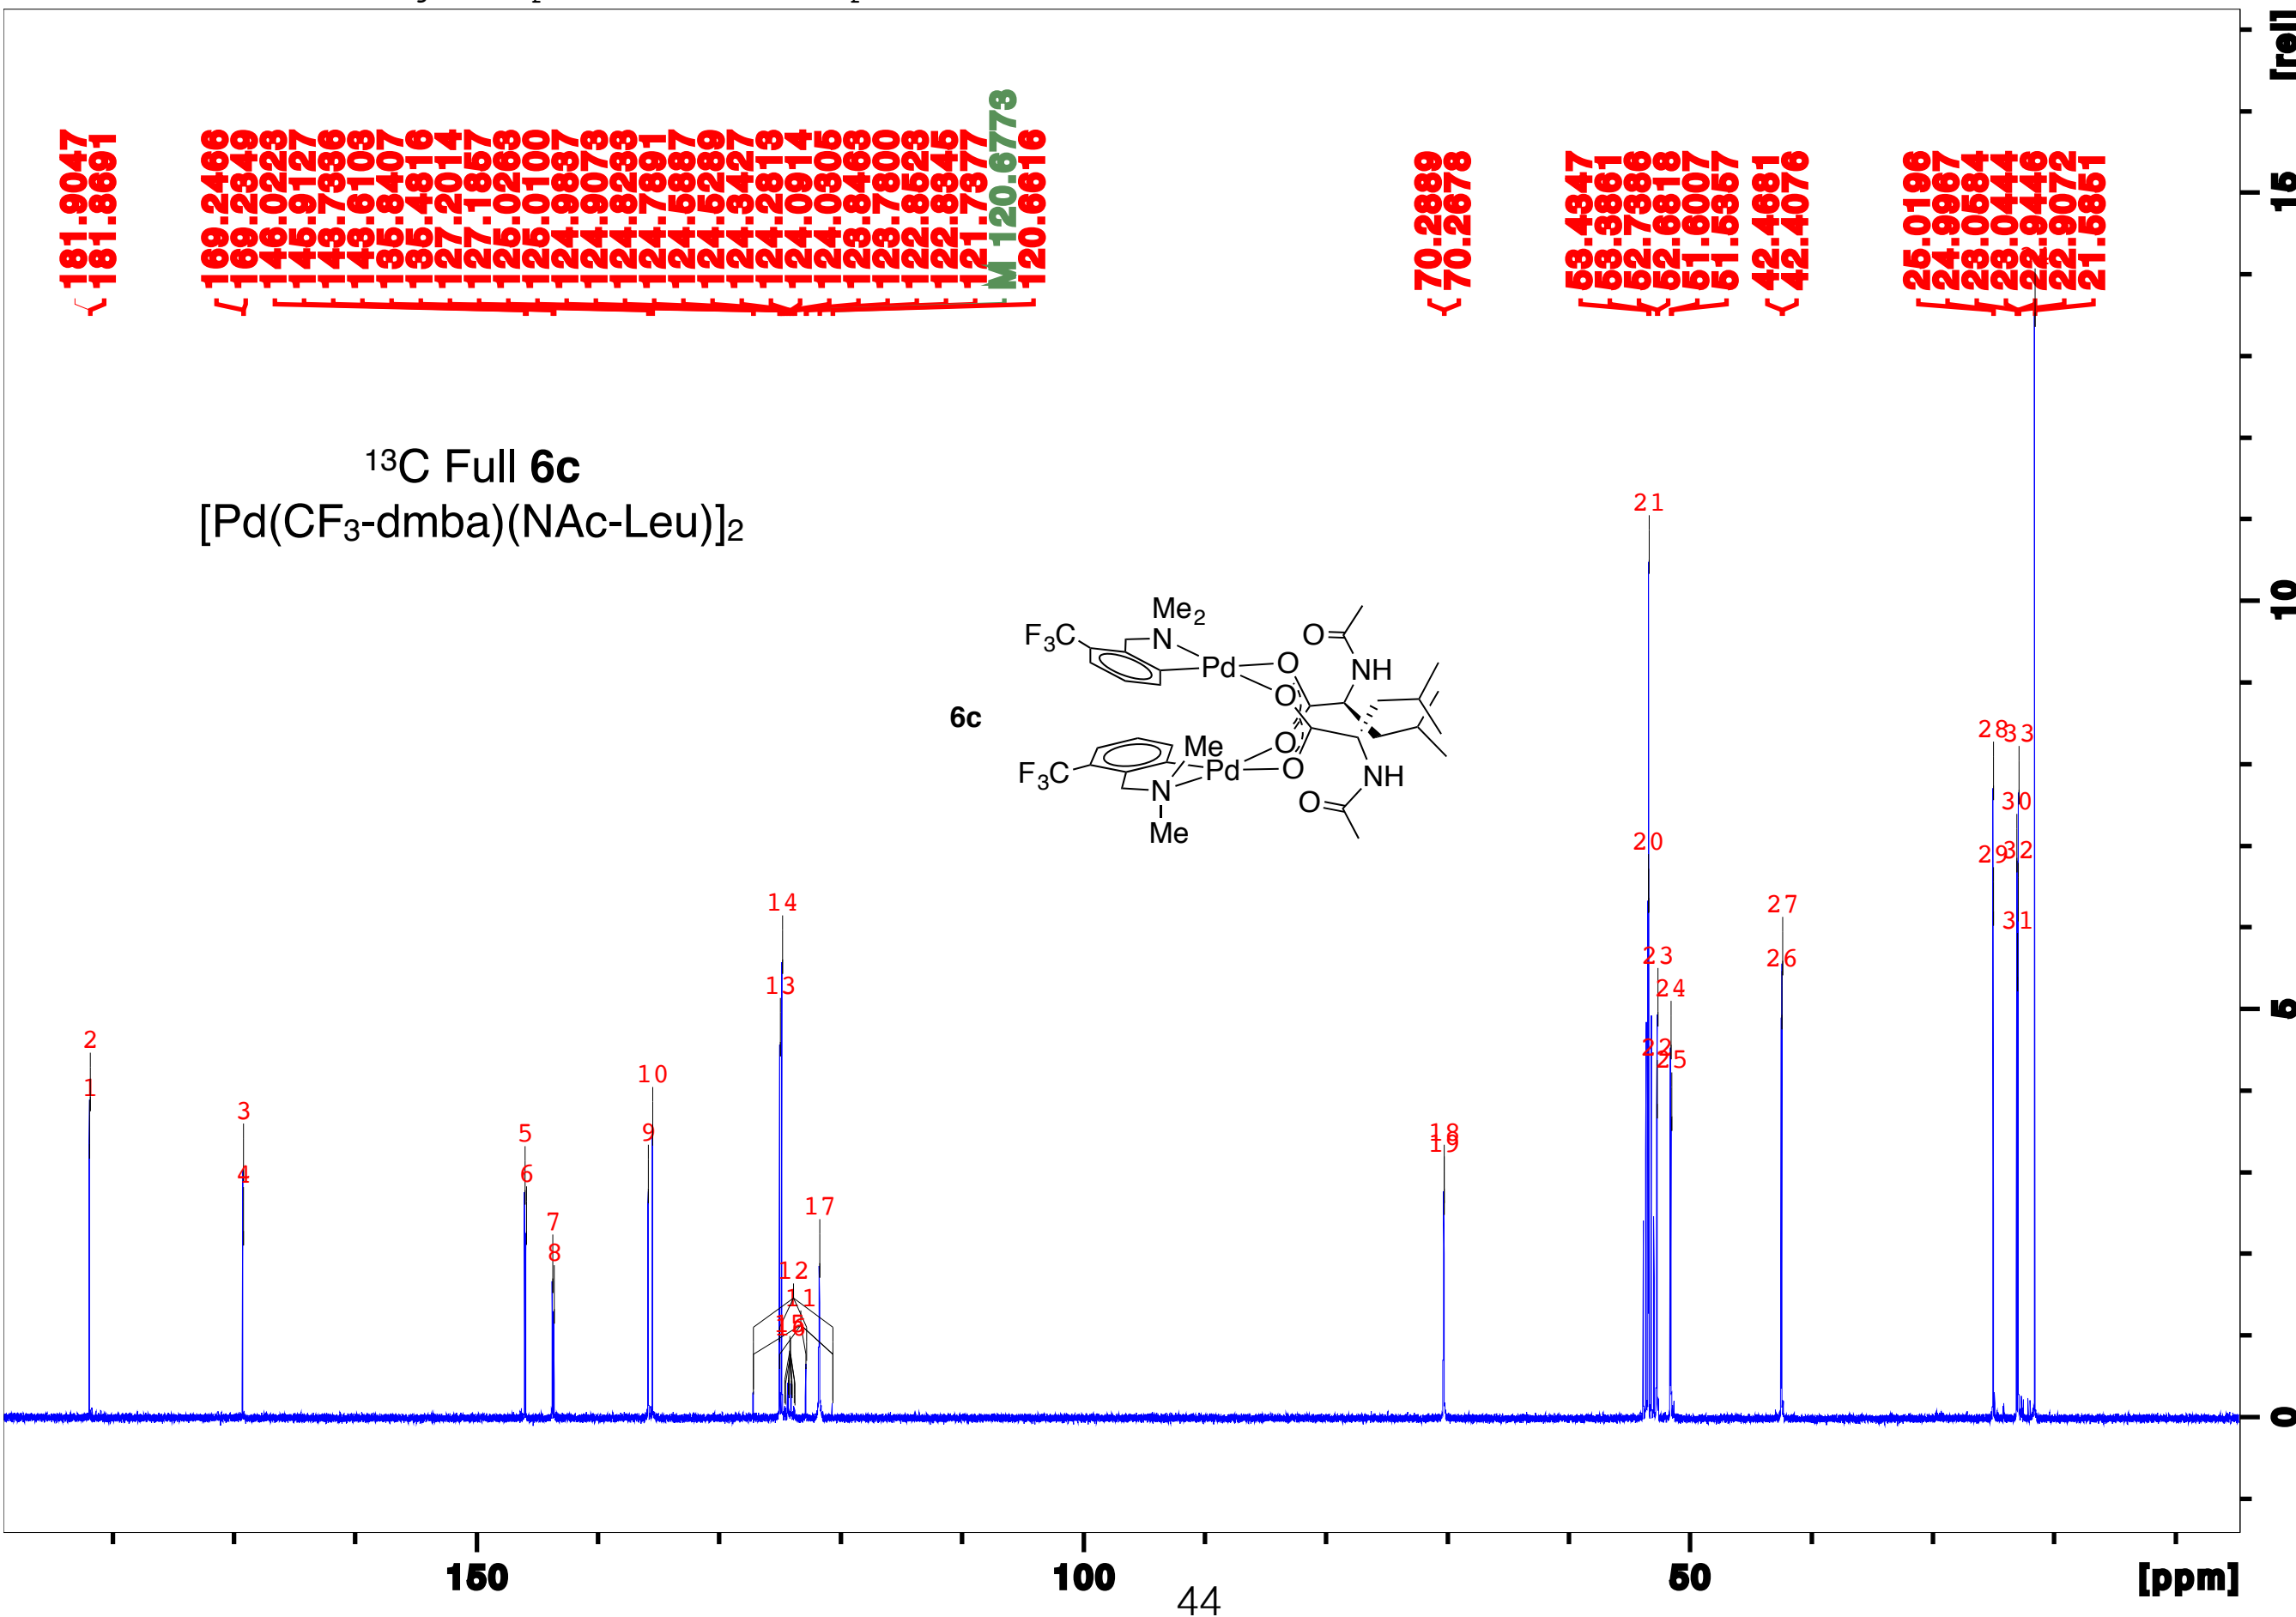



<sup>13</sup>C + 135DEPT  
[Pd(CF<sub>3</sub>-dmba)(NAc-Leu)]<sub>2</sub>

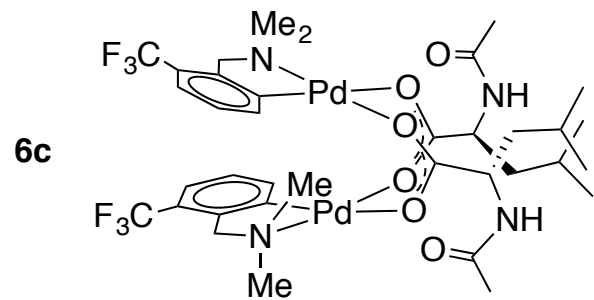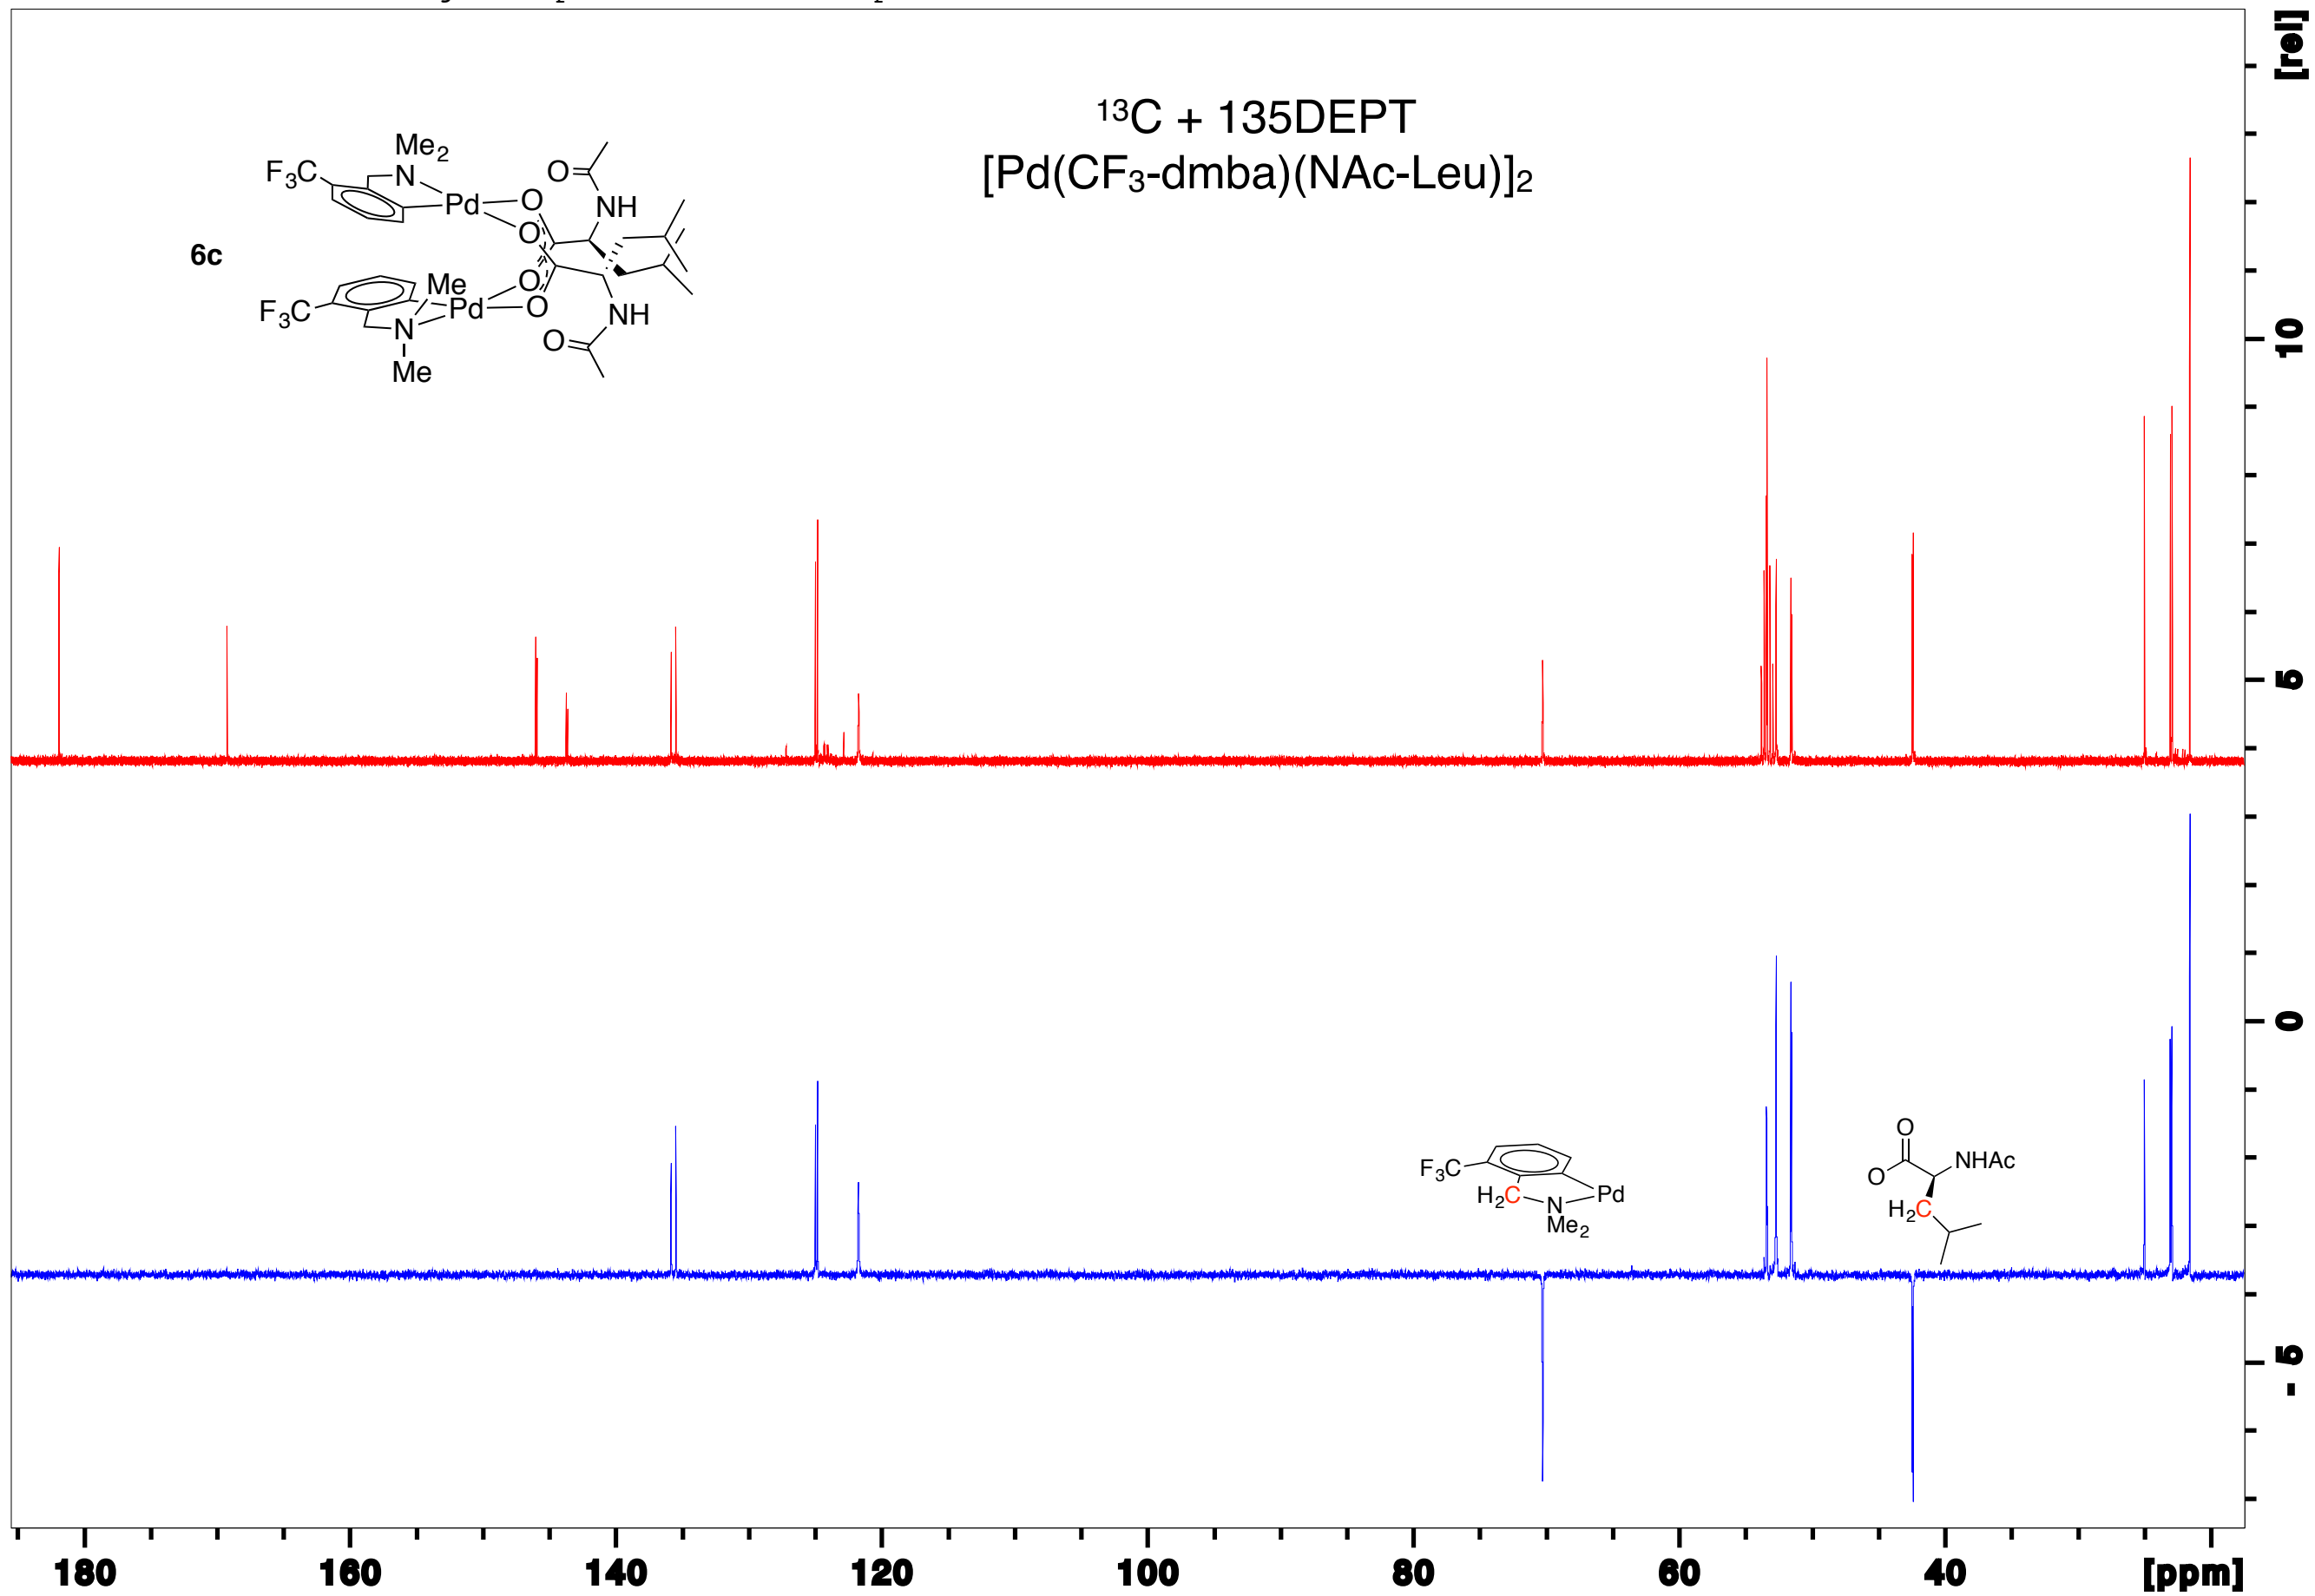

# HMQC

[Pd(CF<sub>3</sub>-dmba)(NAc-Leu)]<sub>2</sub>

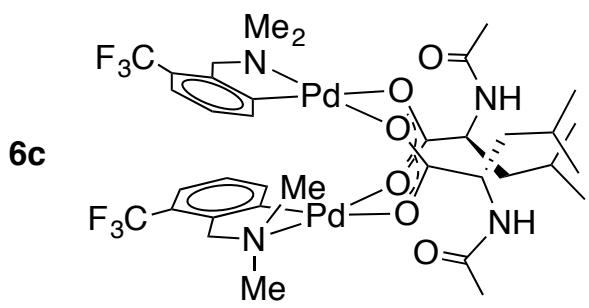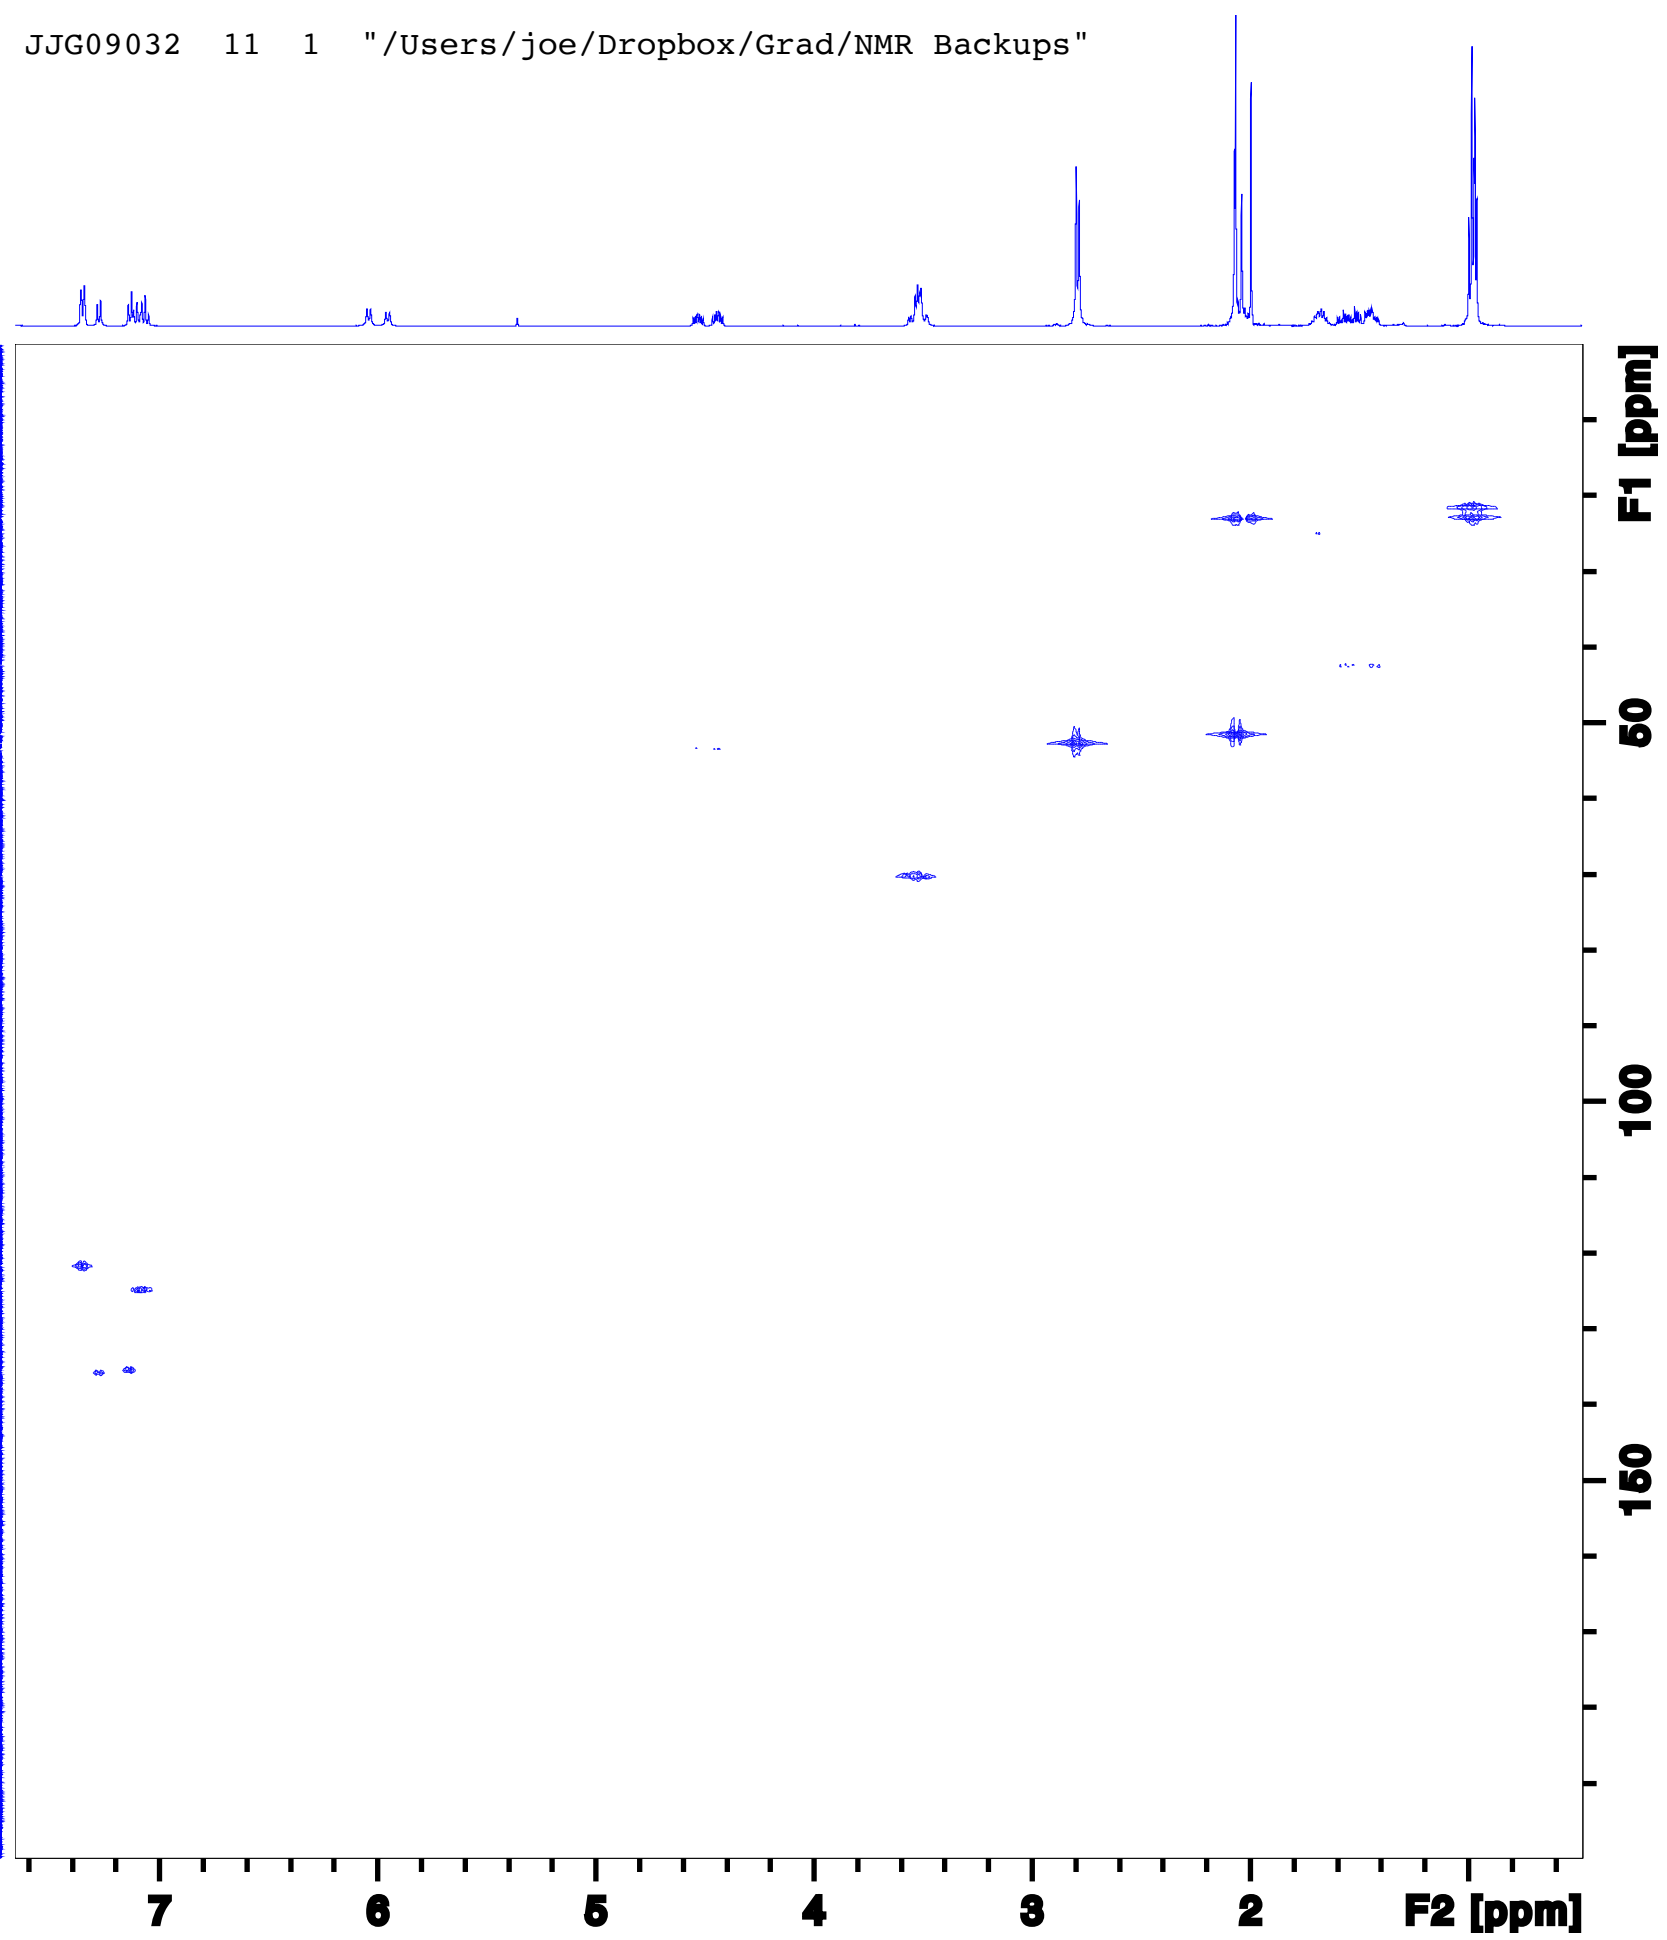

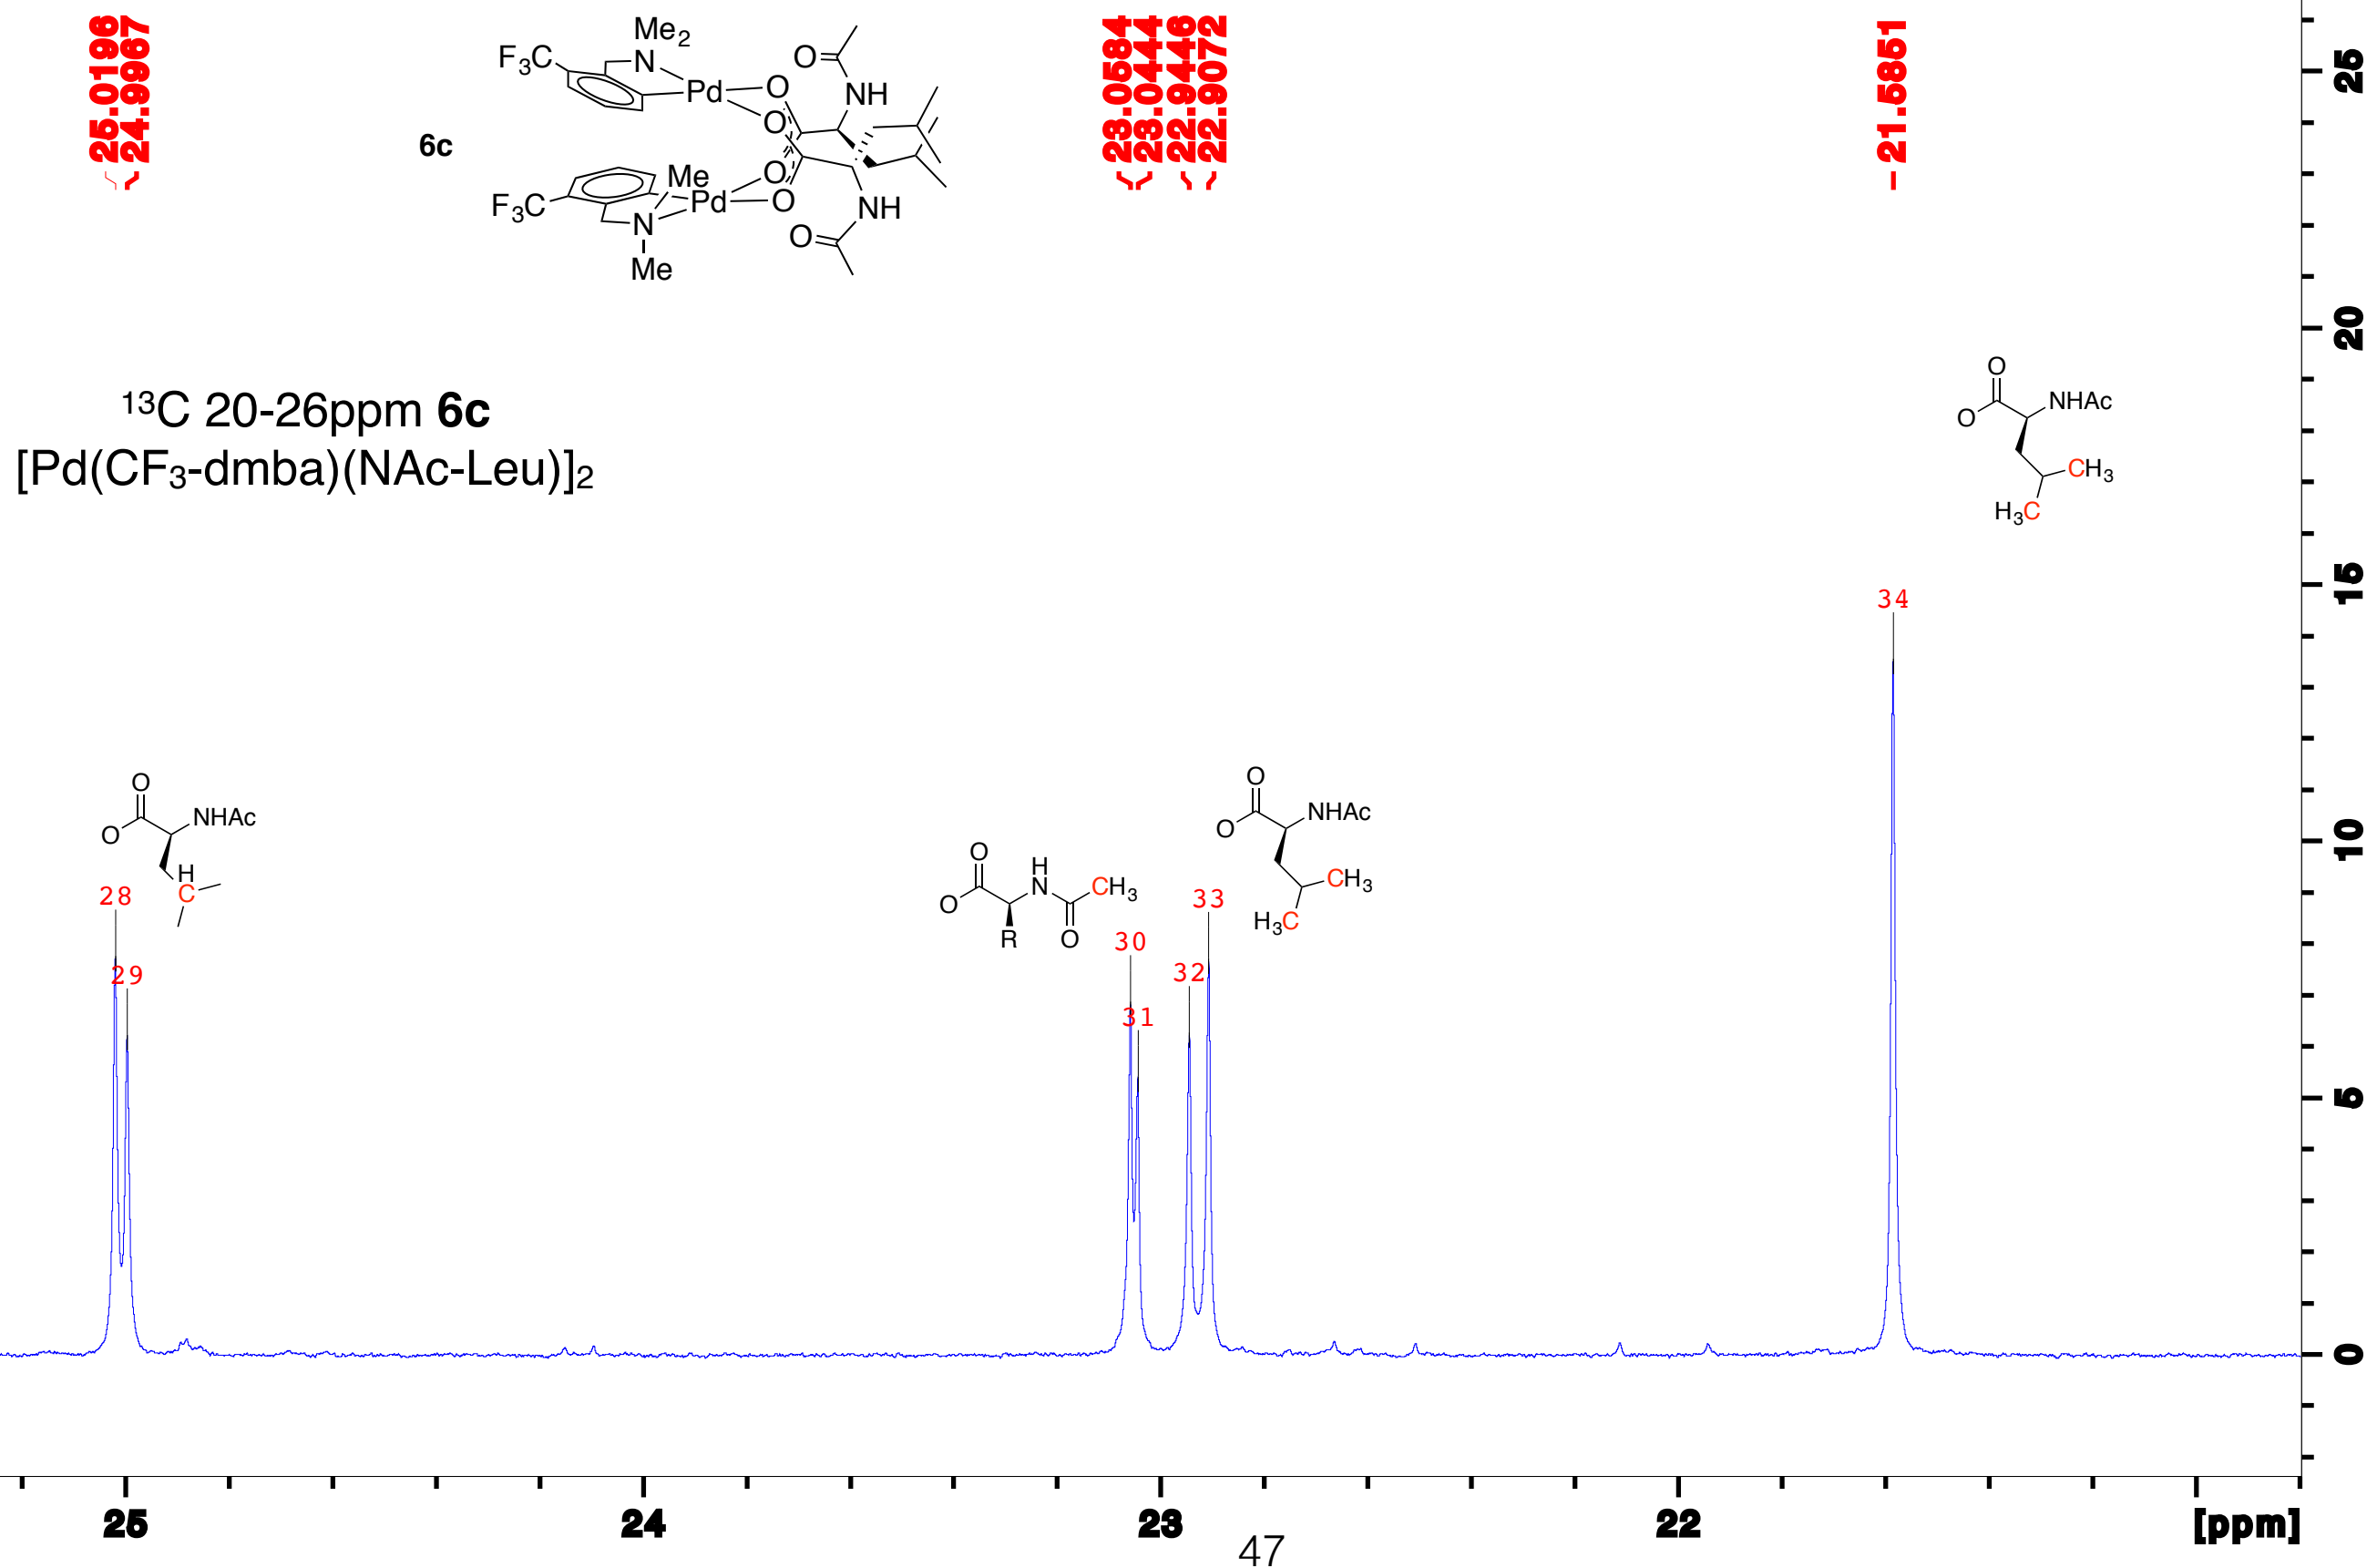

$^{13}\text{C}$  43-56ppm **6c**  
[Pd(CF<sub>3</sub>-dmba)(NAC-Leu)]<sub>2</sub>

JJG09032 8 1 "/Users/joe/Dropbox/Grad/NMR Backups"

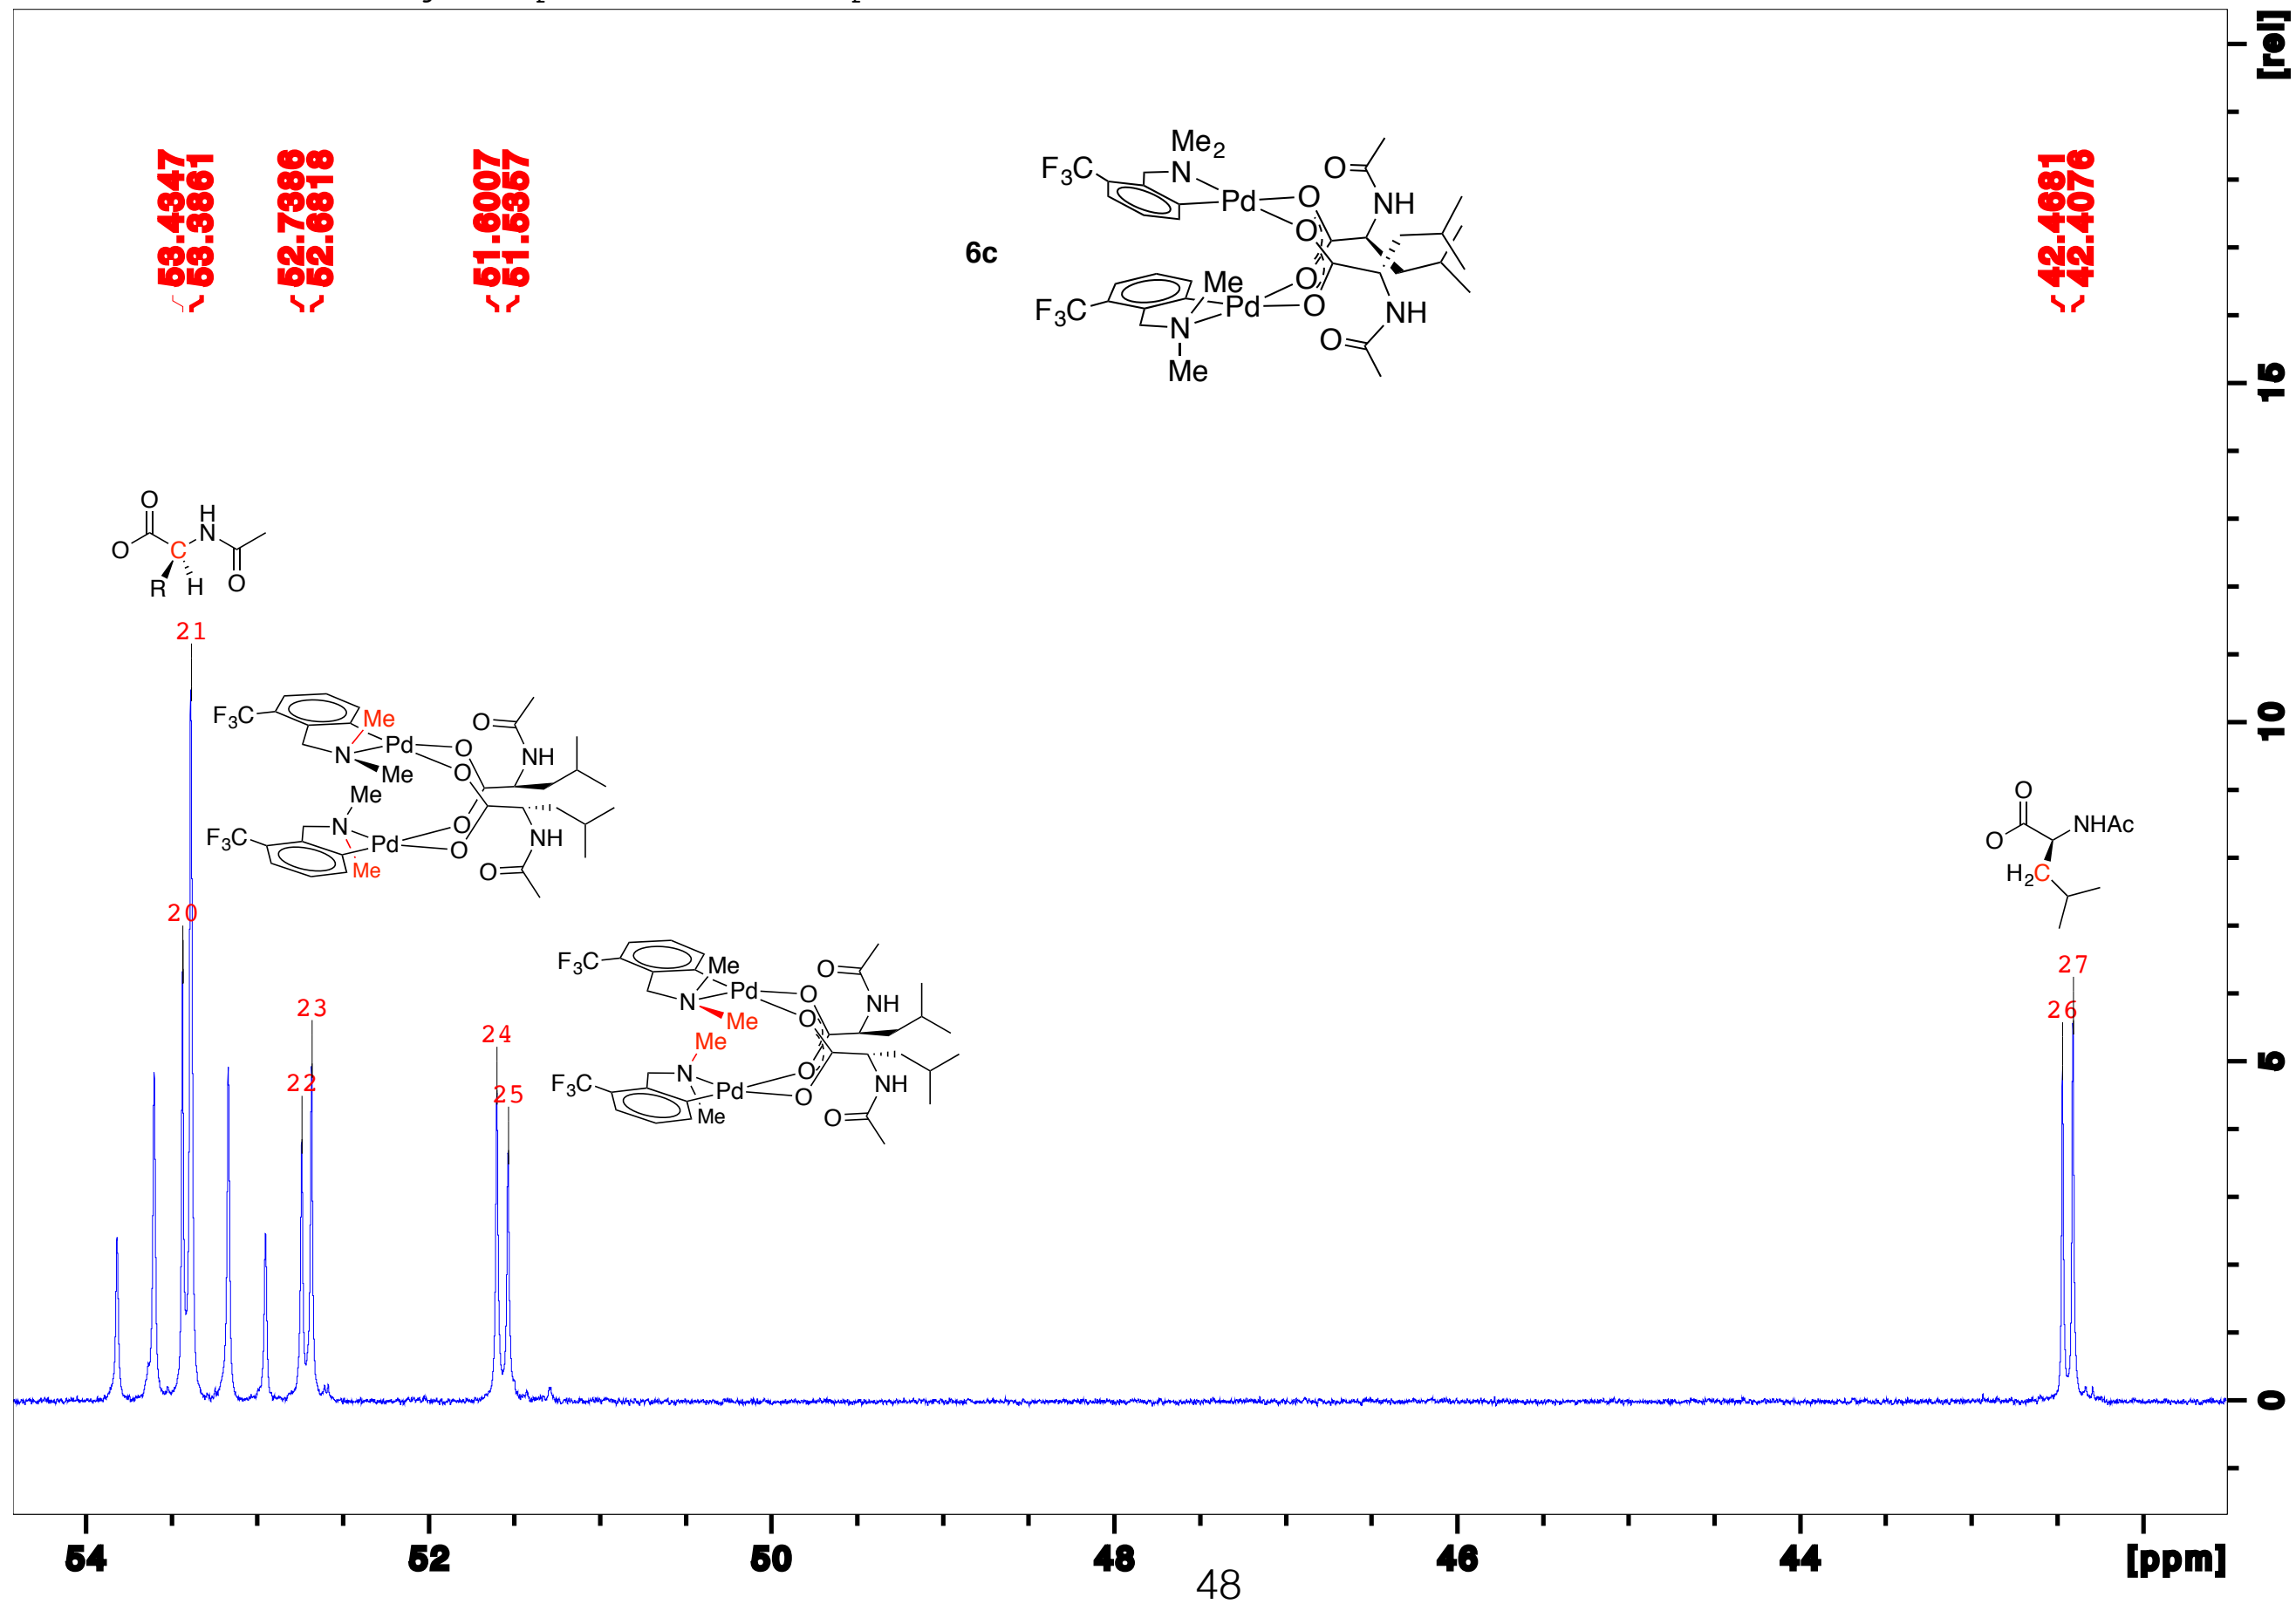

# HMQC aliphatic region [Pd(CF<sub>3</sub>-dmba)(NAC-Leu)]<sub>2</sub>

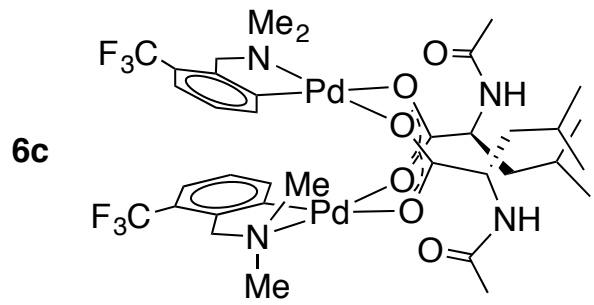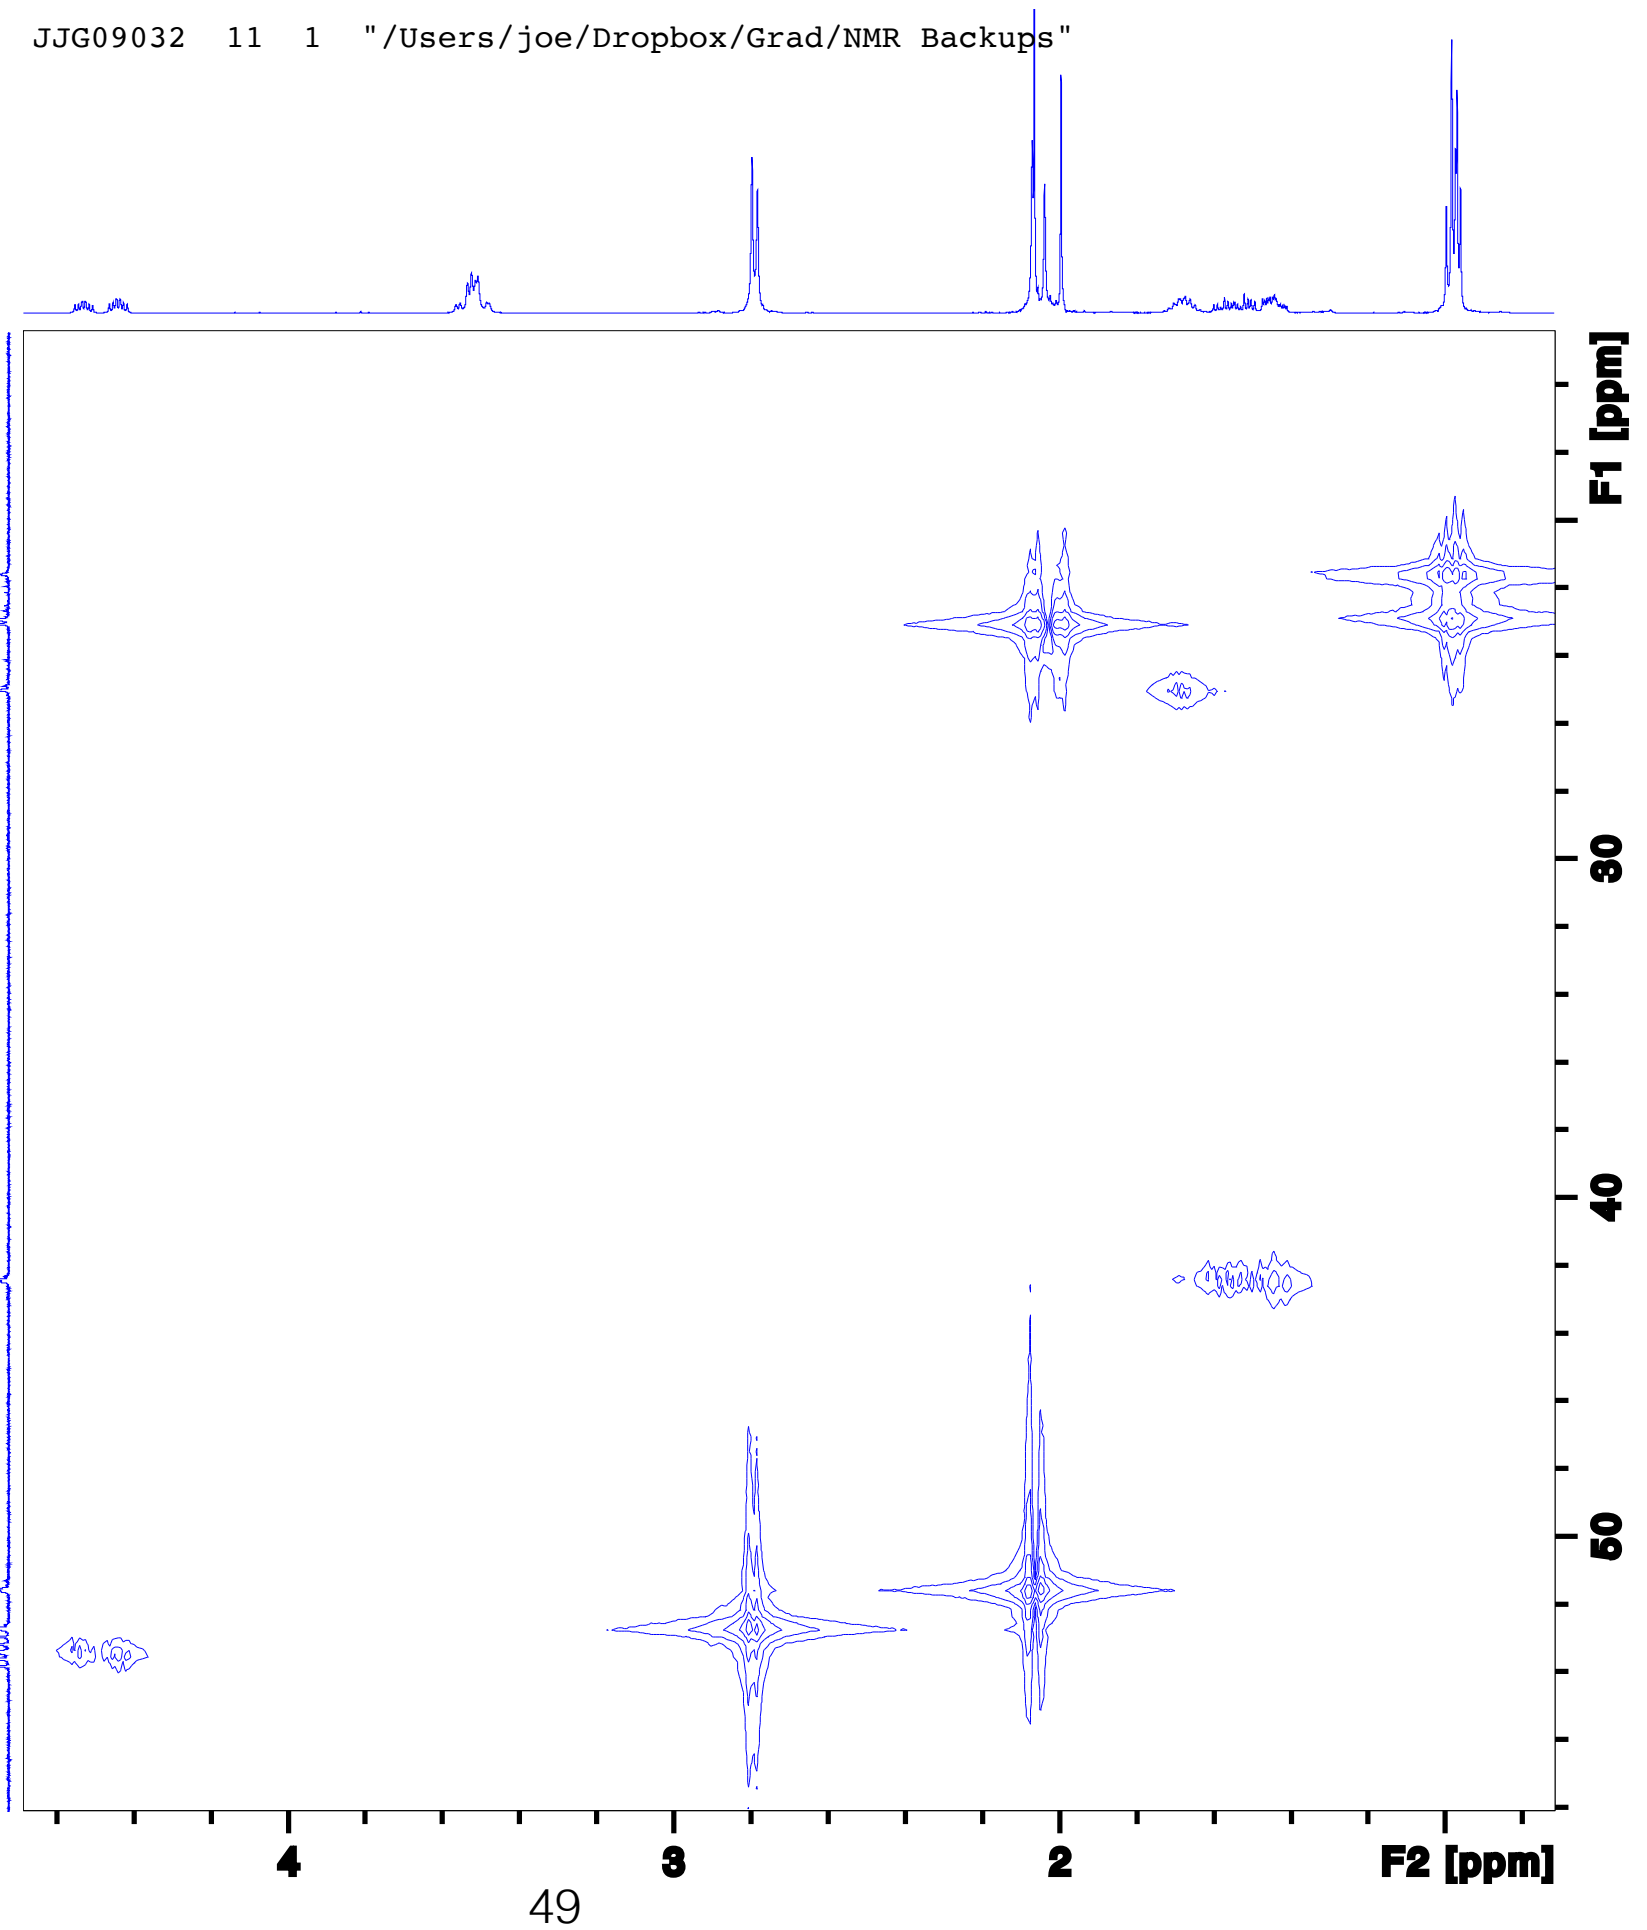

<sup>13</sup>C aromatic region **6c**  
[Pd(CF<sub>3</sub>-dmba)(NAc-Leu)]<sub>2</sub>

JJG09032 8 1 "/Users/joe/Dropbox/Grad/NMR Backups"

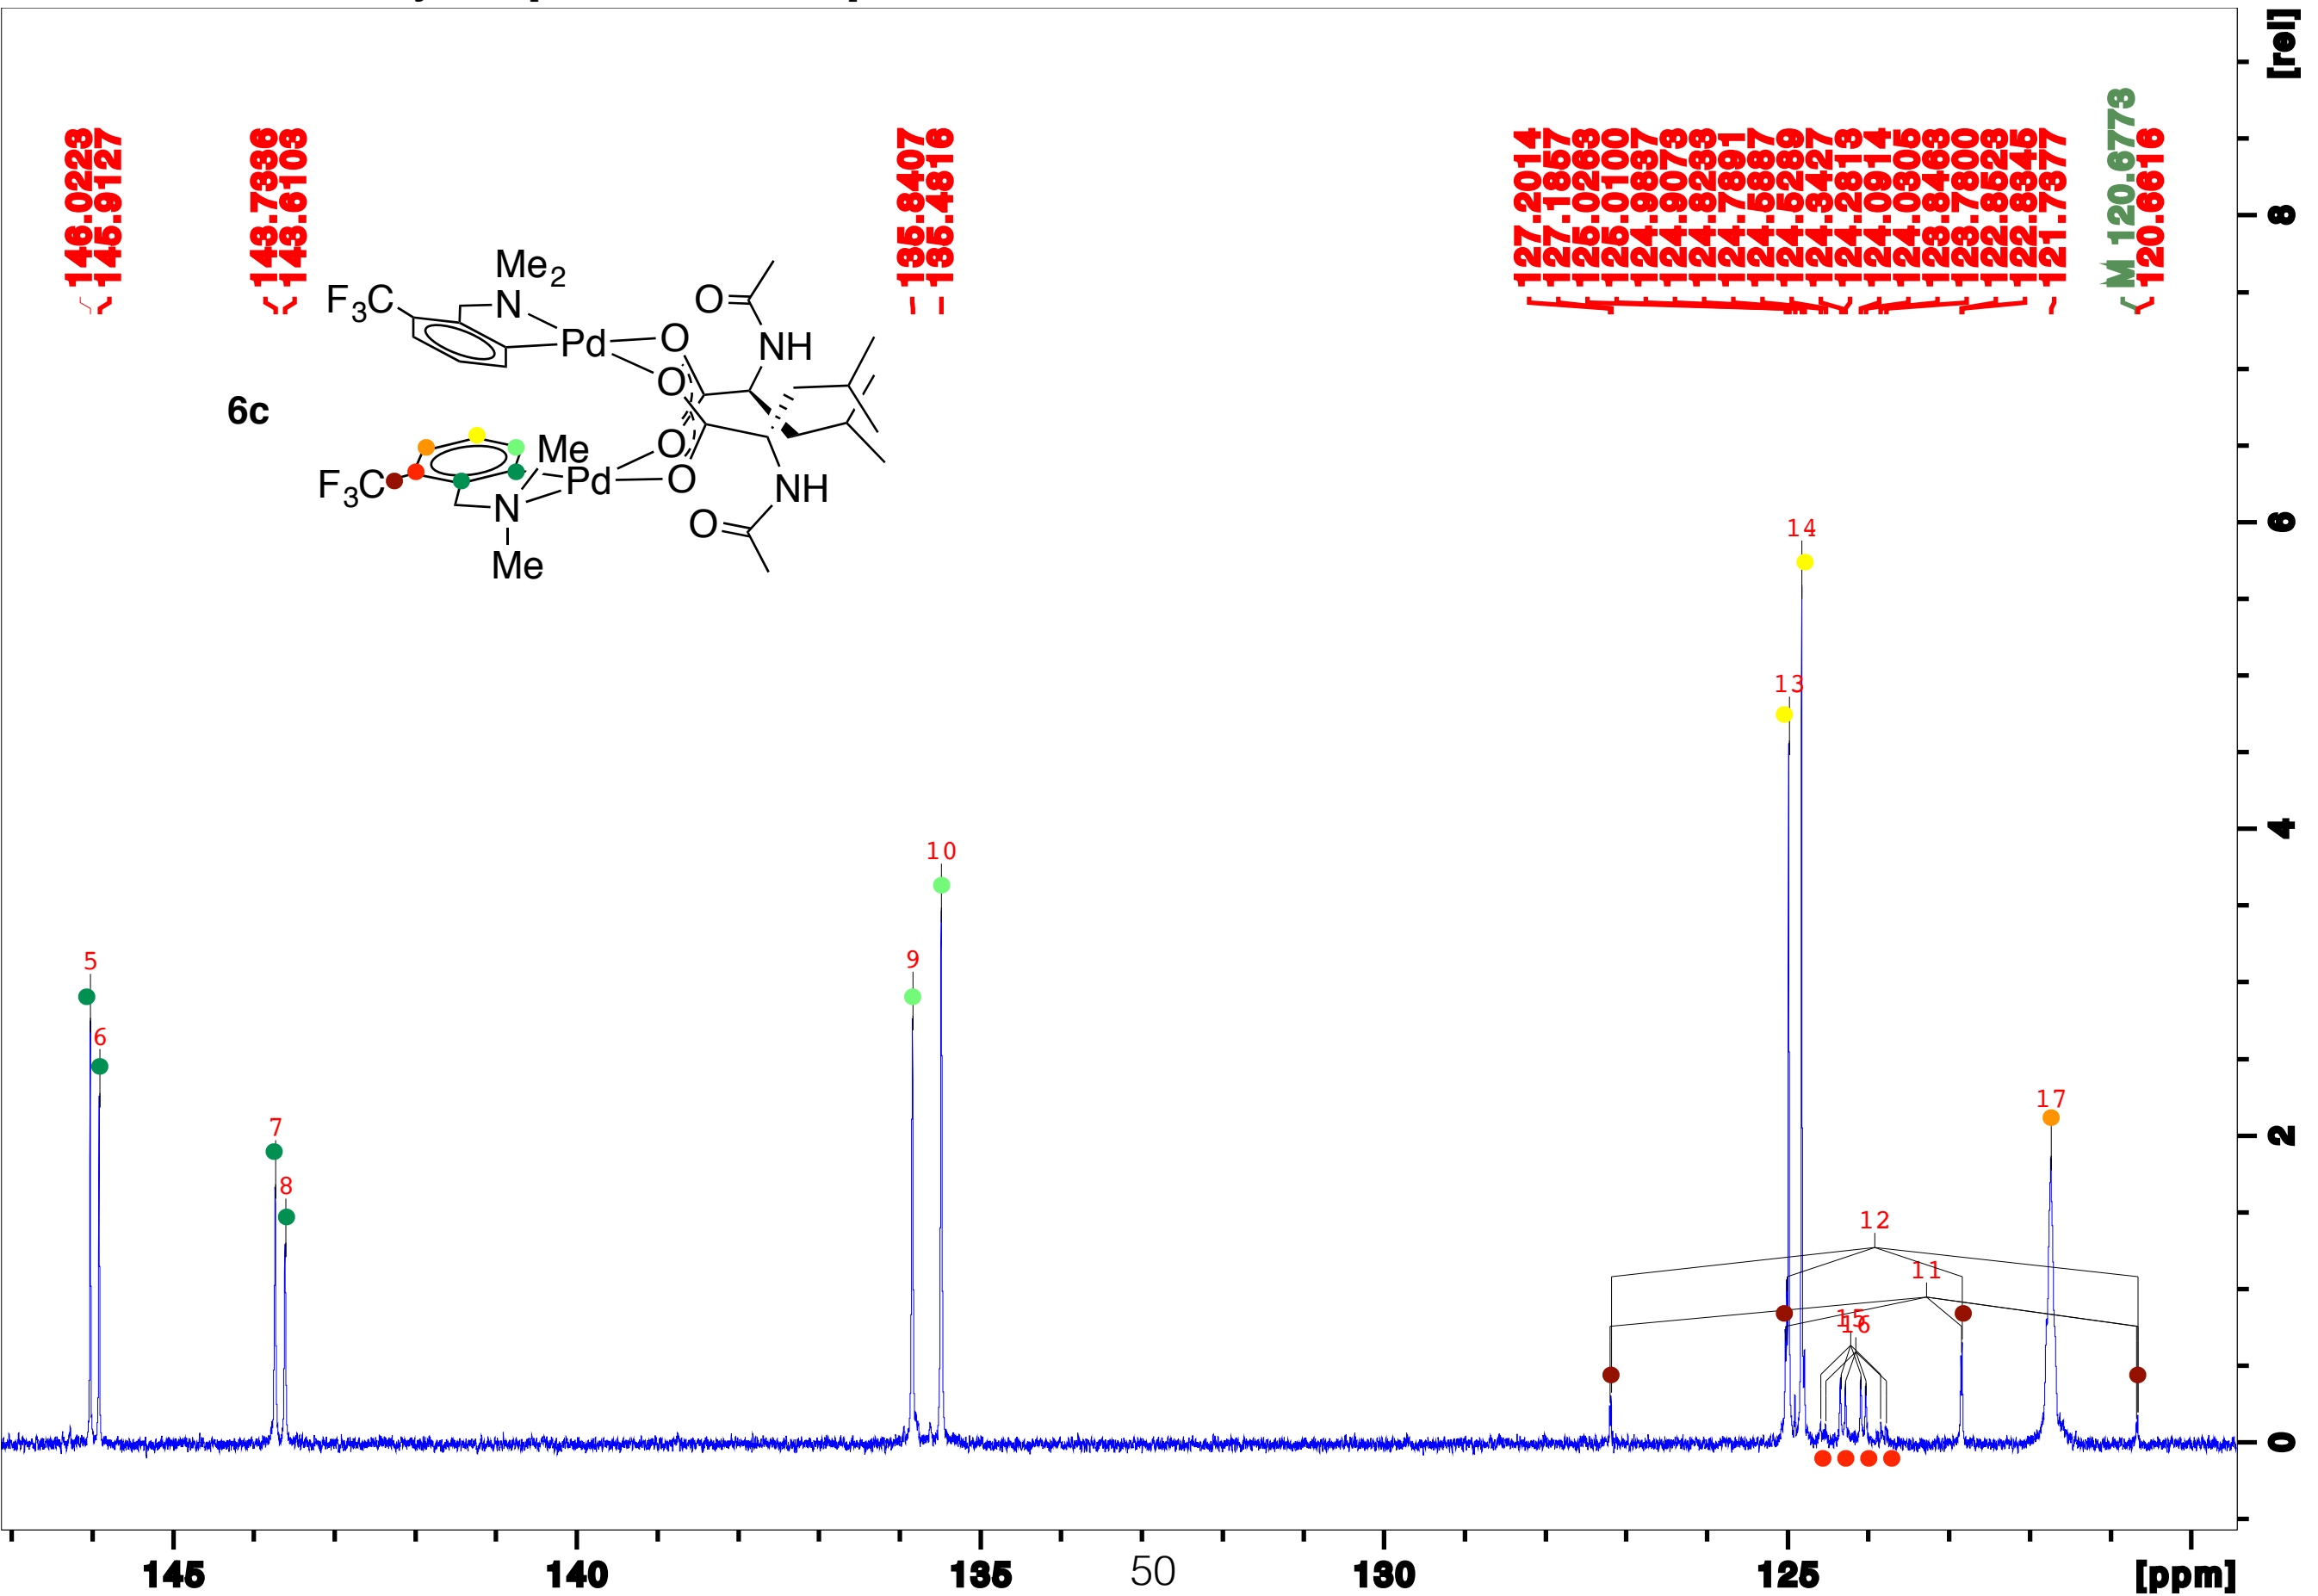

# HMQC aromatic region [Pd(CF<sub>3</sub>-dmba)(NAC-Leu)]<sub>2</sub>

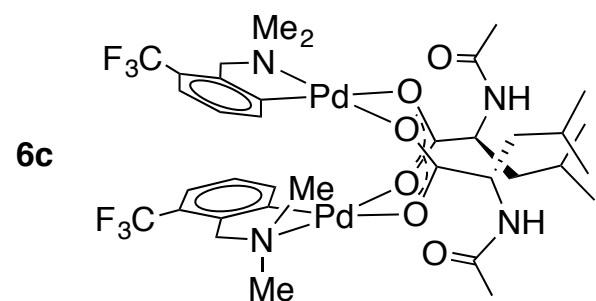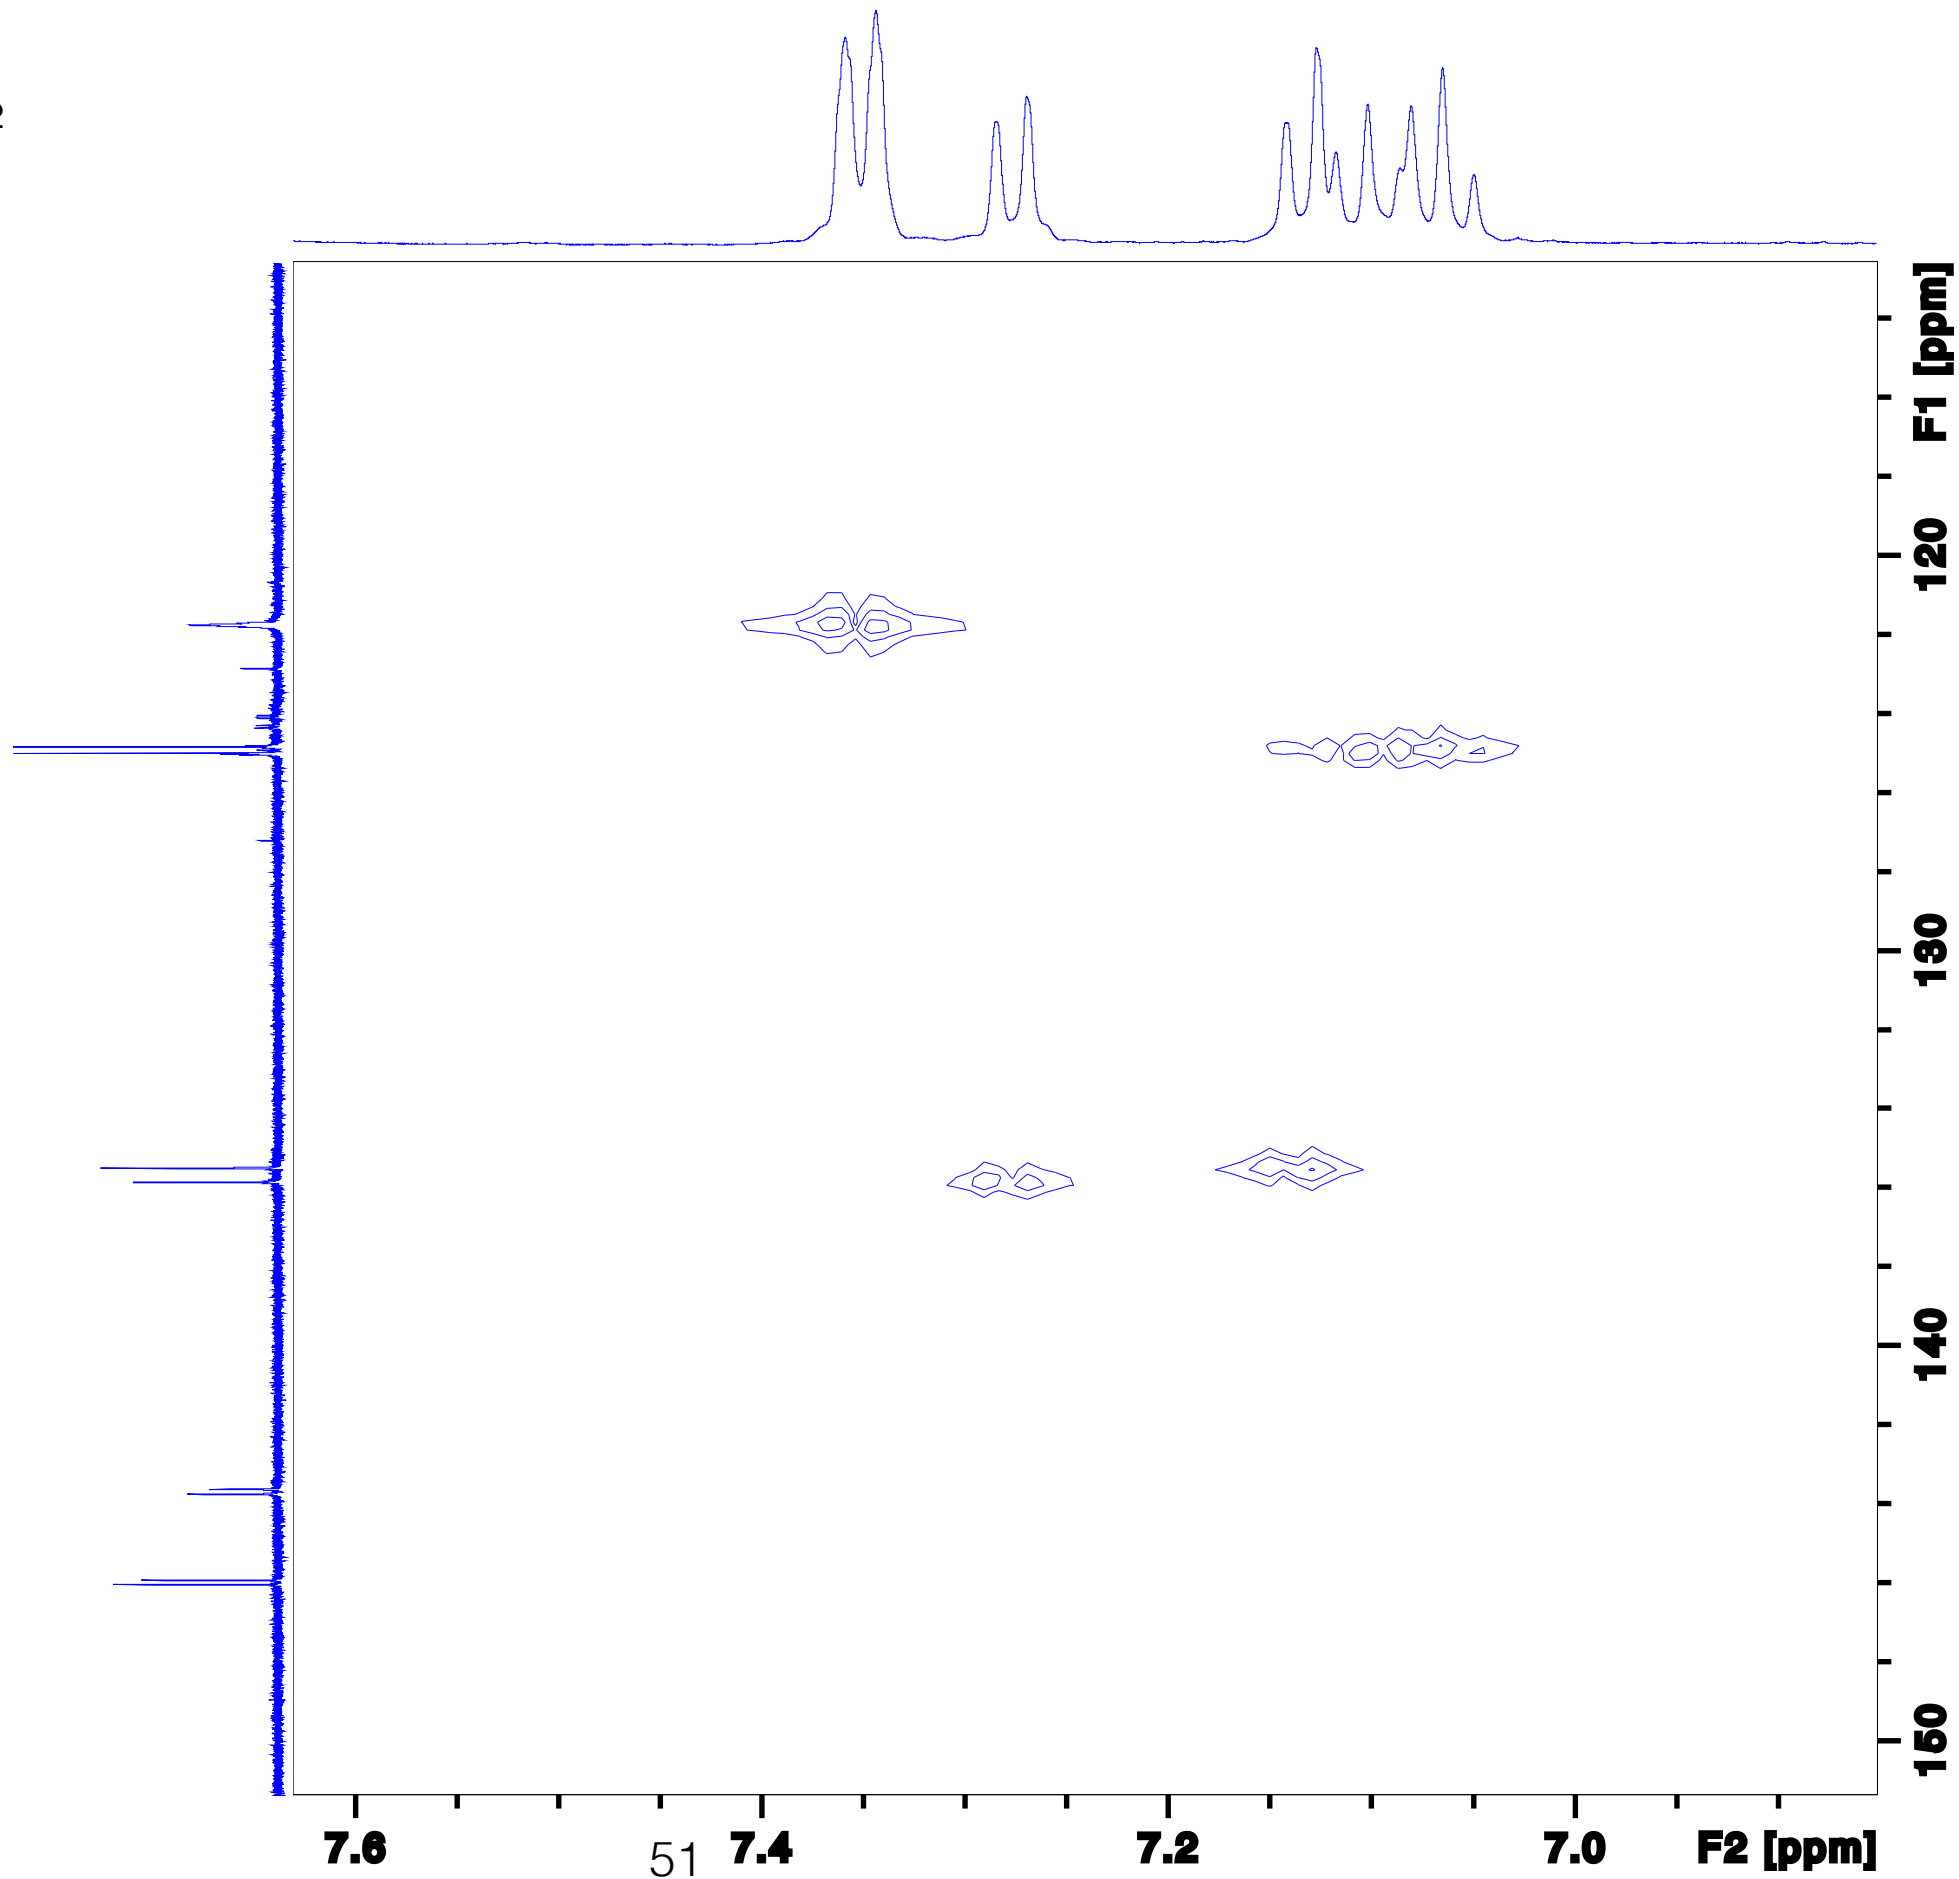

# HMQC

C-H's ortho to Pd

[Pd(CF<sub>3</sub>-dmba)(NAc-Leu)]<sub>2</sub>

JJG09032 11 1 "/Users/joe/Dropbox/Grad/NMR Backups"

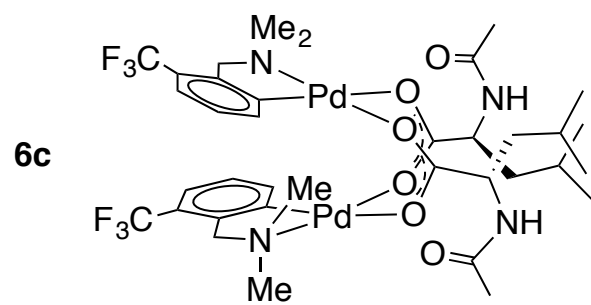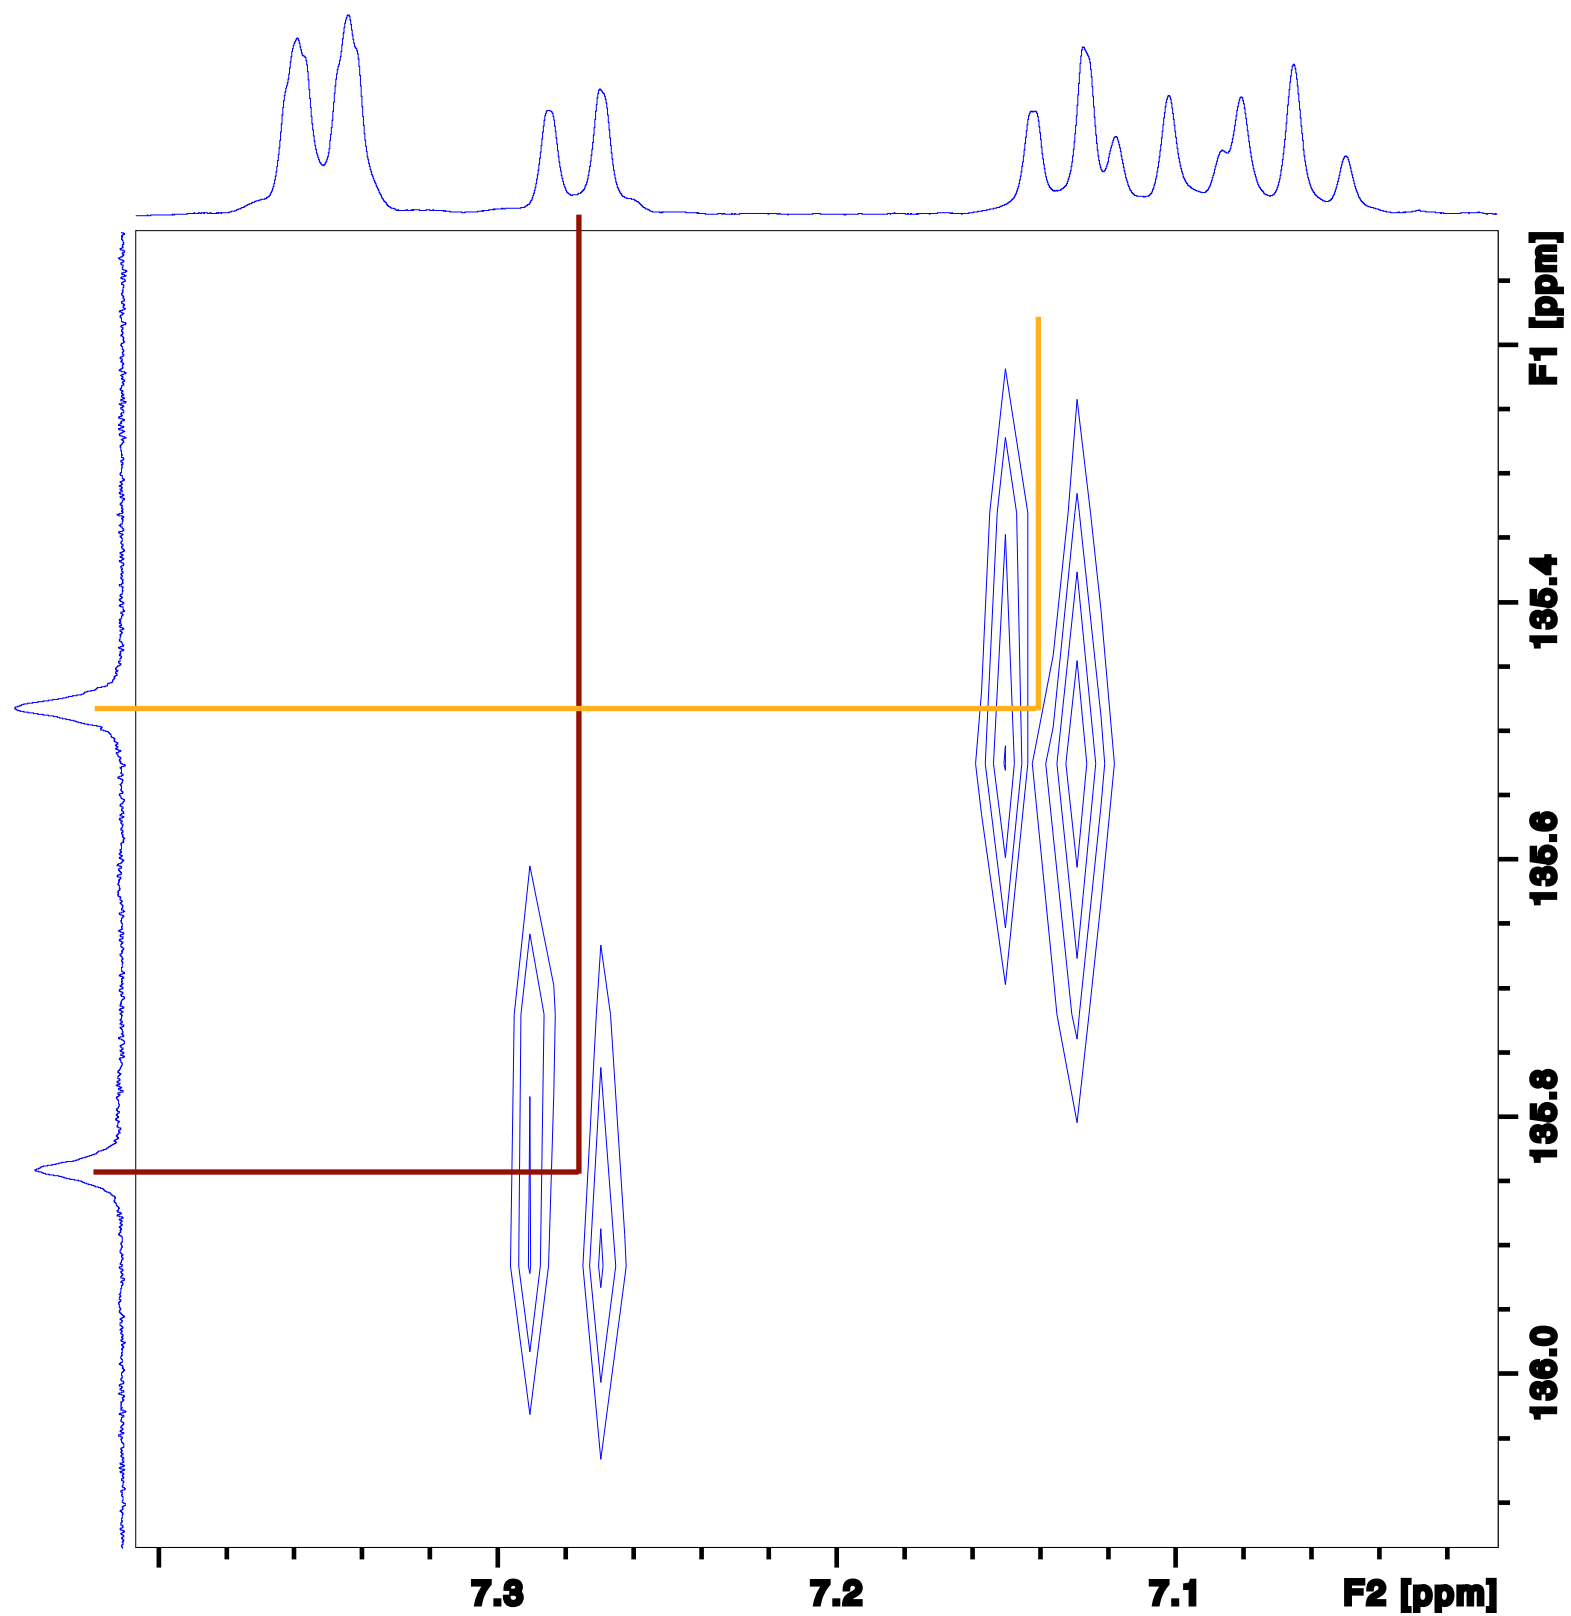



<sup>19</sup>F Full **6c**  
[Pd(CF<sub>3</sub>-dmba)(NAc-Leu)]<sub>2</sub>

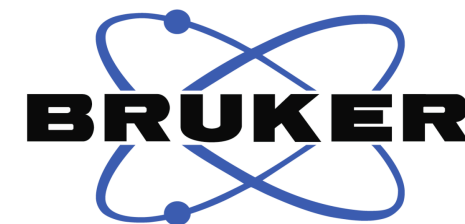

Current Data Parameters  
NAME JJG09031  
EXPNO 10  
PROCNO 1

F2 - Acquisition Parameter  
Date\_ 20161205  
Time 12.28  
INSTRUM spect  
PROBHD 5 mm PABBO BB/  
PULPROG zgflqn  
TD 281244  
SOLVENT CD2Cl2  
NS 1  
DS 0  
SWH 46875.000 Hz  
FIDRES 0.166670 Hz  
AQ 2.9999361 sec  
RG 554.84  
DW 10.667 usec  
DE 6.50 usec  
TE 296.9 K  
D1 13.00000000 sec  
TD0 1

==== CHANNEL f1 =====  
SFO1 470.3176307 MHz  
NUC1 19F  
P1 15.00 usec  
PLW1 37.79999924 W

F2 - Processing parameters  
SI 262144  
SF 470.3477328 MHz  
WDW no  
SSB 0  
LB 0 Hz  
GB 0  
PC 1.00

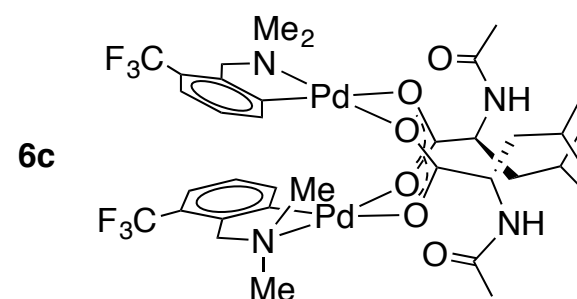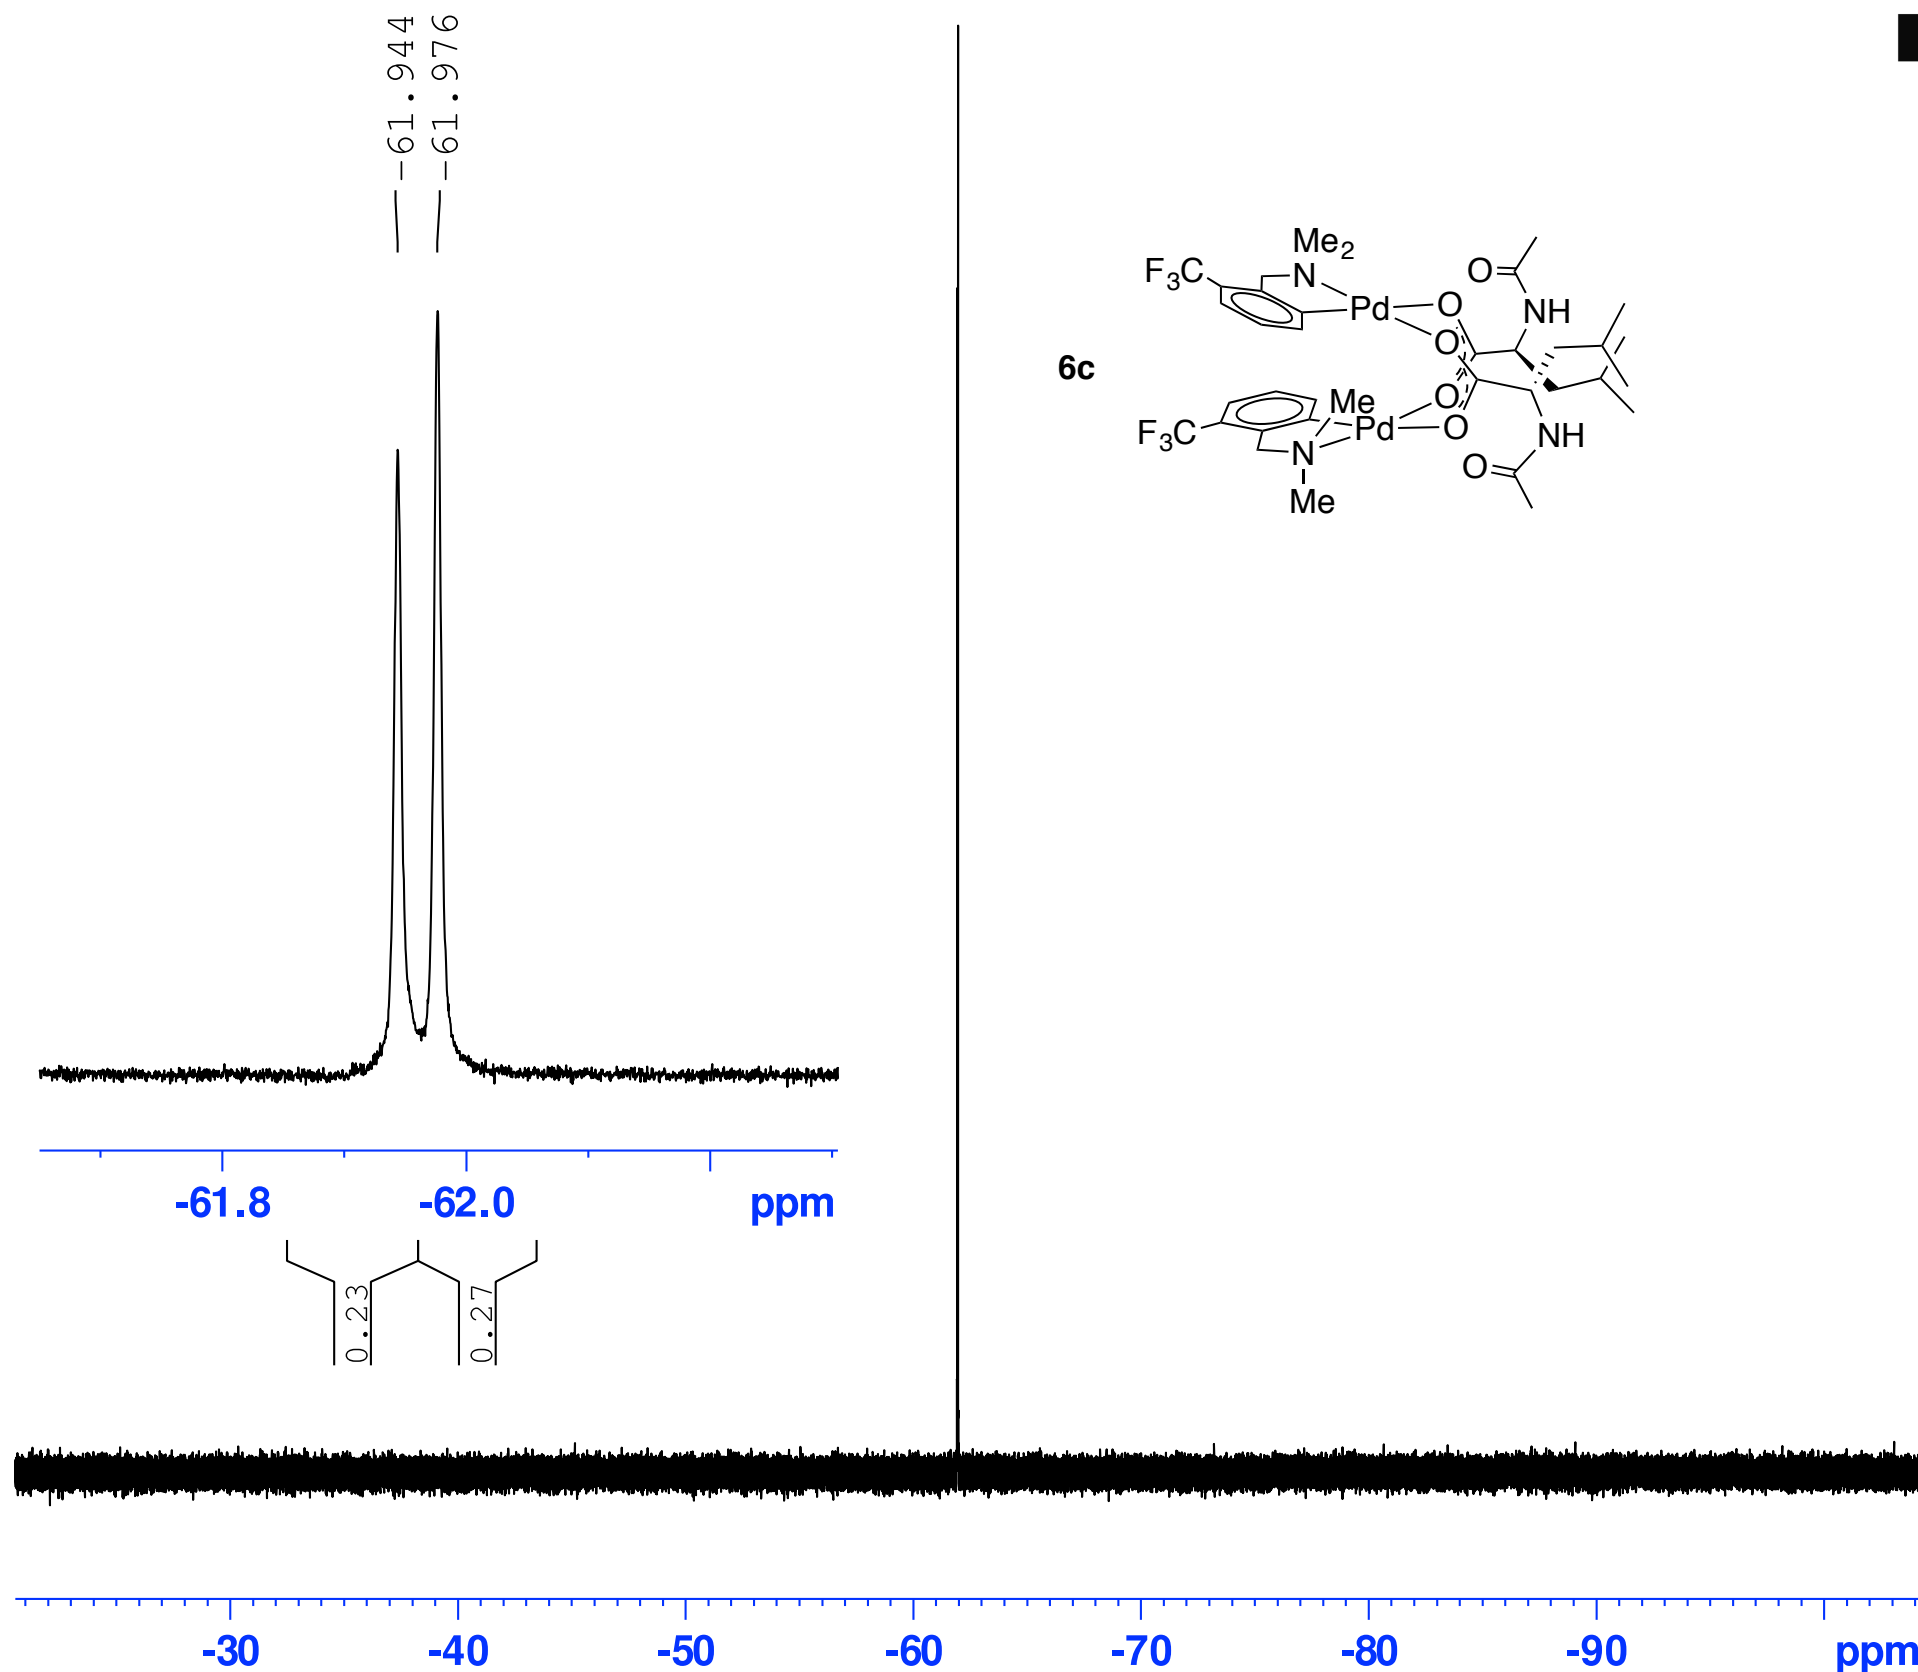

Current Data Parameters  
 NAME JJG07019  
 EXPNO 5  
 PROCNO 1

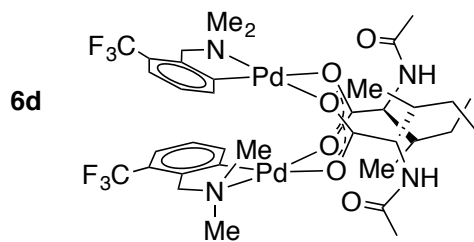

para to Pd  
+  
para to Pd'

ortho to Pd

ortho to Pd'  
+  
meta to Pd  
+  
meta to Pd'

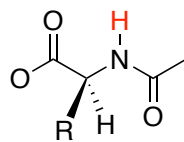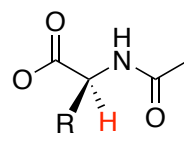

benzylic CH<sub>2</sub>

NMe toward pi face

NMe away from pi face

NMe' away from pi face

NMe' toward pi face

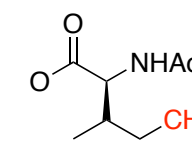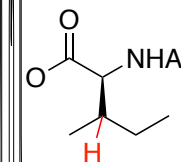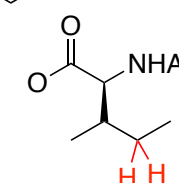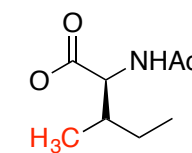

7.5 7.0 6.5 6.0 5.5 5.0 4.5 4.0 3.5 3.0 2.5 2.0 1.5 1.0 ppm

2.02  
0.97  
3.03

2.01

2.00

4.06

6.04

12.00  
2.07

1.99

2.01

6.08  
5.86

# COSY [Pd(o-CF<sub>3</sub>-dmba)(NAc-Ile)]<sub>2</sub>

6d

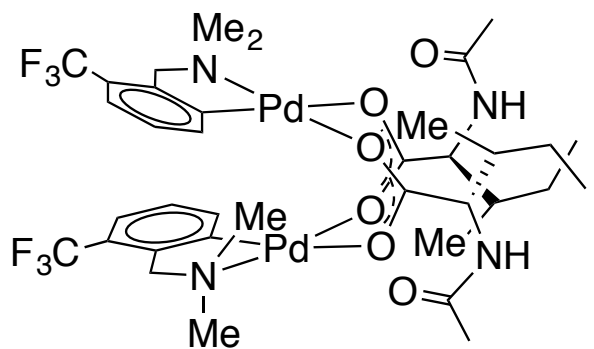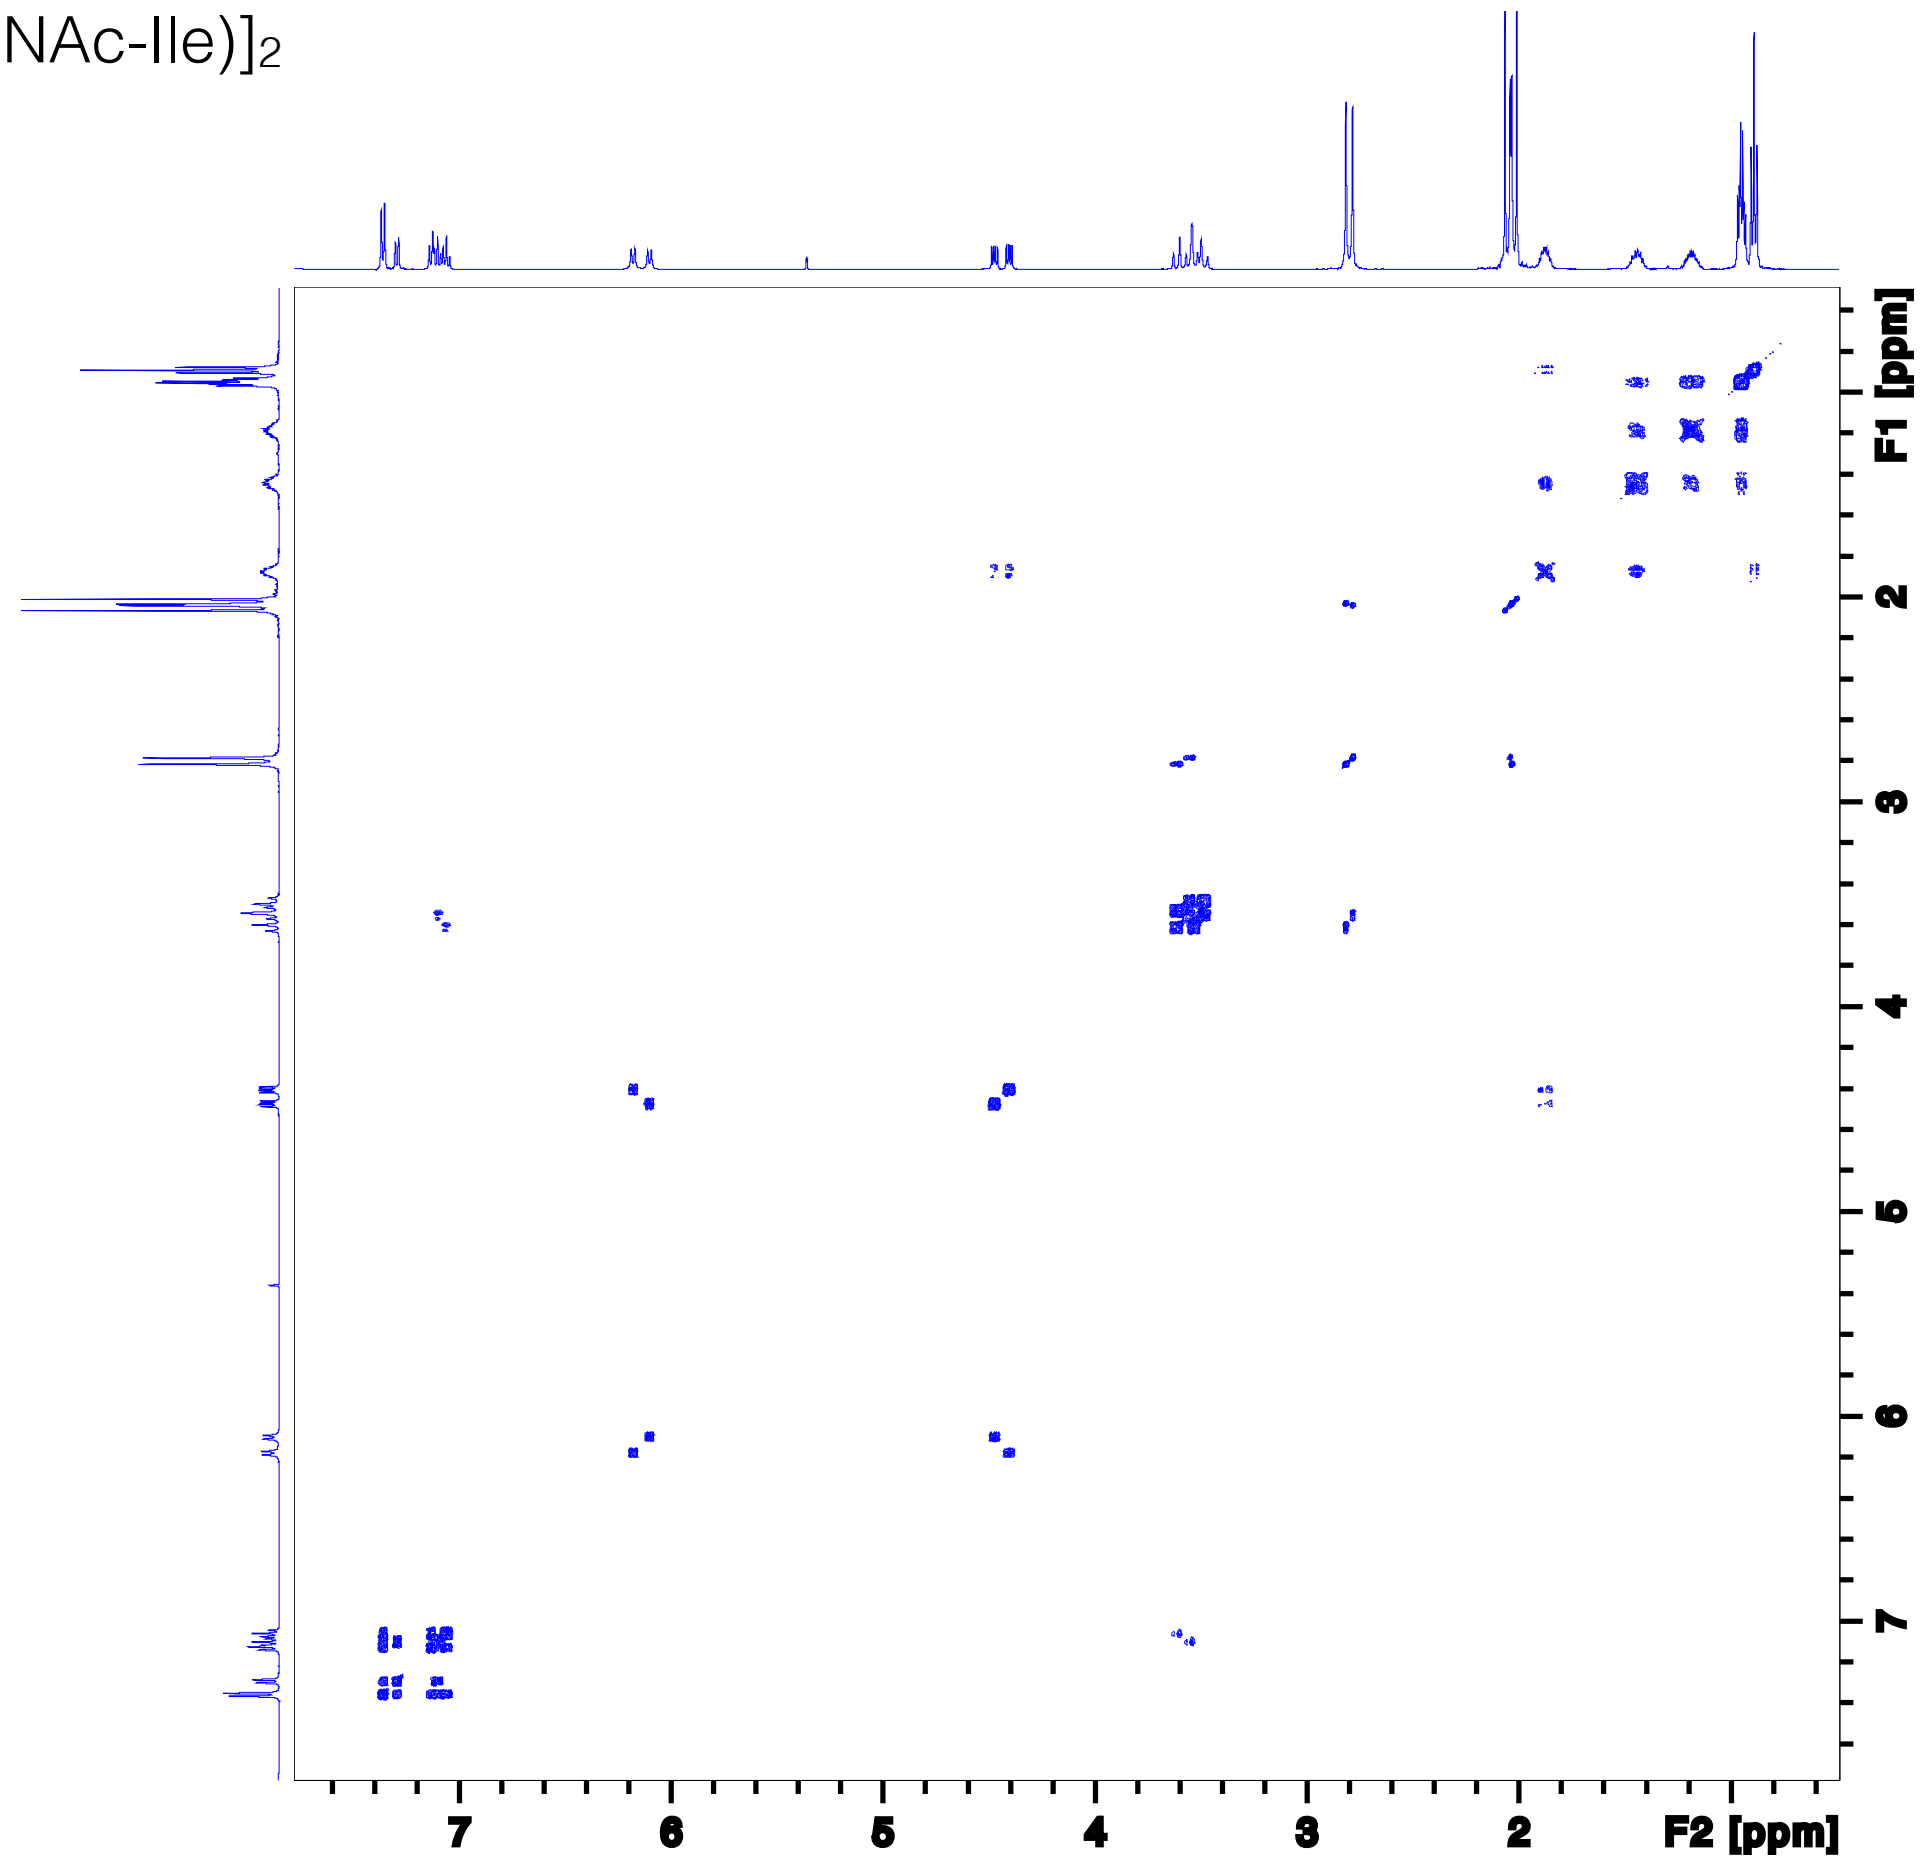

COSY aliphatic  
 [Pd(o-CF<sub>3</sub>-dmba)(NAc-Ile)]<sub>2</sub>

6d

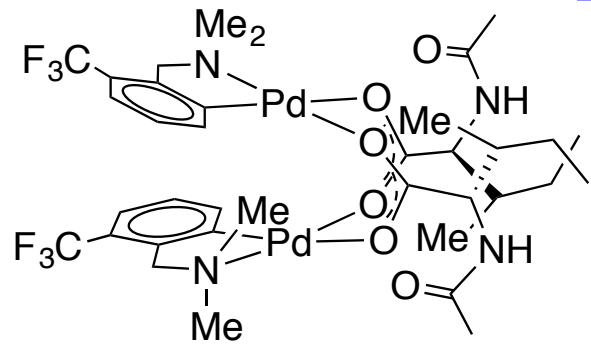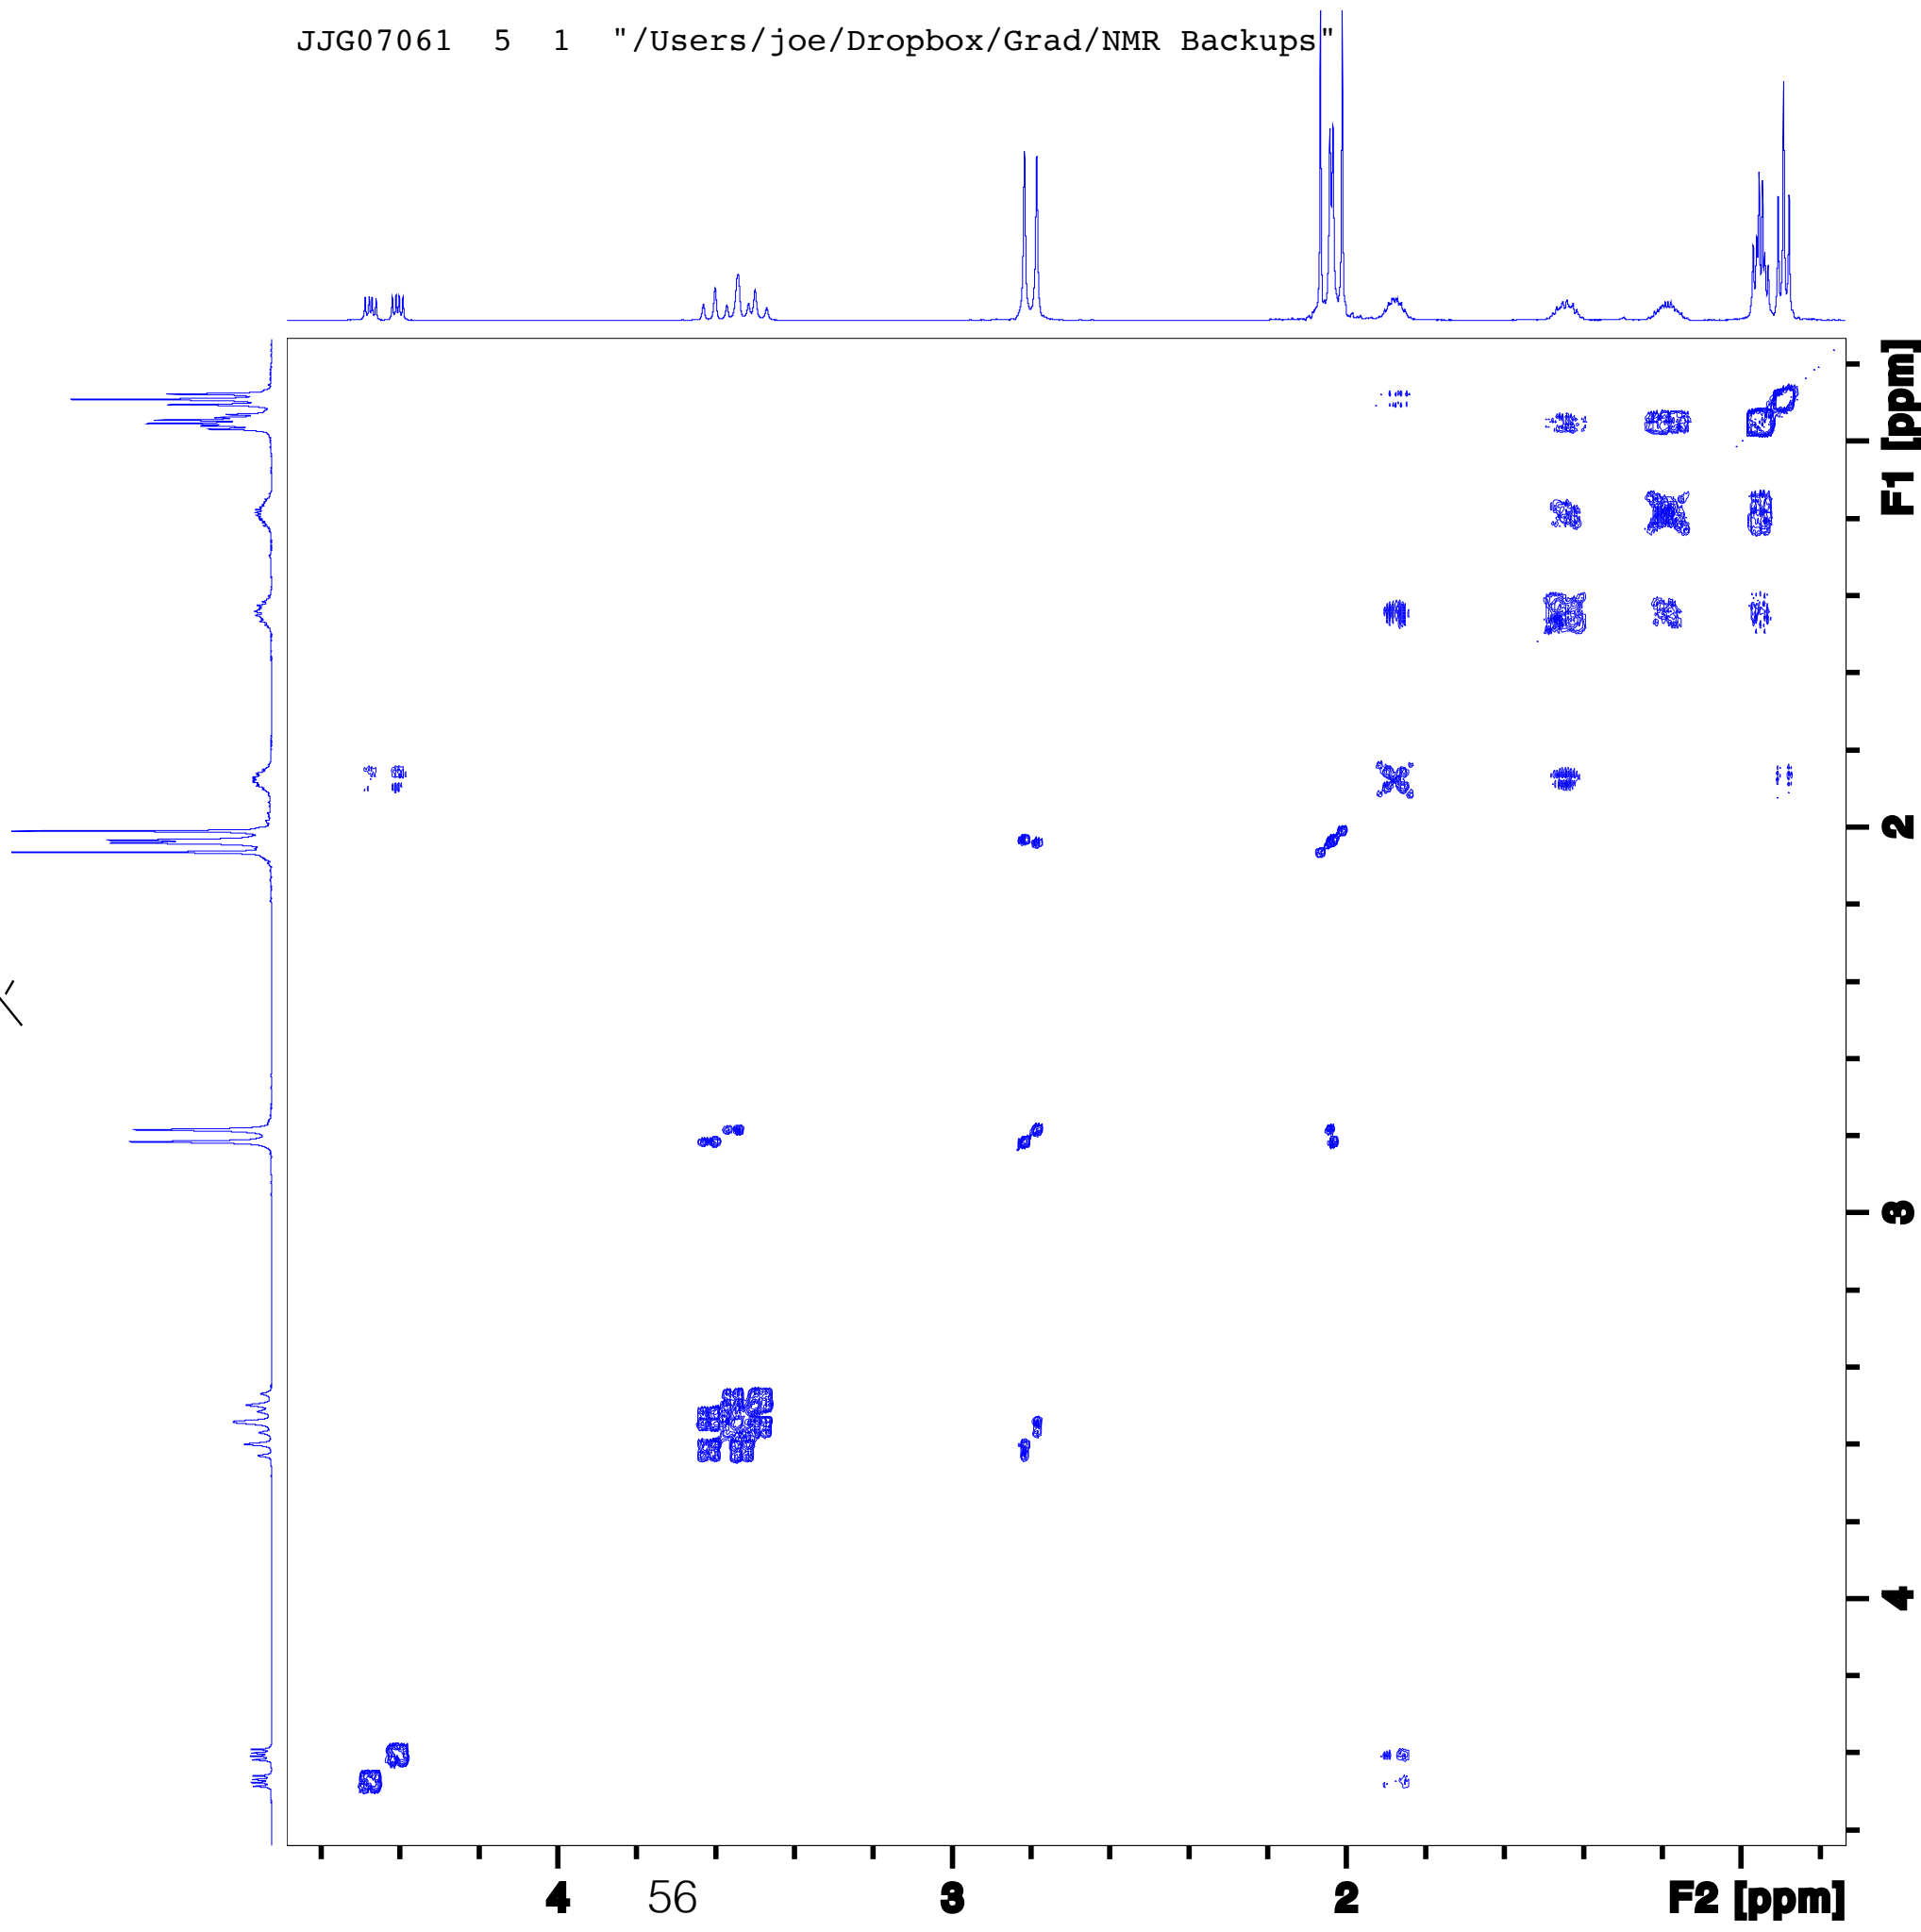

COSY aromatic  
 [Pd(o-CF<sub>3</sub>-dmba)(NAC-Ile)]<sub>2</sub>

6d

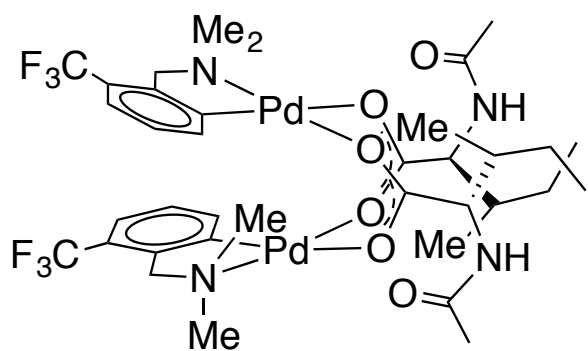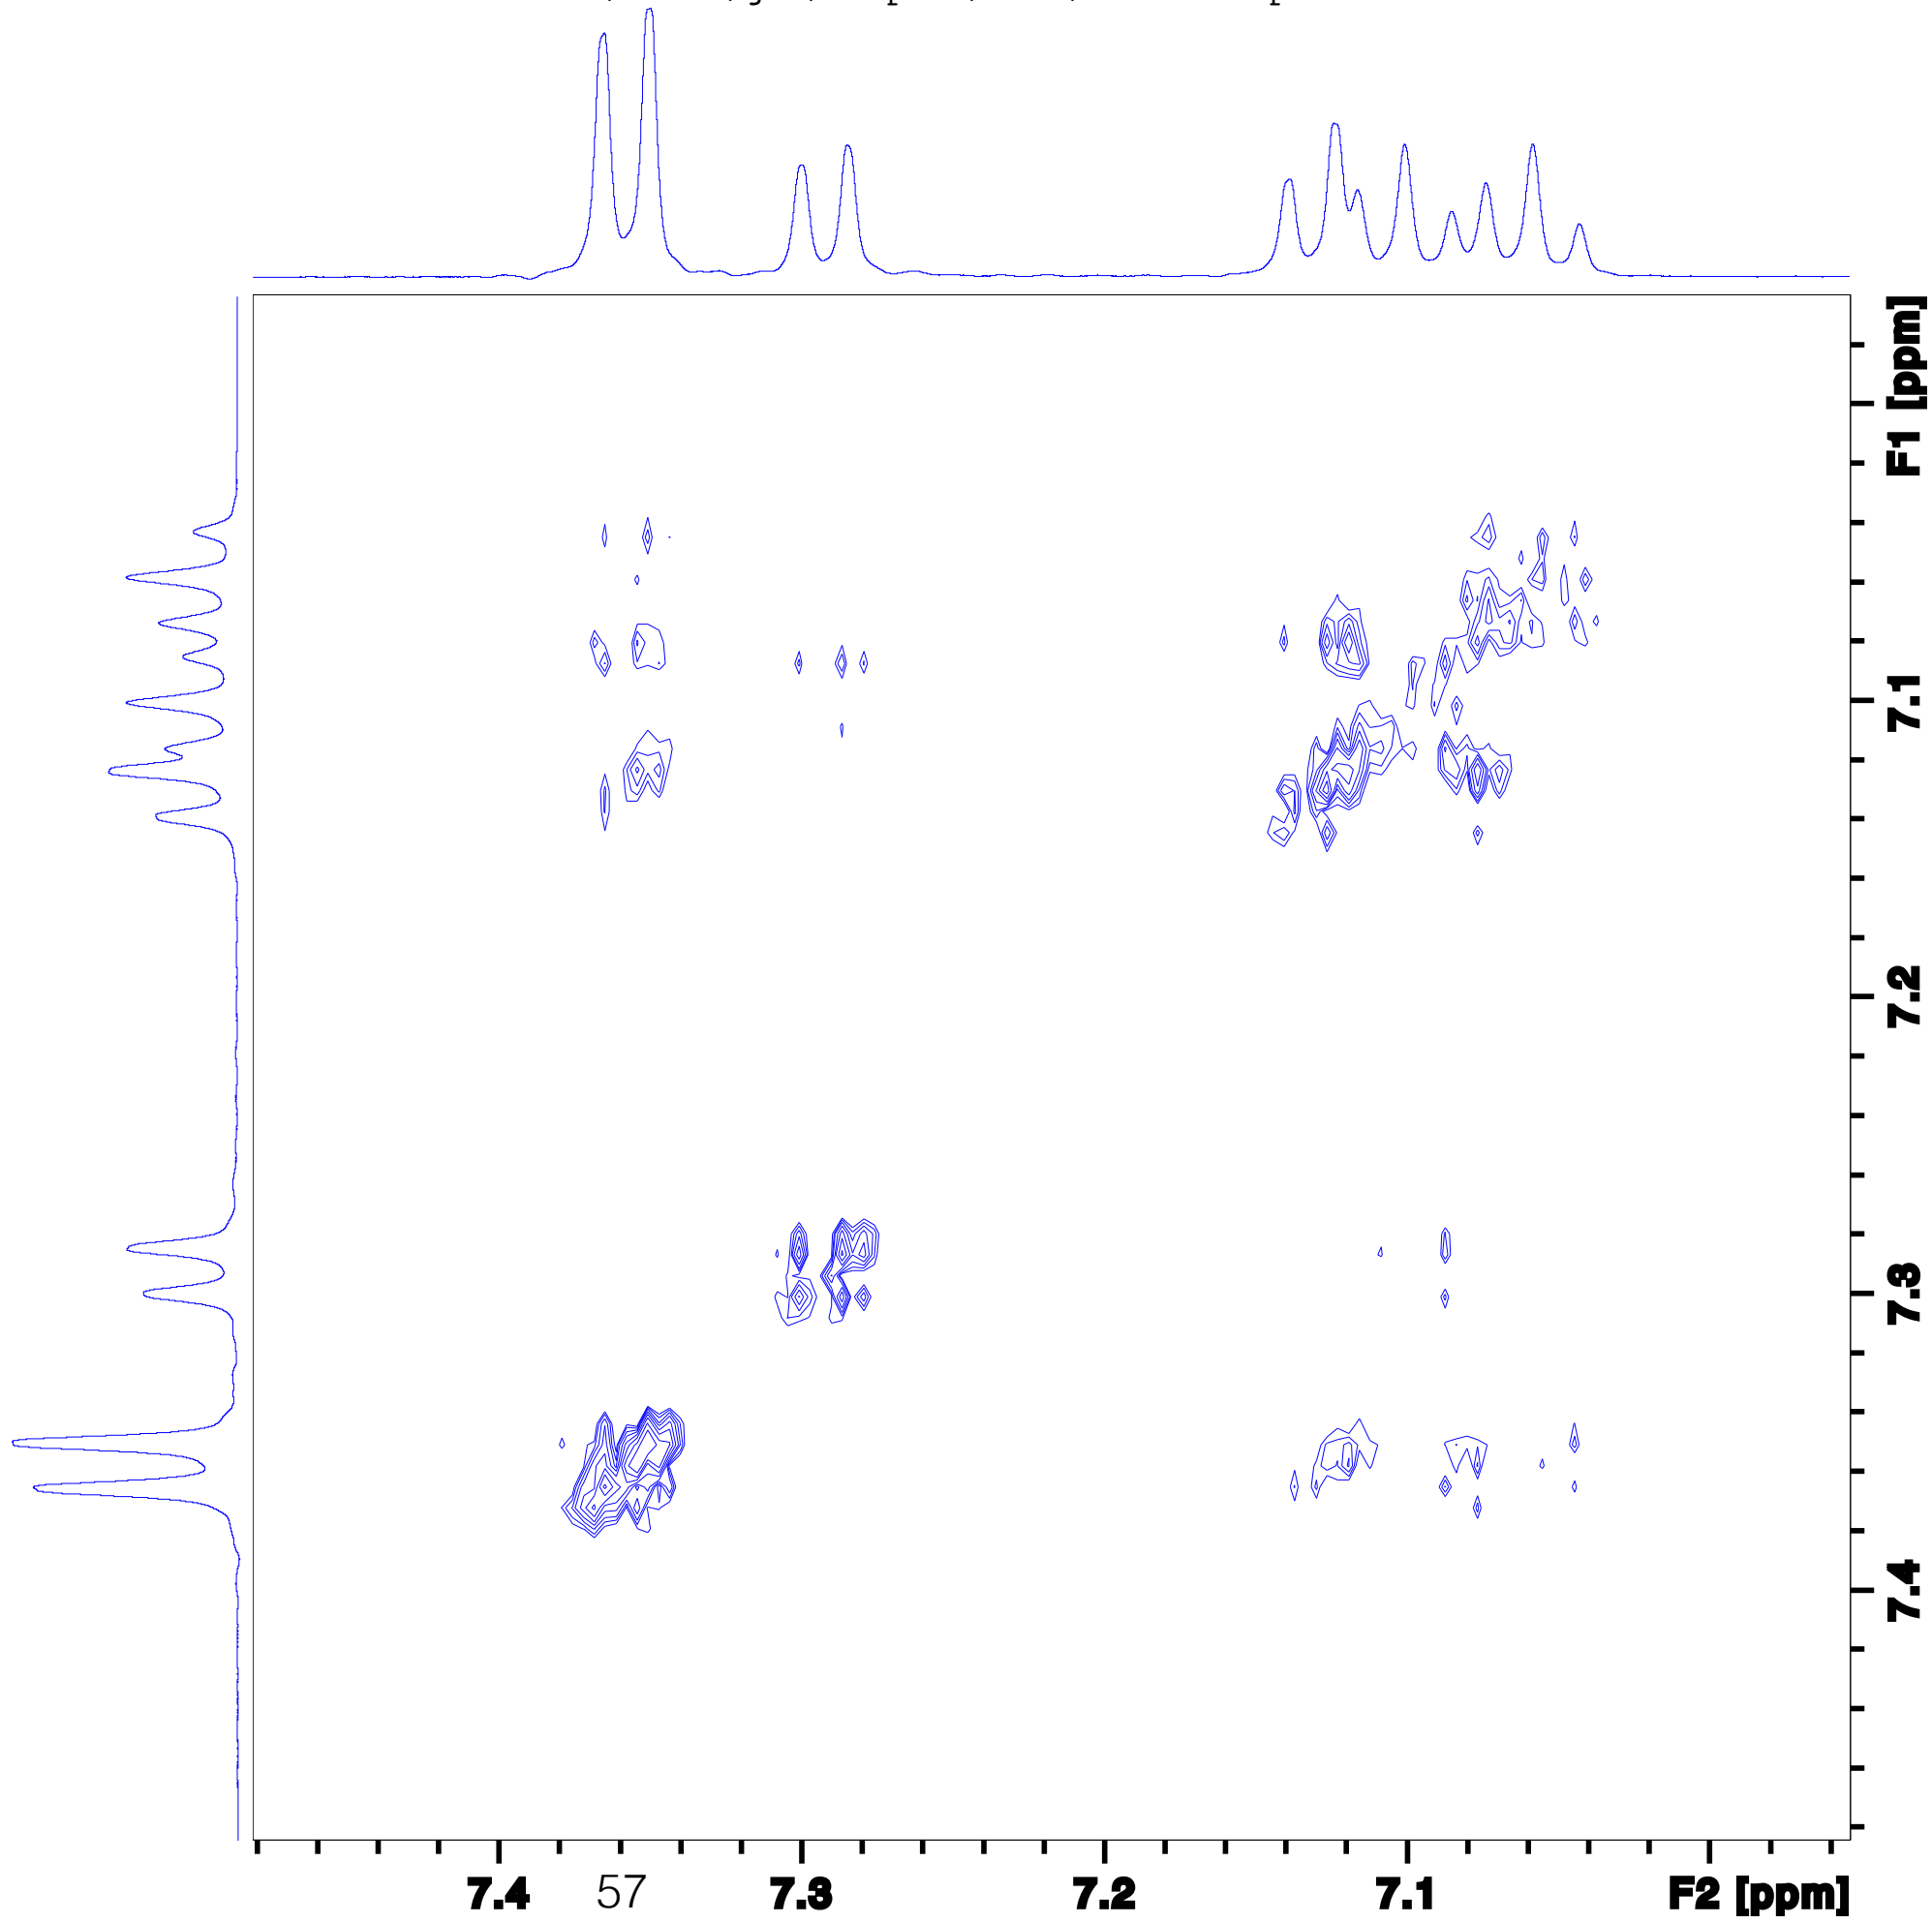

7.4 57 7.3 7.2 7.1 F2 [ppm]

F1 [ppm]  
 7.1  
 7.2  
 7.3  
 7.4

NOESY [Pd(o-CF<sub>3</sub>-dmba)(NAc-Ile)]<sub>2</sub>

6d

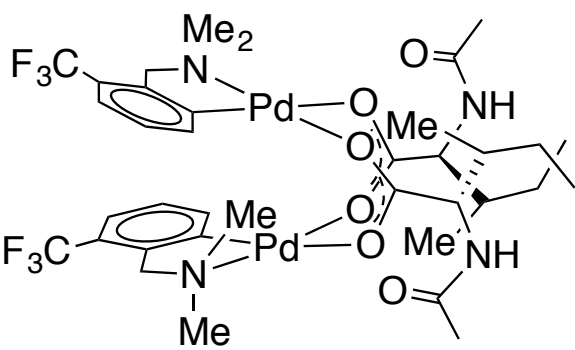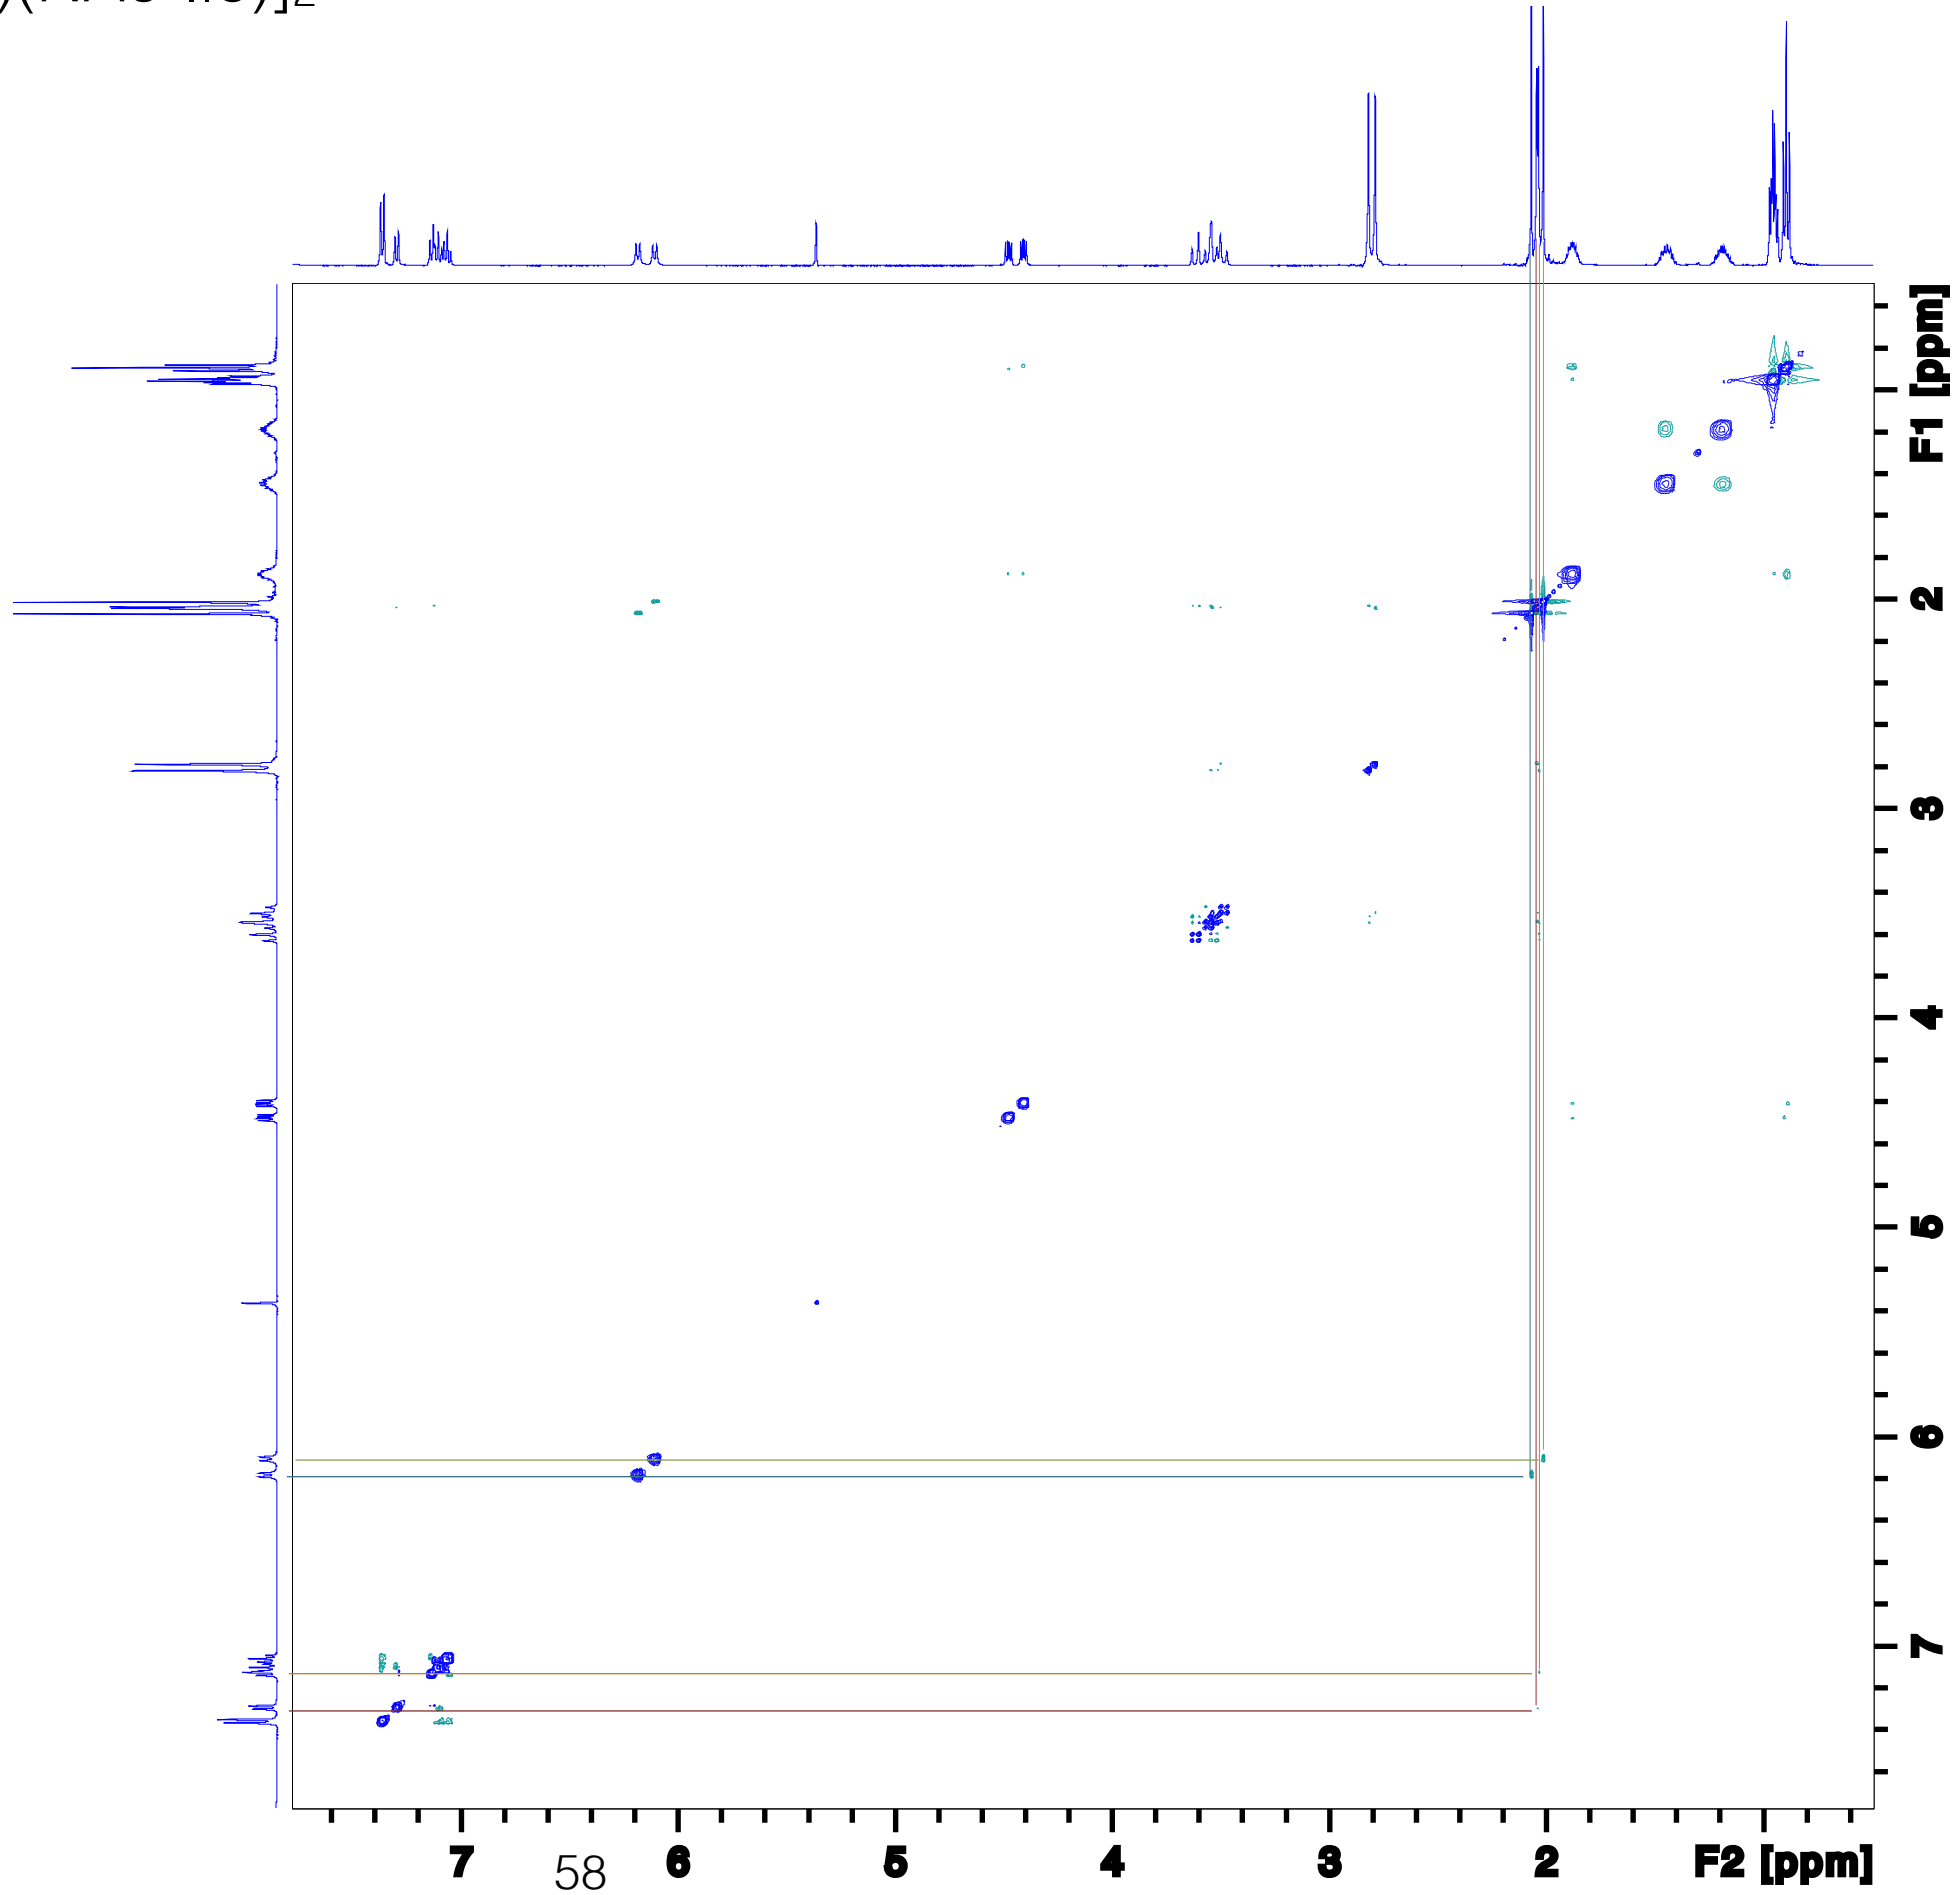

# Key NOE cross peaks [Pd(o-CF<sub>3</sub>-dmba)(NAc-Ile)]<sub>2</sub>

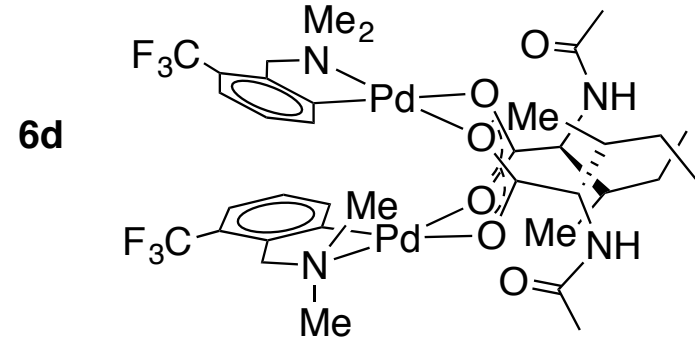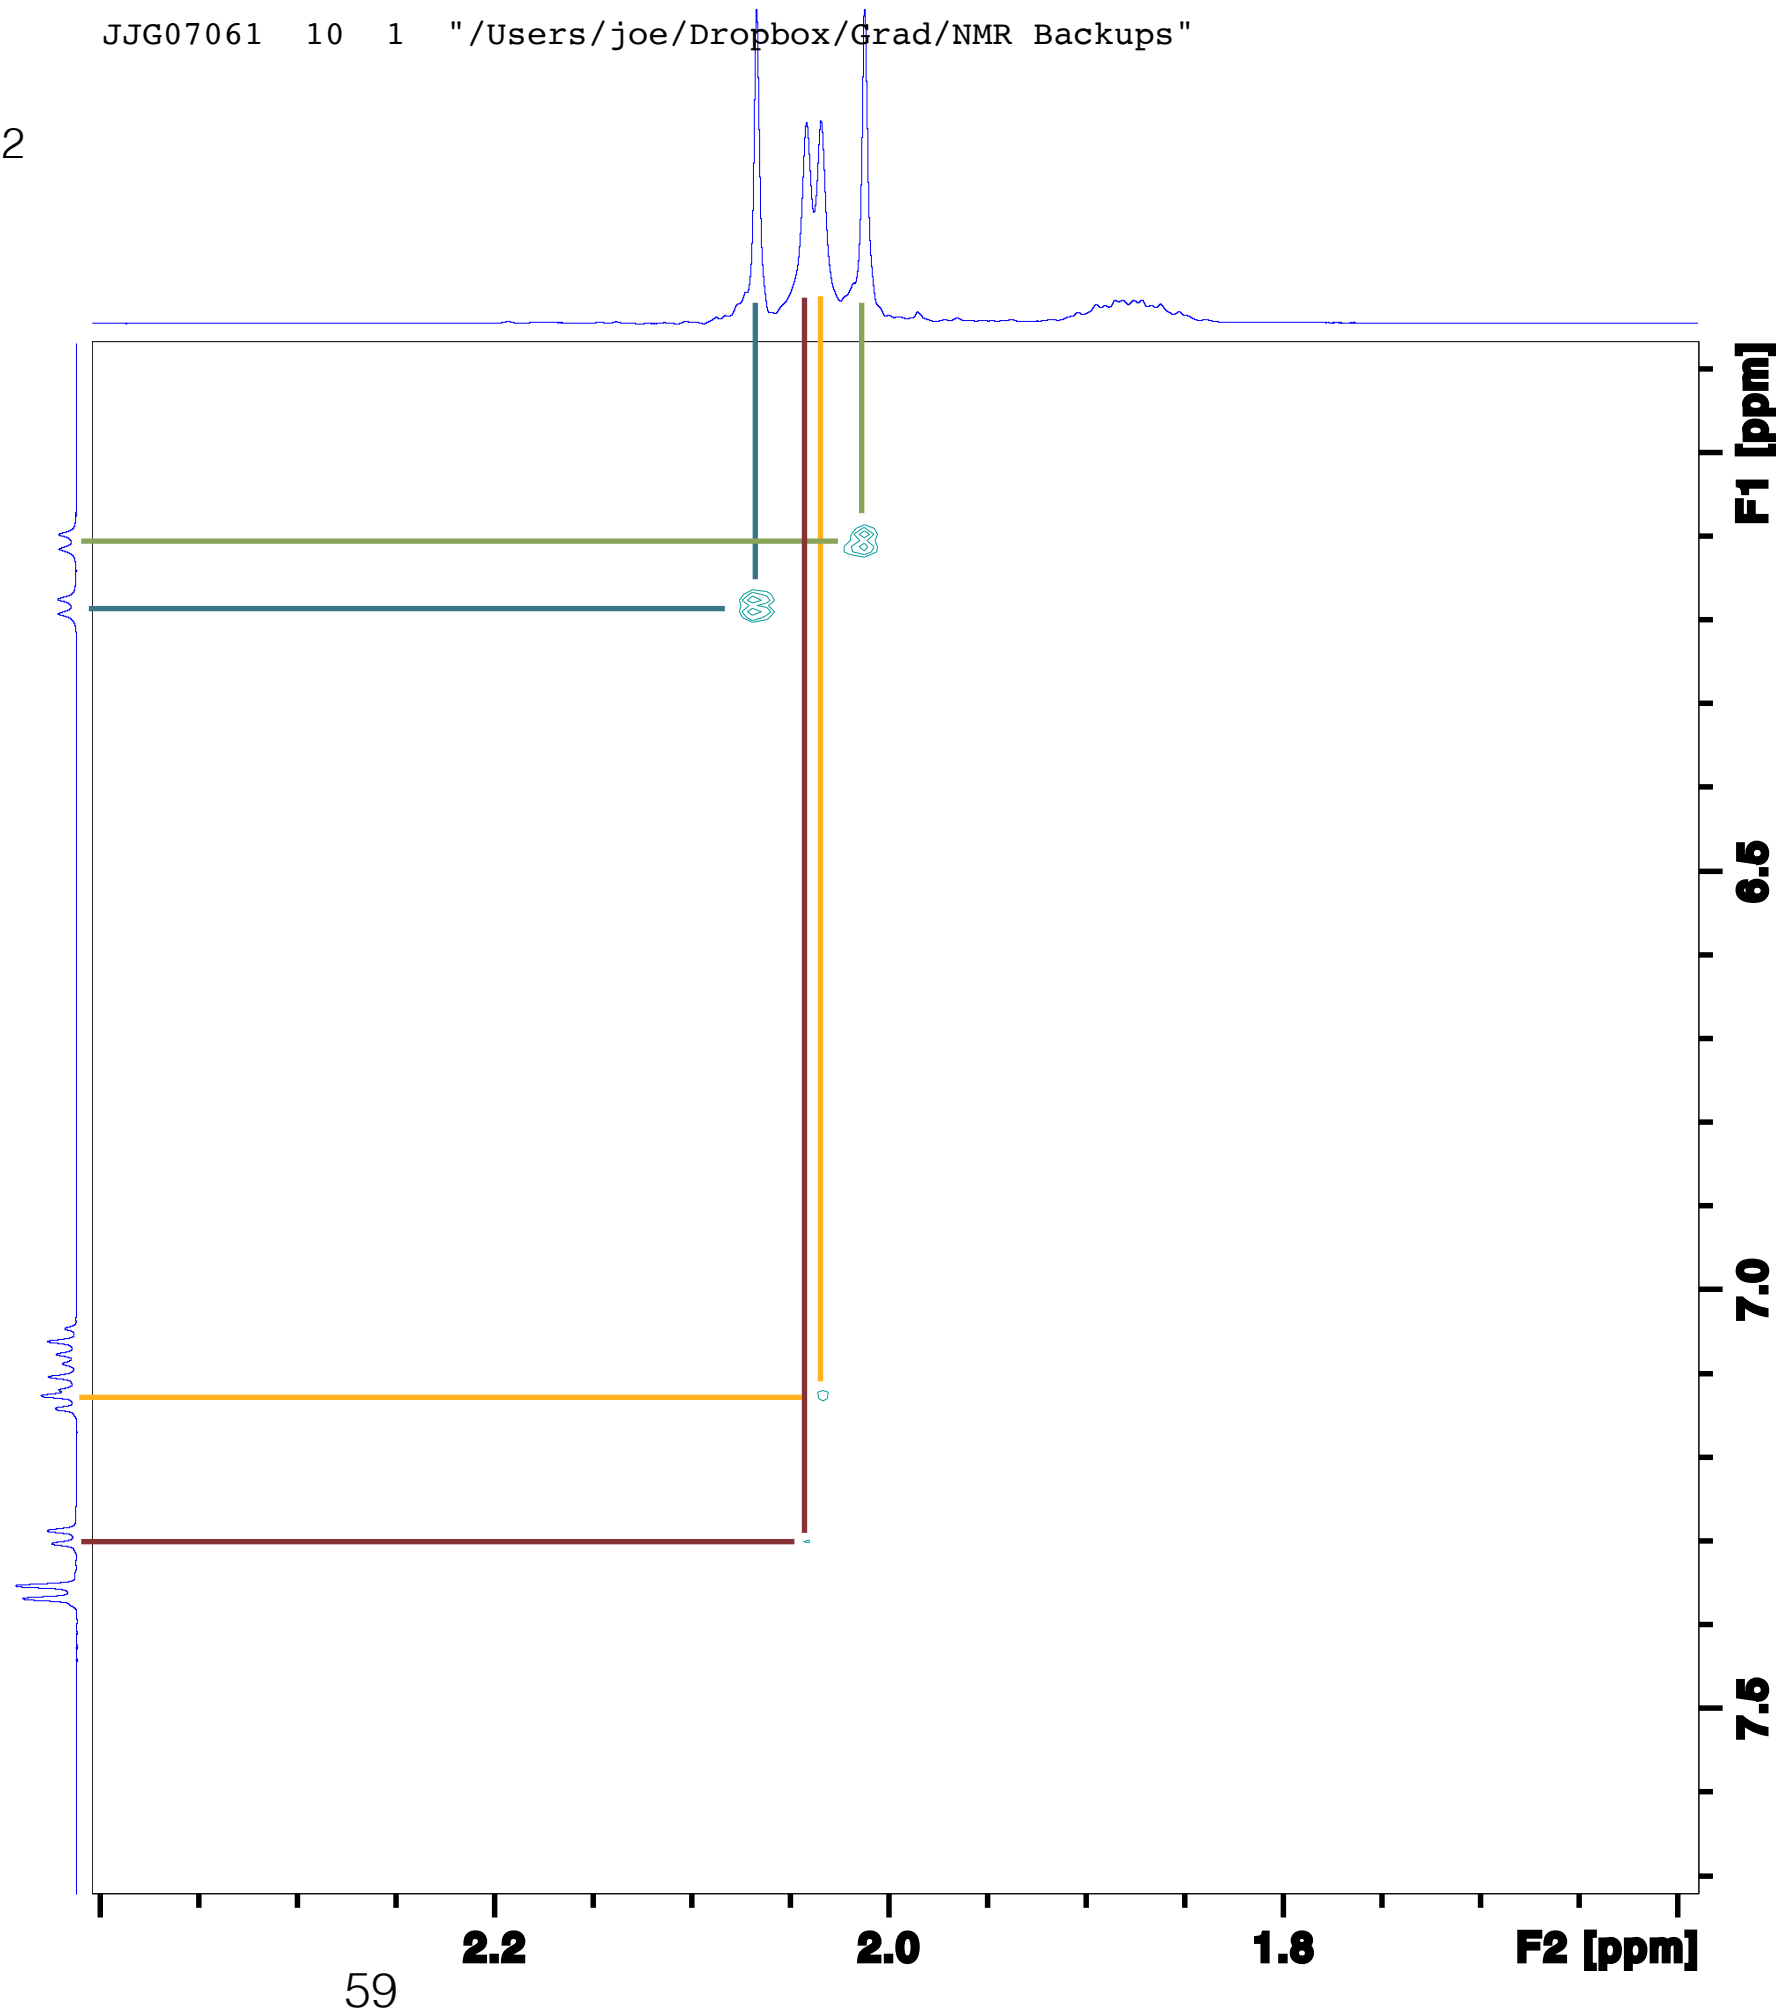

weak NOE cross peaks  
between MPAA and substrate  
[Pd(o-CF<sub>3</sub>-dmba)(NAc-Ile)]<sub>2</sub>

6d

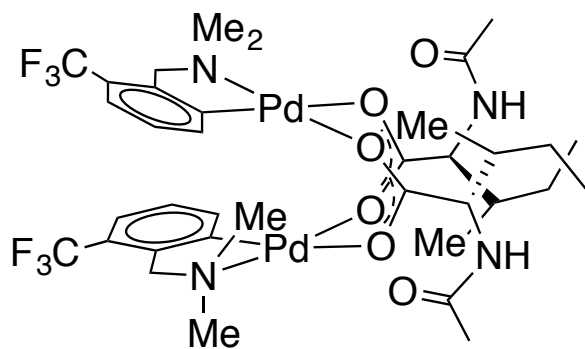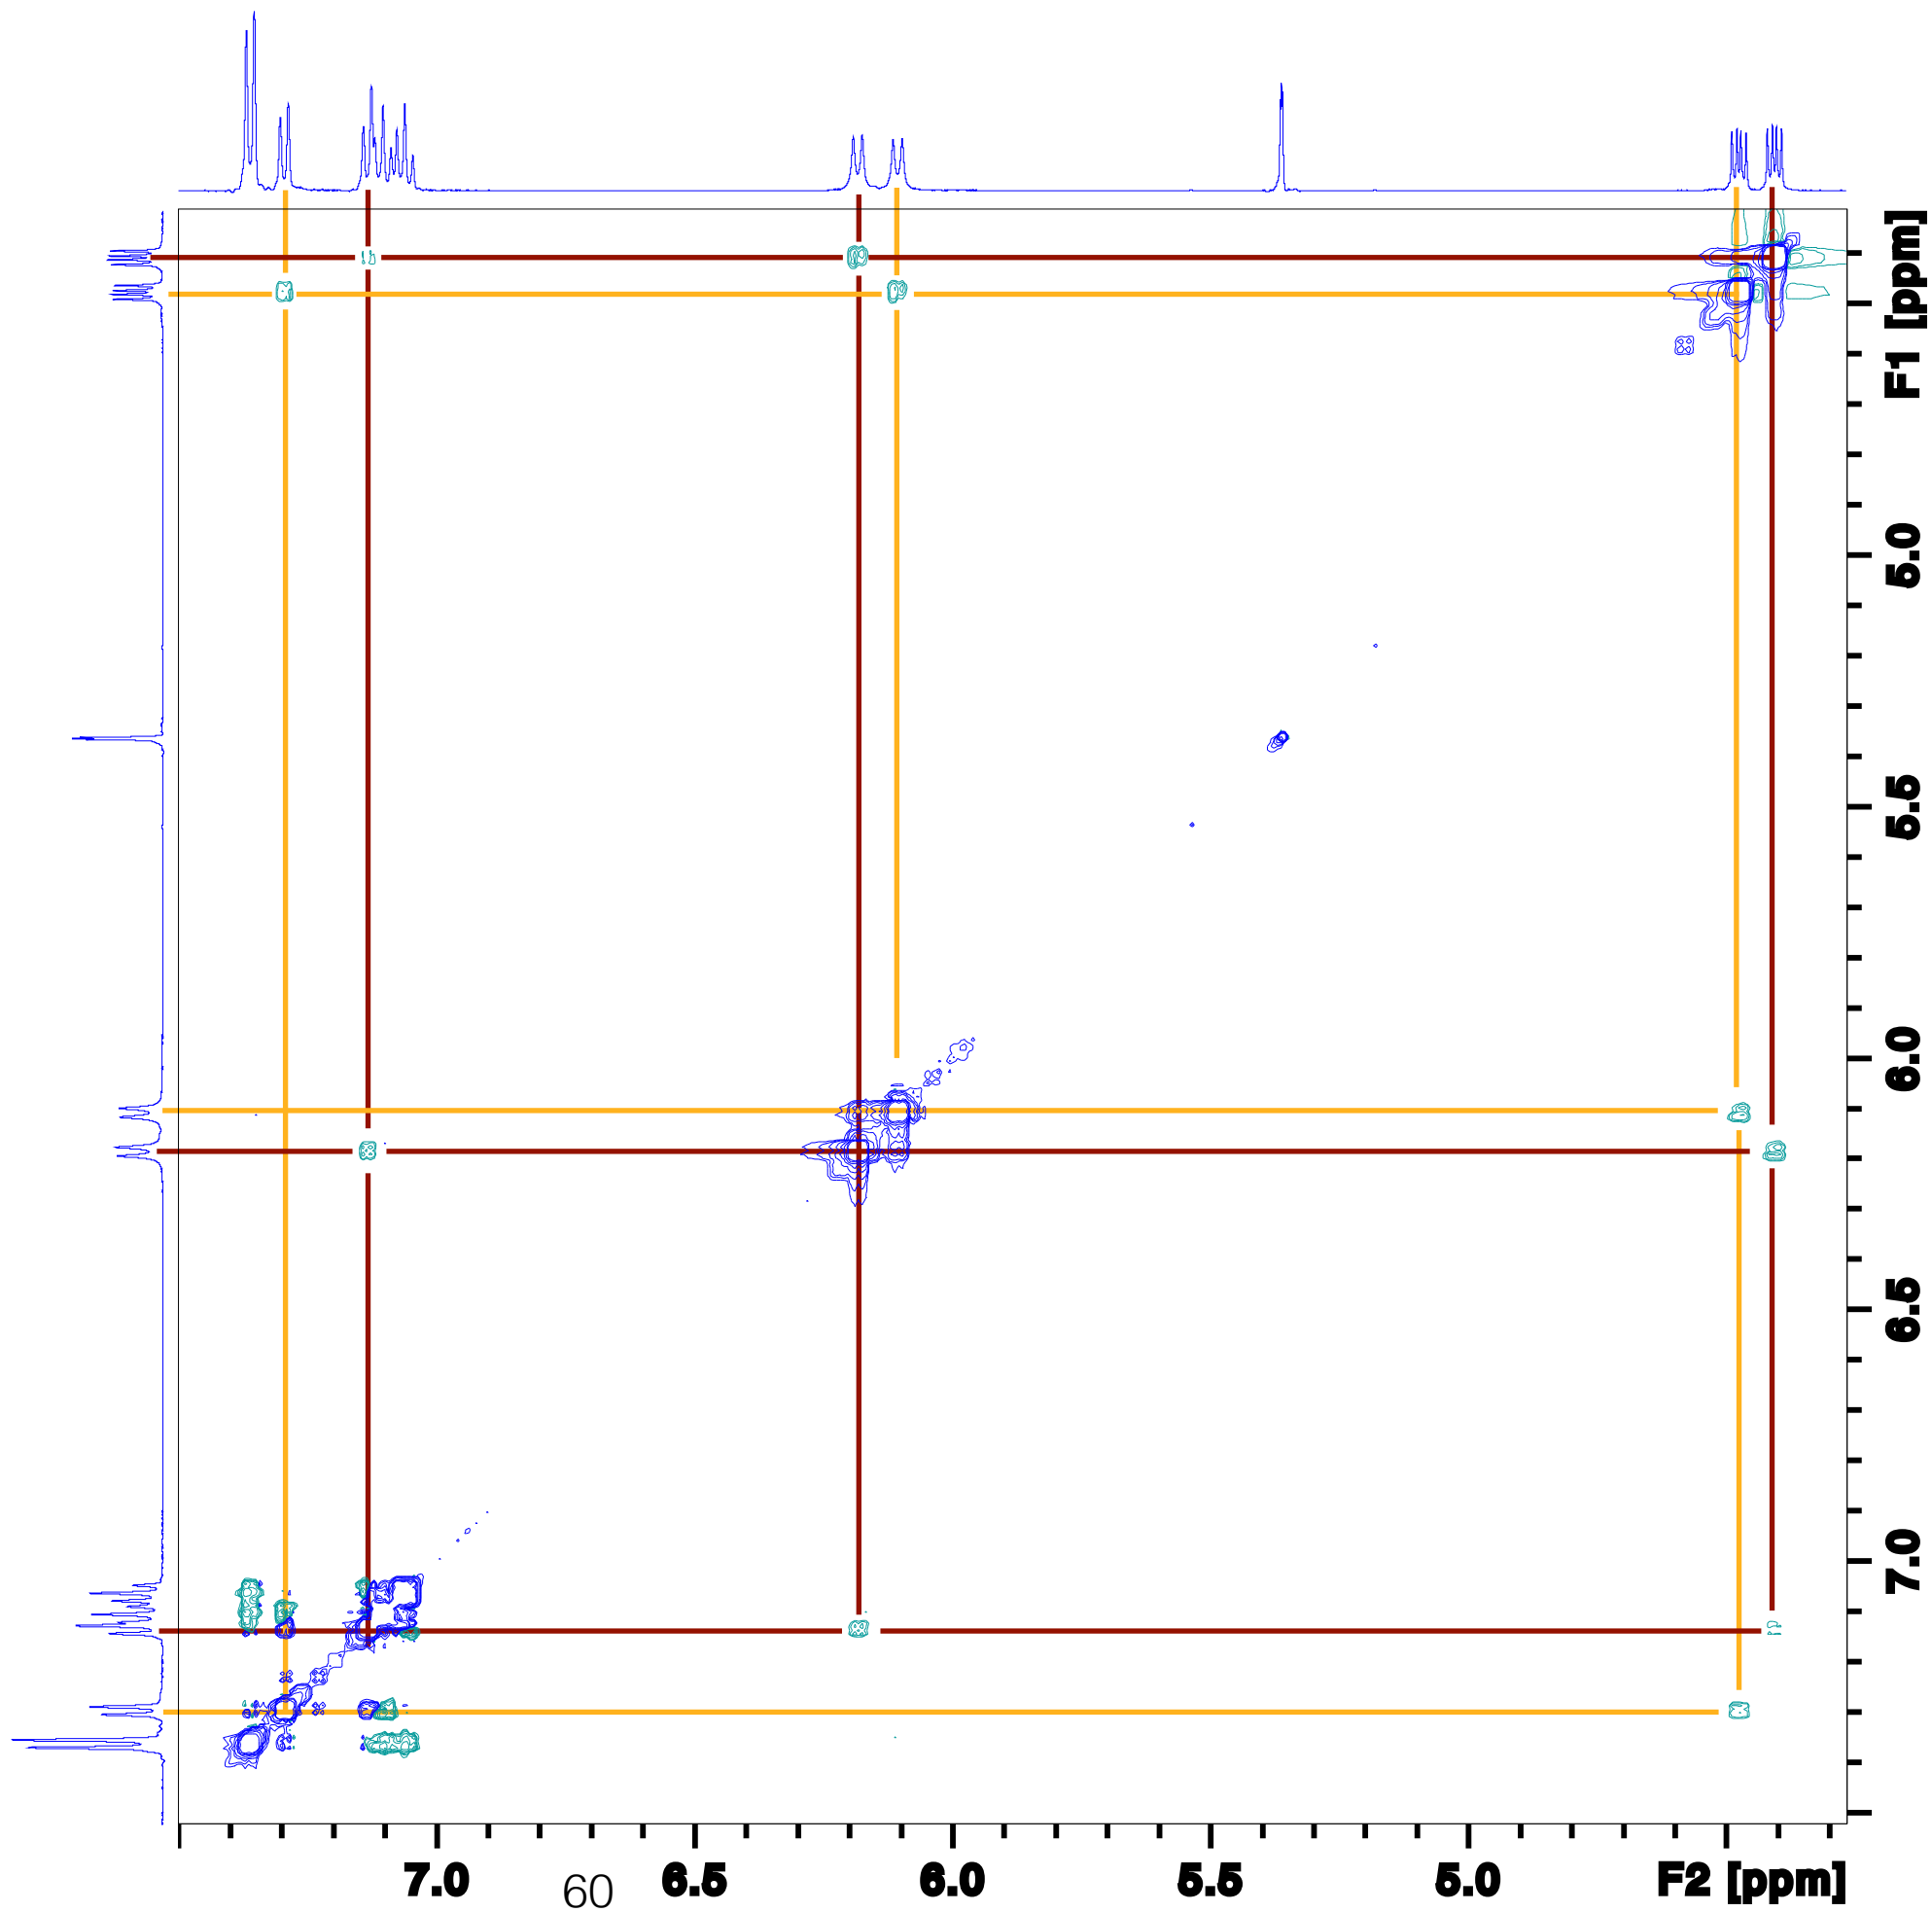



$^{13}\text{C}$  [Pd(o-CF<sub>3</sub>-dmba)(NAc-Ile)]<sub>2</sub>

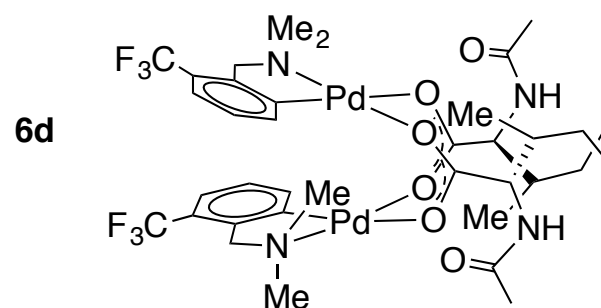

180.5876  
180.4444  
169.0684  
169.0401  
145.7696  
145.7288  
143.6801  
143.5425  
135.8208  
135.4616  
127.1678  
124.9898  
124.8468  
124.4924  
124.3415  
124.1809  
124.0884  
122.8166  
121.8209  
120.6384  
70.9591  
70.2240  
59.9066  
59.1947  
52.7722  
51.7192  
51.4738  
38.2461  
38.1964  
25.2197  
25.1712  
23.1939  
23.1242  
15.4845  
15.4000  
11.4886  
11.4789

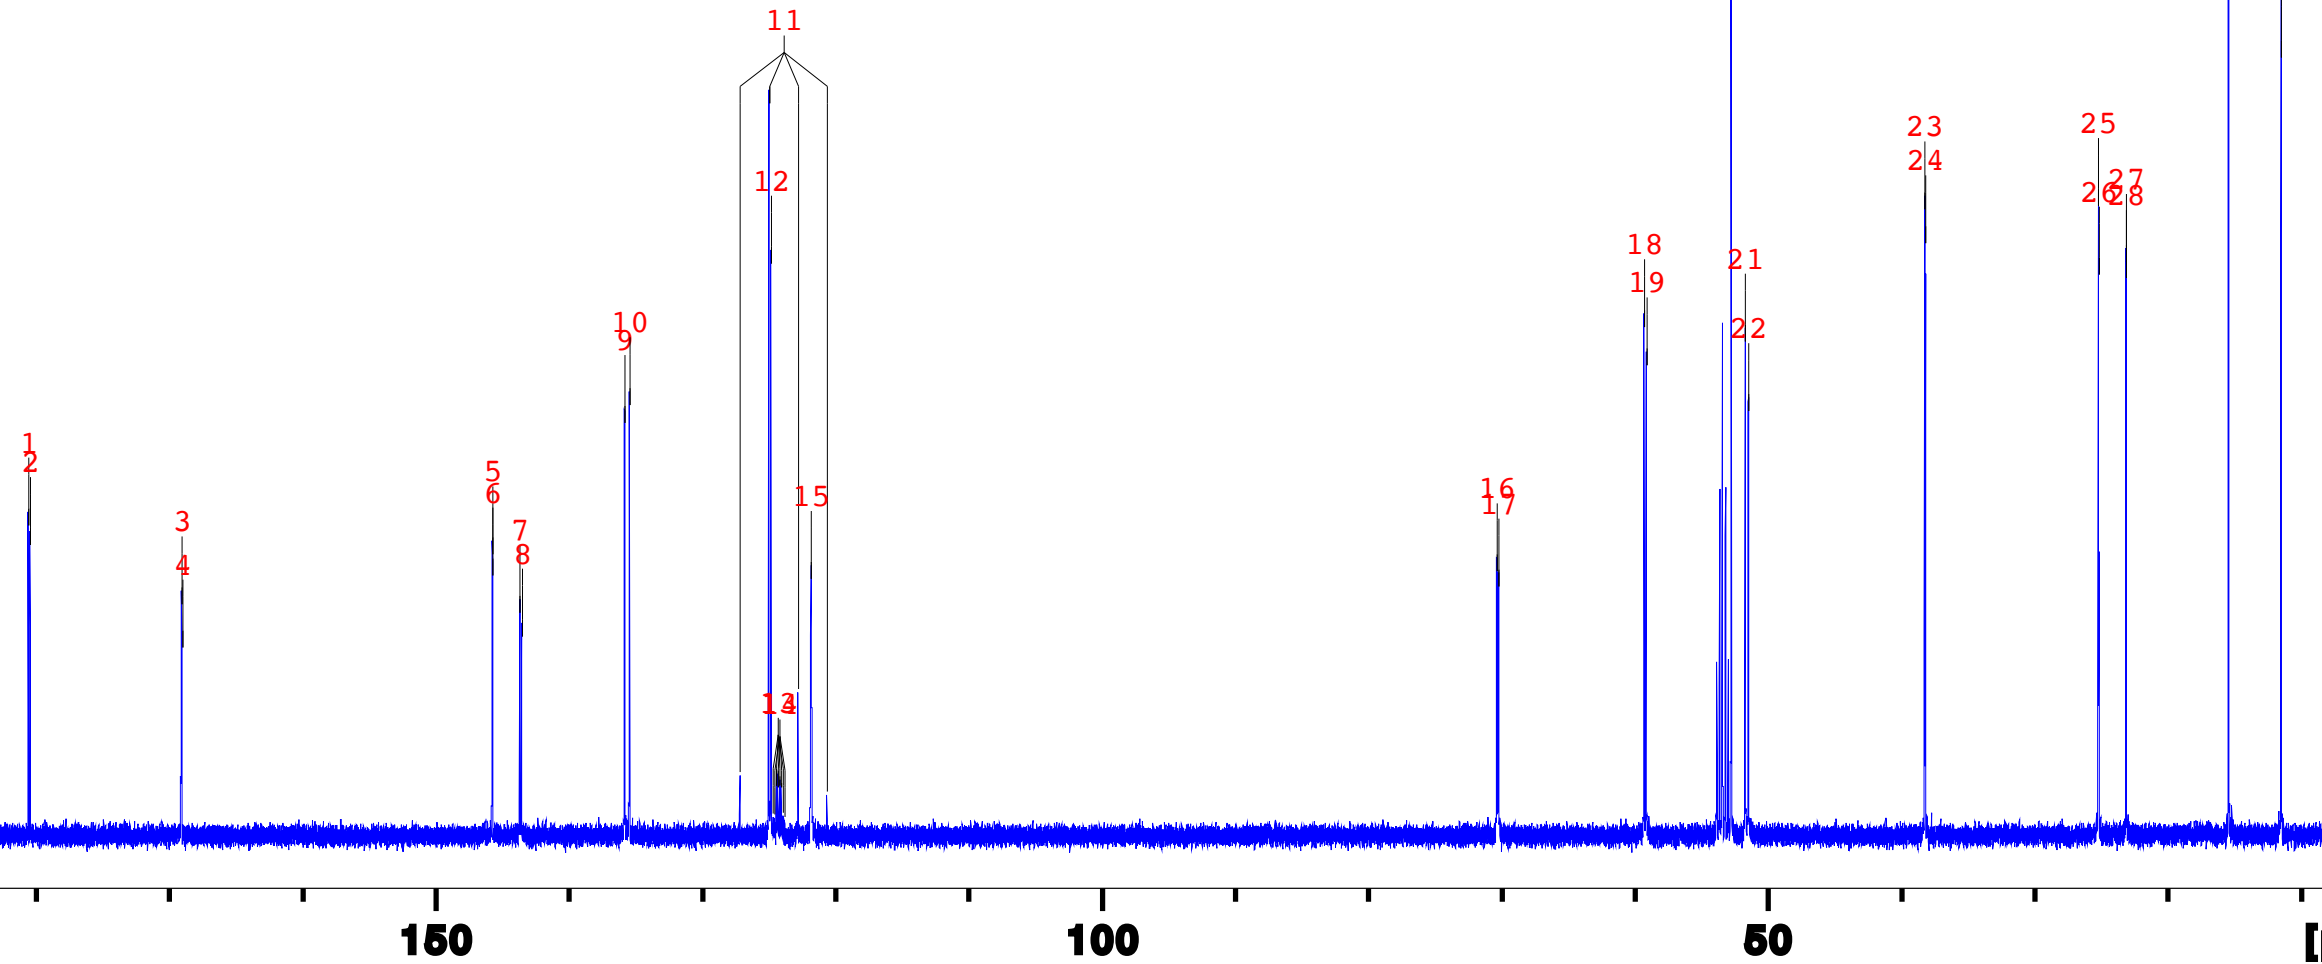

# HMQC

JJG07061 6 1 "/Users/joe/Dropbox/Grad/NMR Backups"

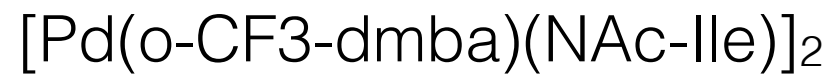

6d

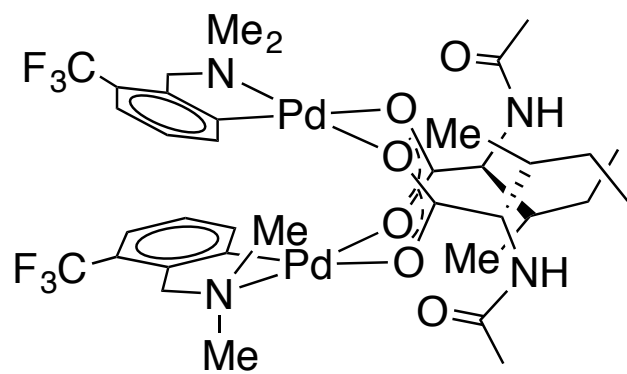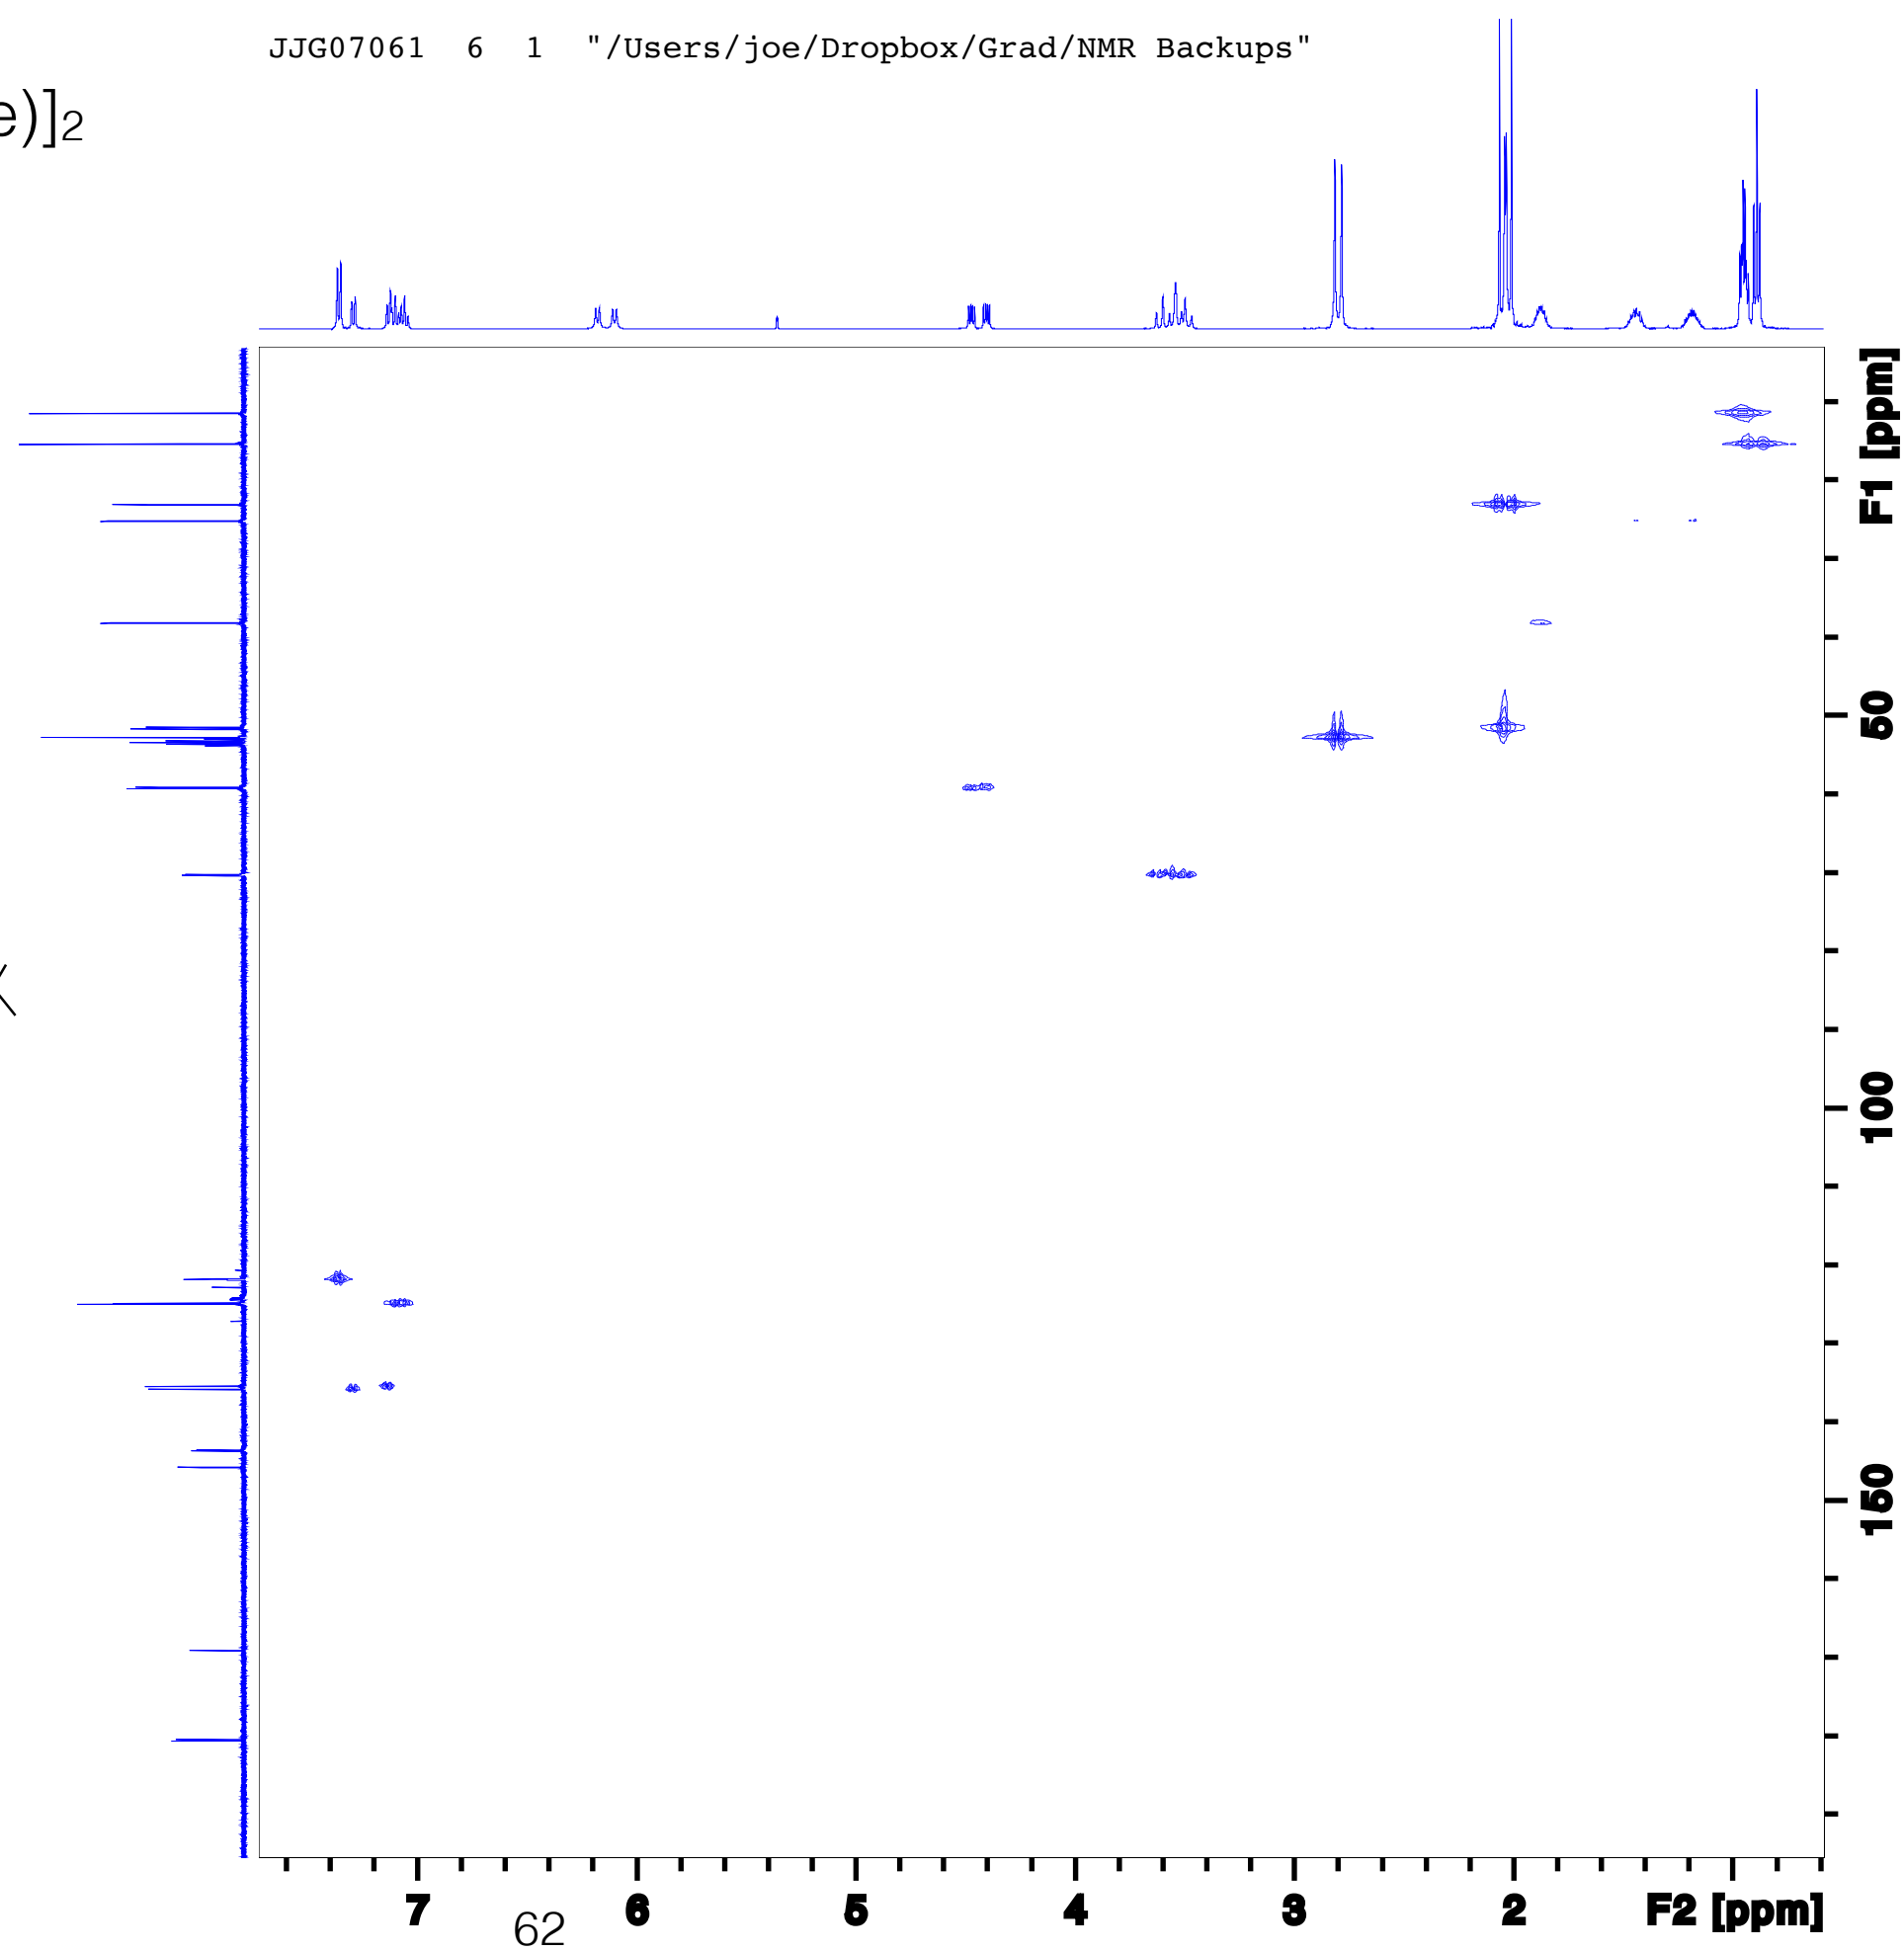

<sup>13</sup>C 7-27 ppm  
[Pd(o-CF<sub>3</sub>-dmba)(NAc-Ile)]<sub>2</sub>

JJG07019 7 1 "/Users/joe/Dropbox/Grad/NMR Backups"

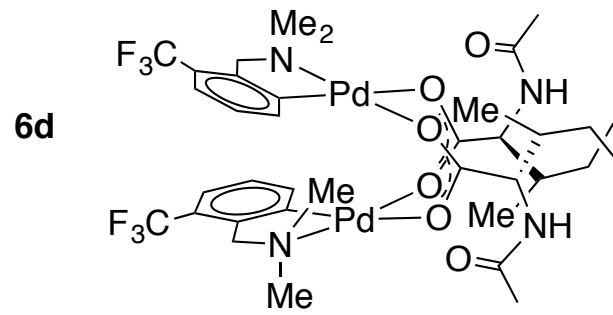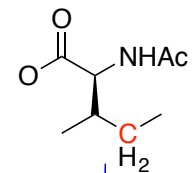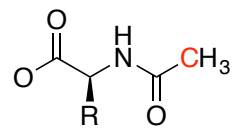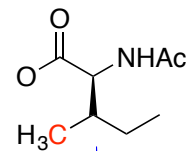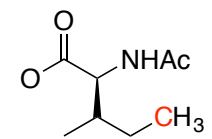

25.2187  
25.1712

28.1889  
28.1242

15.4846  
15.4000

11.4886  
11.4789

25

20

63

15

[ppm]

[rel]

25

20

15

10

5

0

$^{13}\text{C}$  HMQC 7-27 ppm  
[Pd(o-CF<sub>3</sub>-dmba)(NAc-Ile)]<sub>2</sub>

JJG07061 6 1 "/Users/joe/Dropbox/Grad/NMR Backups"

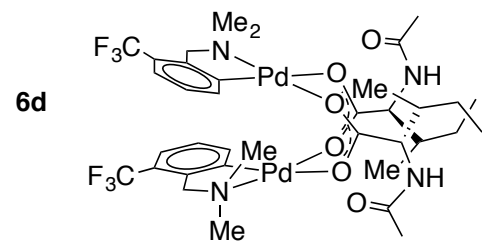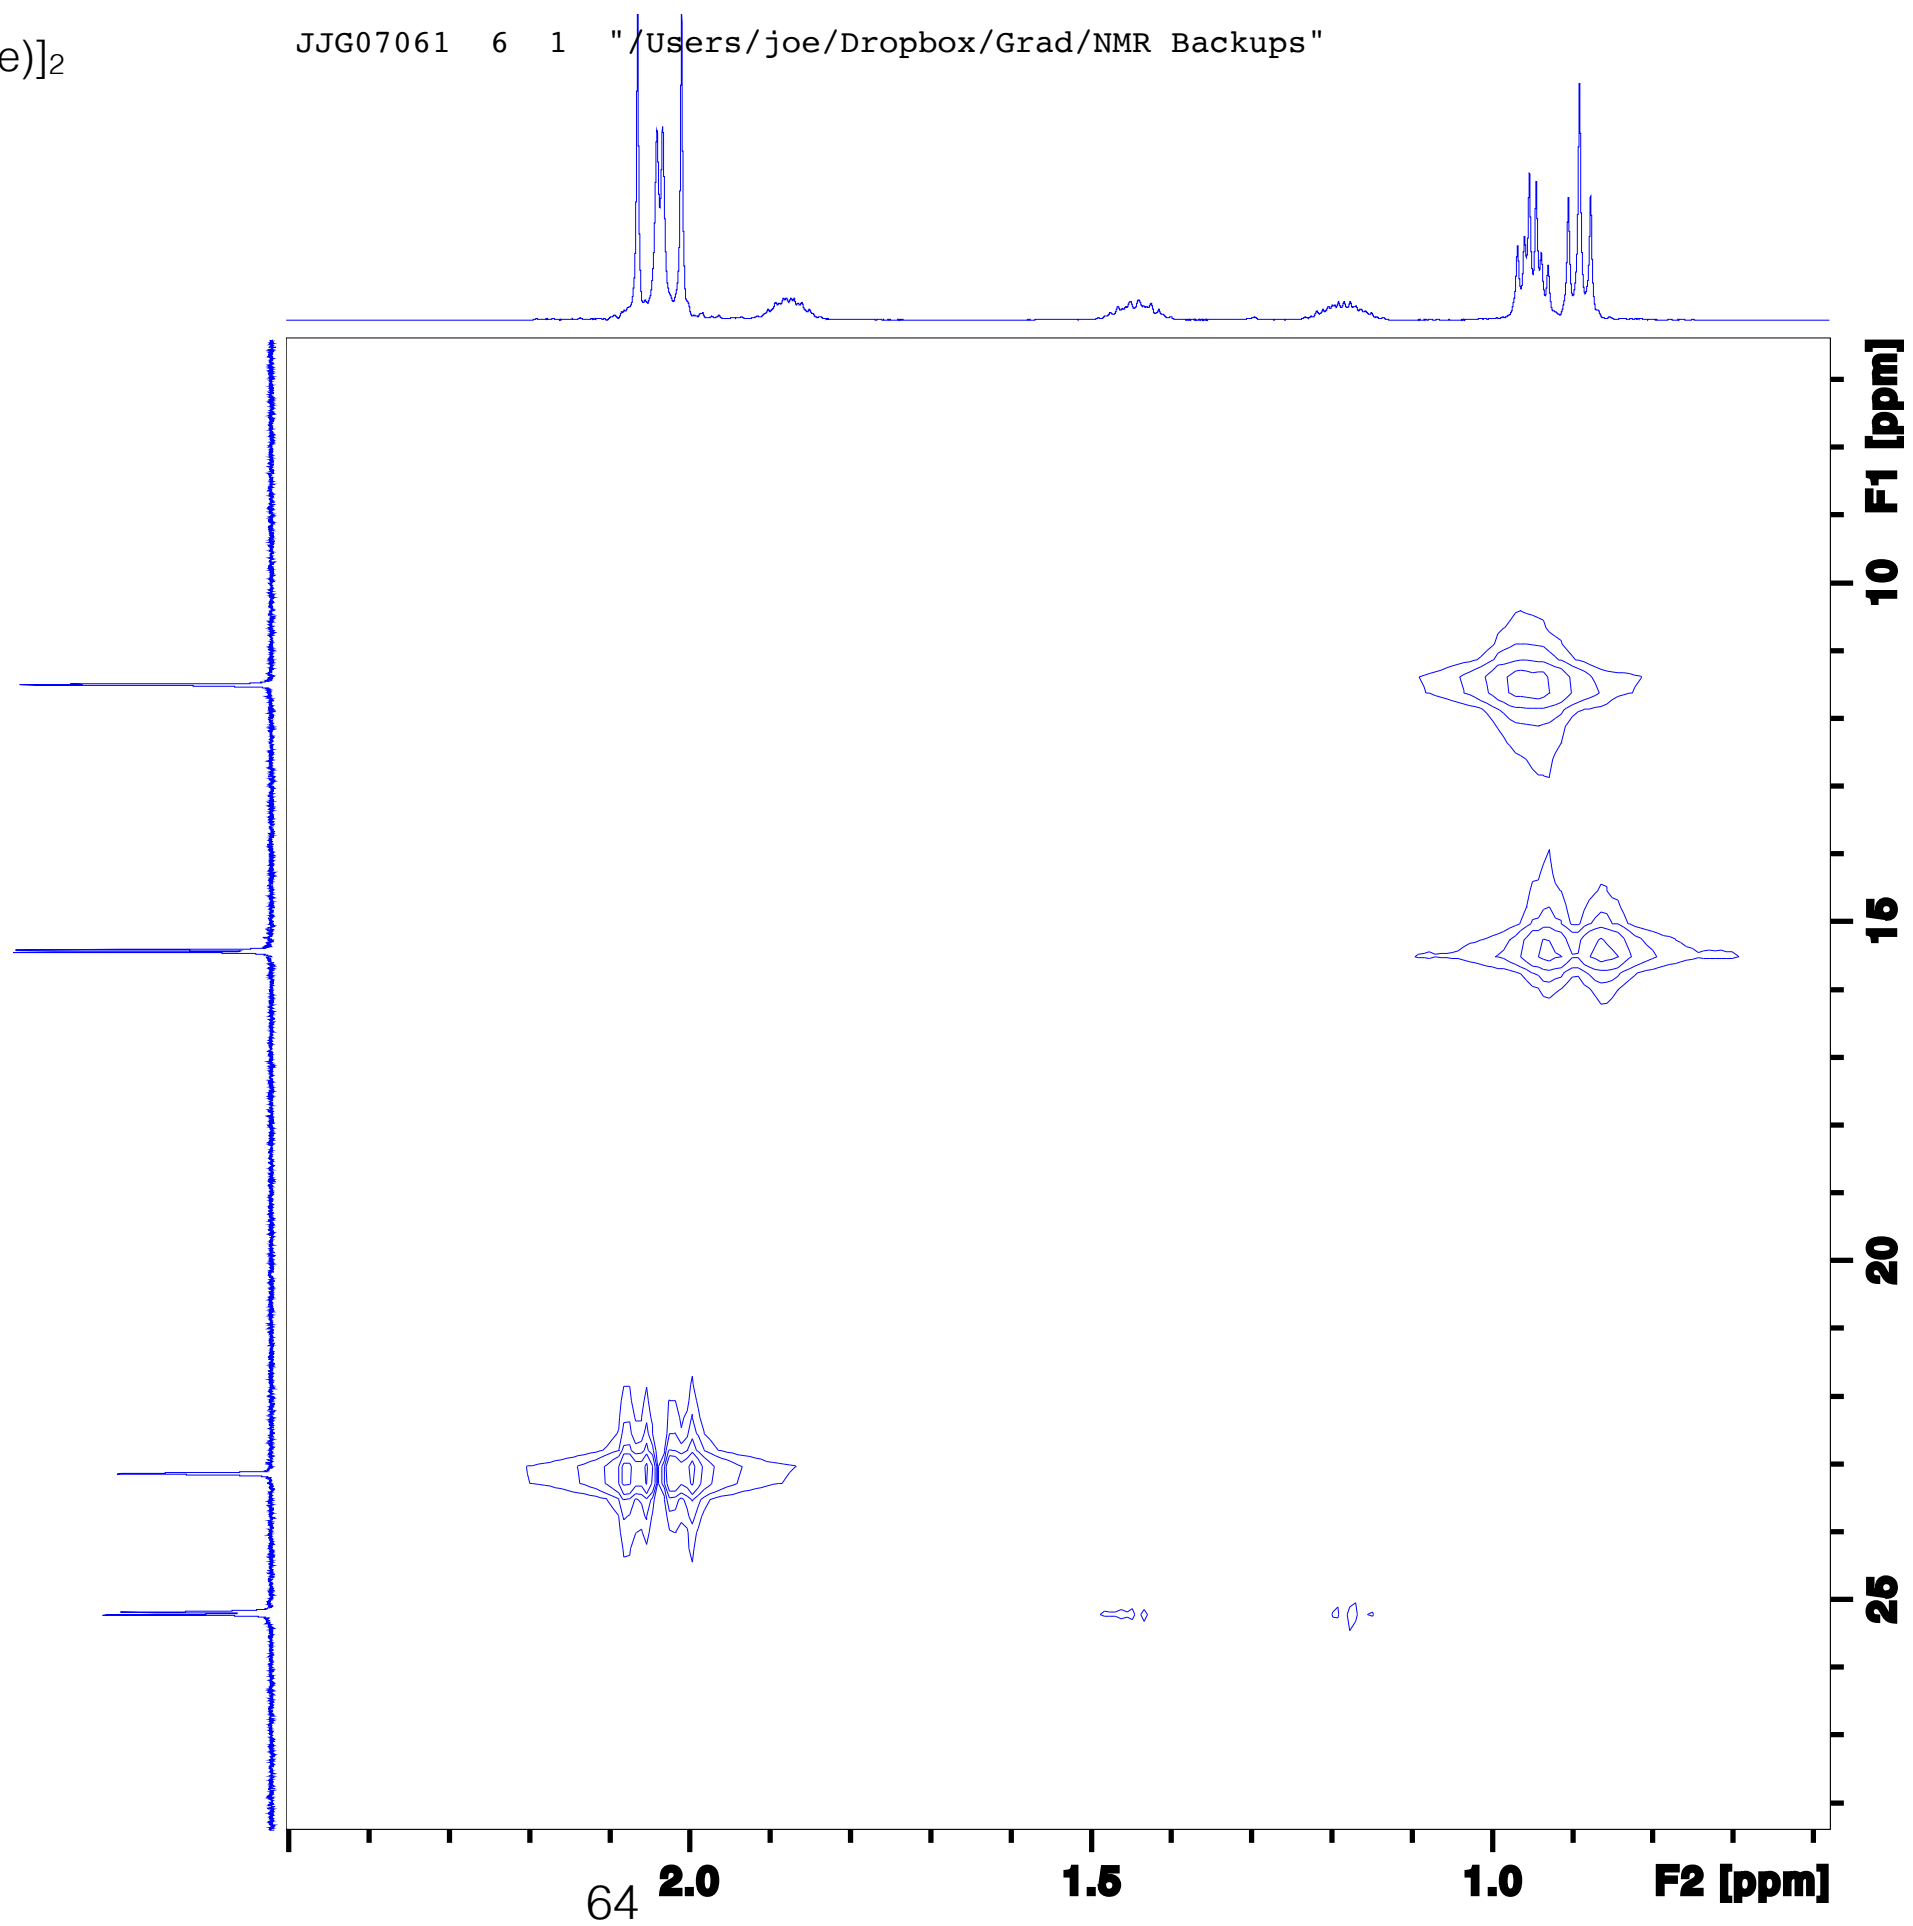

$^{13}\text{C}$  38-73 ppm  
[Pd(o-CF<sub>3</sub>-dmba)(NAC-Ile)]<sub>2</sub>

JJG07019 7 1 "/Users/joe/Dropbox/Grad/NMR Backups"

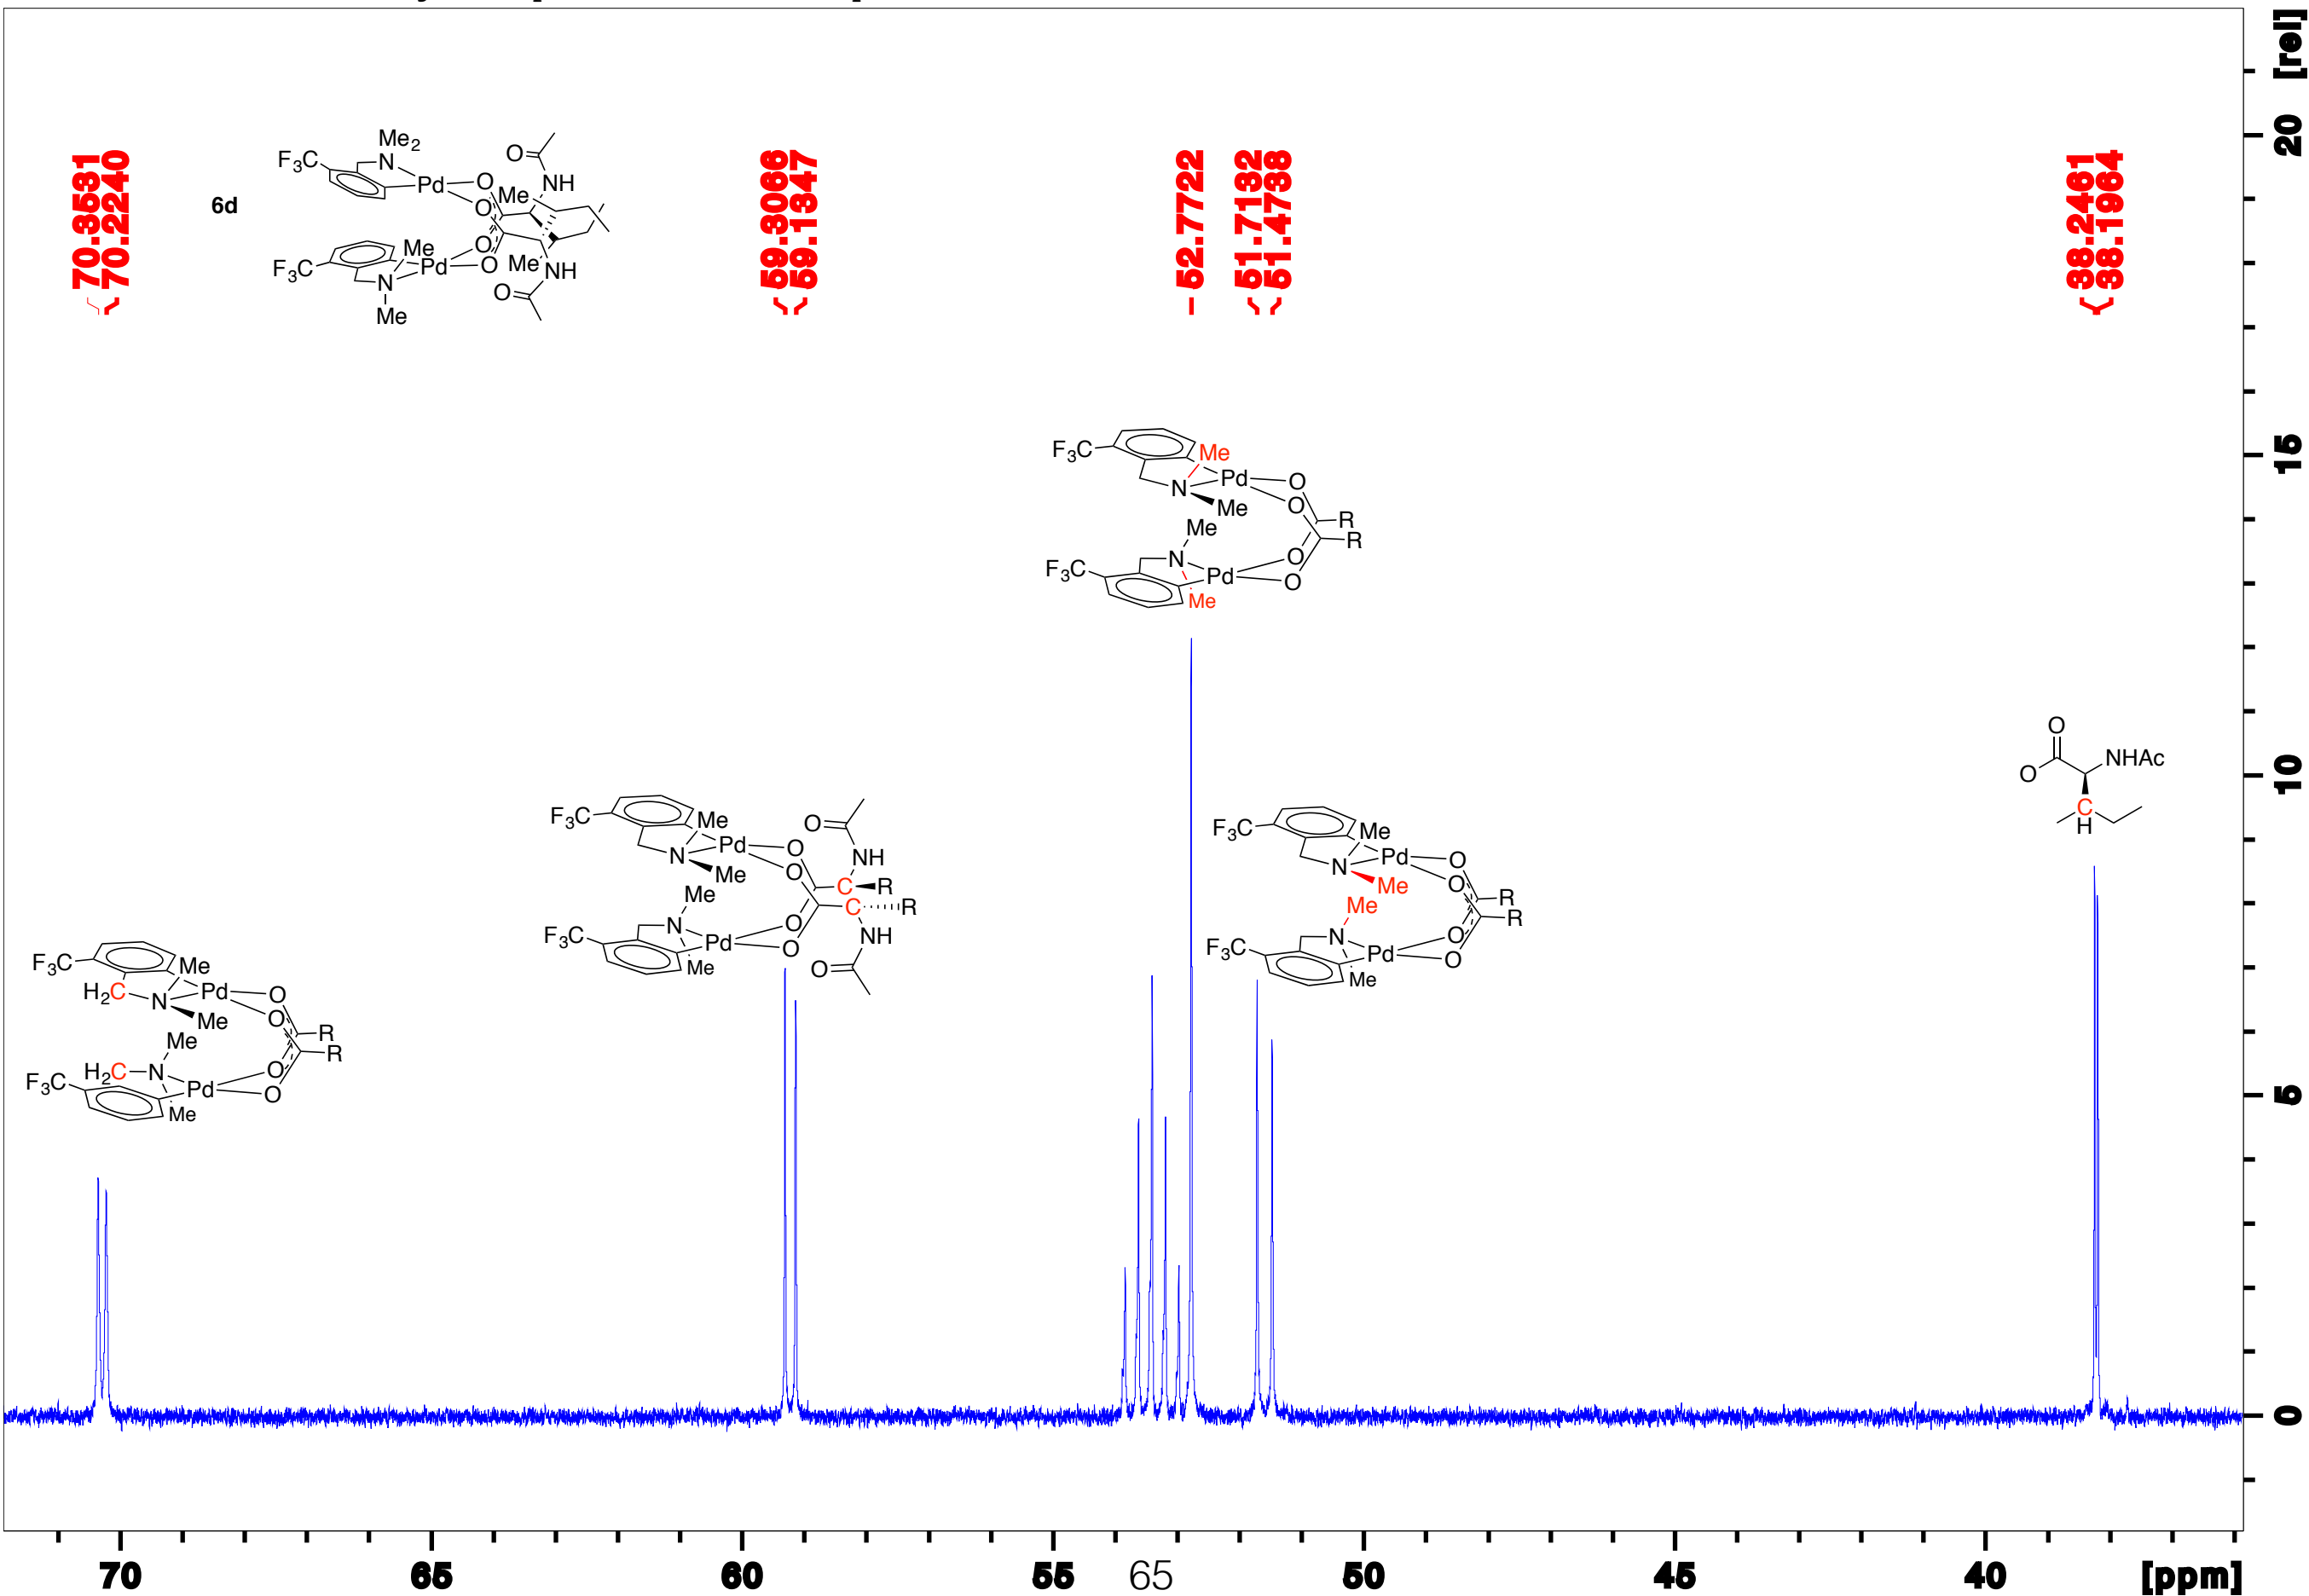

$^{13}\text{C}$  HMQC 38-73 ppm  
[Pd(o-CF<sub>3</sub>-dmba)(NAc-Ile)]<sub>2</sub>

JJG07061 6 1 "/Users/joe/Dropbox/Grad/NMR Backups"

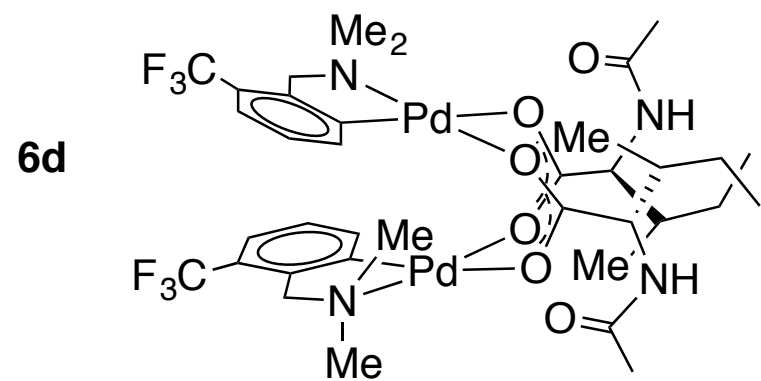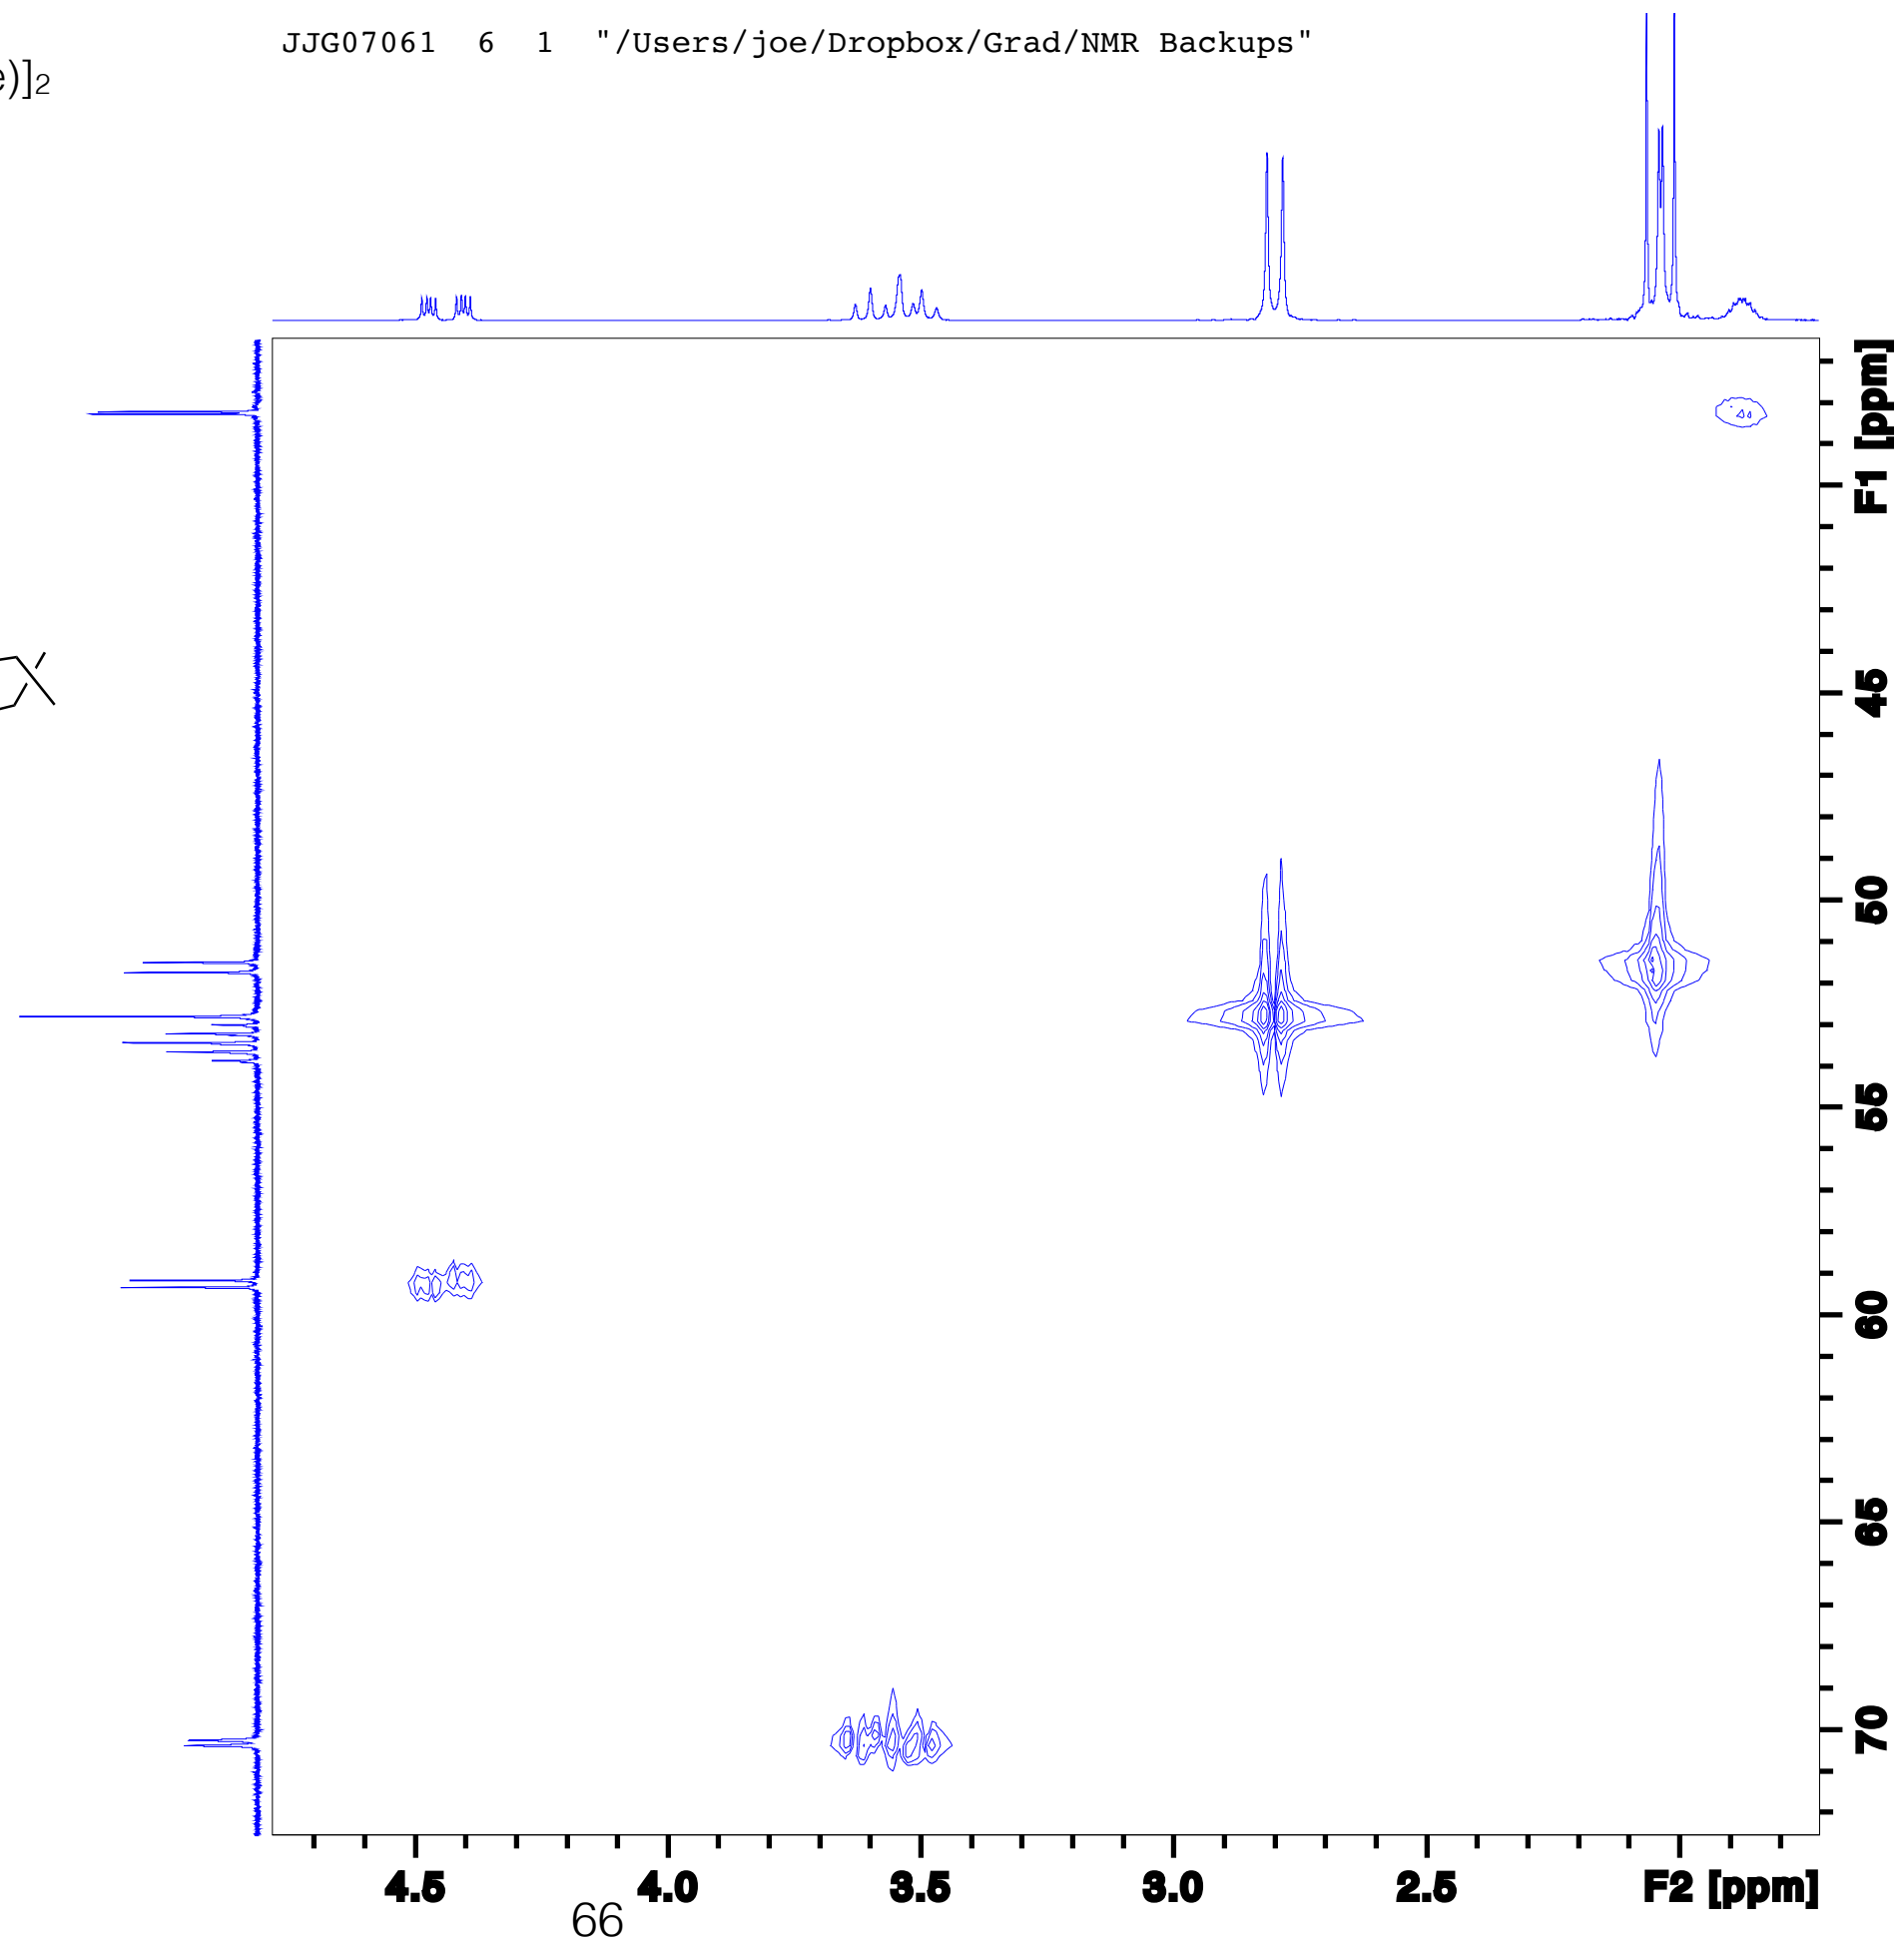

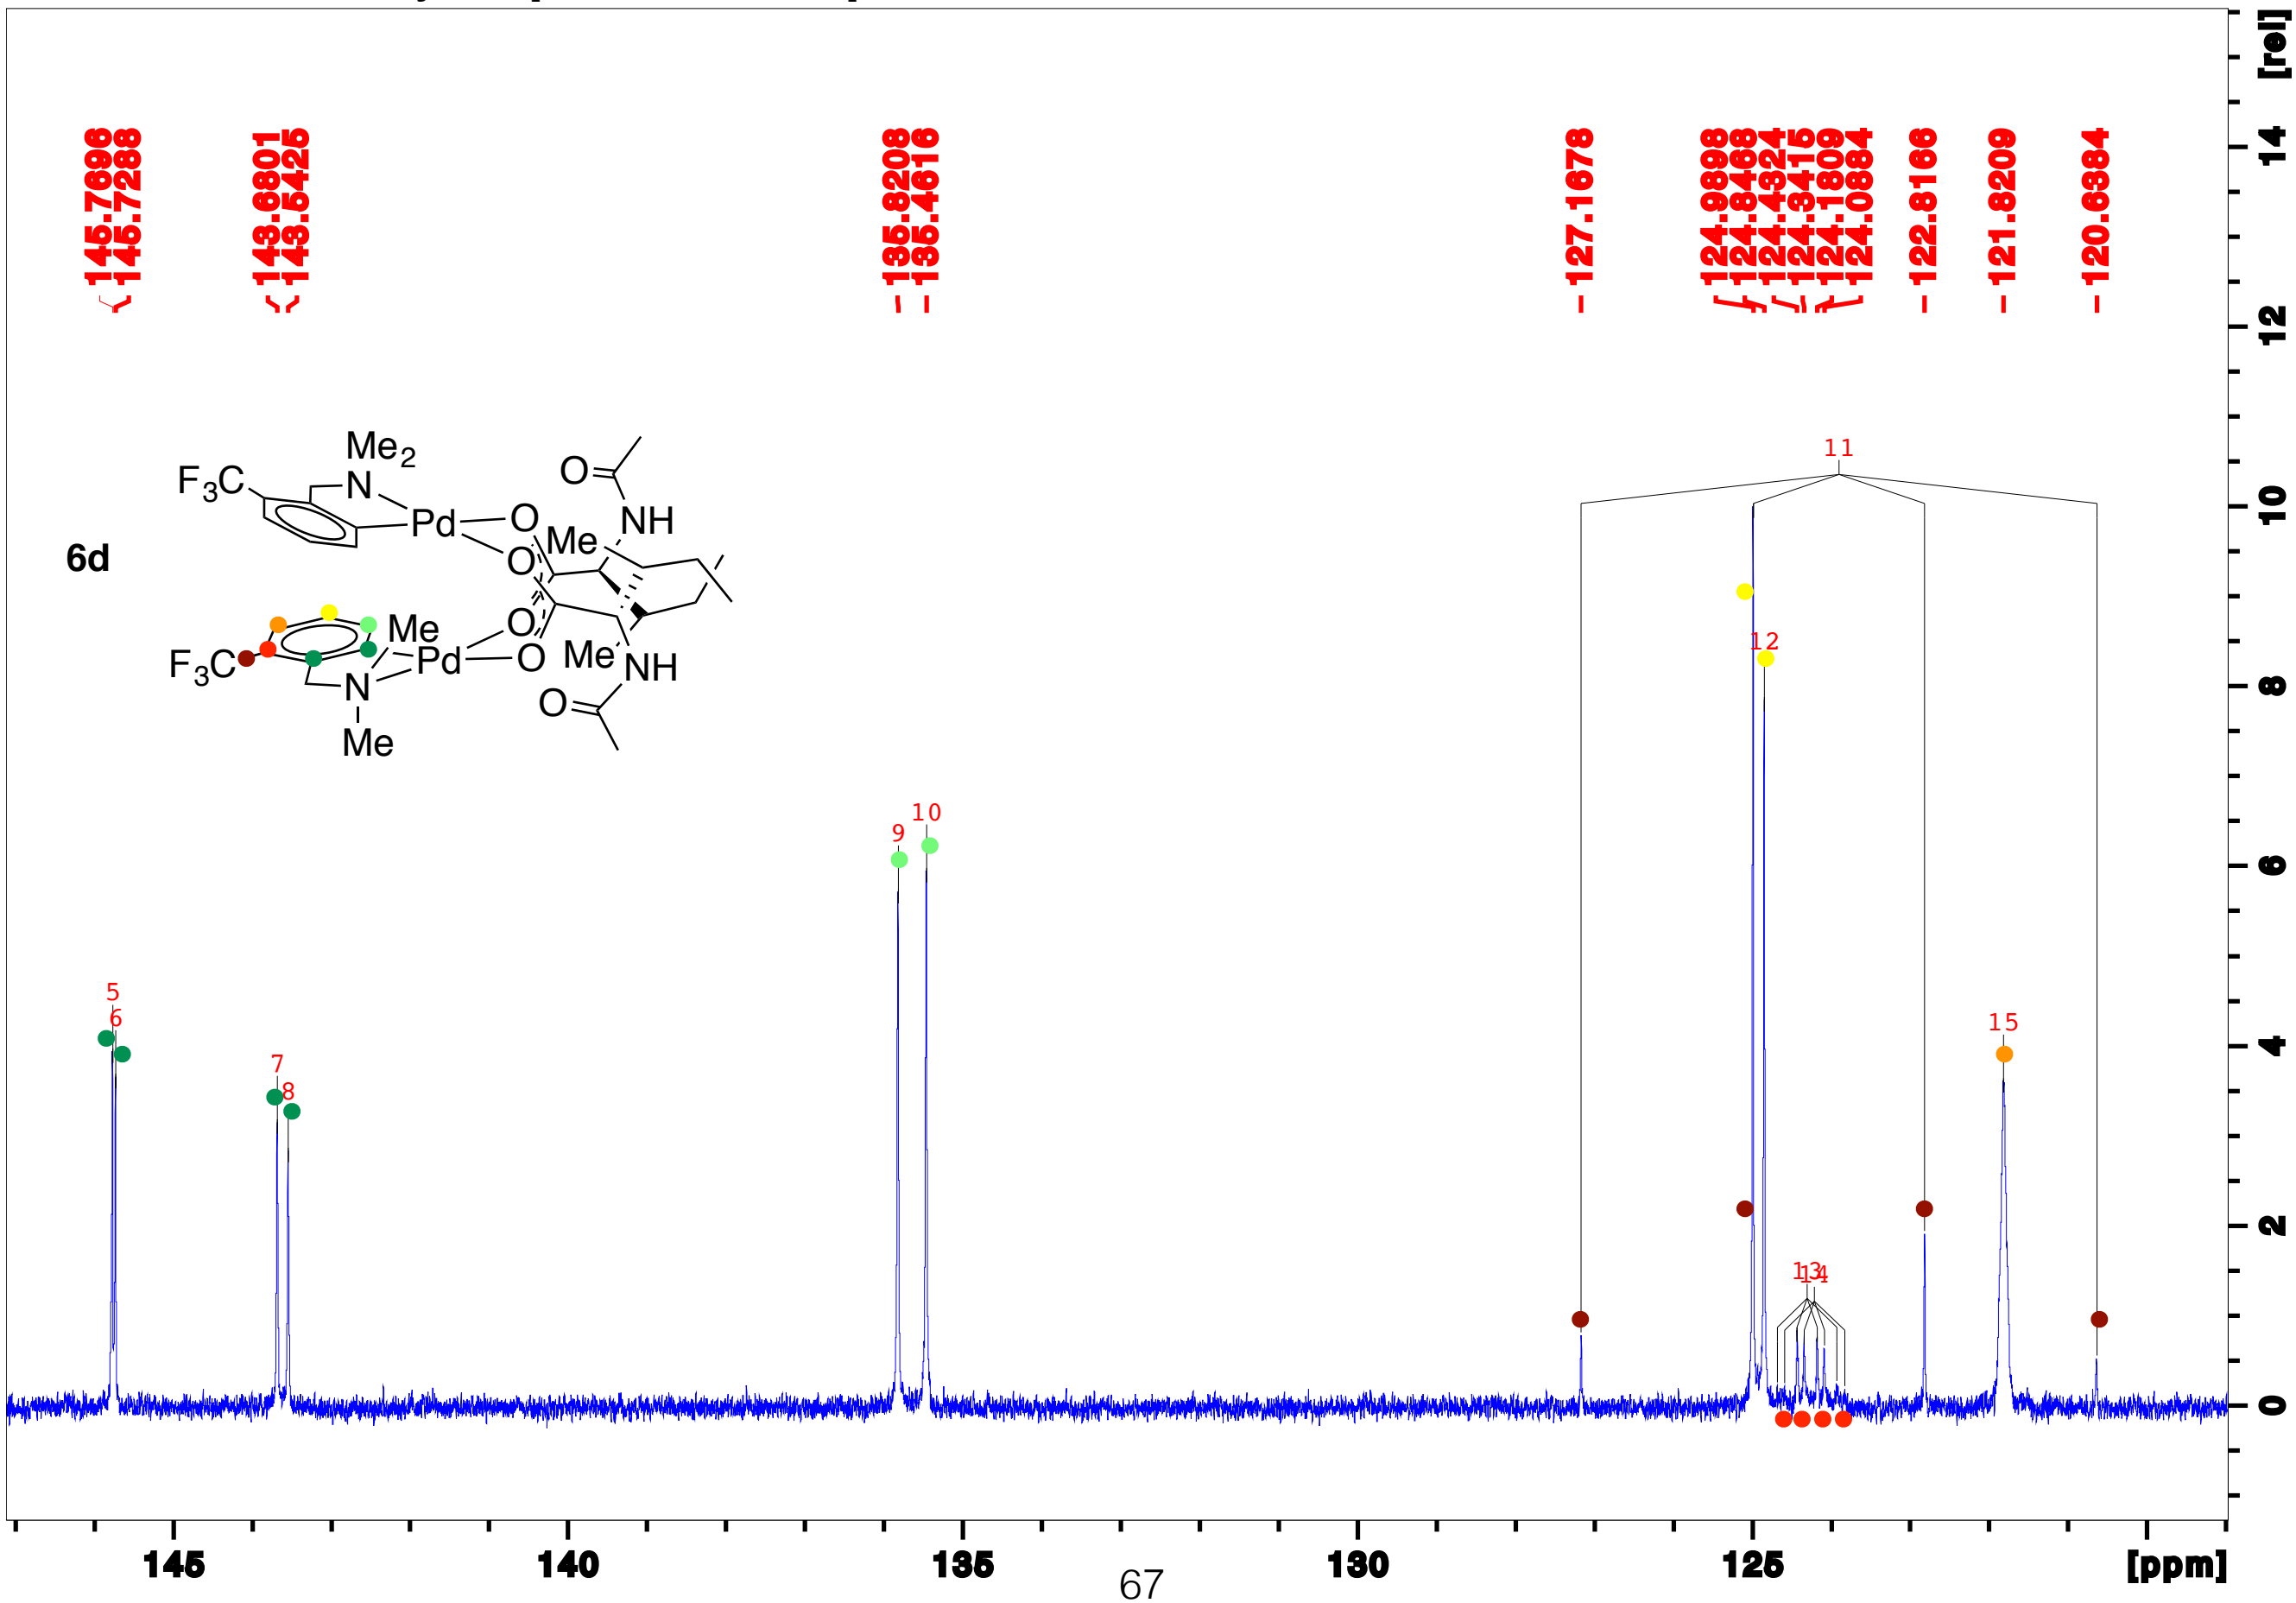

$^{13}\text{C}$  HMQC aromatic region  
[Pd(o-CF<sub>3</sub>-dmba)(NAc-Ile)]<sub>2</sub>

JJG07061 6 1 "/Users/joe/Dropbox/Grad/NMR Backups"

6d

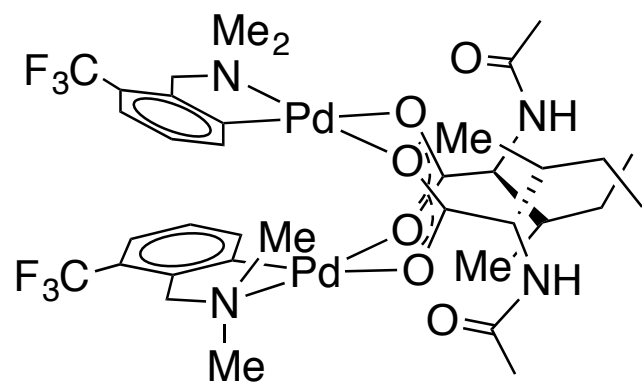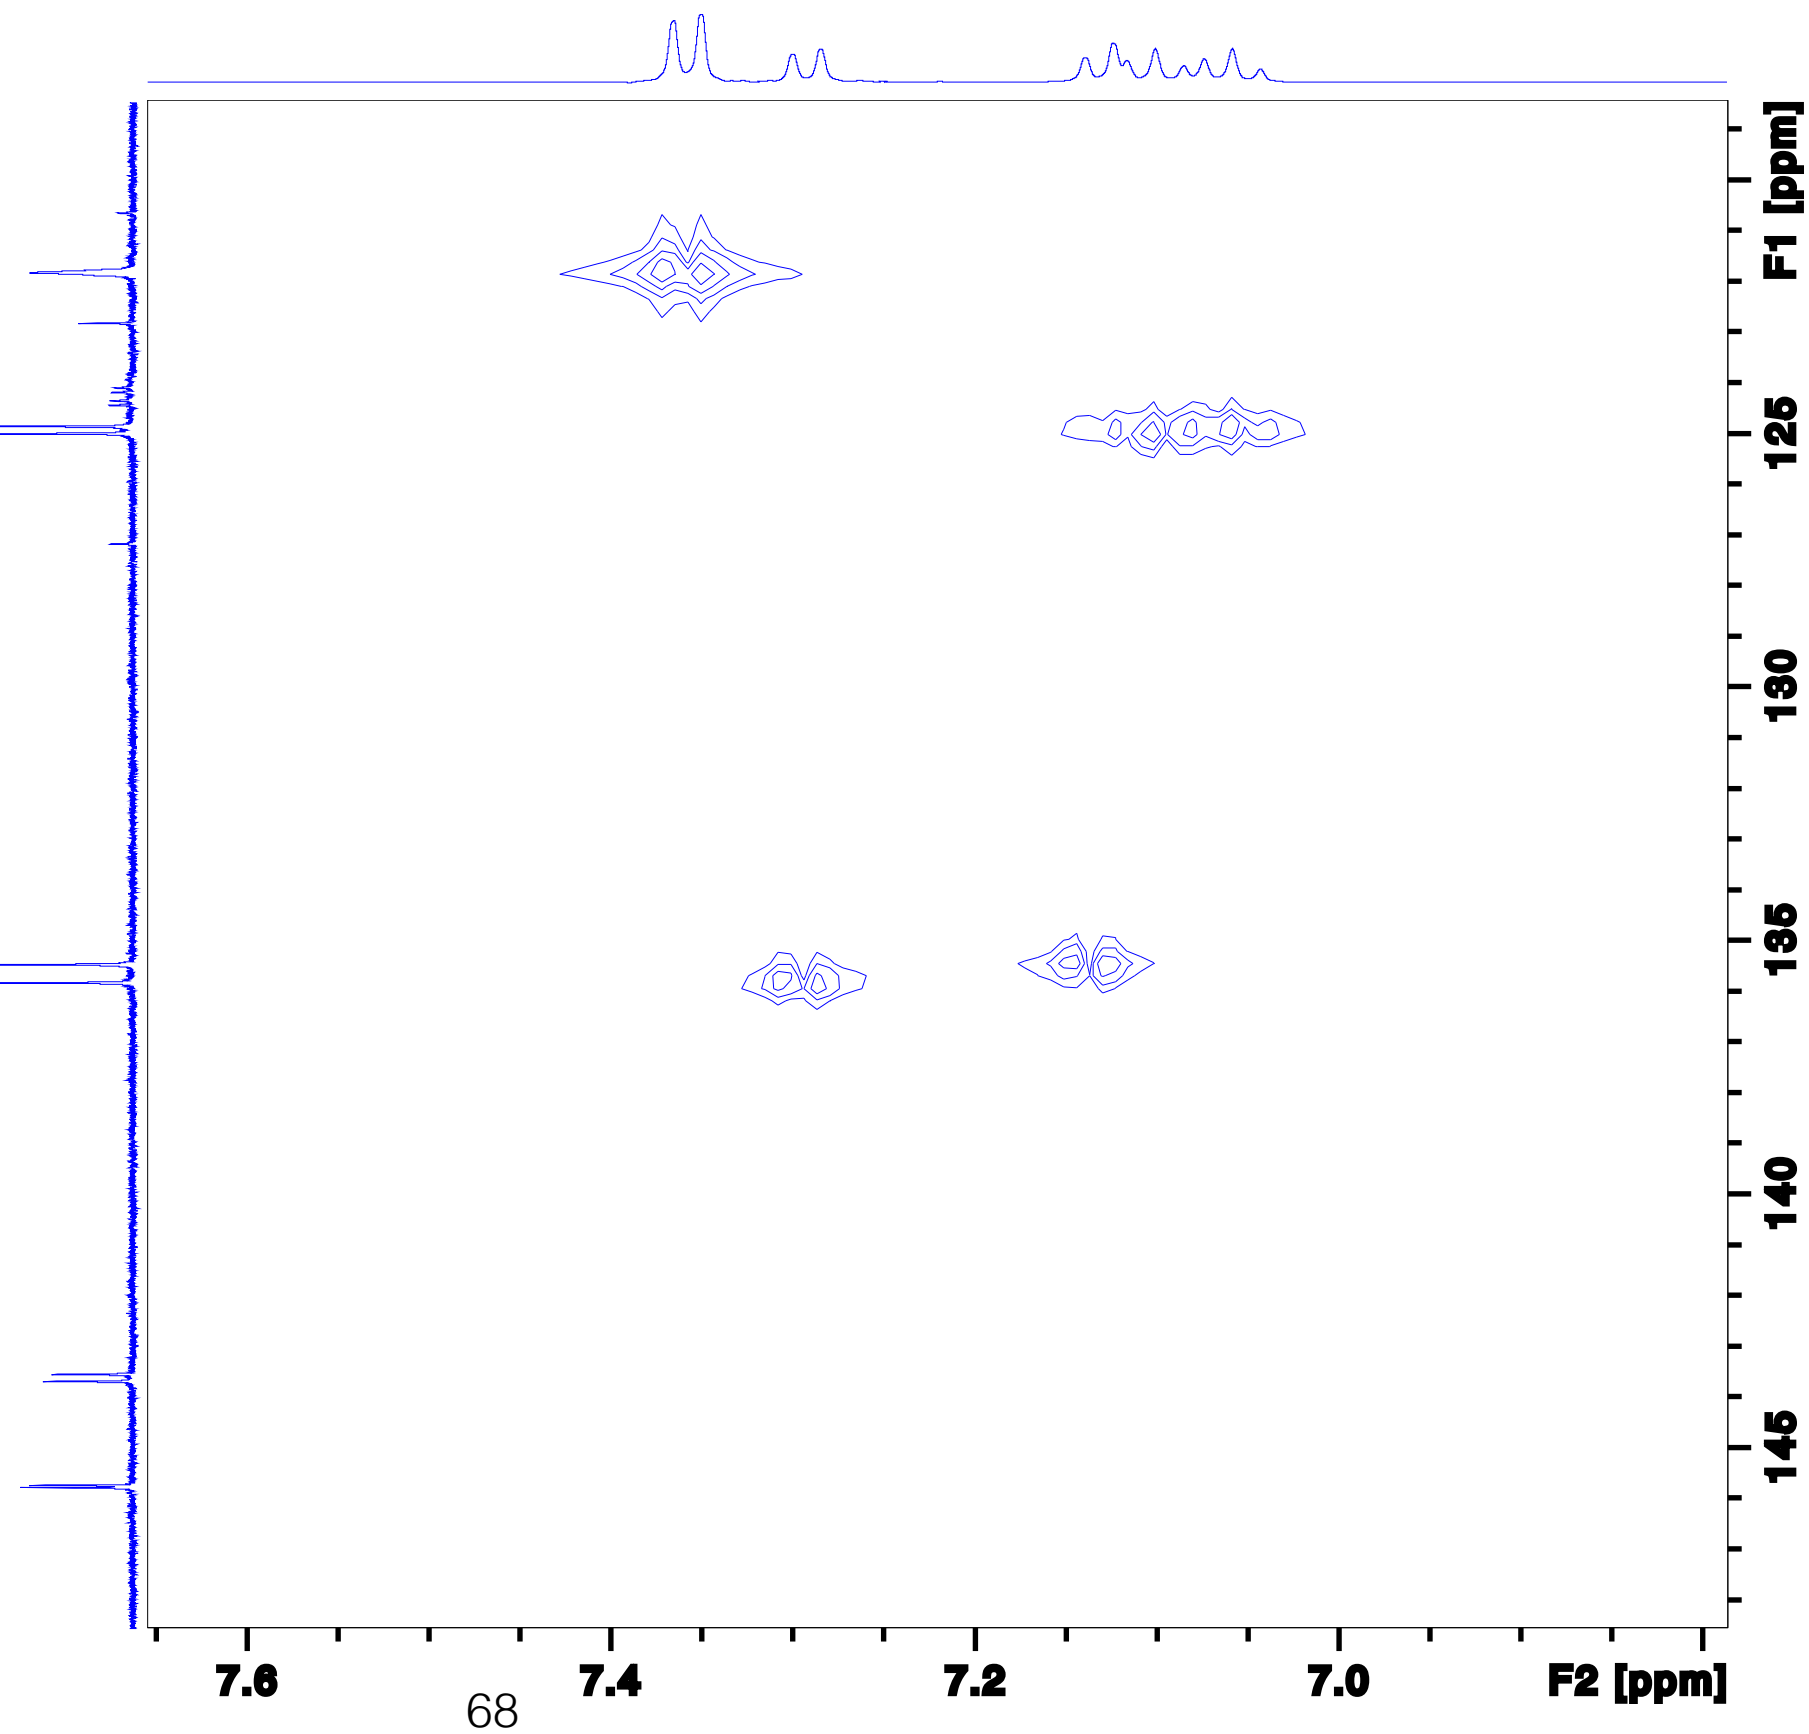



HMQC C-H's ortho to Pd  
[Pd(o-CF<sub>3</sub>-dmba)(NAC-Ile)]<sub>2</sub>

JJG07061 6 1 "/Users/joe/Dropbox/Grad/NMR Backups"

6d

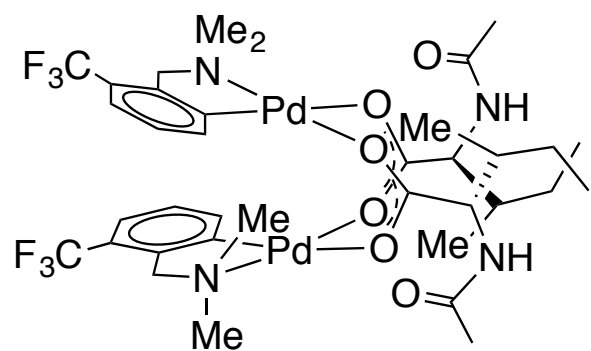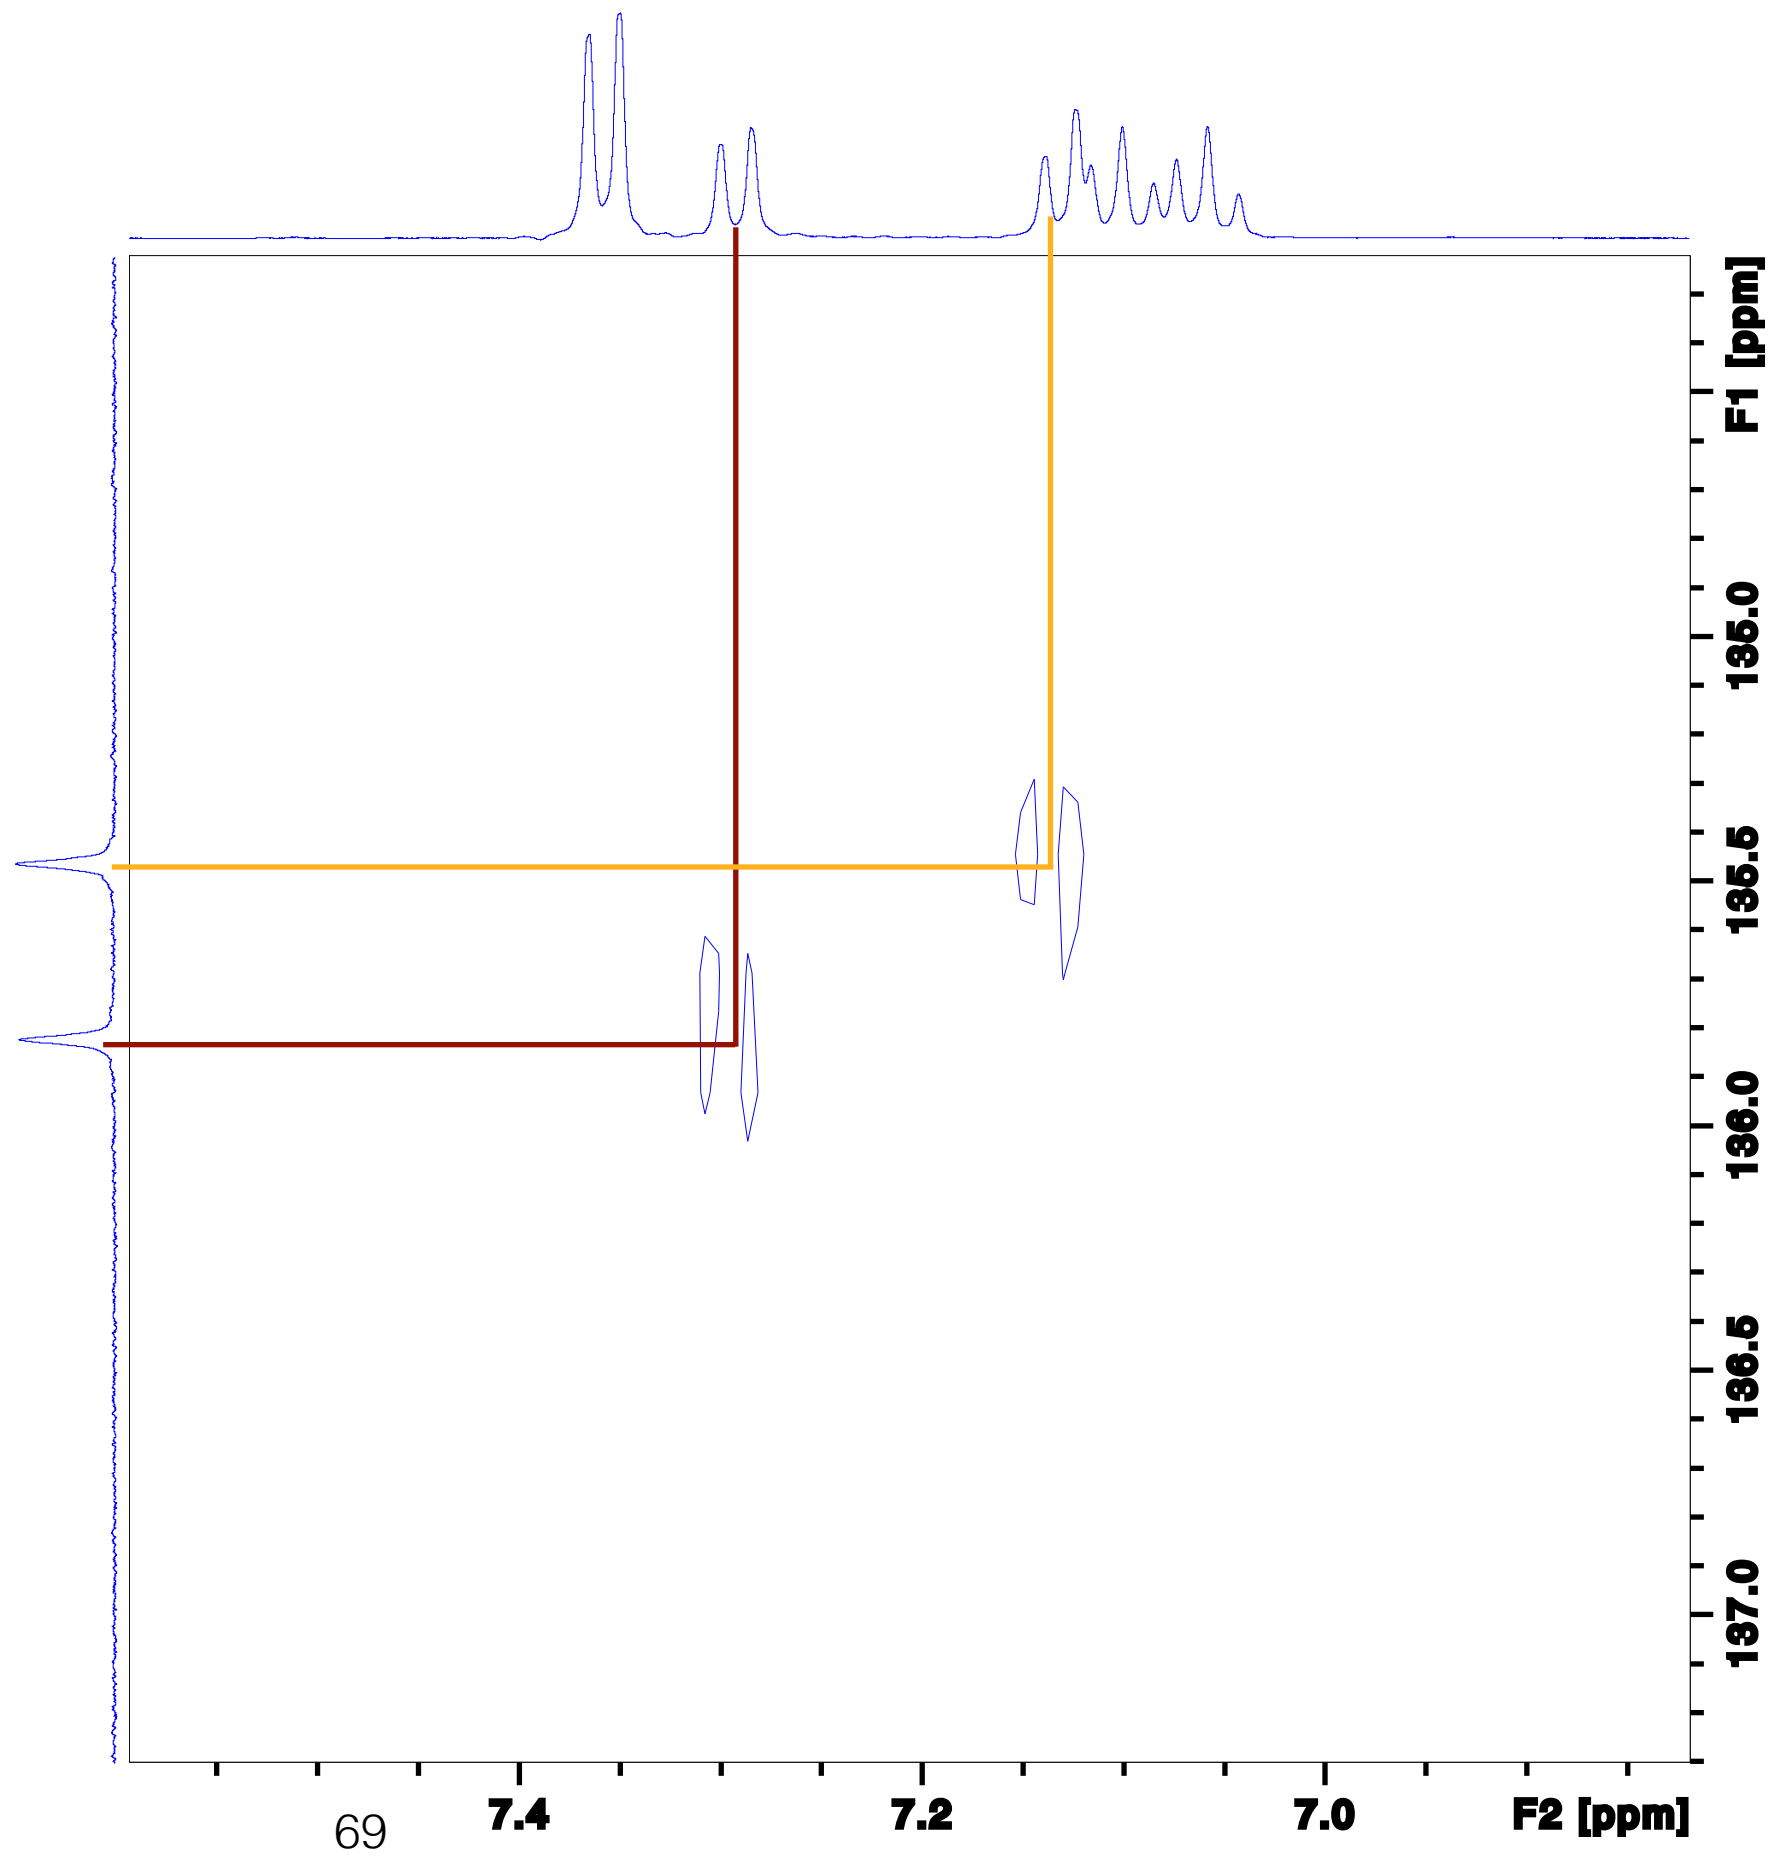

$^{19}\text{F}$  [Pd(o-CF<sub>3</sub>-dmba)(NAc-Ile)]<sub>2</sub>

∨  
-61.923  
-61.976

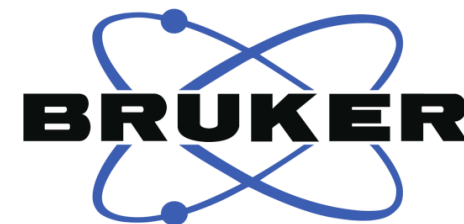

Current Data Parameters  
NAME JYG07019  
EXPNO 6  
PROCNO 1

F2 - Acquisition Parameters  
Date\_ 20160622  
Time 10.37  
INSTRUM spect  
PROBHD 5 mm PABBO BB/  
PULPROG zgflqn  
TD 703112  
SOLVENT CD<sub>2</sub>Cl<sub>2</sub>  
NS 1  
DS 0  
SWH 117187.500 Hz  
FIDRES 0.166670 Hz  
AQ 2.9999444 sec  
RG 189.89  
DW 4.267 usec  
DE 6.50 usec  
TE 296.0 K  
D1 12.00000000 sec  
TD0 1

===== CHANNEL f1 =====  
SFO1 470.3195121 MHz  
NUC1 19F  
P1 15.00 usec  
PLW1 37.79999924 W

F2 - Processing parameters  
SI 262144  
SF 470.3477328 MHz  
WDW no  
SSB 0  
LB 0 Hz  
GB 0  
PC 1.00

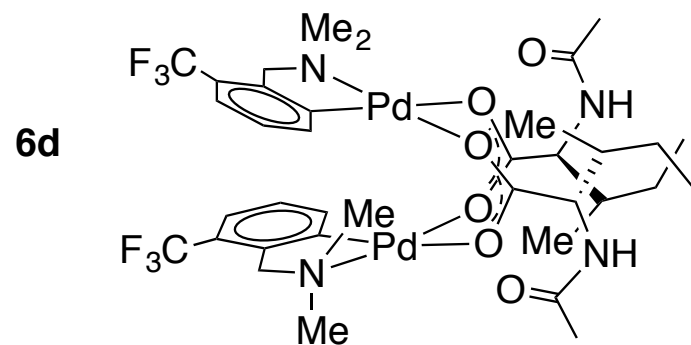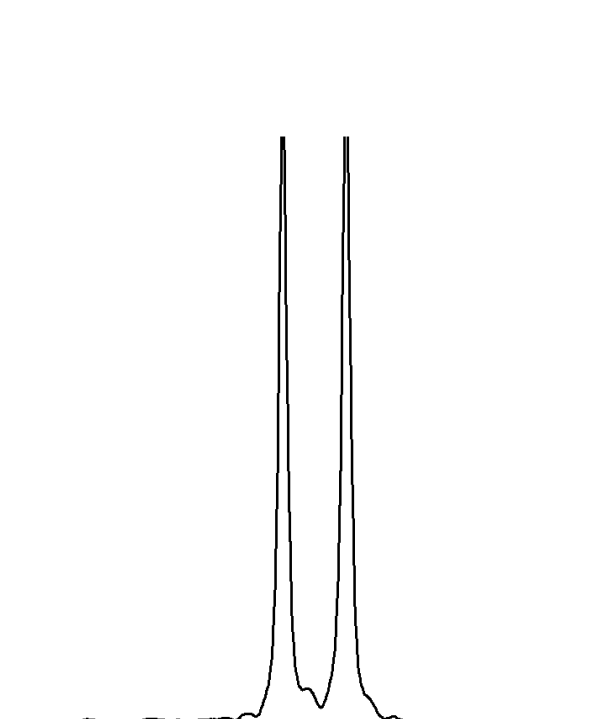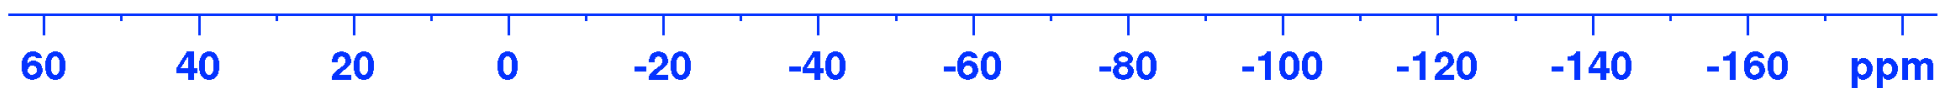

<sup>1</sup>H [Pd(o-CF<sub>3</sub>-dmba)(OAc)]<sub>2</sub>

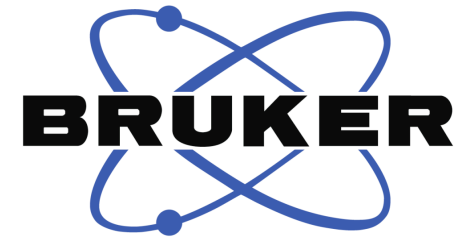

Current Data Parameters  
NAME JYG09042  
EXPNO 1  
PROCNO 1

F2 - Acquisition Parameter  
Date\_ 20161208  
Time 5.43  
INSTRUM spect  
PROBHD 5 mm PABBO BB/  
PULPROG zg  
TD 59998  
SOLVENT CD2Cl2  
NS 1  
DS 0  
SWH 10000.000 Hz  
FIDRES 0.166672 Hz  
AQ 2.9999001 sec  
RG 29.95  
DW 50.000 usec  
DE 6.50 usec  
TE 297.0 K  
D1 30.00000000 sec  
TD0 1

===== CHANNEL f1 =====  
SFO1 499.8730869 MHz  
NUC1 1H  
P1 10.75 usec  
PLW1 18.25000000 W

F2 - Processing parameters  
SI 65536  
SF 499.8700000 MHz  
WDW no  
SSB 0  
LB 0 Hz  
GB 0  
PC 1.00

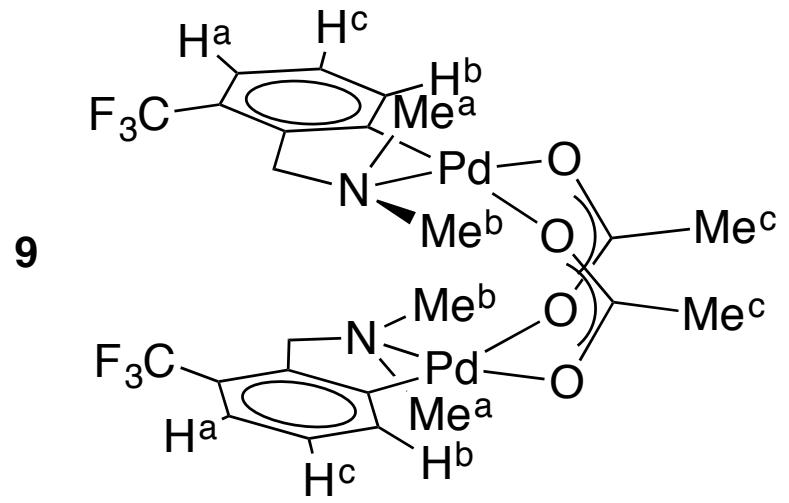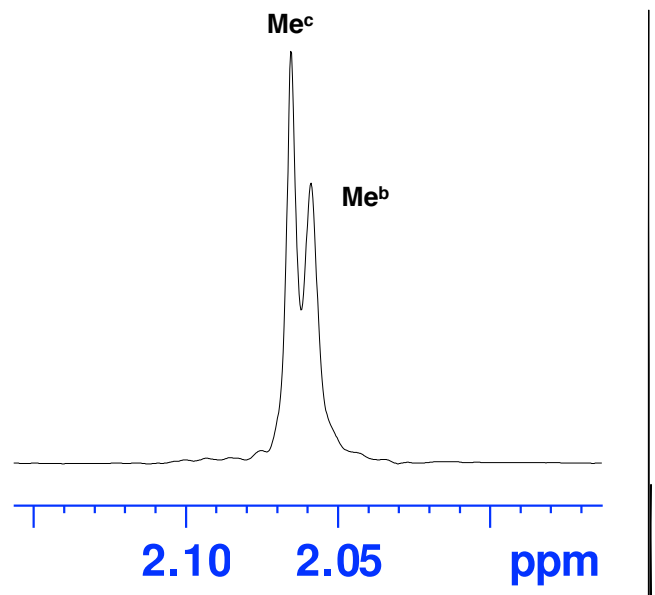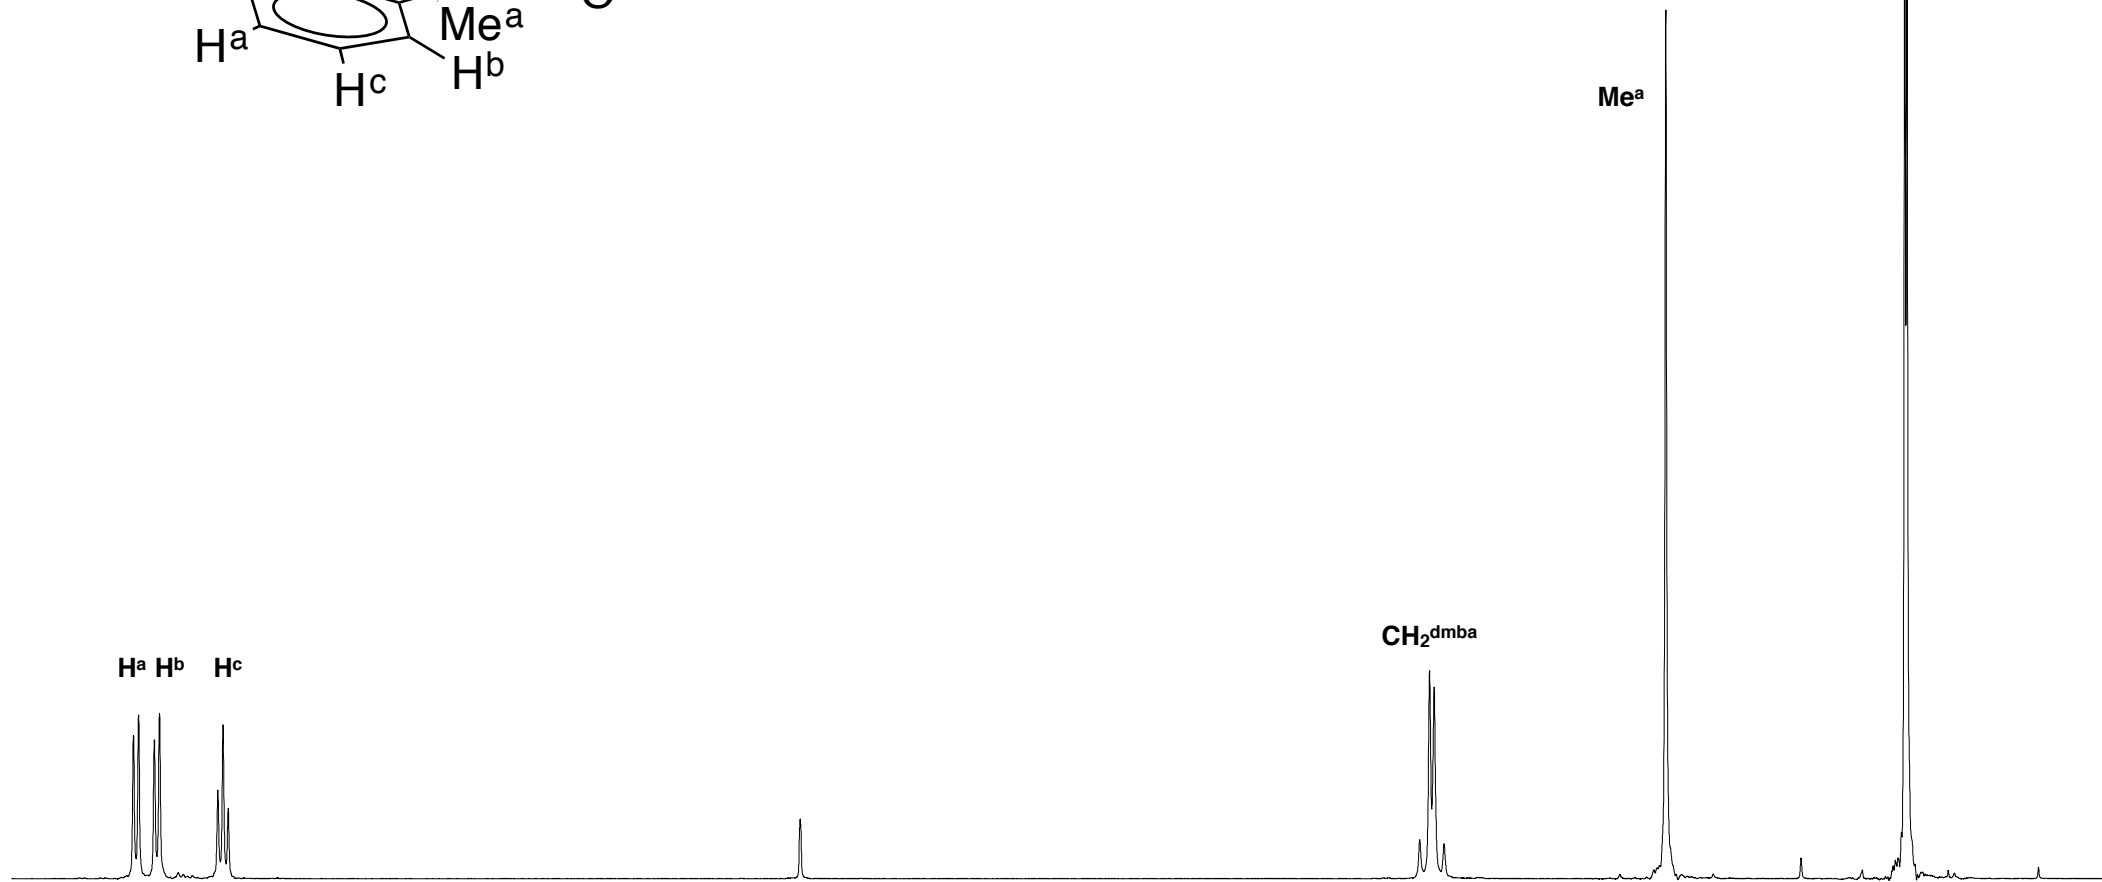

7.5 7.0 6.5 6.0 5.5 5.0 4.5 4.0 3.5 3.0 2.5 2.0 ppm

2.02 2.06 2.03 4.02 6.00 12.02

71

$^{19}\text{F}$  [Pd(o-CF<sub>3</sub>-dmba)(OAc)]<sub>2</sub>

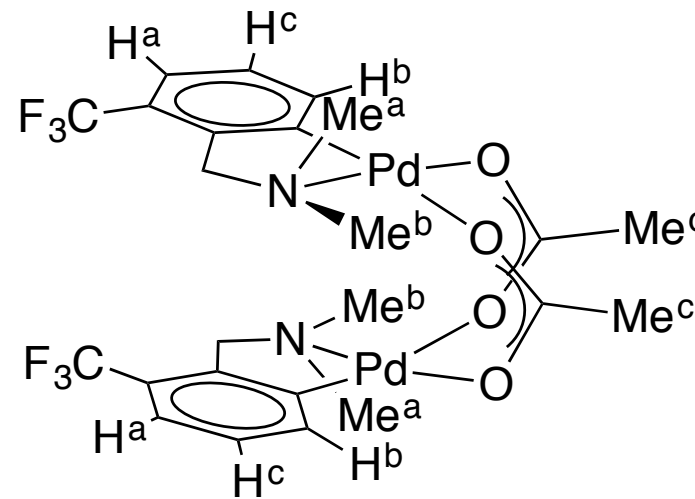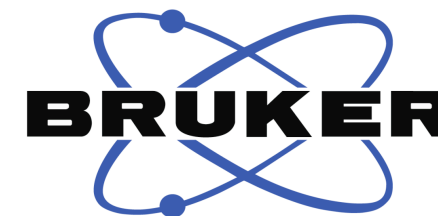

Current Data Parameters  
NAME JYG09042  
EXPNO 6  
PROCNO 1

F2 - Acquisition Parameter  
Date\_ 20161208  
Time 6.42  
INSTRUM spect  
PROBHD 5 mm PABBO BB/  
PULPROG zgflqg  
TD 281244  
SOLVENT CD2Cl2  
NS 1  
DS 0  
SWH 46875.000 Hz  
FIDRES 0.166670 Hz  
AQ 2.9999361 sec  
RG 310.79  
DW 10.667 usec  
DE 6.50 usec  
TE 297.7 K  
D1 3.00000000 sec  
TD0 1

==== CHANNEL f1 =====  
SF01 470.3176307 MHz  
NUC1 19F  
P1 15.00 usec  
PLW1 37.79999924 W

F2 - Processing parameters  
SI 262144  
SF 470.3477328 MHz  
WDW no  
SSB 0  
LB 0 Hz  
GB 0  
PC 1.00

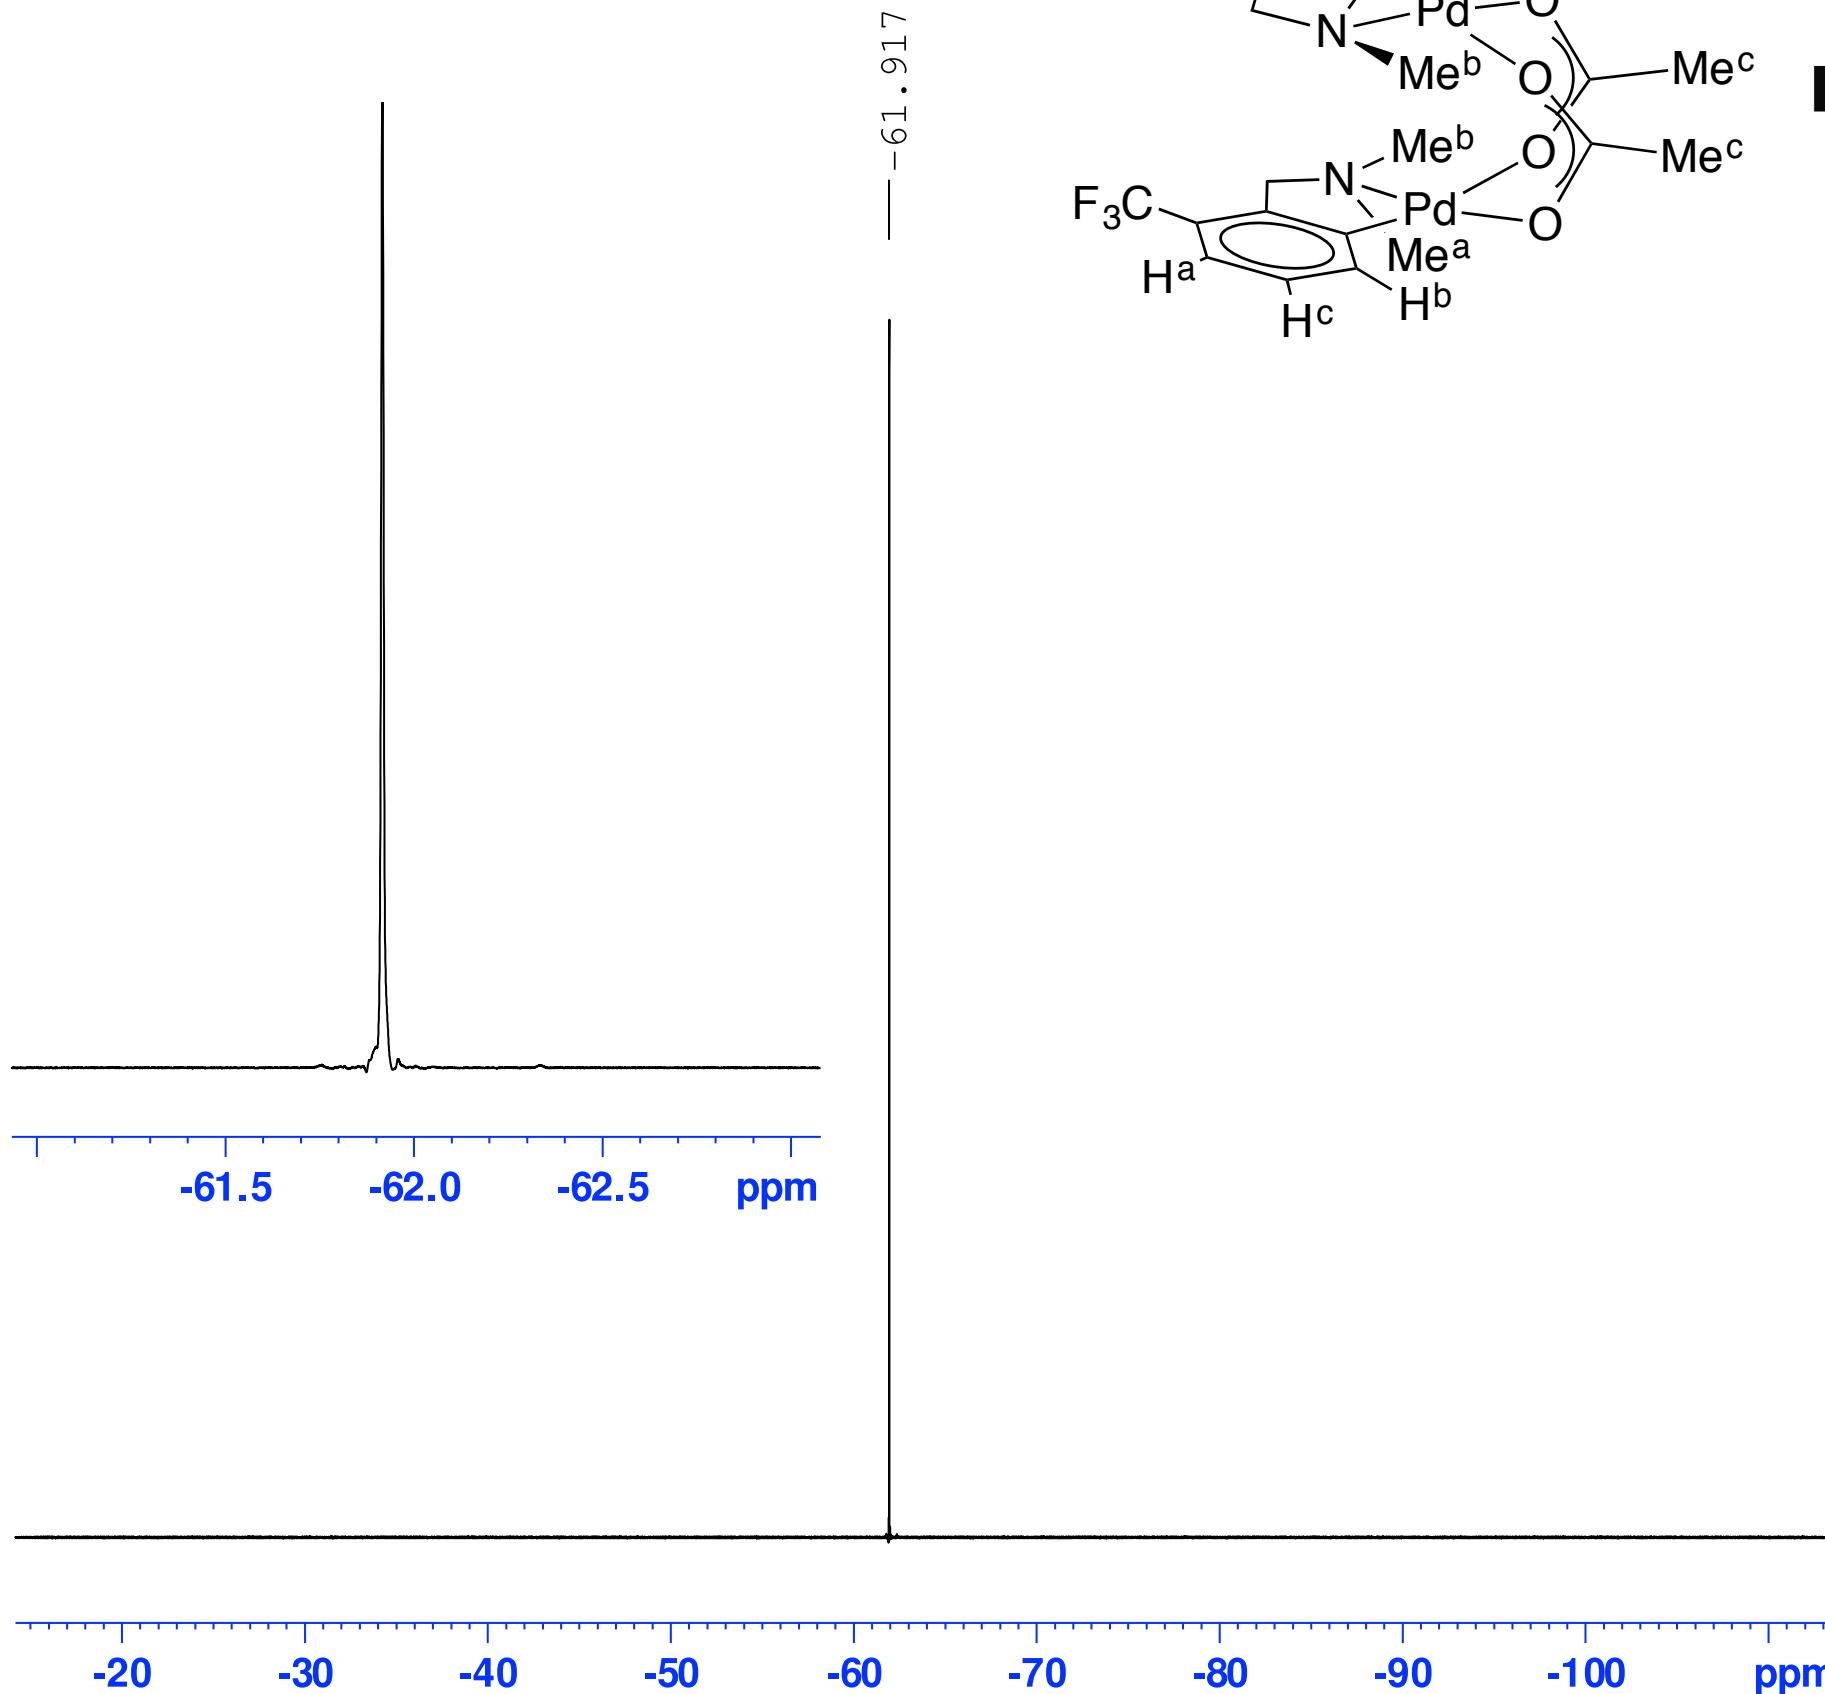

$^{13}\text{C}\{^1\text{H}\}$  [Pd(*o*-CF<sub>3</sub>-dmba)(OAc)]<sub>2</sub>

JJG09042 2 1 "/Users/joe/Dropbox/Grad/NMR Backups"

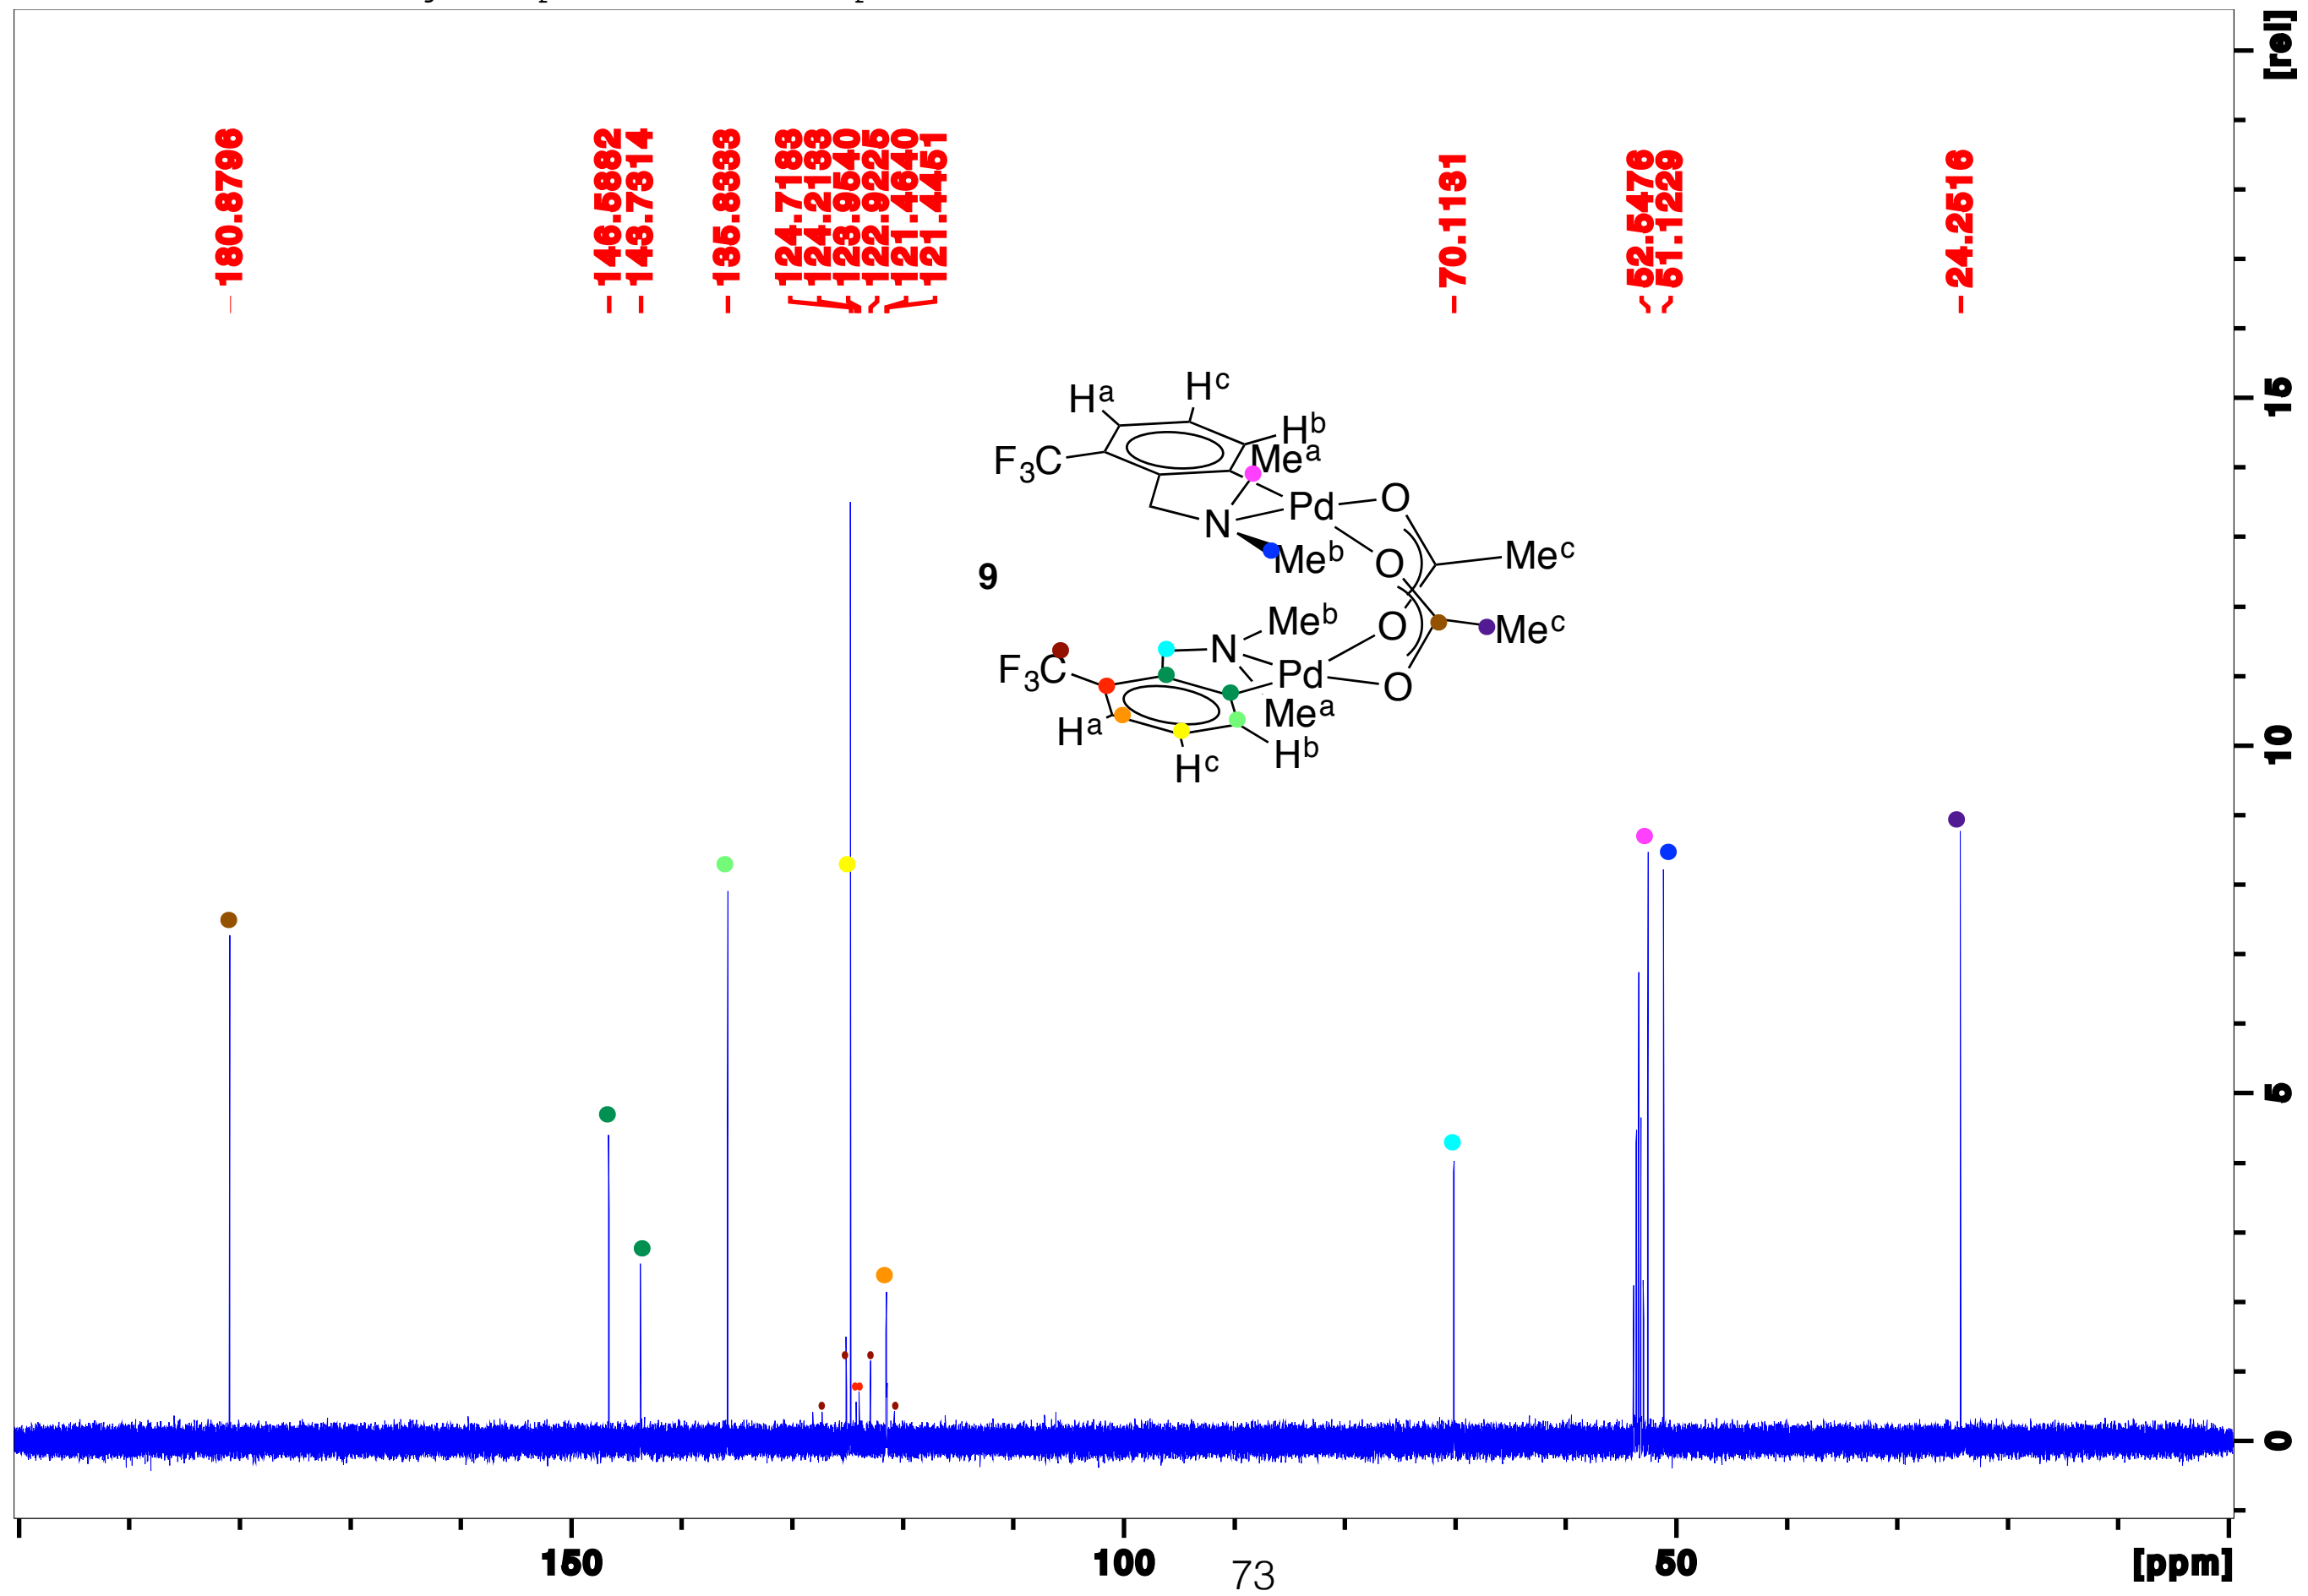

$^{13}\text{C}\{^1\text{H}\}$  [Pd(*o*-CF<sub>3</sub>-dmba)(OAc)]<sub>2</sub> : overlaid with DEPT 135

JJG09042 3 1 "/Users/joe/Dropbox/Grad/NMR Backups"

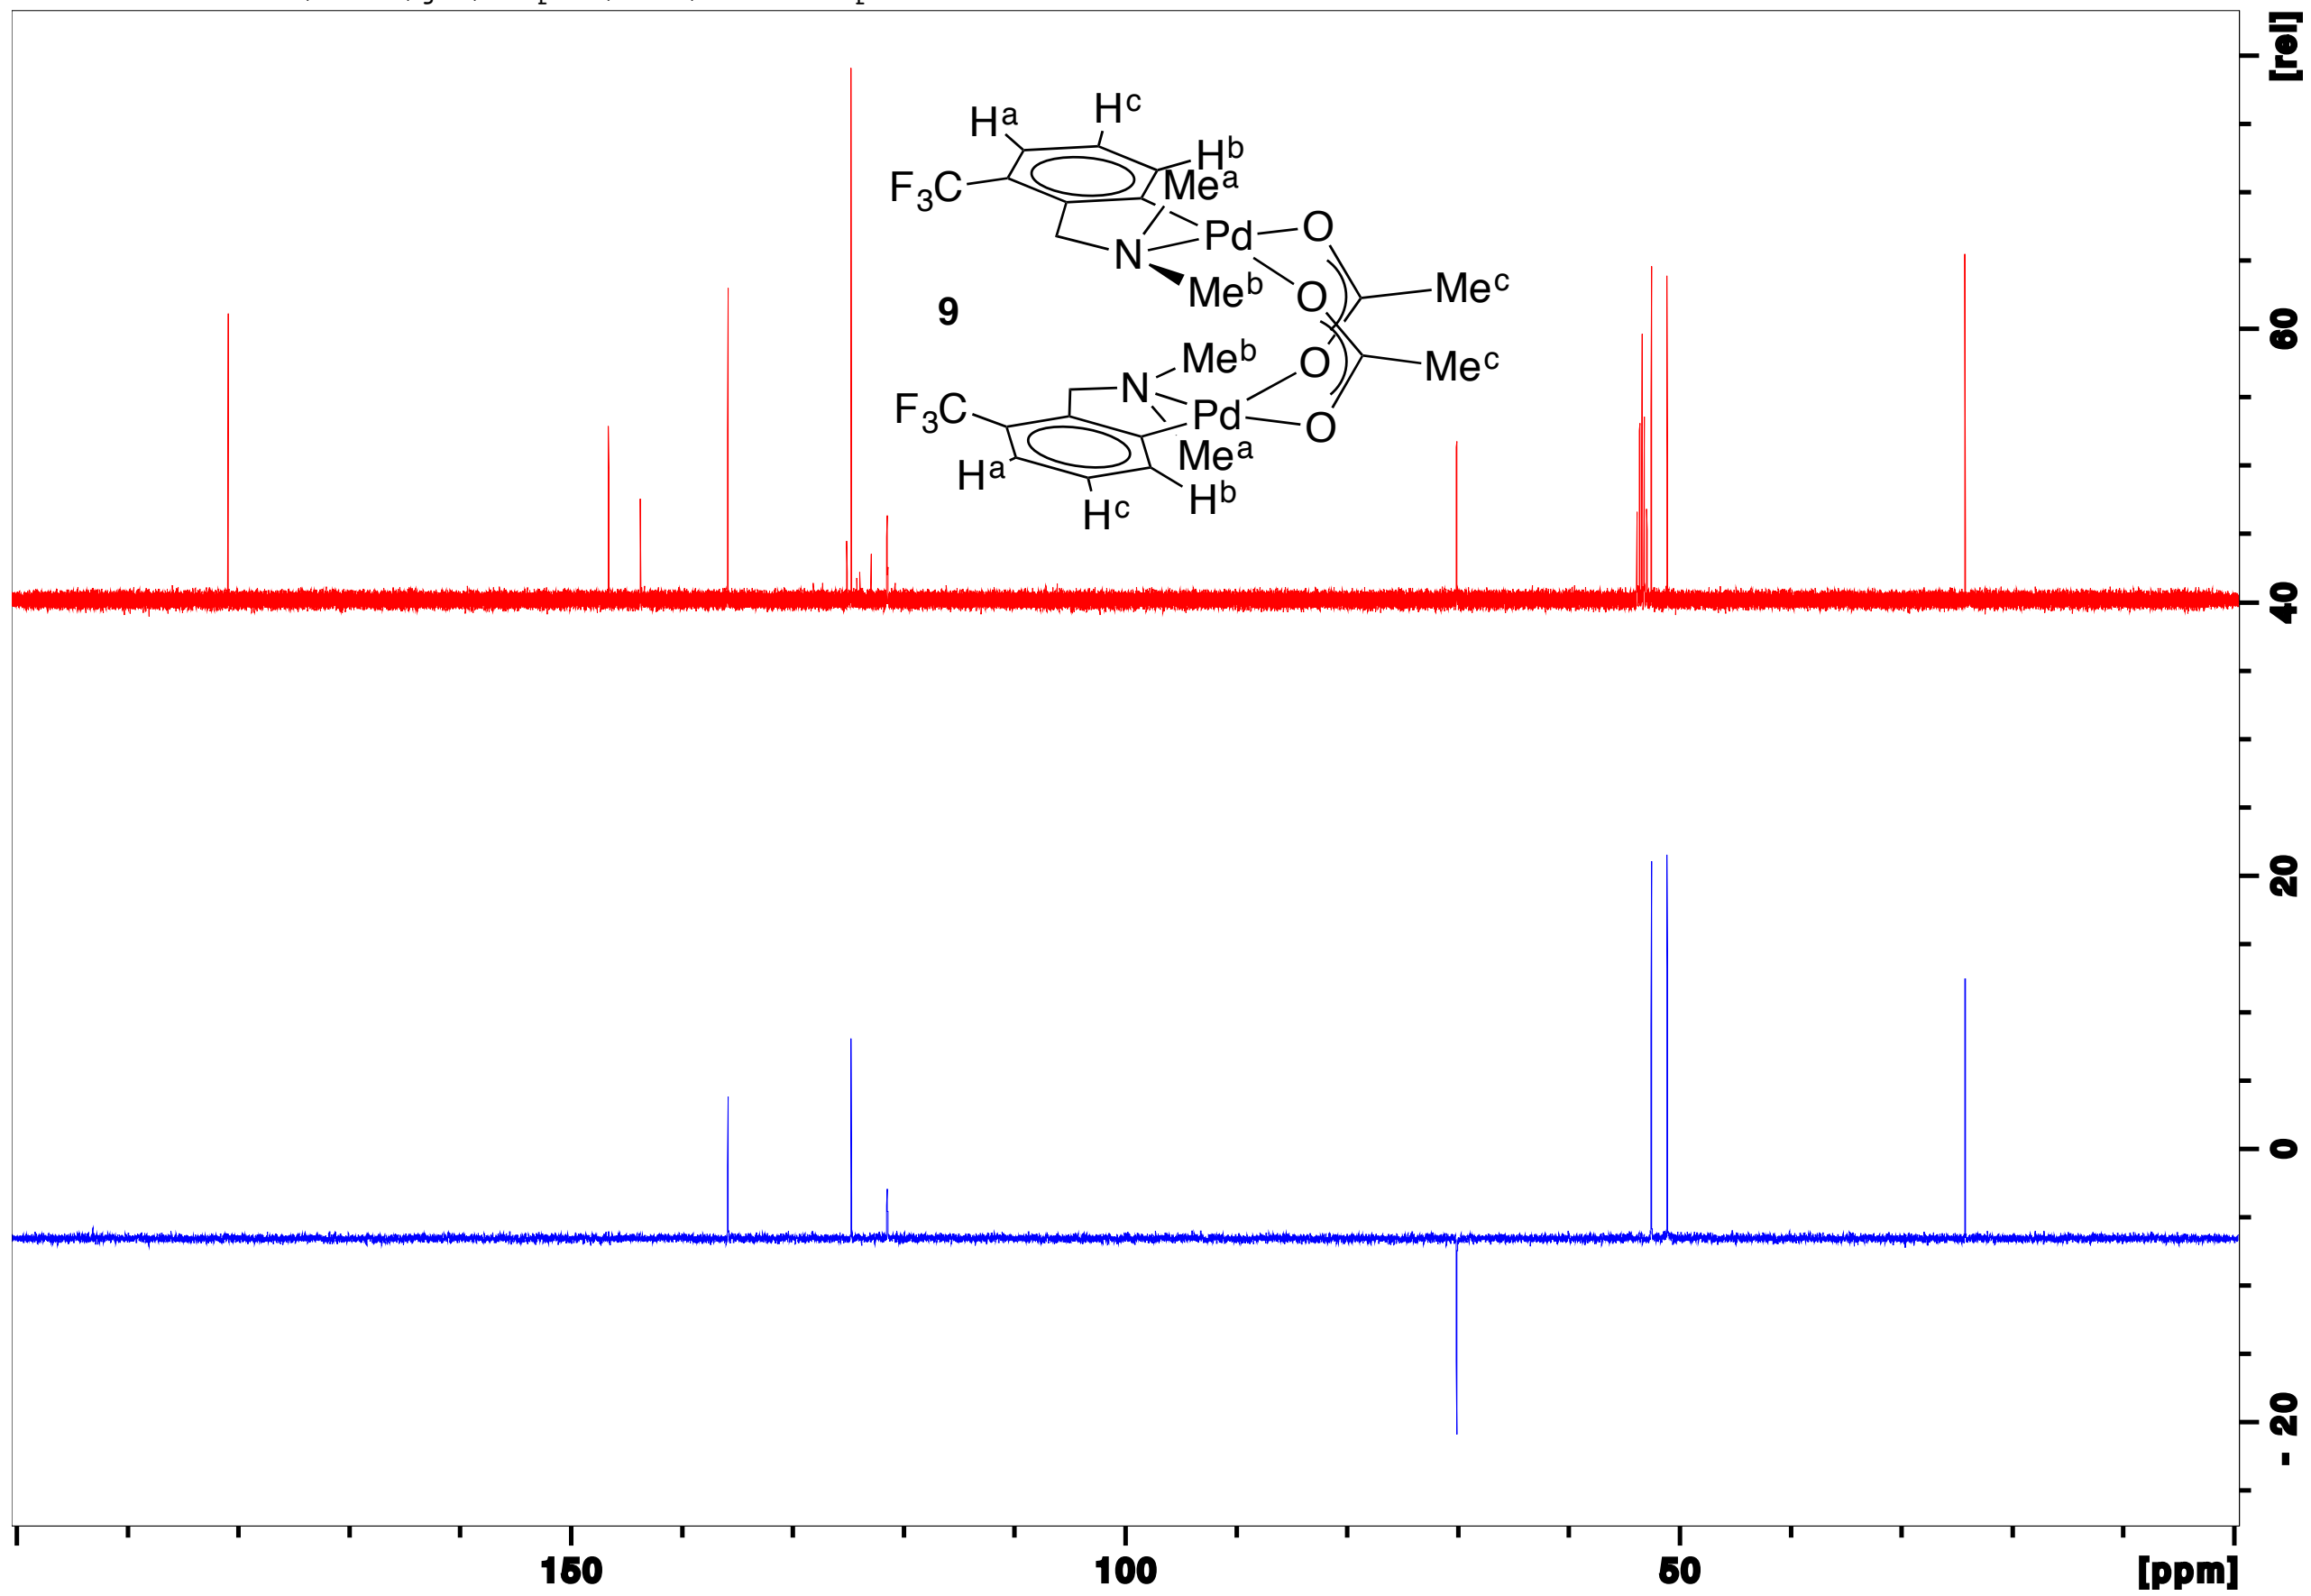

$^{13}\text{C}\{^1\text{H}\}$  [Pd(*o*-CF<sub>3</sub>-dmba)(OAc)<sub>2</sub>]  $^{13}\text{C}$  aromatic region

JJG09042 2 1 "/Users/joe/Dropbox/Grad/NMR Backups"

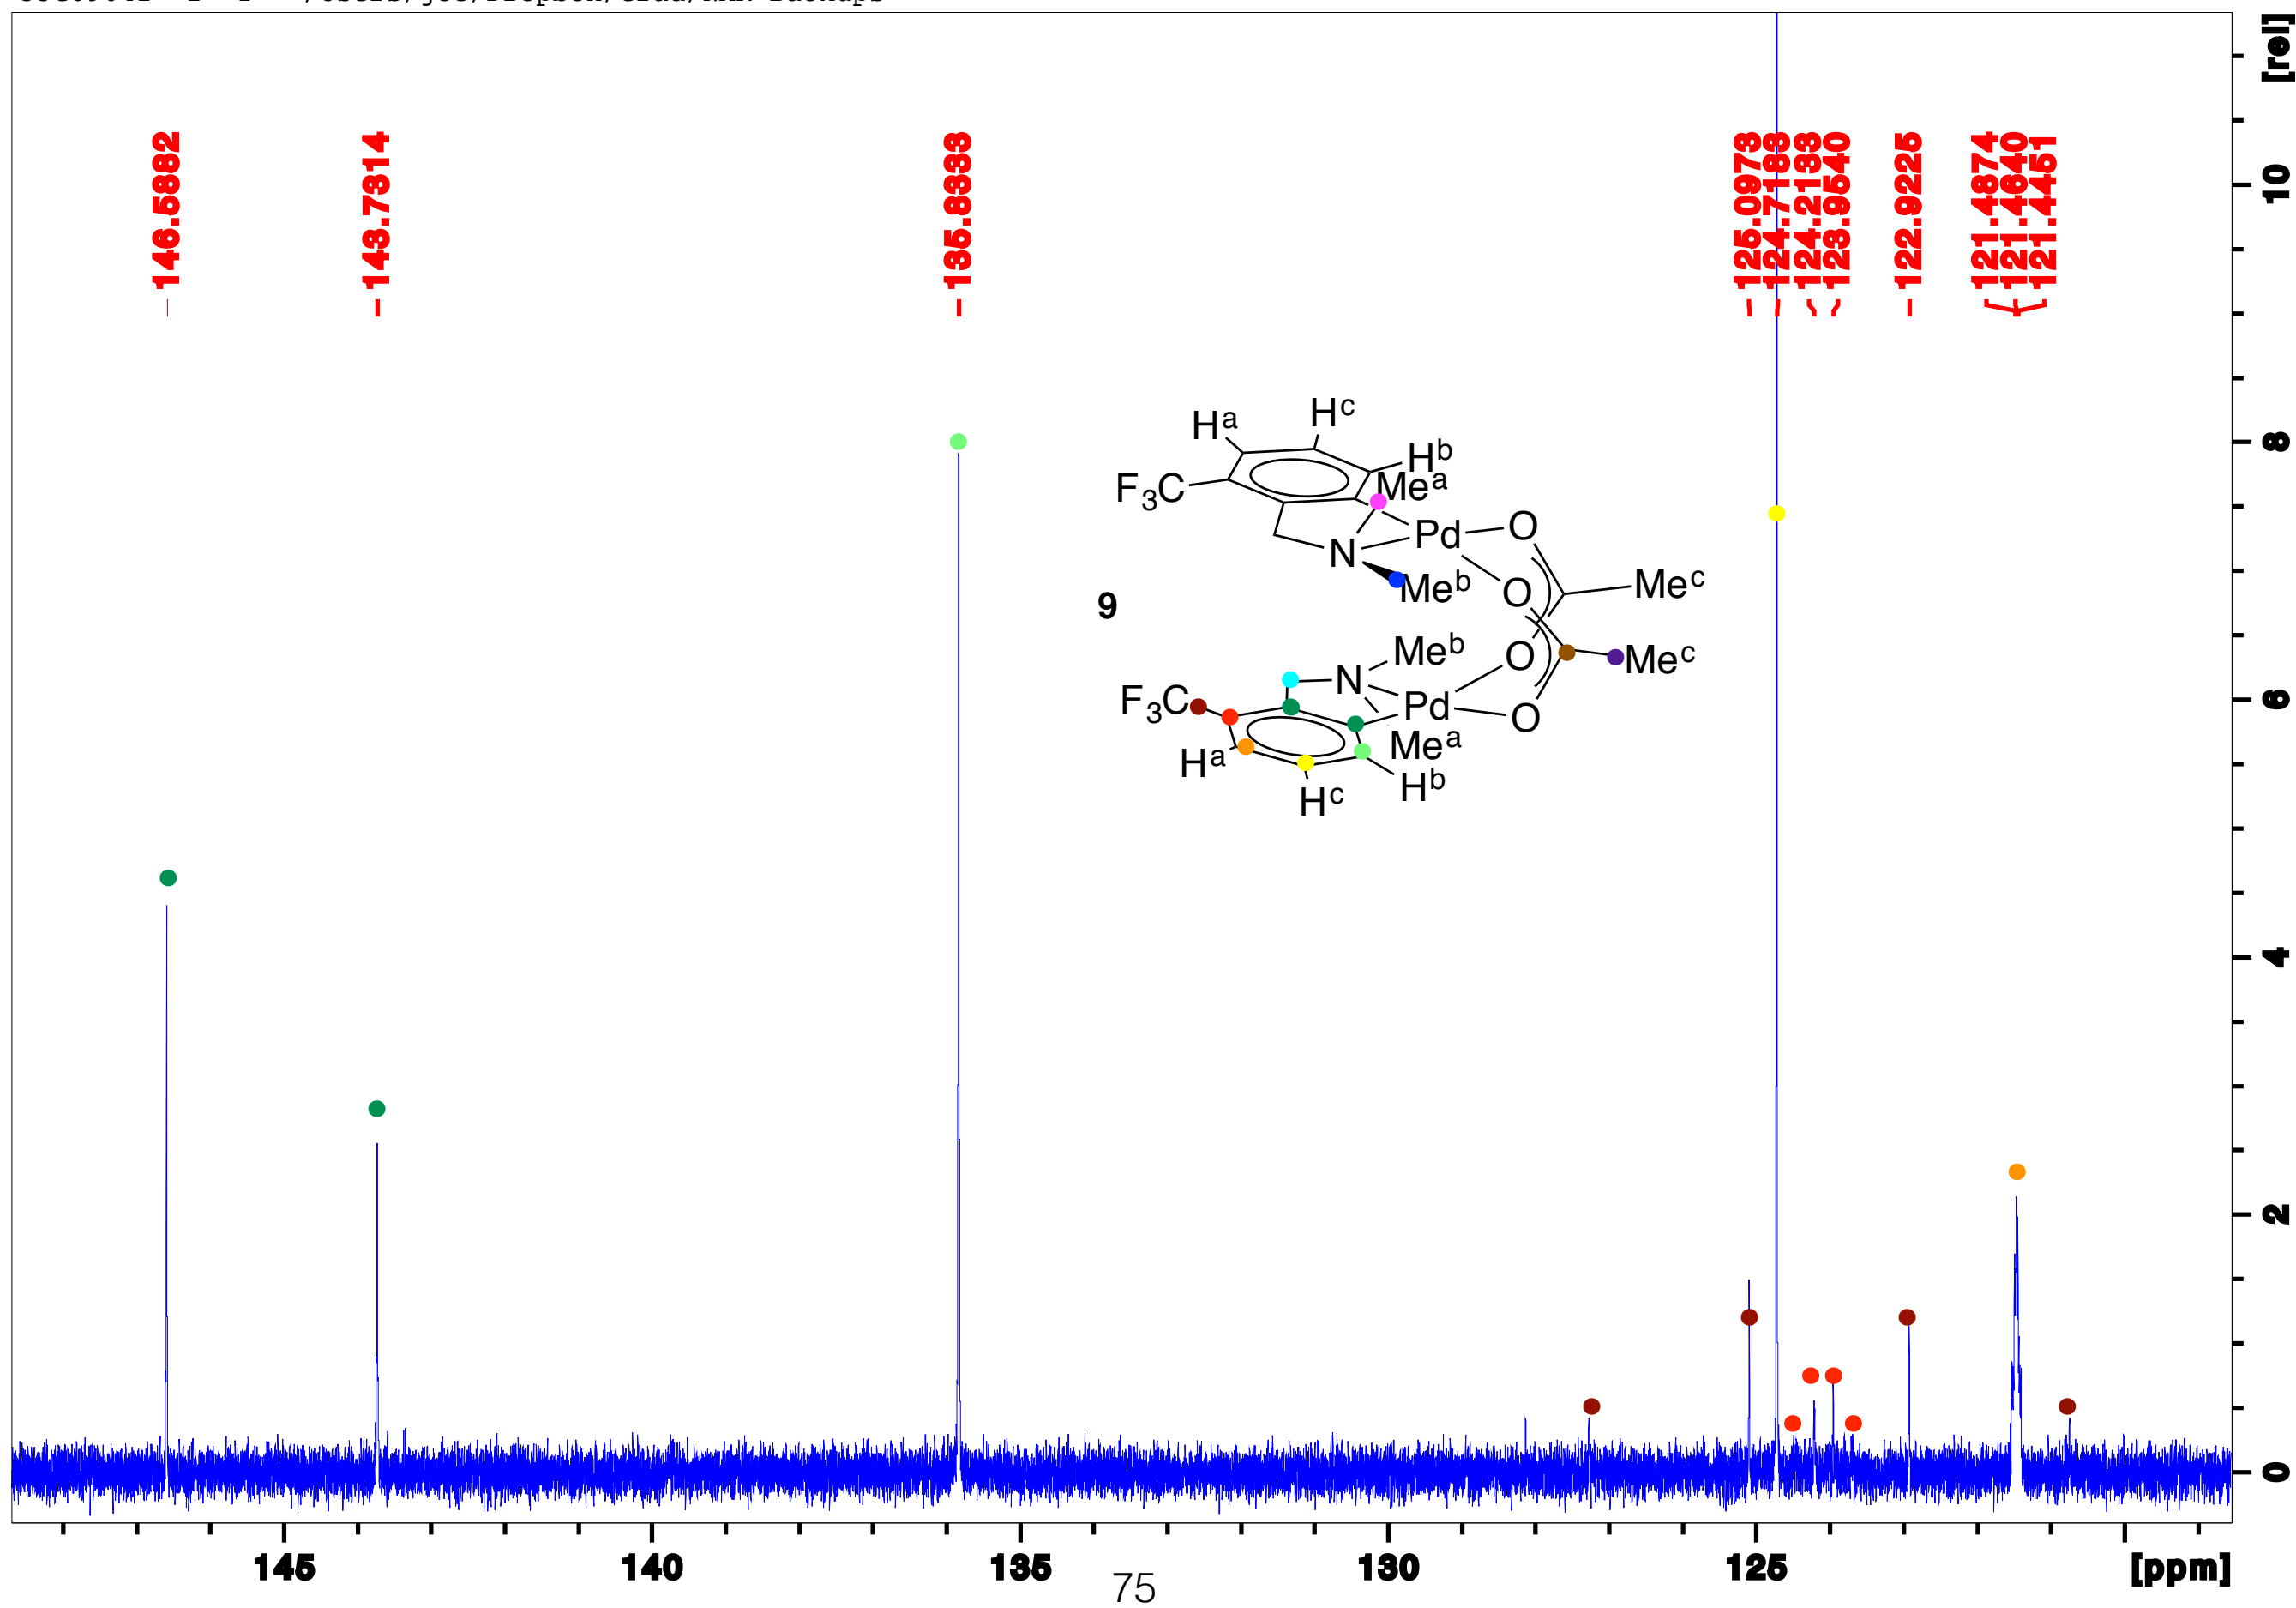

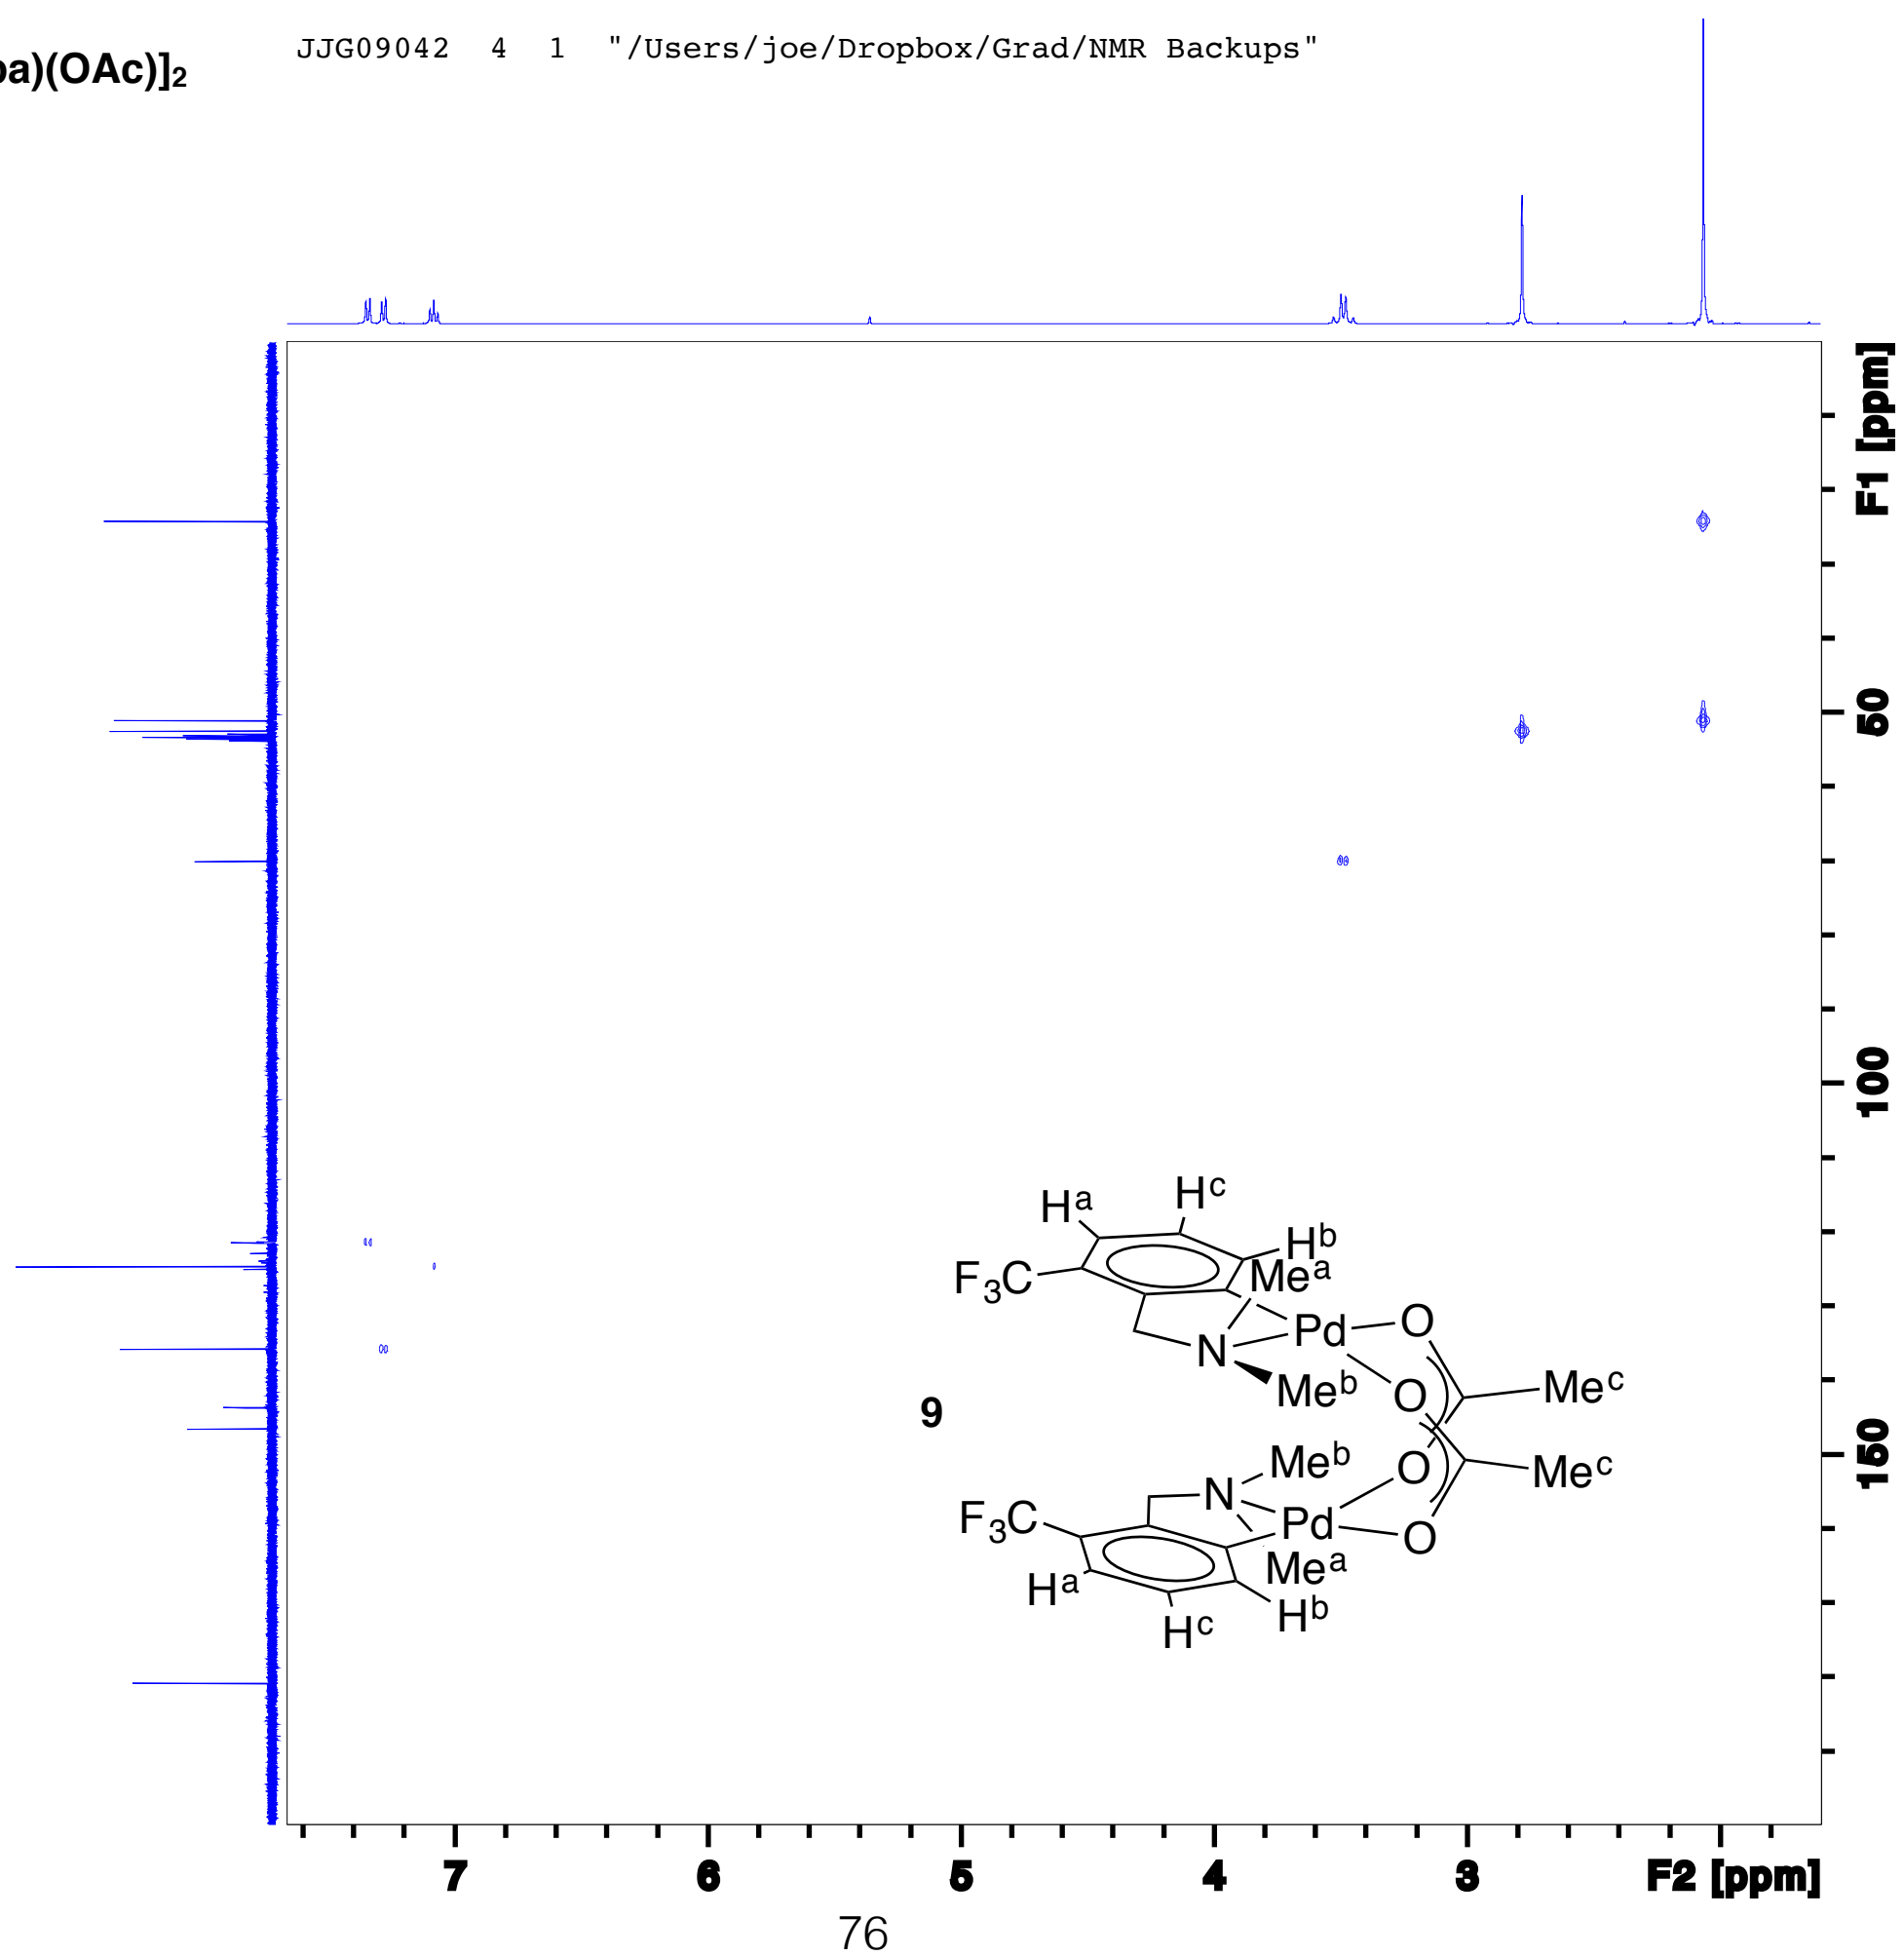



# $^1\text{H}$ in $\text{C}_6\text{D}_6$ $[\text{Pd}(\text{o-CF}_3\text{-dmba})(\text{OAc})_2]$

Current Data Parameters  
NAME JYG09074  
EXPNO 5  
PROCNO 1

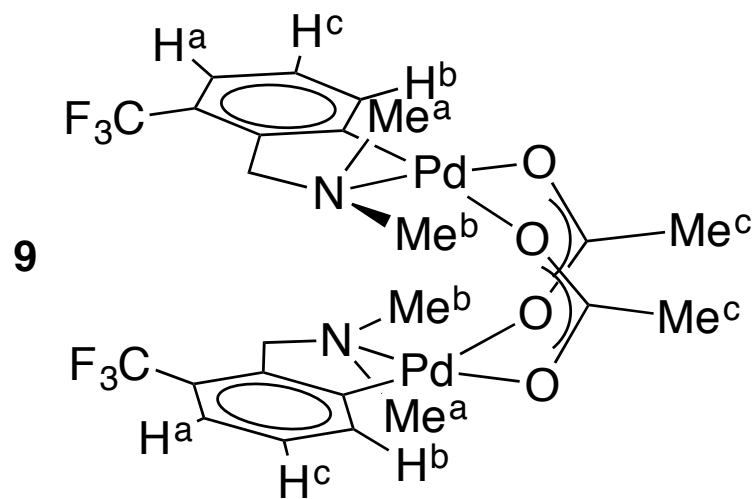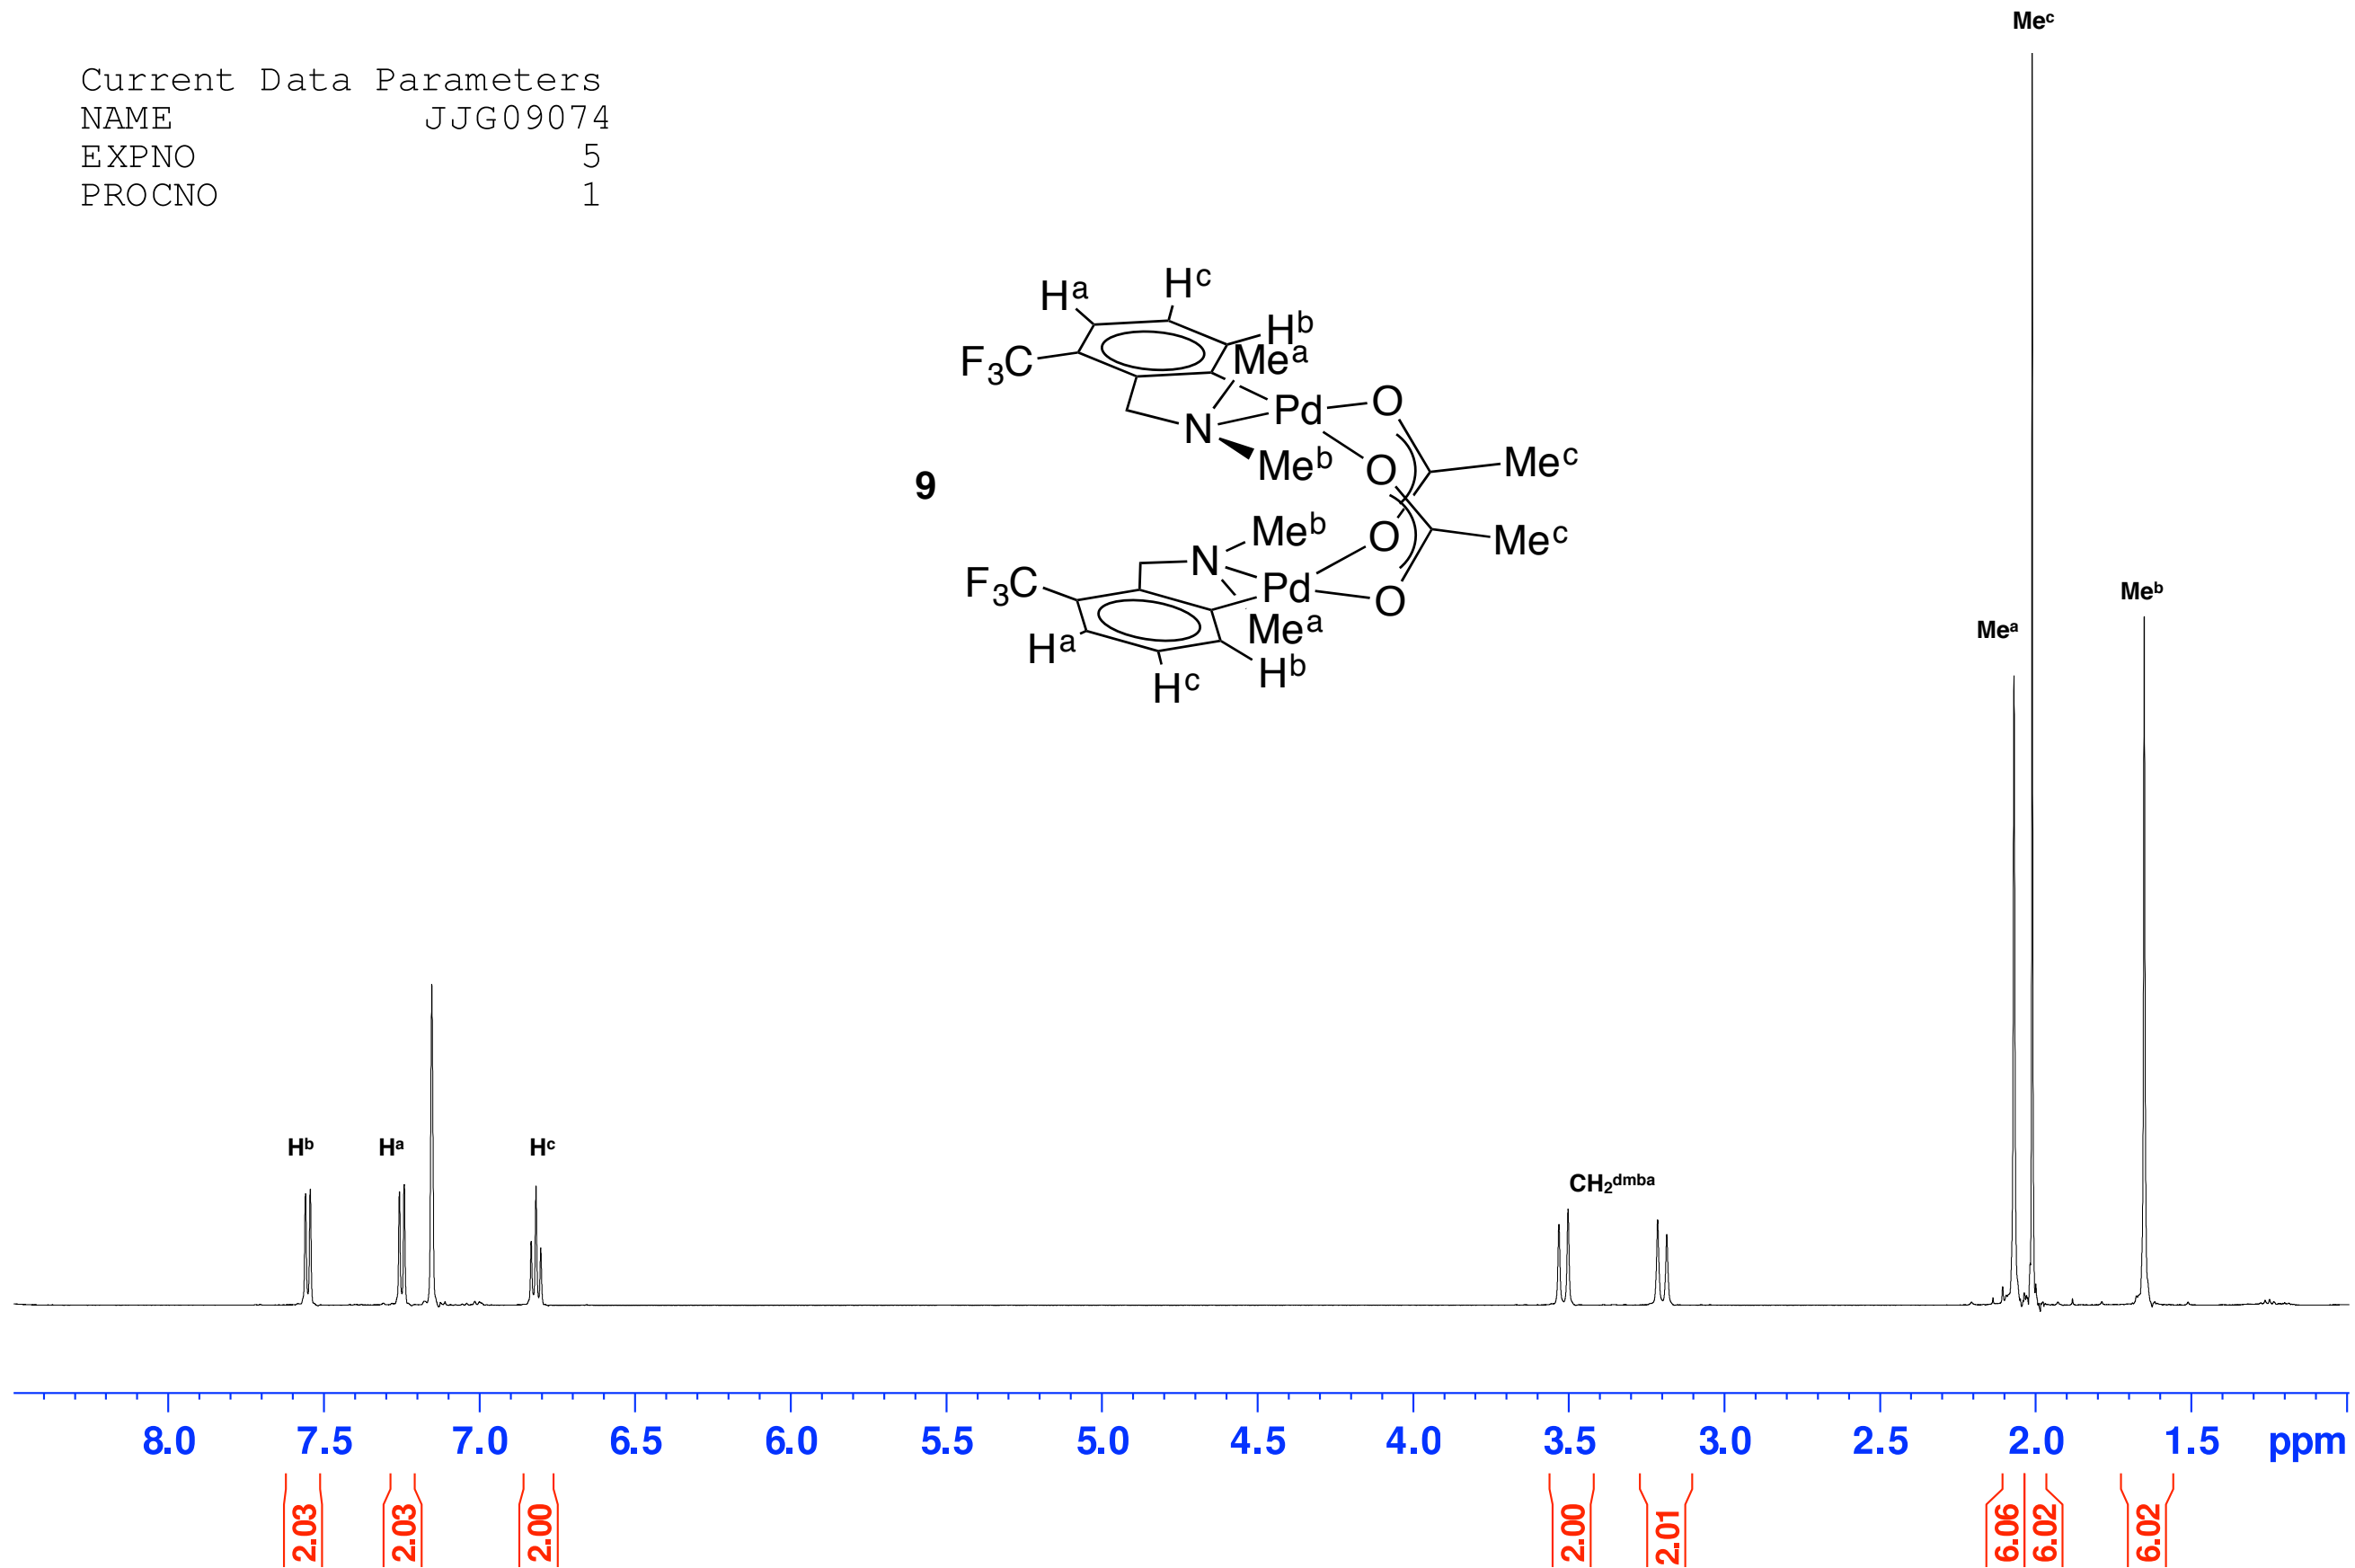

Key NOE cross peak  
**9** [Pd(CF<sub>3</sub>-dmba)(OAc)]<sub>2</sub>

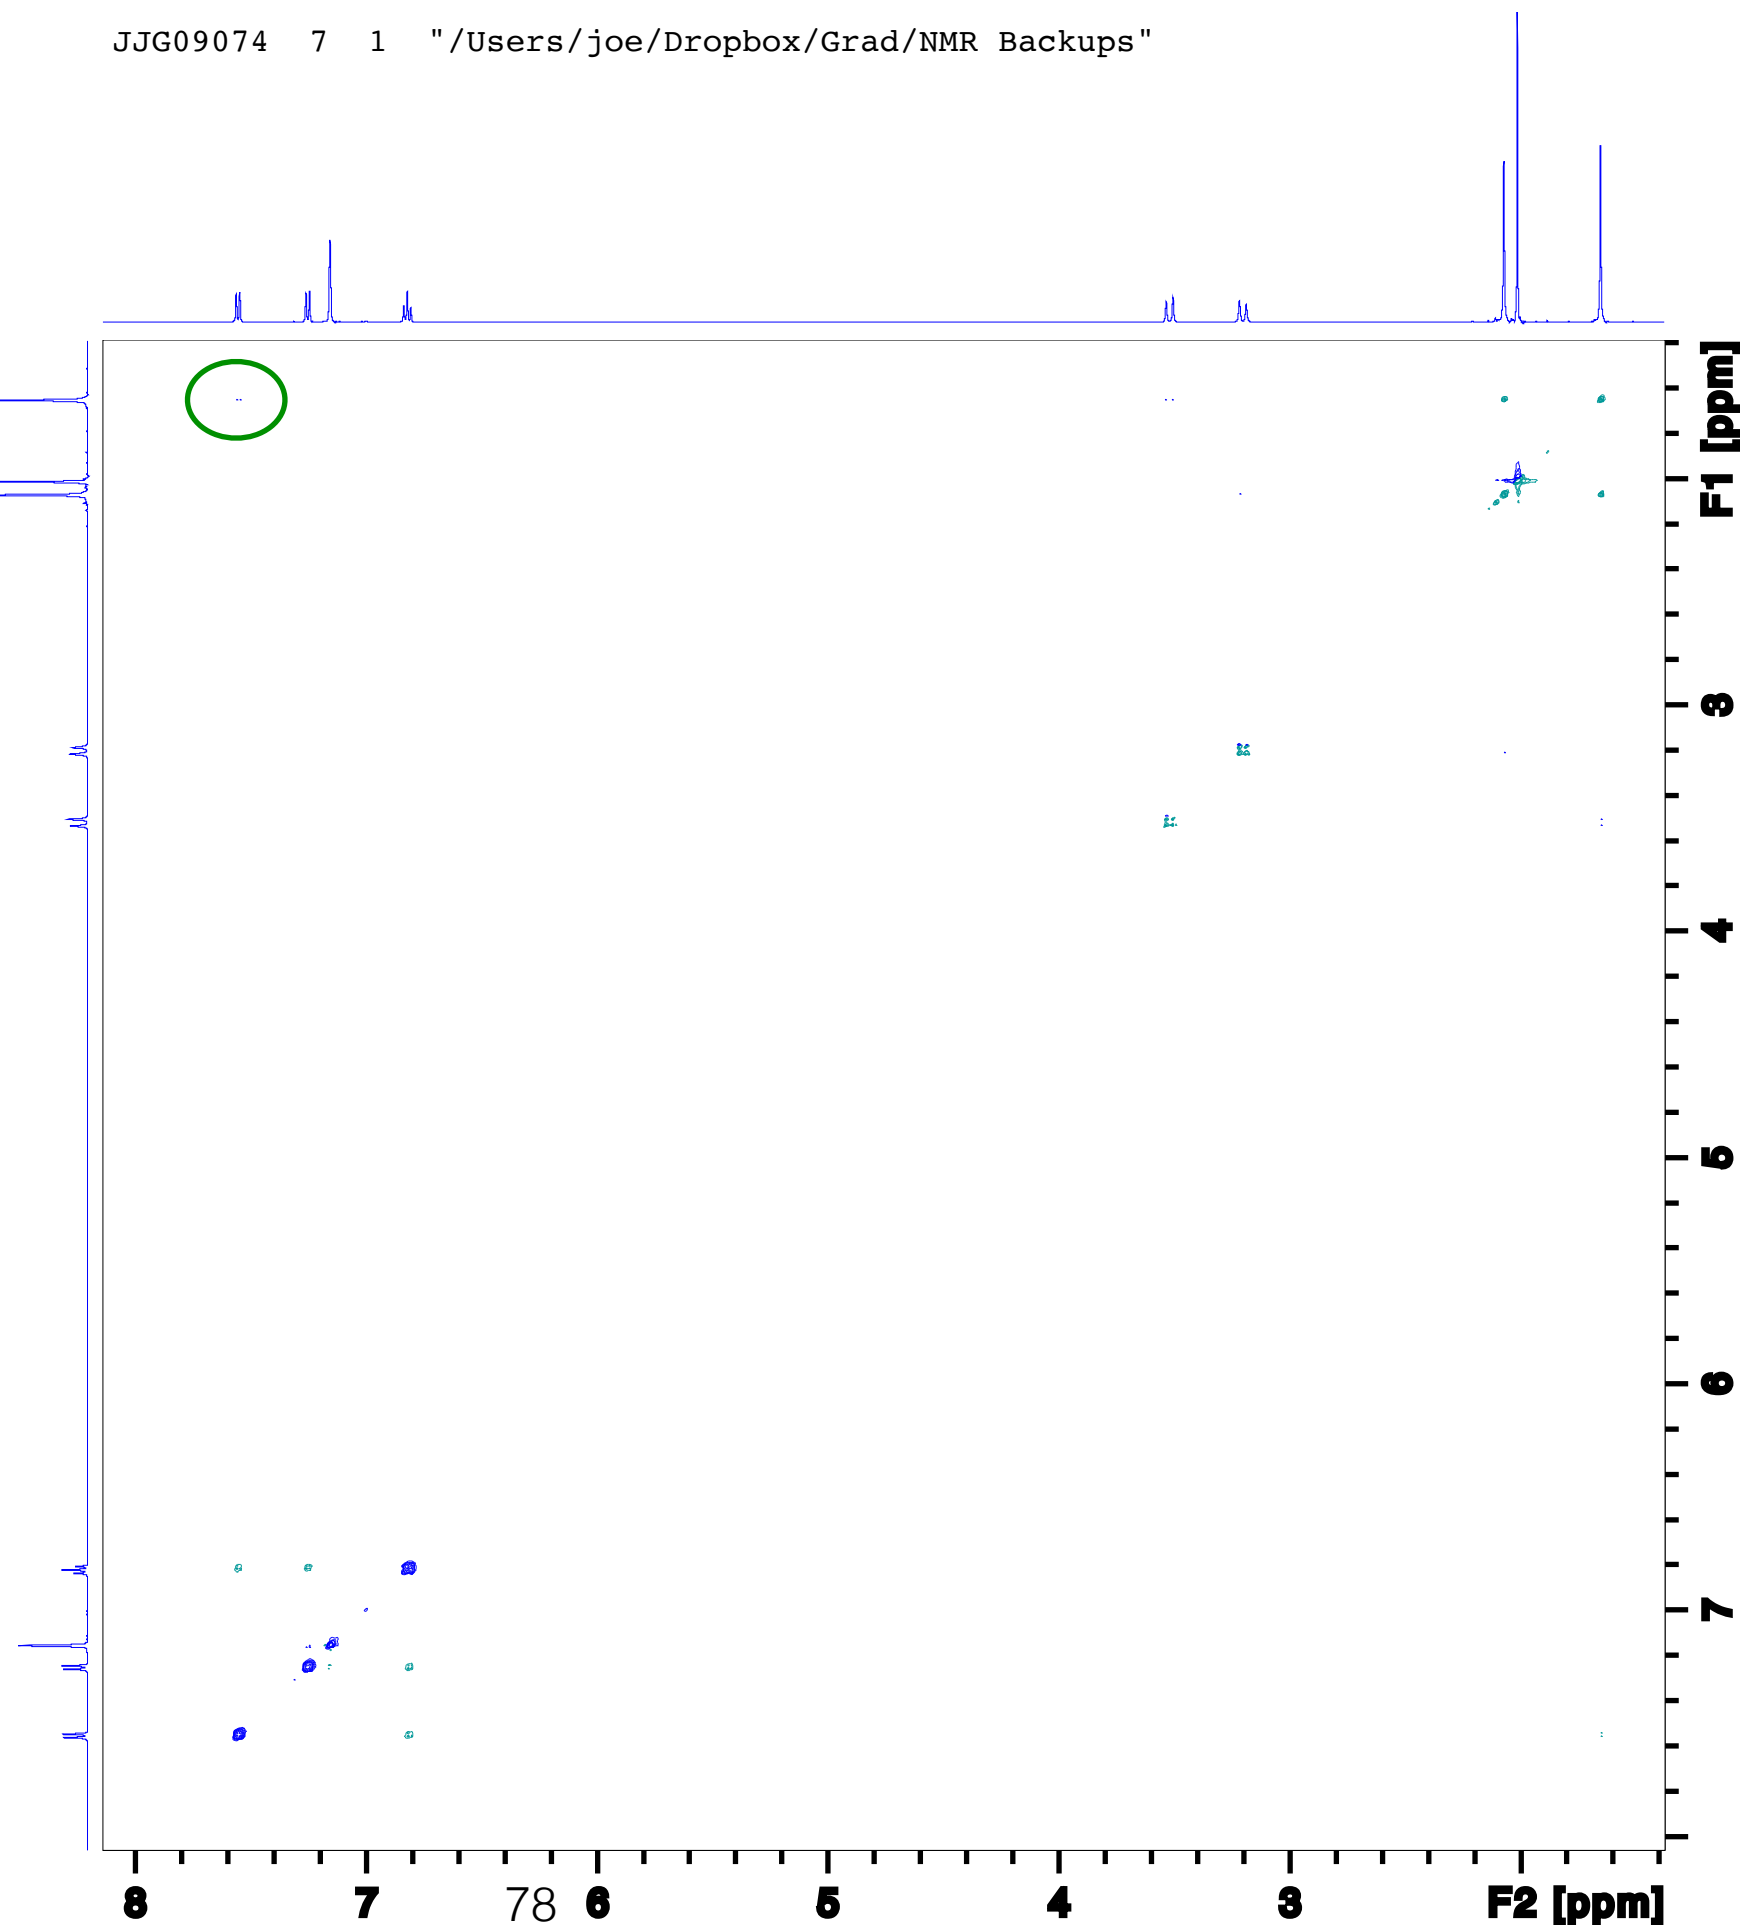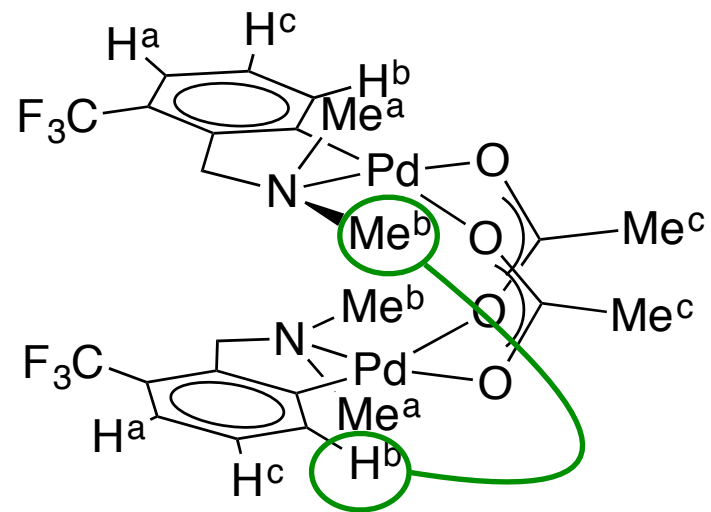

### Overlaid $^{13}\text{C}$ NMR of **9** and **6a-d**

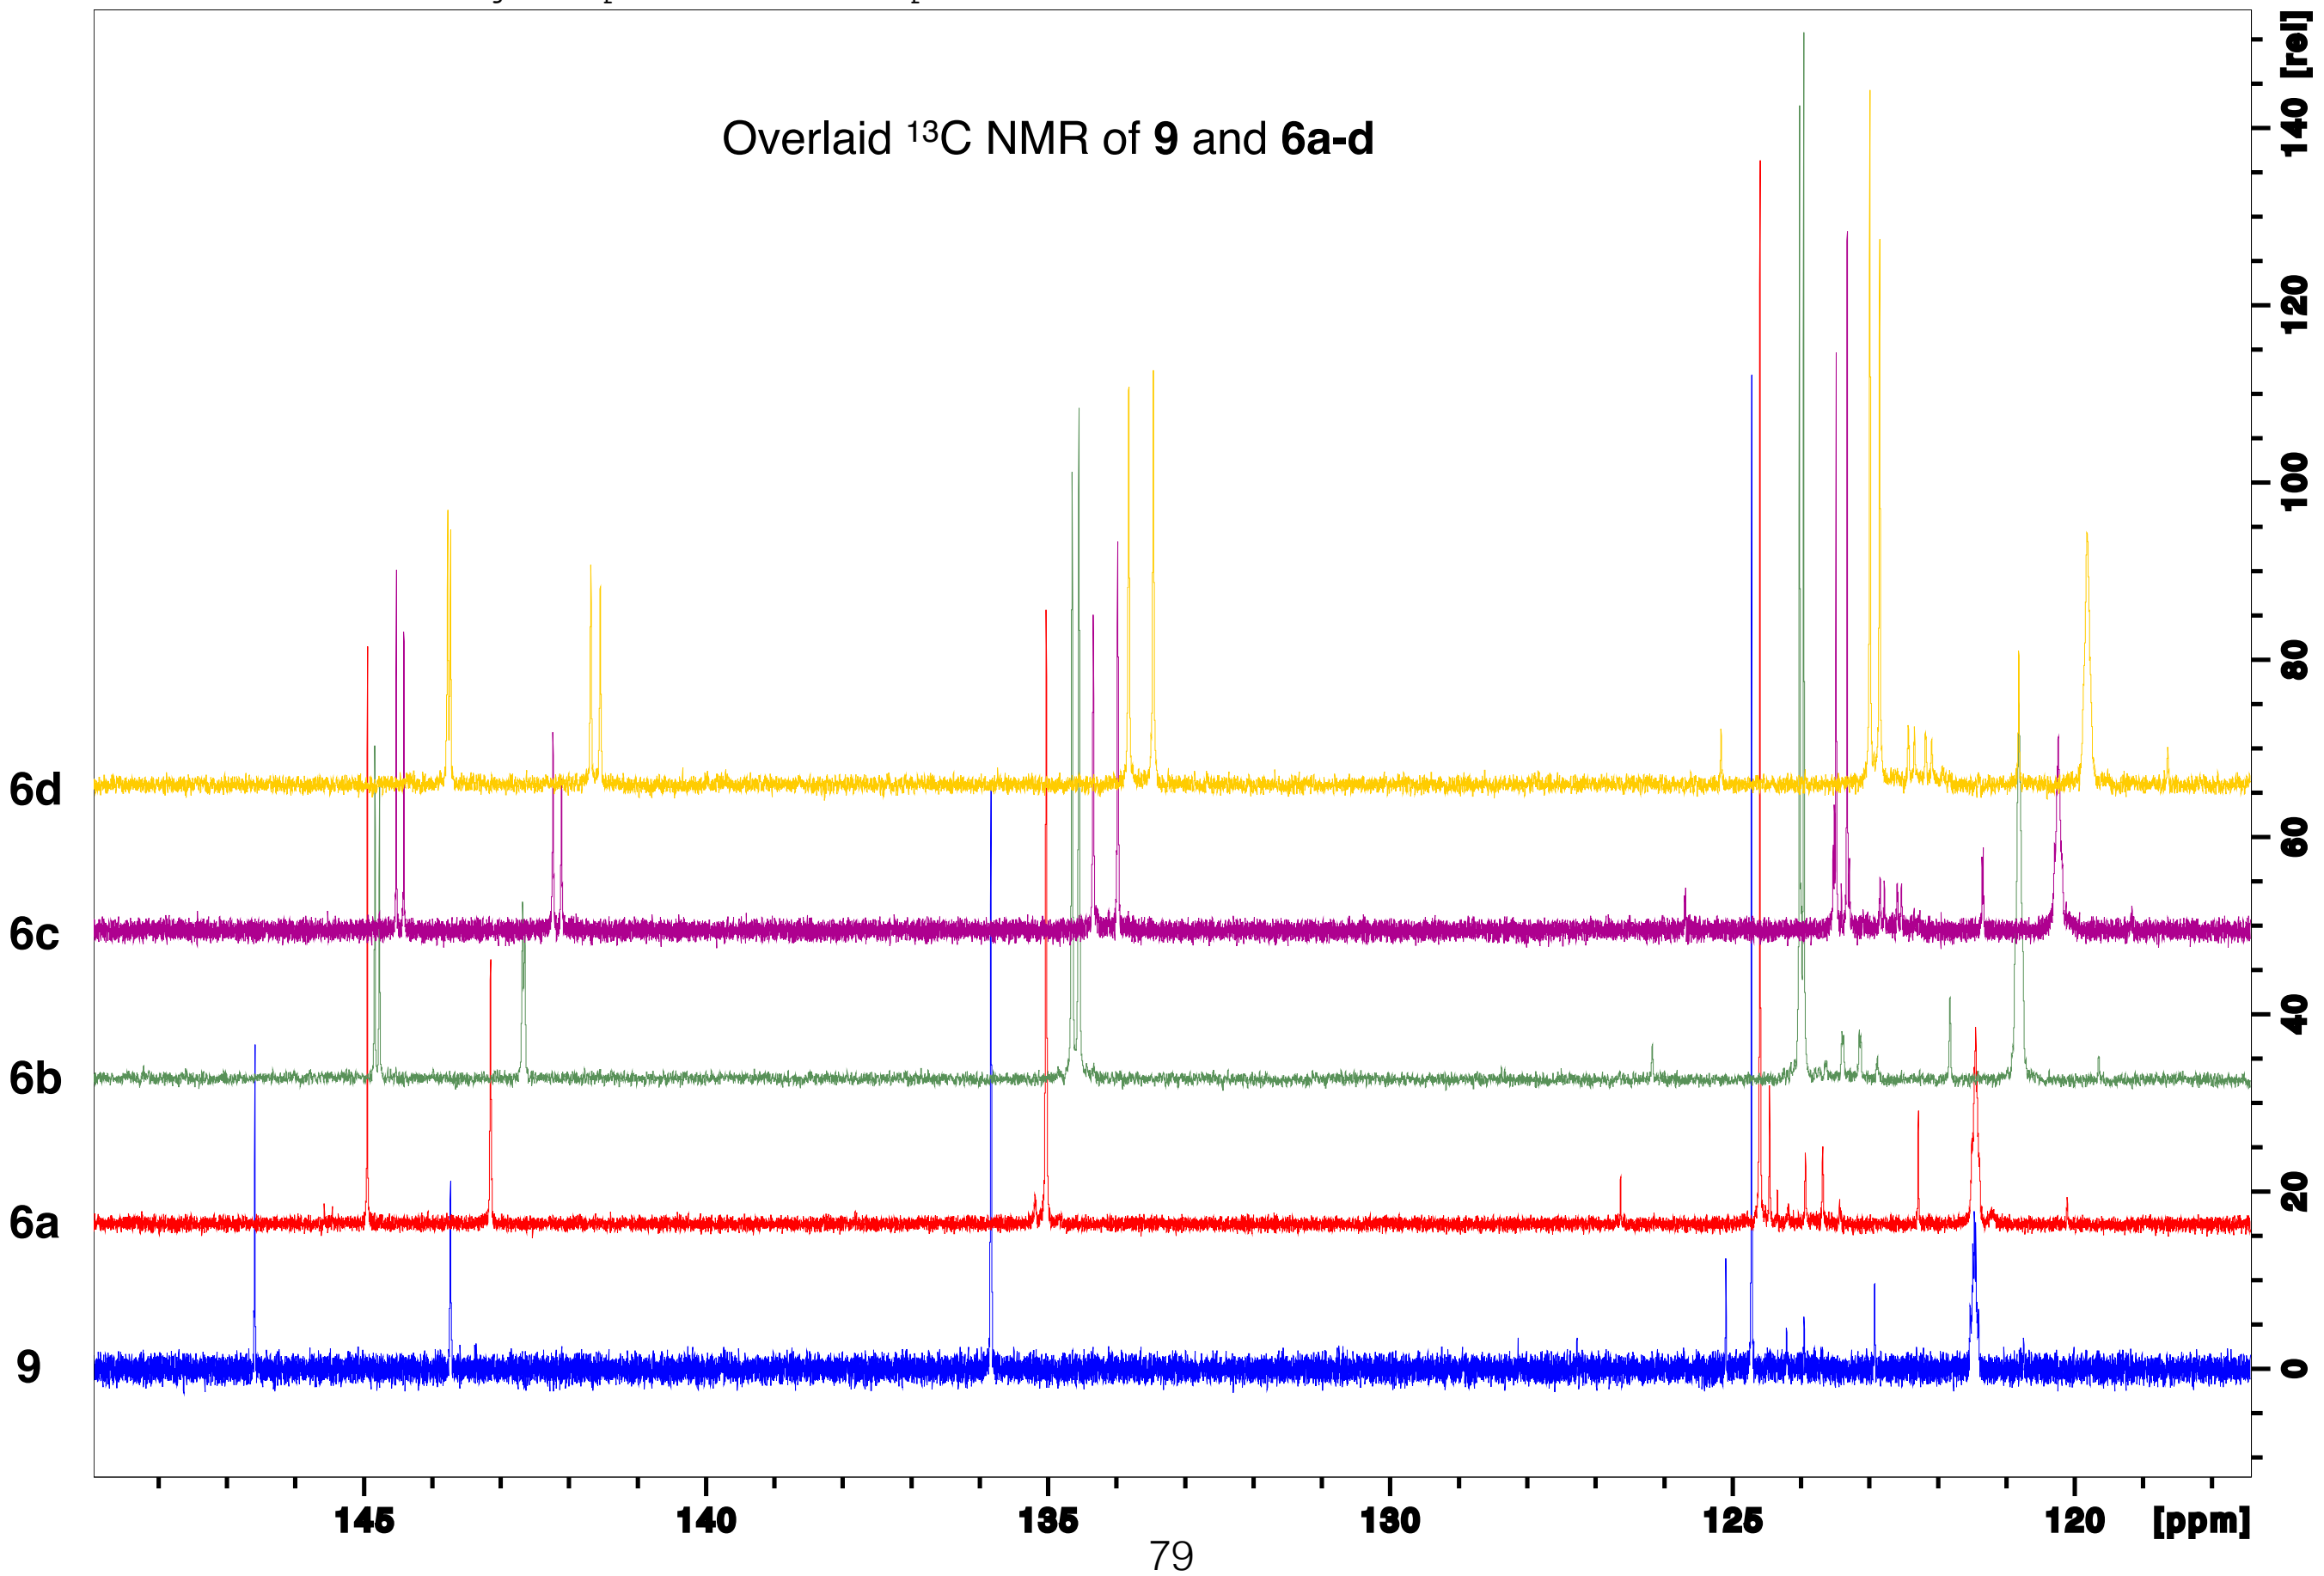

7.415  
7.401  
7.386  
7.344  
7.328  
7.051  
7.036  
7.020

<sup>1</sup>H 8  
[Pd(CF<sub>3</sub>-dmba)(Cl)]<sub>2</sub>

4.144  
4.139

2.903  
2.888

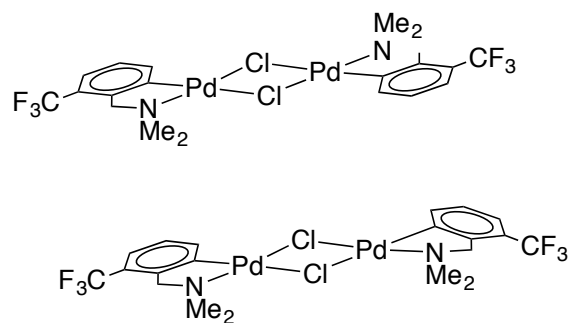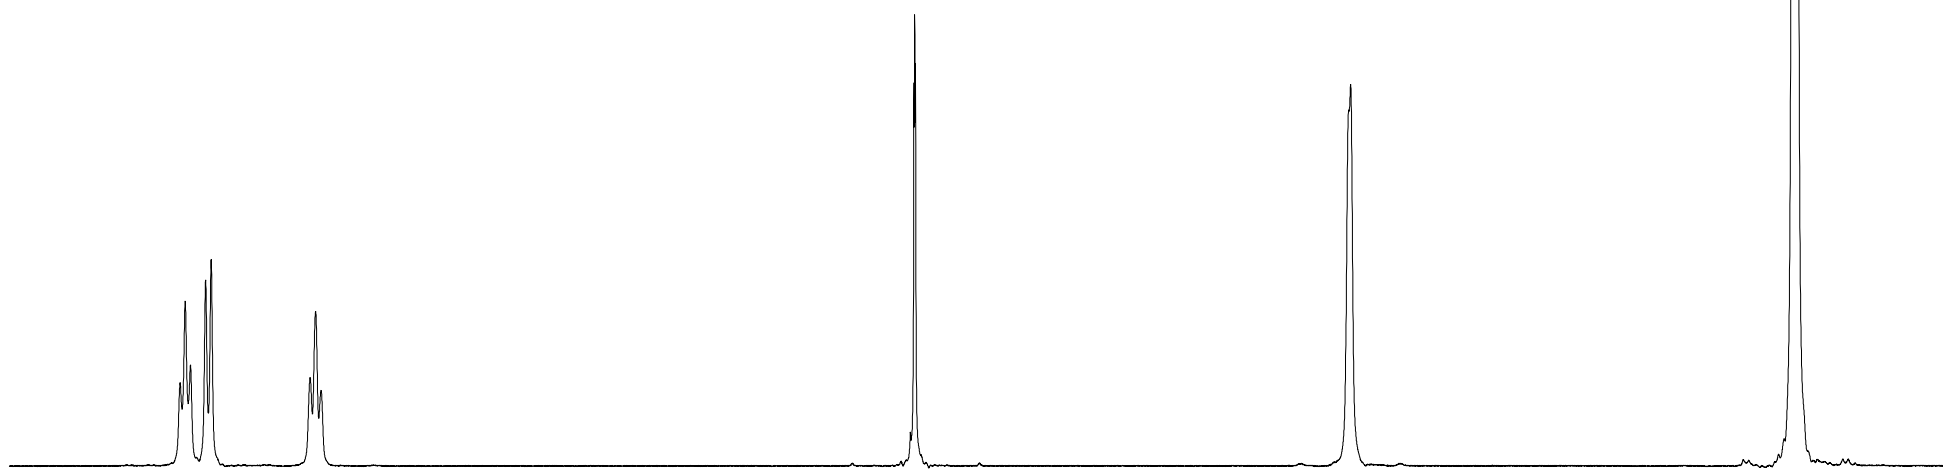

Current Data Parameters  
NAME JYG06187  
EXPNO 1  
PROCNO 1

F2 - Acquisition Parameter  
Date\_ 20160521  
Time 14.42  
INSTRUM spect  
PROBHD 5 mm PABBO BB/  
PULPROG zg  
TD 59998  
SOLVENT CD2Cl2  
NS 1  
DS 0  
SWH 10000.000 Hz  
FIDRES 0.166672 Hz  
AQ 2.9999001 sec  
RG 51.11  
DW 50.000 usec  
DE 6.50 usec  
TE 296.9 K  
D1 20.00000000 sec  
TD0 1

==== CHANNEL f1 =====  
SFO1 499.8730869 MHz  
NUC1 1H  
P1 10.75 usec  
PLW1 18.25000000 W

F2 - Processing parameters  
SI 65536  
SF 499.8700000 MHz  
WDW no  
SSB 0  
LB 0 Hz  
GB 0  
PC 1.00

7.5 7.0 6.5 6.0 5.5 5.0 4.5 4.0 3.5 3.0 ppm

1.00  
0.99  
1.00

2.00

6.01

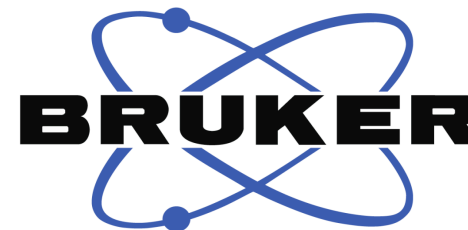

Current Data Parameters  
NAME JYG06187  
EXPNO 2  
PROCNO 1

F2 - Acquisition Parameter  
Date\_ 20160521  
Time 14.42  
INSTRUM spect  
PROBHD 5 mm PABBO BB/  
PULPROG zgflqr  
TD 524288  
SOLVENT CD2Cl2  
NS 1  
DS 0  
SWH 117187.500 Hz  
FIDRES 0.223517 Hz  
AQ 2.2369621 sec  
RG 435.42  
DW 4.267 usec  
DE 6.50 usec  
TE 296.9 K  
D1 3.00000000 sec  
TD0 1

==== CHANNEL f1 =====  
SFO1 470.3181011 MHz  
NUC1 19F  
P1 15.00 usec  
PLW1 37.79999924 W

F2 - Processing parameters  
SI 262144  
SF 470.3477328 MHz  
WDW no  
SSB 0  
LB 0 Hz  
GB 0  
PC 1.00

$^{19}\text{F}$  8  
[Pd(CF<sub>3</sub>-dmba)(Cl)]<sub>2</sub>

-61.646  
-61.682

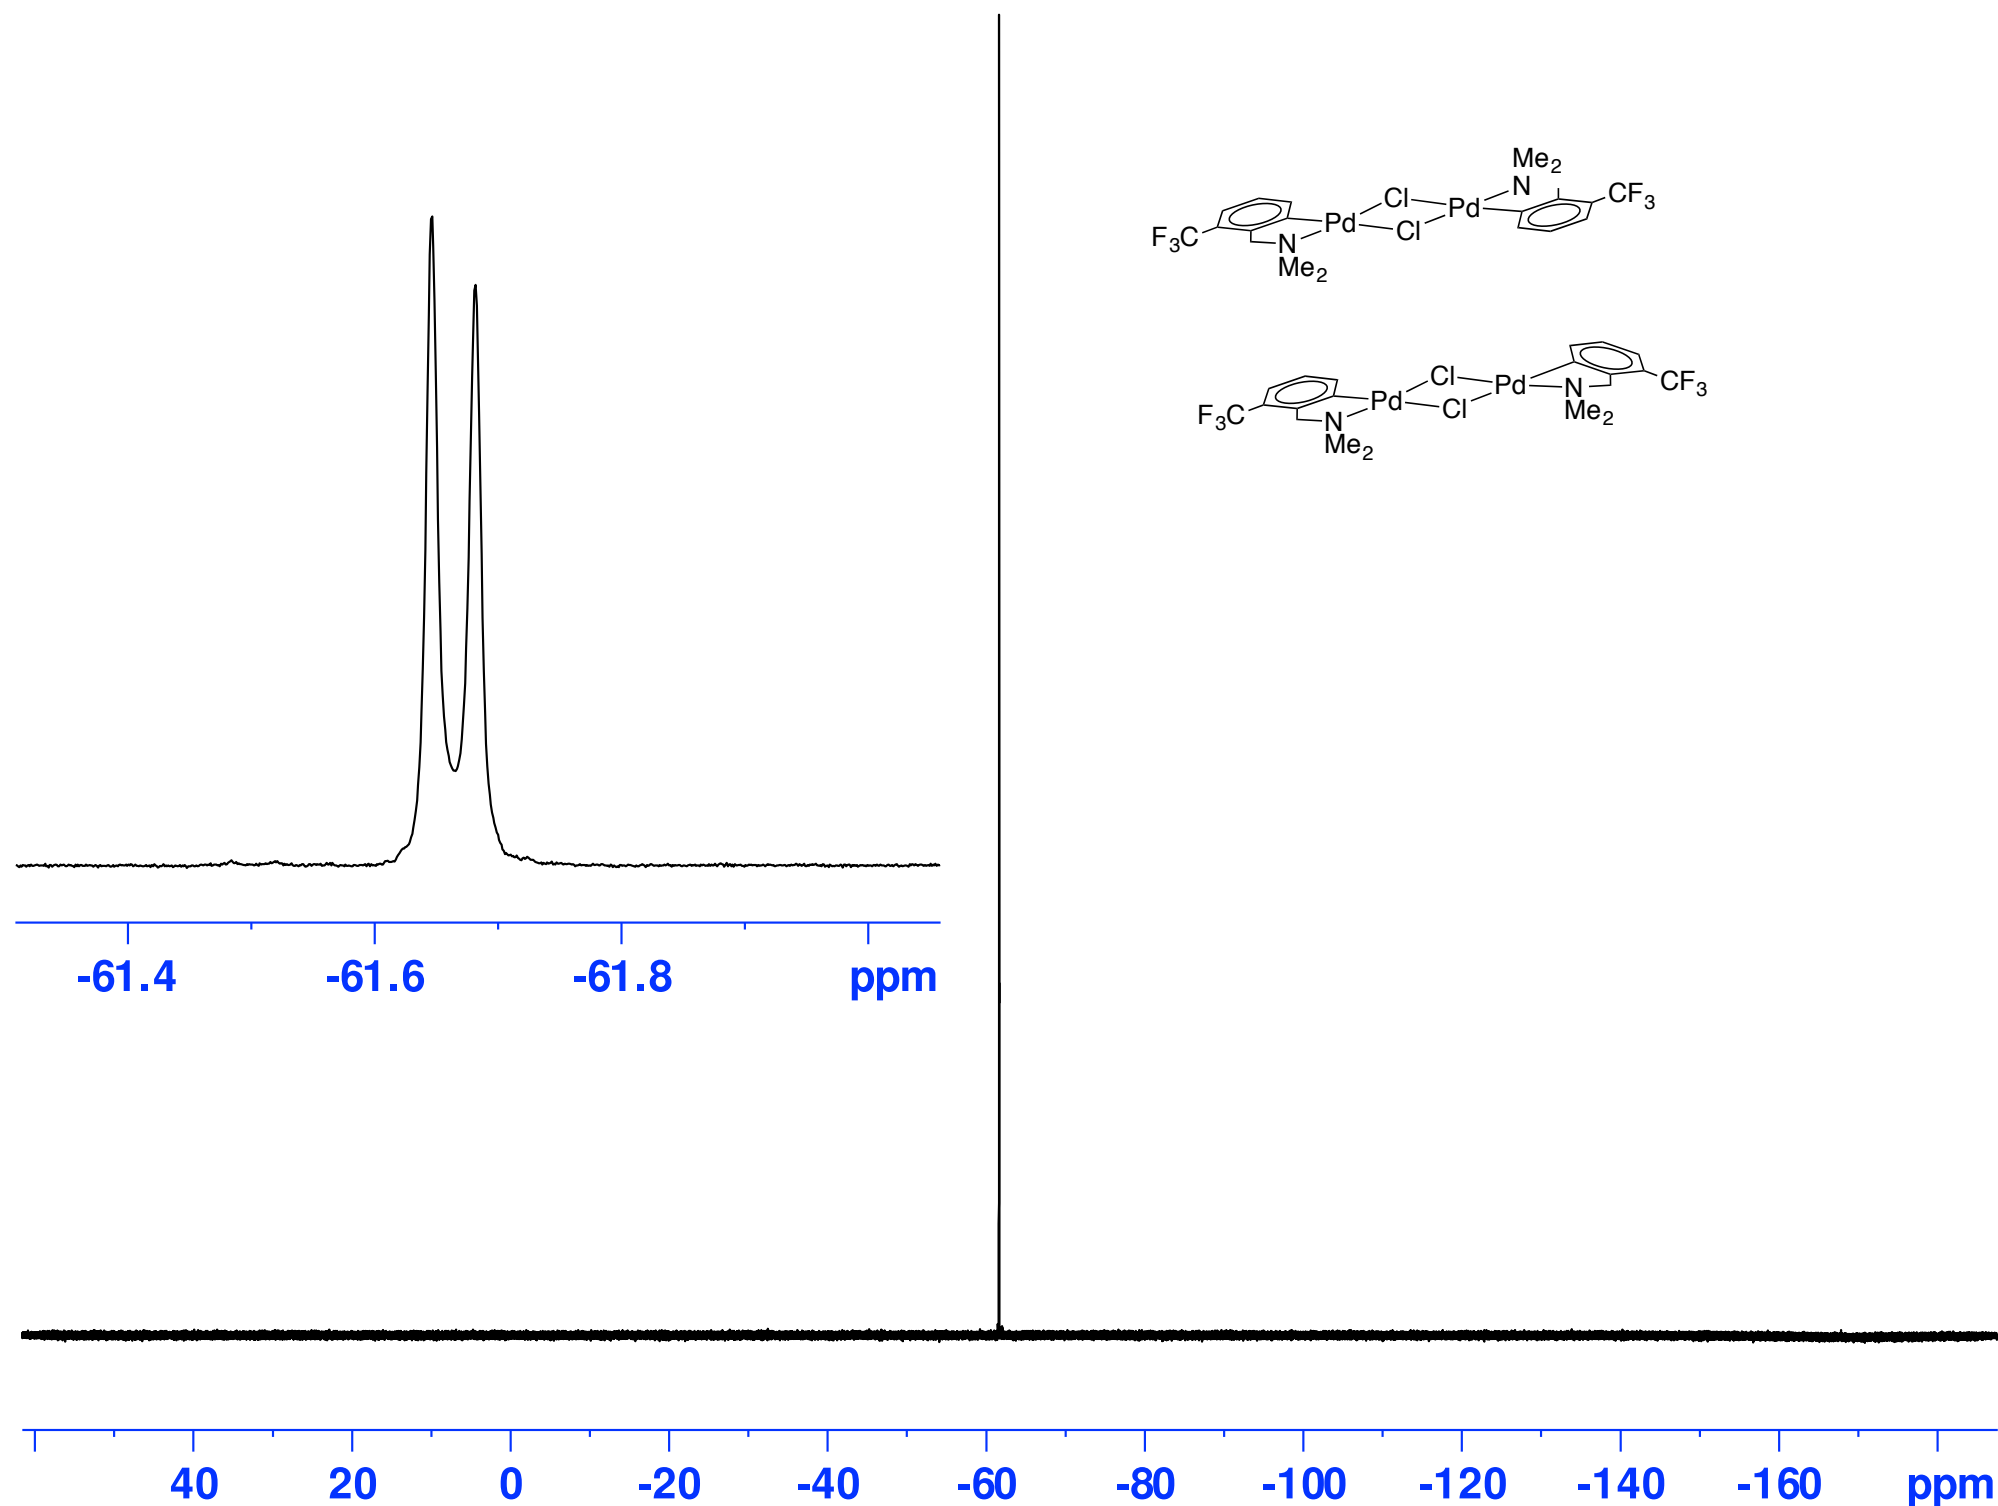

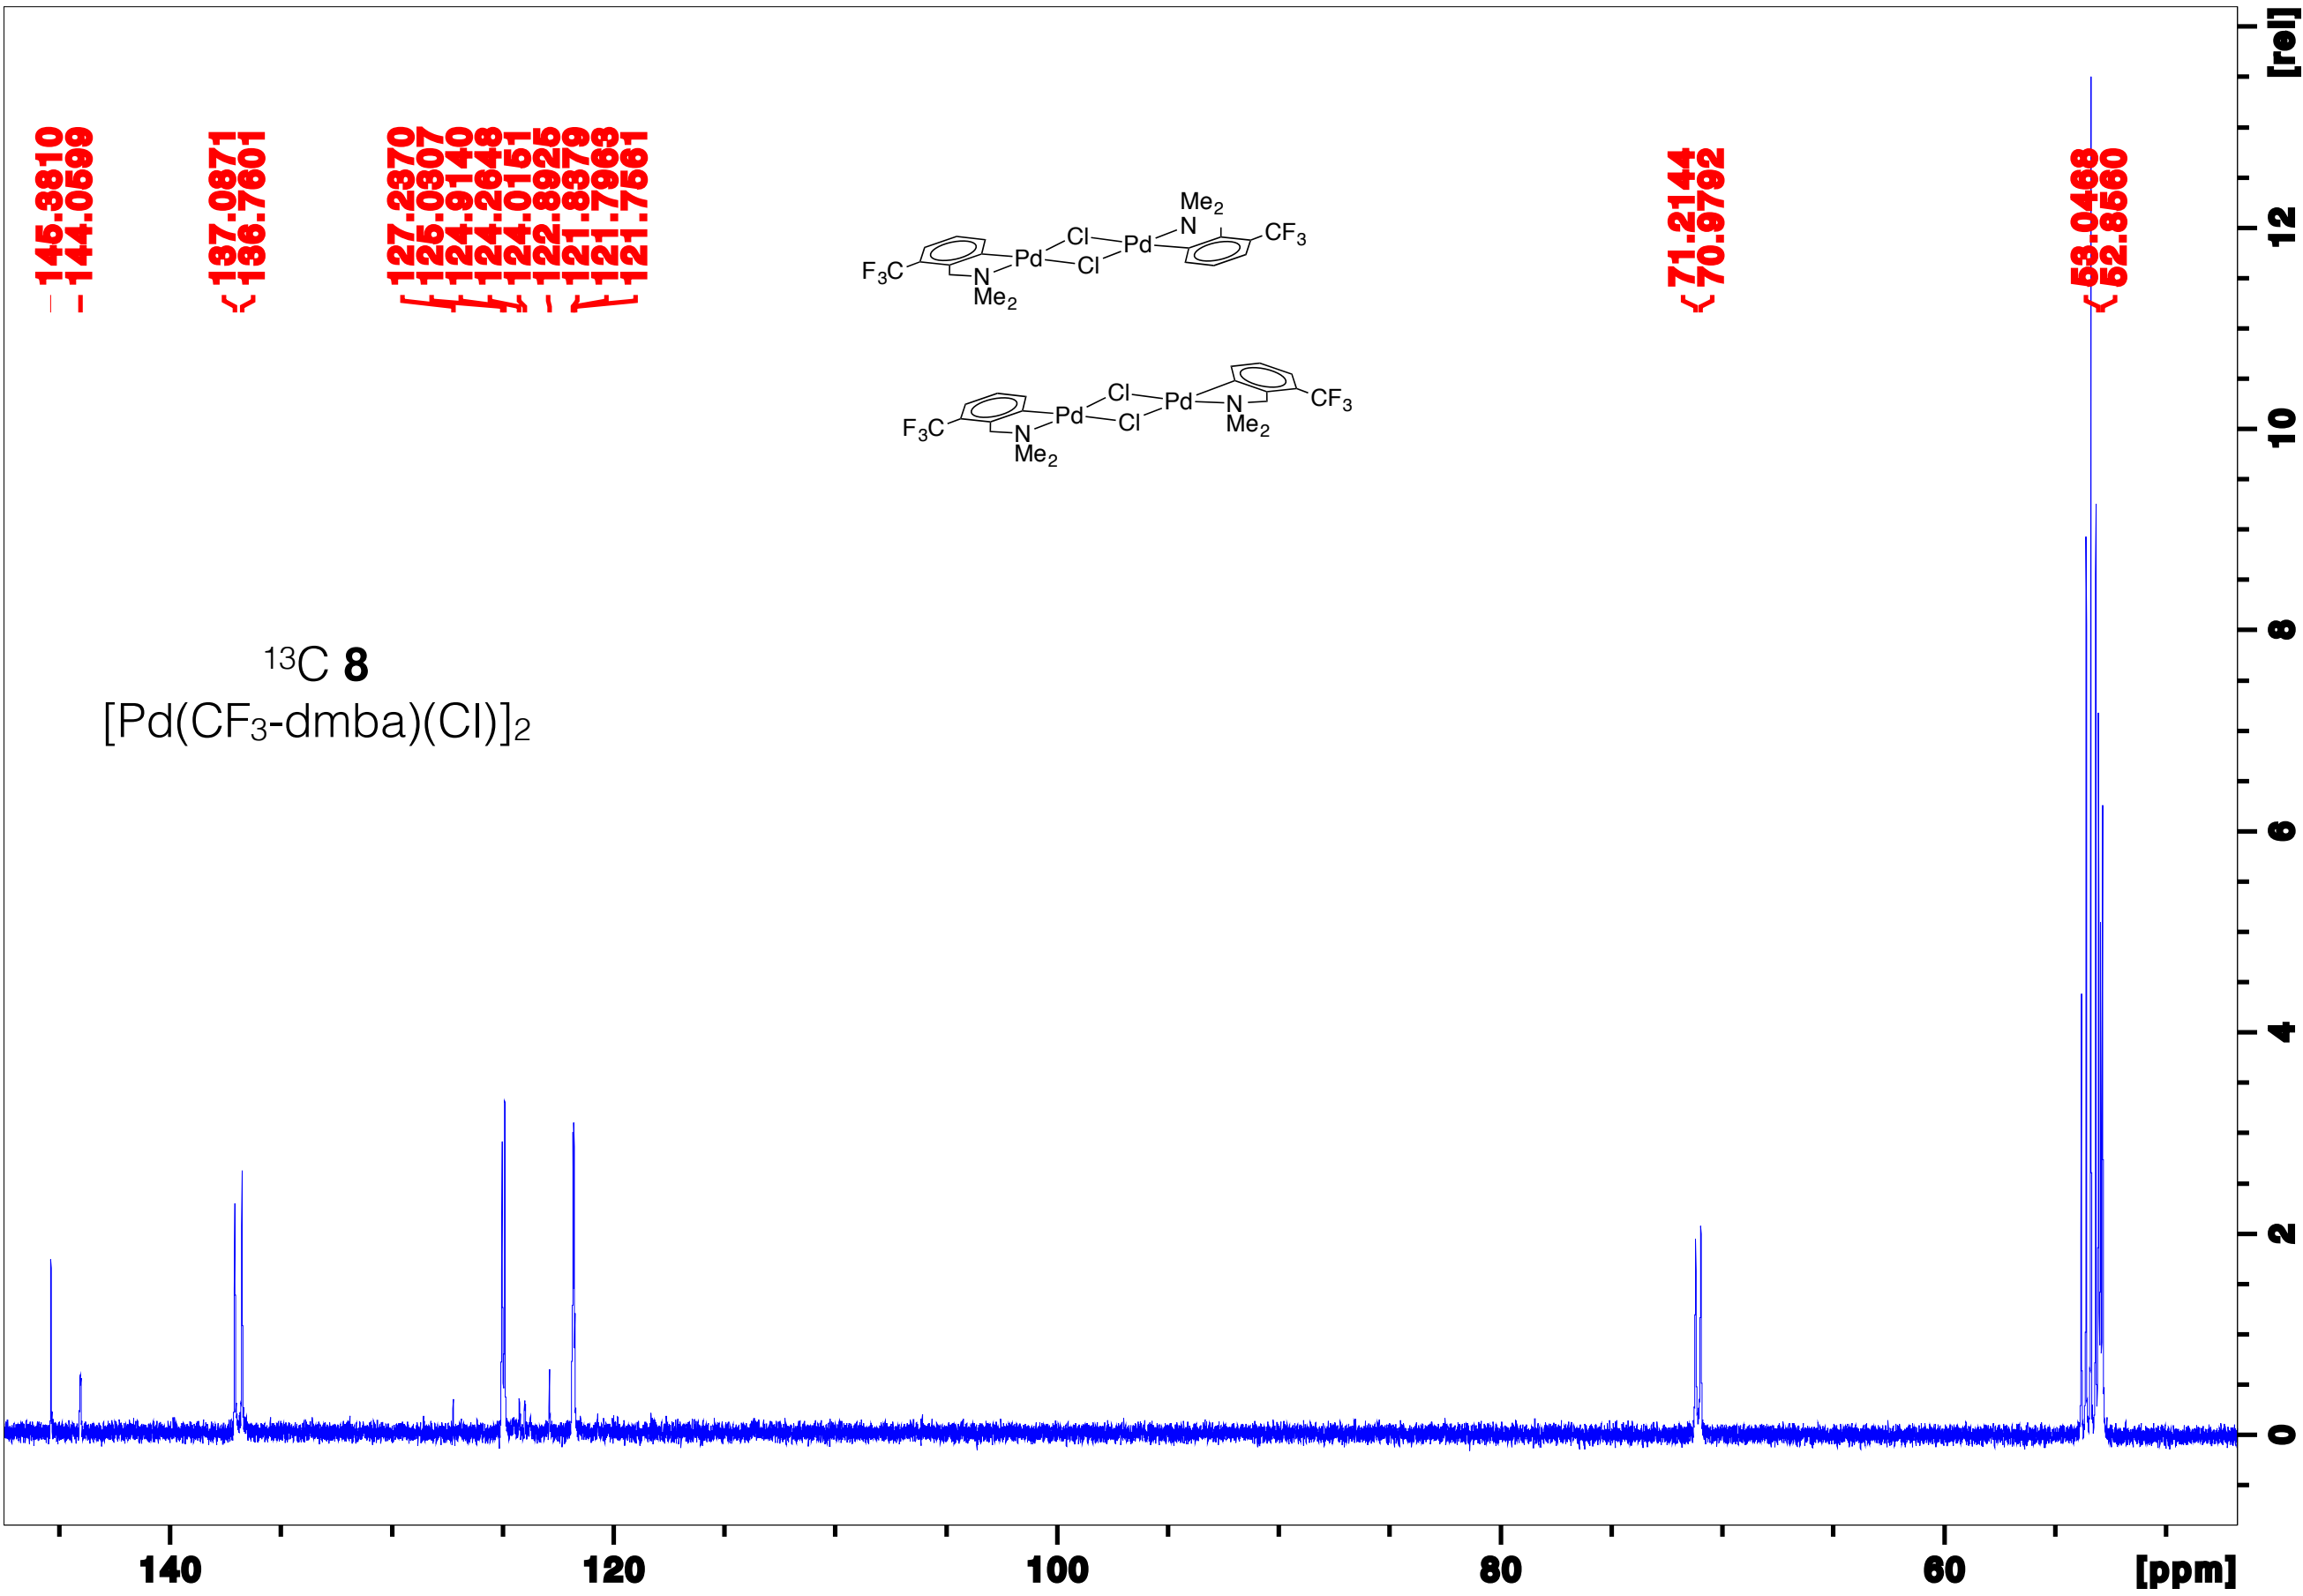

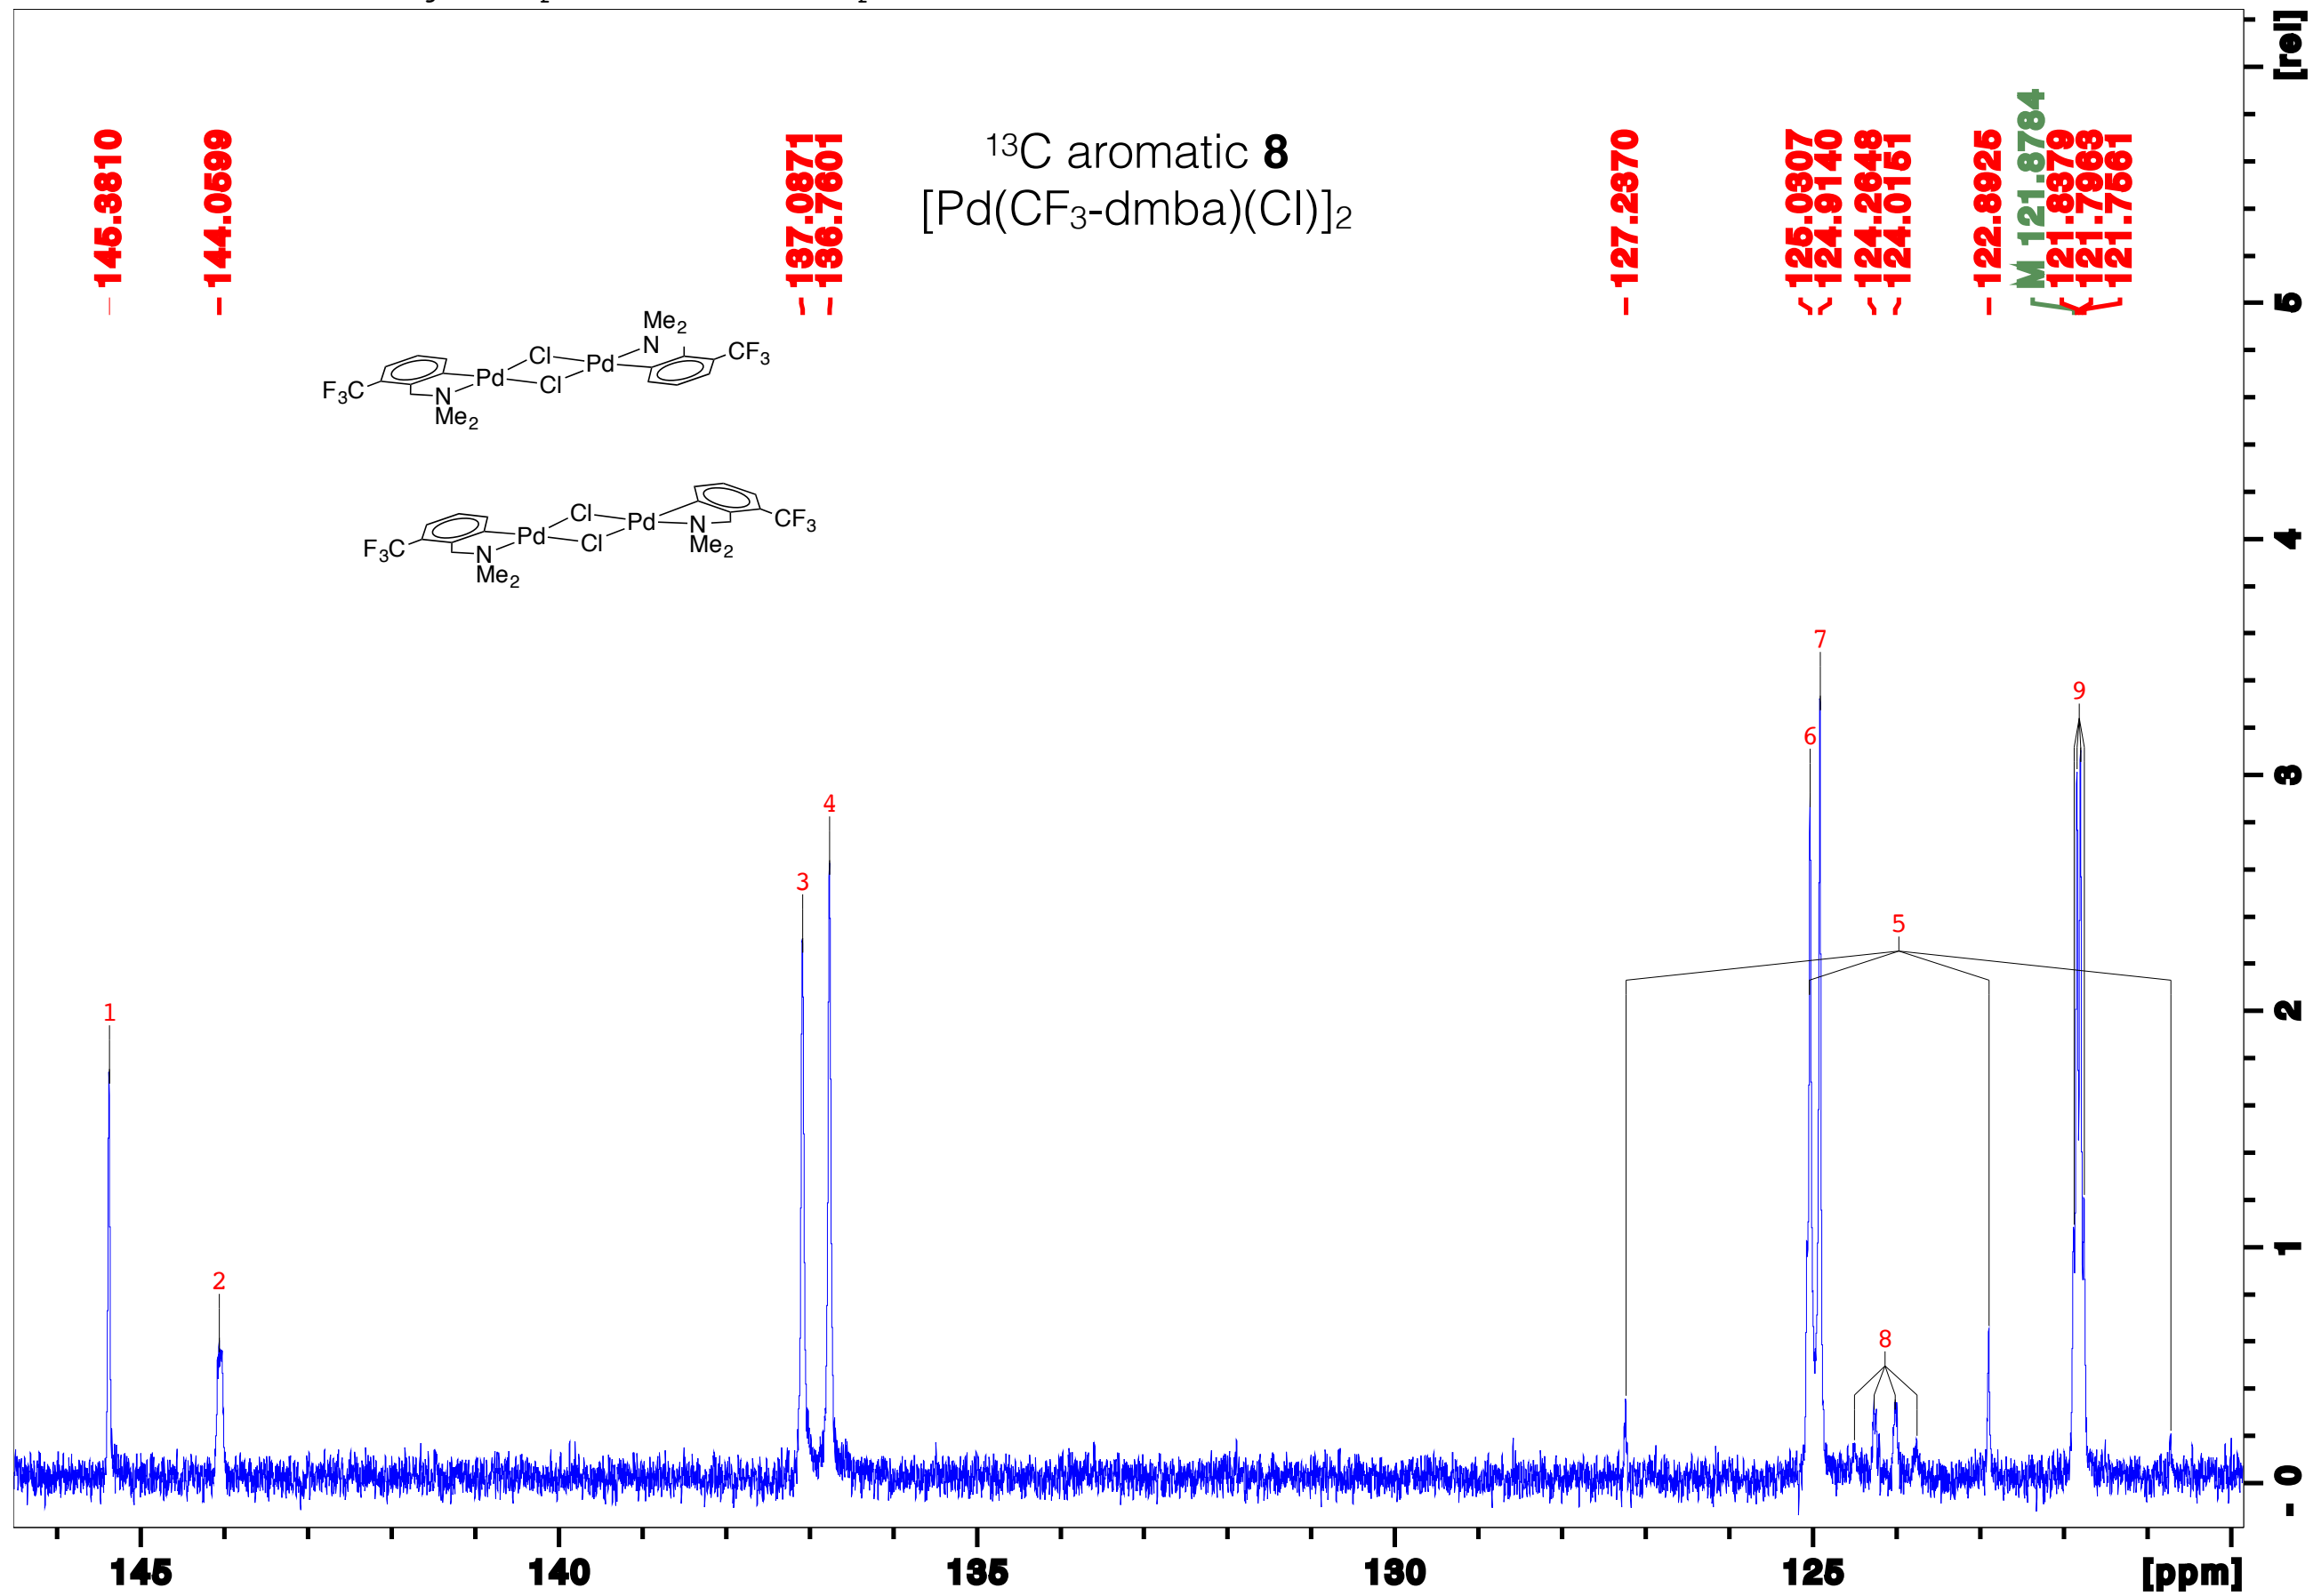

HMQC **8**  
 [Pd(CF<sub>3</sub>-dmba)(Cl)]<sub>2</sub>

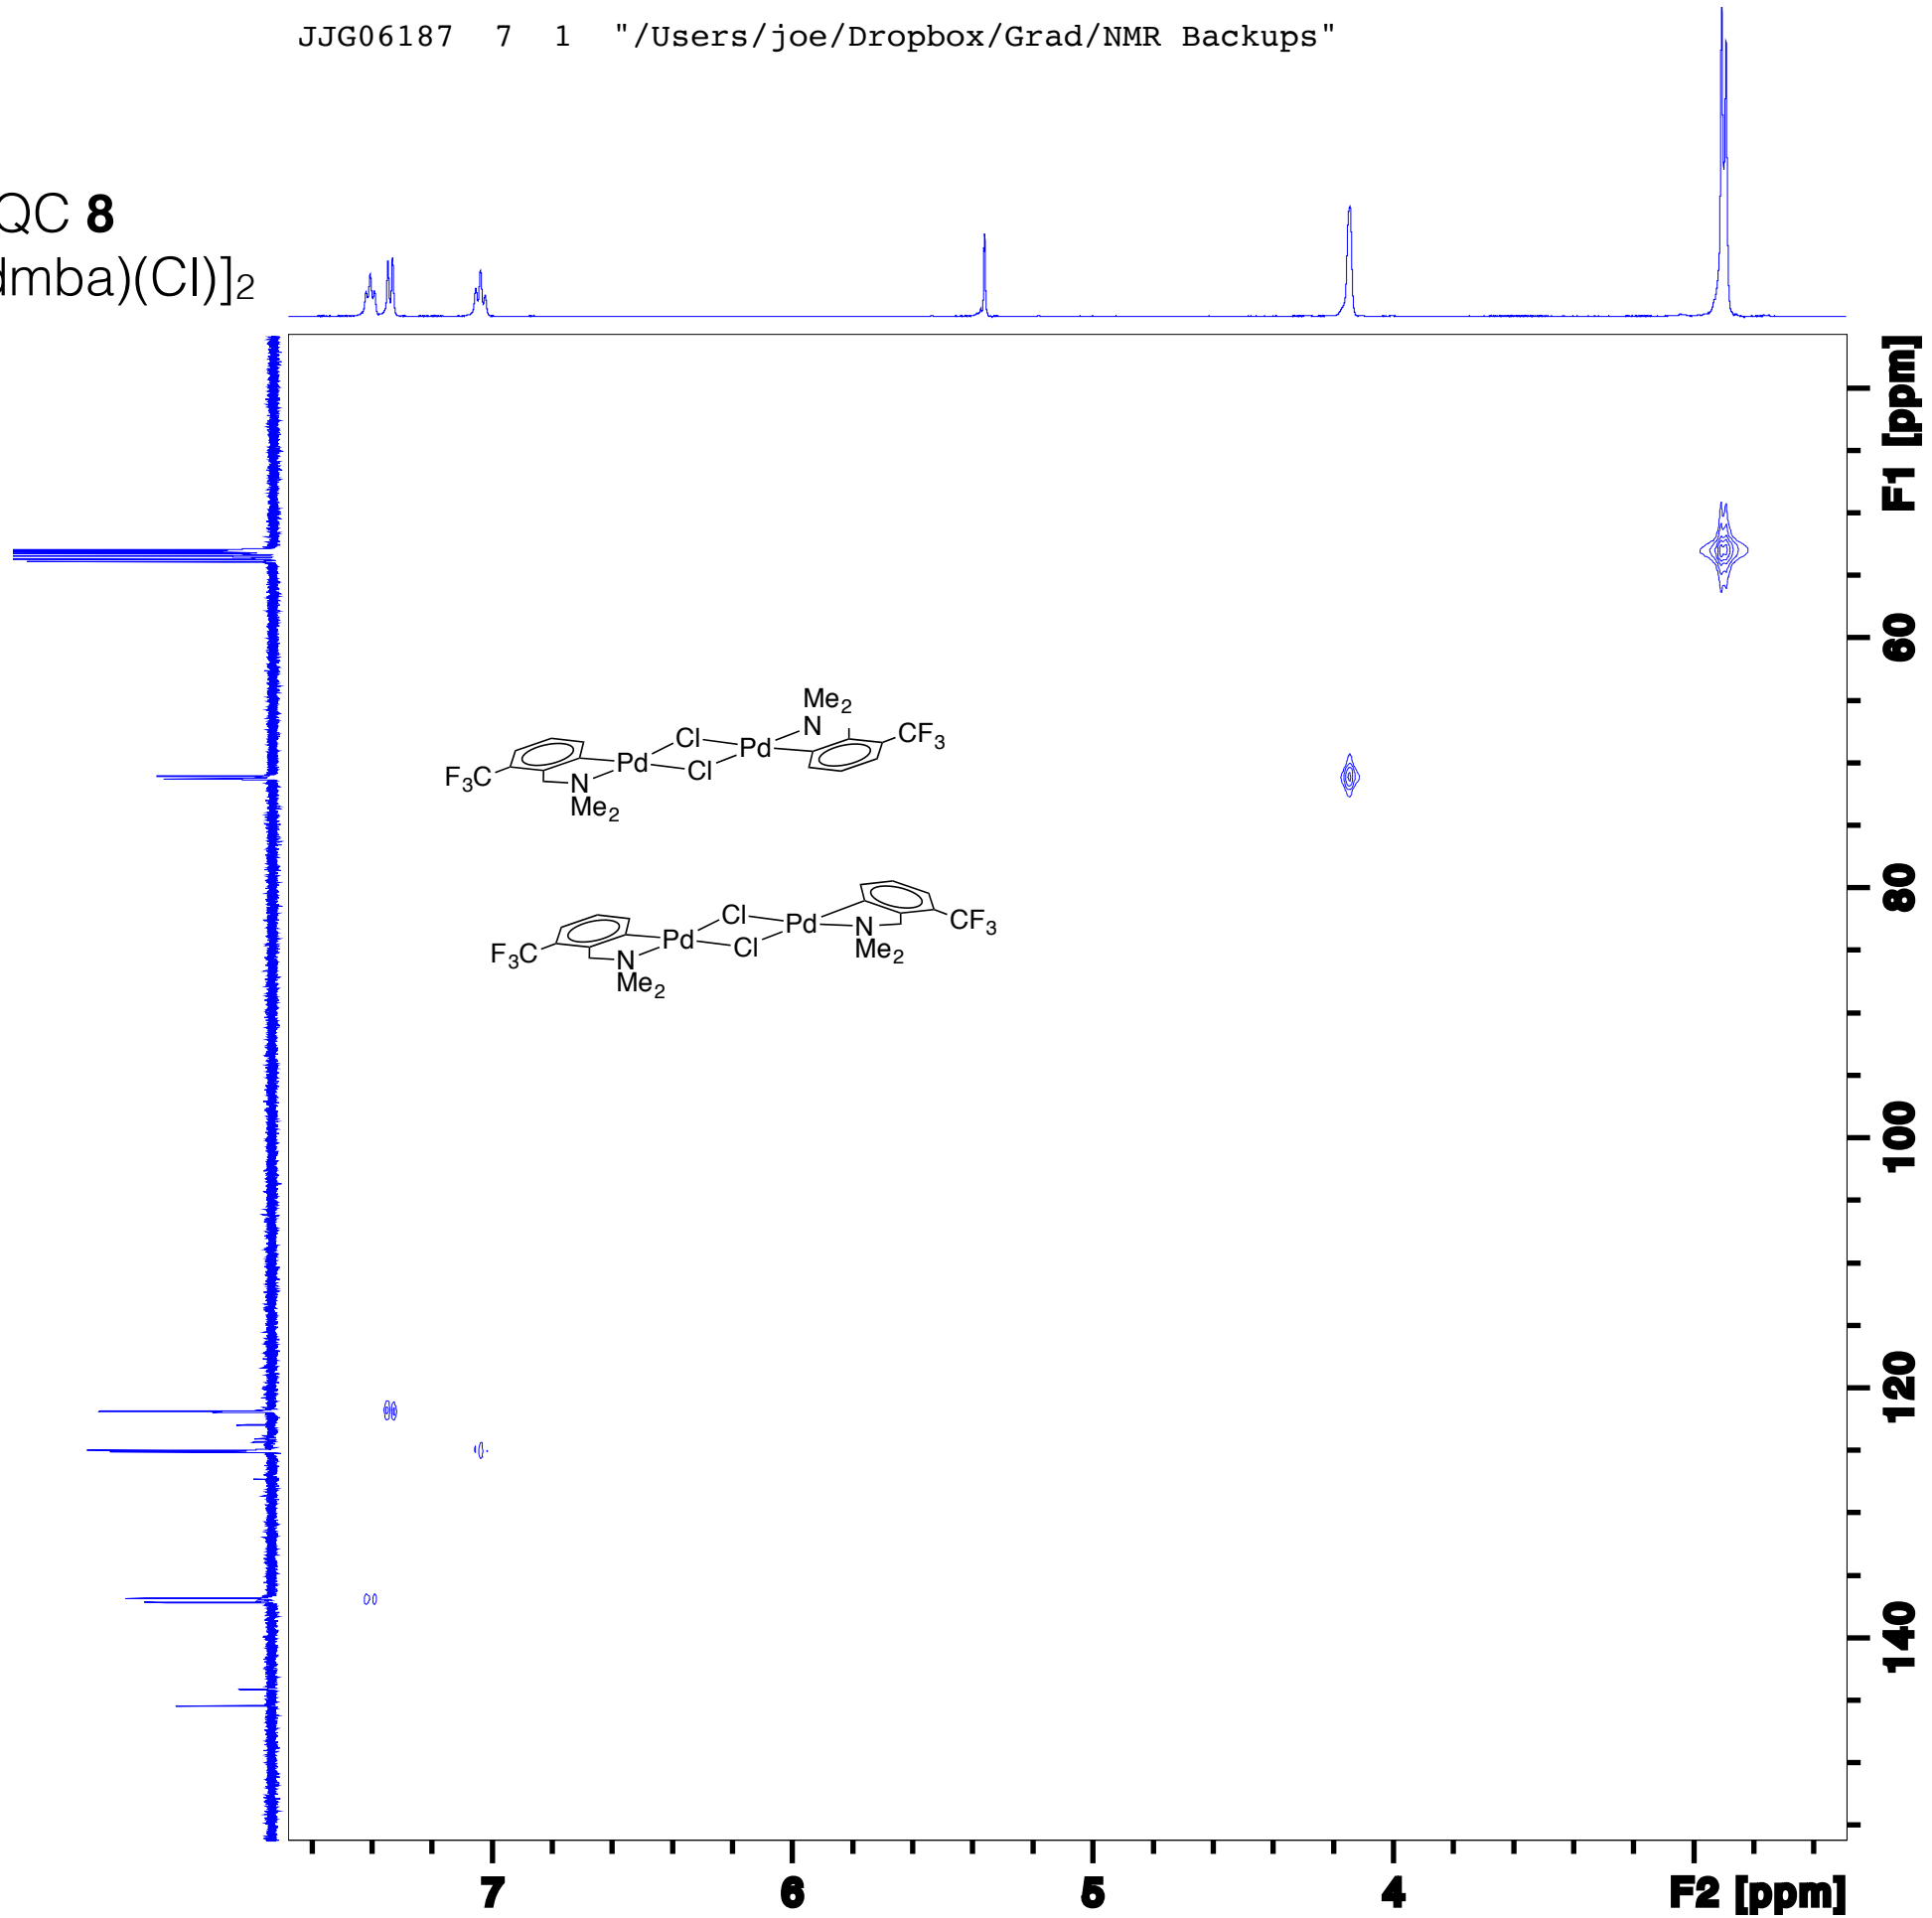



HMQC aromatic **8**  
[Pd(CF<sub>3</sub>-dmba)(Cl)]<sub>2</sub>

JJG06187 7 1 "/Users/joe/Dropbox/Grad/NMR Backups"

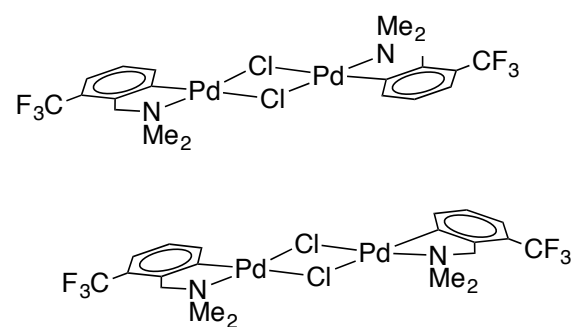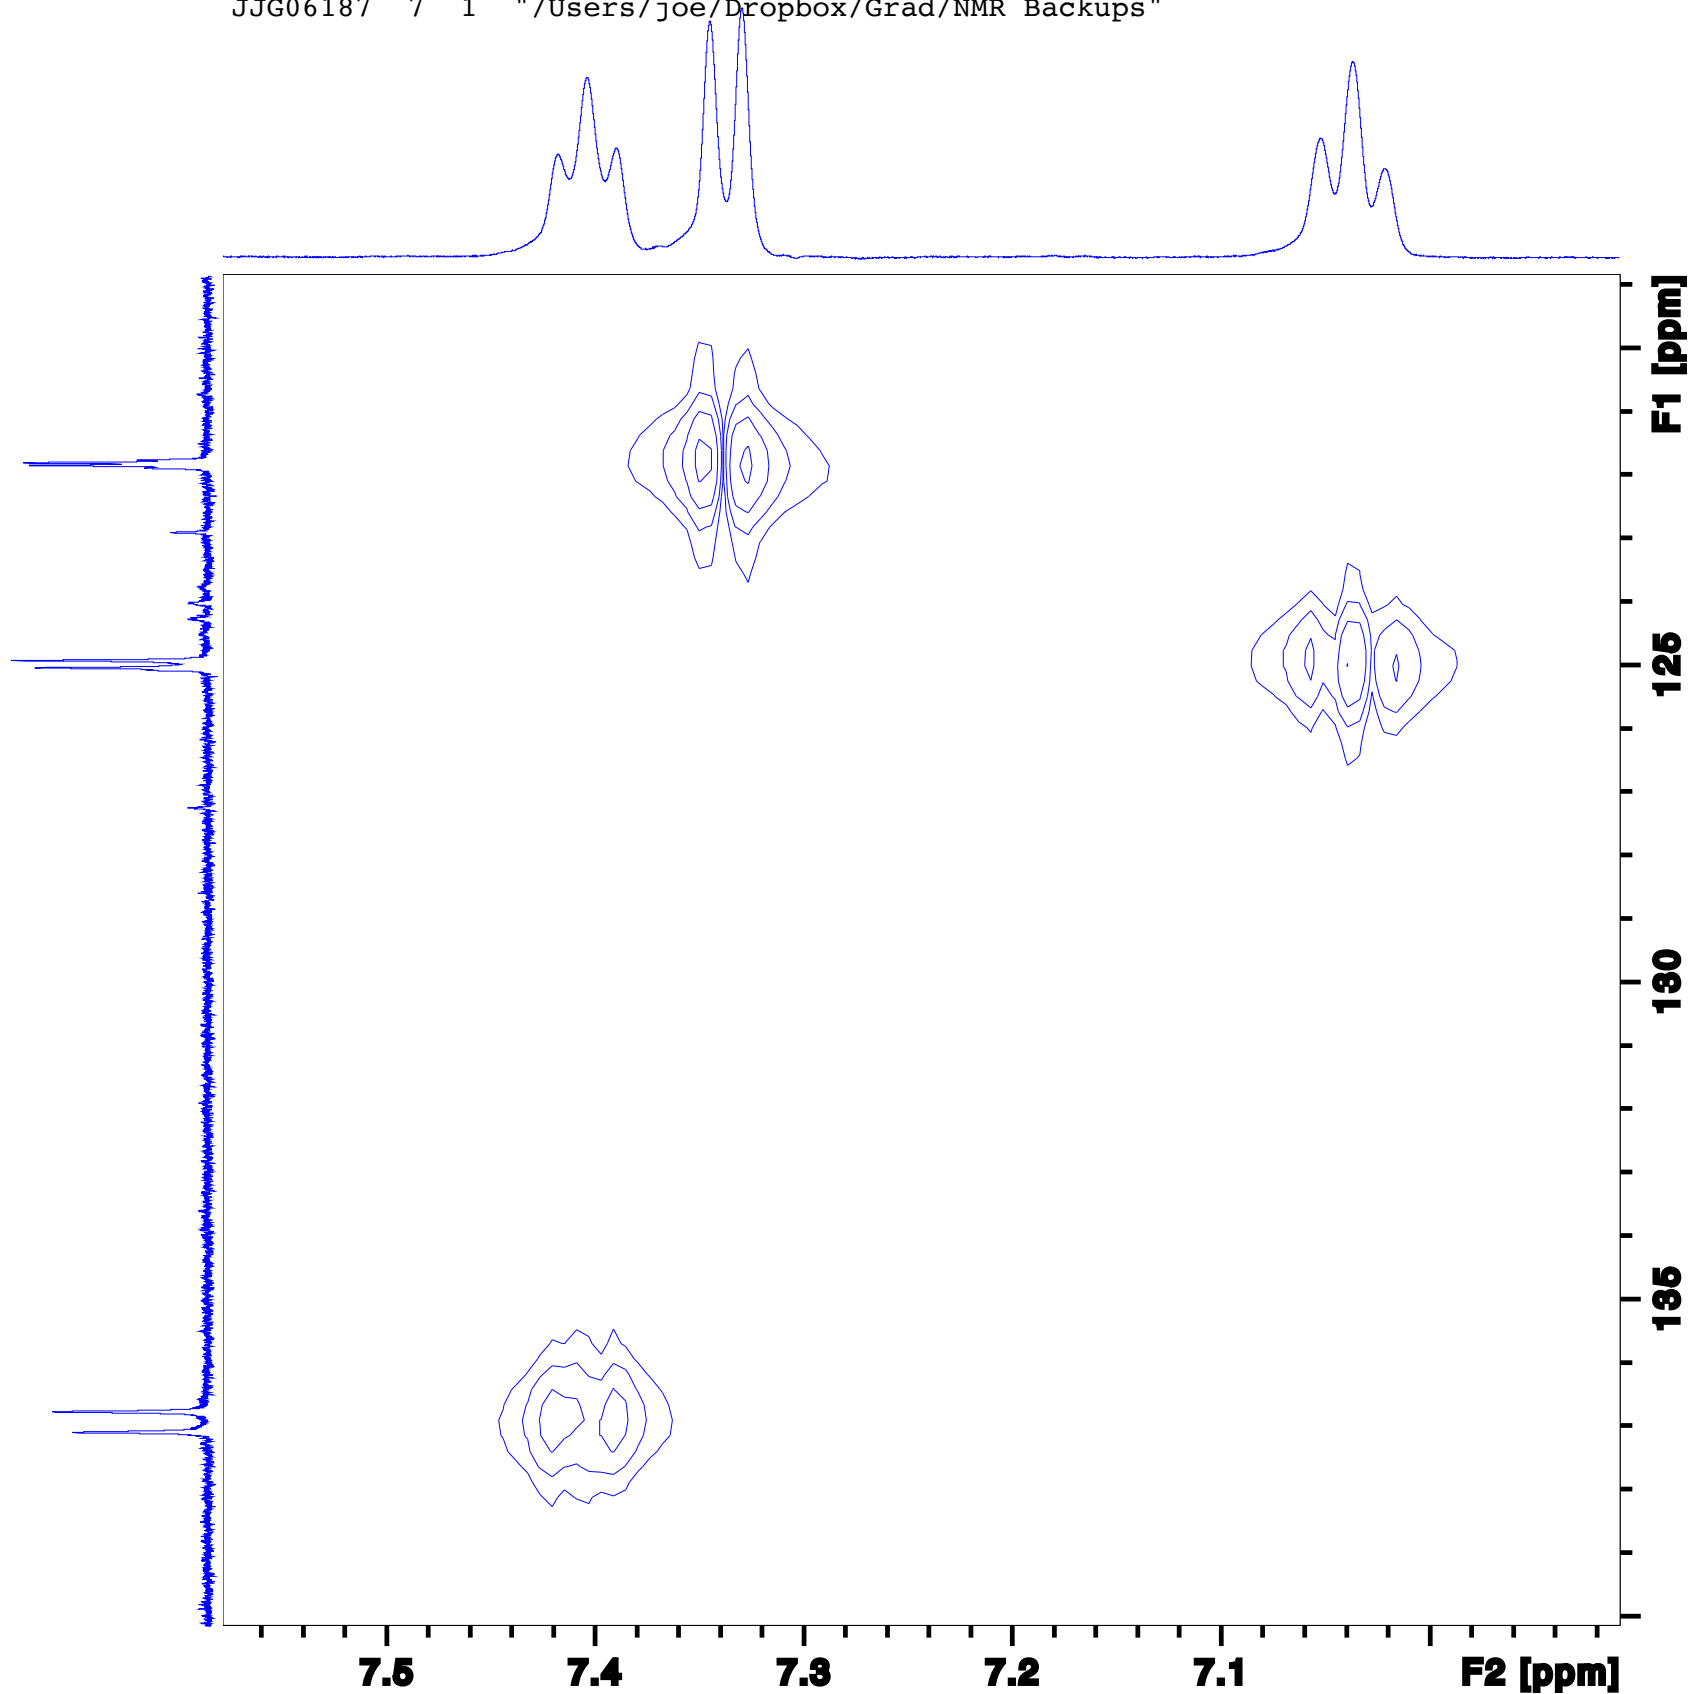

<sup>1</sup>H NMR  
Pd(CF<sub>3</sub>-dmba)(acac)

Current Data Parameters  
NAME JYG09025  
EXPNO 1  
PROCNO 1

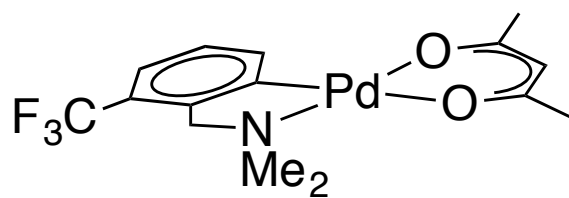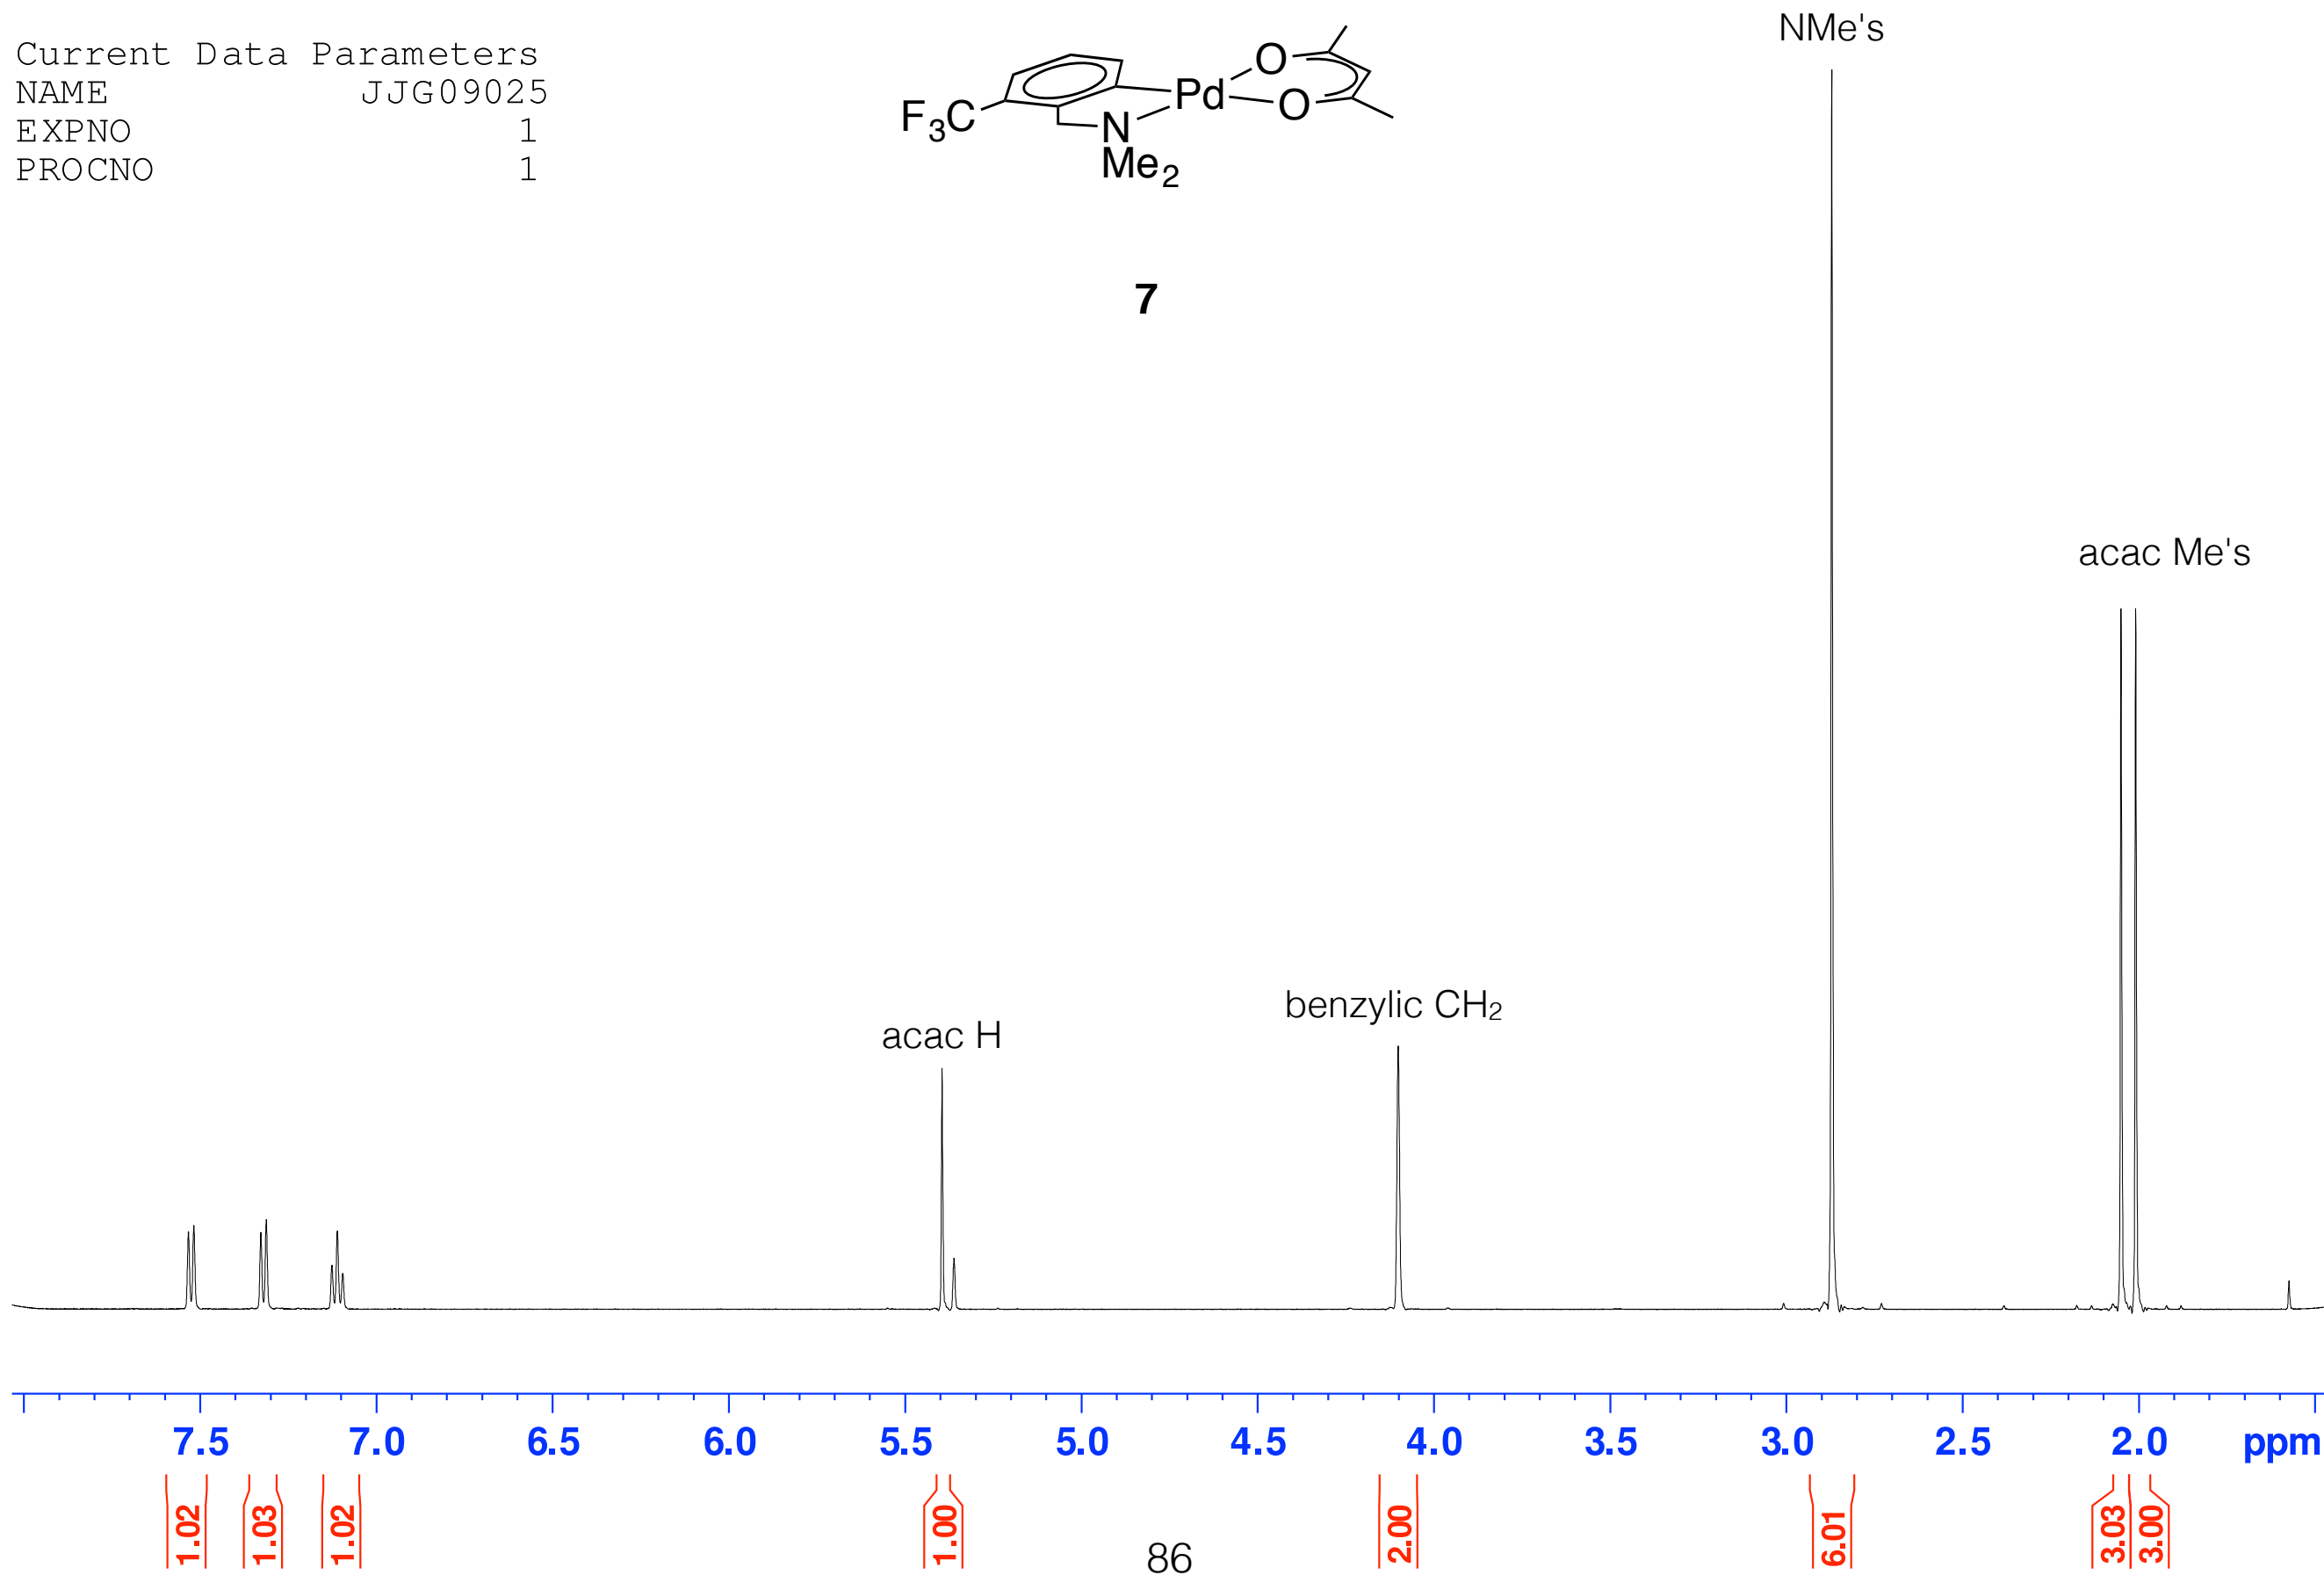

<sup>13</sup>C NMR  
Pd(CF<sub>3</sub>-dmba)(acac)

JJG09025 2 1 "/Users/joe/Dropbox/Grad/NMR Backups"

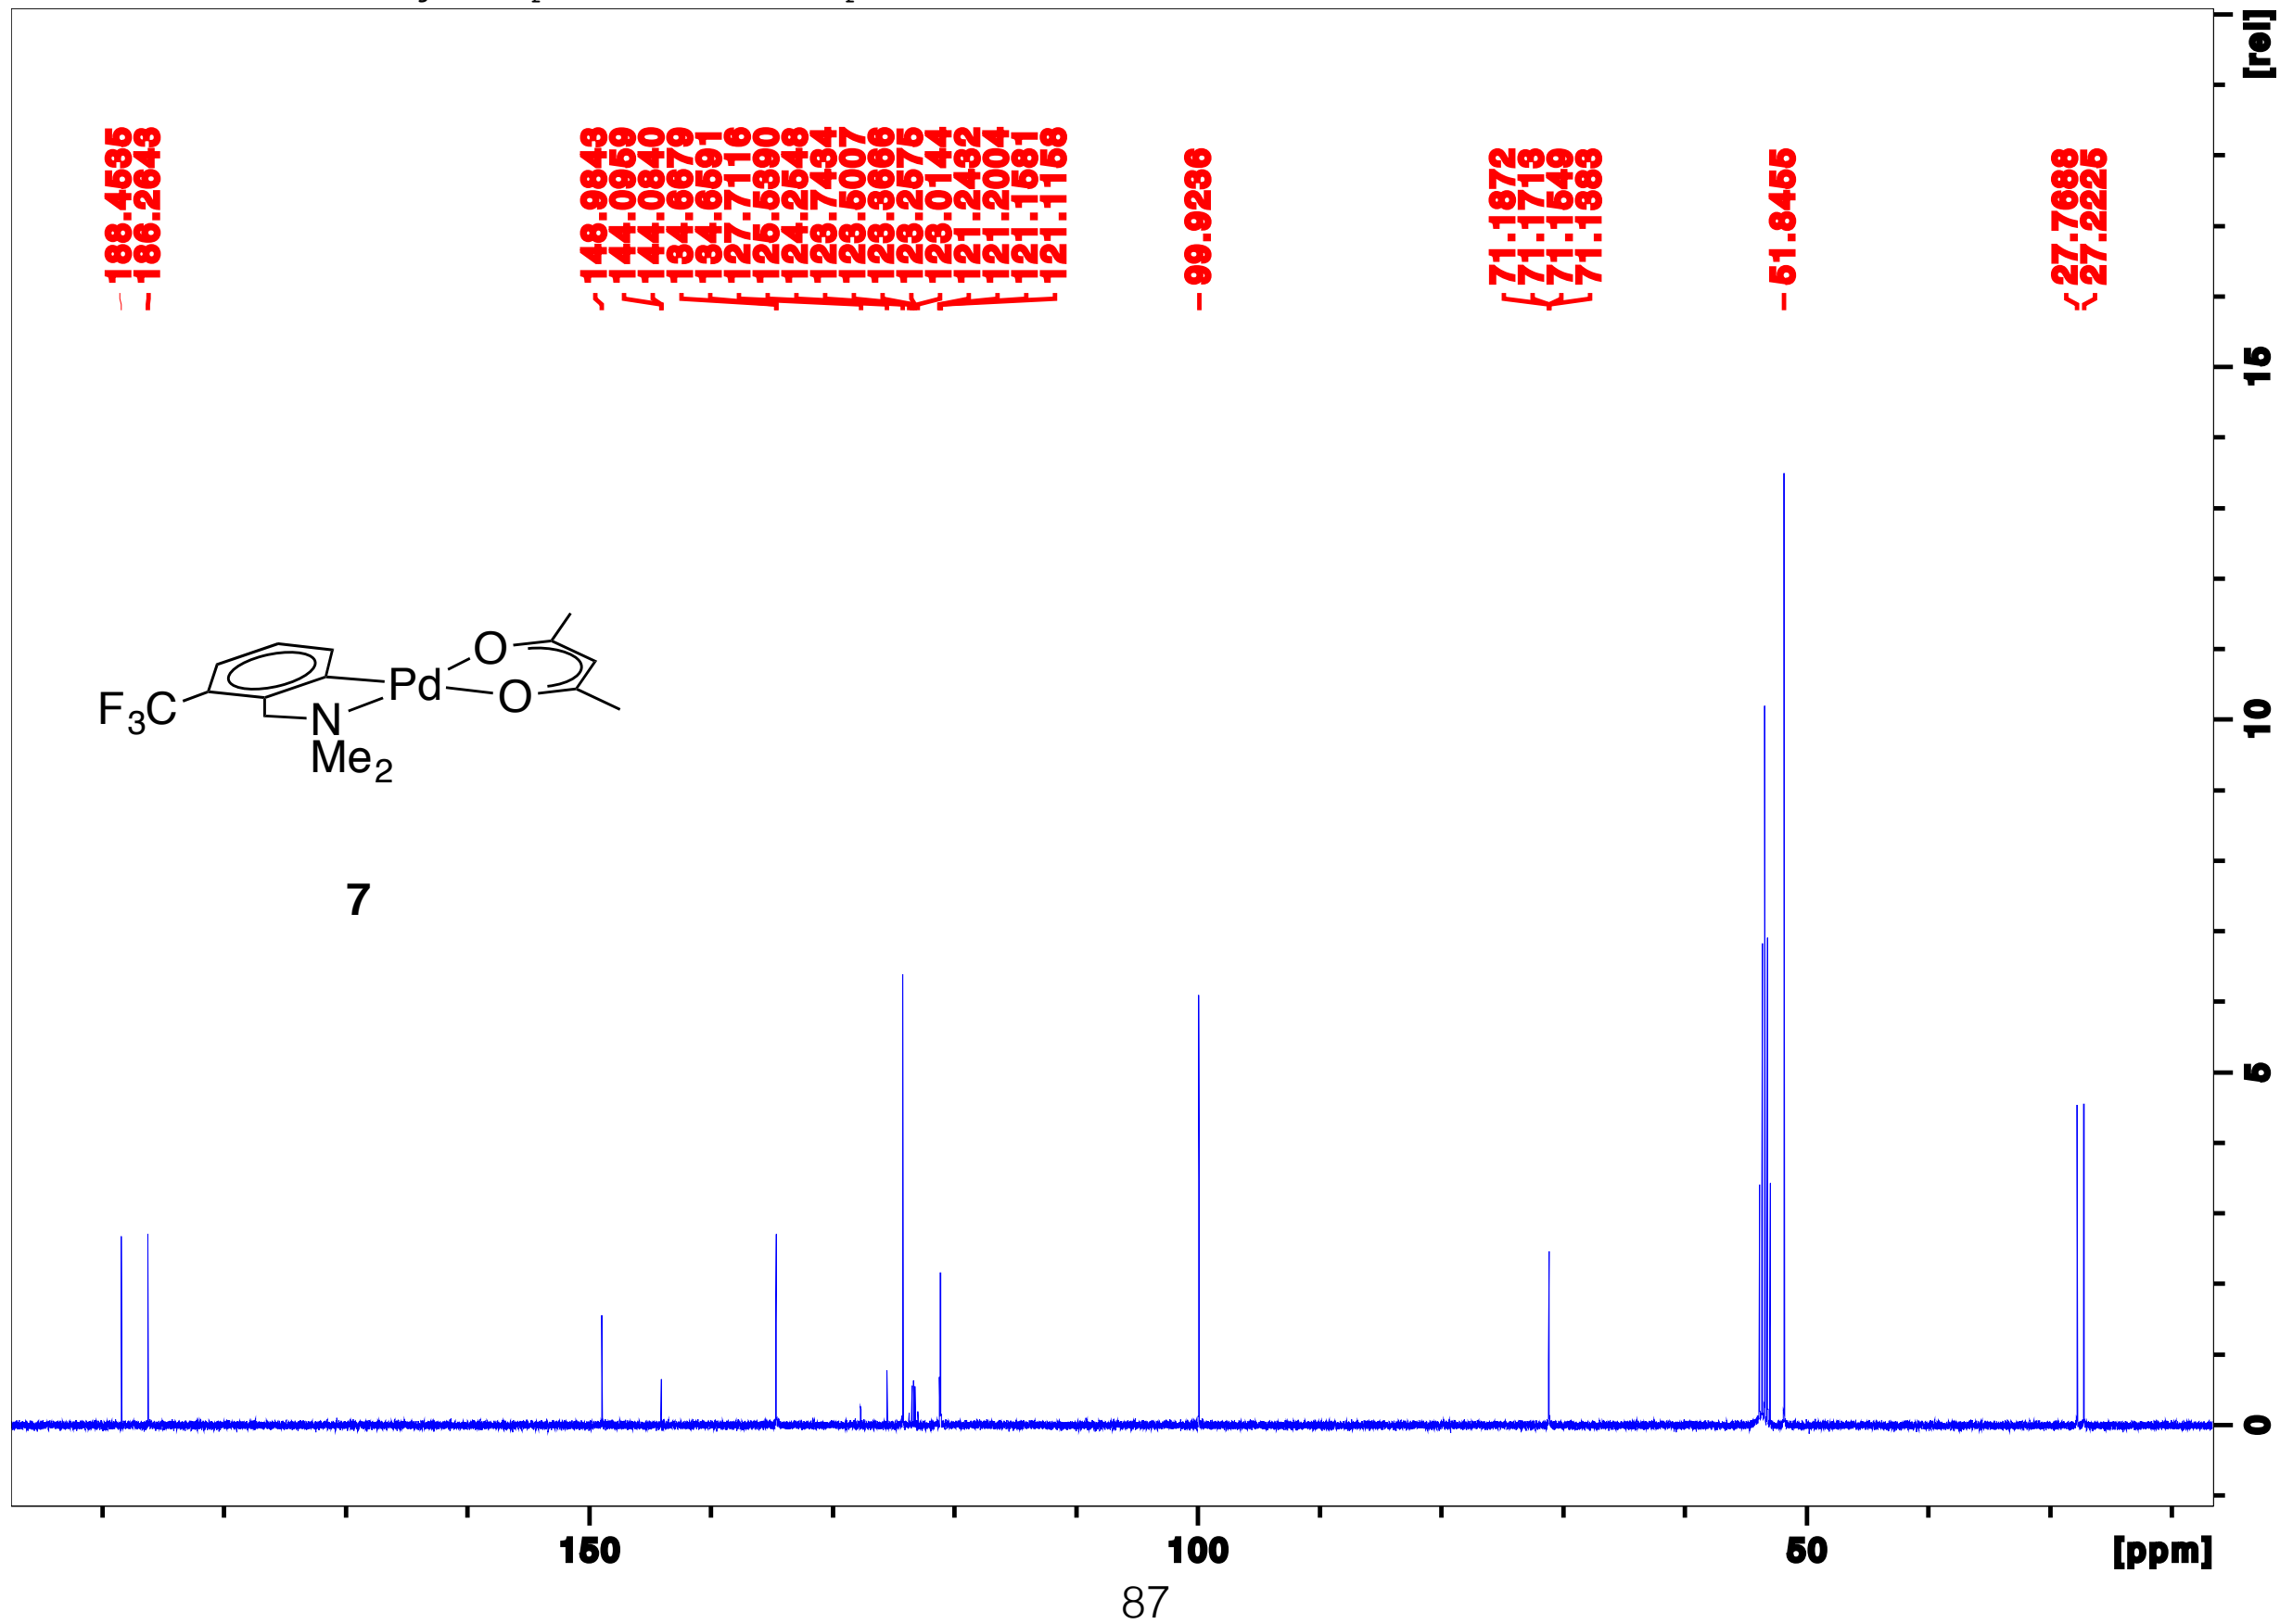

<sup>13</sup>C NMR aromatic region  
Pd(CF<sub>3</sub>-dmba)(acac)

JJG09025 2 1 "/Users/joe/Dropbox/Grad/NMR Backups"

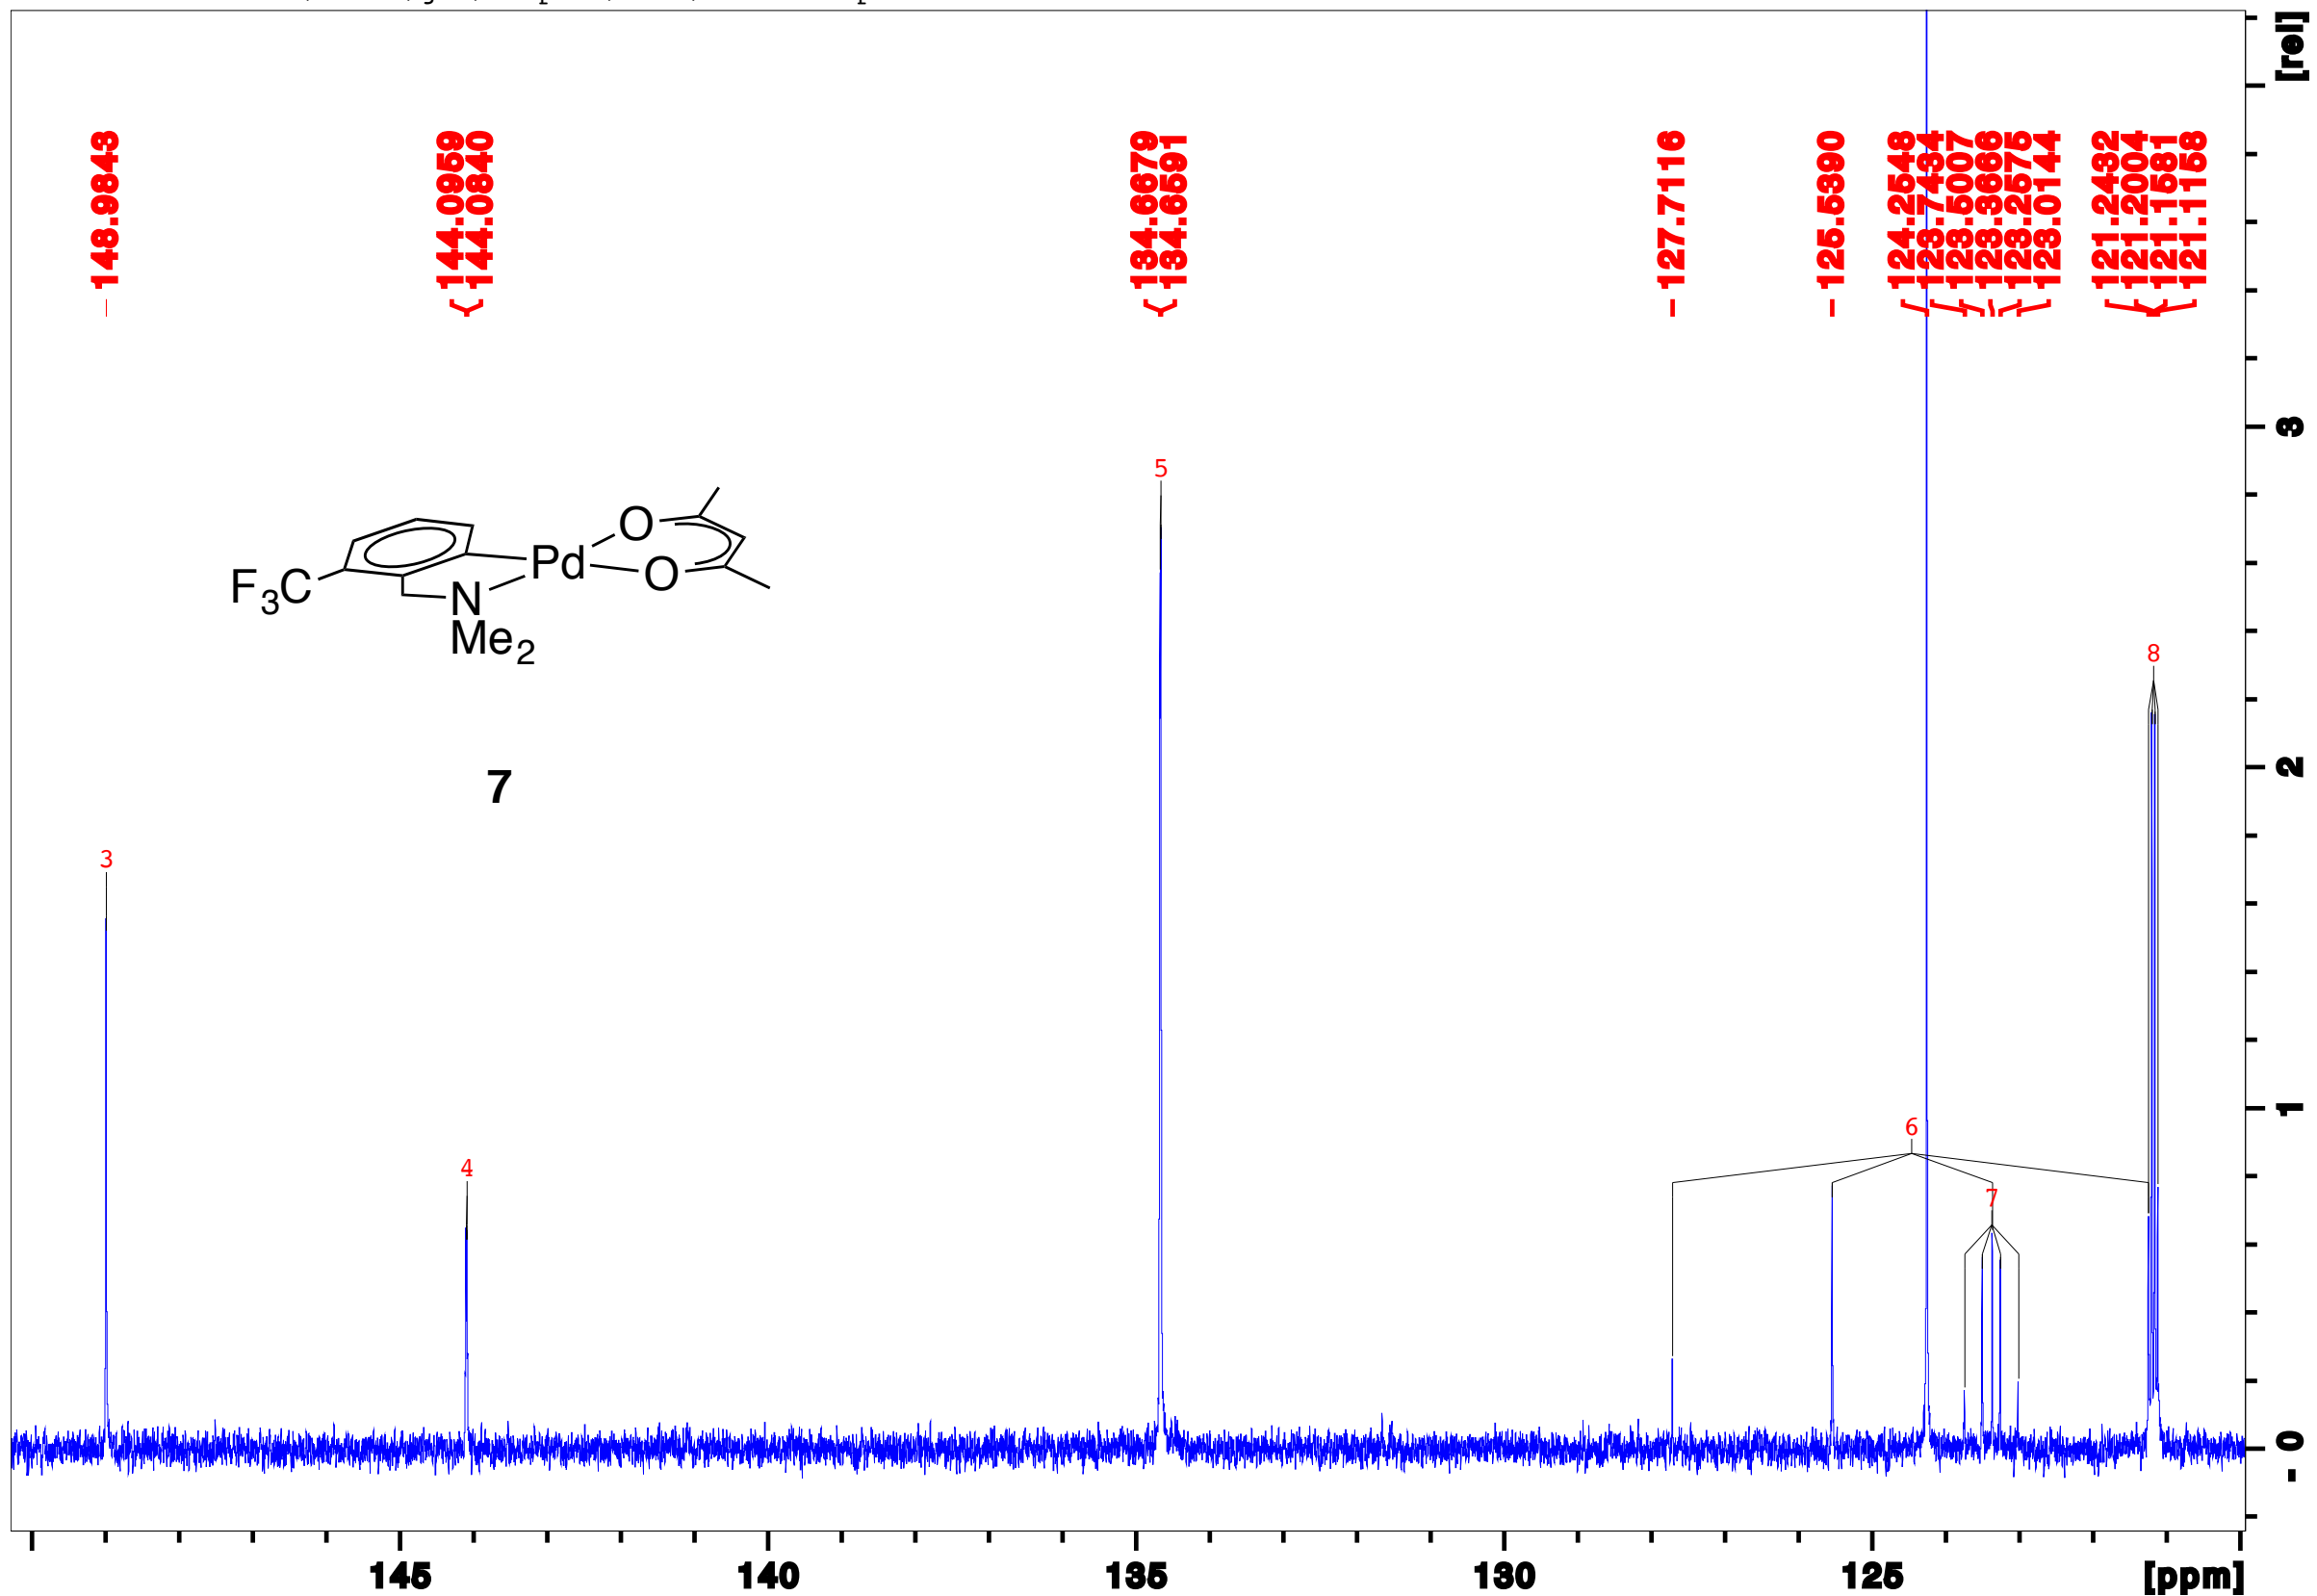

<sup>13</sup>C HMQC  
Pd(CF<sub>3</sub>-dmba)(acac)

JJG09025 3 1 "/Users/joe/Dropbox/Grad/NMR Backups"

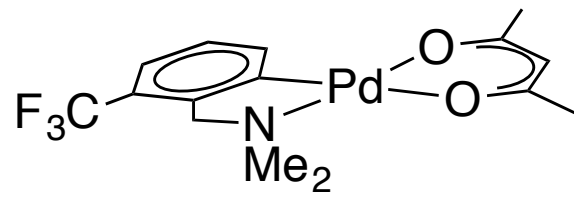

7

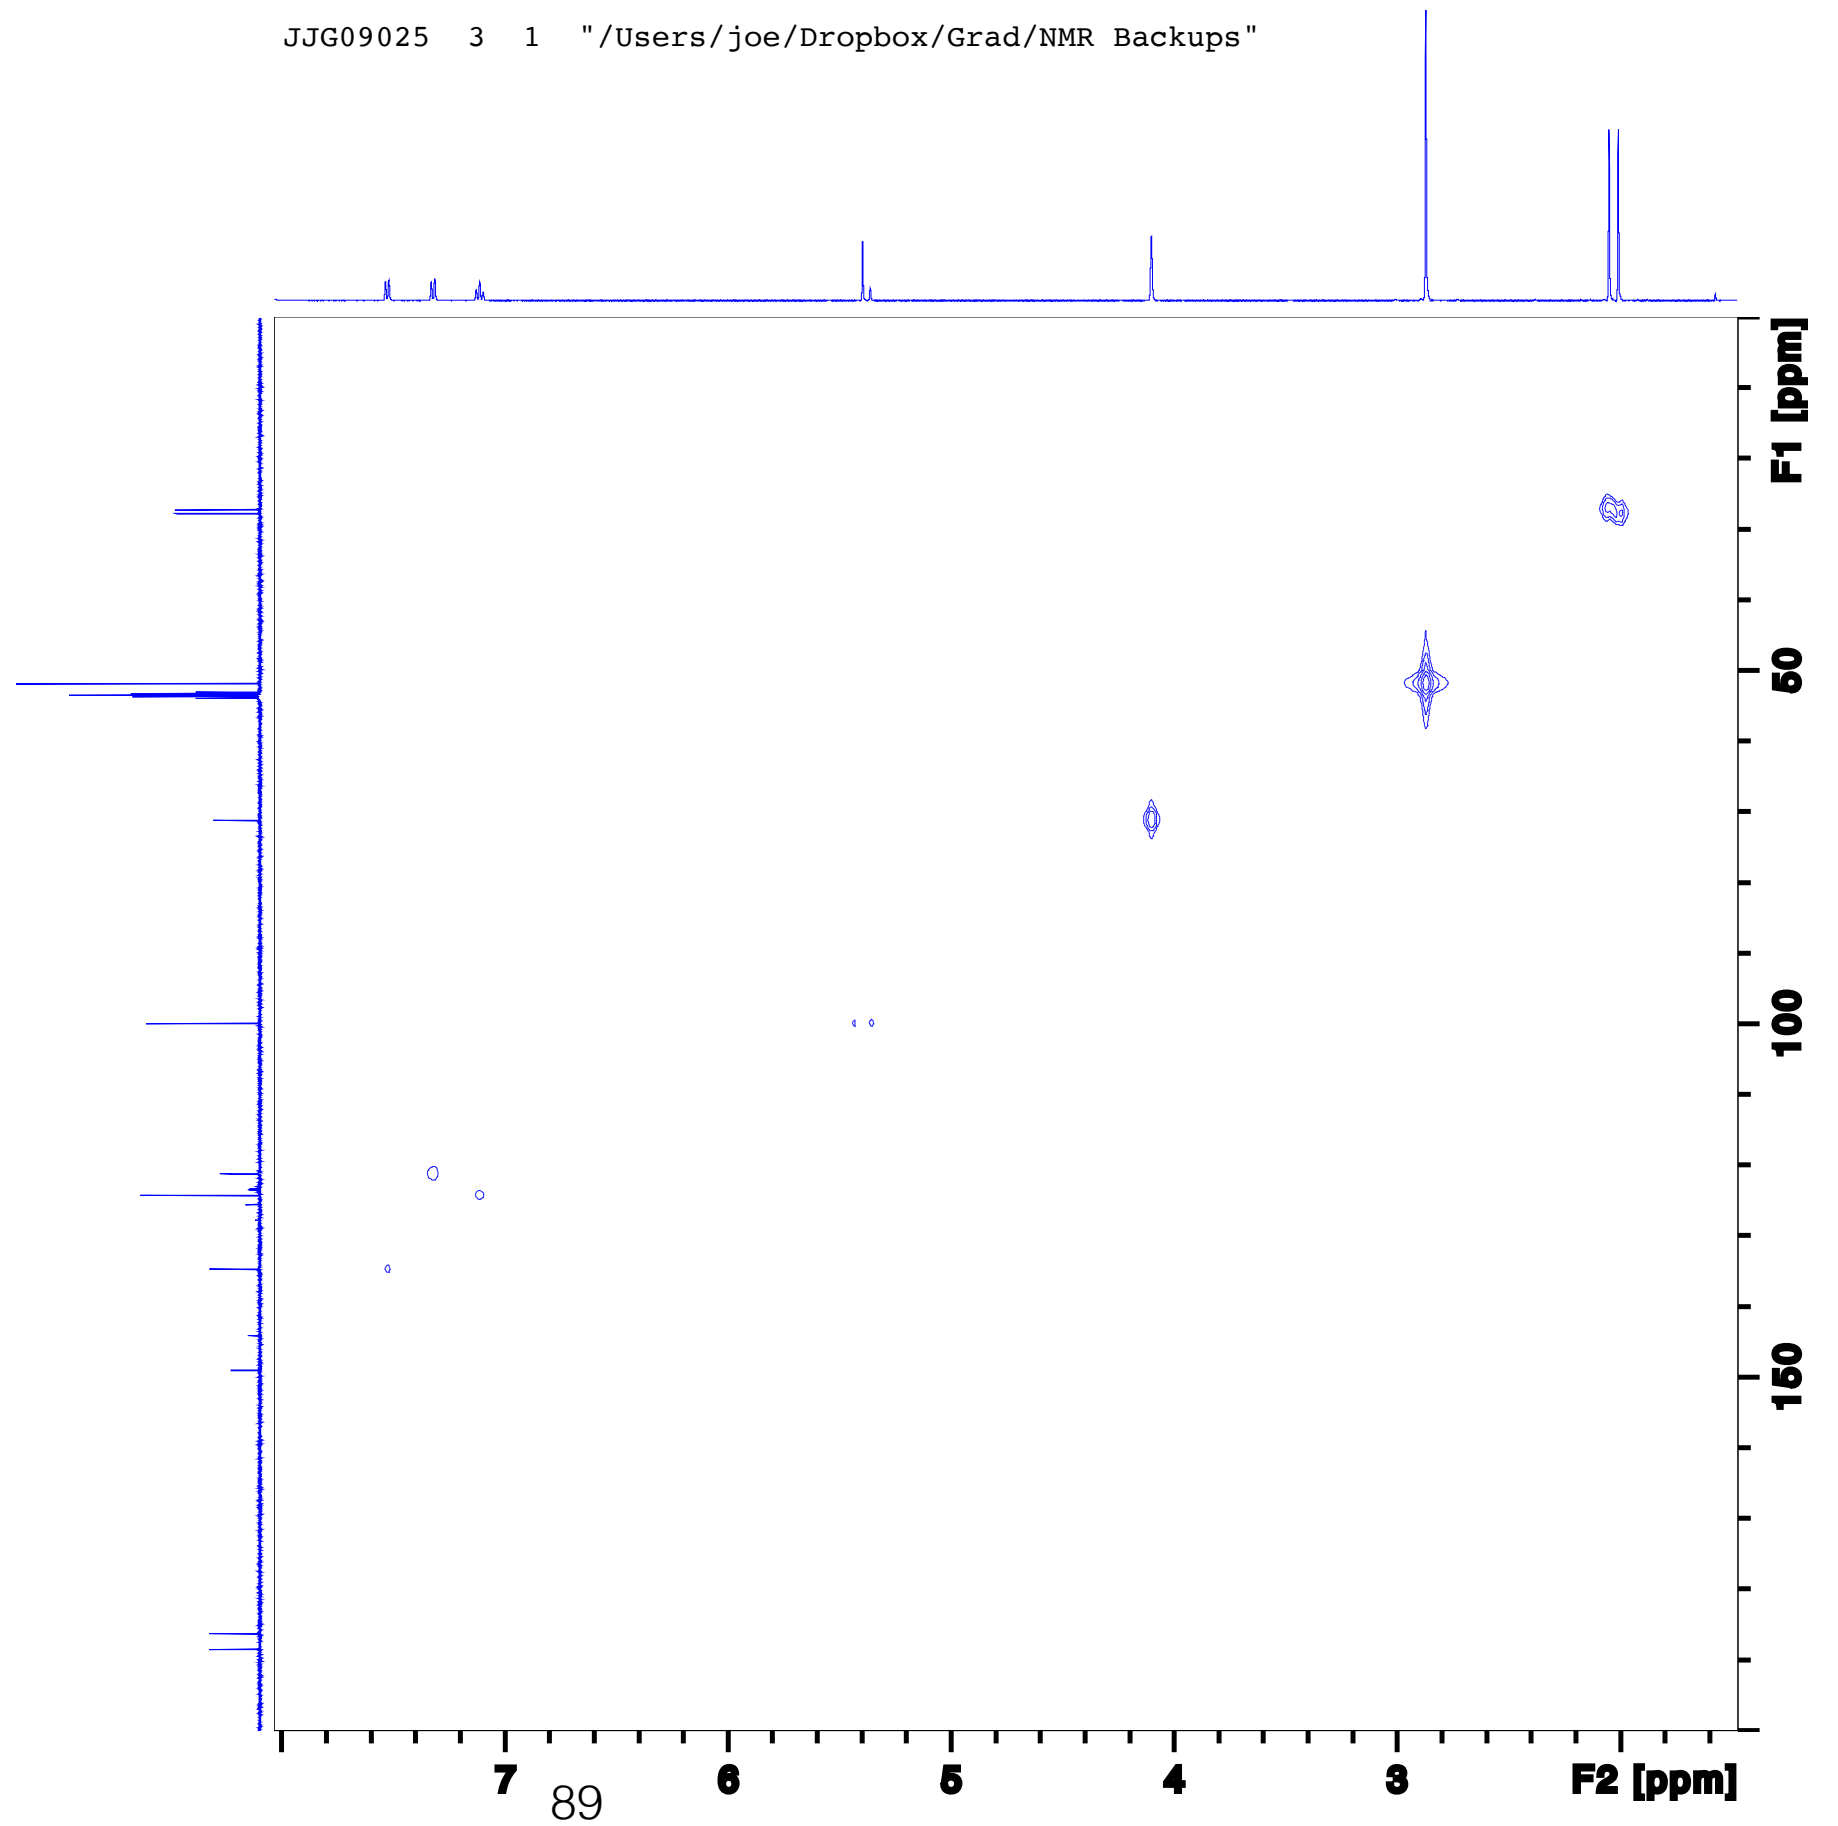

<sup>13</sup>C HMQC aromatic region  
Pd(CF<sub>3</sub>-dmba)(acac)

JJG09025 3 1 "/Users/joe/Dropbox/Grad/NMR Backups"

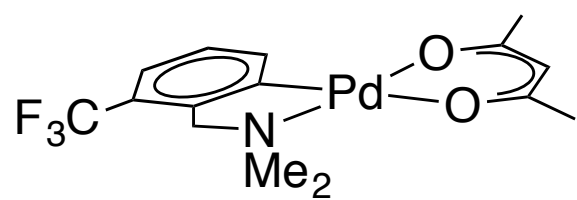

**7**

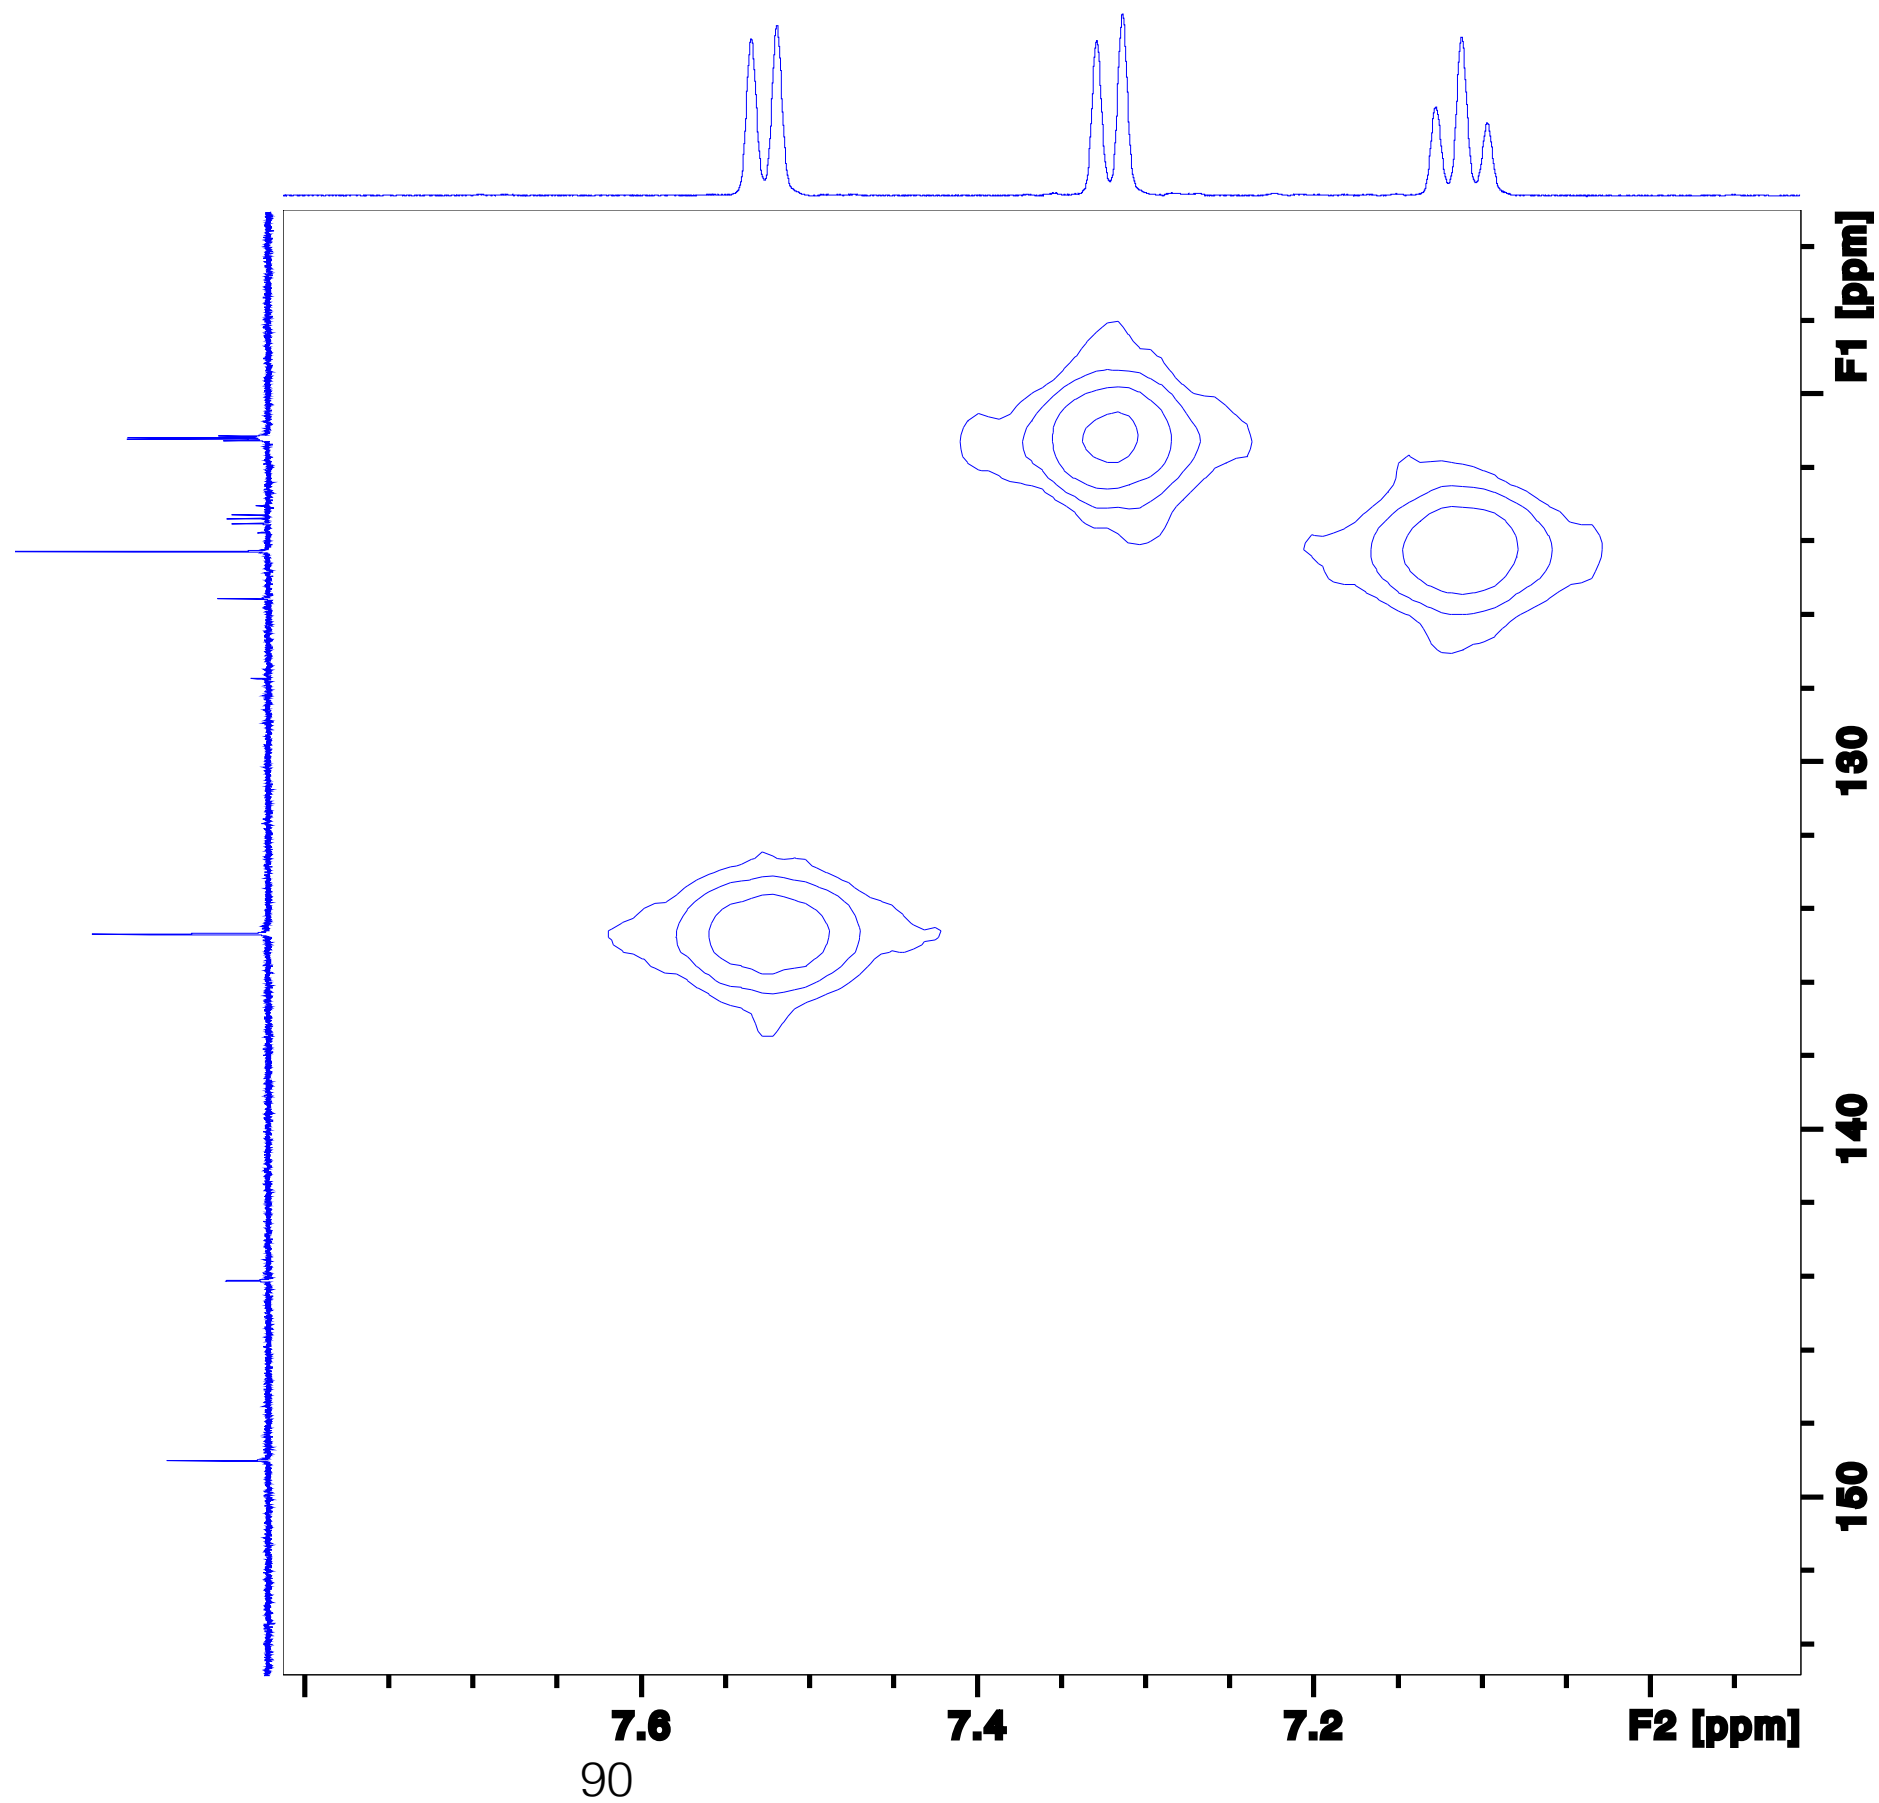

<sup>19</sup>F NMR  
Pd(CF<sub>3</sub>-dmba)(acac)

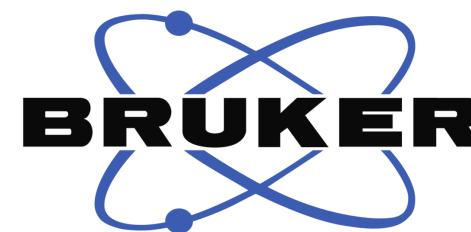

Current Data Parameters  
NAME JYG07009  
EXPNO 4  
PROCNO 1

F2 - Acquisition Parameter  
Date\_ 20160610  
Time 14.52  
INSTRUM spect  
PROBHD 5 mm PABBO BB/  
PULPROG zgflqn  
TD 524288  
SOLVENT CD2Cl2  
NS 8  
DS 0  
SWH 117187.500 Hz  
FIDRES 0.223517 Hz  
AQ 2.2369621 sec  
RG 554.84  
DW 4.267 usec  
DE 6.50 usec  
TE 295.6 K  
D1 3.00000000 sec  
TD0 1

==== CHANNEL f1 =====  
SFO1 470.3181011 MHz  
NUC1 19F  
P1 15.00 usec  
PLW1 37.79999924 W

F2 - Processing parameters  
SI 262144  
SF 470.3477328 MHz  
WDW EM  
SSB 0  
LB 2.00 Hz  
GB 0  
PC 1.00

-61.541

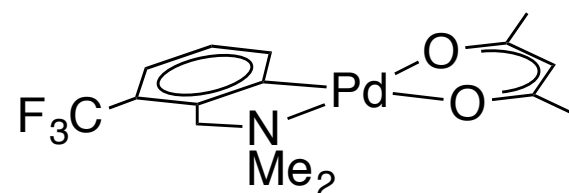

7

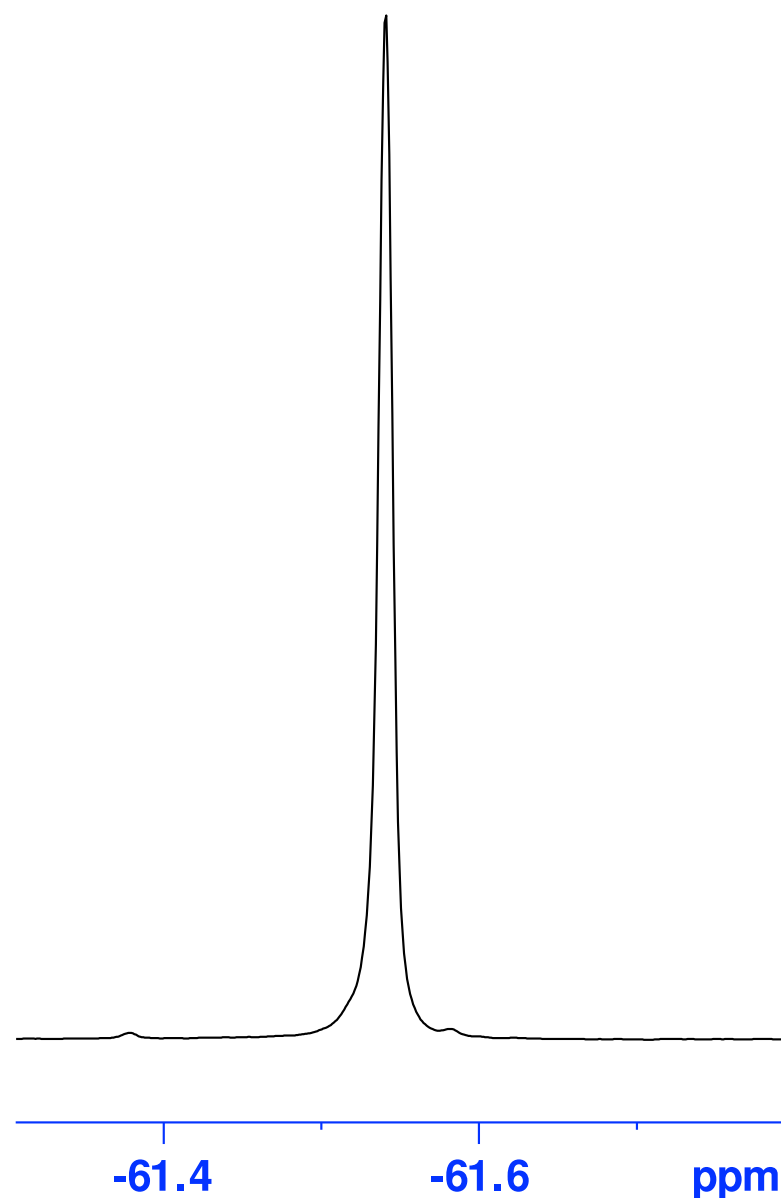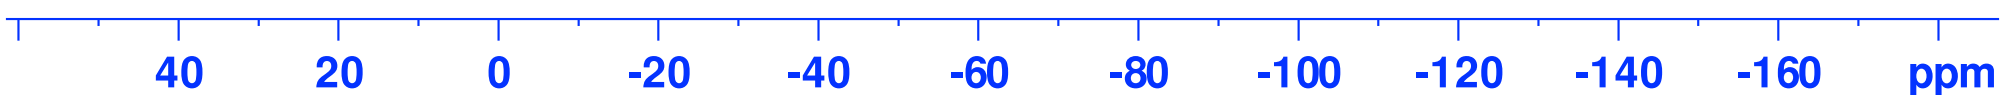

<sup>1</sup>H NMR  
**5b**

7.622  
7.606  
7.353  
7.336  
7.321

Current Data Parameters  
NAME JYG07178  
EXPNO 1  
PROCNO 1

3.701

2.309

**5b**

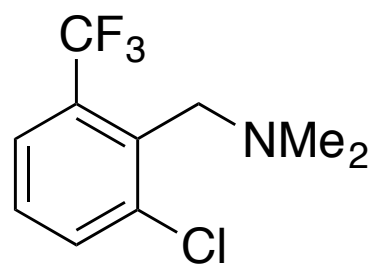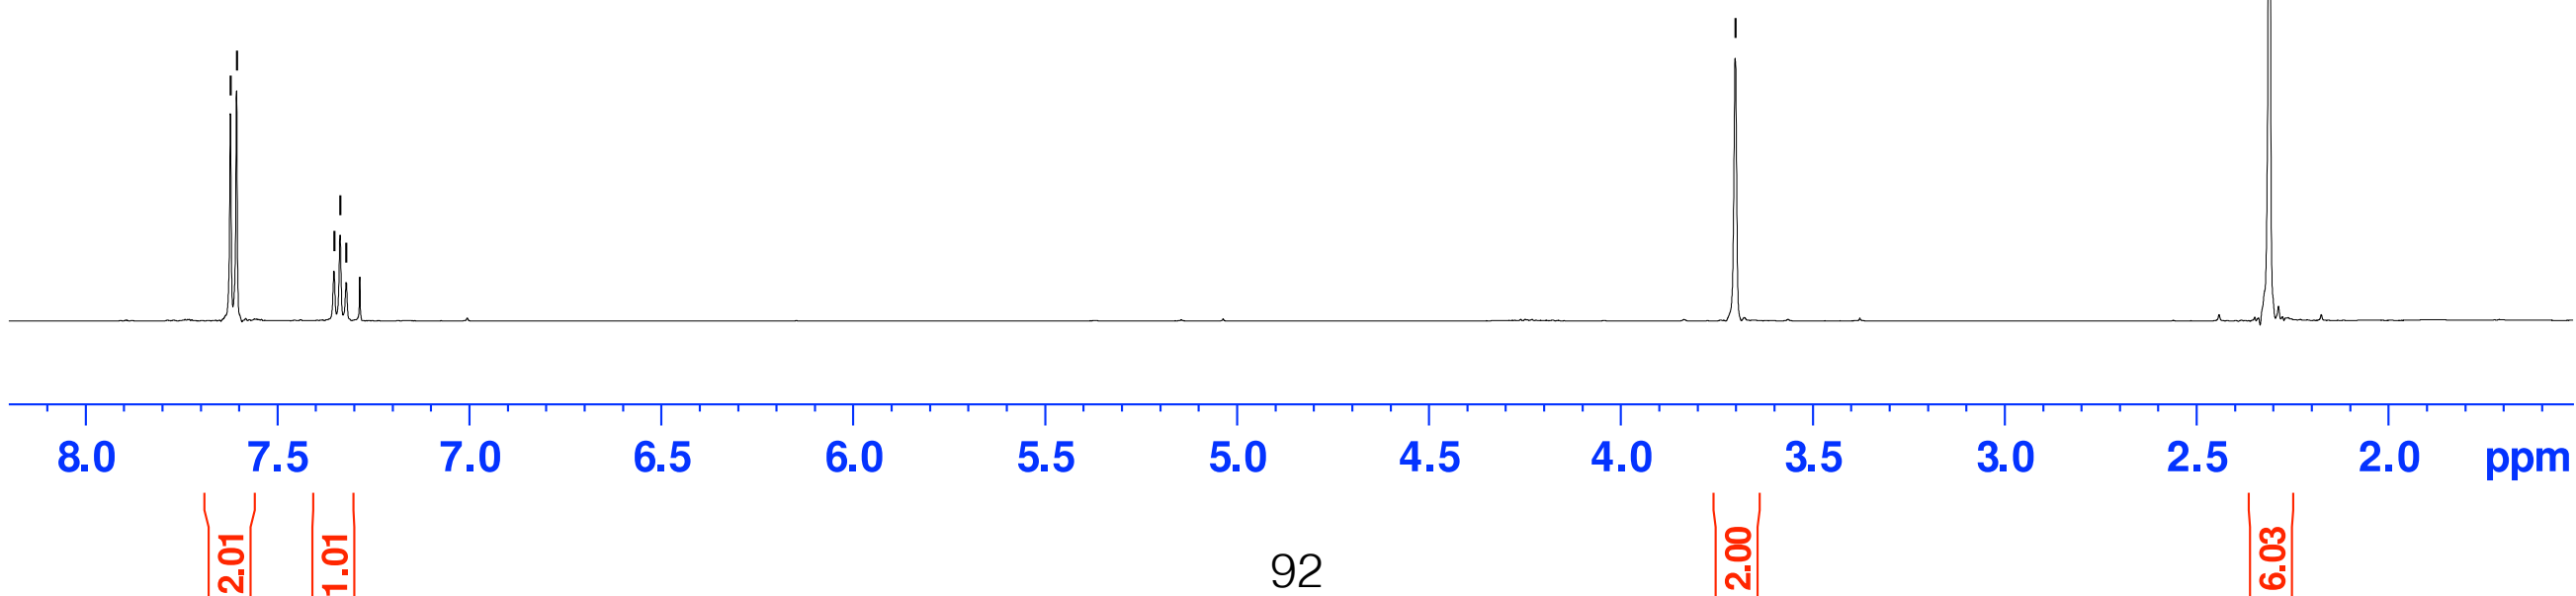



<sup>19</sup>F NMR  
5b

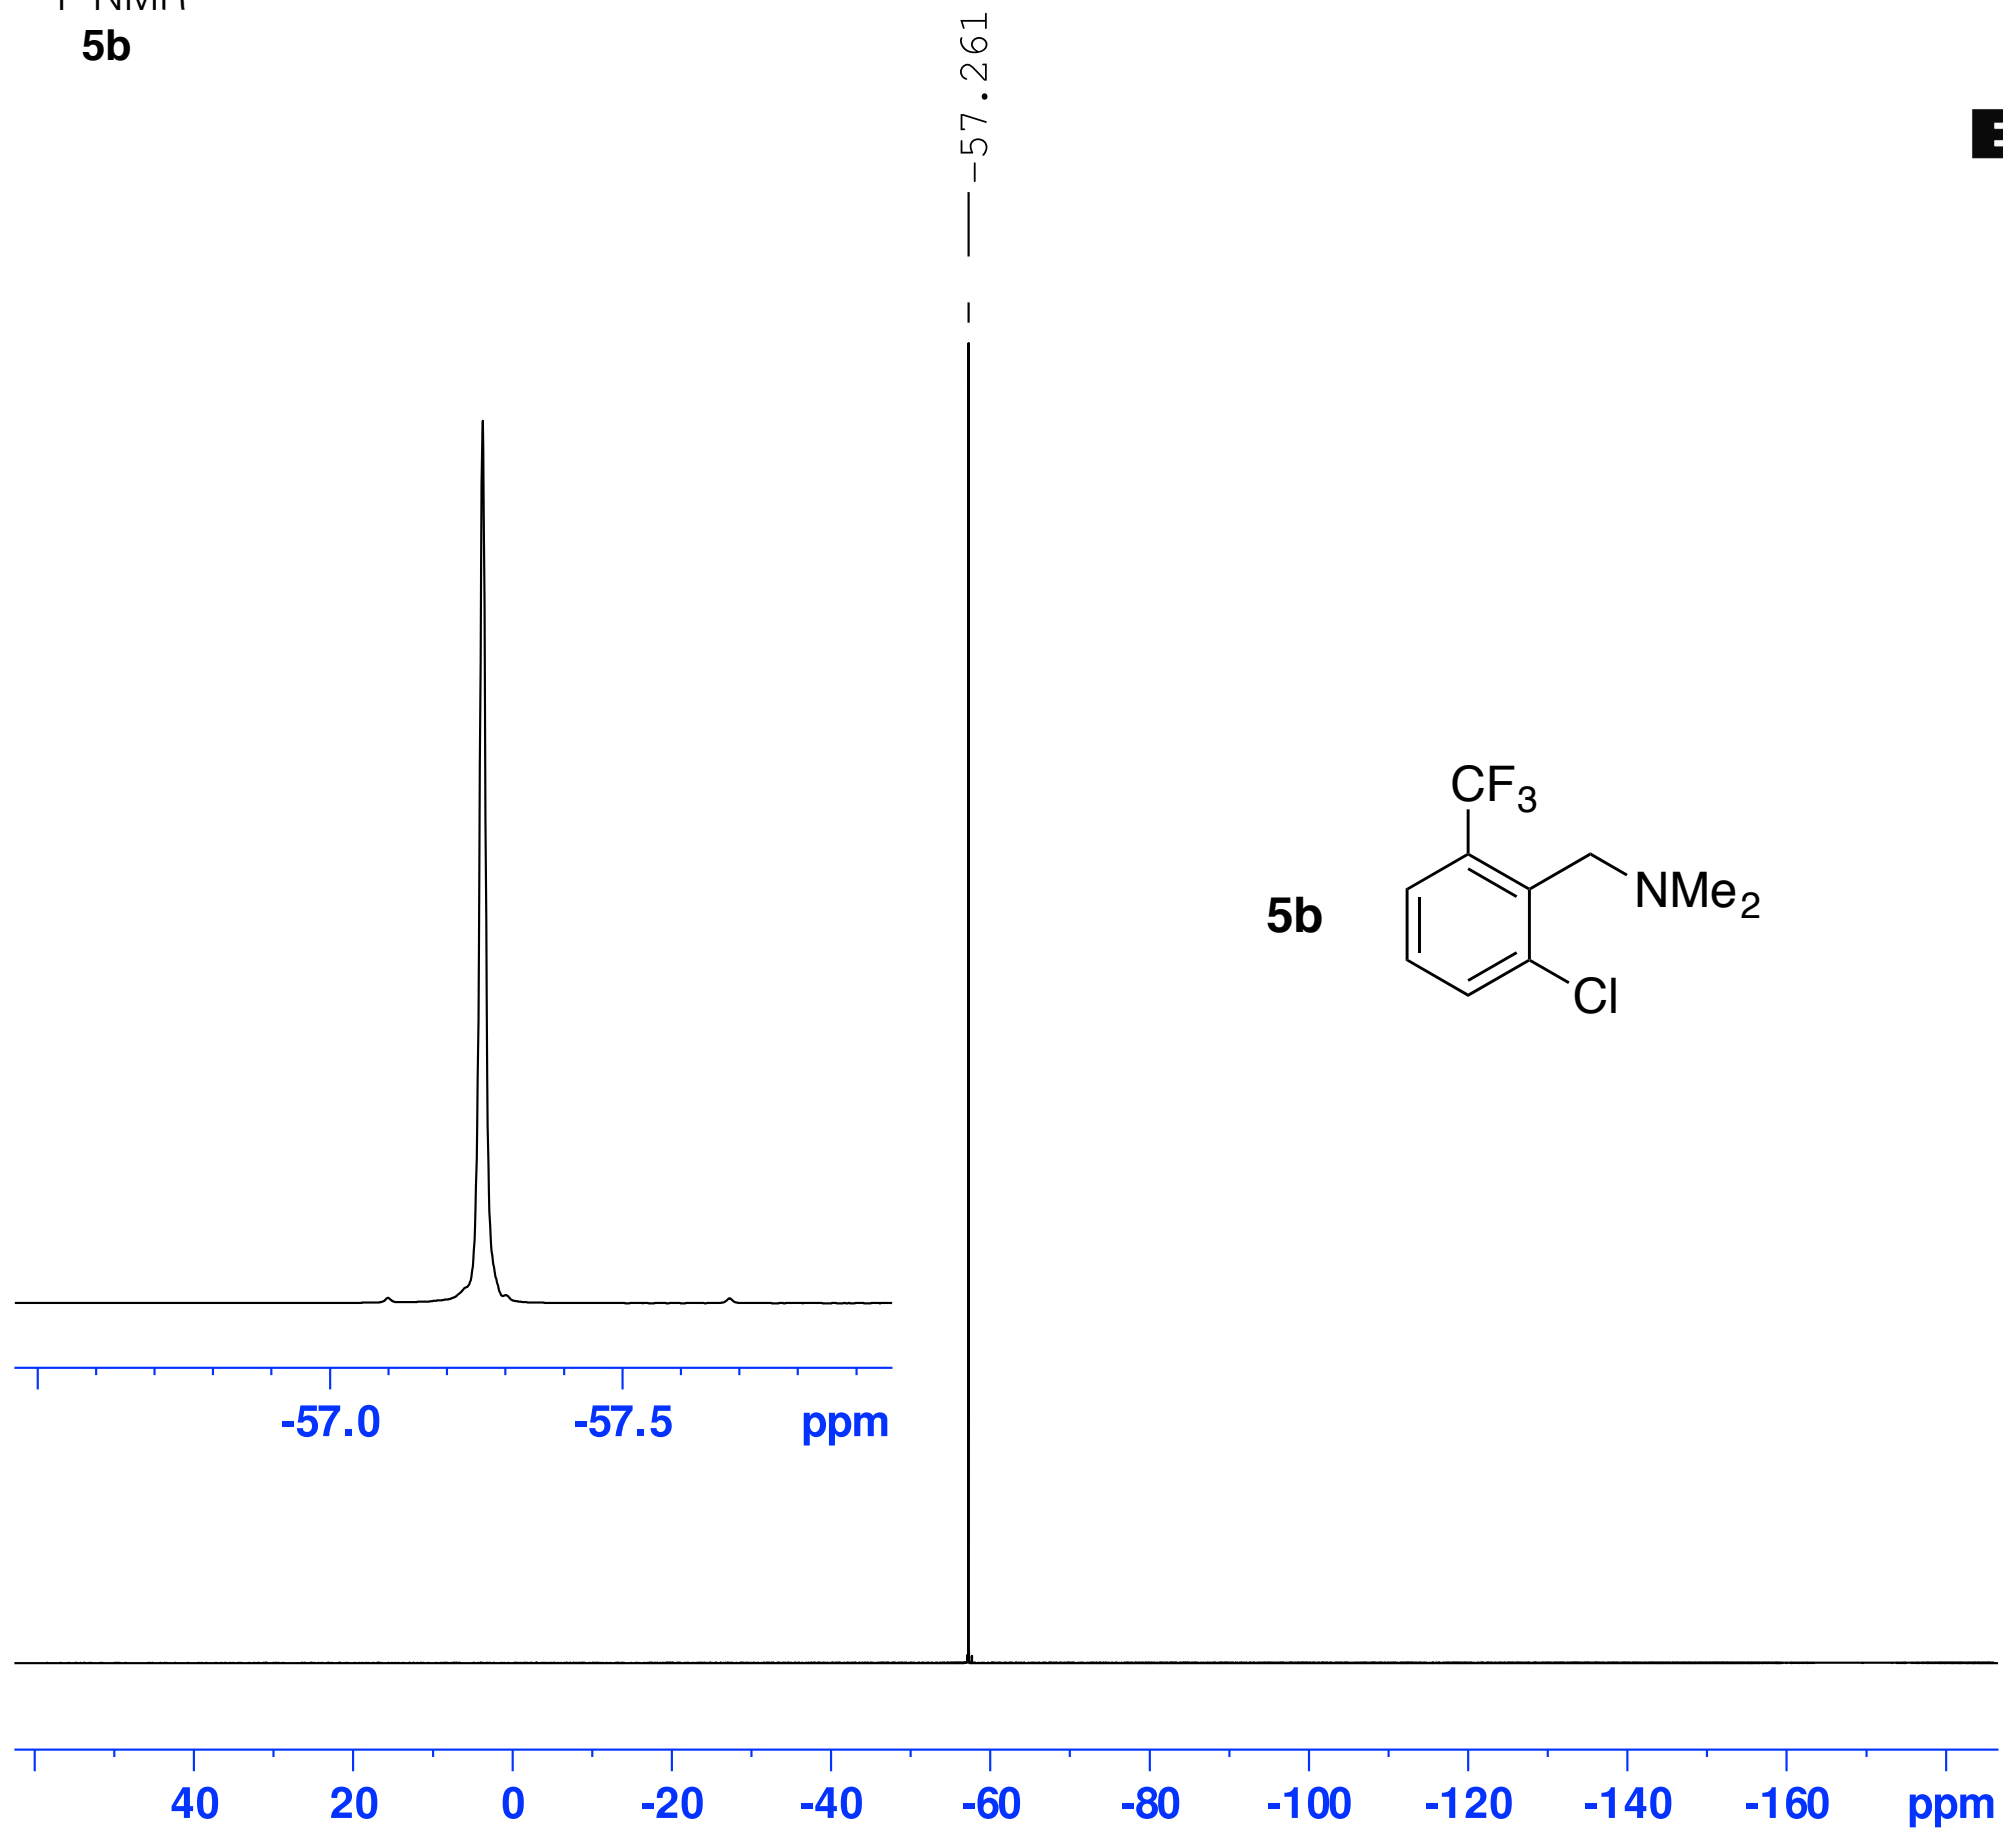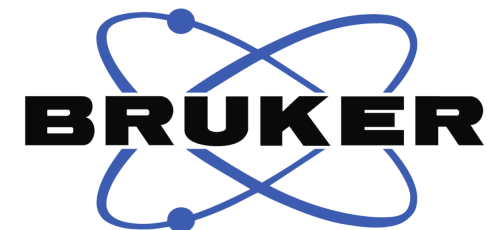

Current Data Parameters  
NAME JJG07178  
EXPNO 2  
PROCNO 1

F2 - Acquisition Parameter  
Date\_ 20160830  
Time 9.38  
INSTRUM spect  
PROBHD 5 mm PABBO BB/  
PULPROG zgflqn  
TD 524288  
SOLVENT CDCl3  
NS 1  
DS 0  
SWH 117187.500 Hz  
FIDRES 0.223517 Hz  
AQ 2.2369621 sec  
RG 249.19  
DW 4.267 usec  
DE 6.50 usec  
TE 295.8 K  
D1 3.00000000 sec  
TD0 1

==== CHANNEL f1 =====  
SFO1 470.3185714 MHz  
NUC1 19F  
P1 15.00 usec  
PLW1 37.79999924 W

F2 - Processing parameters  
SI 262144  
SF 470.3477328 MHz  
WDW EM  
SSB 0  
LB 2.00 Hz  
GB 0  
PC 1.00

138.1630  
136.0418  
133.6781  
131.5976  
131.3595  
128.1929  
124.8599  
124.8118  
124.7697  
124.7154  
122.7271

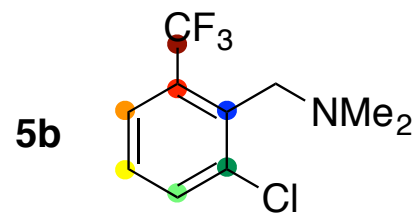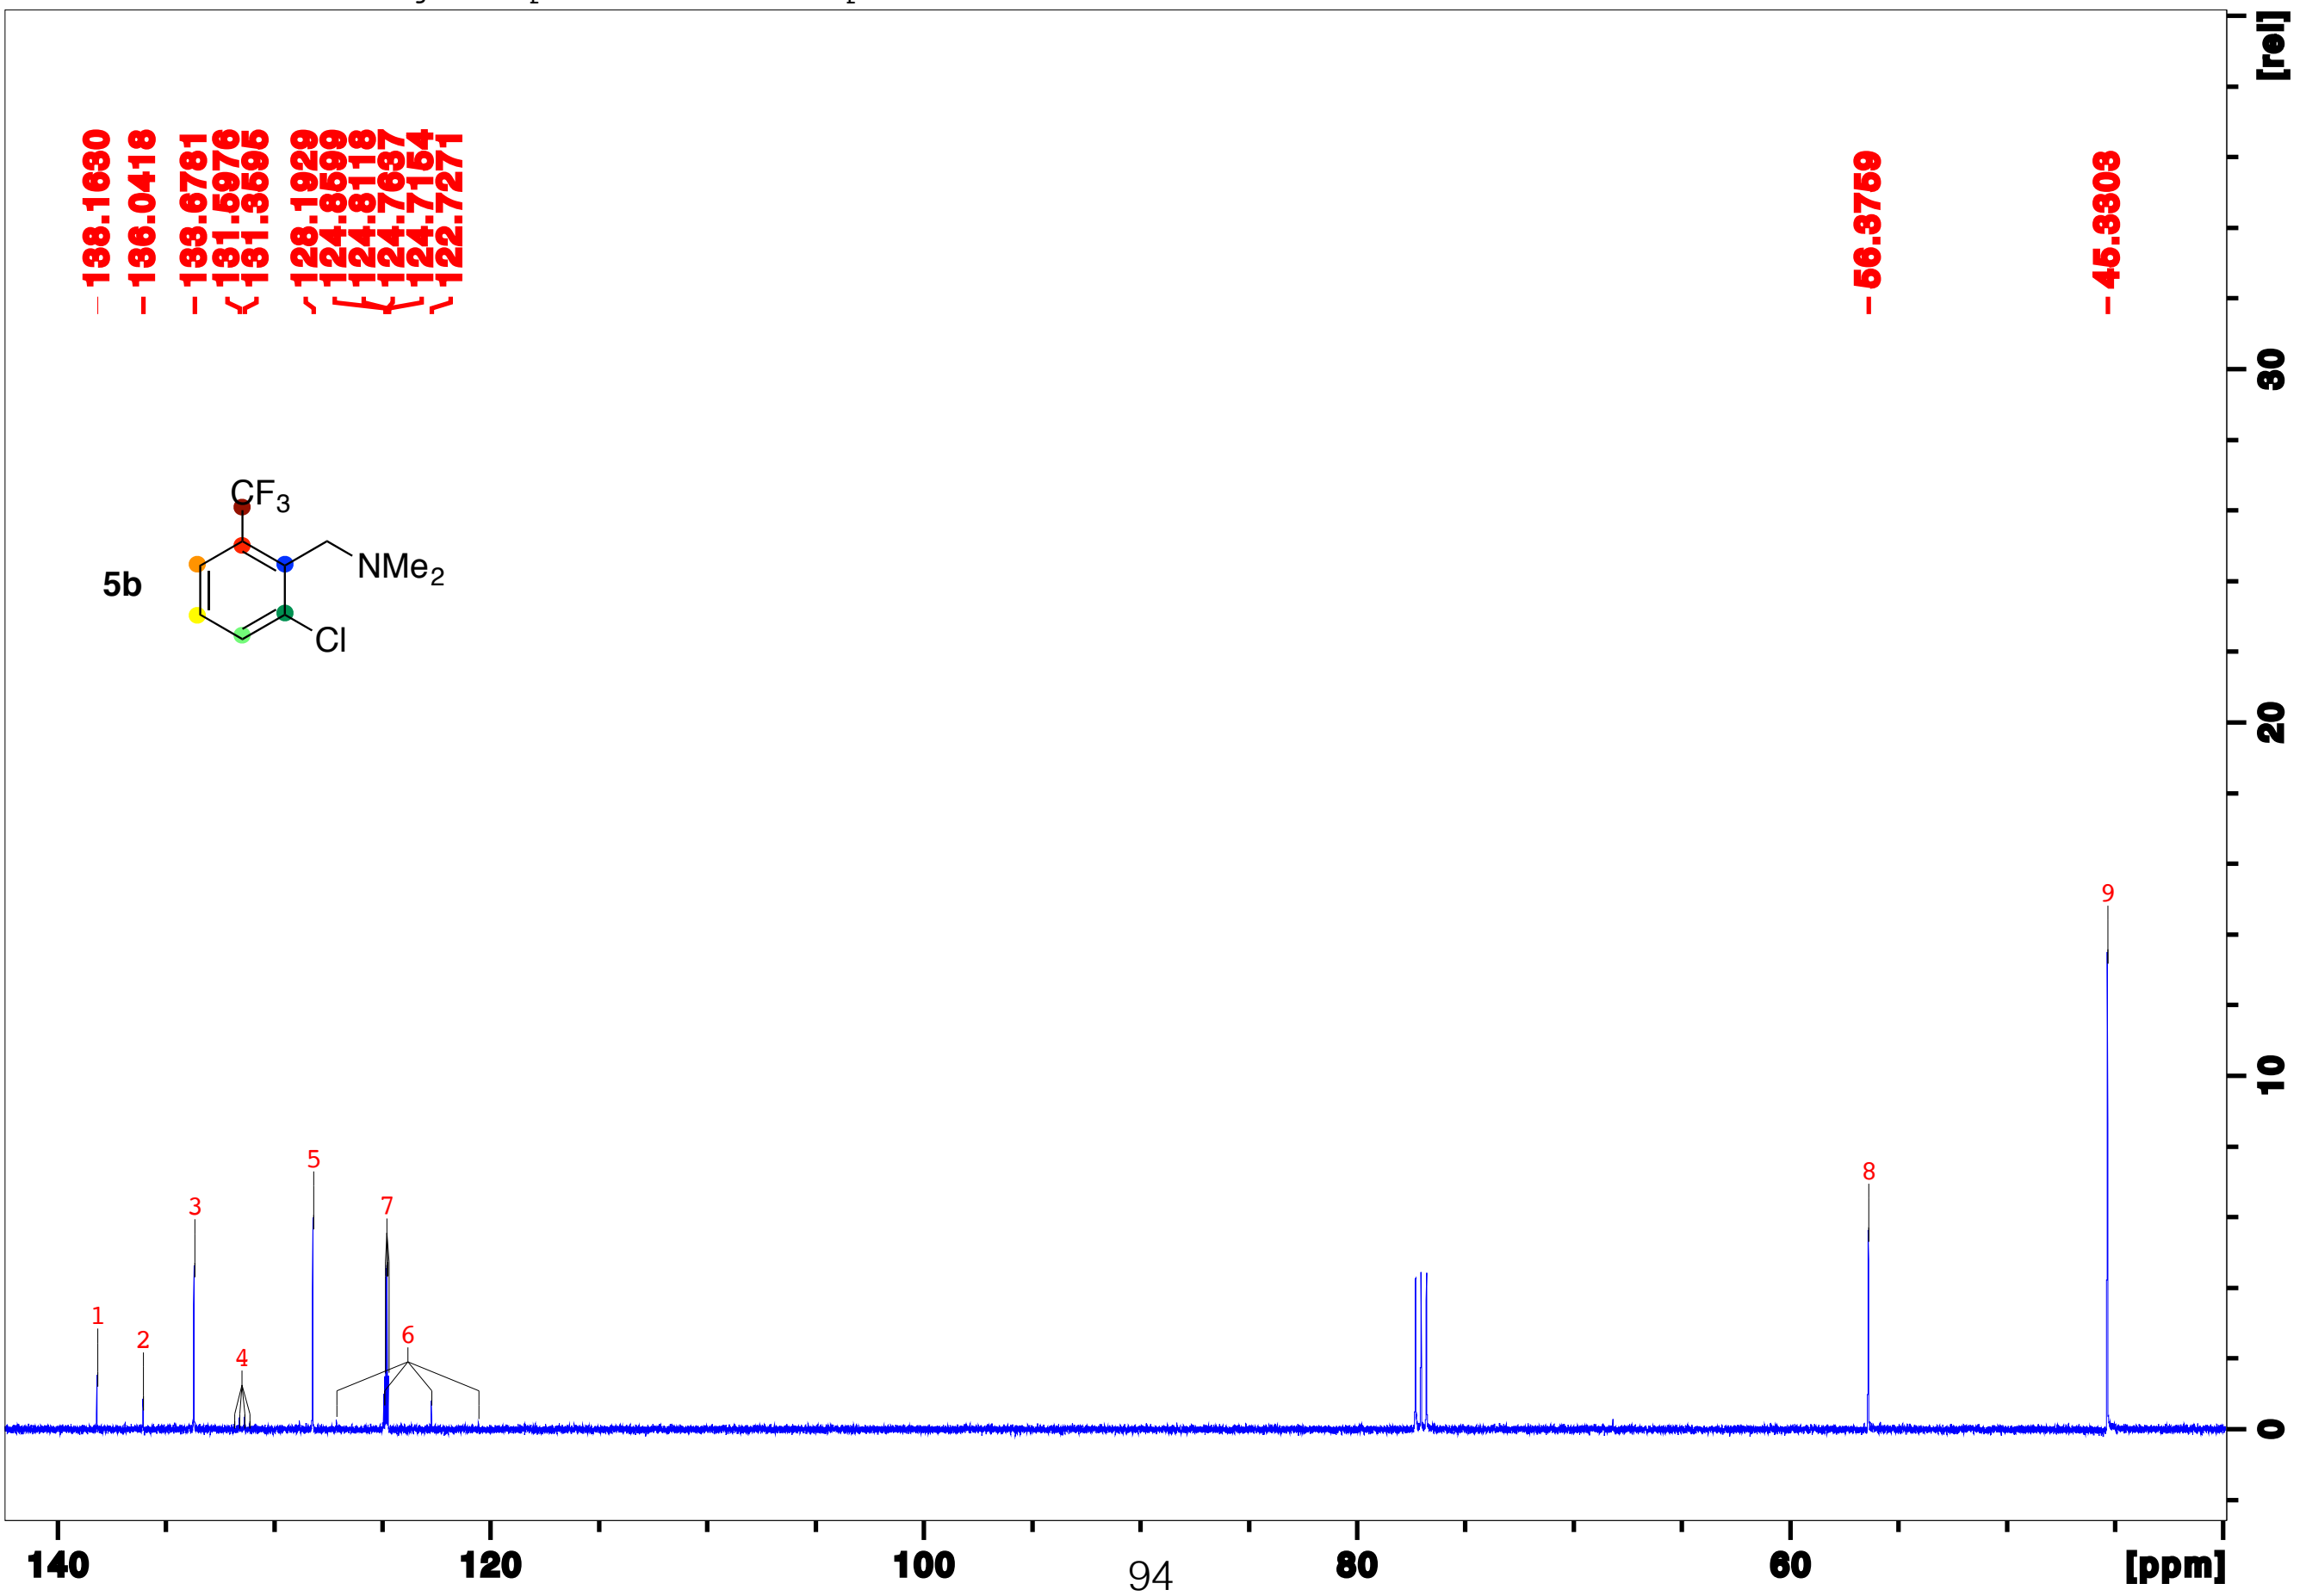

140 120 100 94 80 60 [ppm]

[rel]

<sup>13</sup>C NMR aromatic  
**5b**

JJG07178 4 1 "/Users/joe/Dropbox/Grad/NMR Backups"

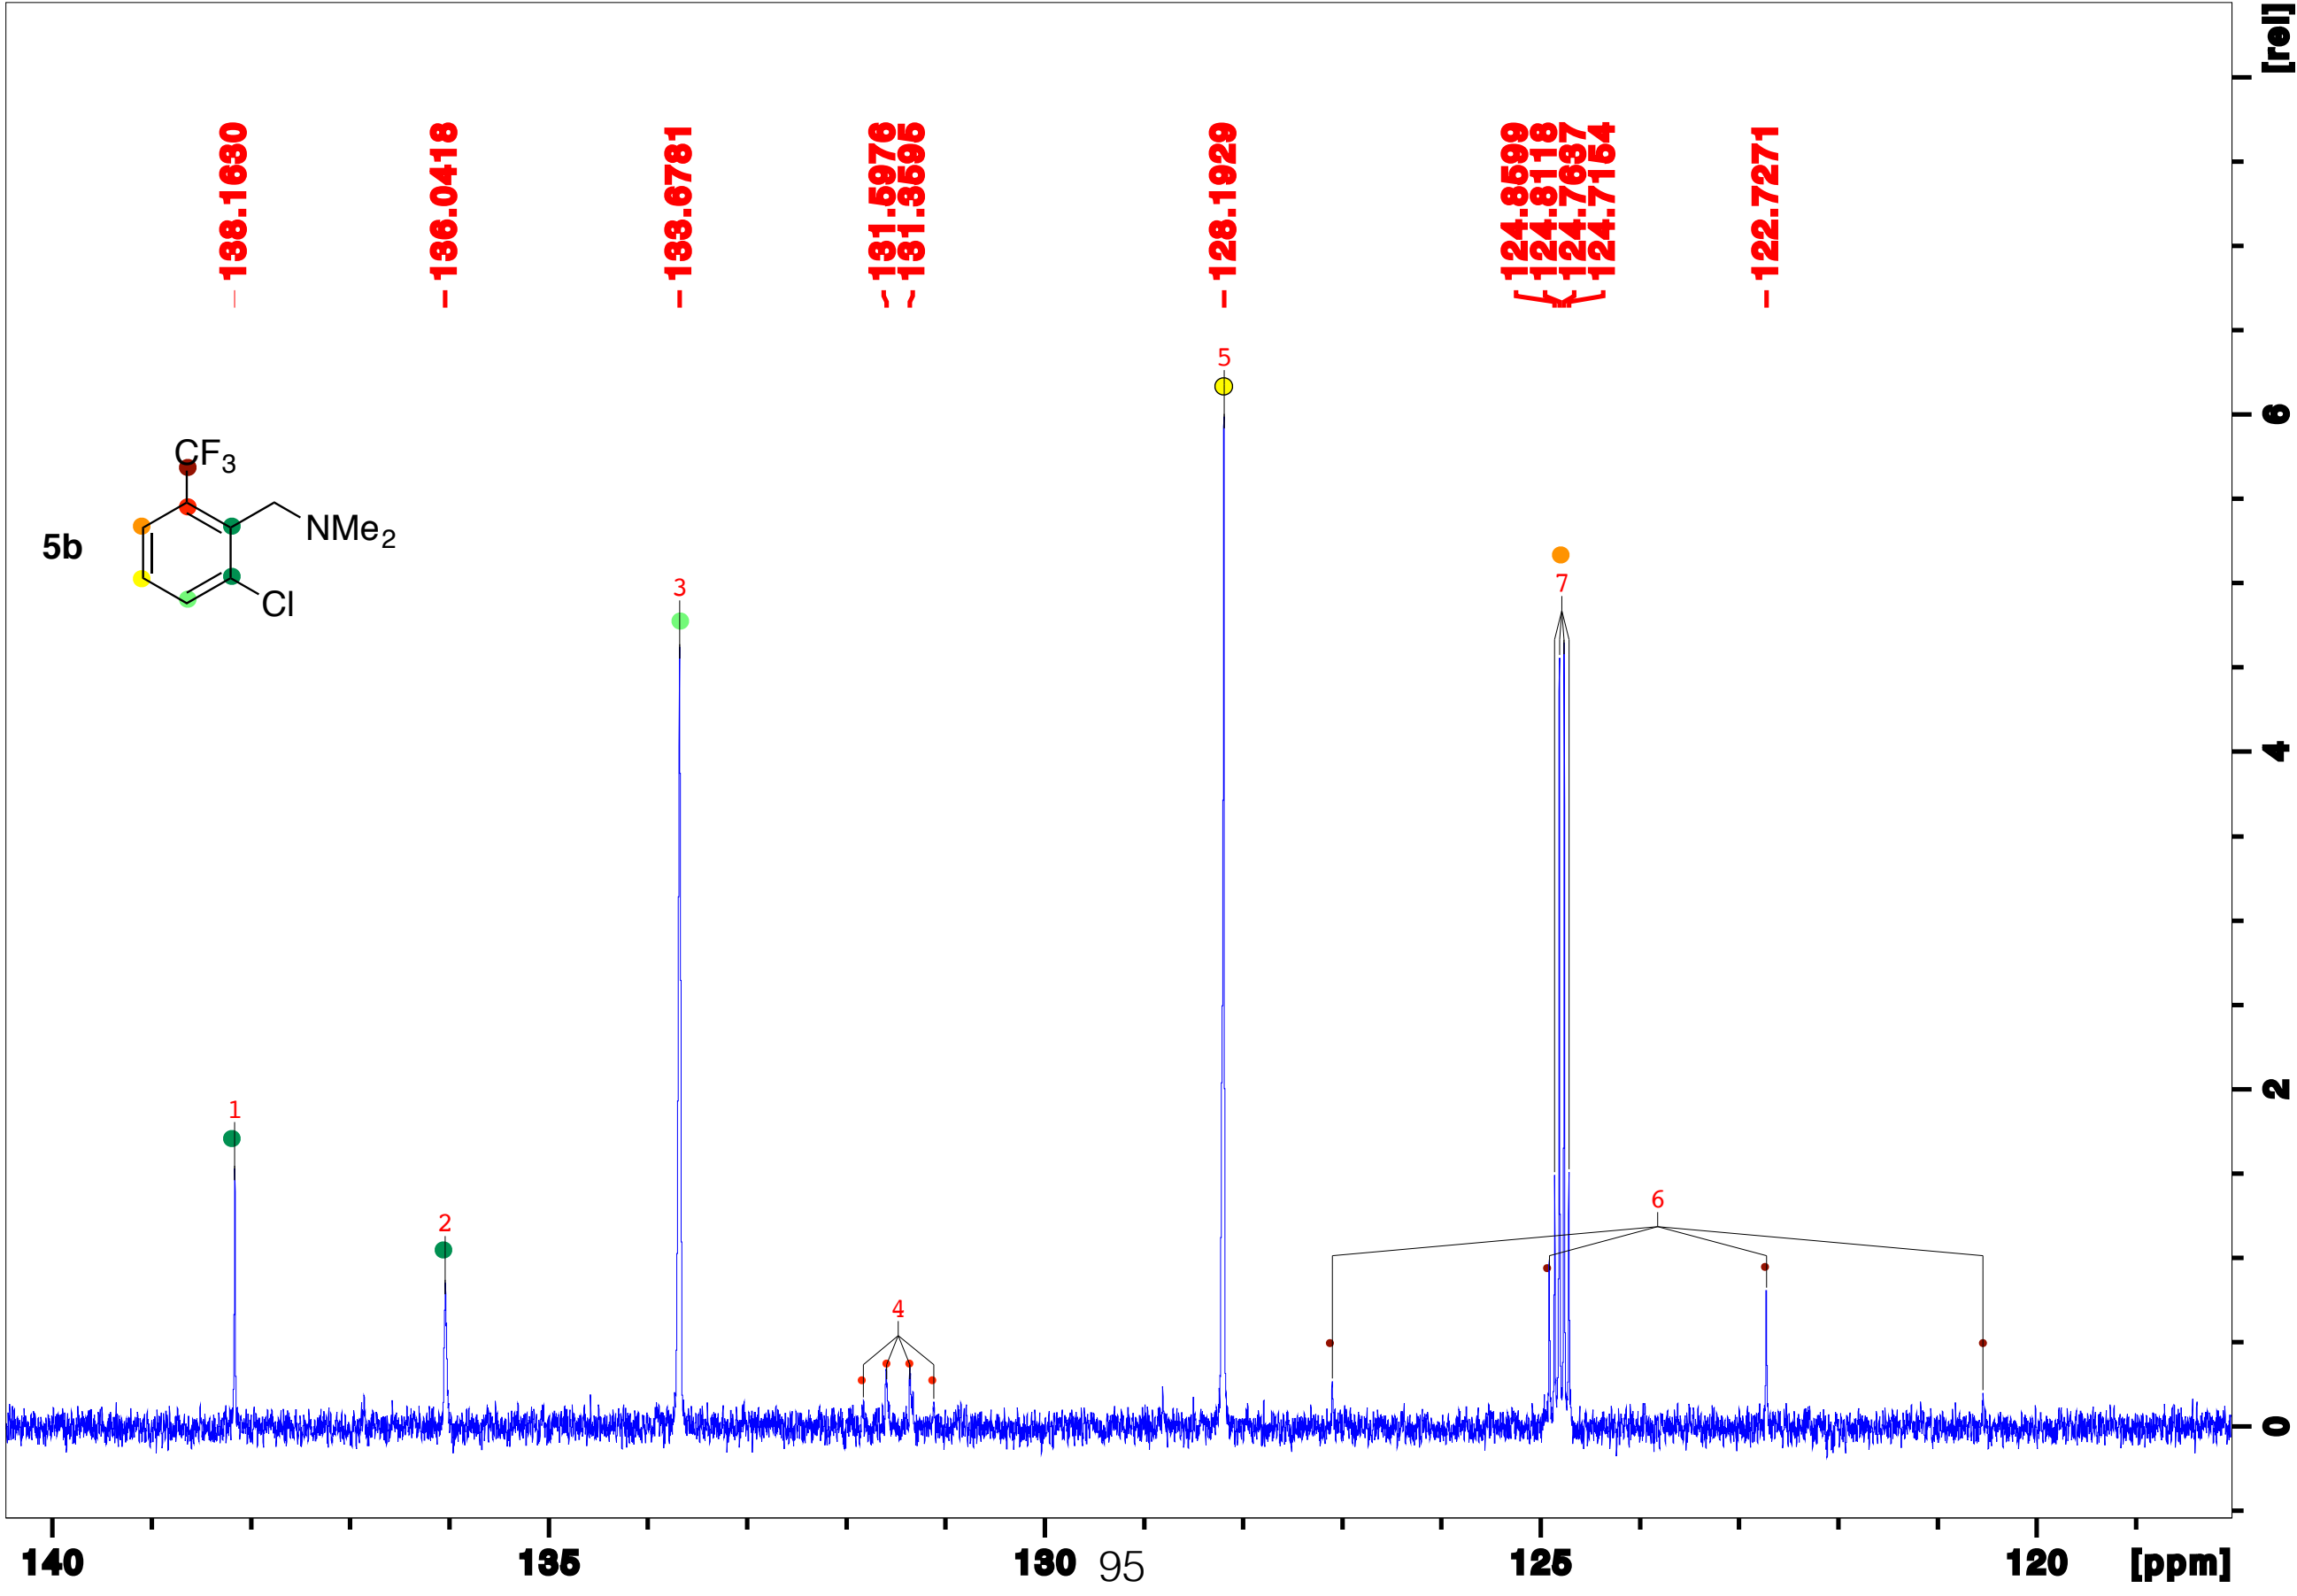

HMQC  
5b

JJG07178 5 1 "/Users/joe/Dropbox/Grad/NMR Backups"

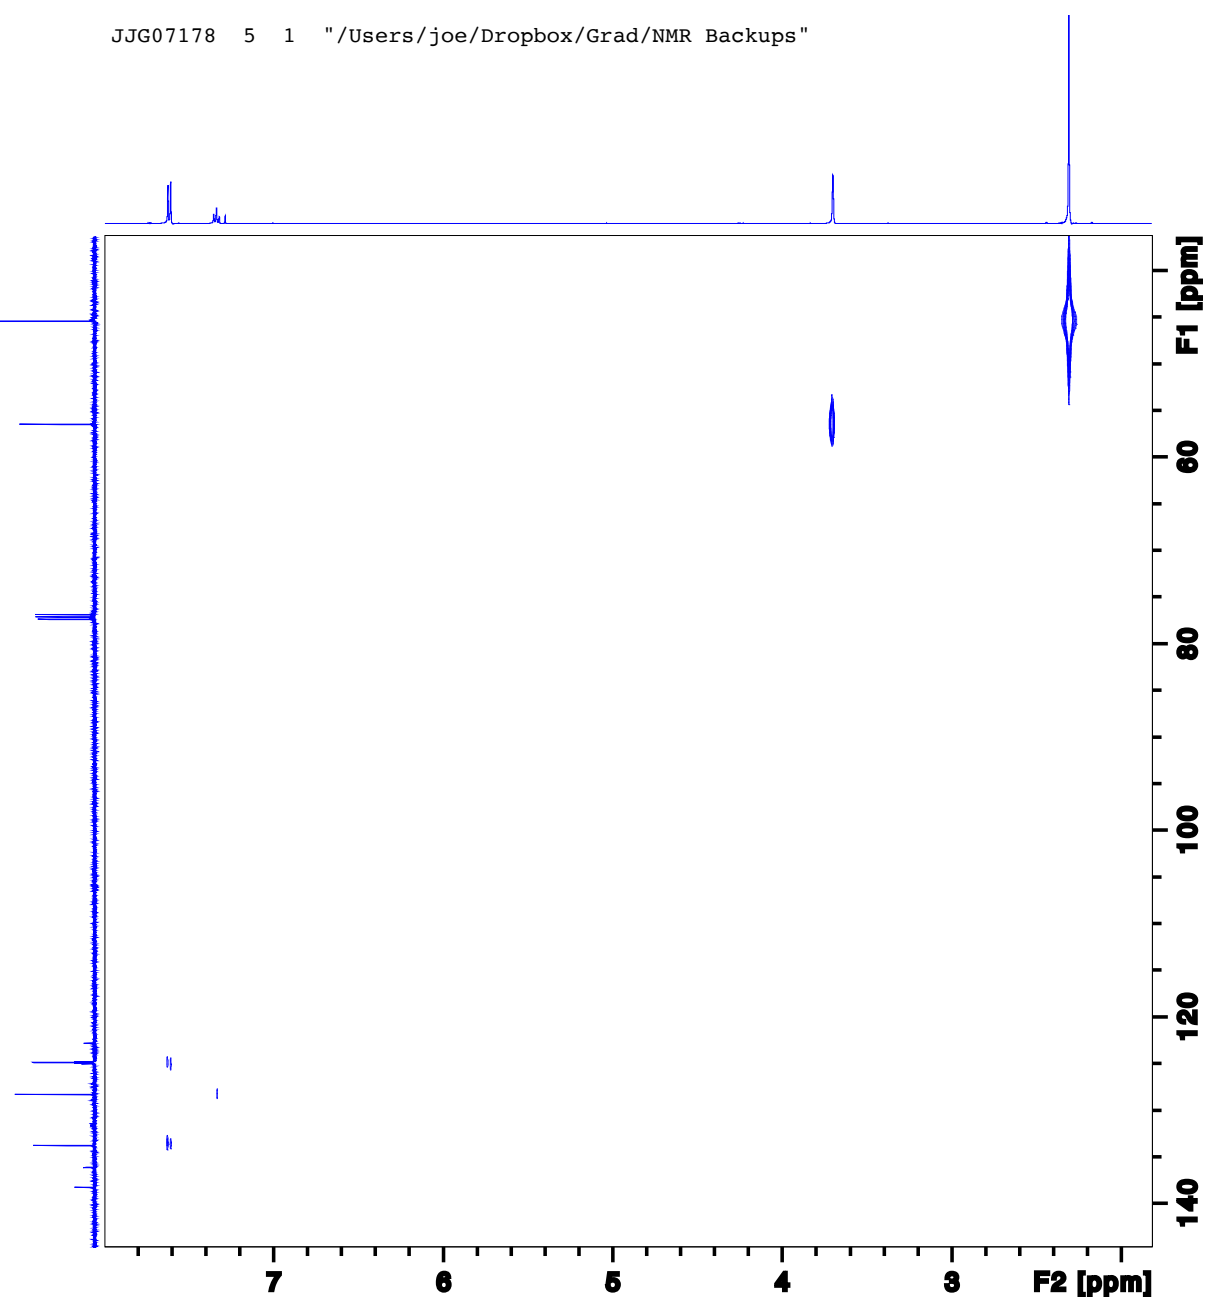

JJG07178 5 1 "/Users/joe/Dropbox/Grad/NMR Backups"

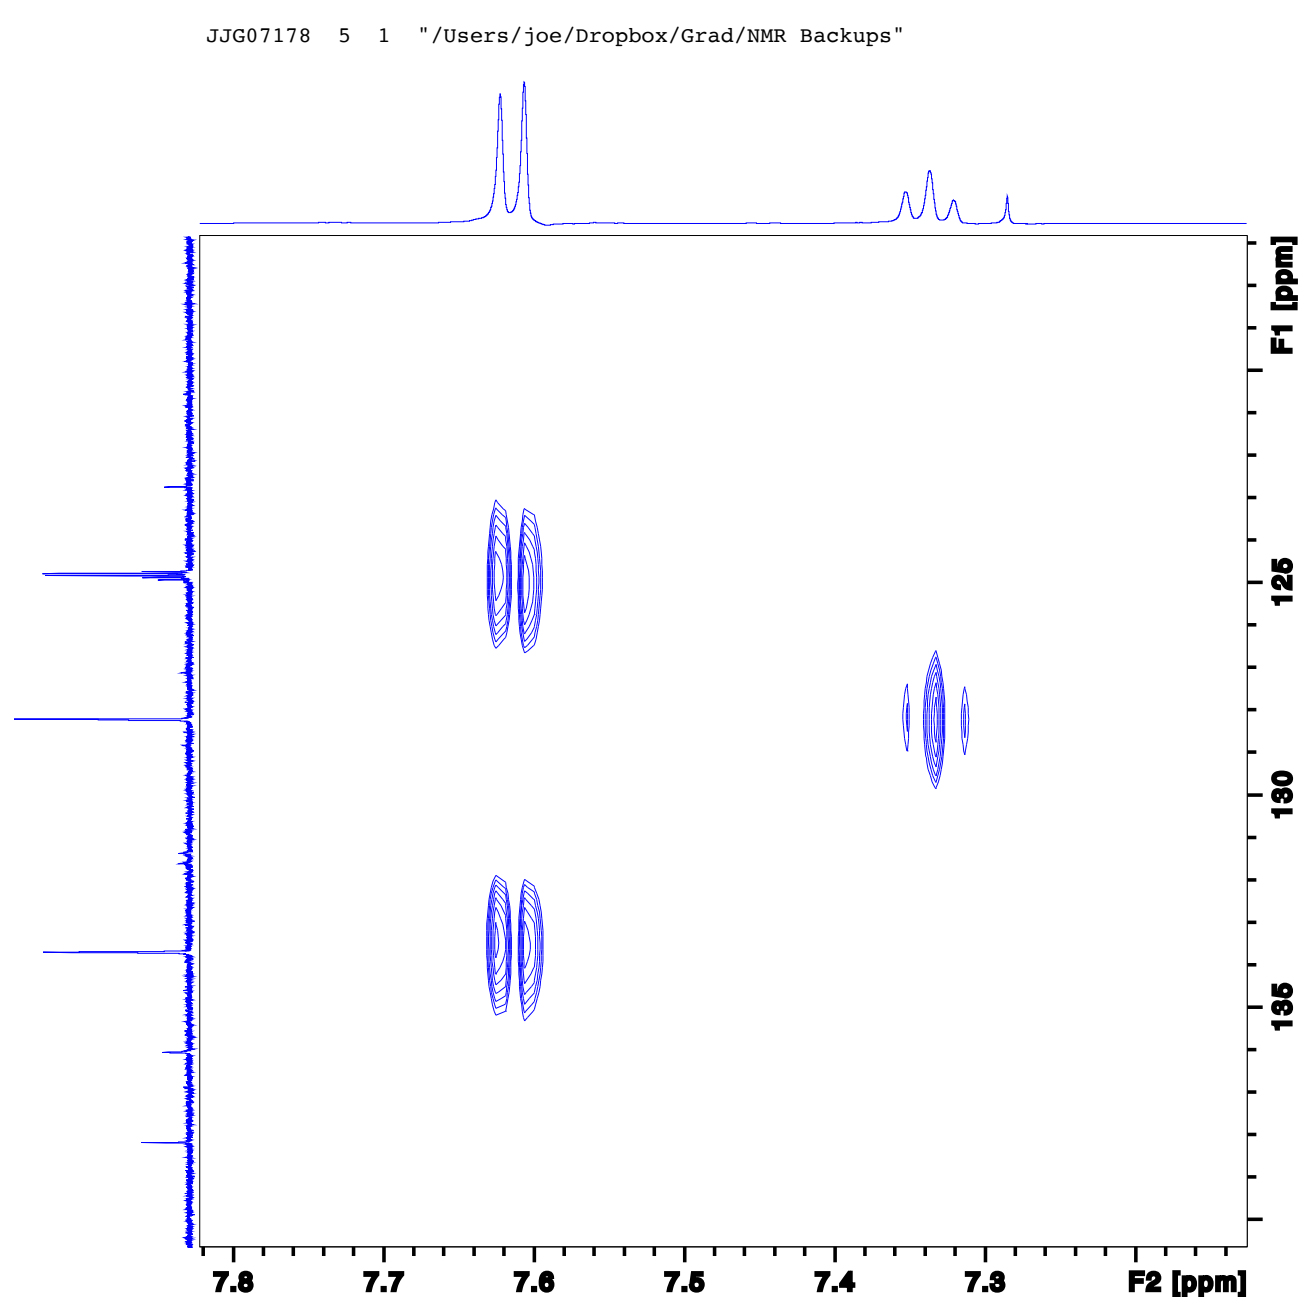

<sup>1</sup>H NMR  
**5c**

7.829  
7.813  
7.667  
7.651  
7.269  
7.254  
7.238

Current Data Parameters  
NAME JYG07179b  
EXPNO 3  
PROCNO 1

3.698

2.307

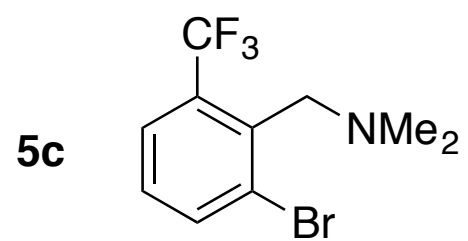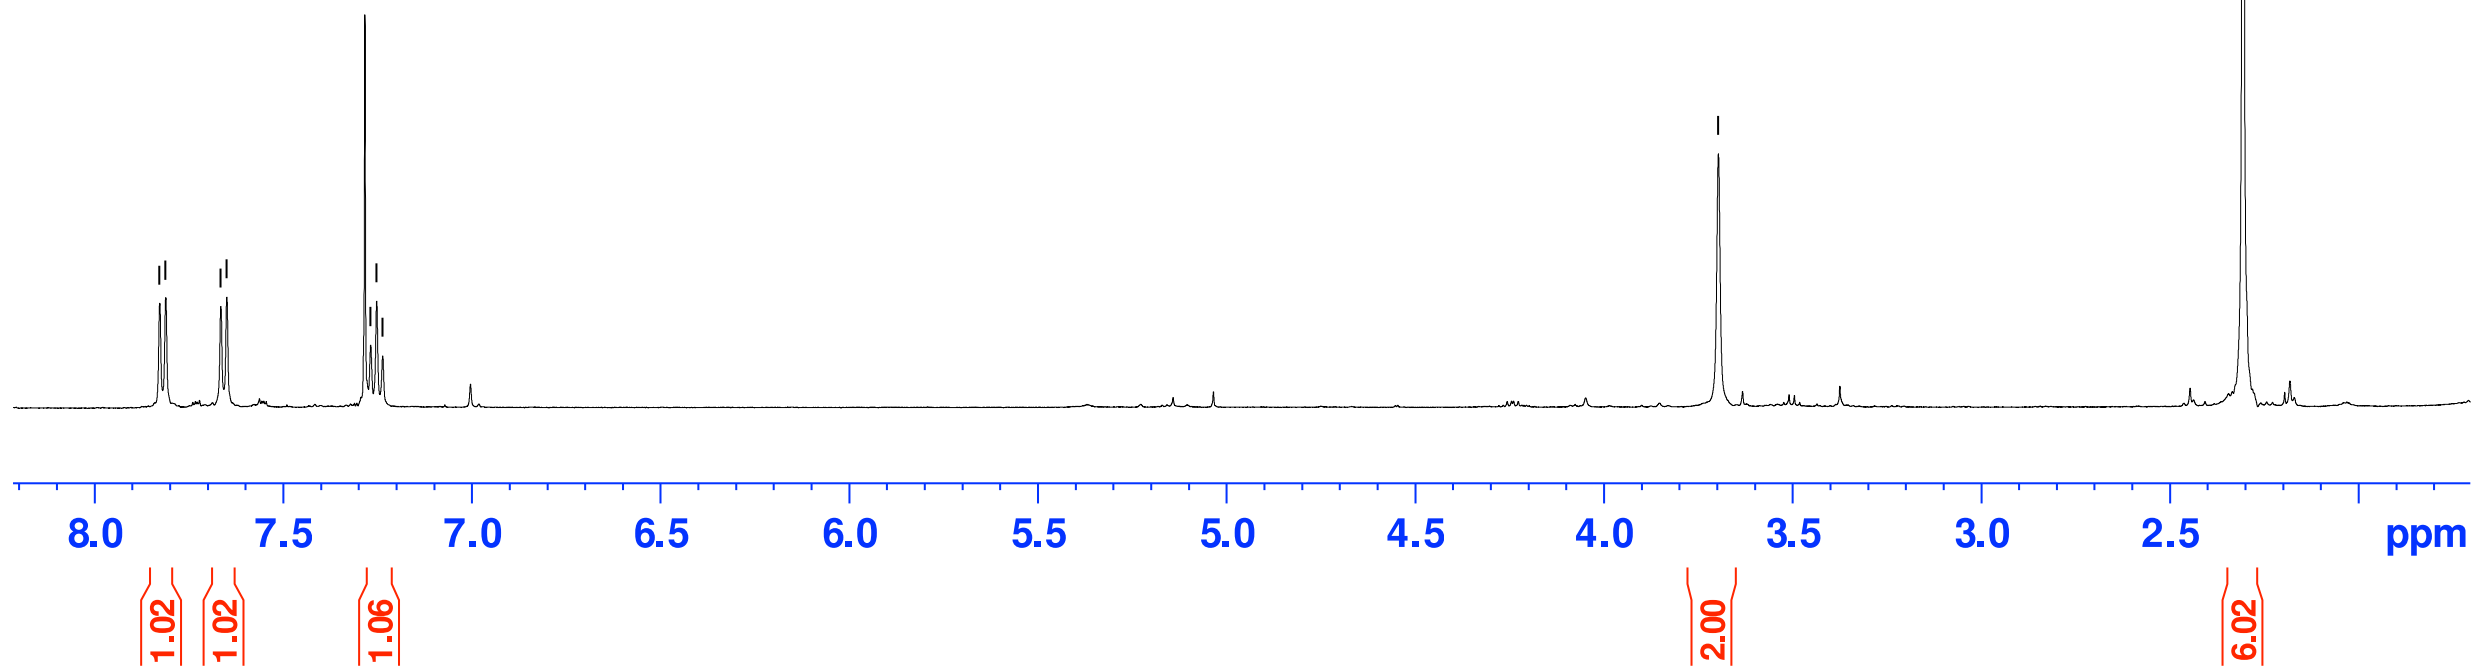

<sup>19</sup>F NMR  
5c

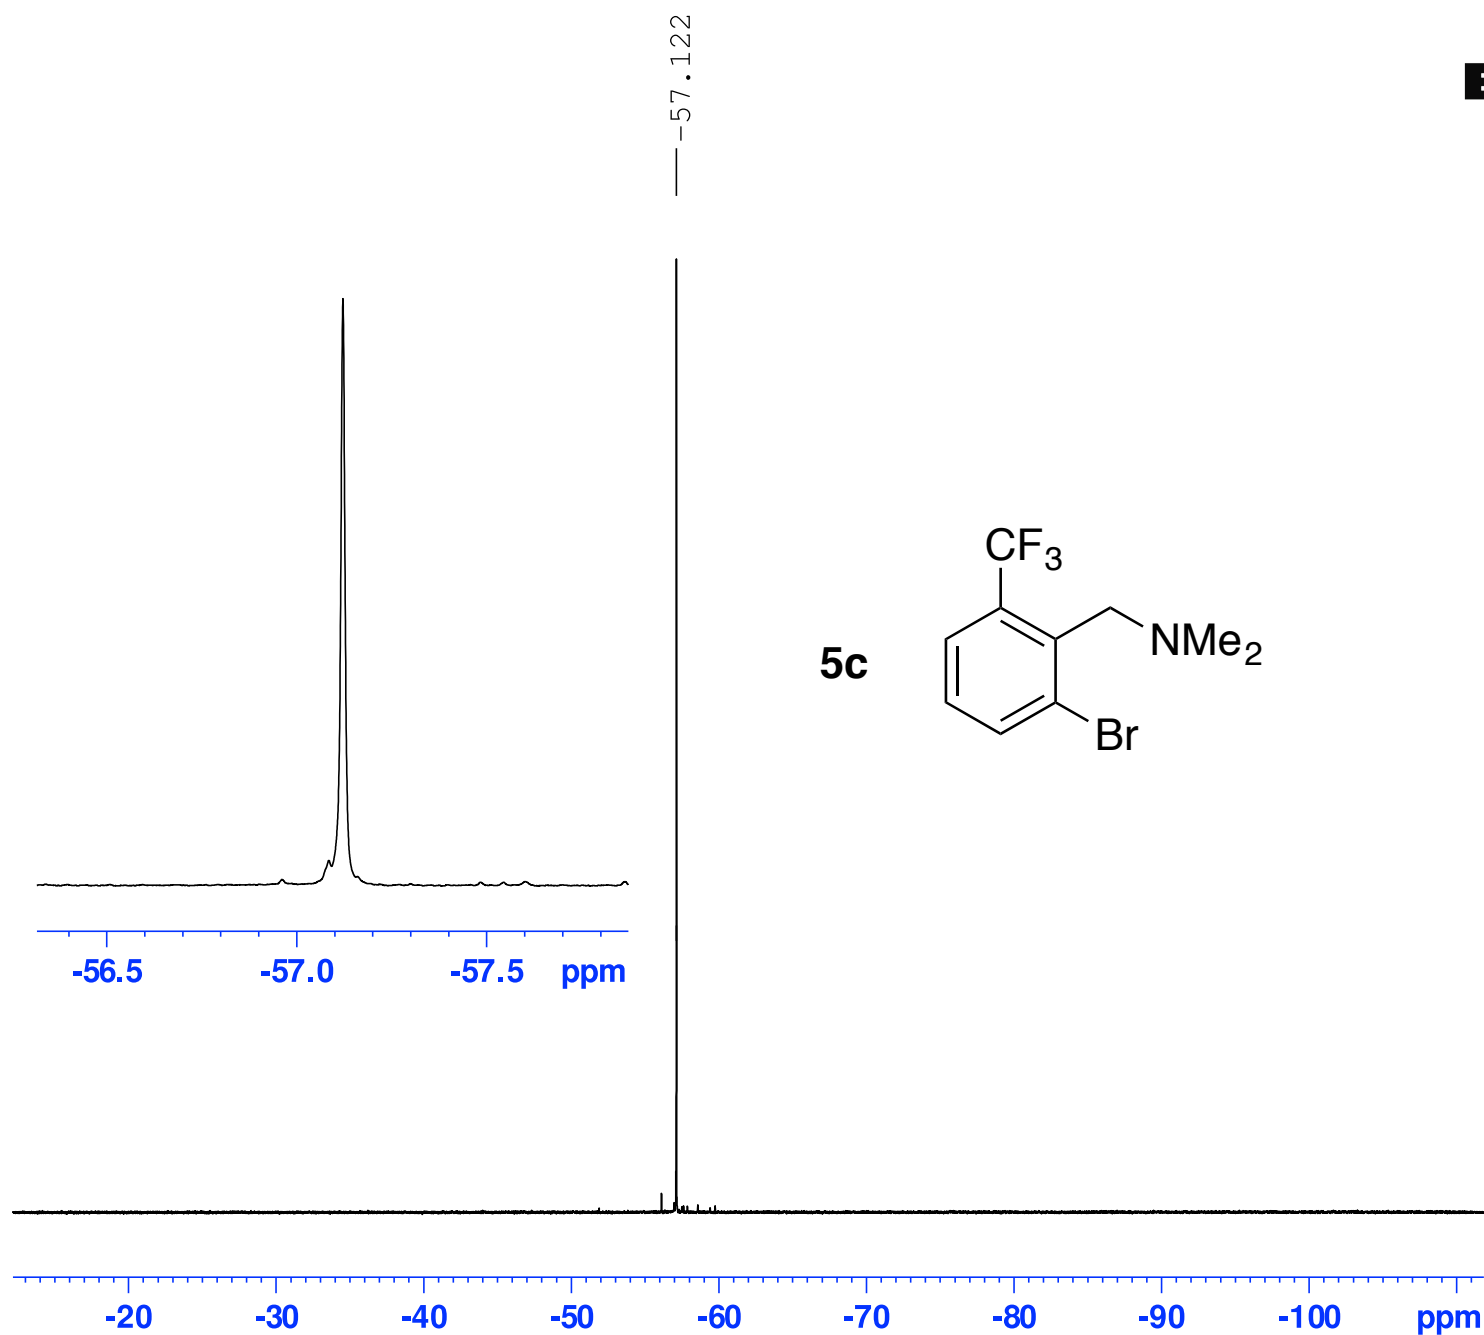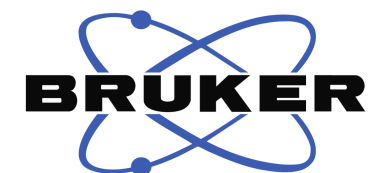

Current Data Parameters  
NAME JYG07179  
EXPNO 4  
PROCNO 1

F2 - Acquisition Parameter  
Date\_ 20160831  
Time 9.55  
INSTRUM spect  
PROBHD 5 mm PABBO BB/  
PULPROG zgflqn  
TD 281244  
SOLVENT CDCl3  
NS 1  
DS 0  
SWH 46875.000 Hz  
FIDRES 0.166670 Hz  
AQ 2.9999361 sec  
RG 695.65  
DW 10.667 usec  
DE 6.50 usec  
TE 295.8 K  
D1 3.00000000 sec  
TD0 1

===== CHANNEL f1 =====  
SF01 470.3185714 MHz  
NUC1 19F  
P1 15.00 usec  
PLW1 37.79999924 W

F2 - Processing parameters  
SI 262144  
SF 470.3477328 MHz  
WDW EM  
SSB 0  
LB 2.00 Hz  
GB 0  
PC 1.00

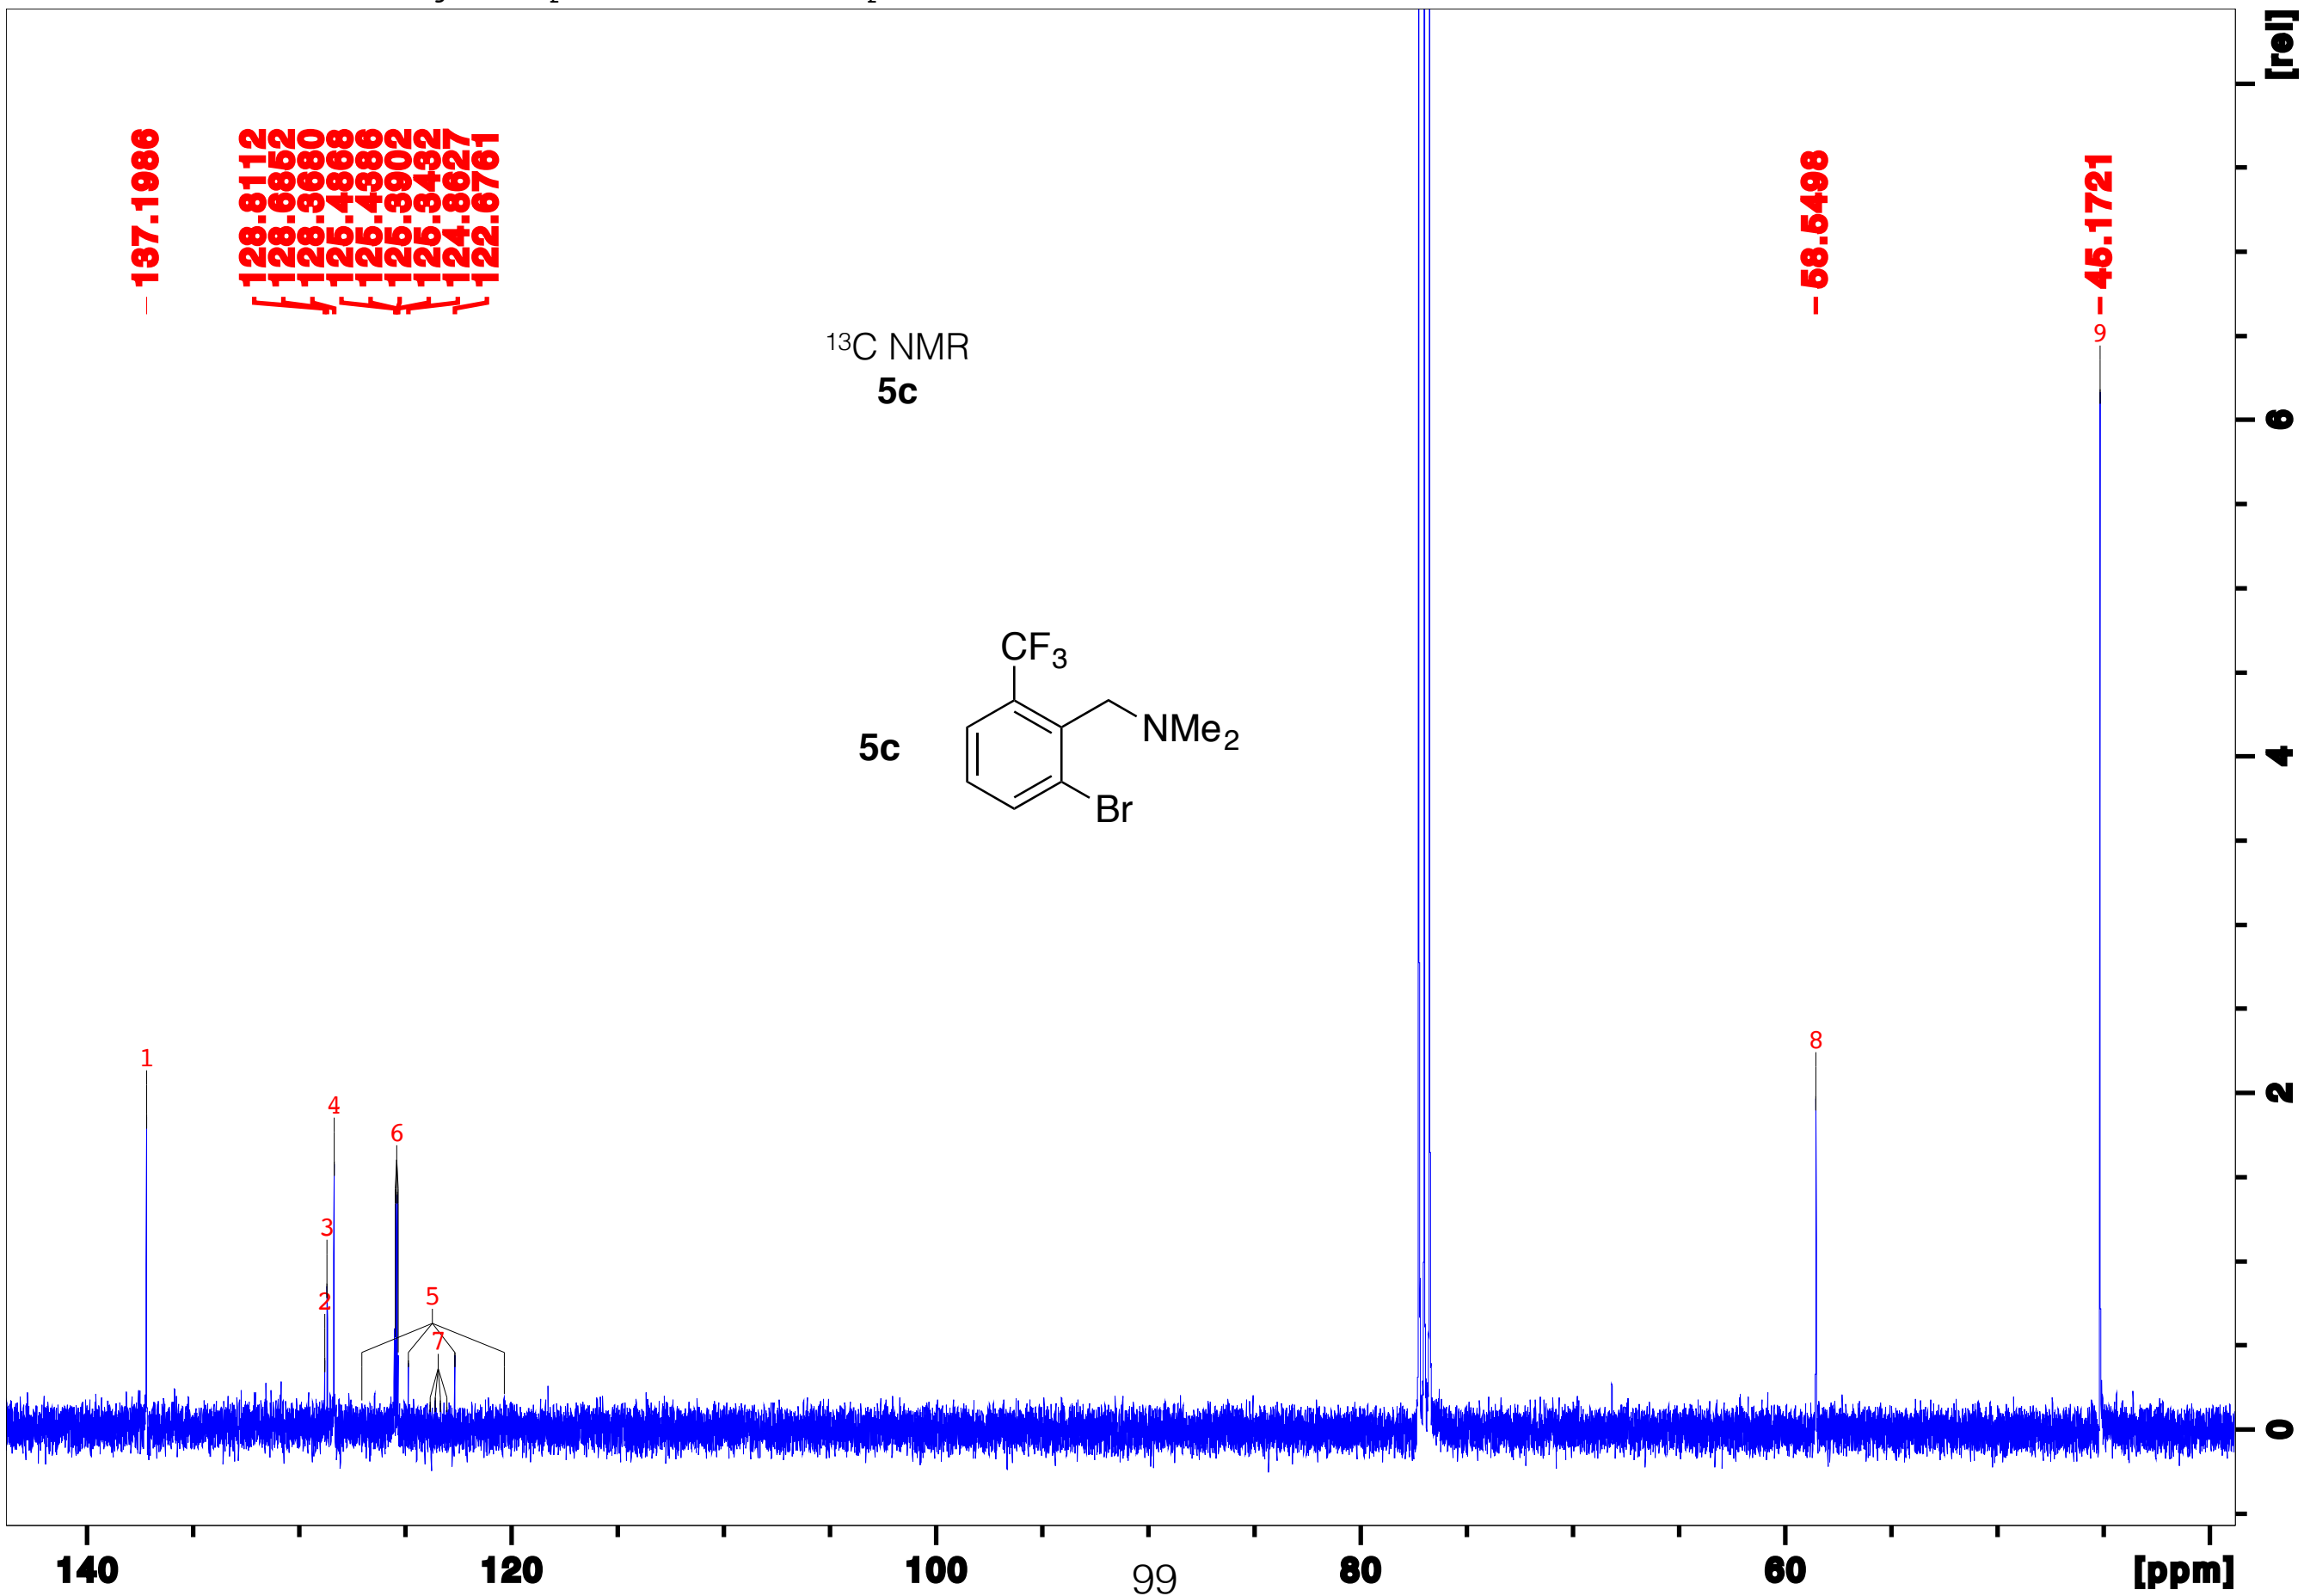

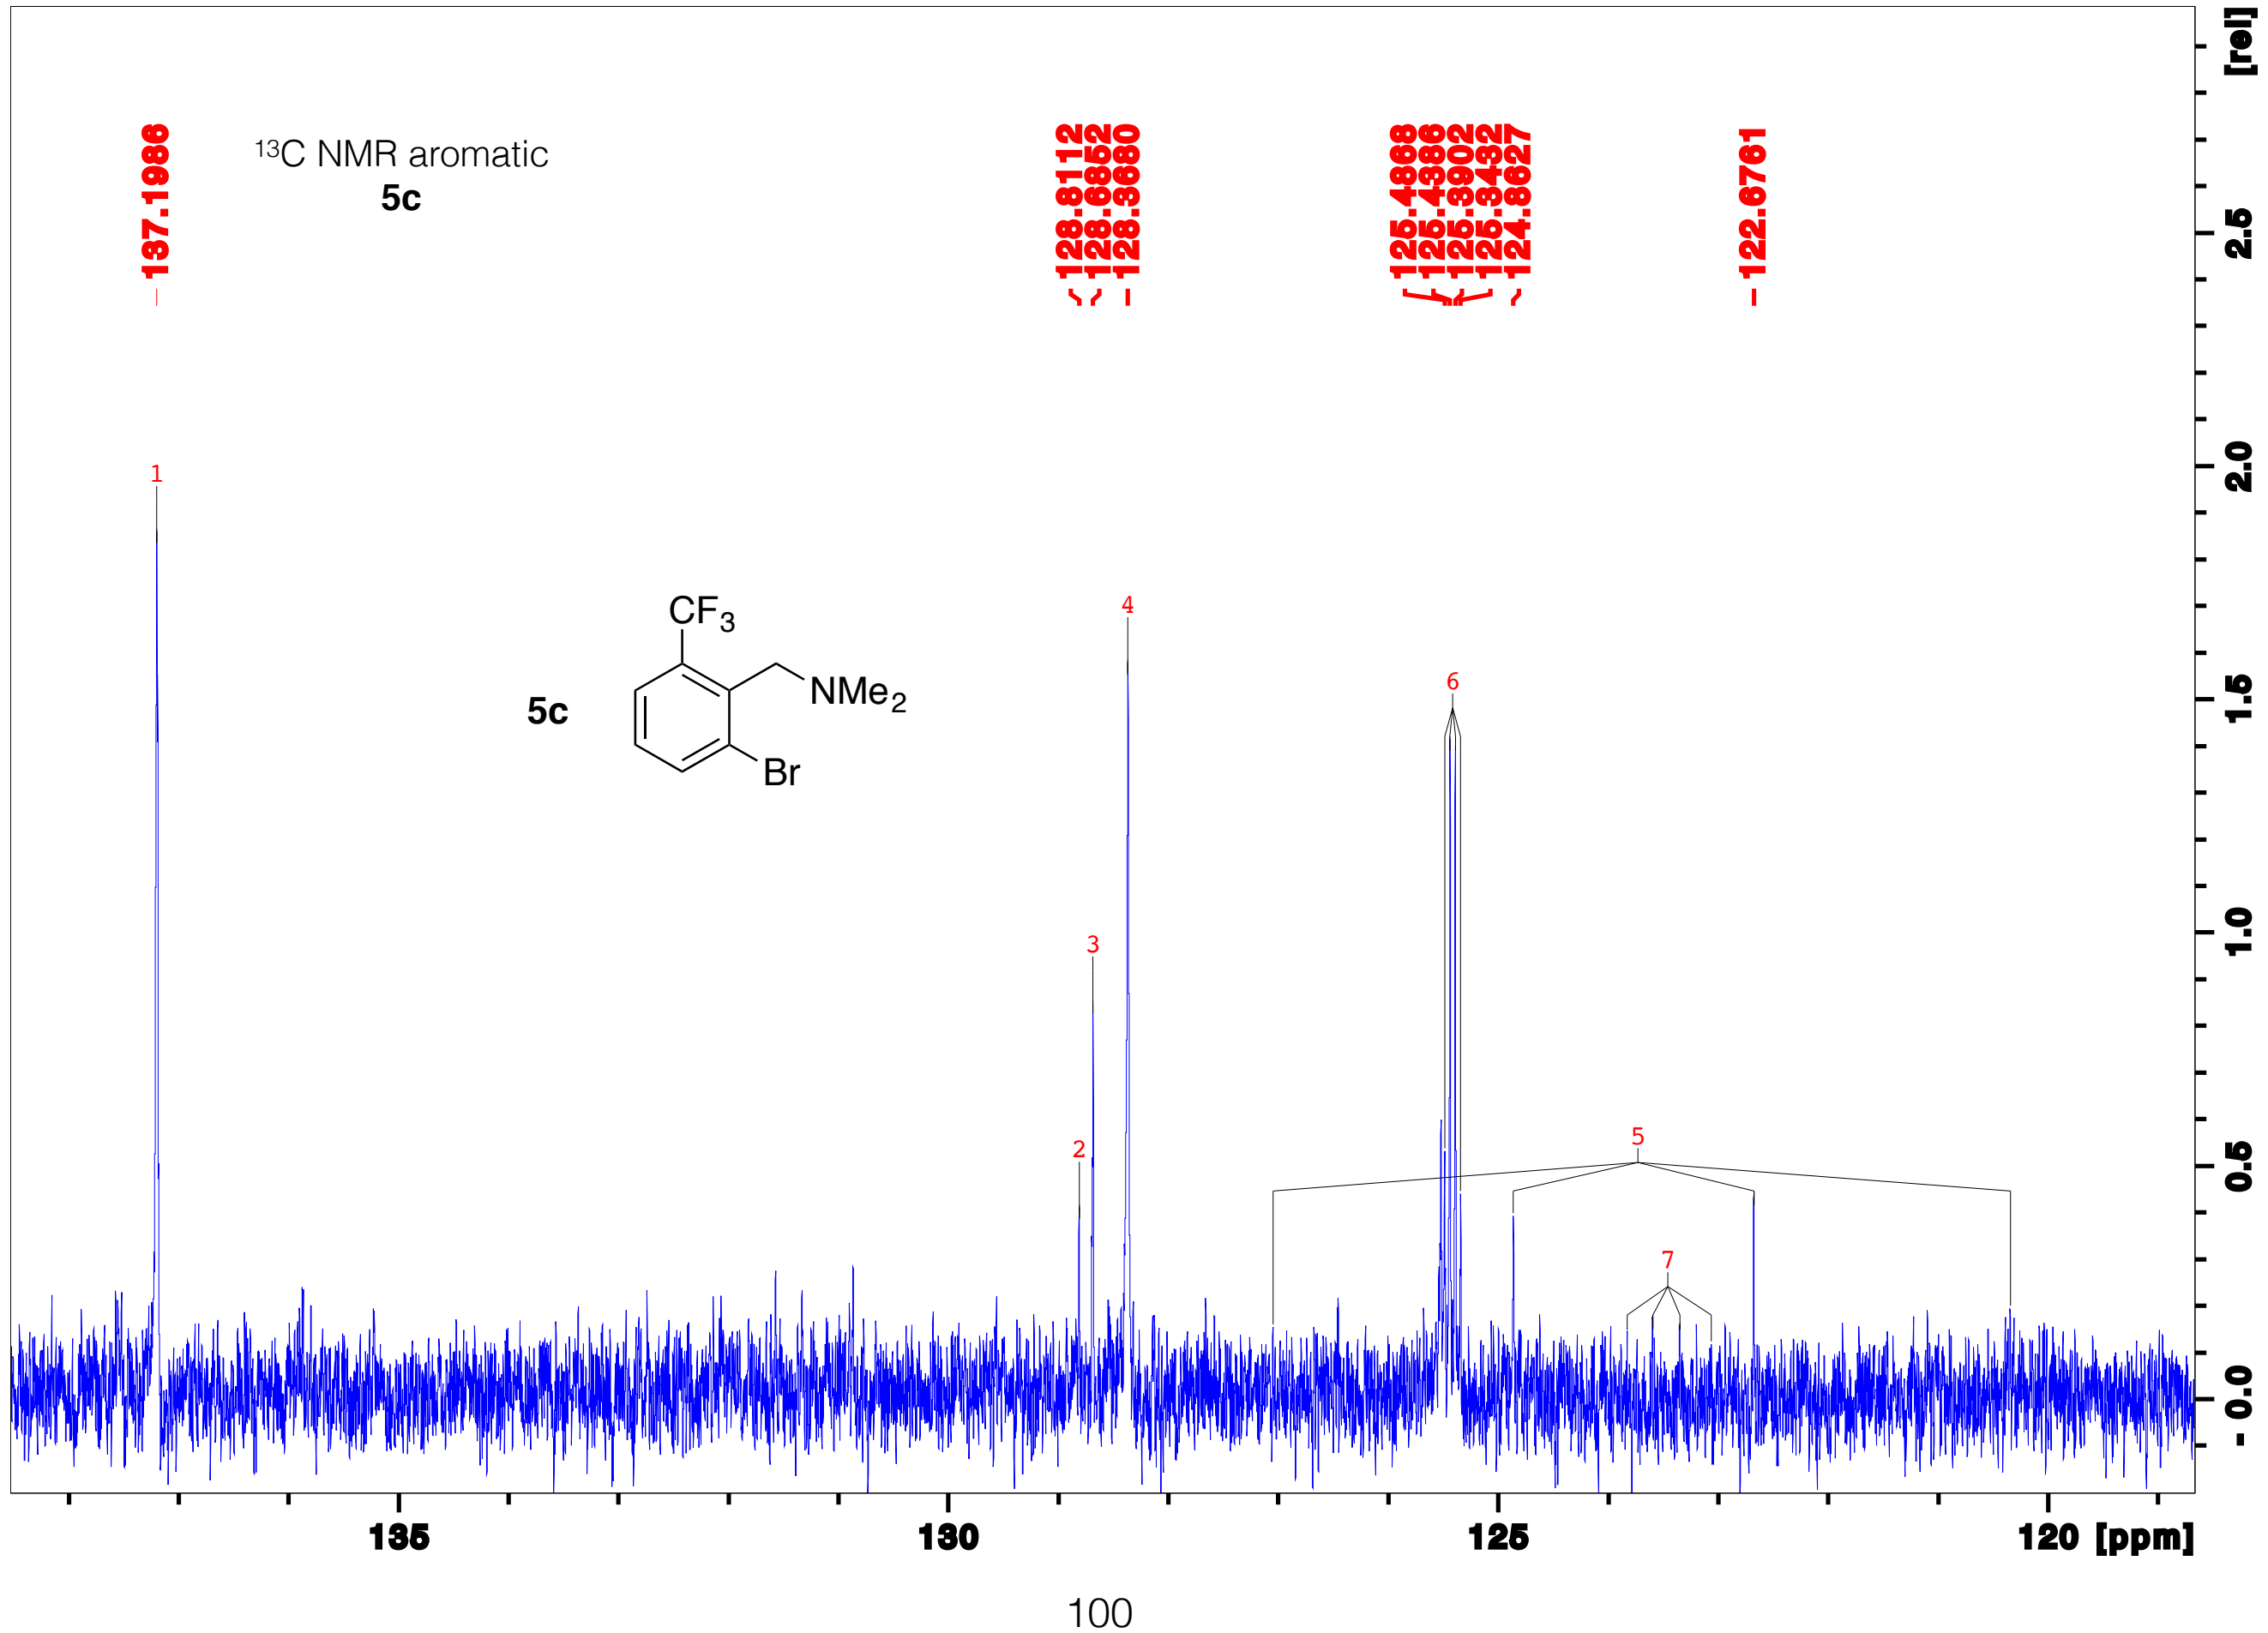



<sup>1</sup>H NMR  
**5d**

8.126  
8.110

7.680  
7.665

7.065  
7.050  
7.034

Current Data Parameters  
NAME JYG07177  
EXPNO 4  
PROCNO 1

3.643

2.288

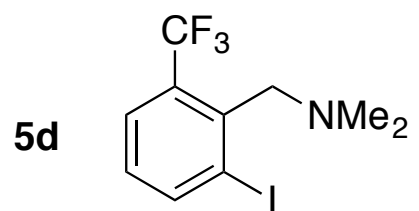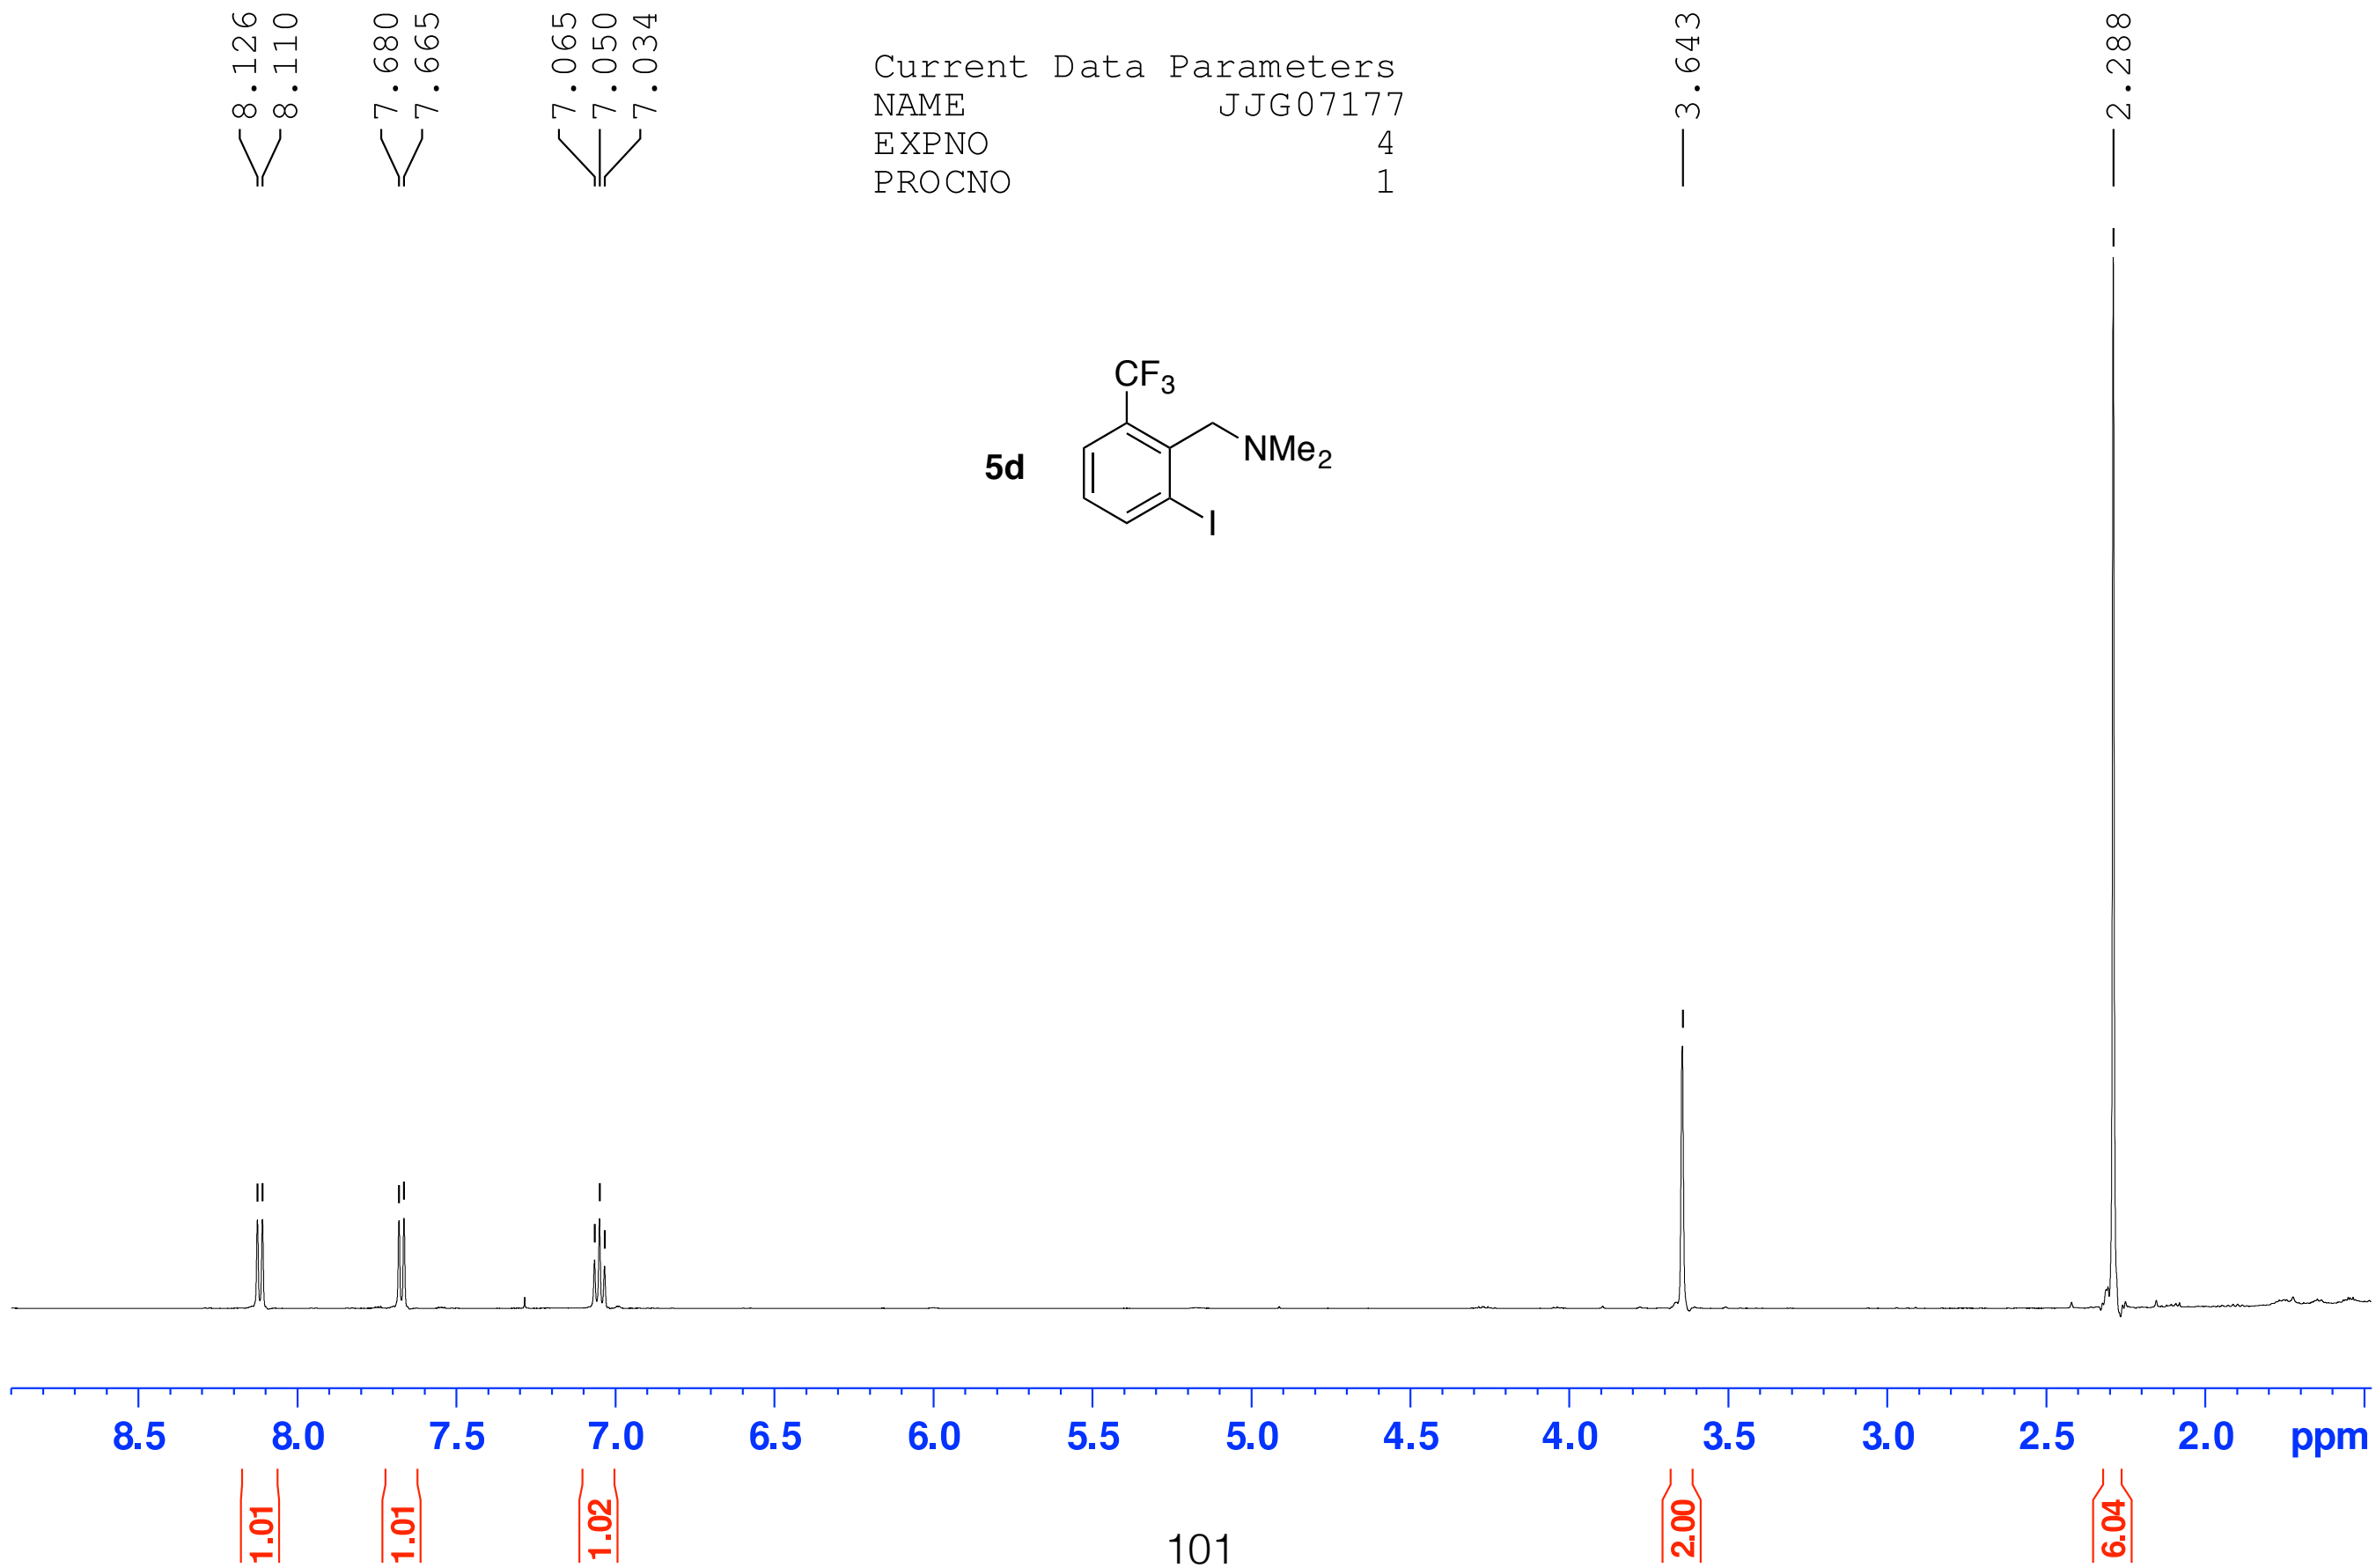

<sup>19</sup>F NMR  
5d

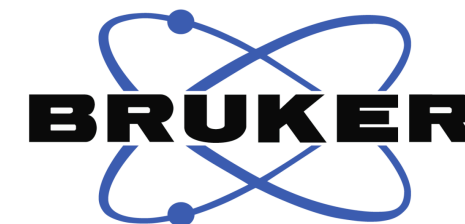

Current Data Parameters  
NAME JYG07177  
EXPNO 6  
PROCNO 1

F2 - Acquisition Parameter  
Date\_ 20160820  
Time 11.16  
INSTRUM spect  
PROBHD 5 mm PABBO BB/  
PULPROG zgflqn  
TD 703112  
SOLVENT CDCl3  
NS 1  
DS 0  
SWH 117187.500 Hz  
FIDRES 0.166670 Hz  
AQ 2.9999444 sec  
RG 118.99  
DW 4.267 usec  
DE 6.50 usec  
TE 295.8 K  
D1 5.00000000 sec  
TD0 1

===== CHANNEL f1 =====  
SFO1 470.3242156 MHz  
NUC1 19F  
P1 15.00 usec  
PLW1 37.79999924 W

F2 - Processing parameters  
SI 262144  
SF 470.3477328 MHz  
WDW no  
SSB 0  
LB 0 Hz  
GB 0  
PC 1.00

-56.938

5d

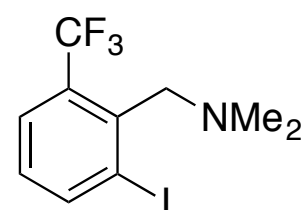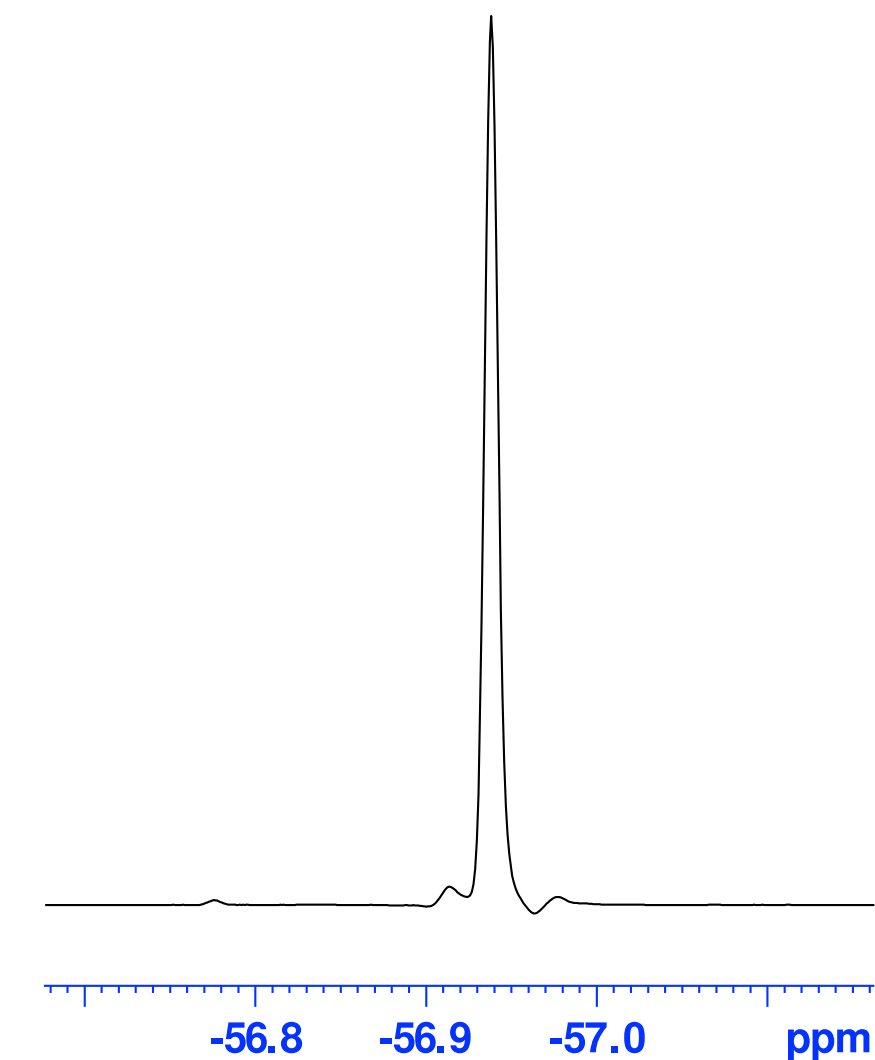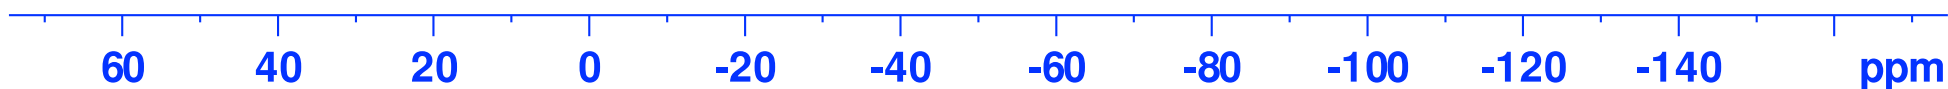

<sup>13</sup>C NMR

5d

JJG07177 7 1 "/Users/joe/Dropbox/Grad/NMR Backups"

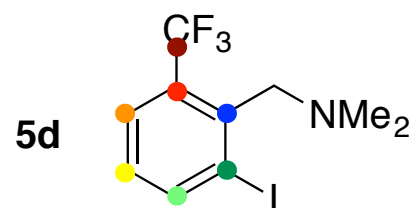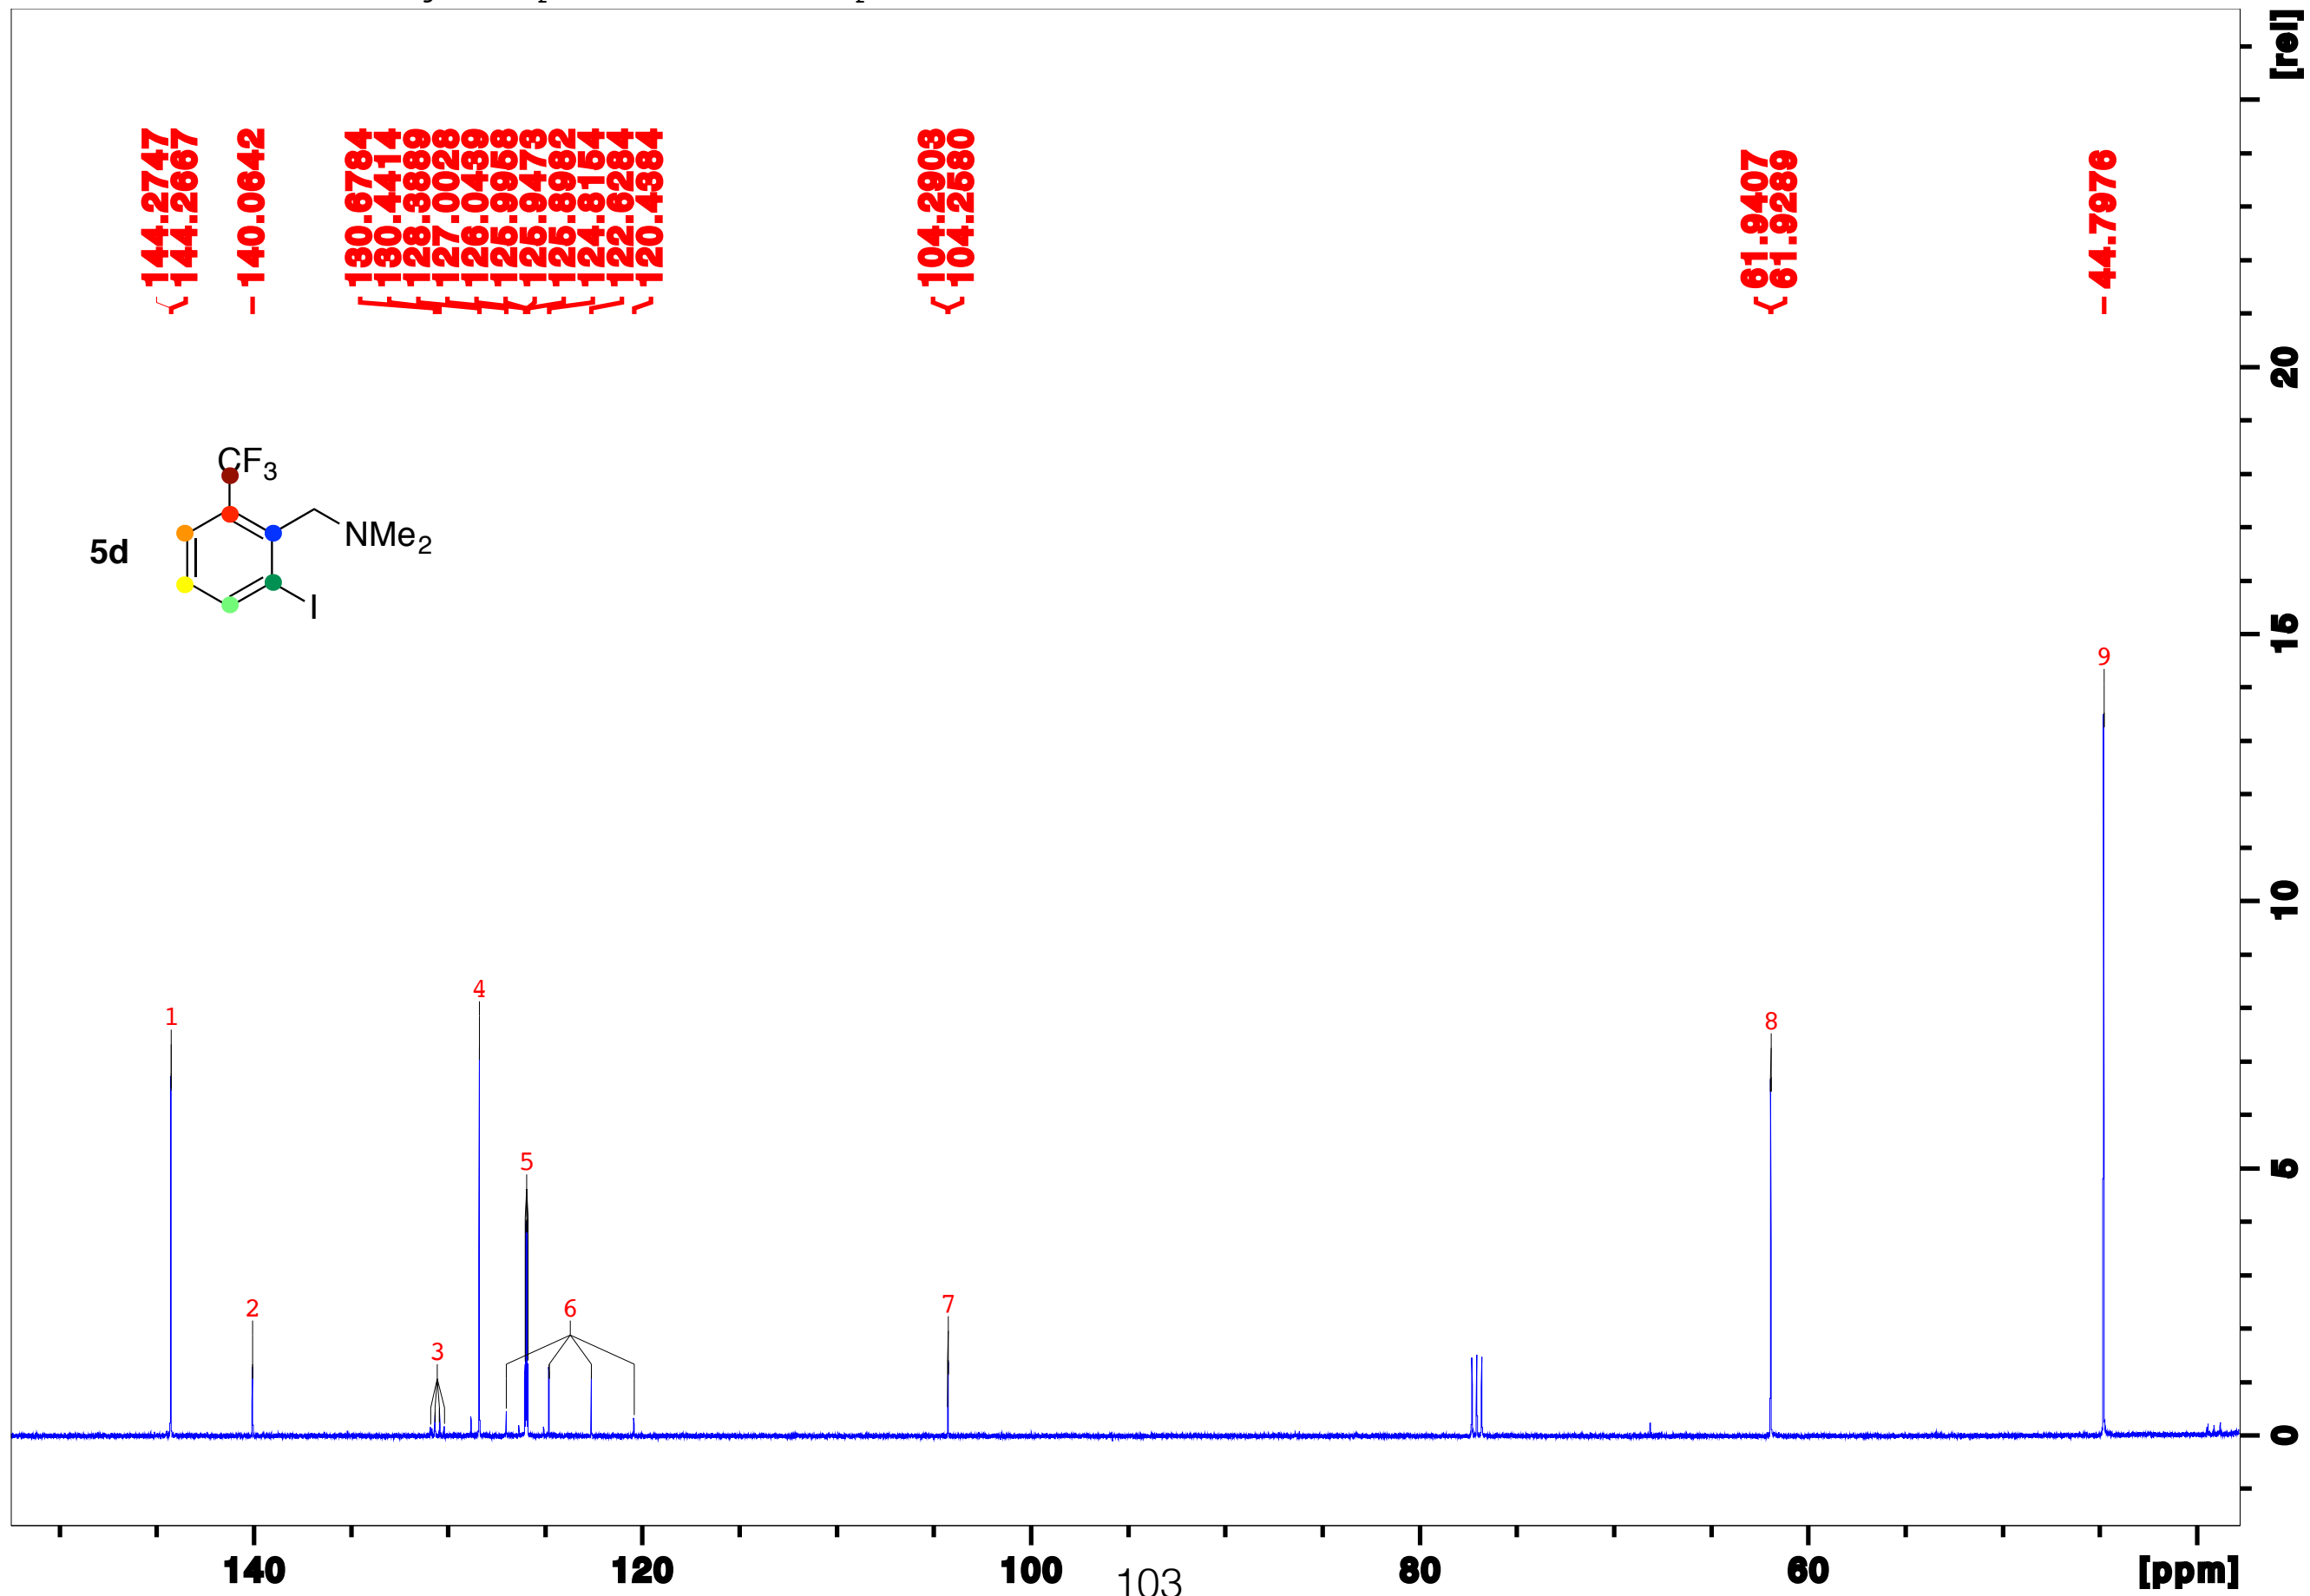

**5d**

JJG07177 7 1 "/Users/joe/Dropbox/Grad/NMR Backups"

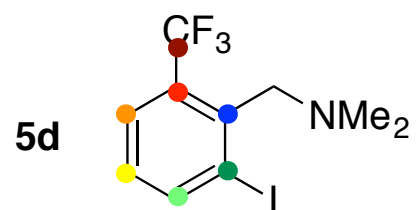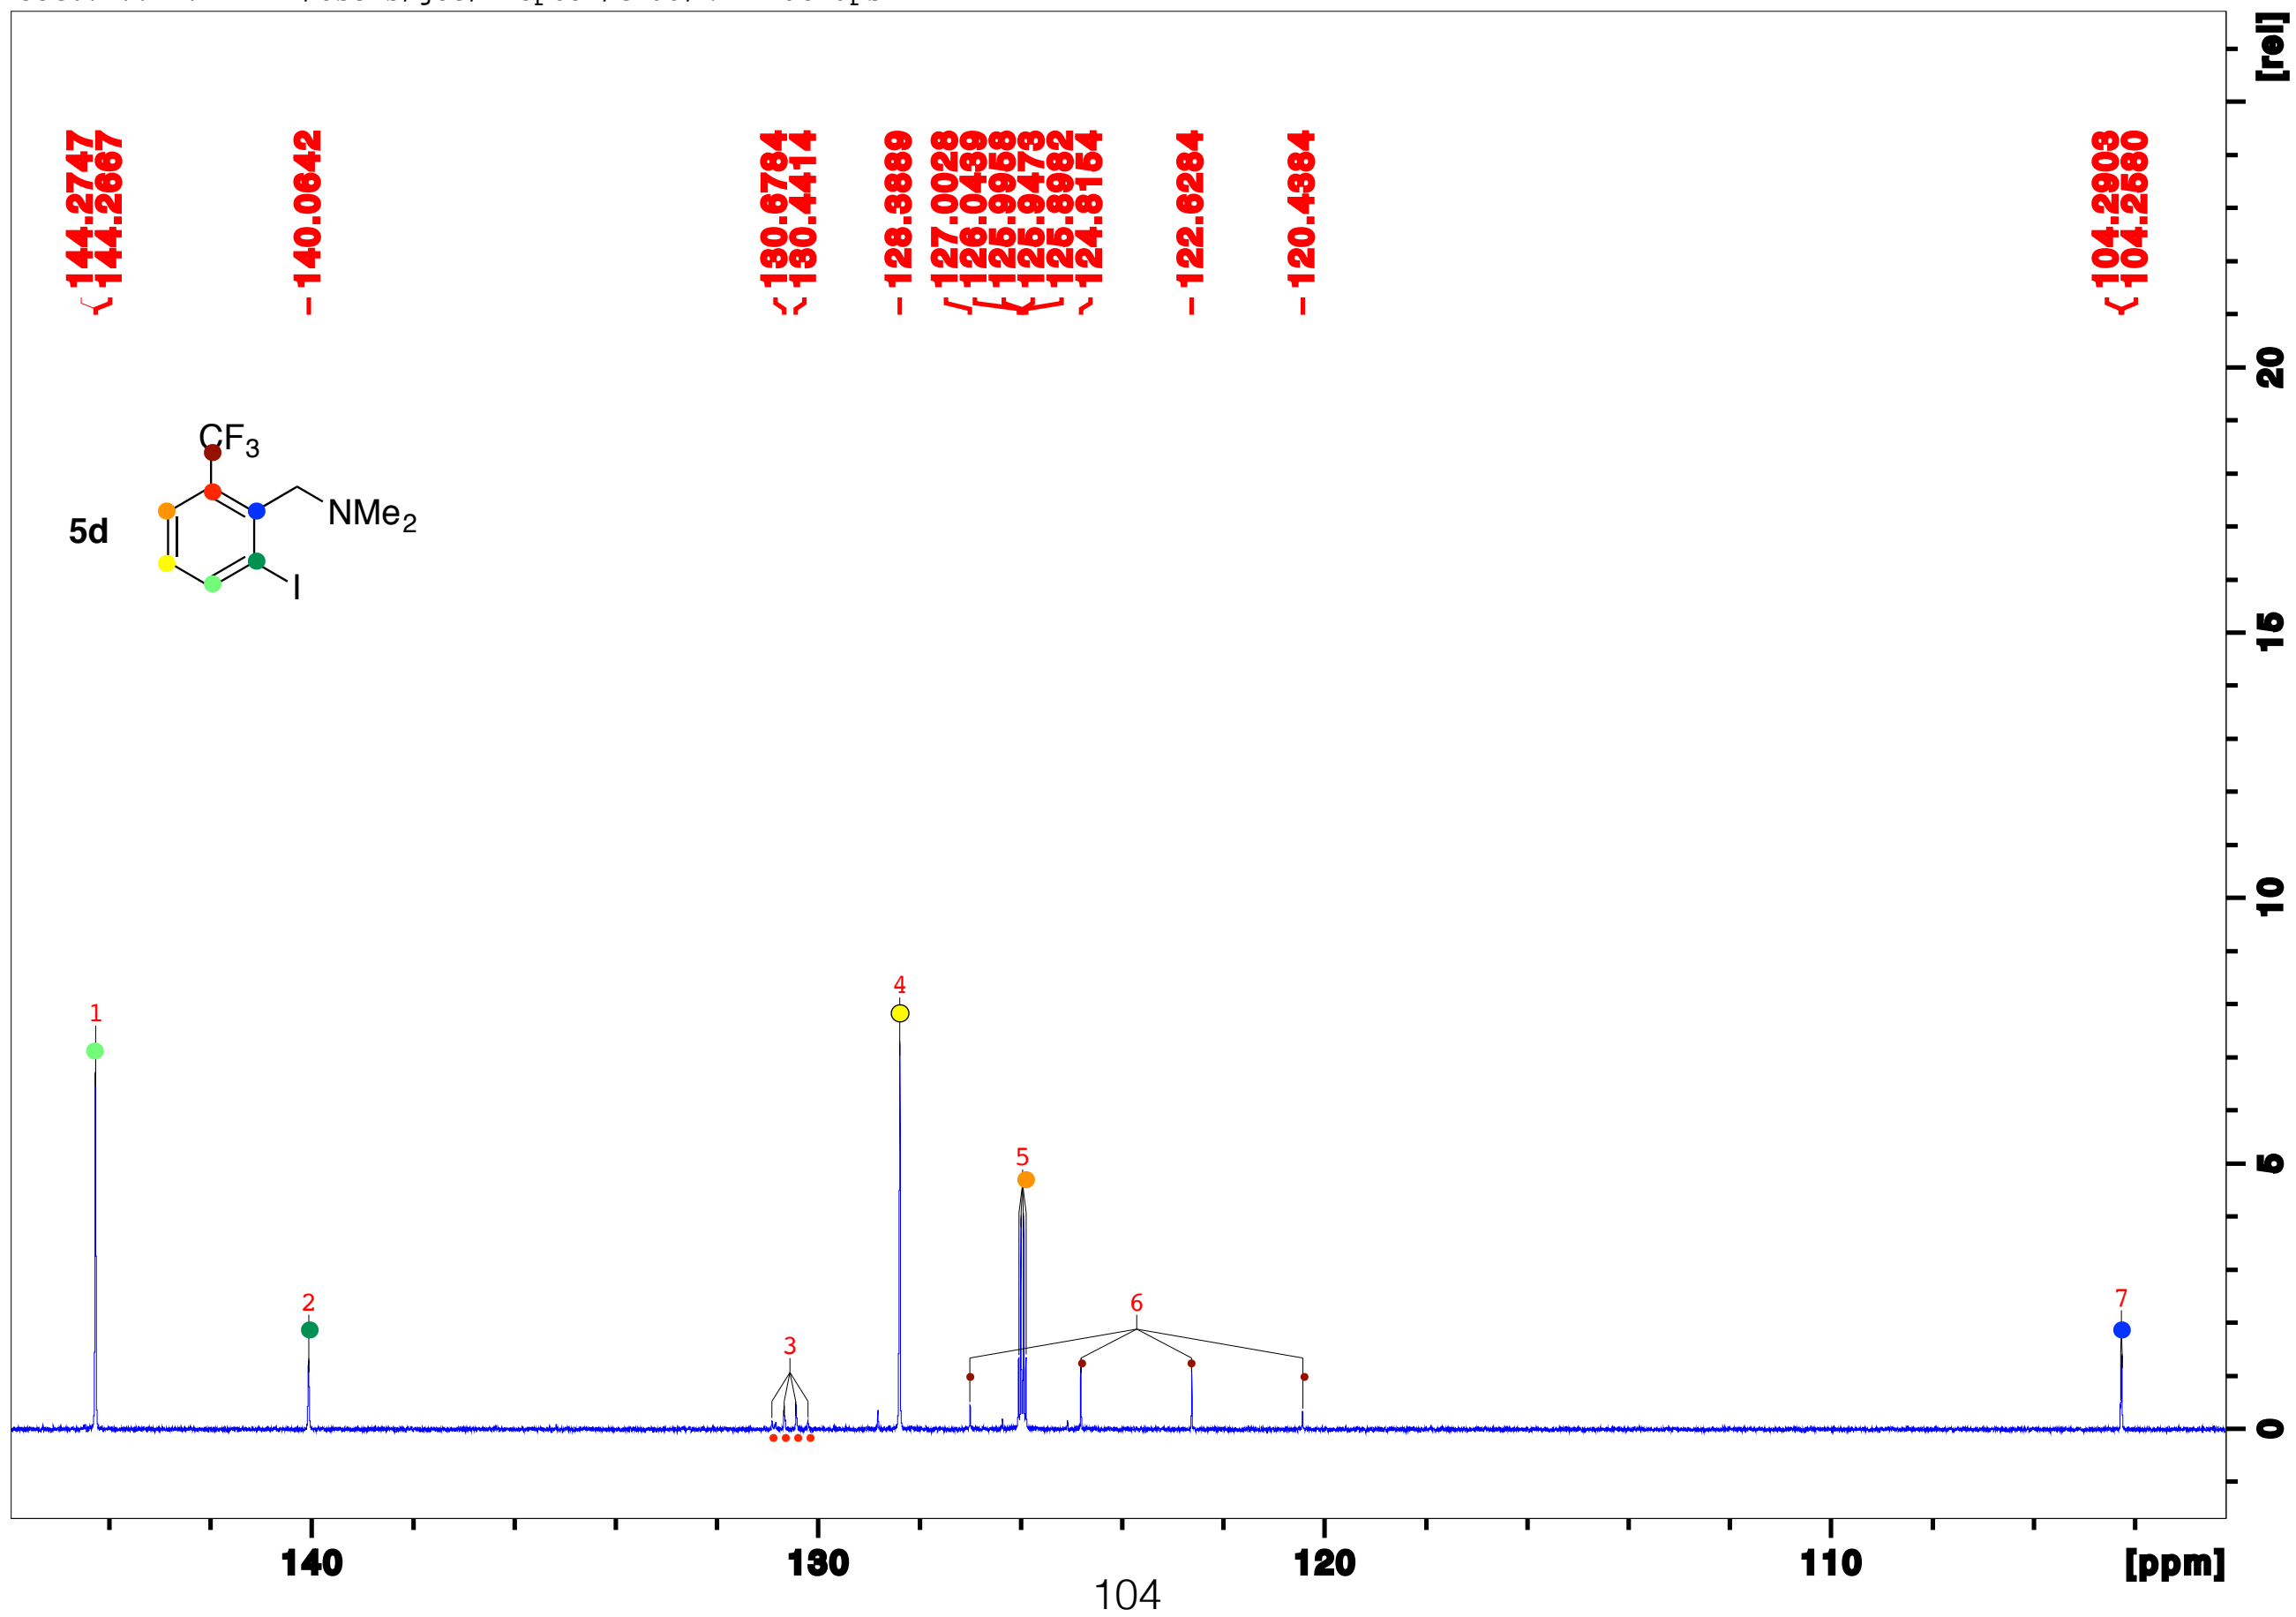

HMQC  
5d

JJG07177 8 1 "/Users/joe/Dropbox/Grad/NMR Backups"

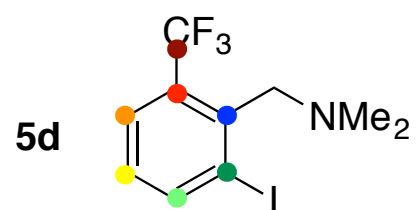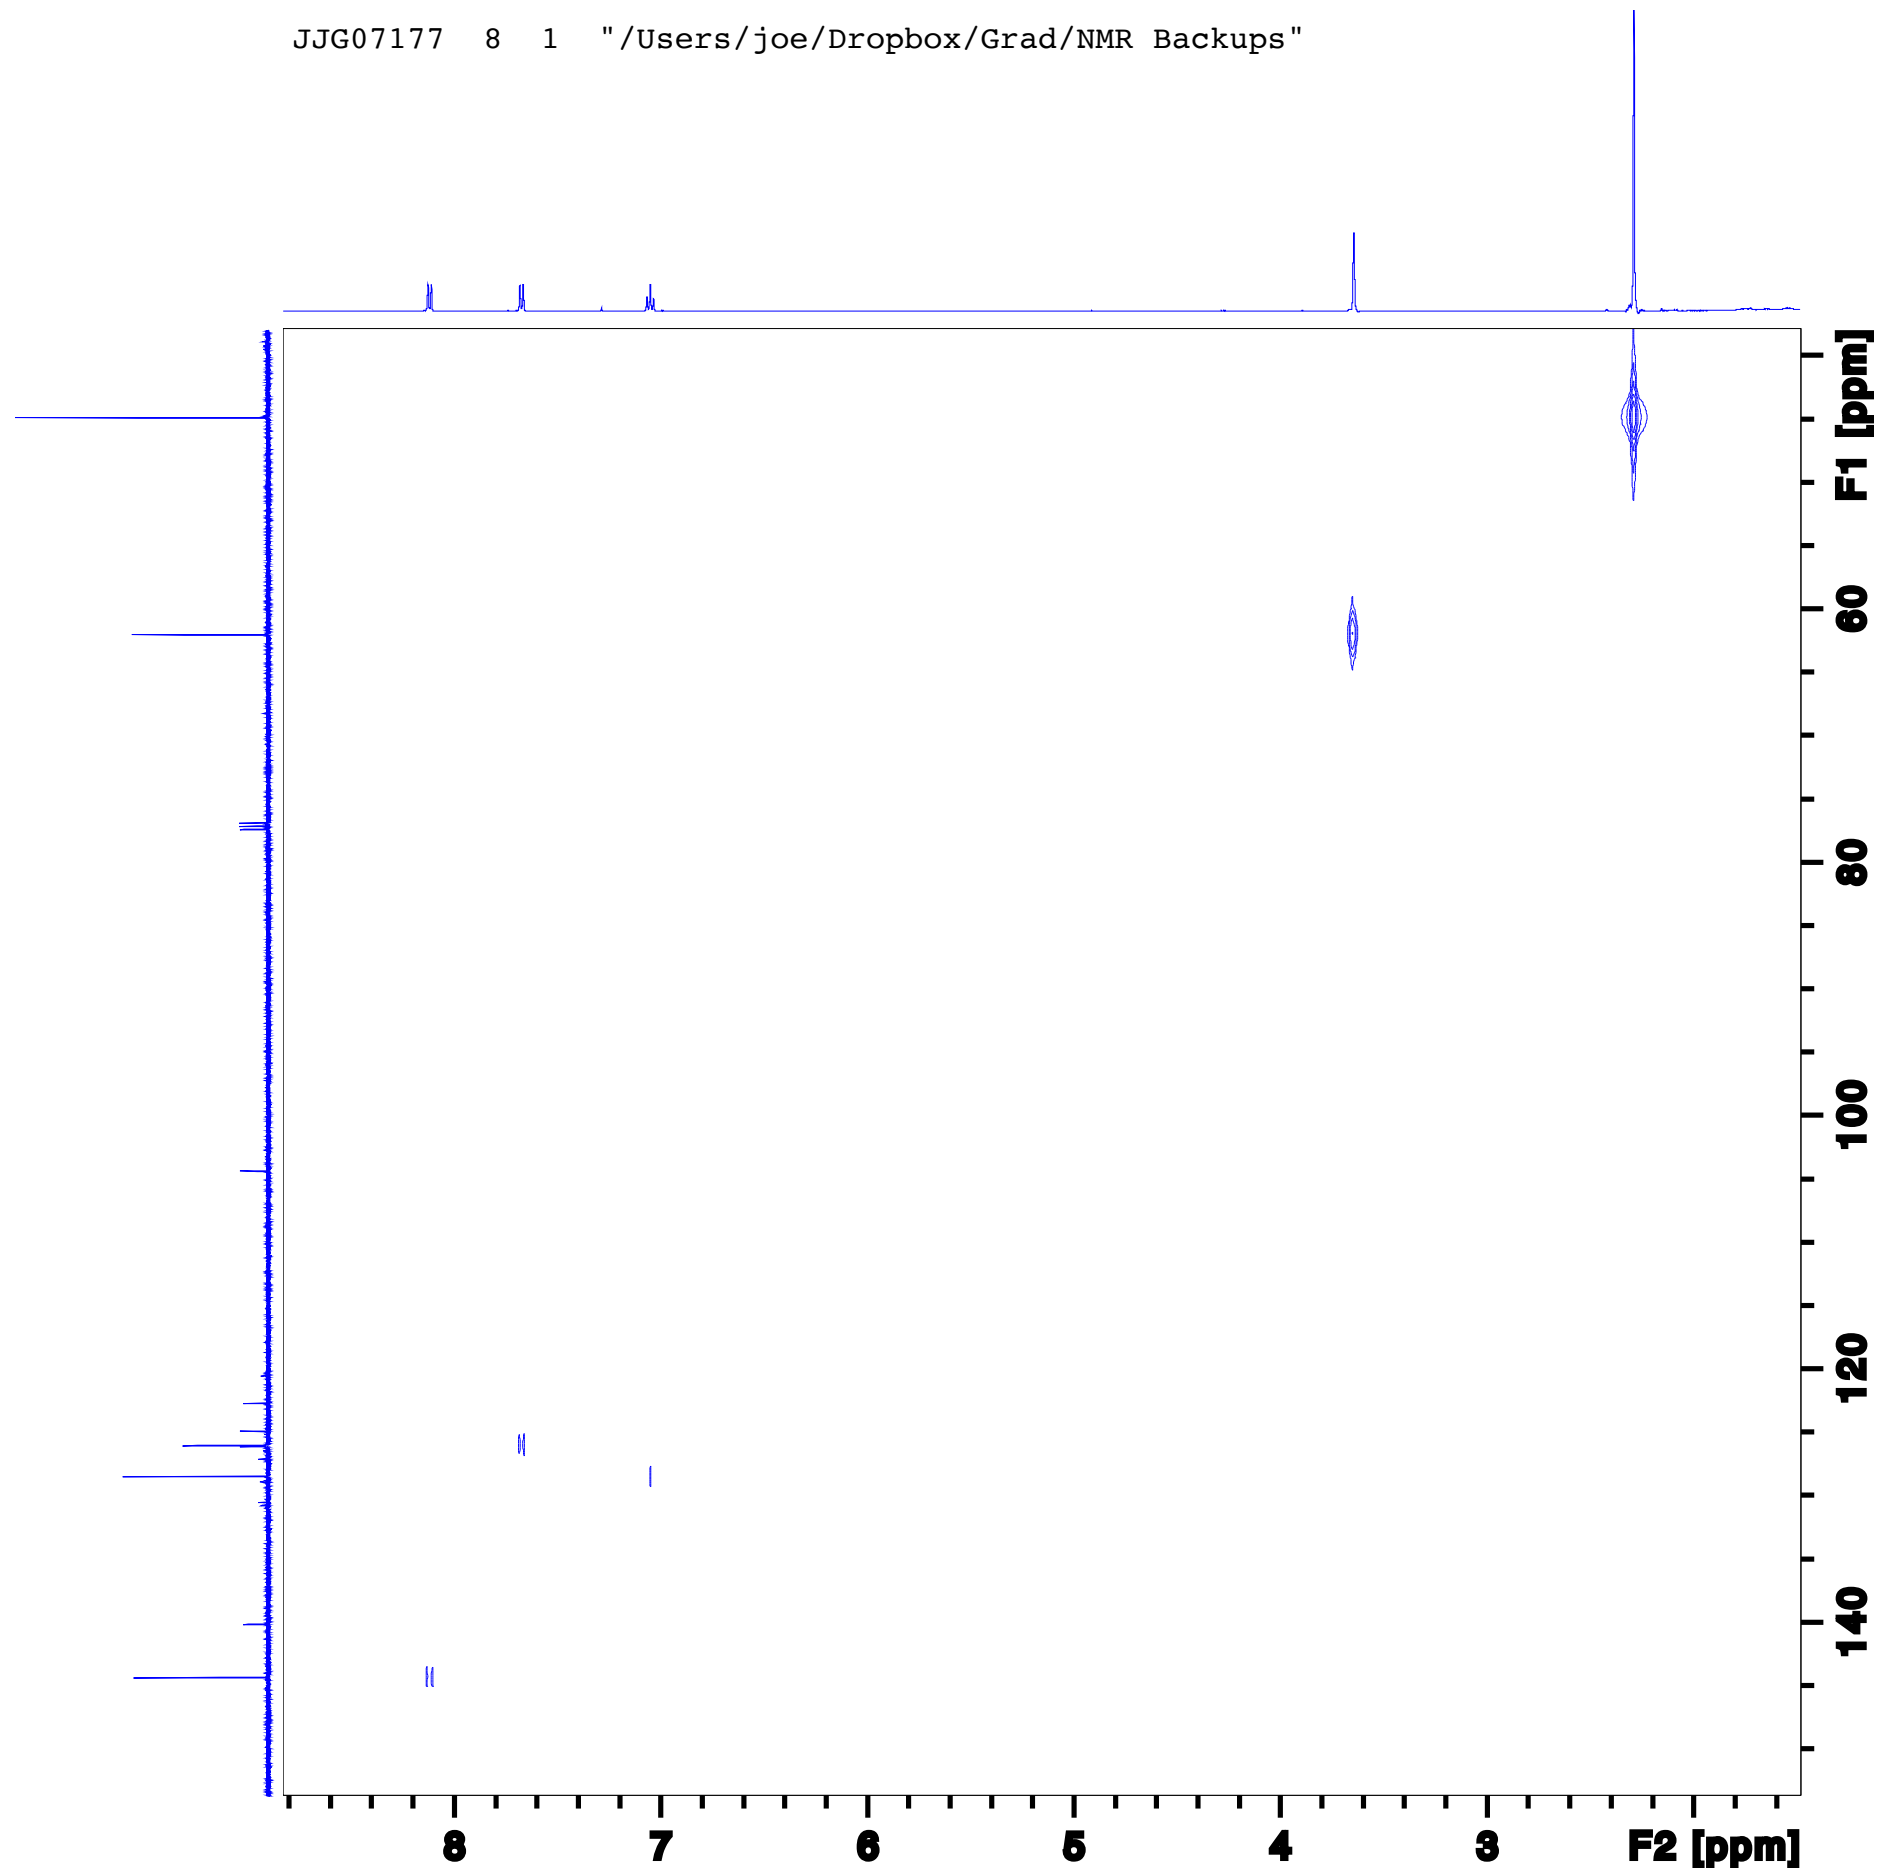

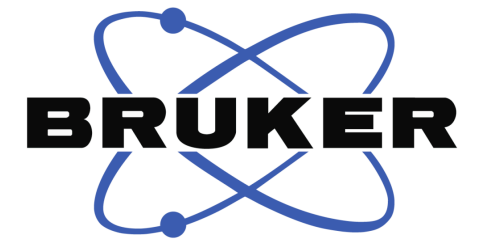

<sup>1</sup>H NMR in CDCl<sub>3</sub>  
2 [Pd(dmba)(NAc-Gly)]<sub>2</sub>

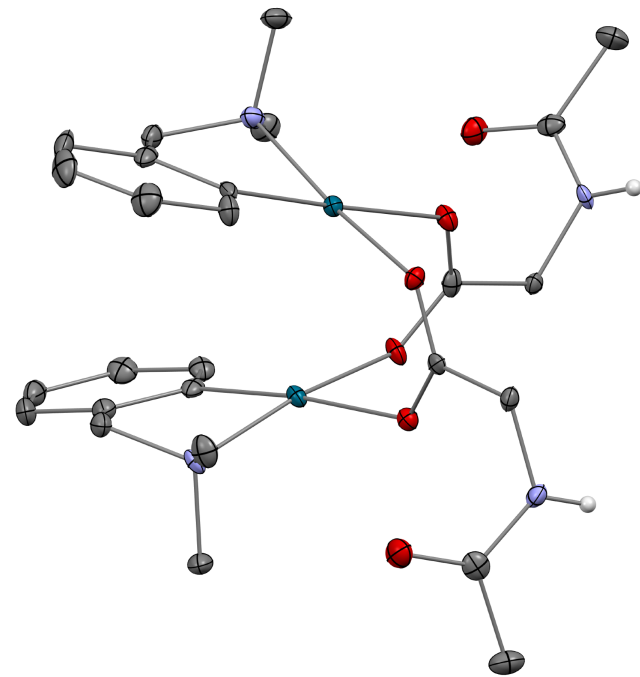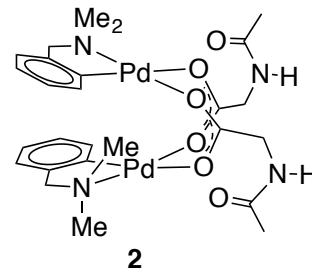

Current Data Parameters  
NAME JYG08091  
EXPNO 4  
PROCNO 1

F2 - Acquisition Parameter  
Date\_ 20160916  
Time 12.15  
INSTRUM spect  
PROBHD 5 mm PATXI 1H/  
PULPROG zg  
TD 59998  
SOLVENT CDCl<sub>3</sub>  
NS 1  
DS 0  
SWH 10000.000 Hz  
FIDRES 0.166672 Hz  
AQ 2.9999001 sec  
RG 196.79  
DW 50.000 usec  
DE 10.00 usec  
TE 293.5 K  
D1 10.00000000 sec  
TD0 1

==== CHANNEL f1 =====  
SFO1 500.1330885 MHz  
NUC1 1H  
P1 8.00 usec  
PLW1 12.19999981 W

F2 - Processing parameters  
SI 65536  
SF 500.1300000 MHz  
WDW no  
SSB 0  
LB 0 Hz  
GB 0  
PC 1.00

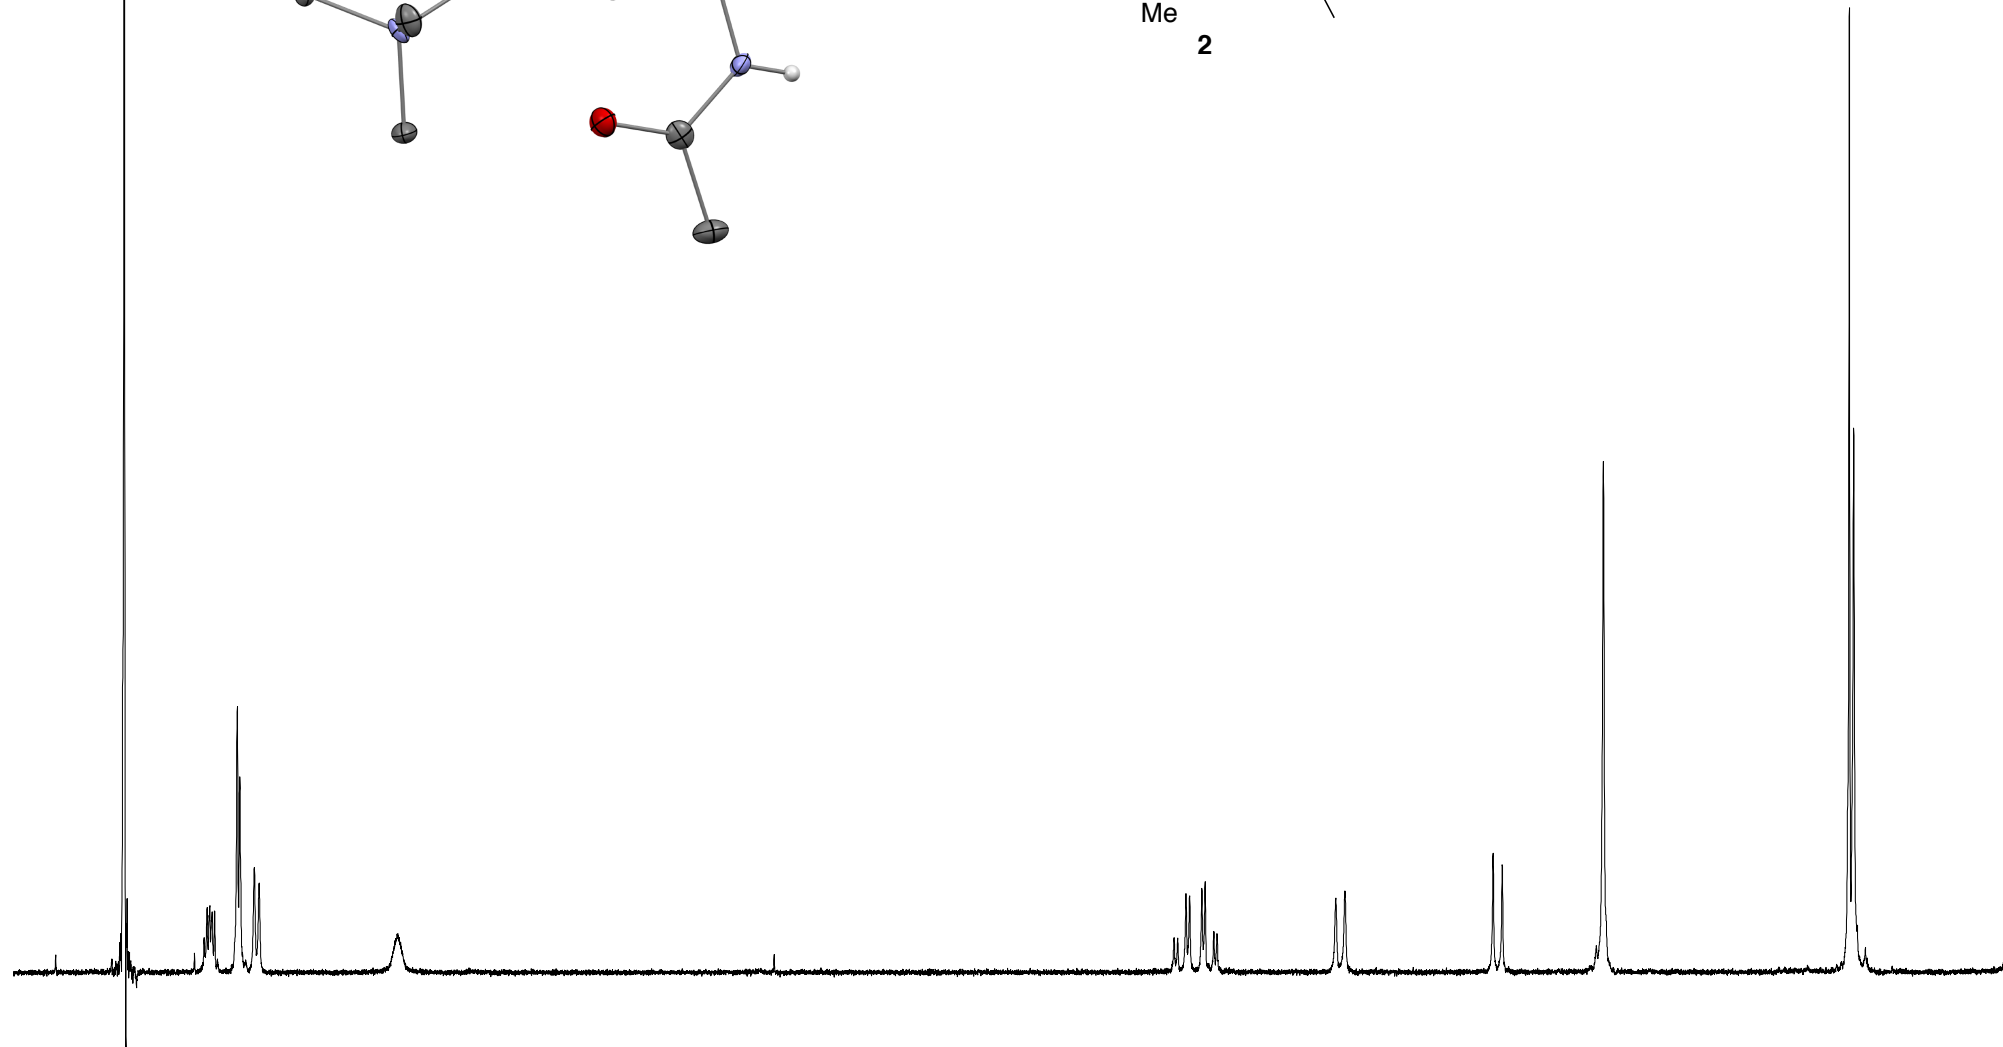

7.5 7.0 6.5 6.0 5.5 5.0 4.5 4.0 3.5 3.0 2.5 ppm

6.00

2.07

1.81

4.00

2.02

2.03

6.04

12.01

106

$^1\text{H}$  NMR in  $\text{CD}_2\text{Cl}_2$   
**2**  $[\text{Pd}(\text{dmba})(\text{NAc-Gly})]_2$

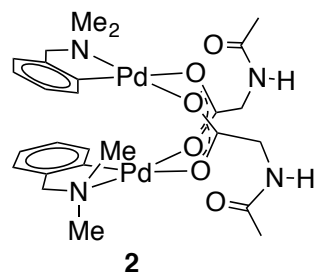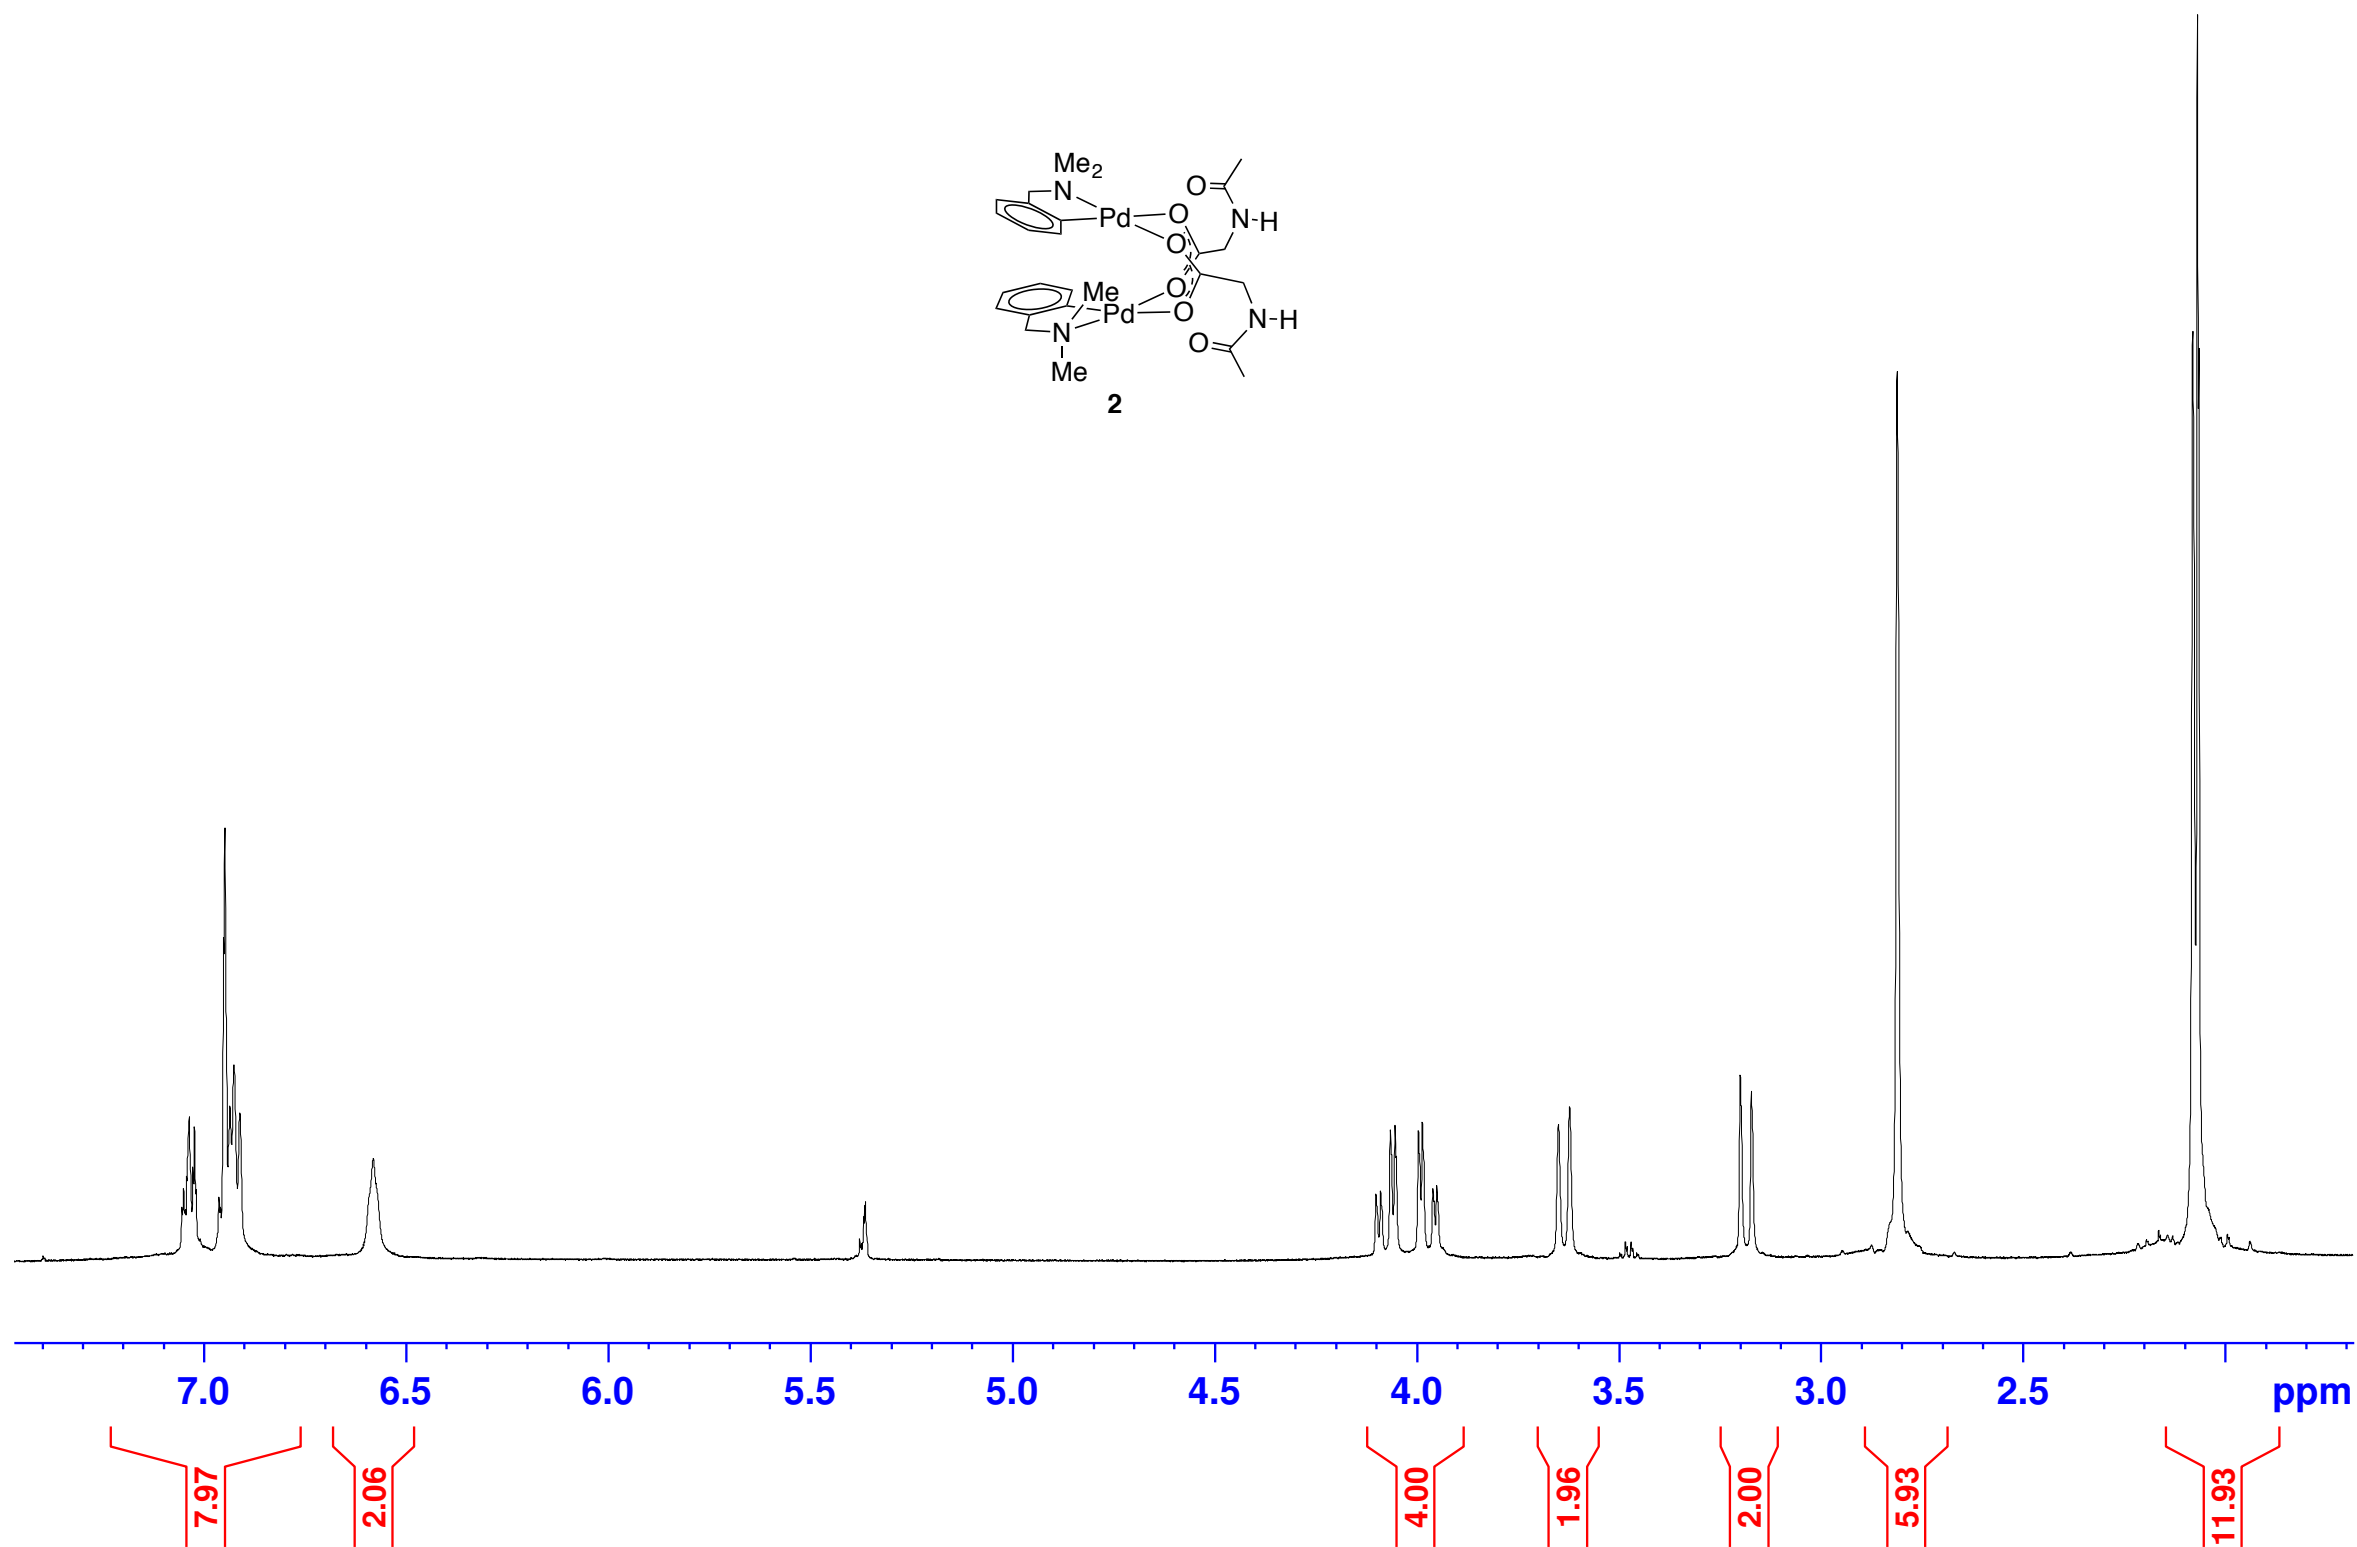

$^1\text{H}$  NMR in THF- $d_8$   
**2**  $[\text{Pd}(\text{dmba})(\text{NAc-Gly})]_2$

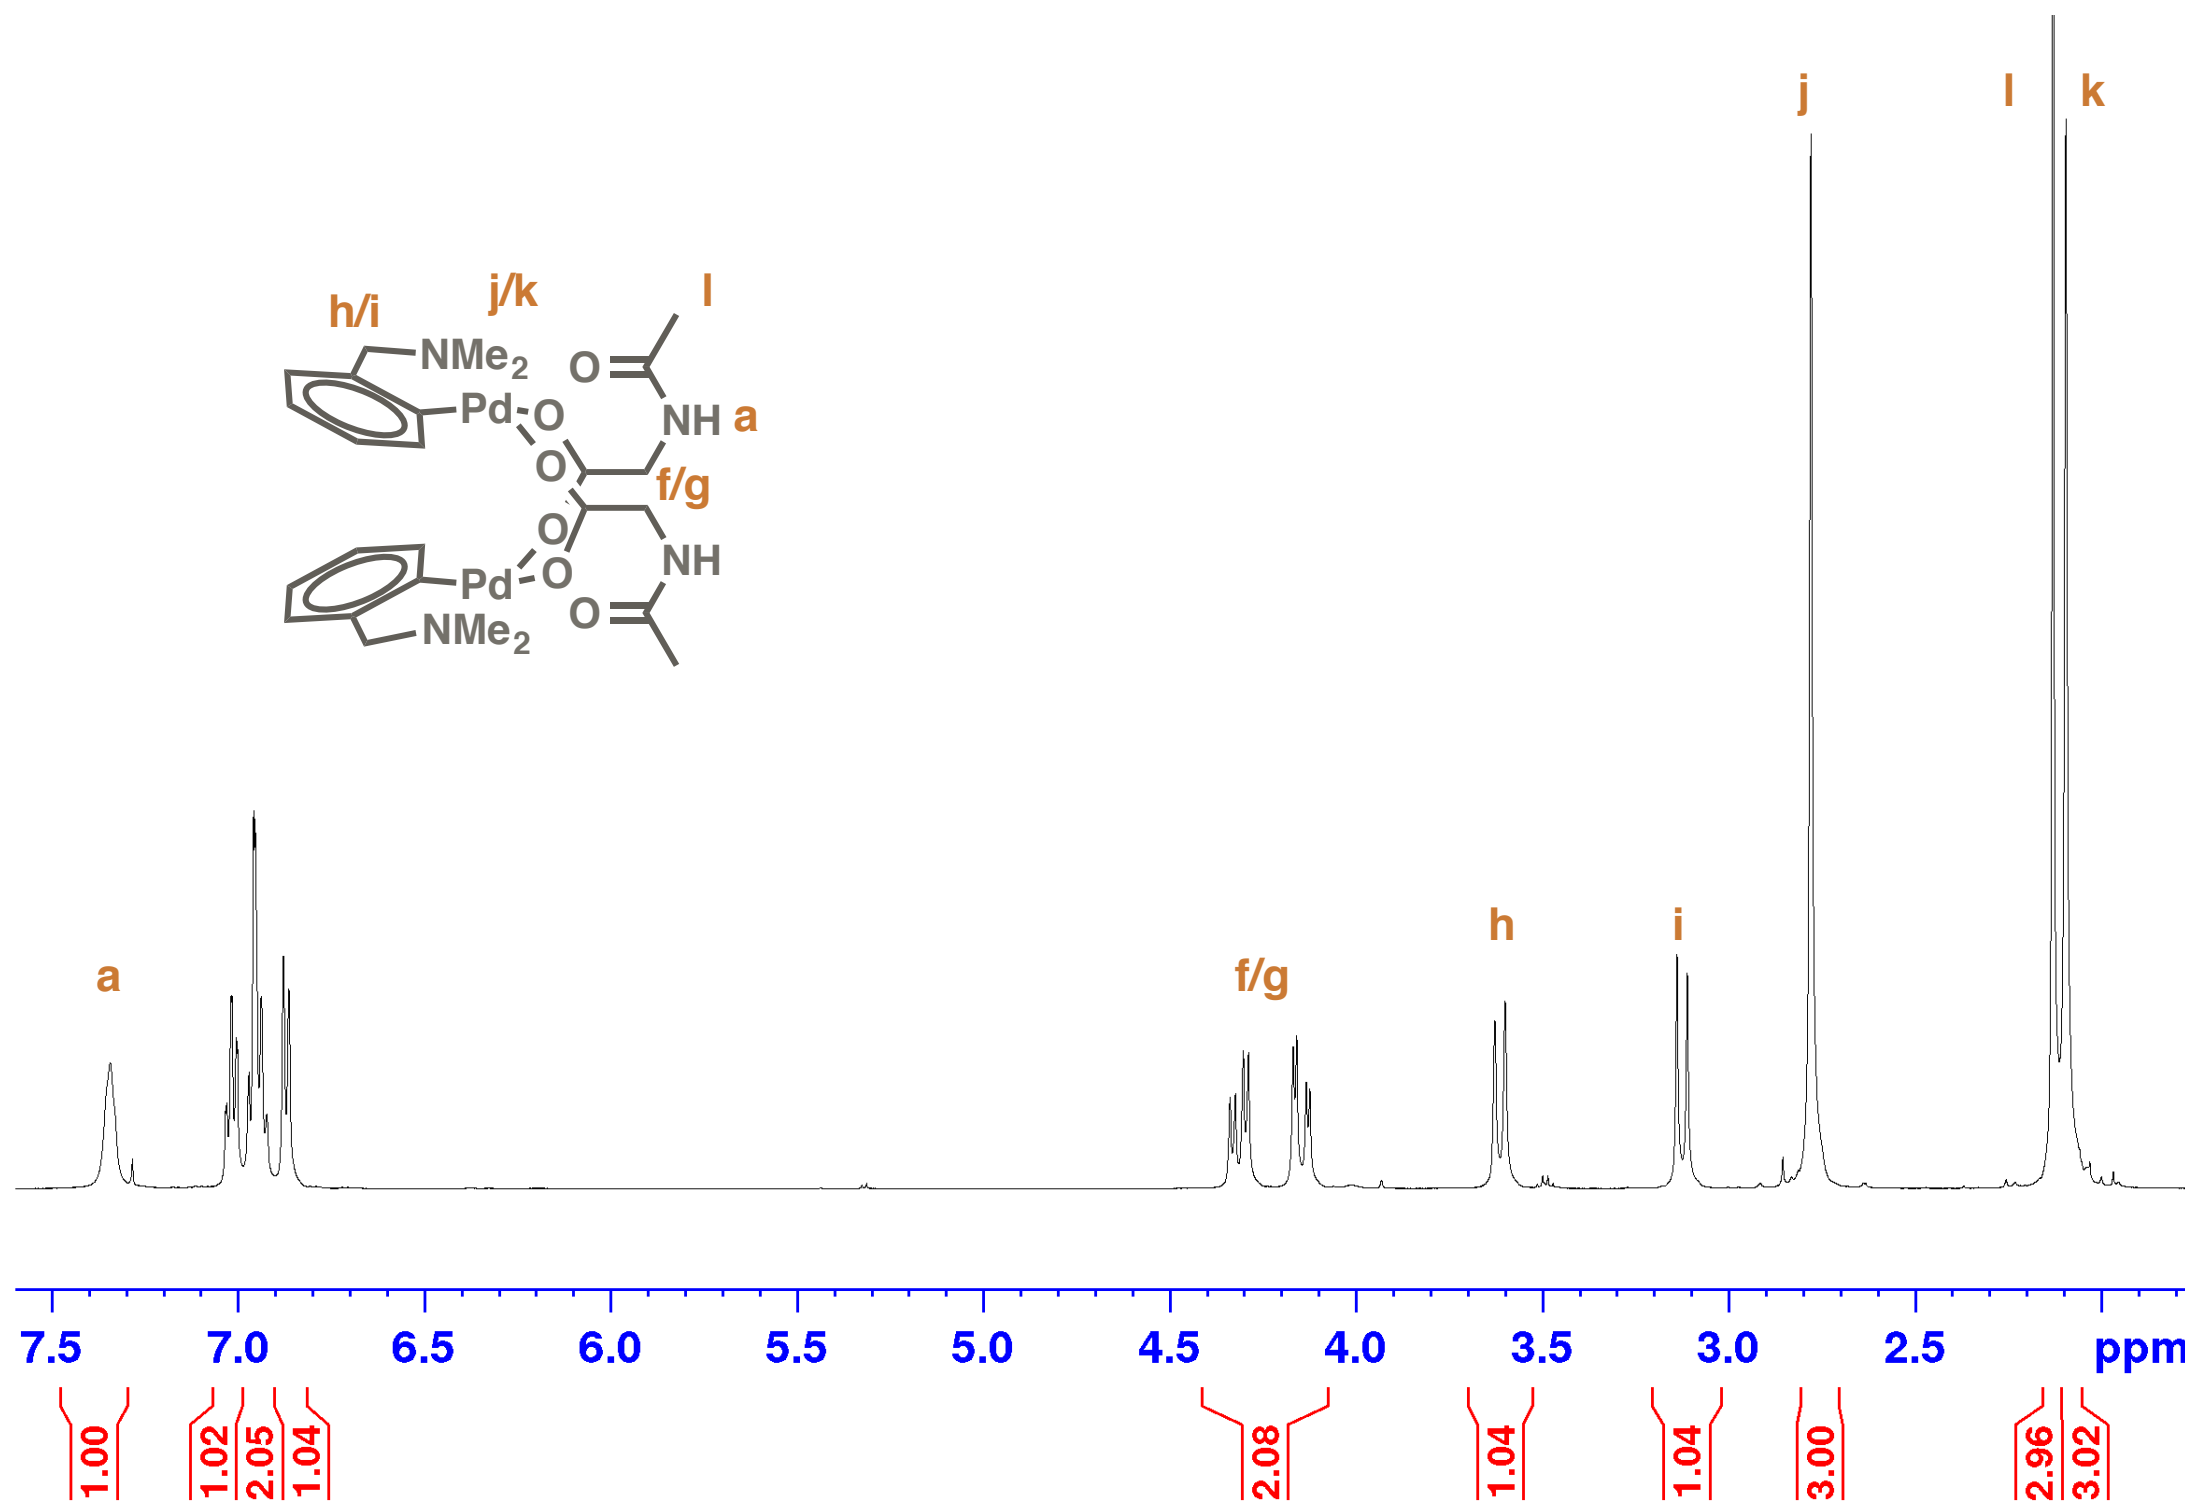



NOESY in THF-d<sub>8</sub>  
2 [Pd(dmba)(NAc-Gly)]<sub>2</sub>

JJG03016 4 1 /opt/topspin/data/jgair/nmr

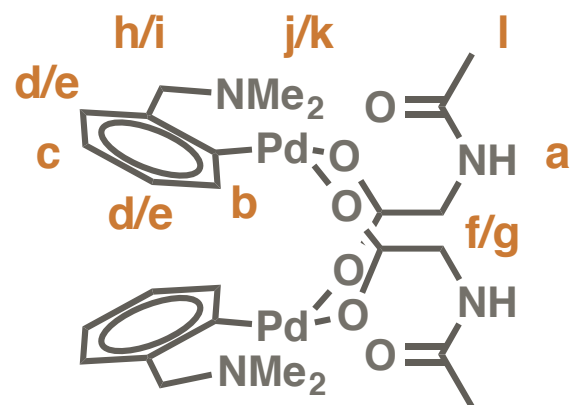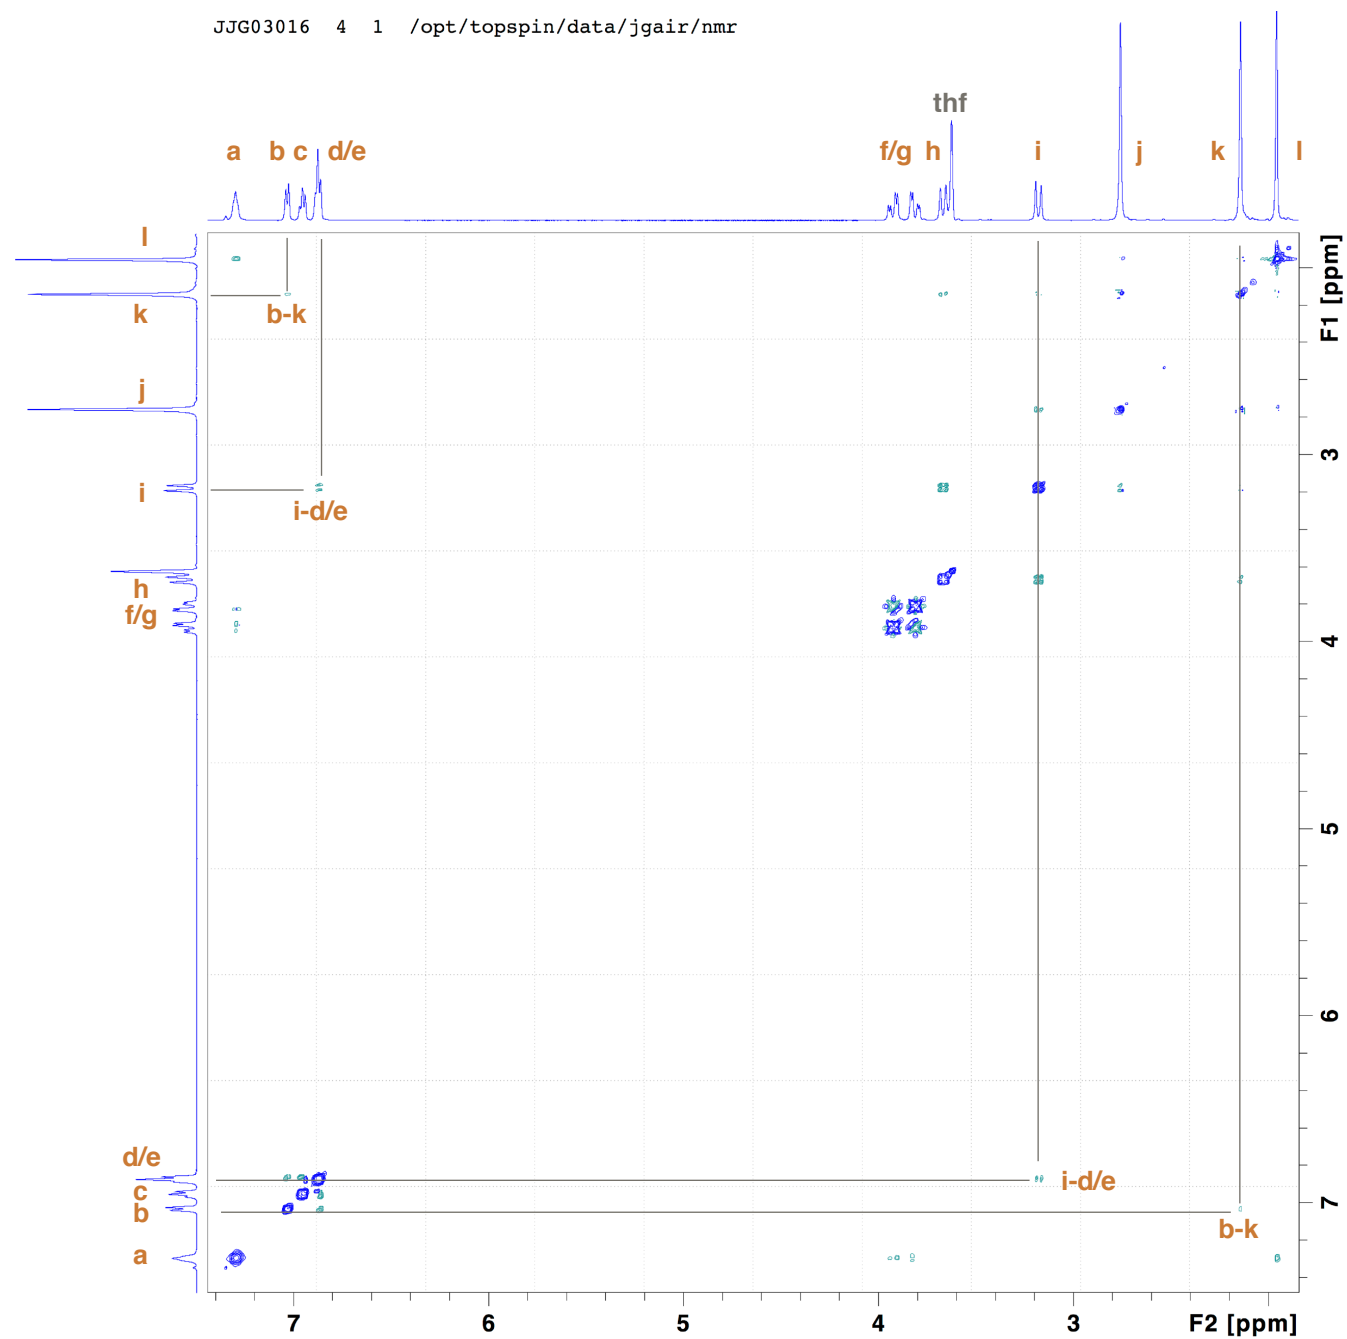

Supplement: SC-008-C7SC01674C-s002.pdf [file SC-008-C7SC01674C-s002.pdf]
