# Supplementary material for: Mono-N-protected amino acid ligands stabilize dimeric palladium(ii) complexes of importance to C–H functionalization
Source: PubMed Central journal article supplement — Chem Sci. 2017 Jun 16;8(8):5746–56. doi: 10.1039/c7sc01674c (PMC5859881; doi:10.1039/c7sc01674c), 2017-06-16

# Annotated Mass Spectra

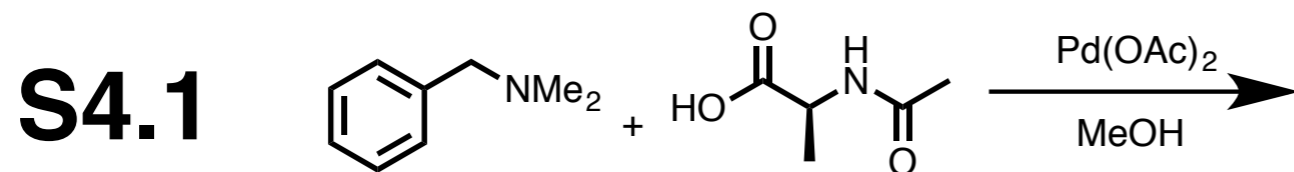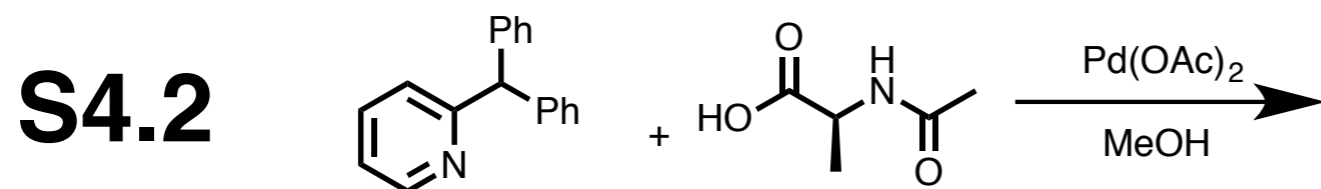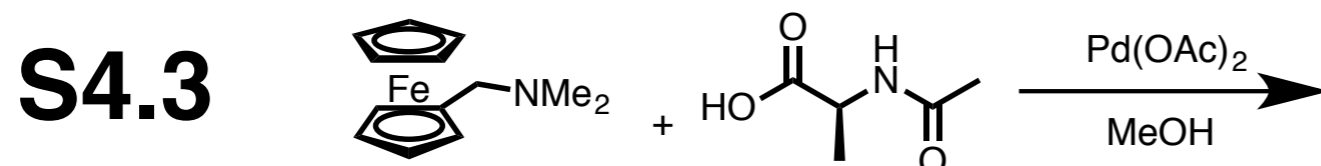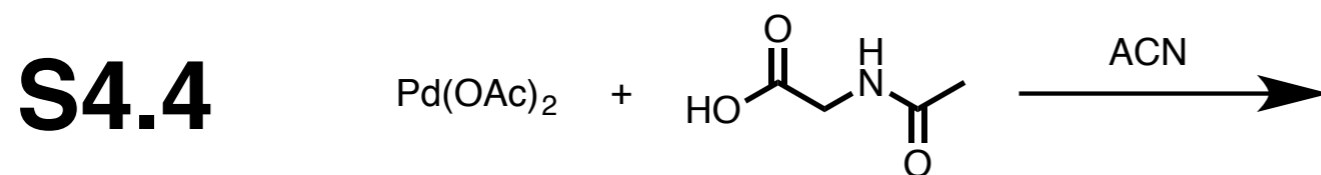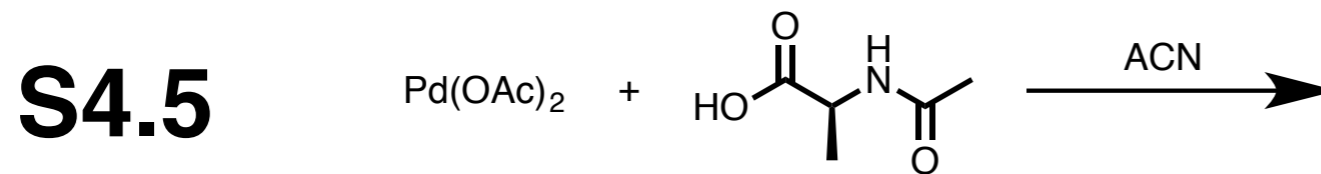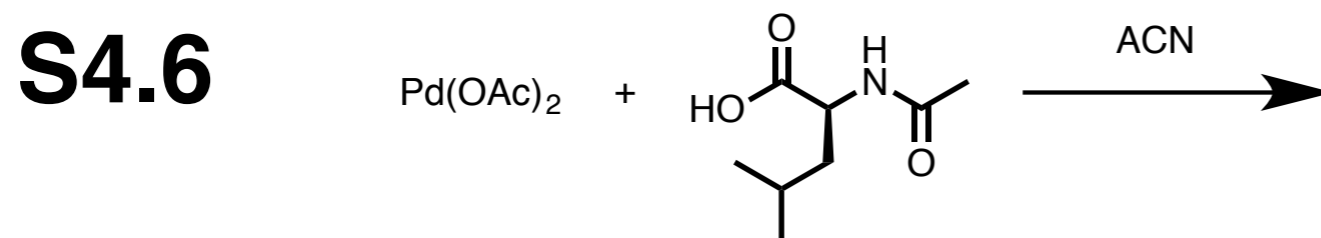

## S4.1.1

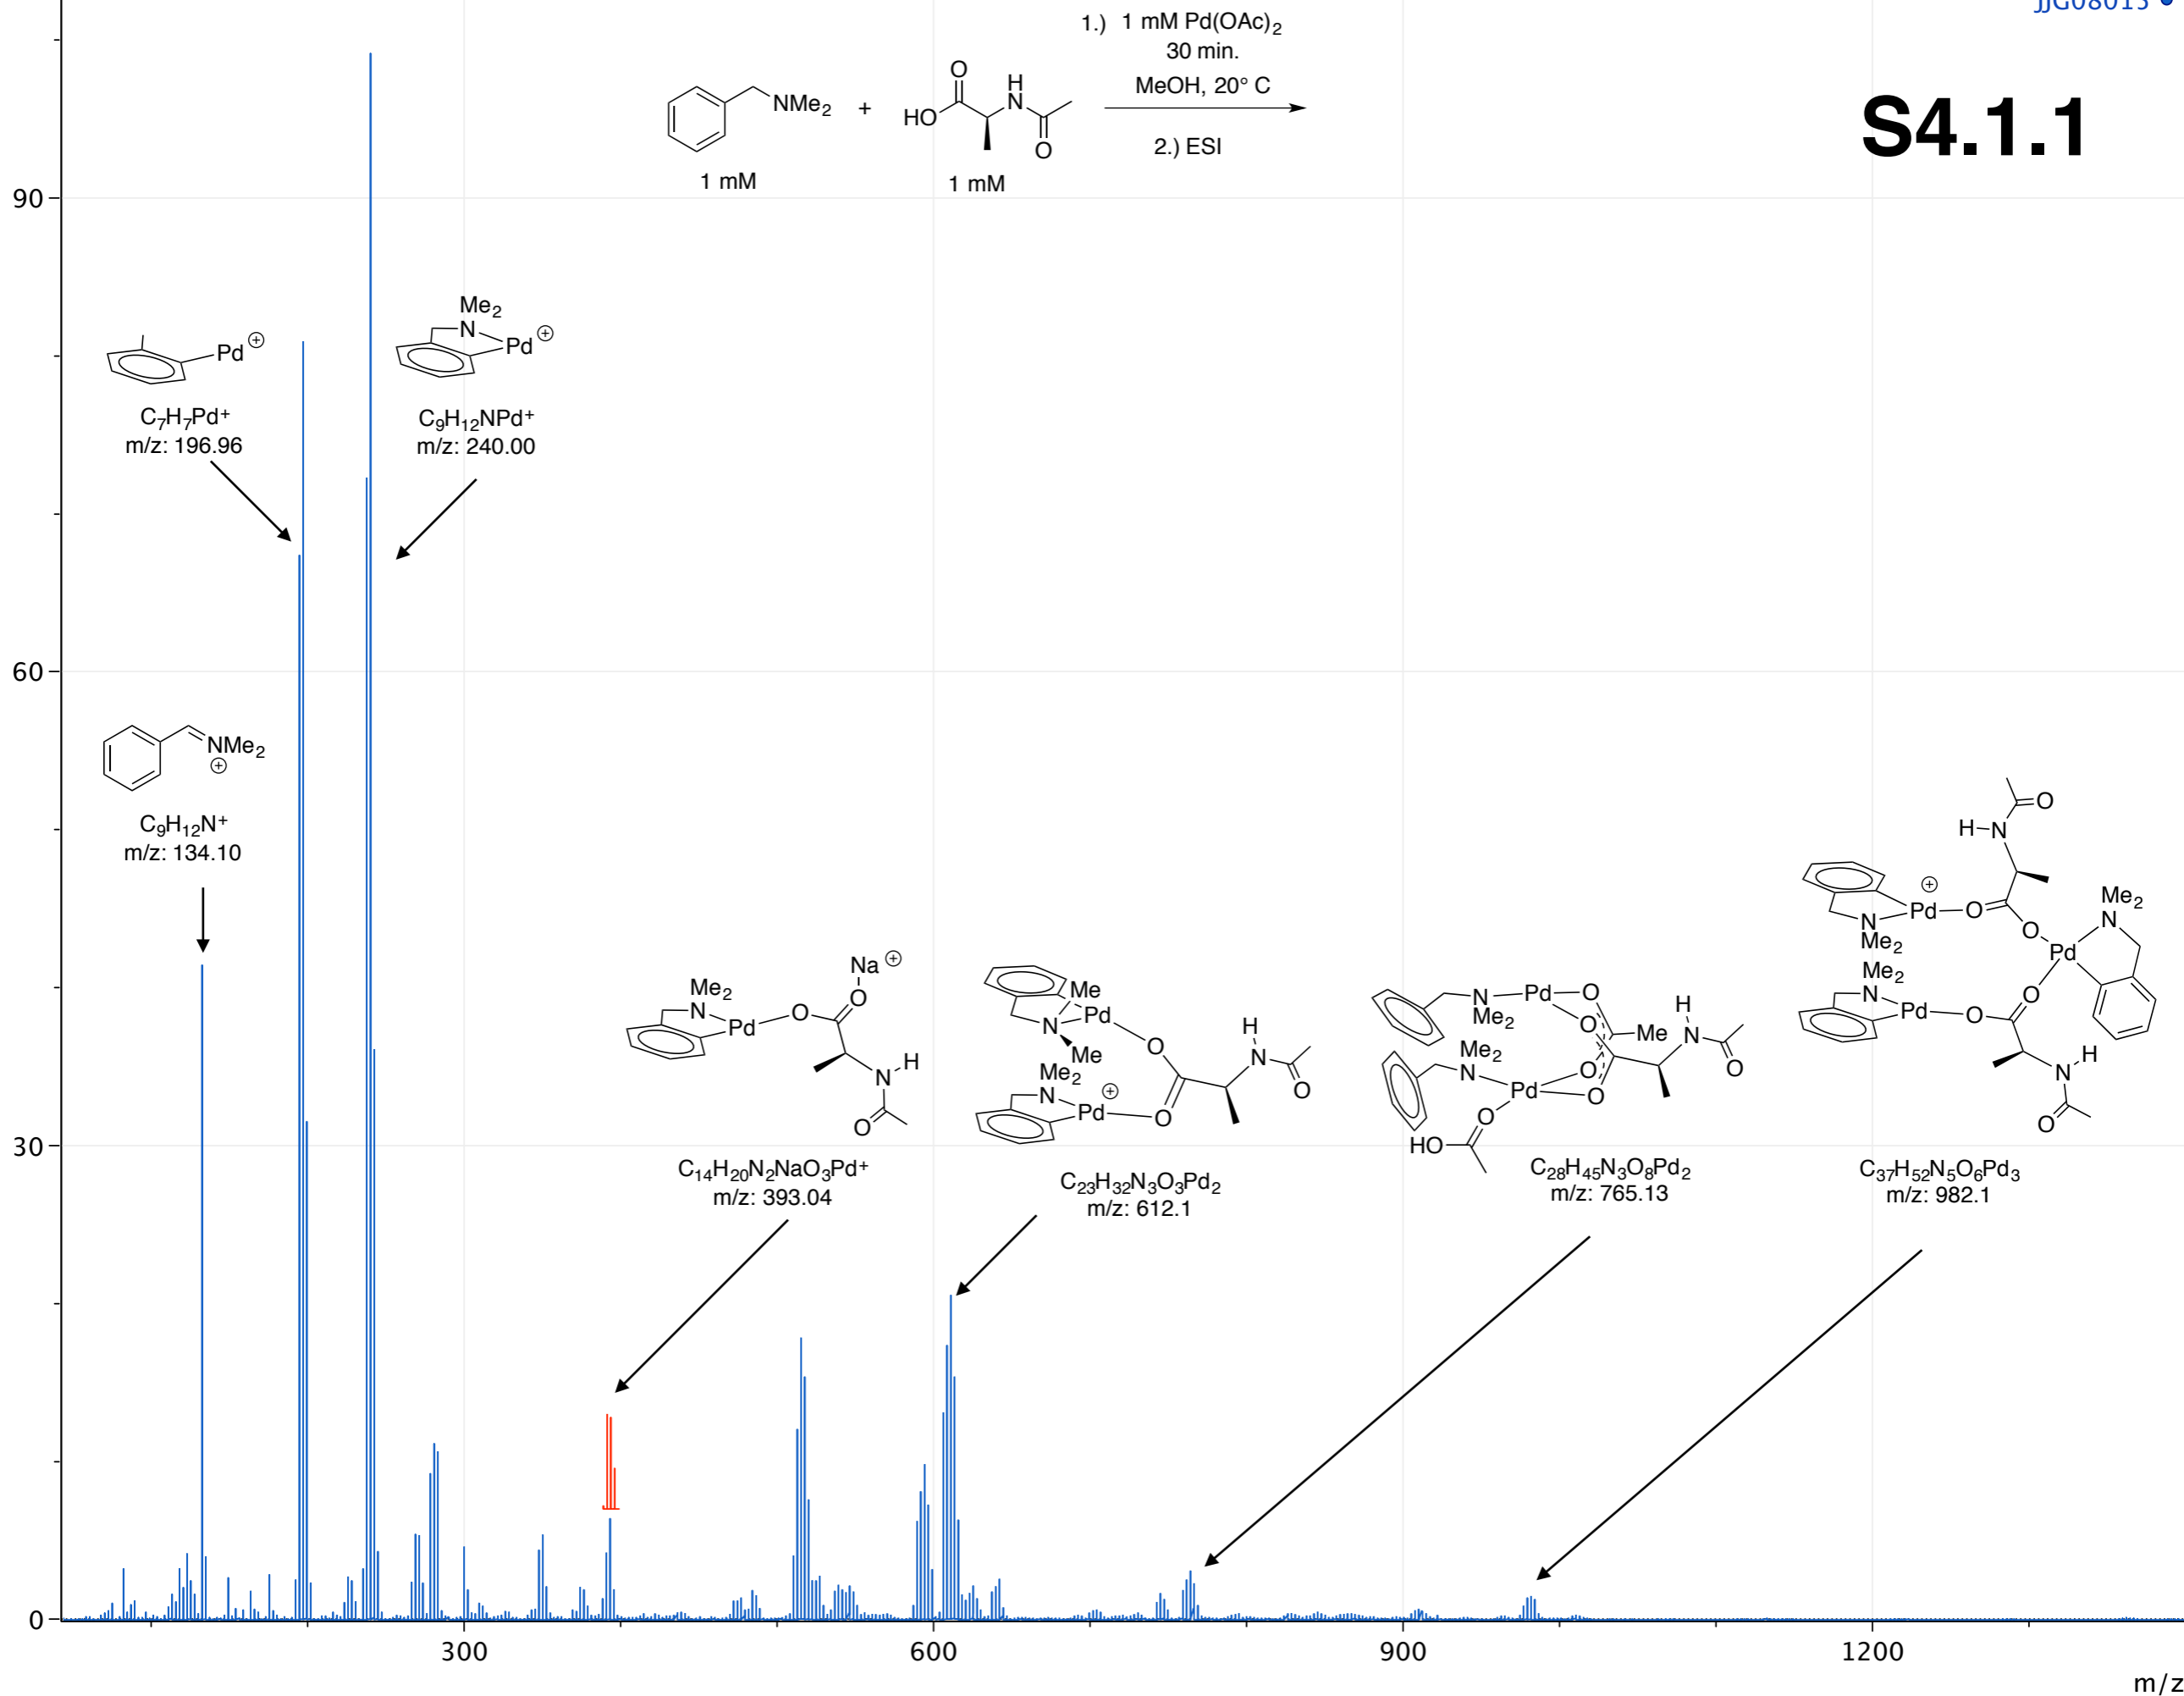

# S4.1.2

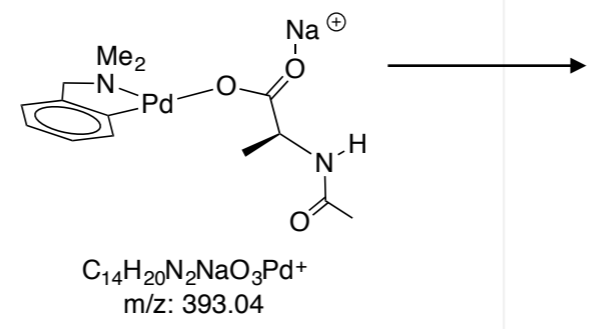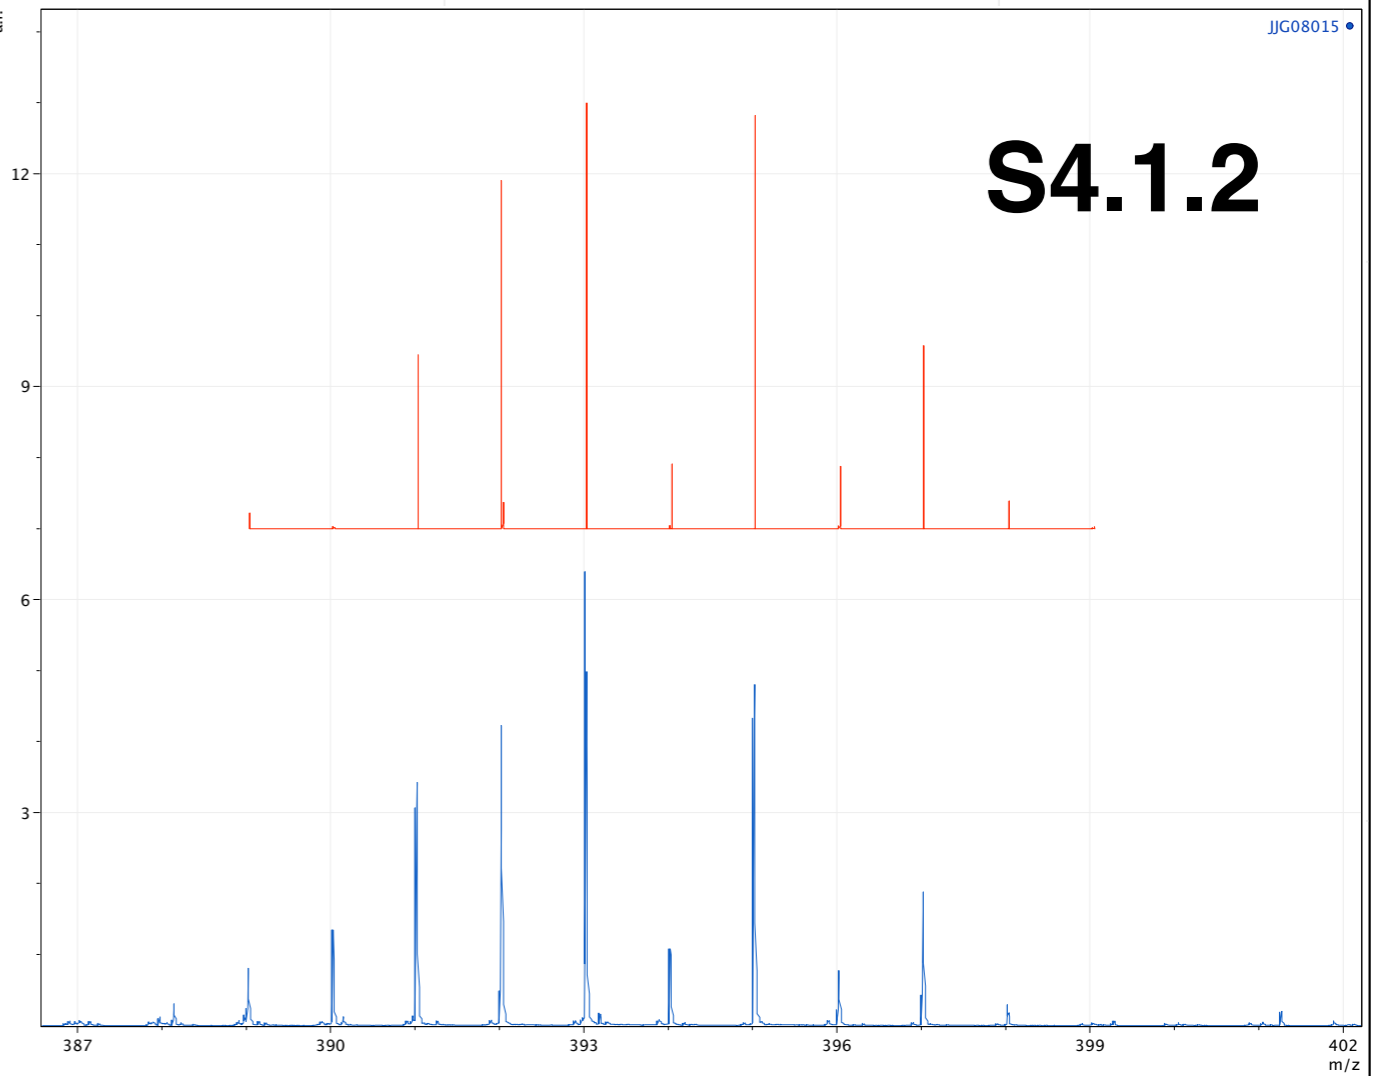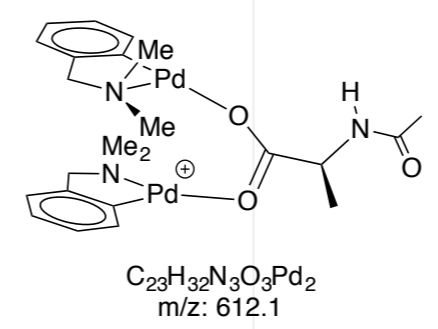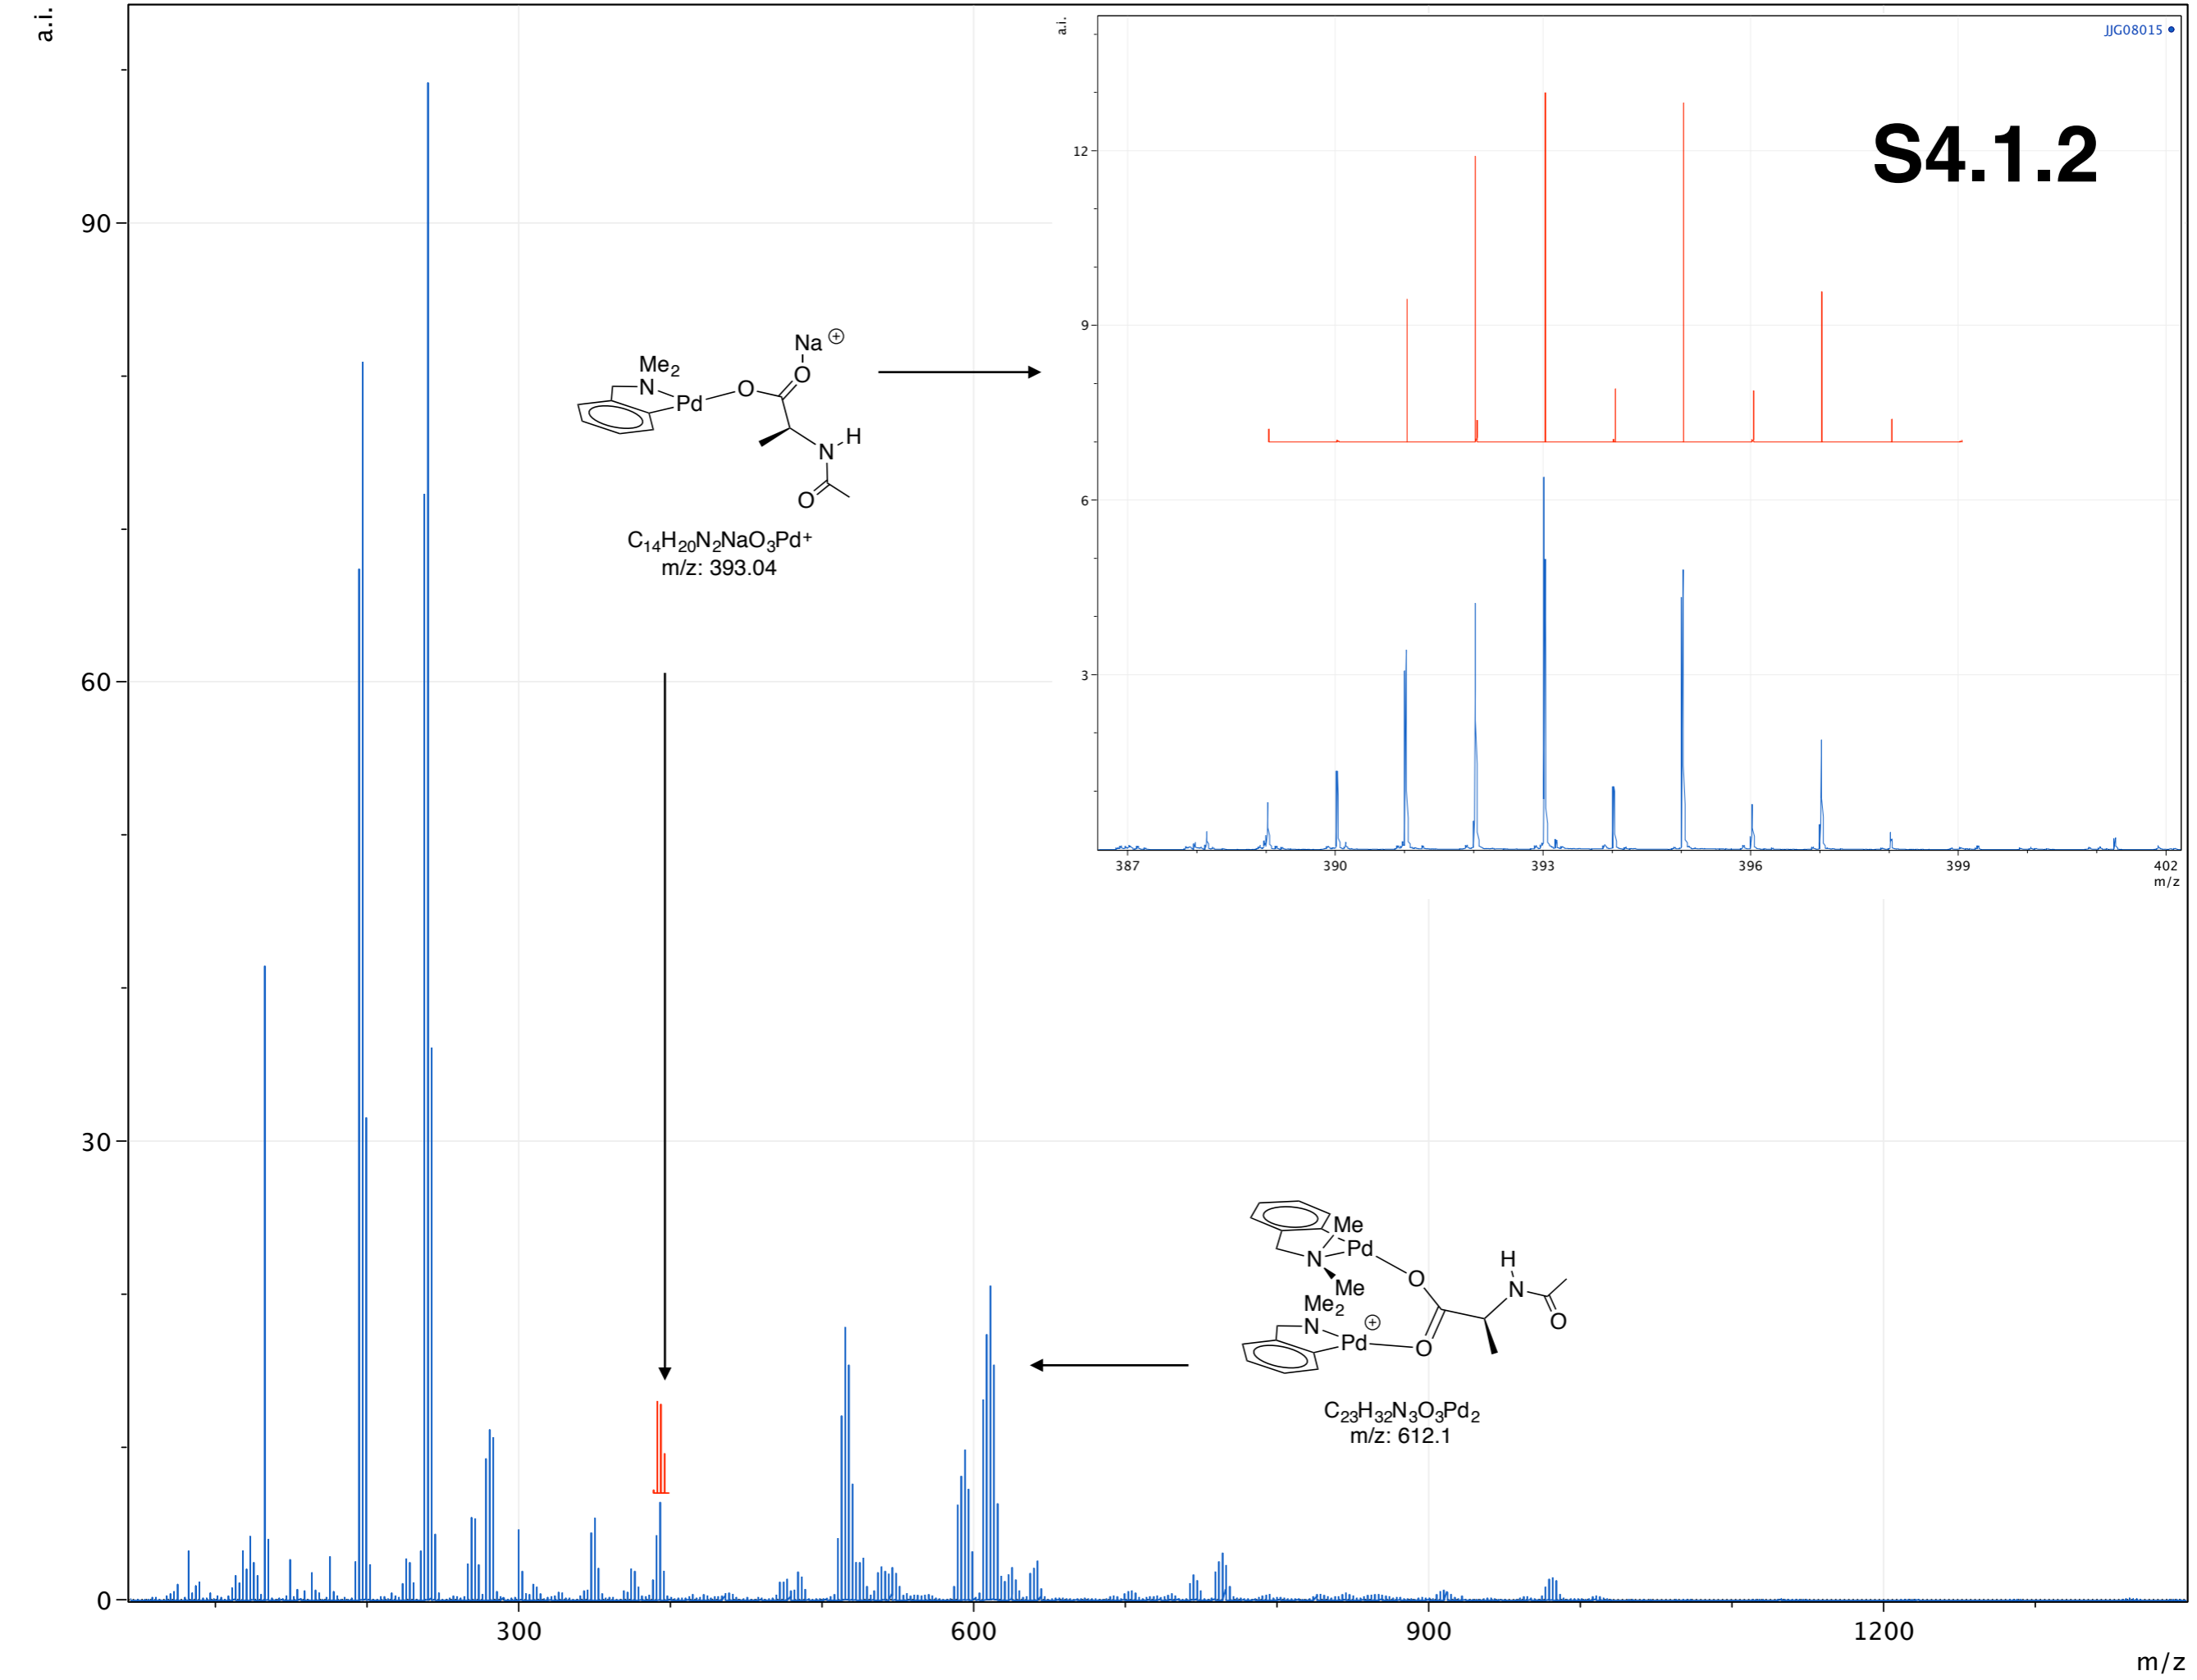

a.i.

JJC08015 •

# S4.1.3

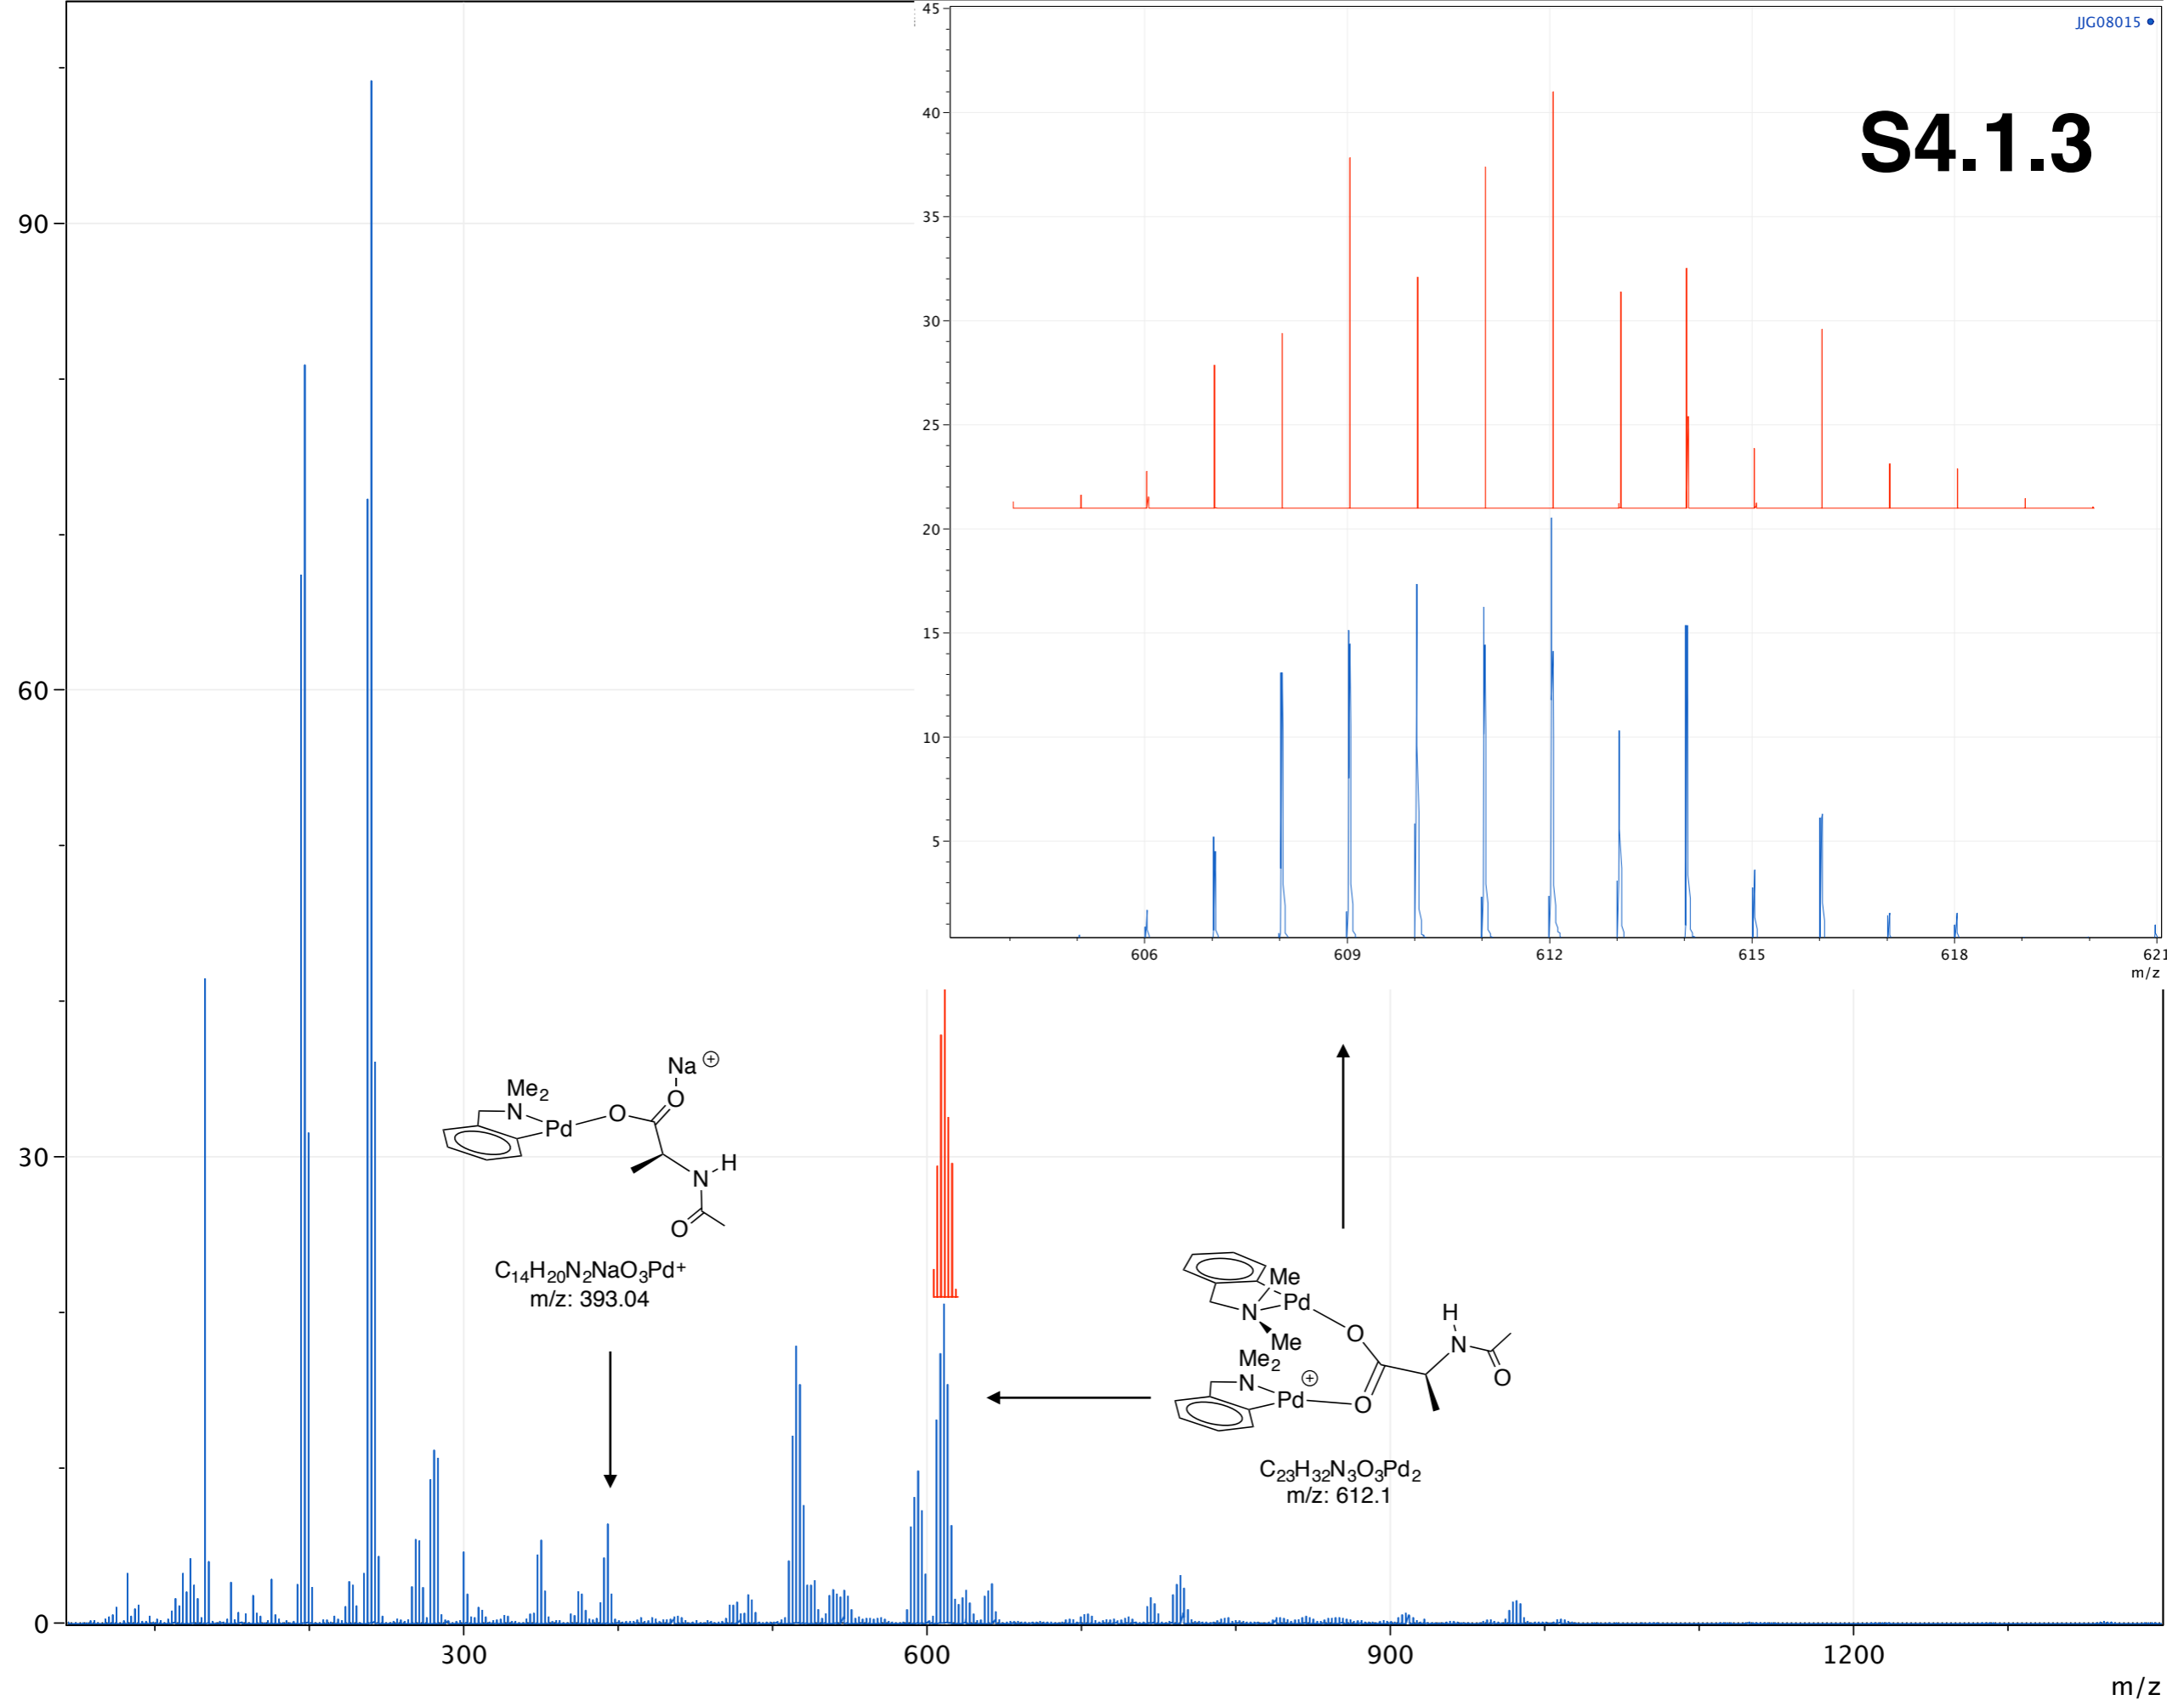

**S4.1.4**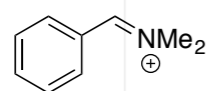

$C_9H_{12}N^+$   
 $m/z: 134.10$

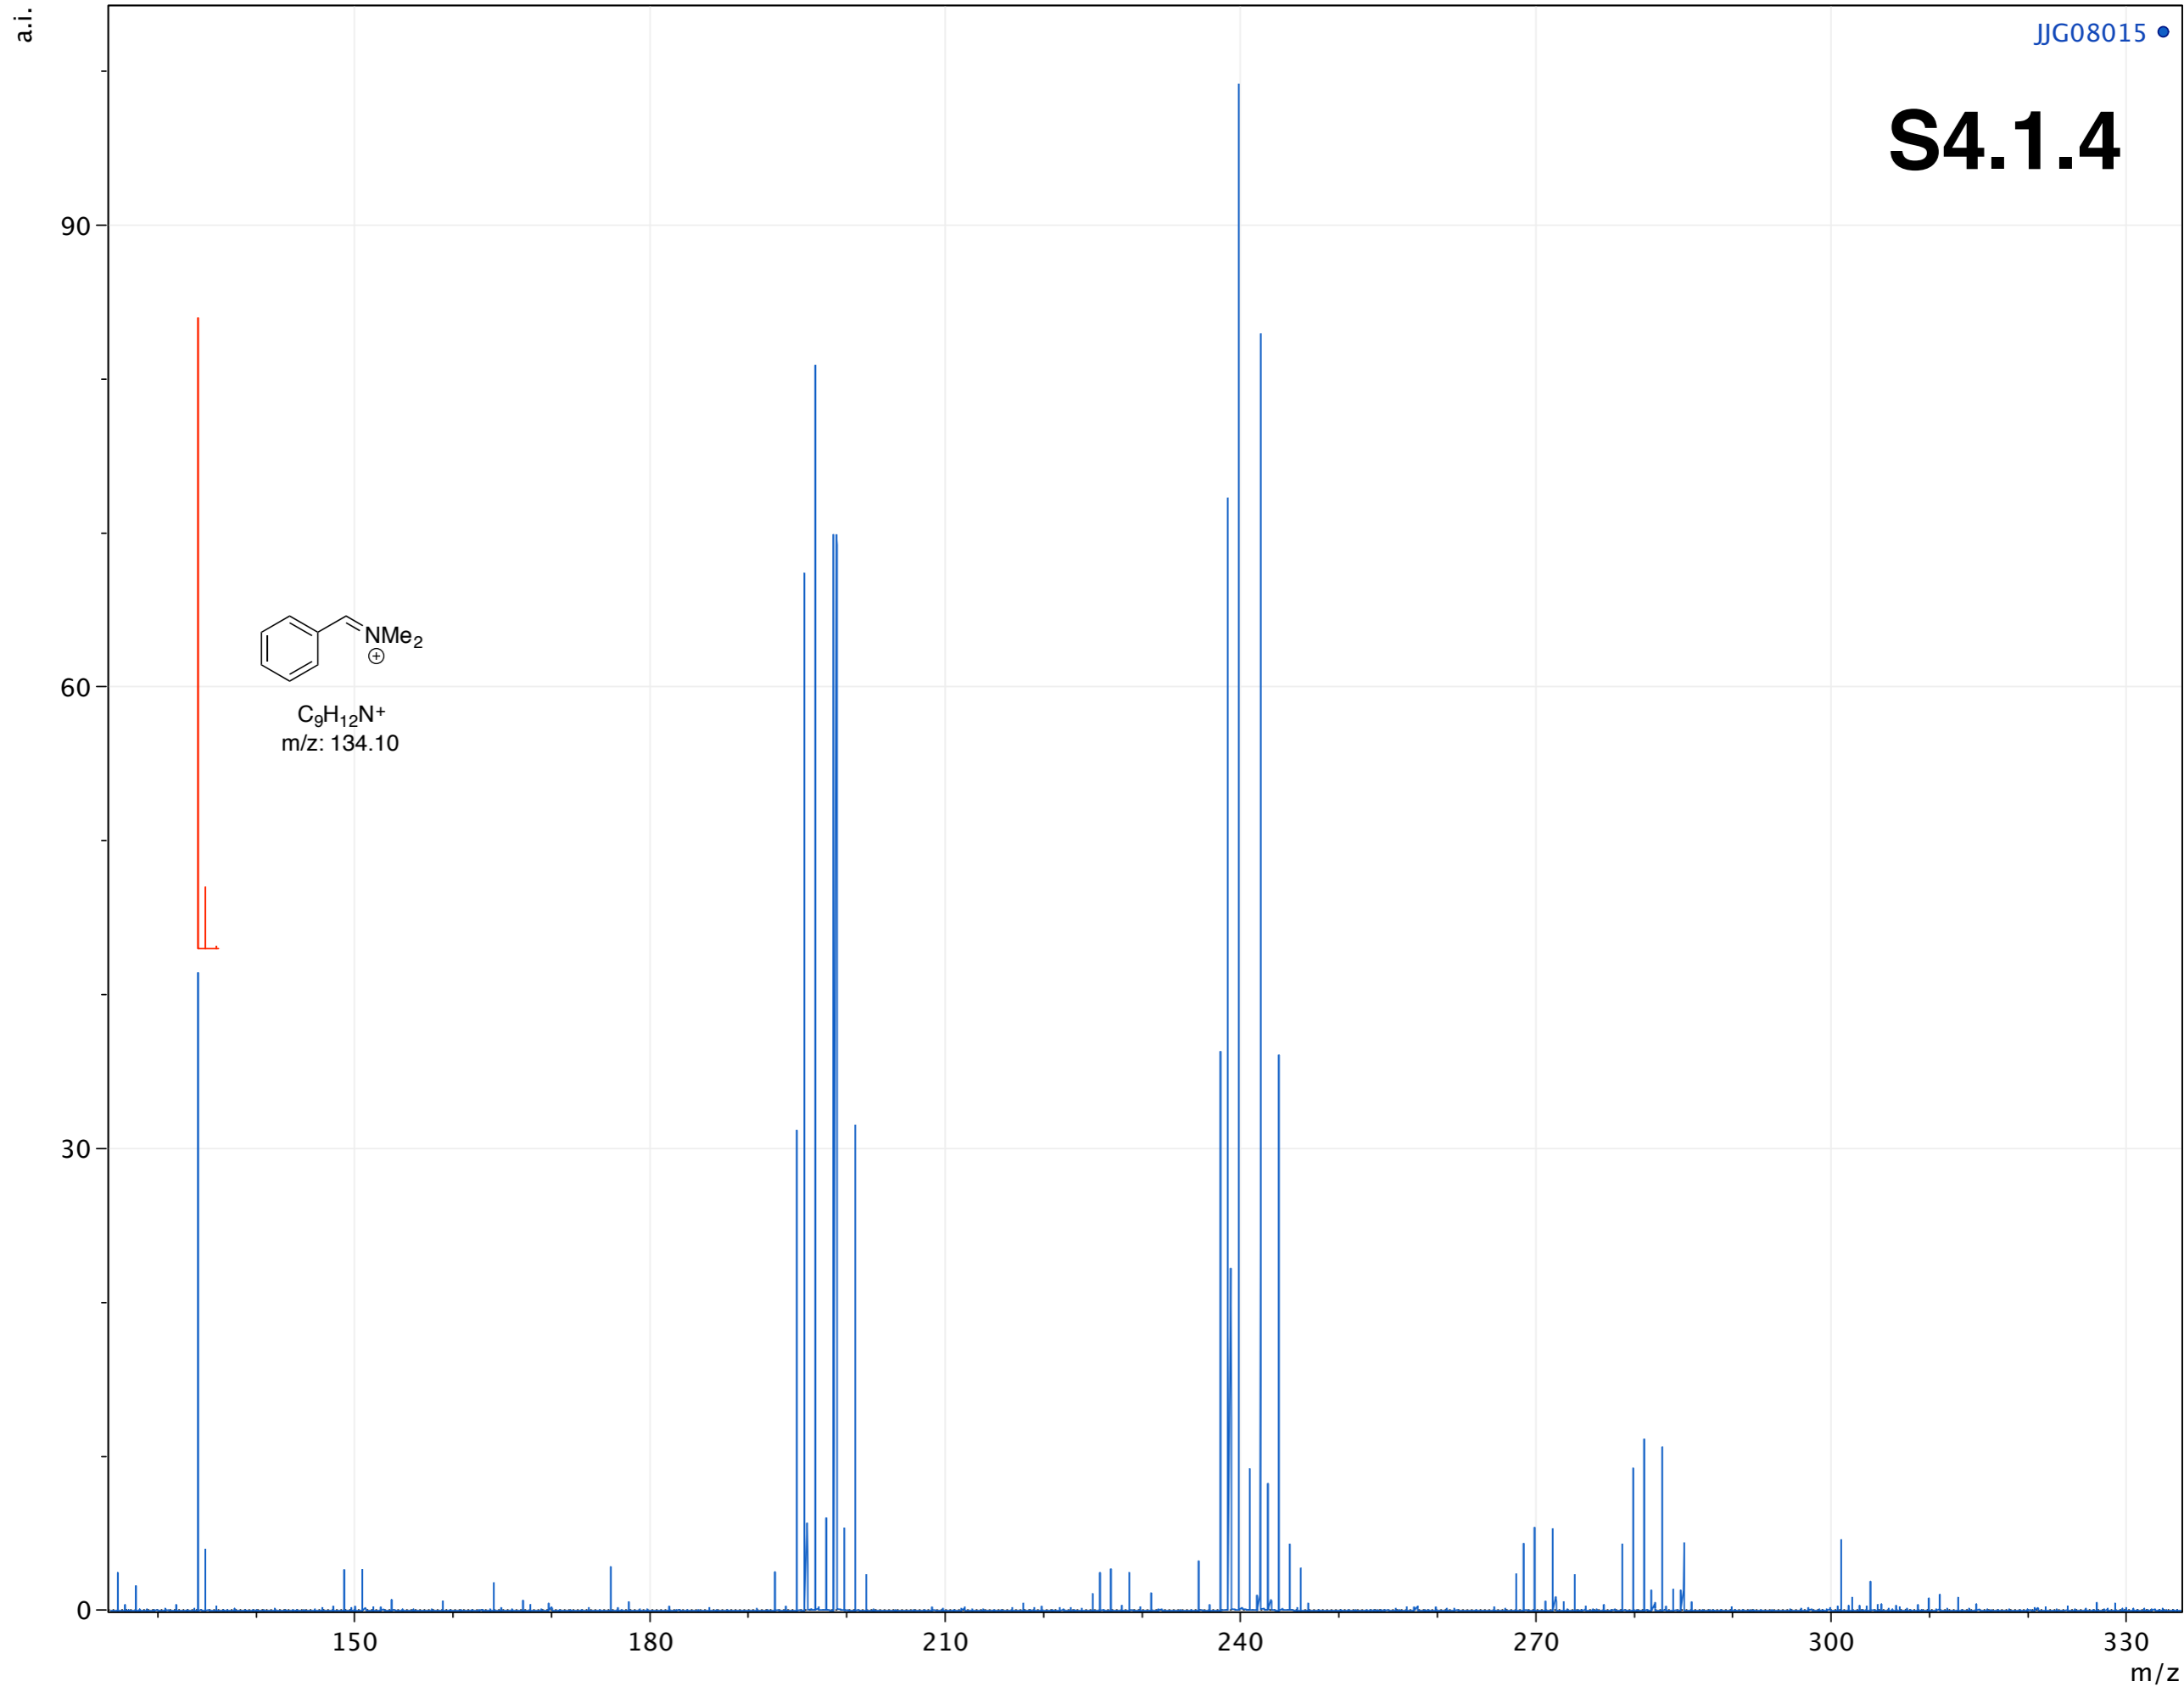

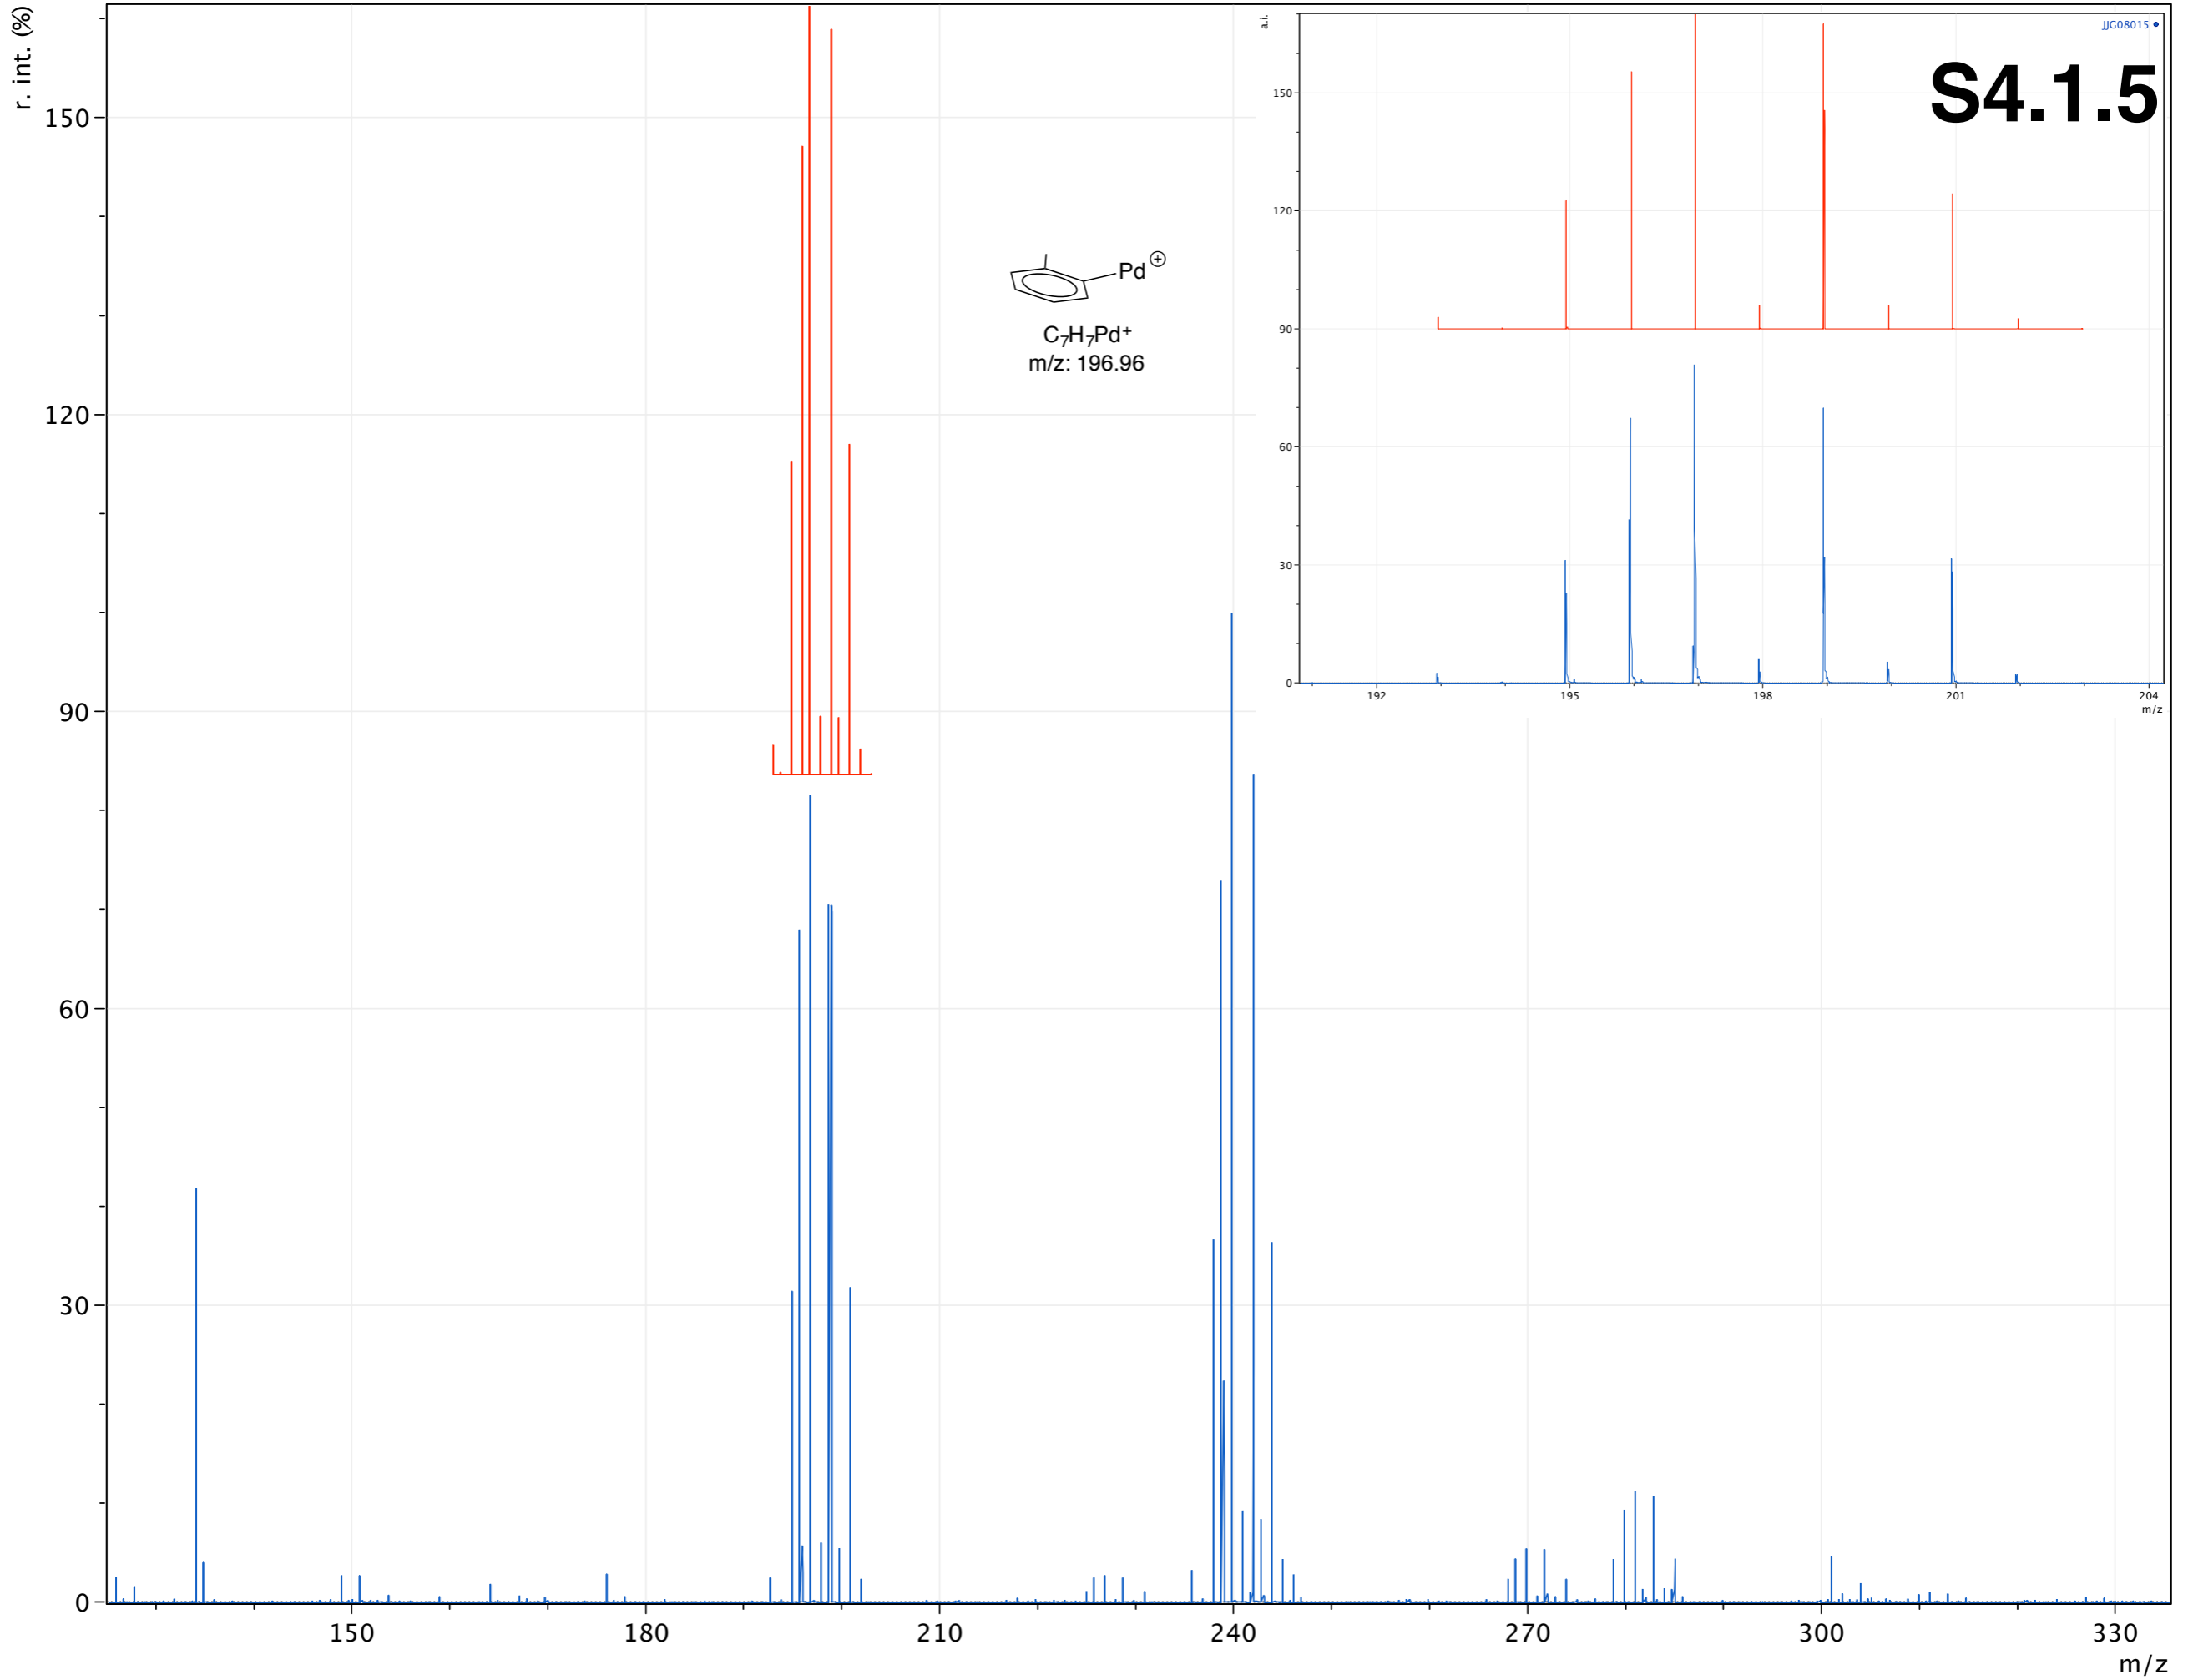

# S4.1.6

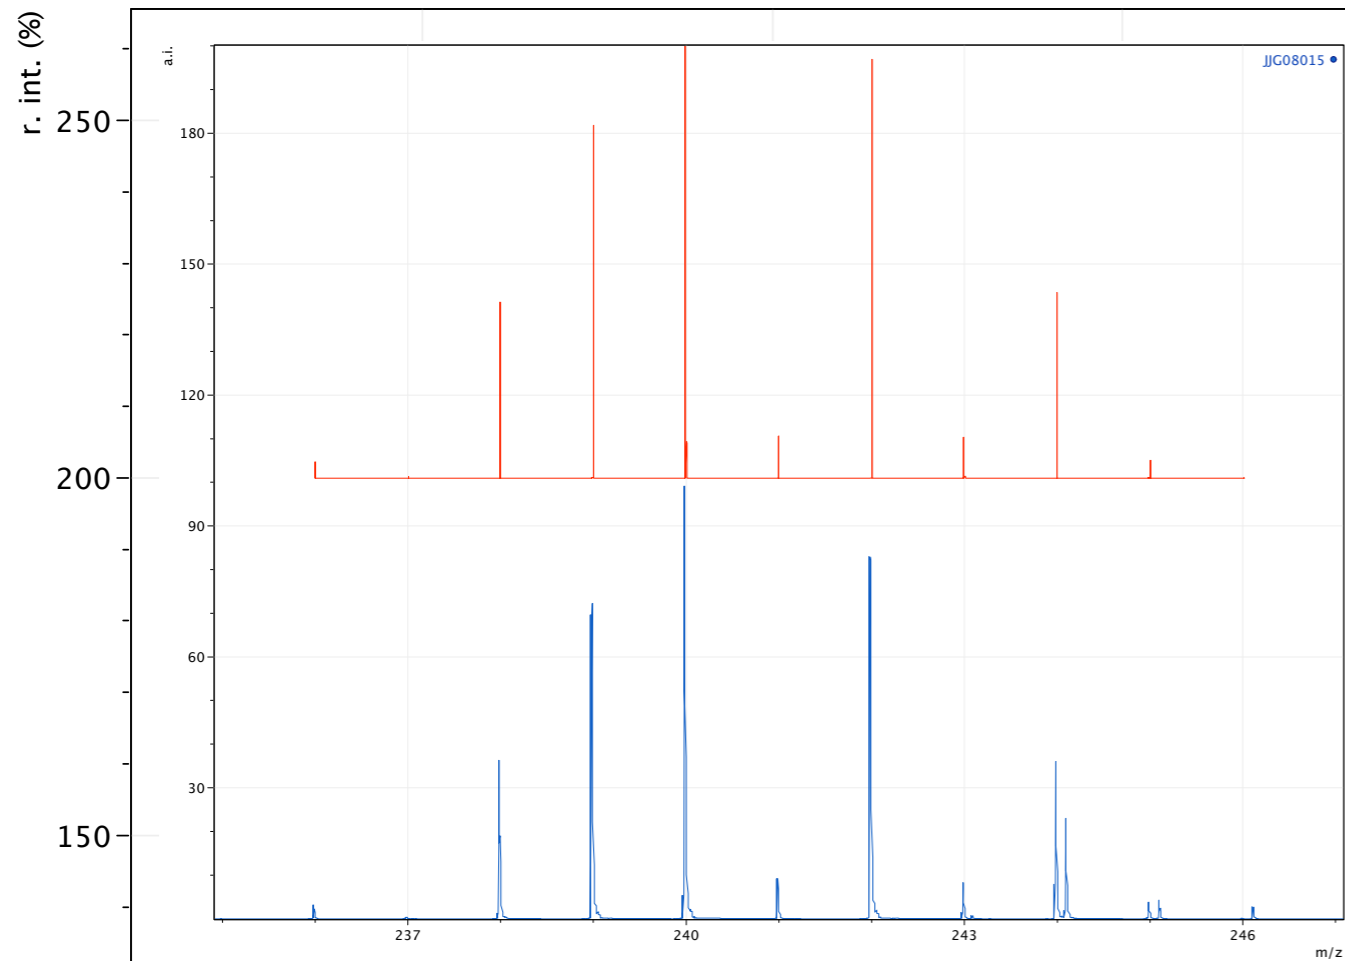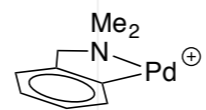

C<sub>9</sub>H<sub>12</sub>NPd<sup>+</sup>  
m/z: 240.00

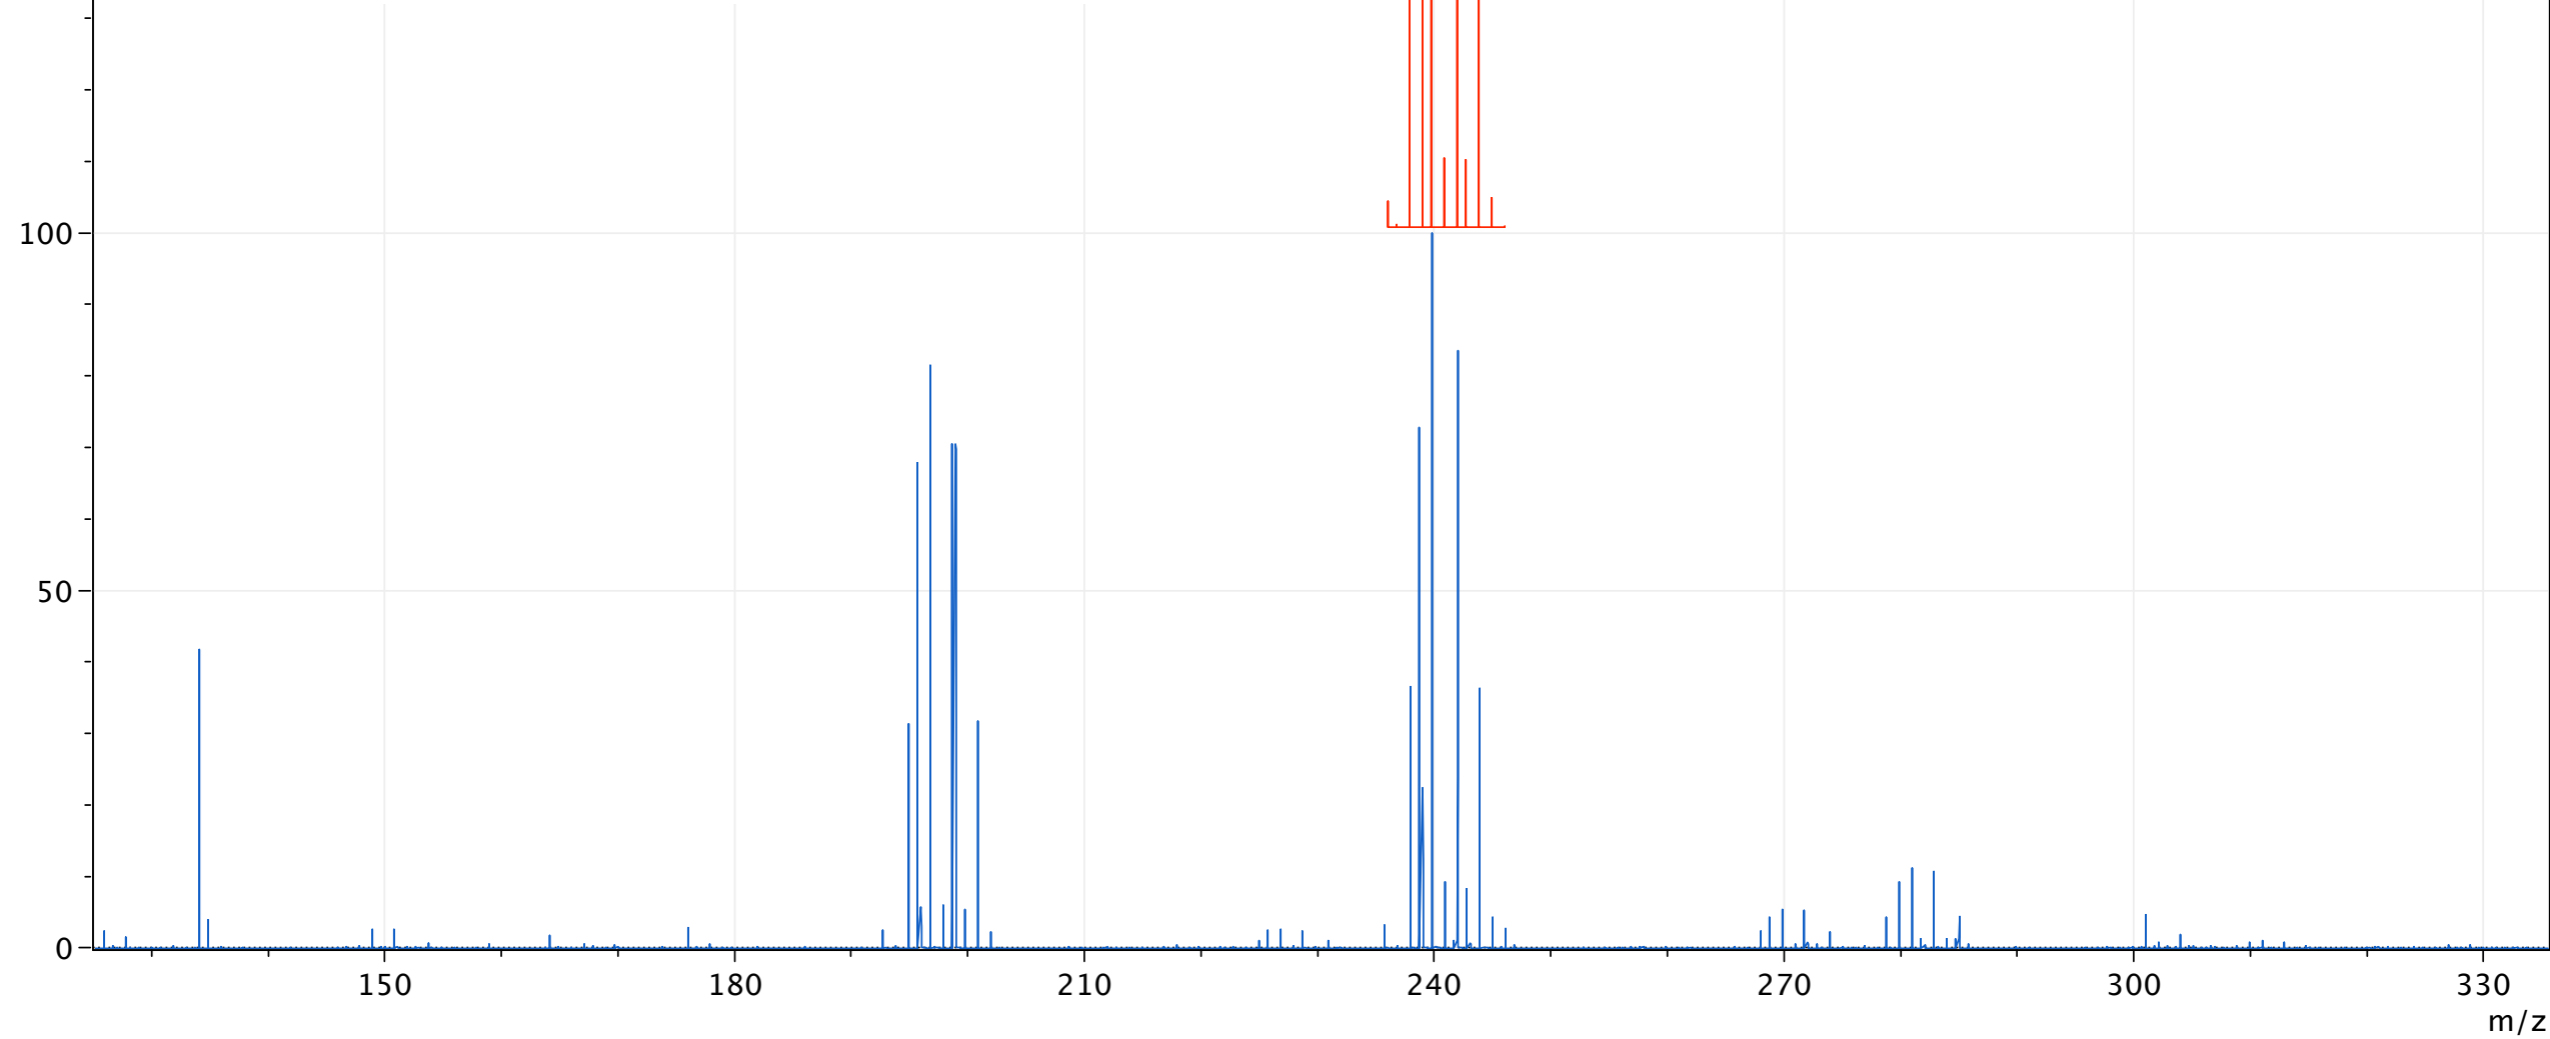

# S4.1.7

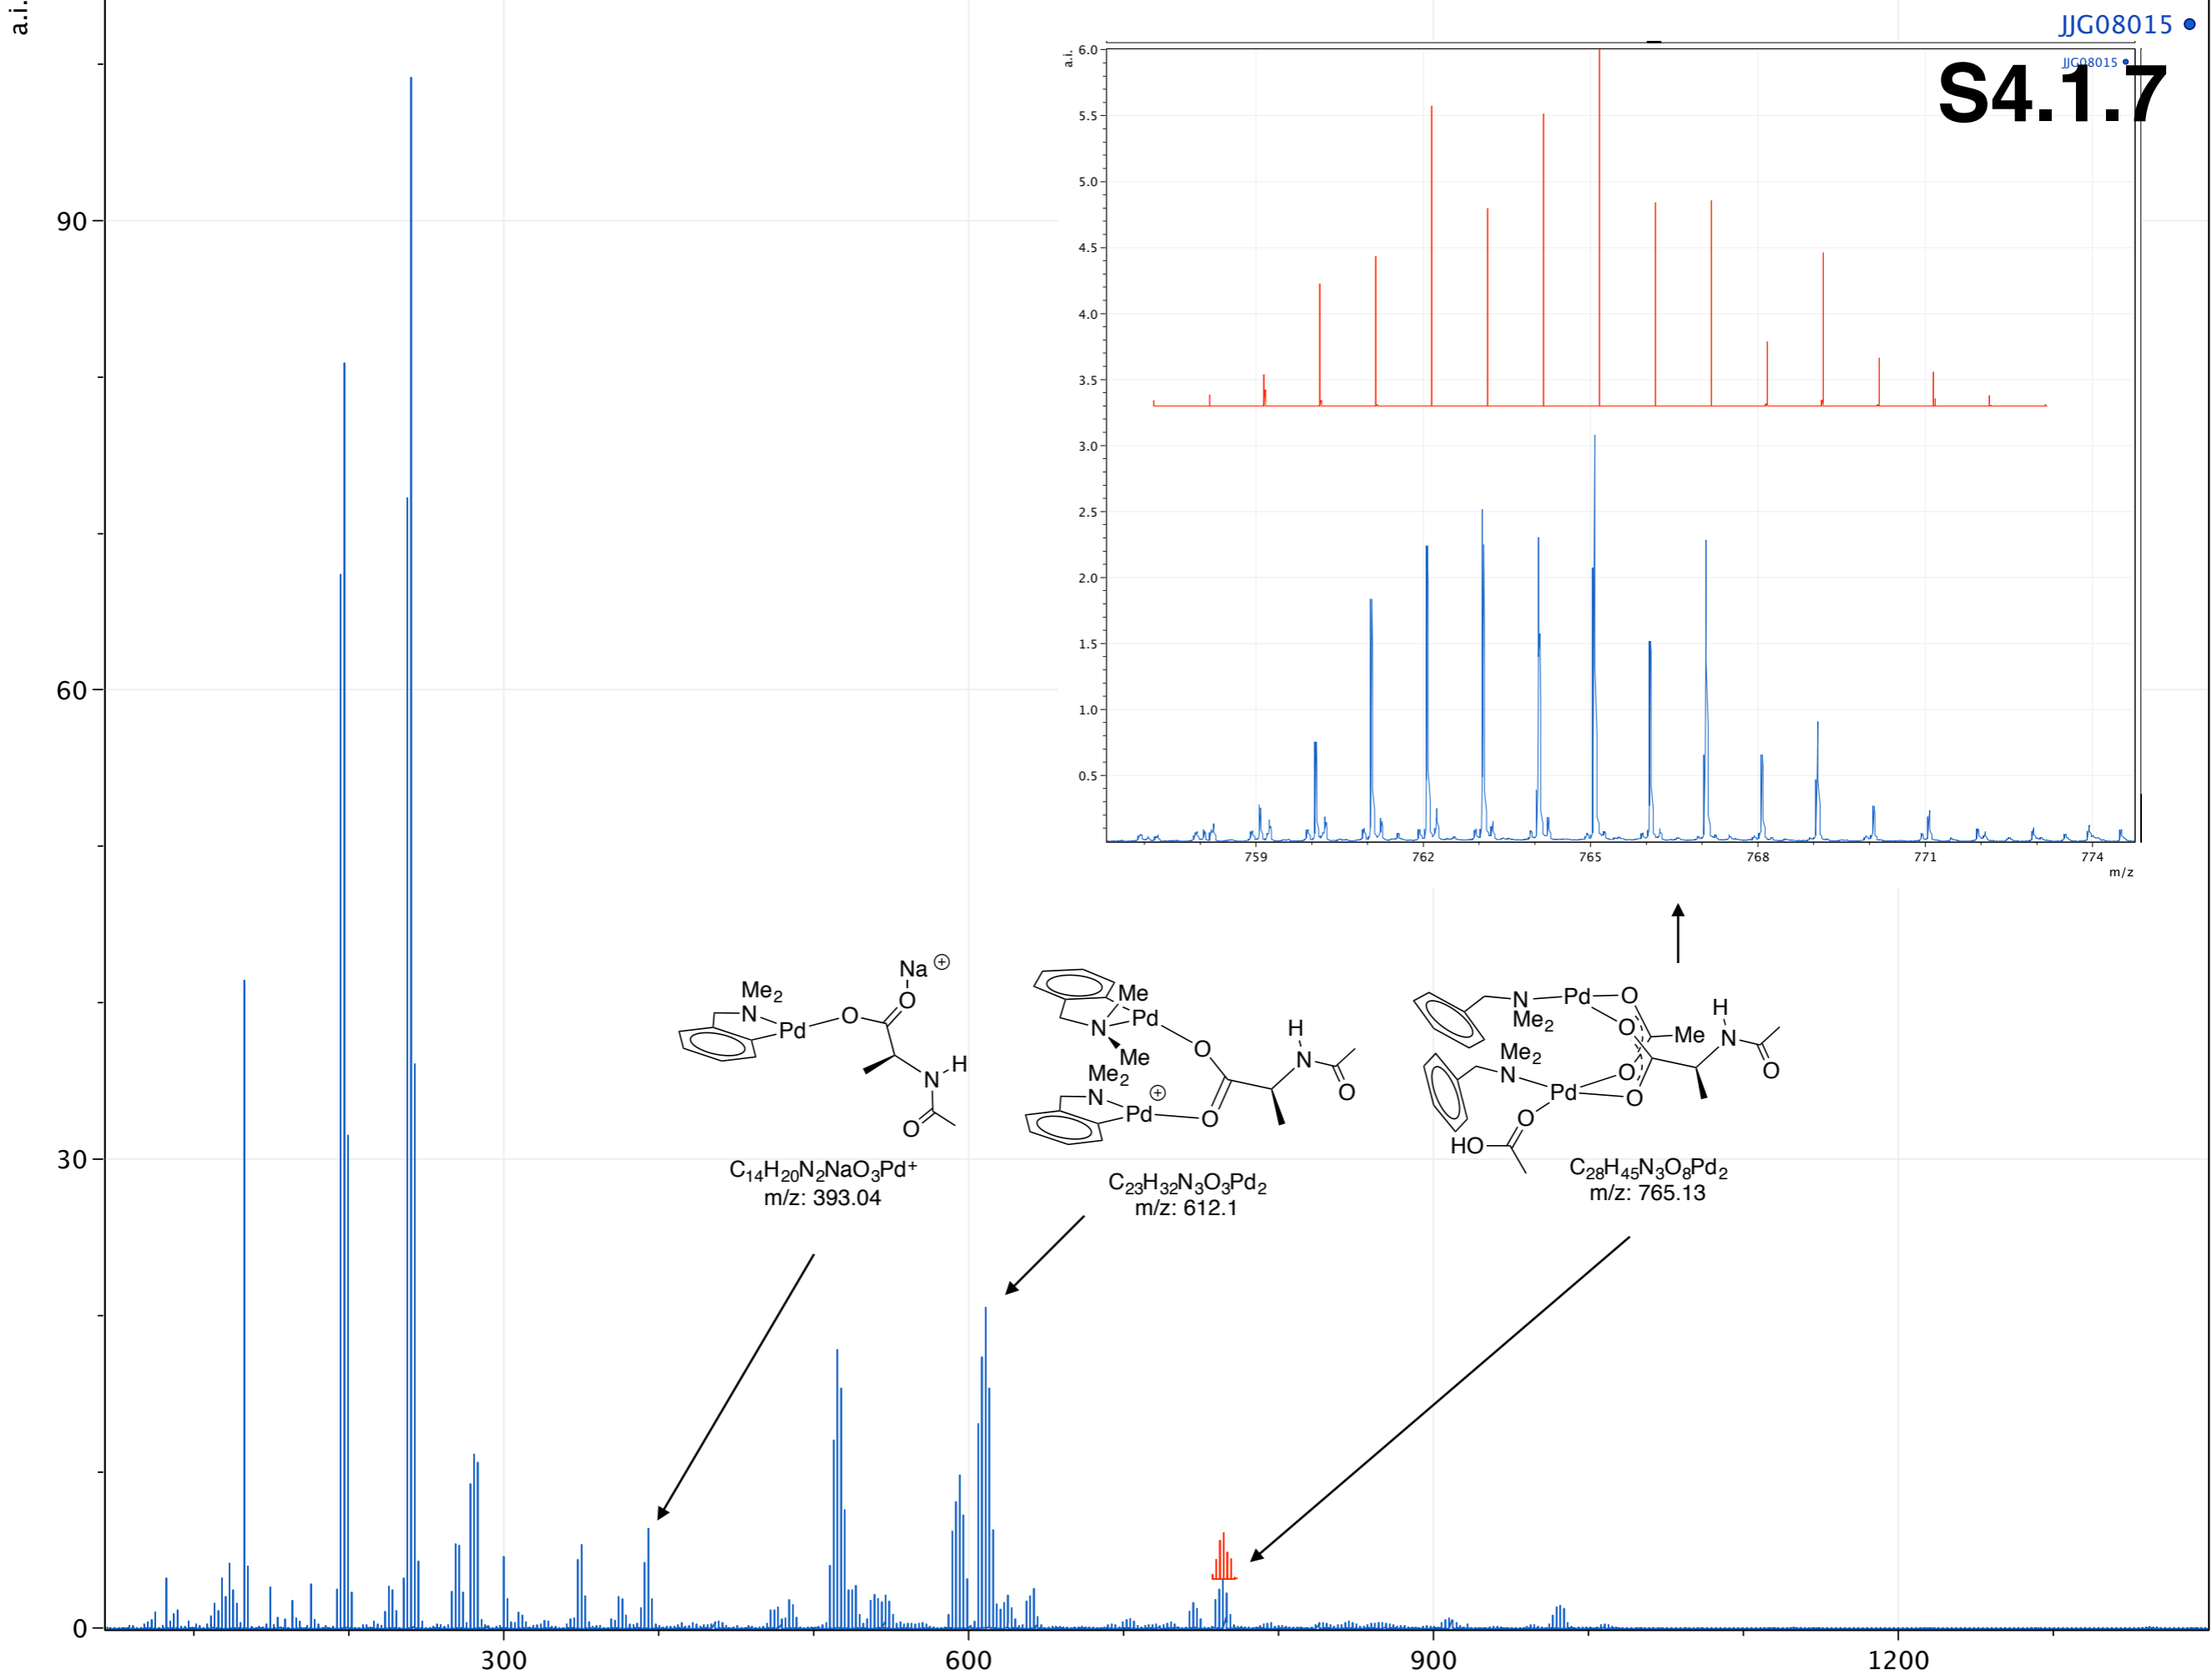



# S4.1.8

JJG08015

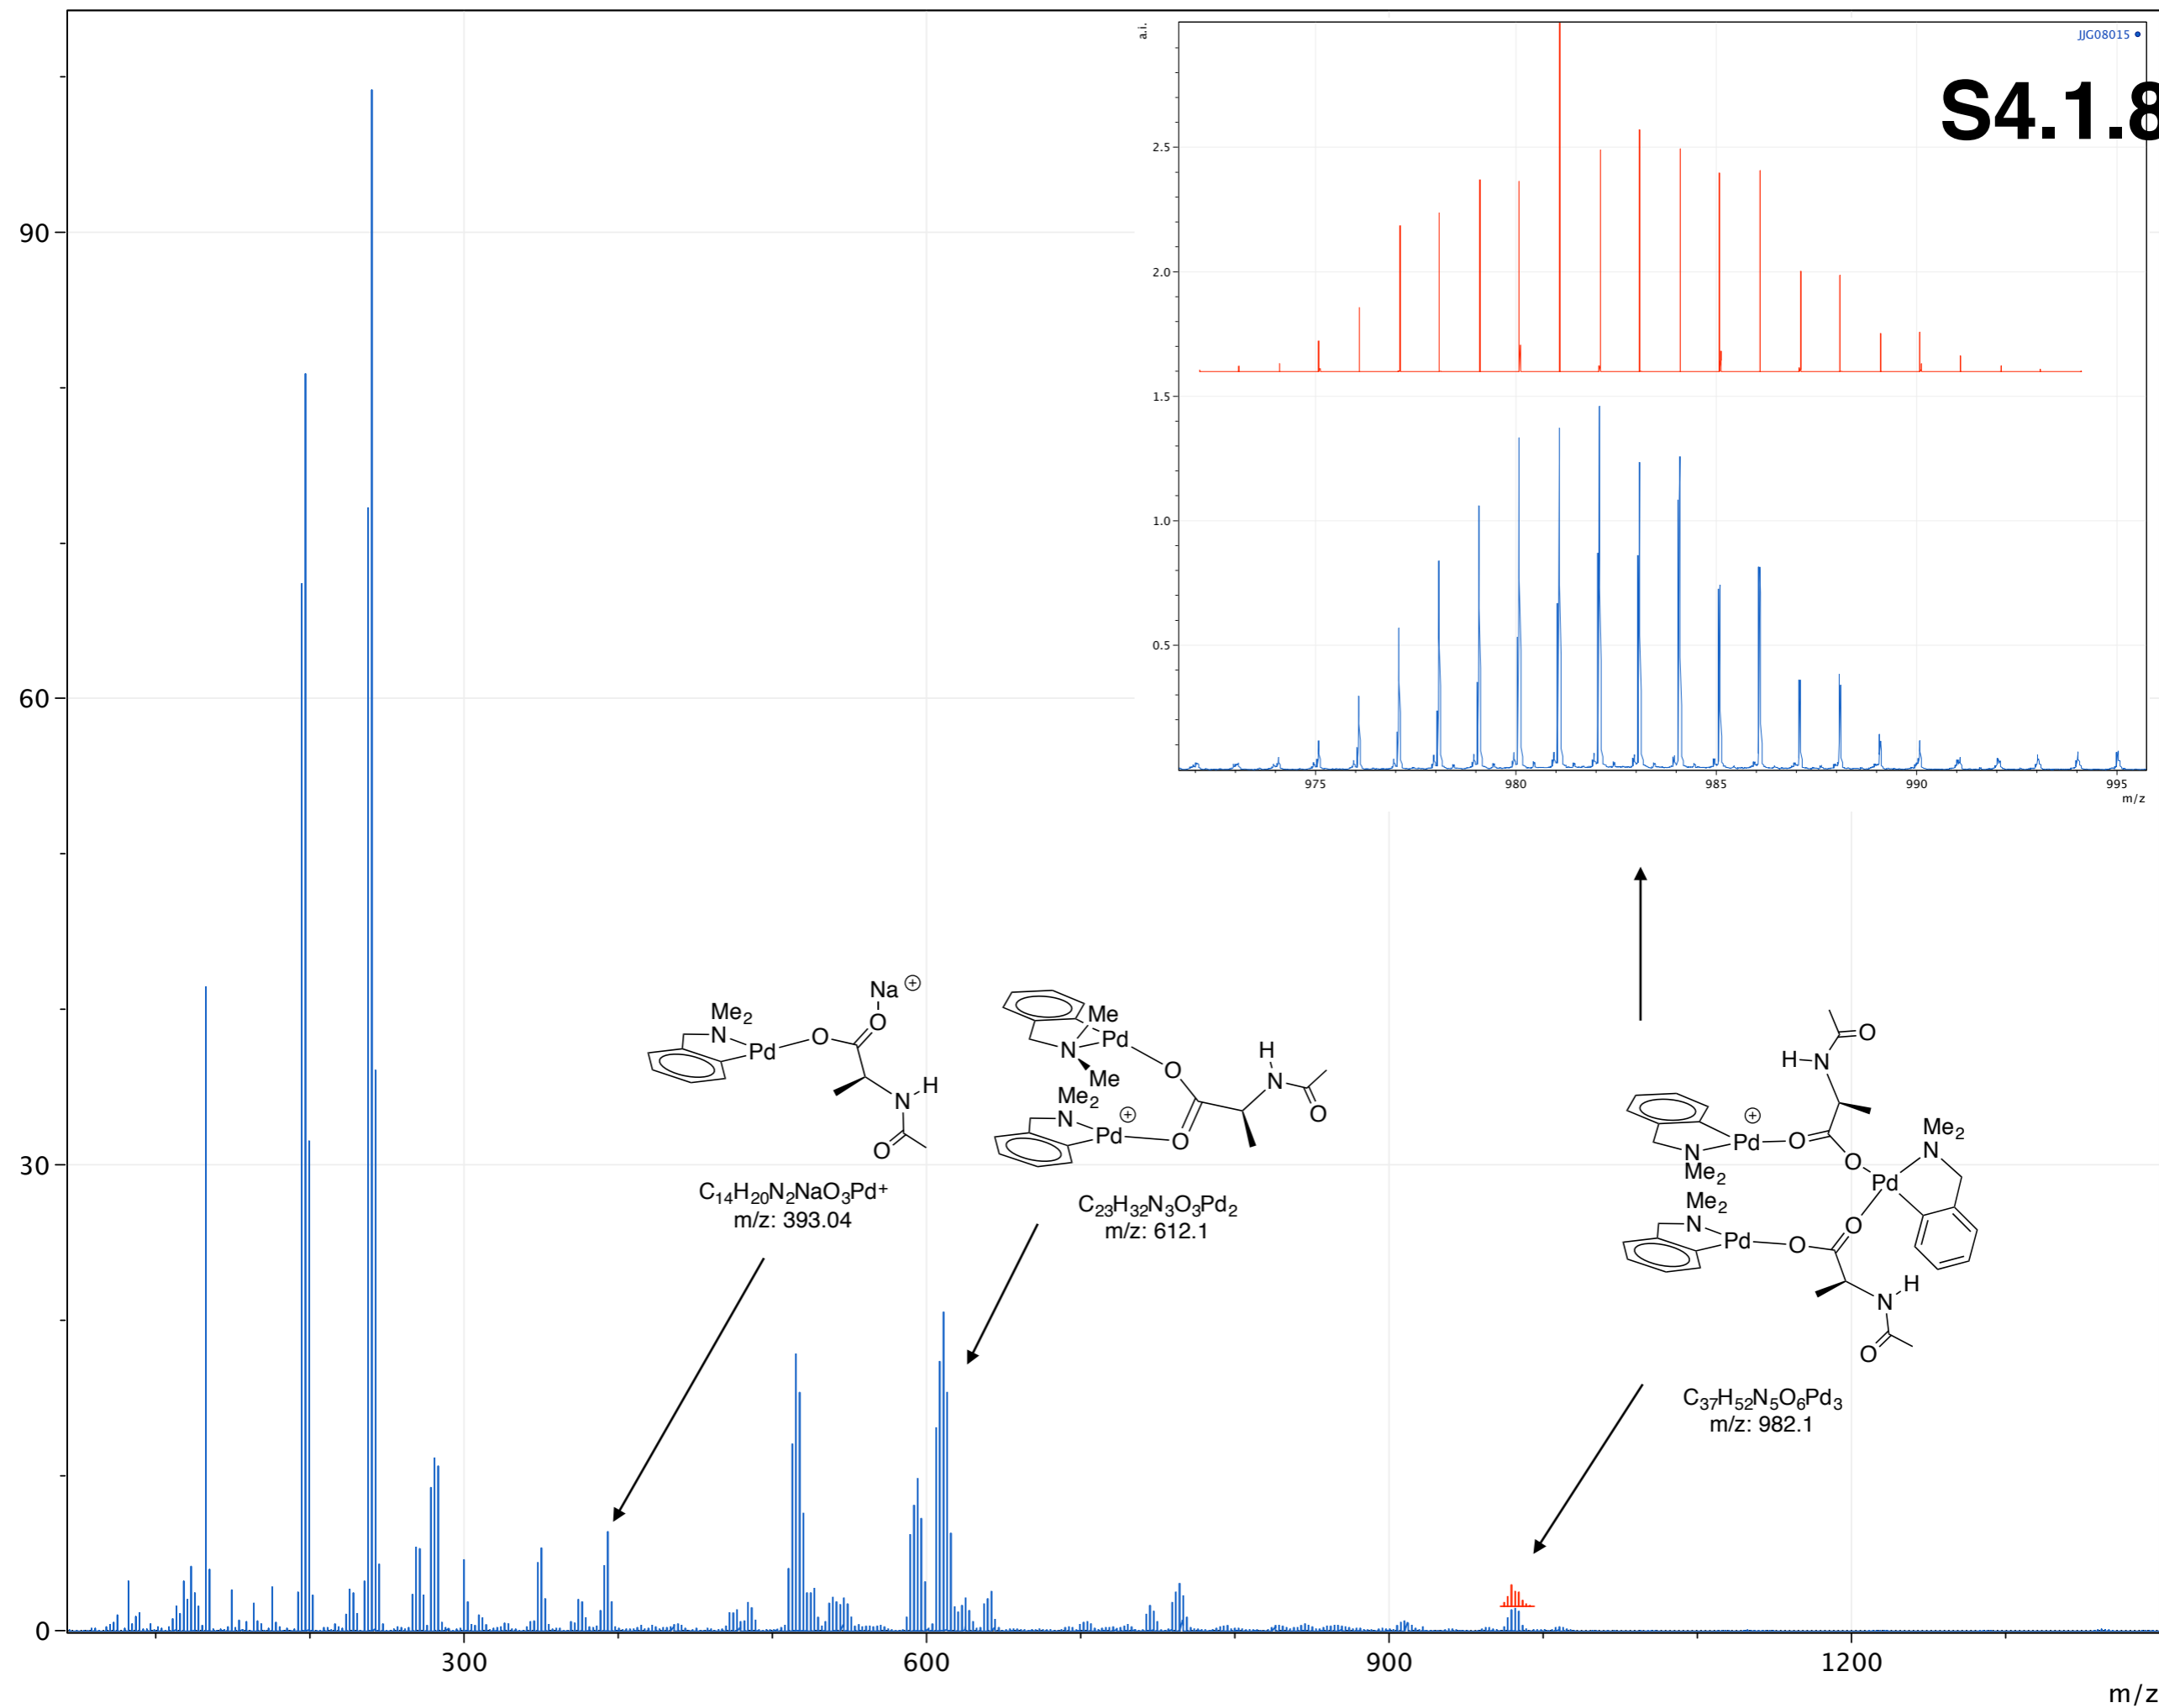

# S4.2.1

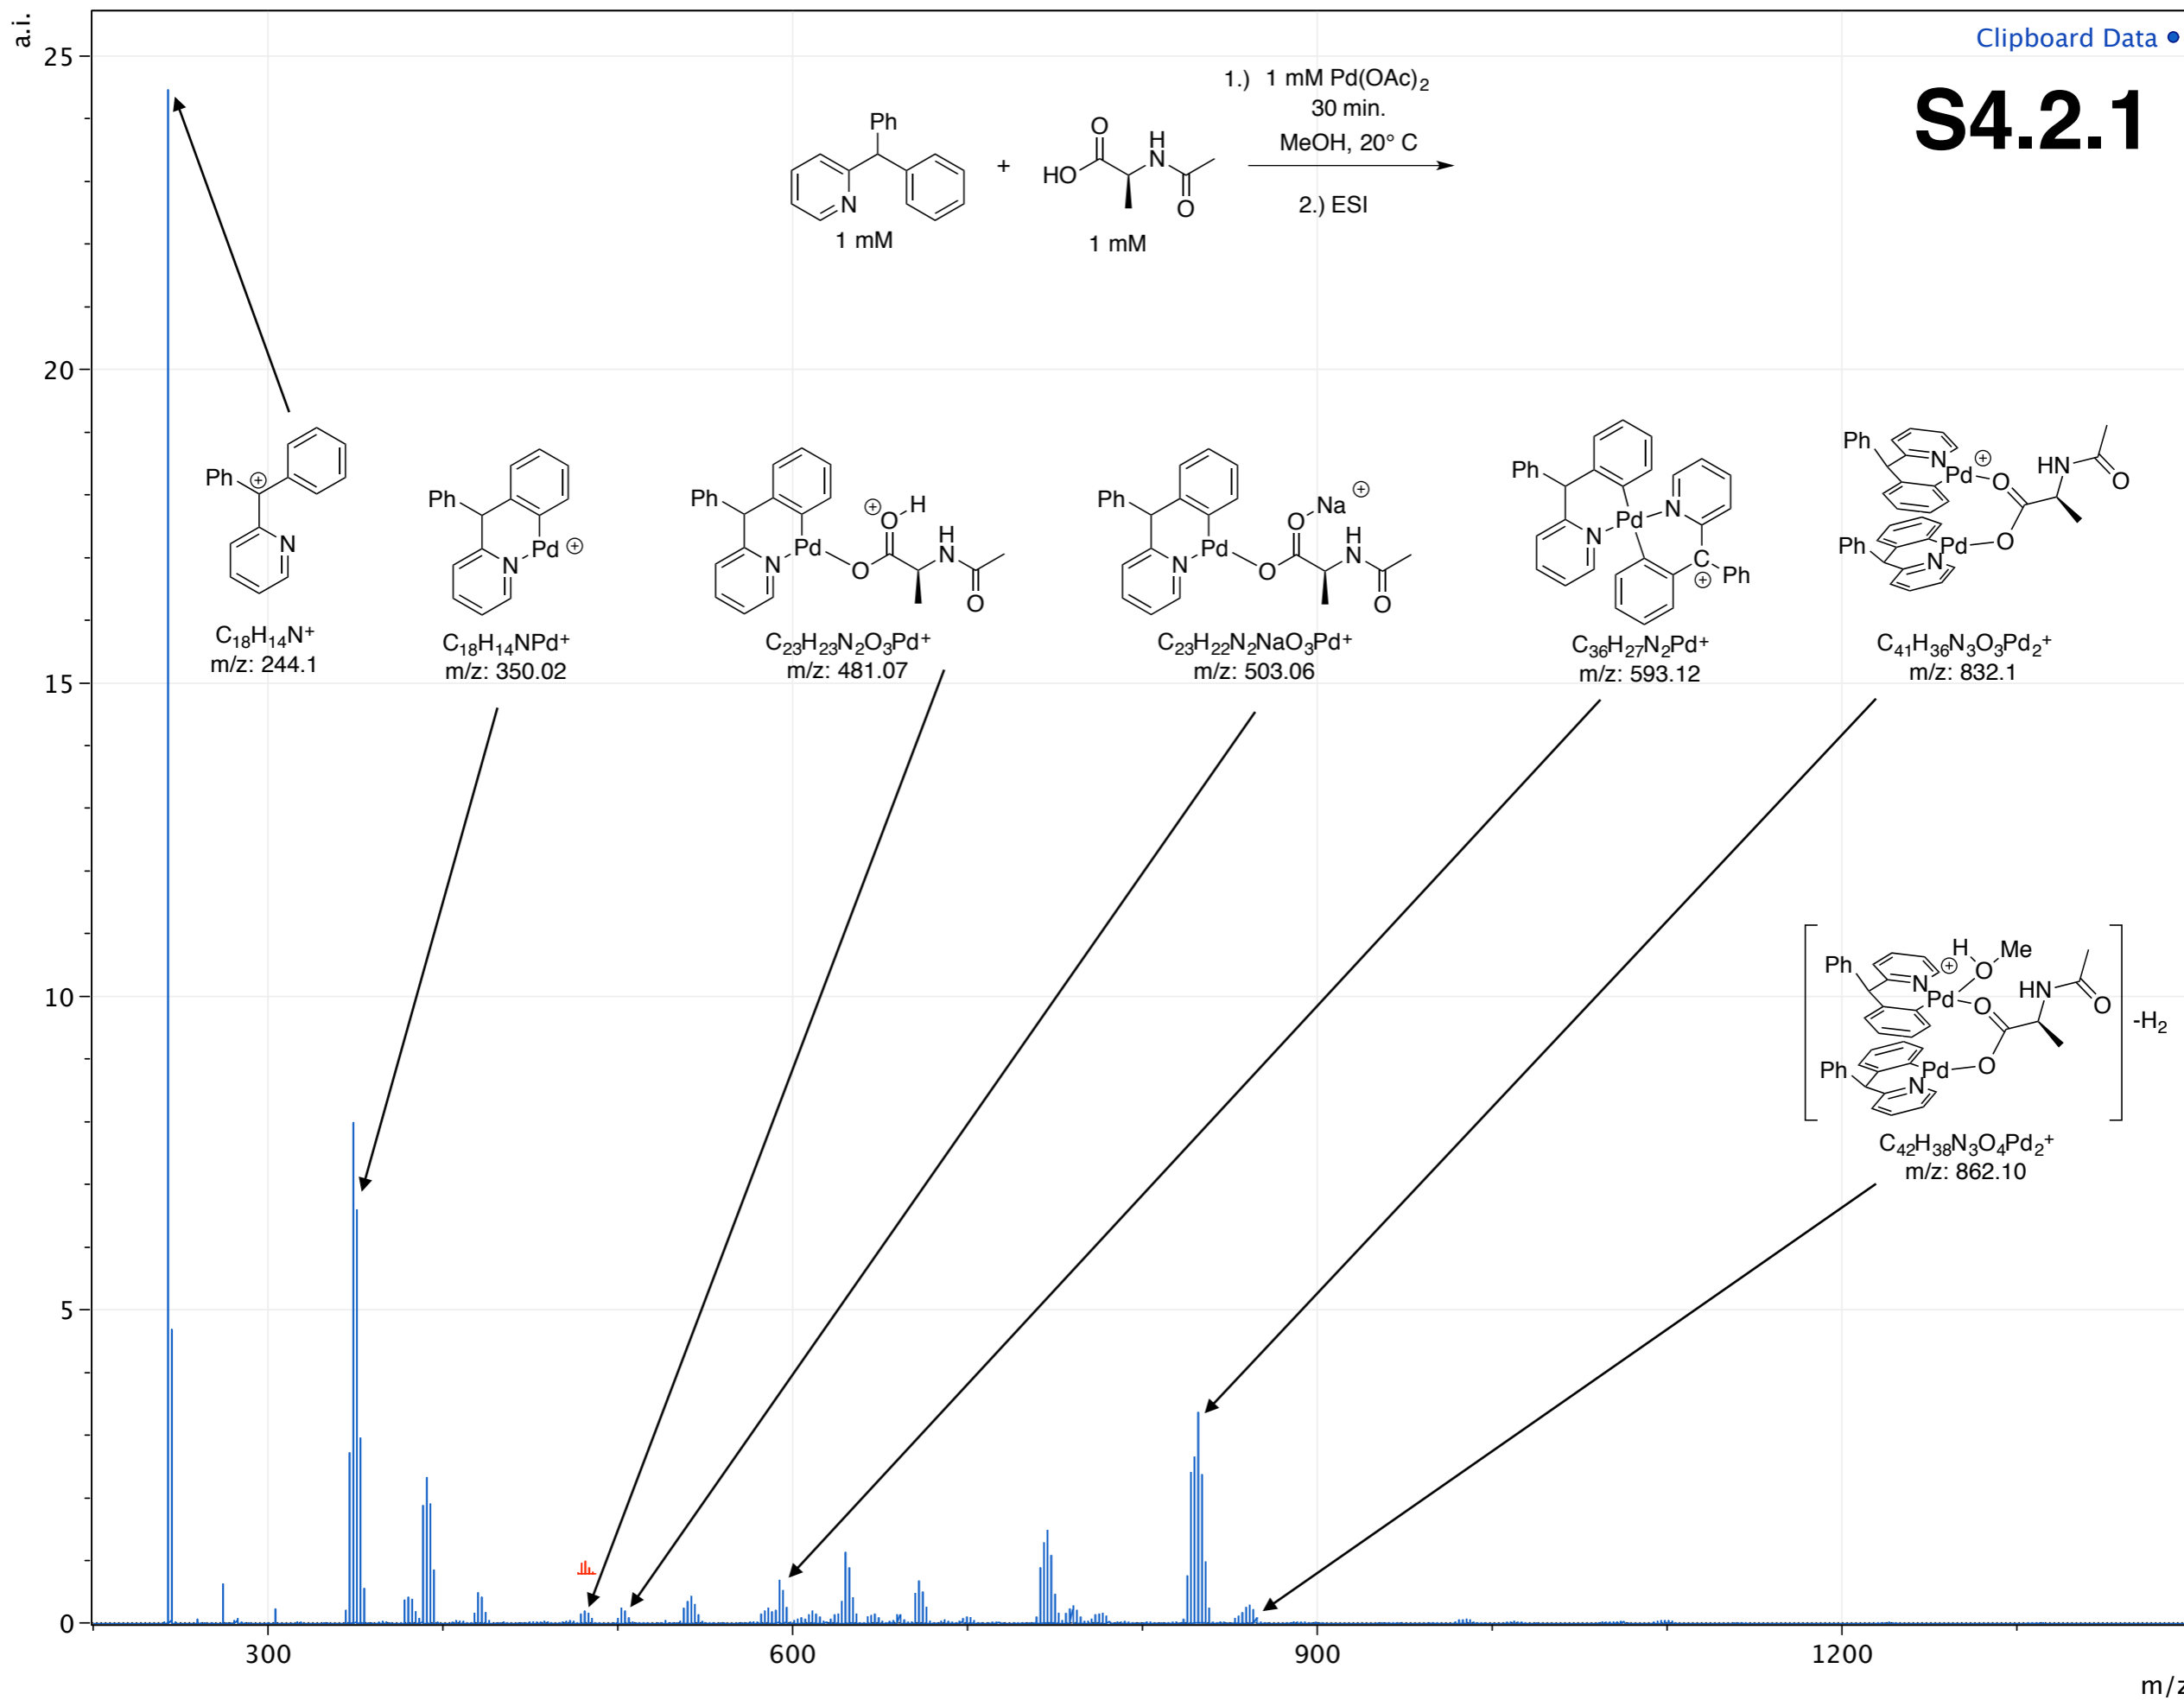

# S4.2.1

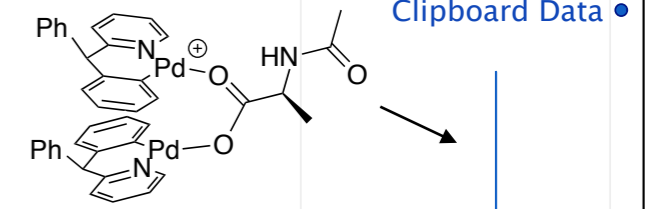

$C_{41}H_{36}N_3O_3Pd_2^+$   
m/z: 832.1

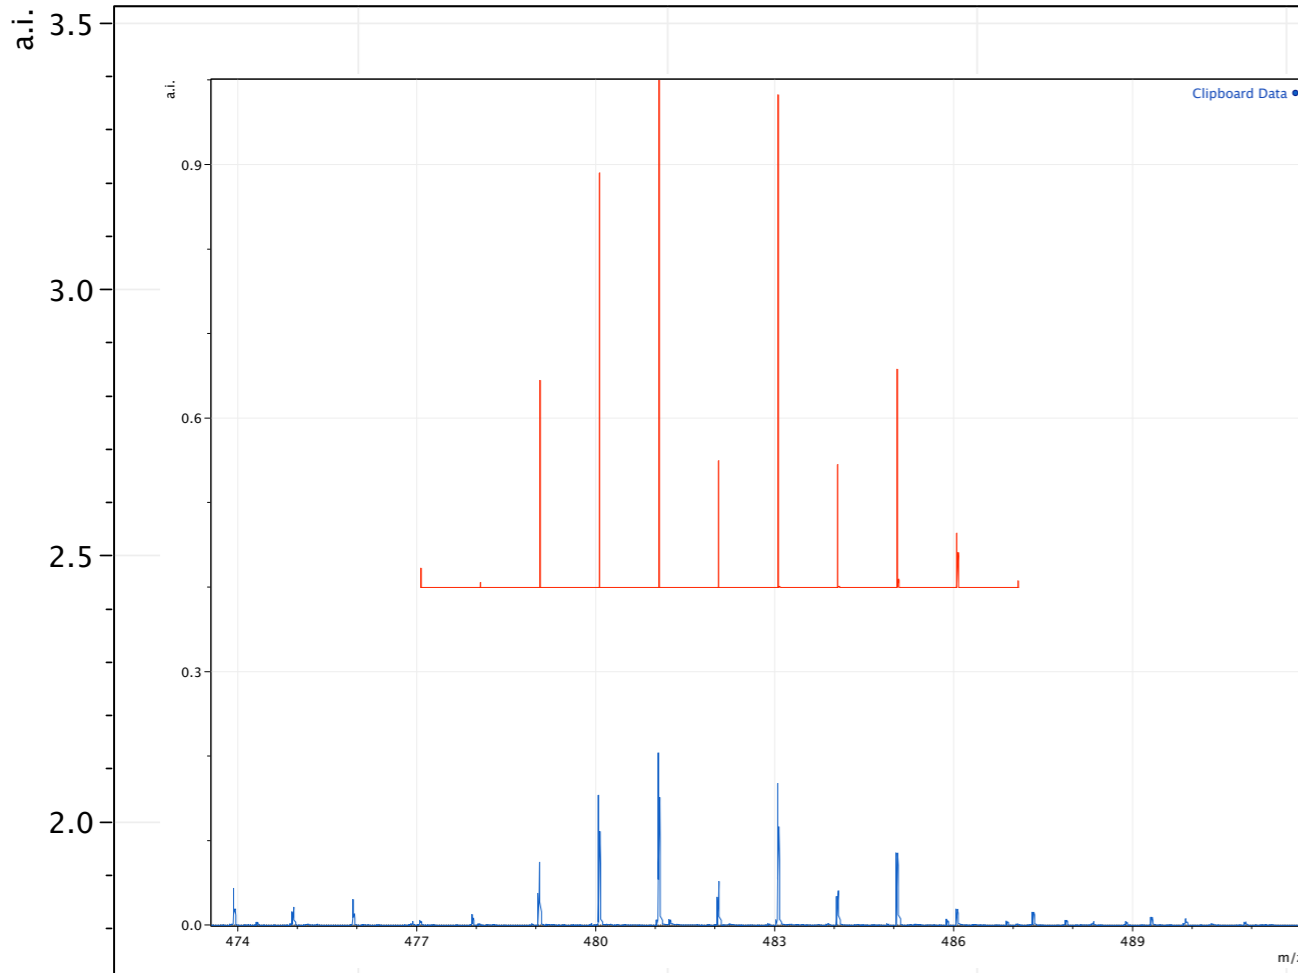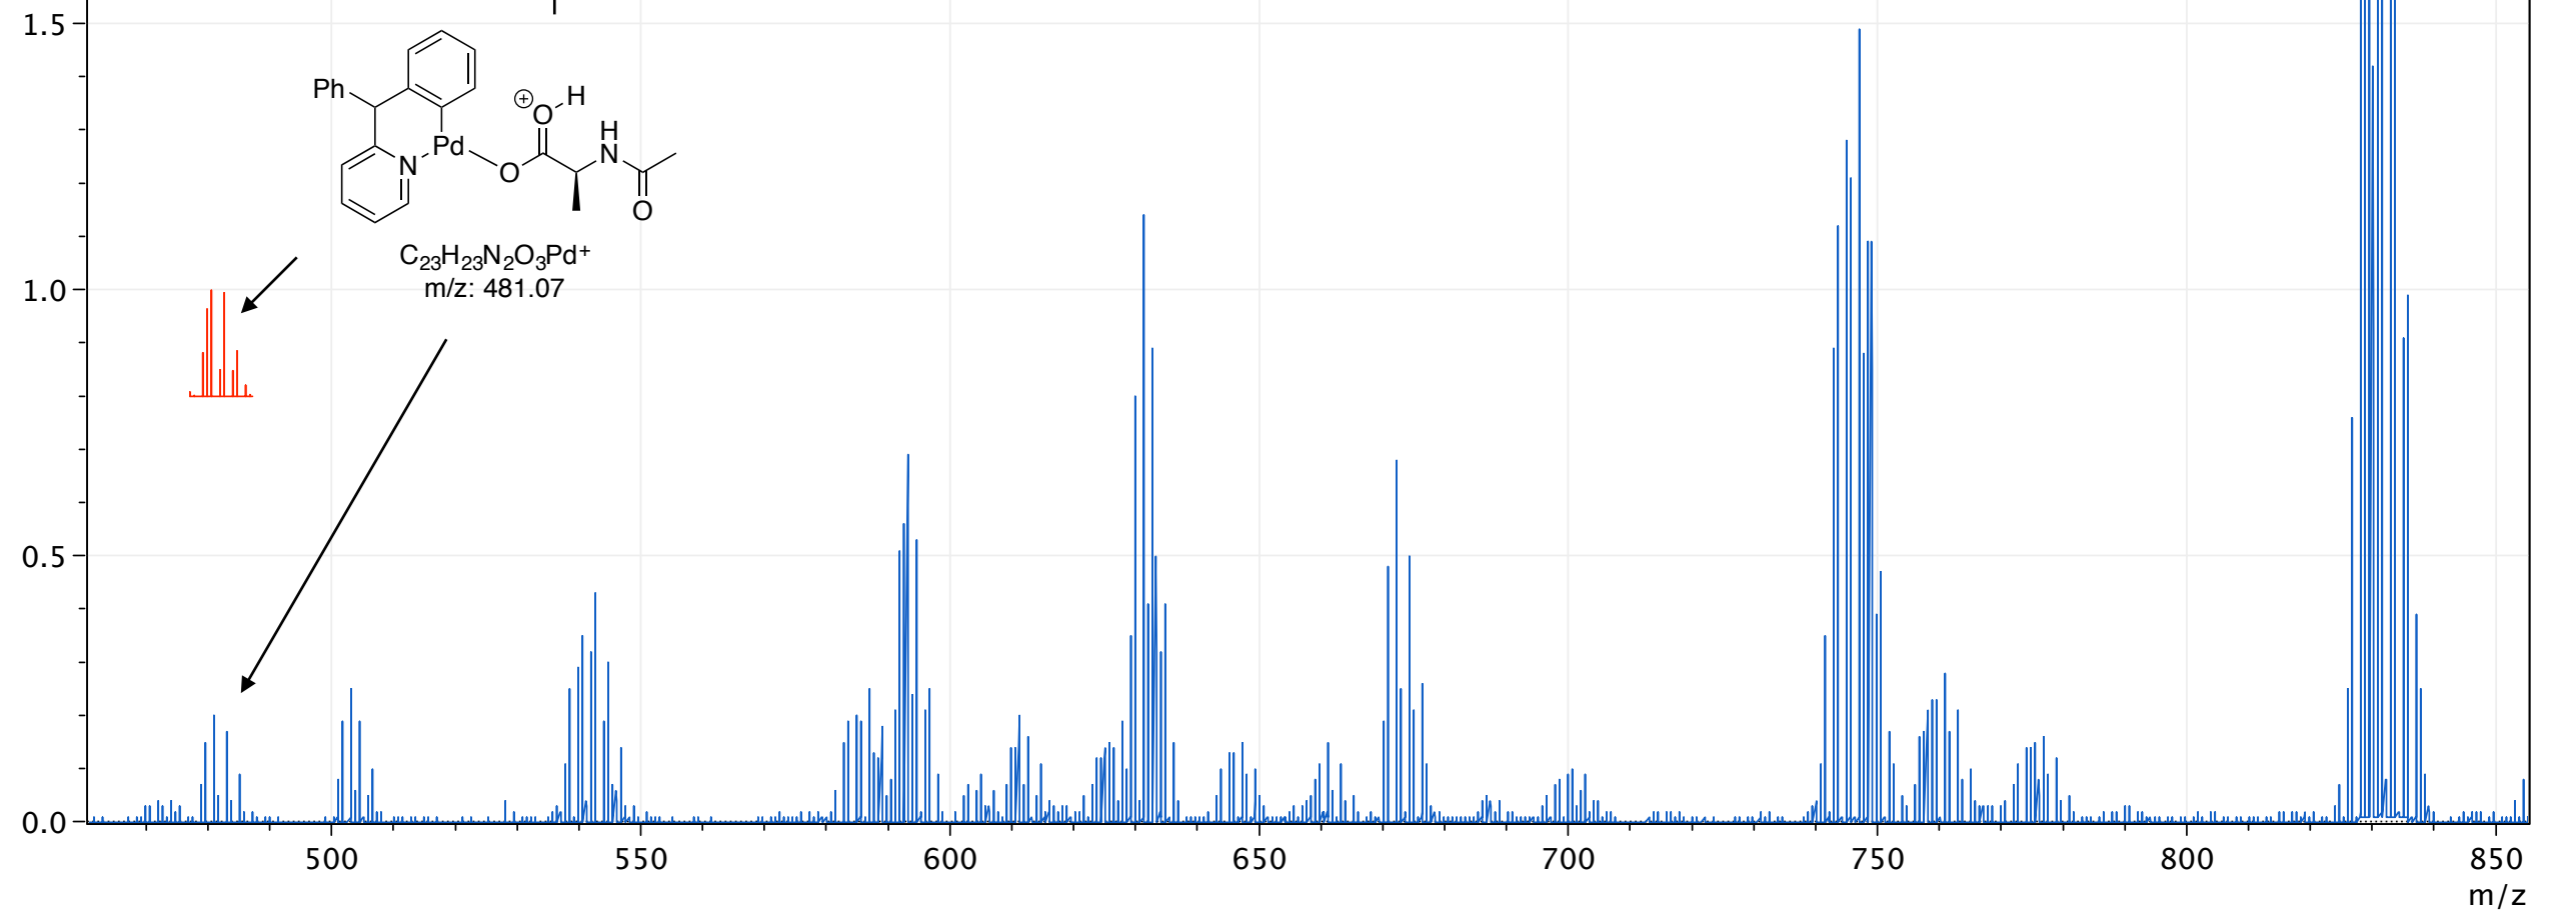

**S4.2.3**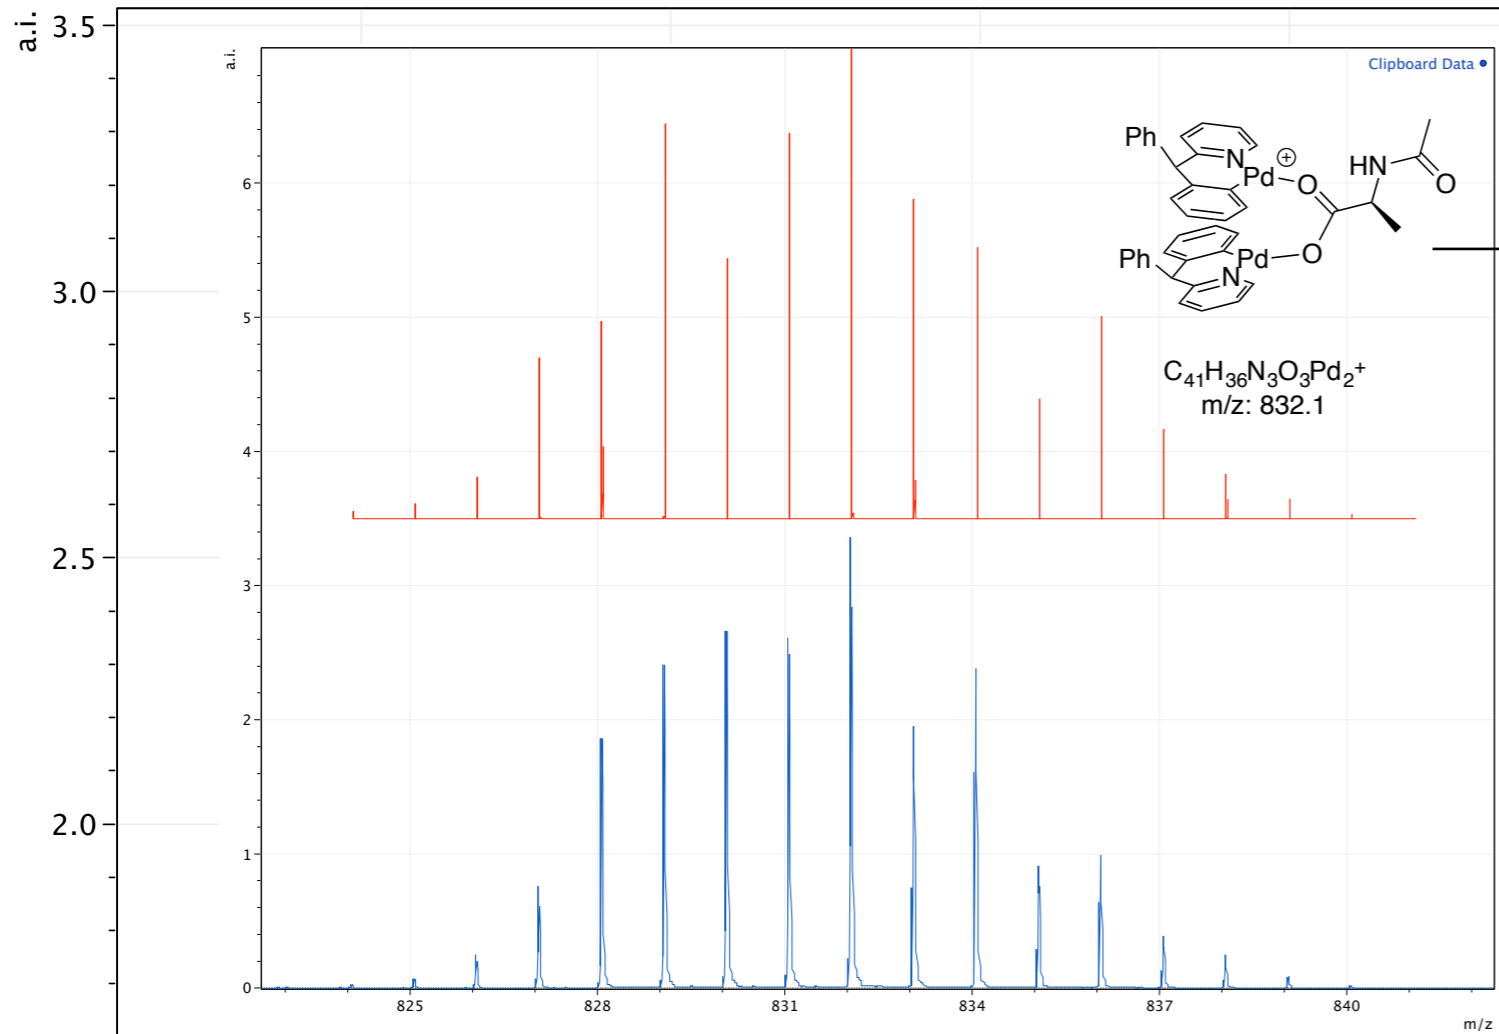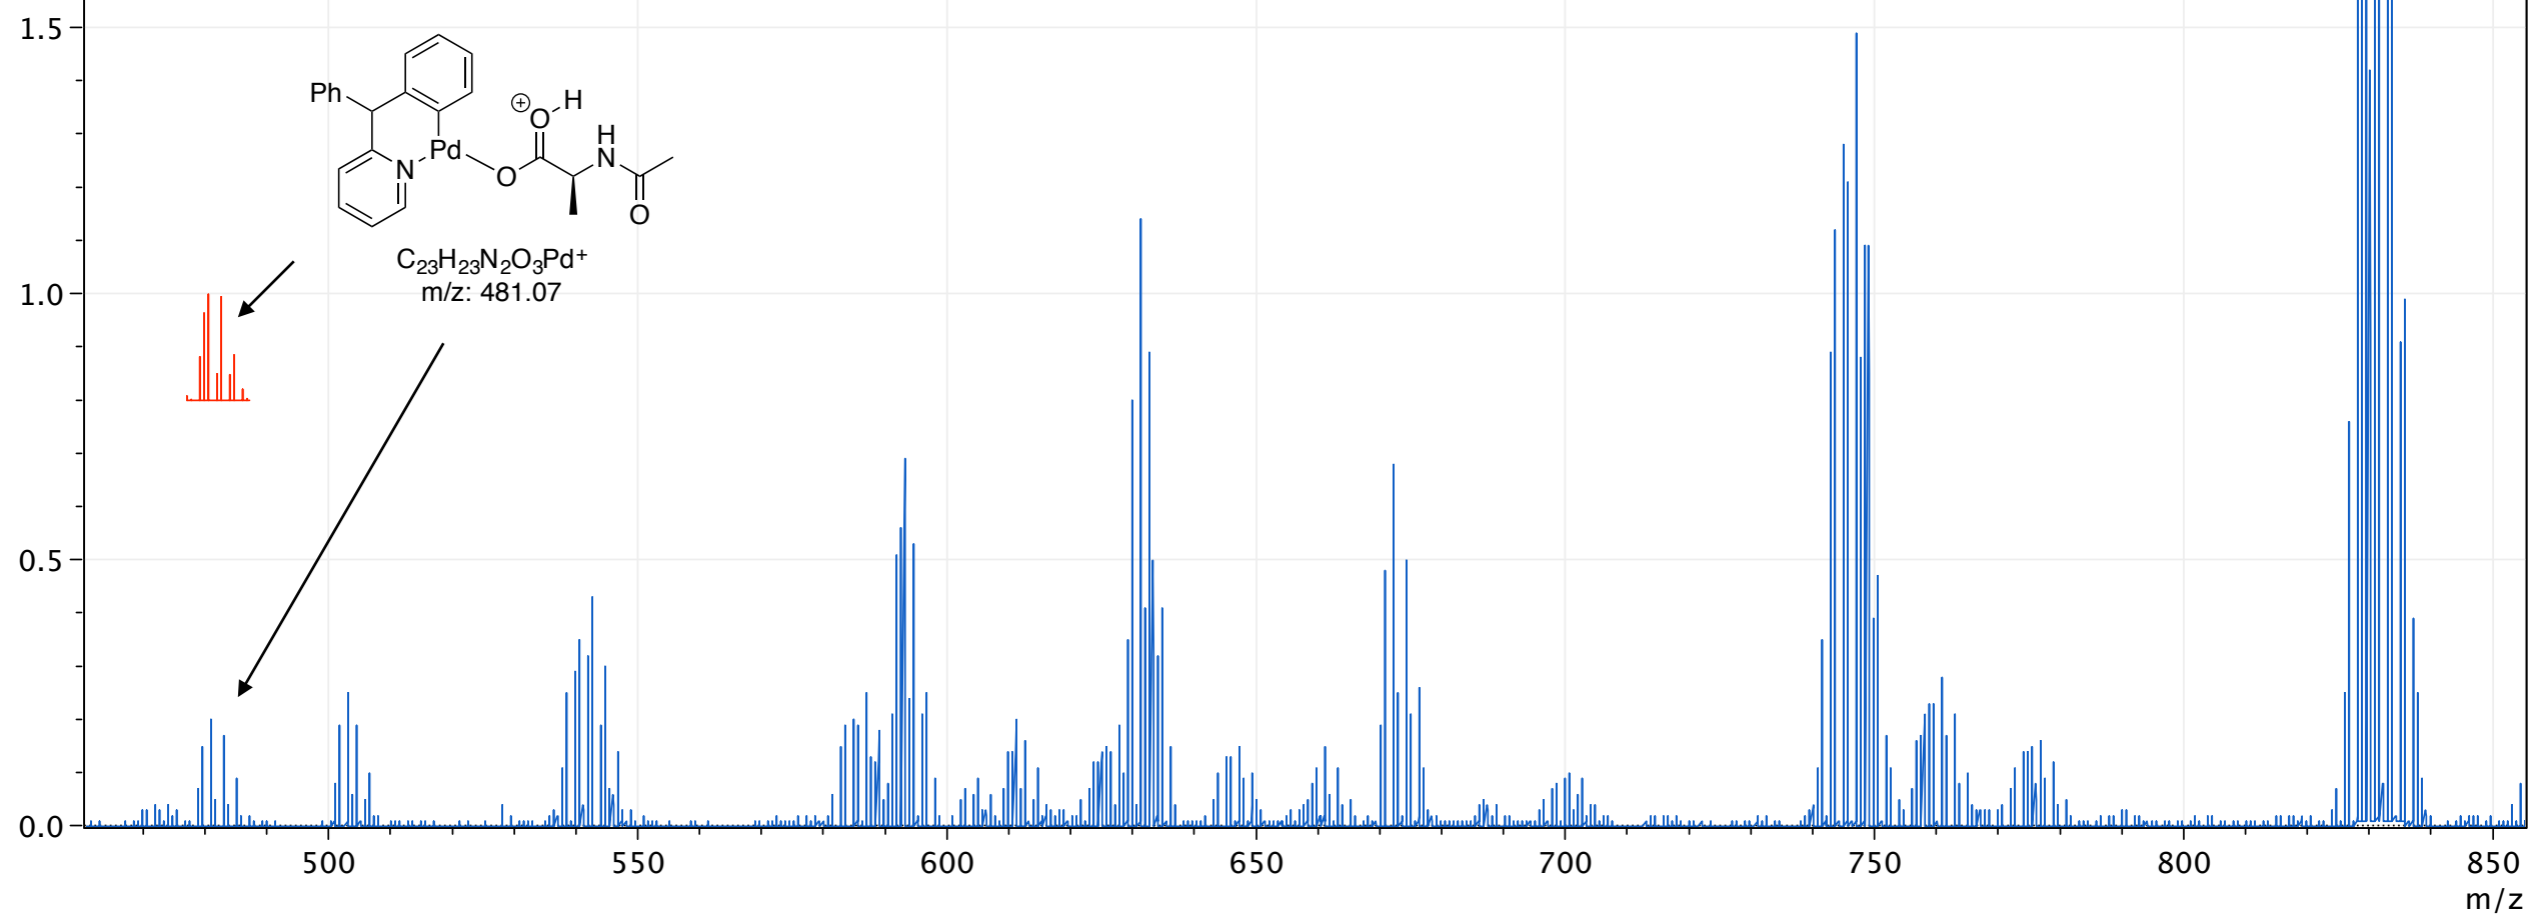

## S4.2.4

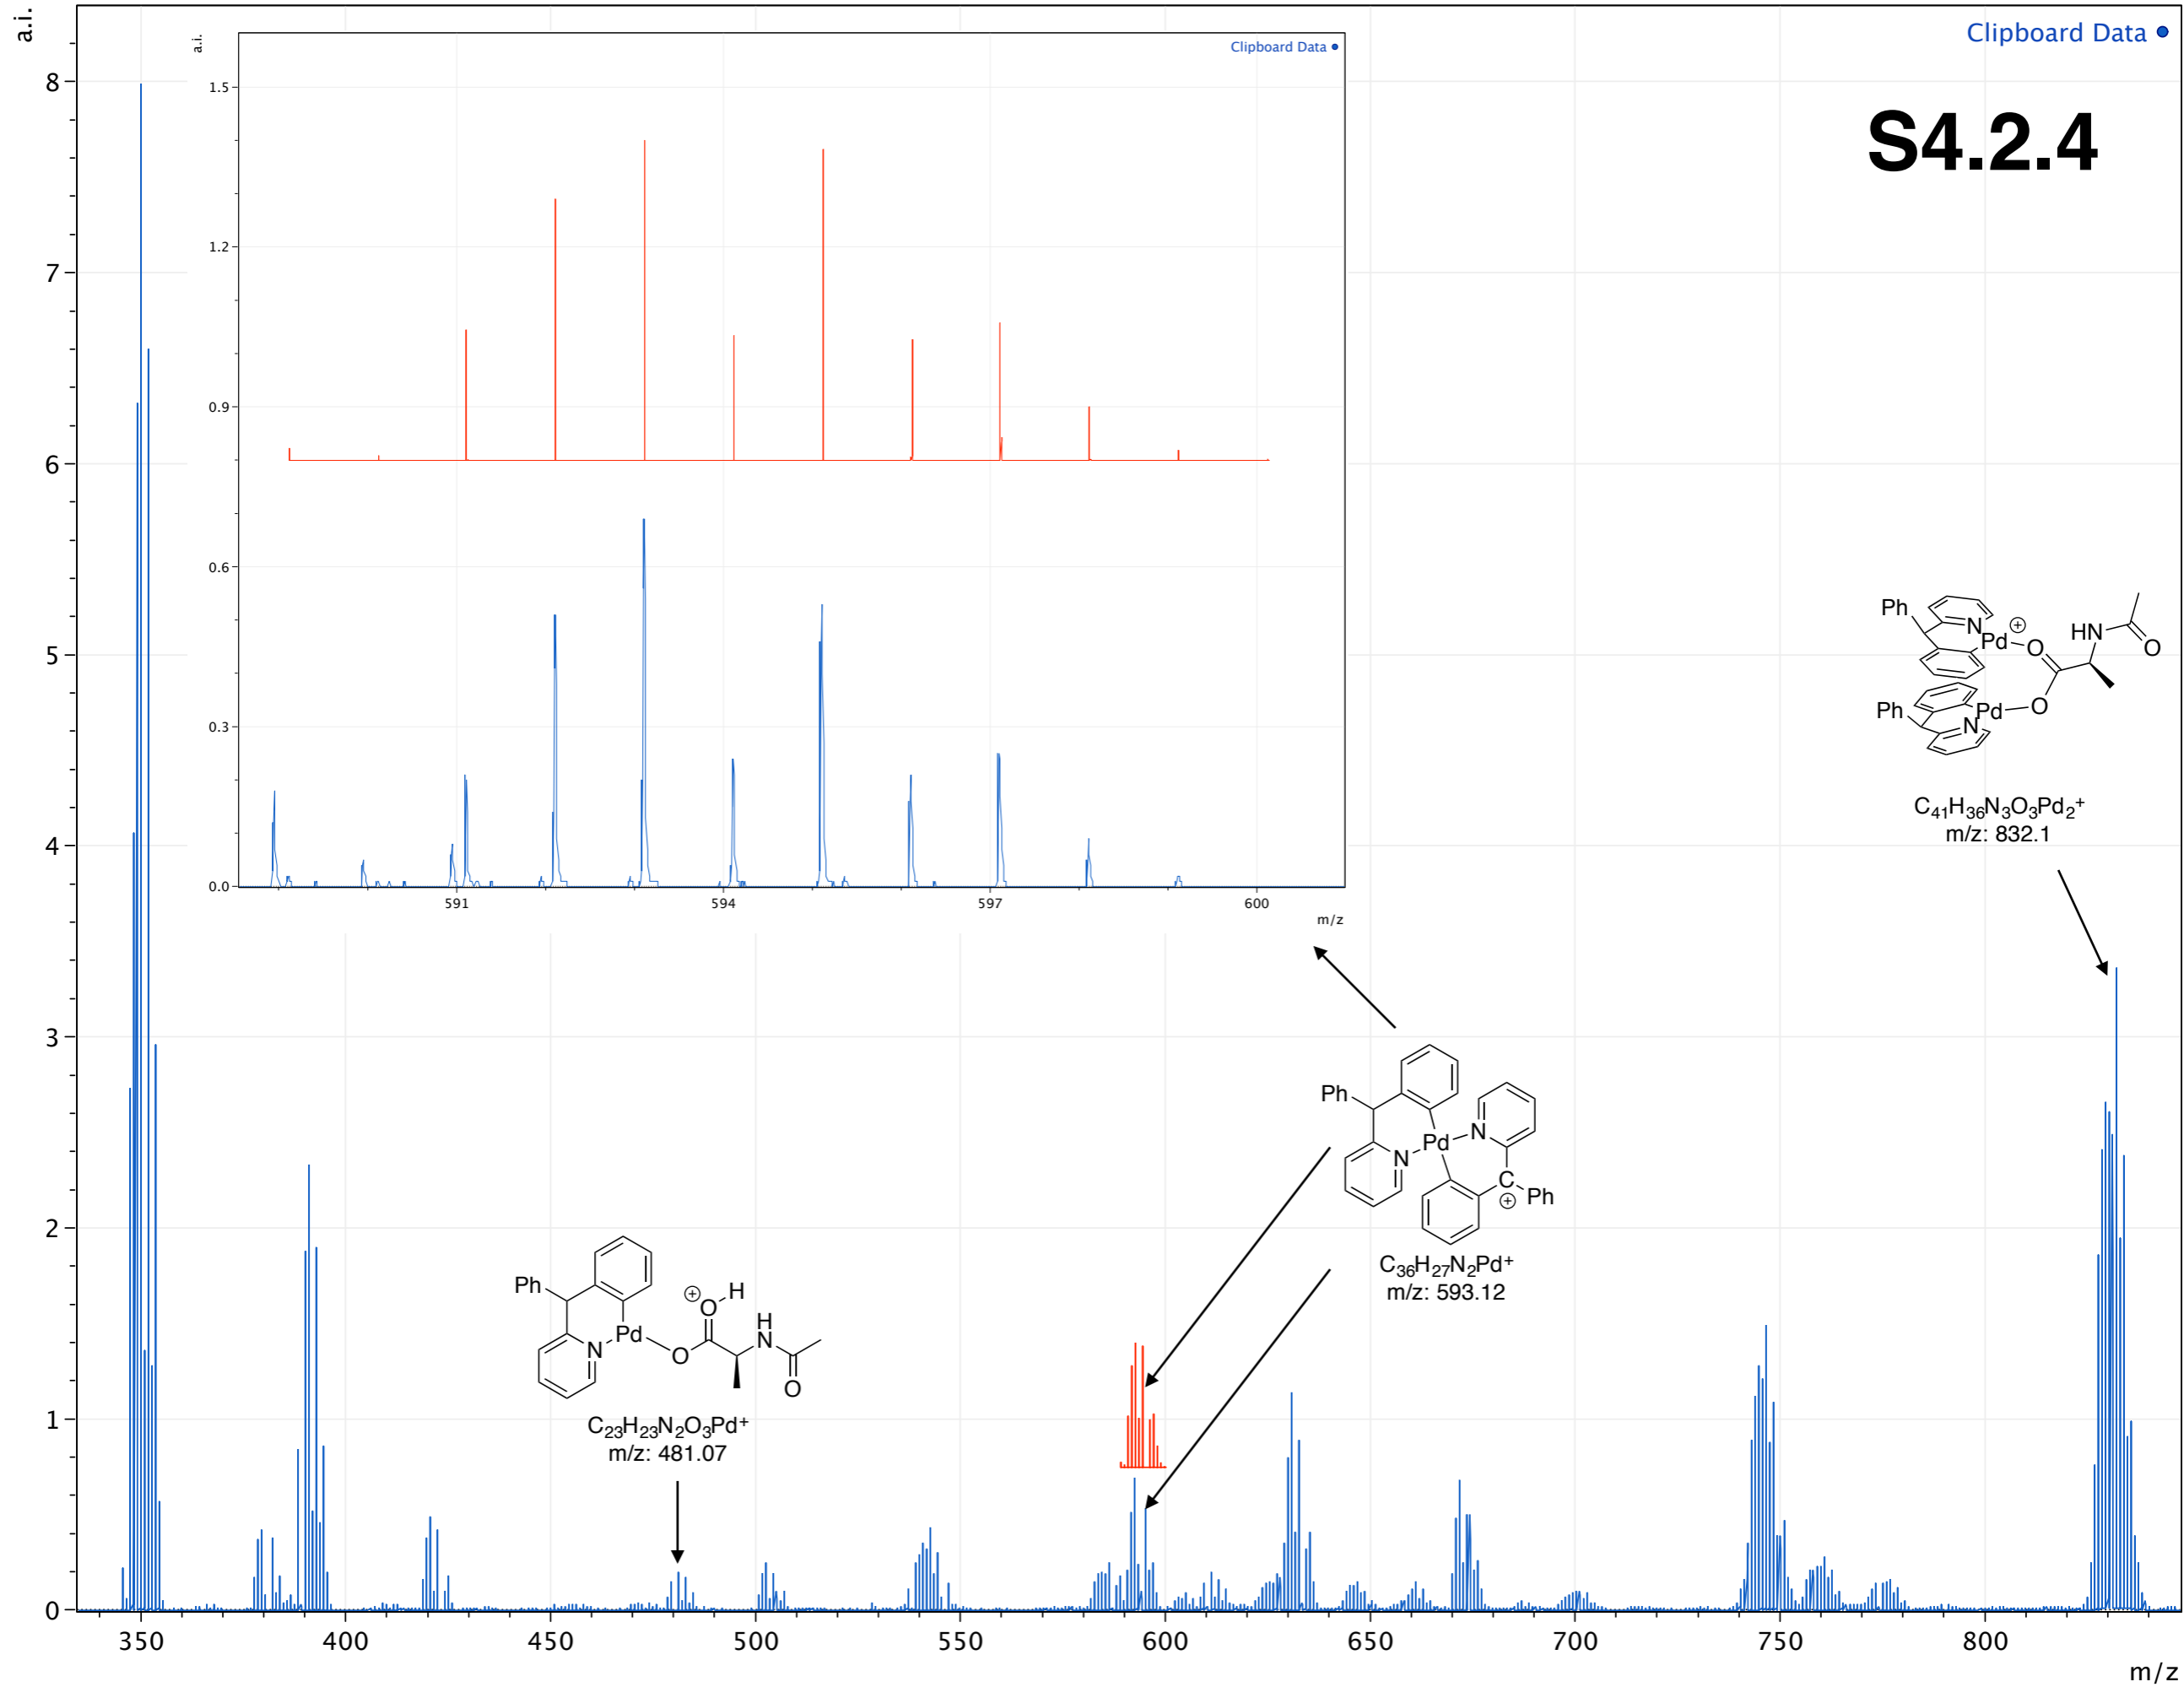

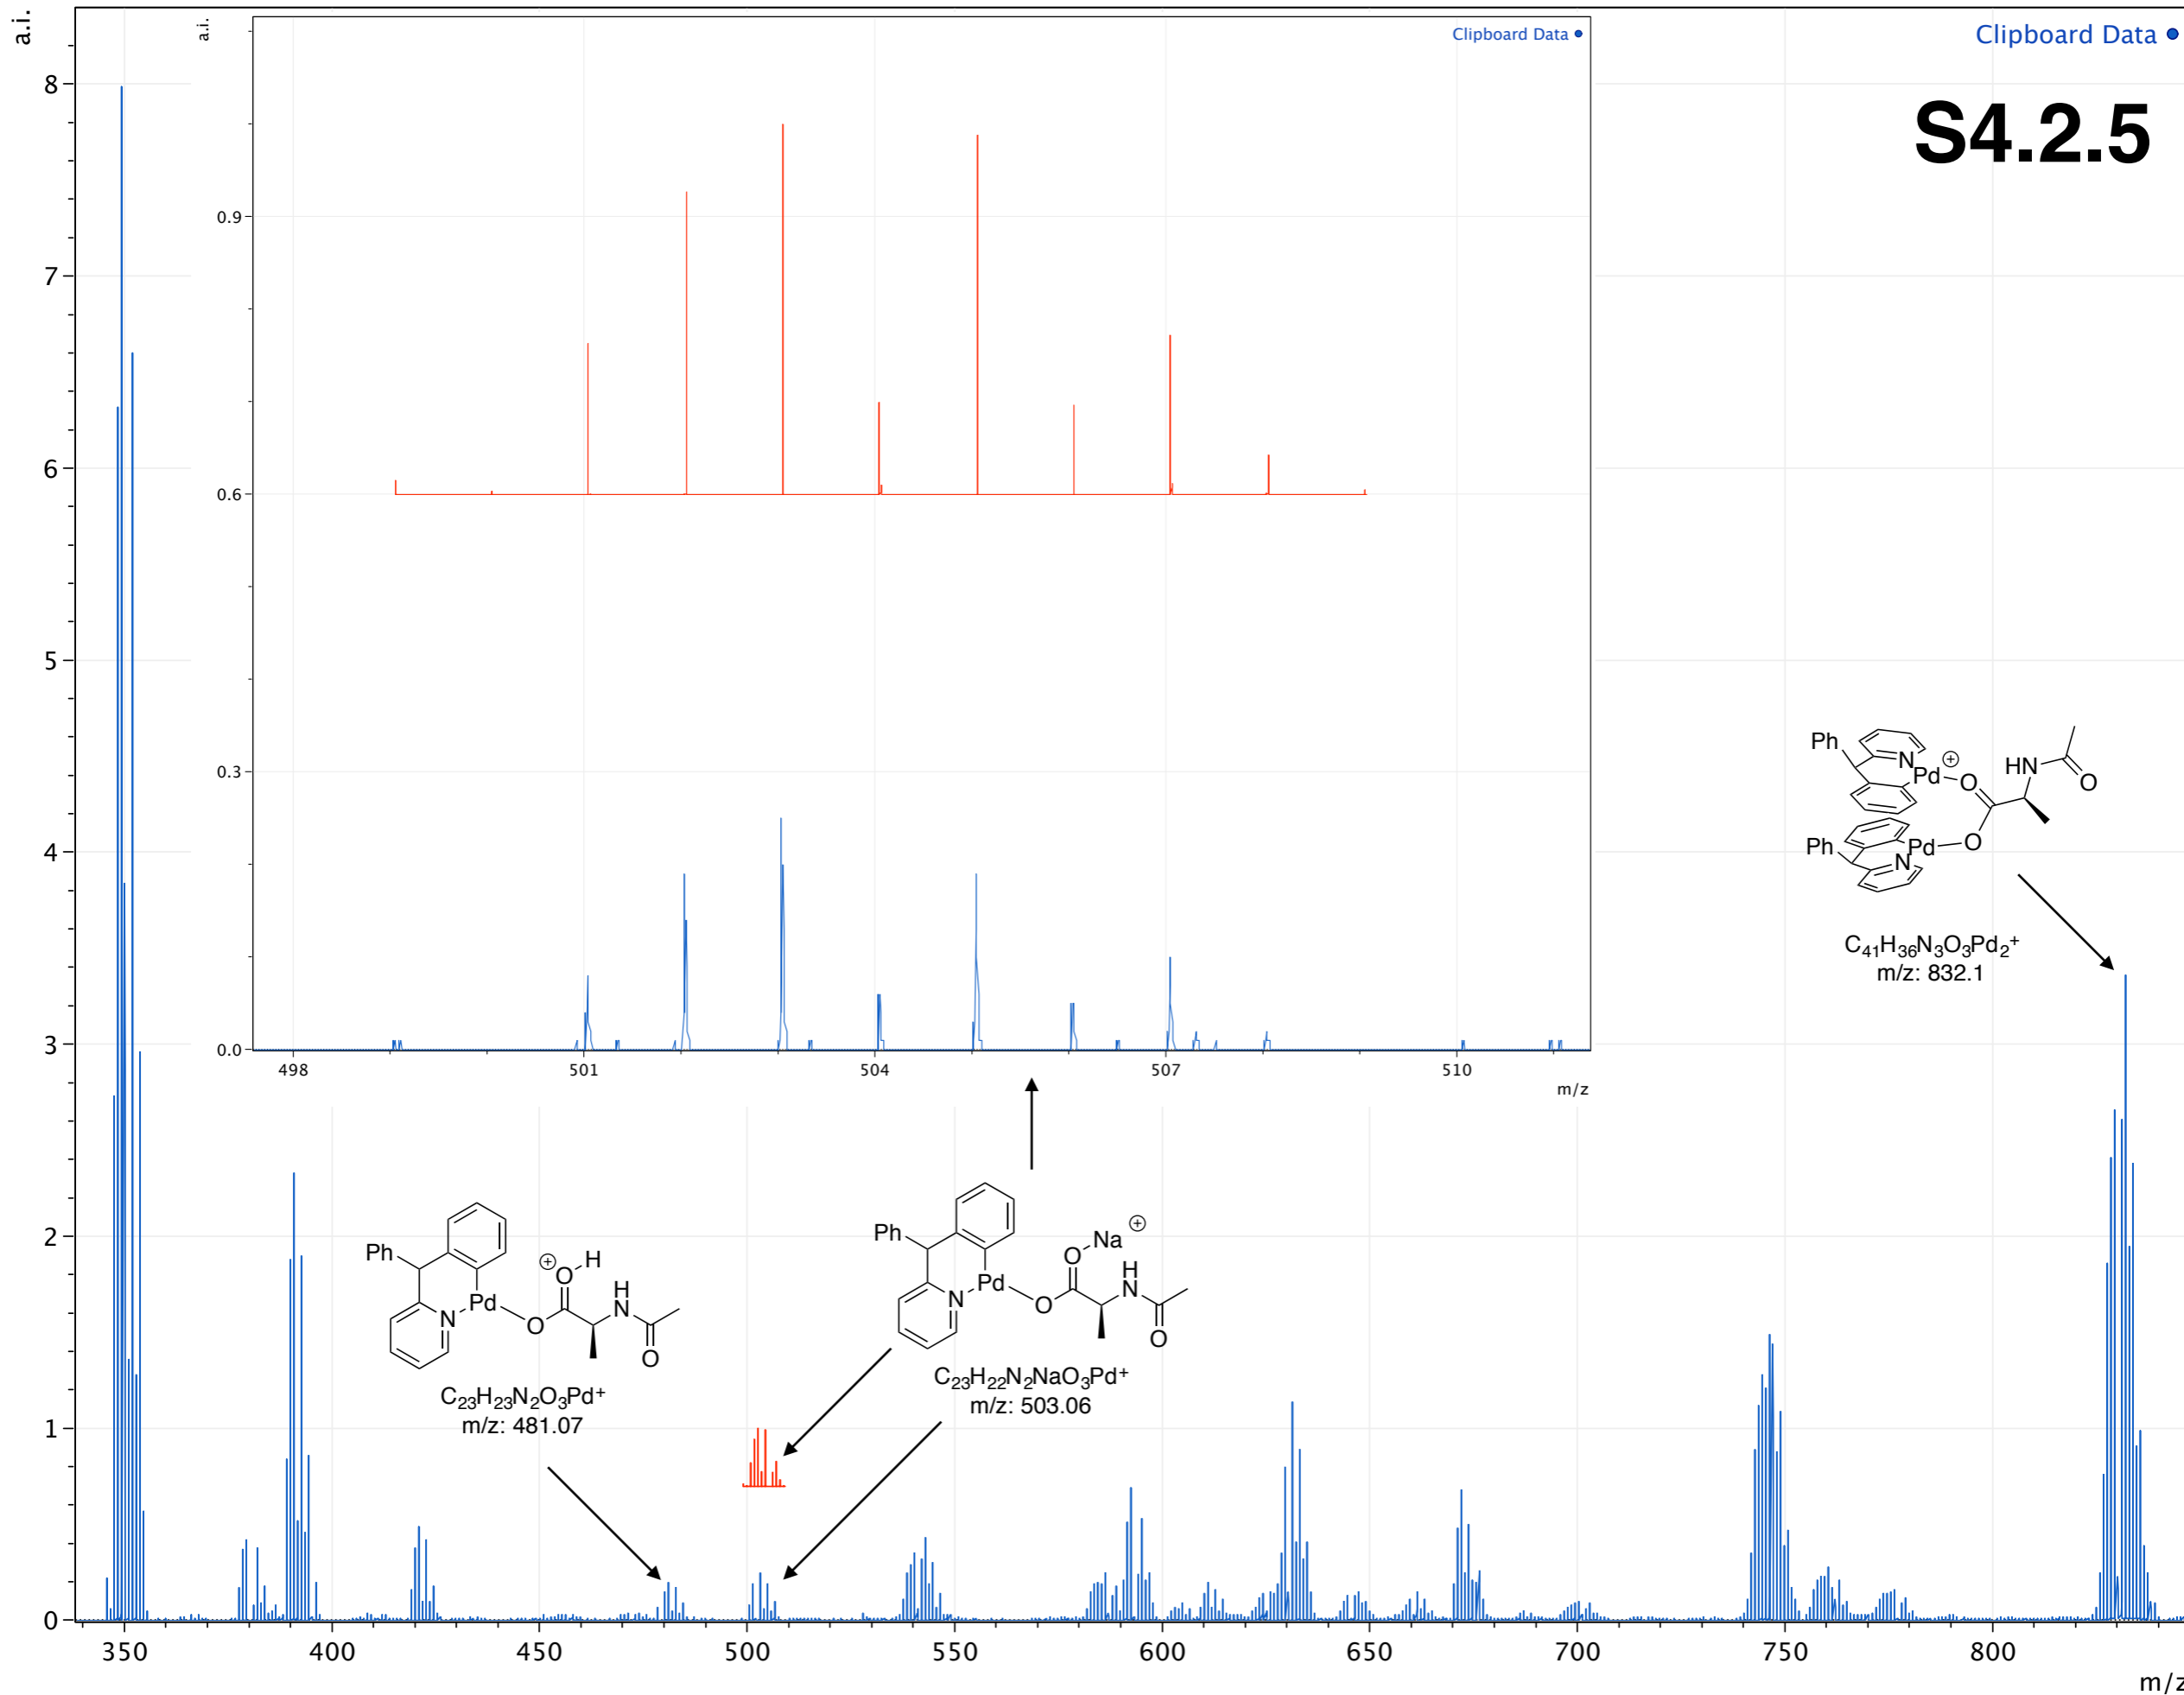

## S4.2.6

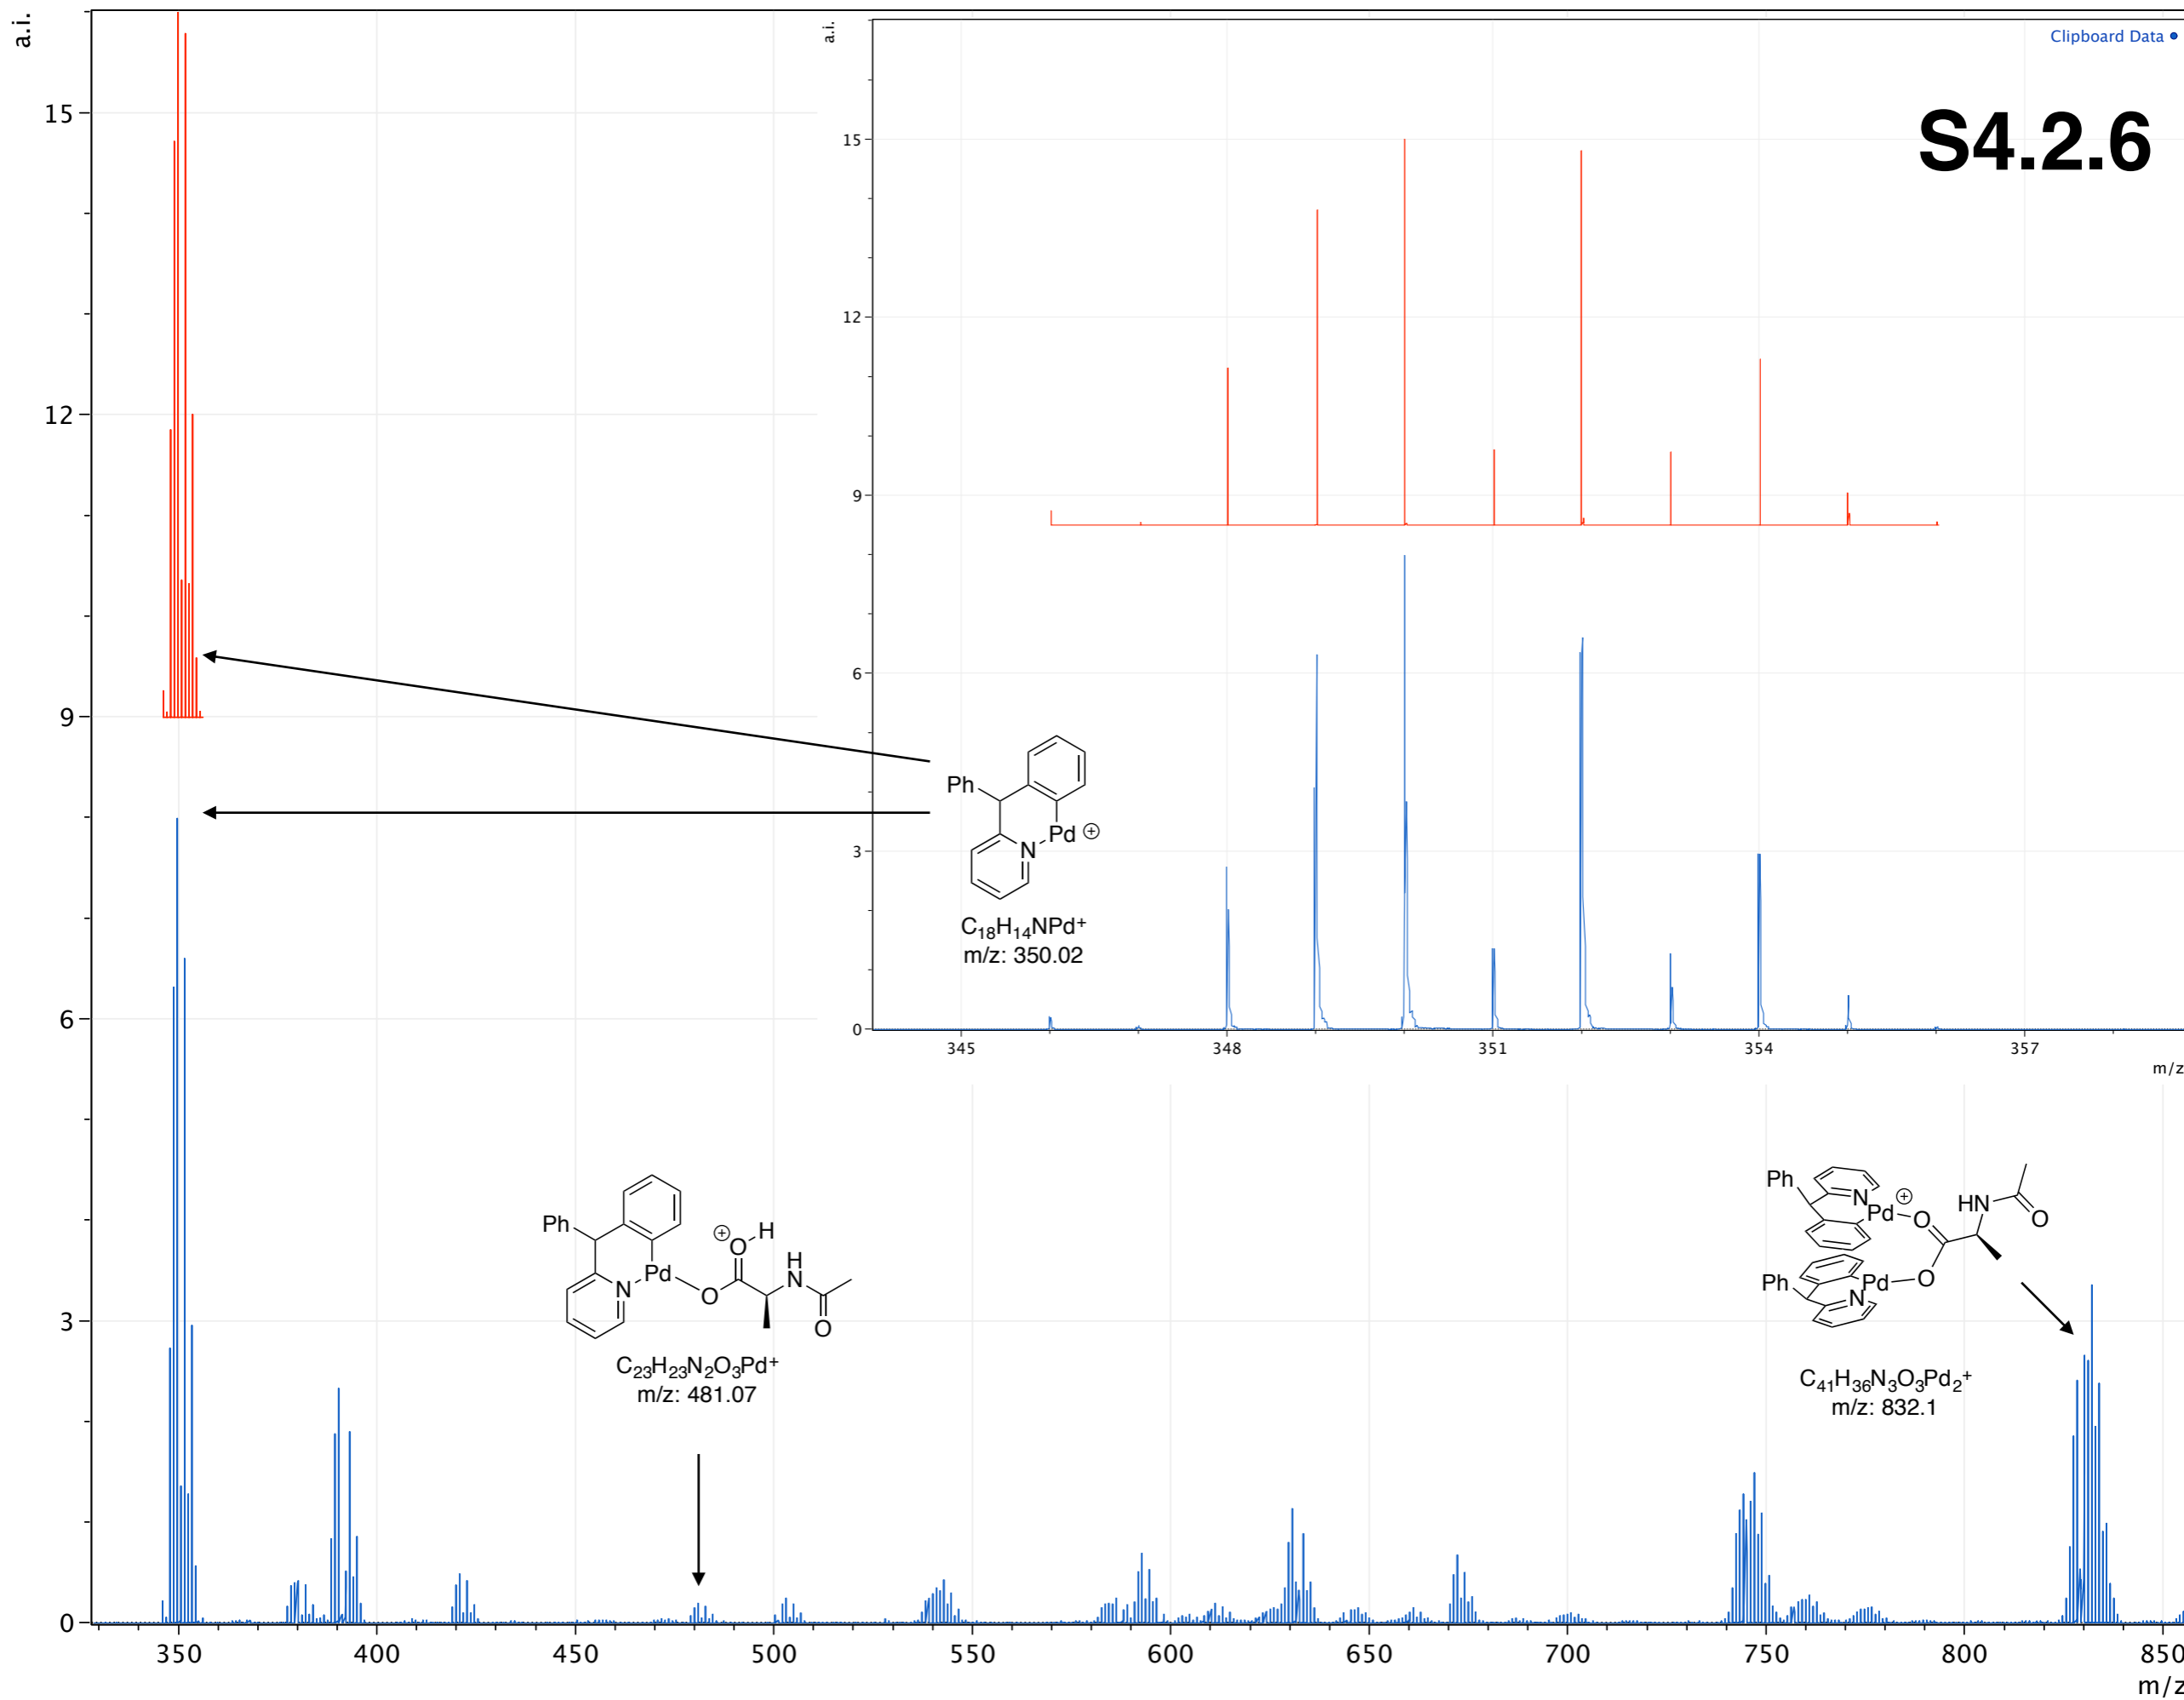

# S4.2.7

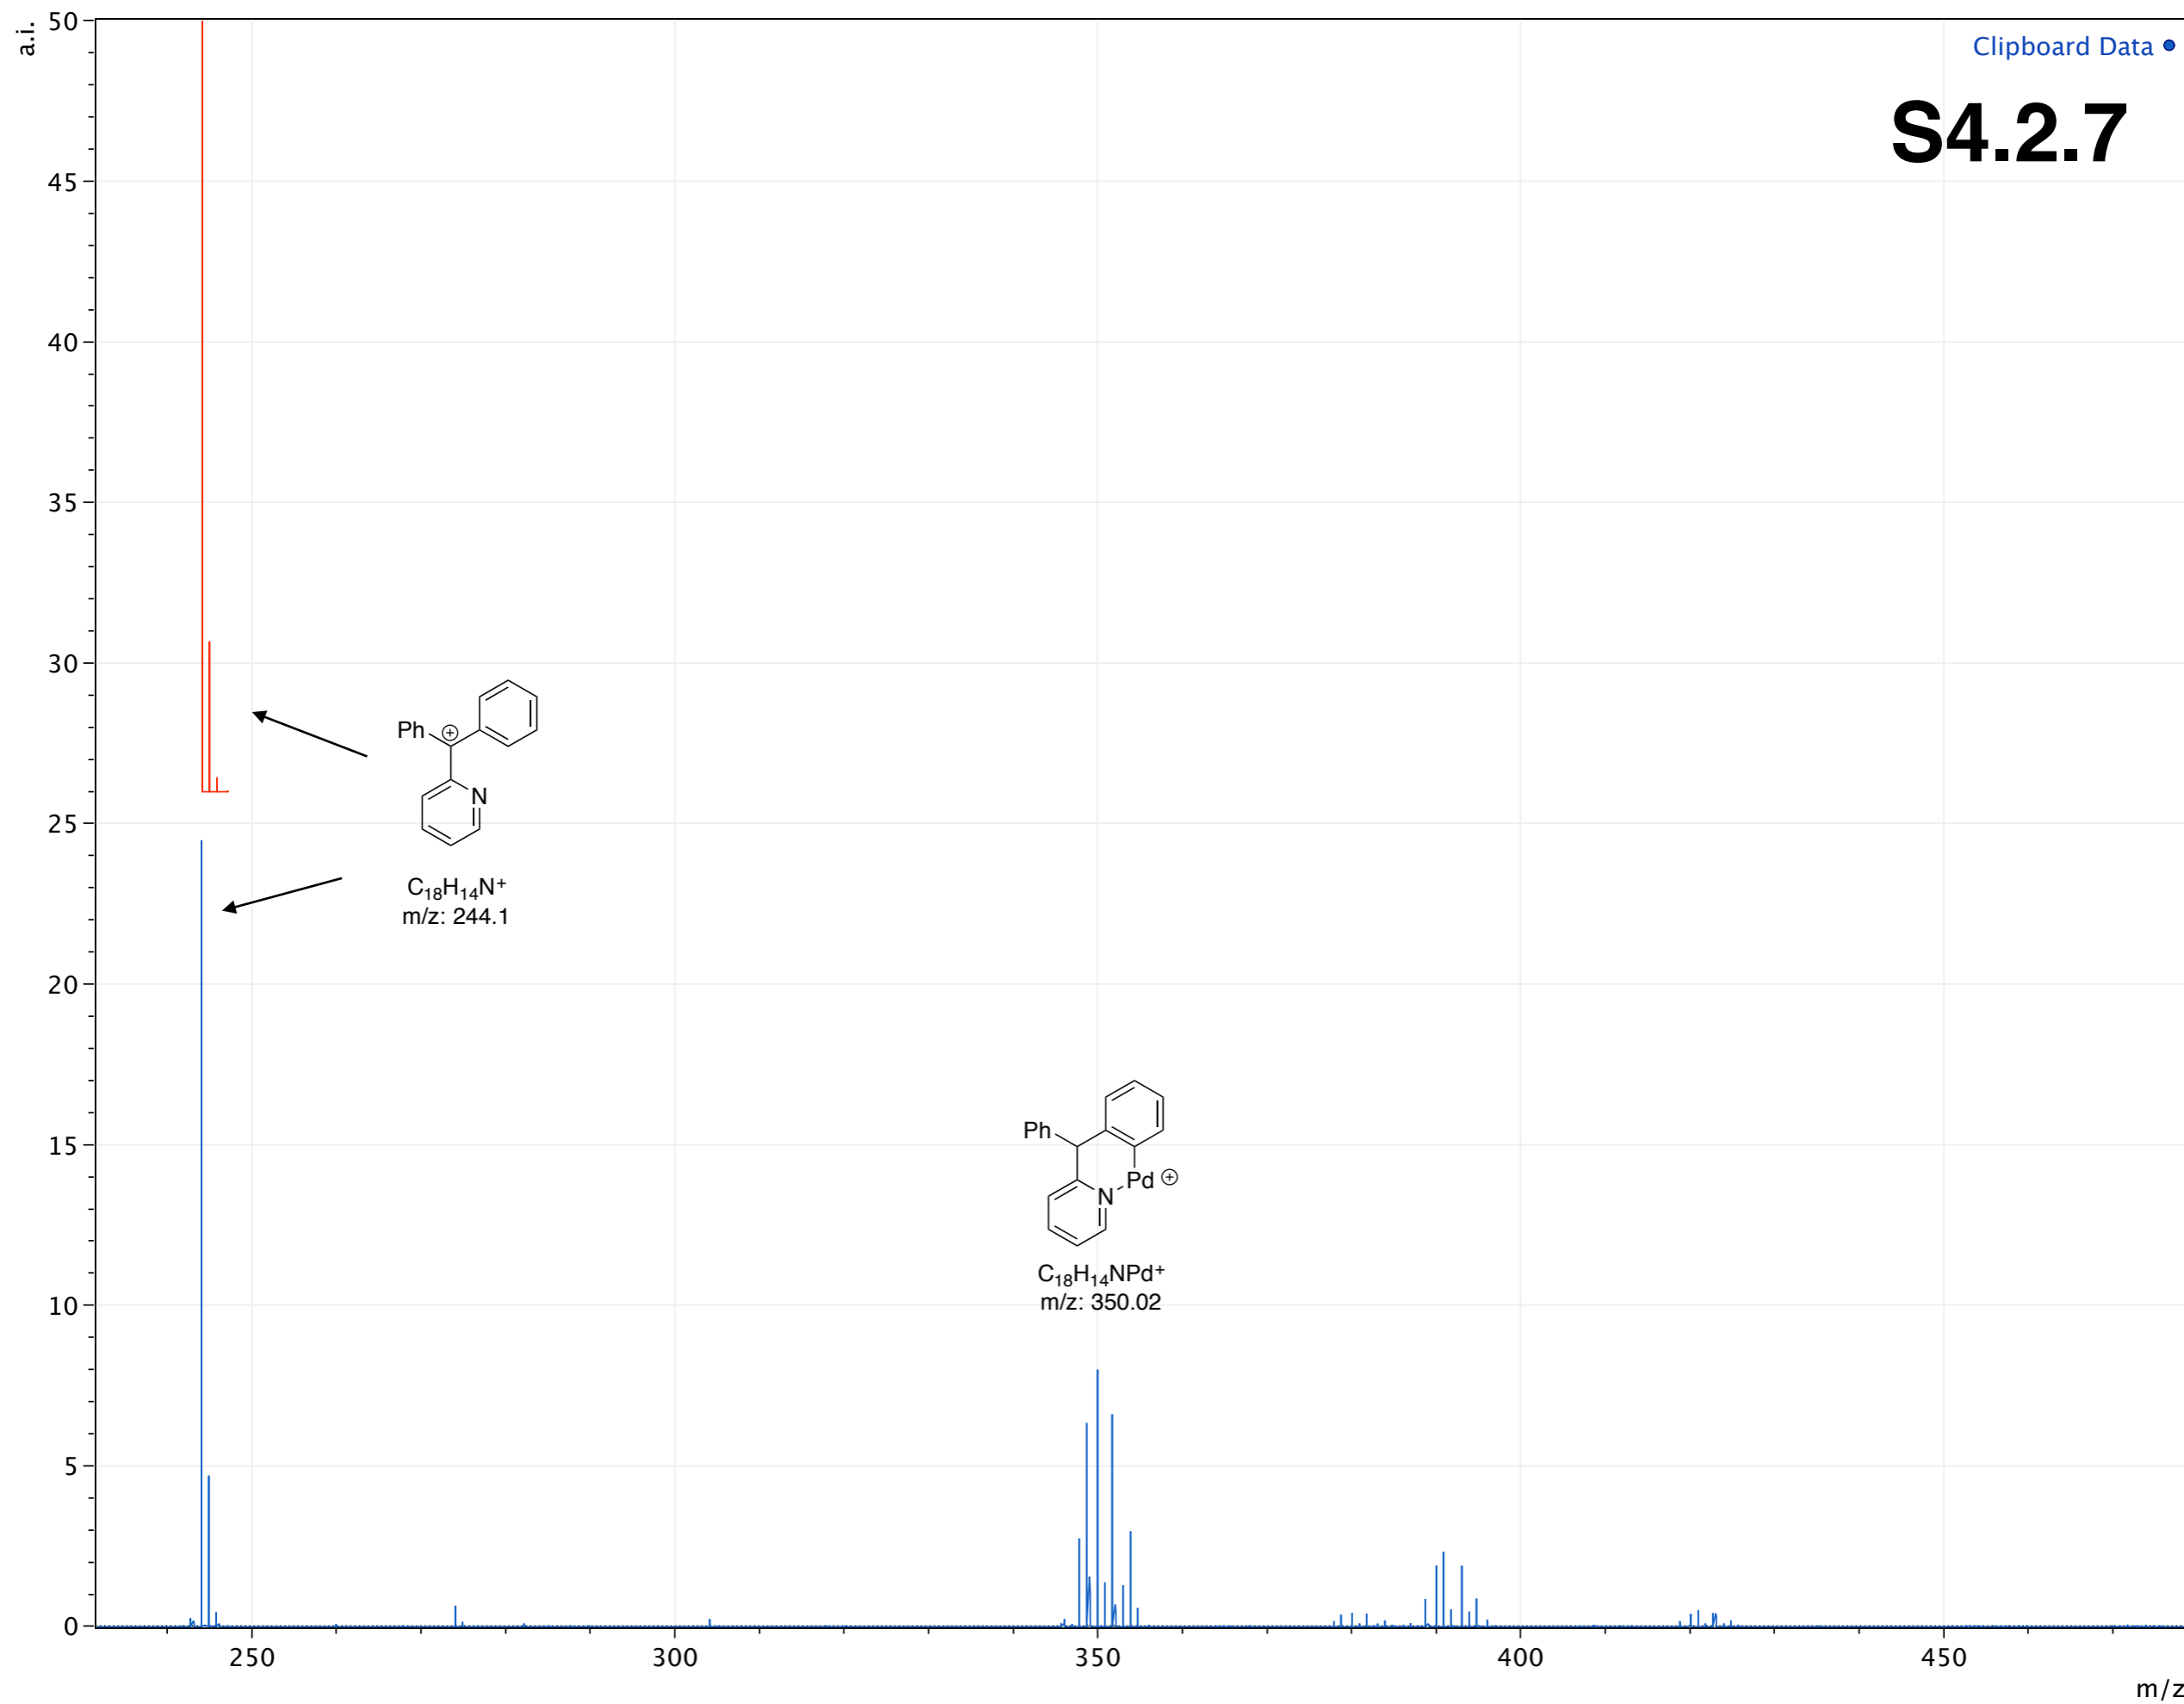



## S4.3.1

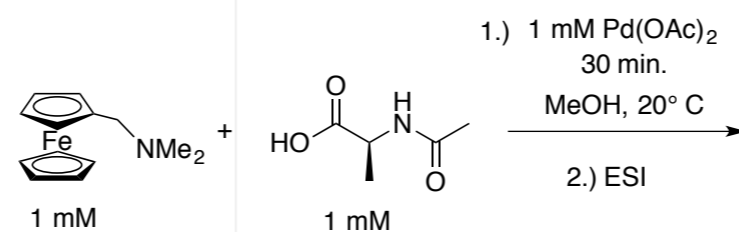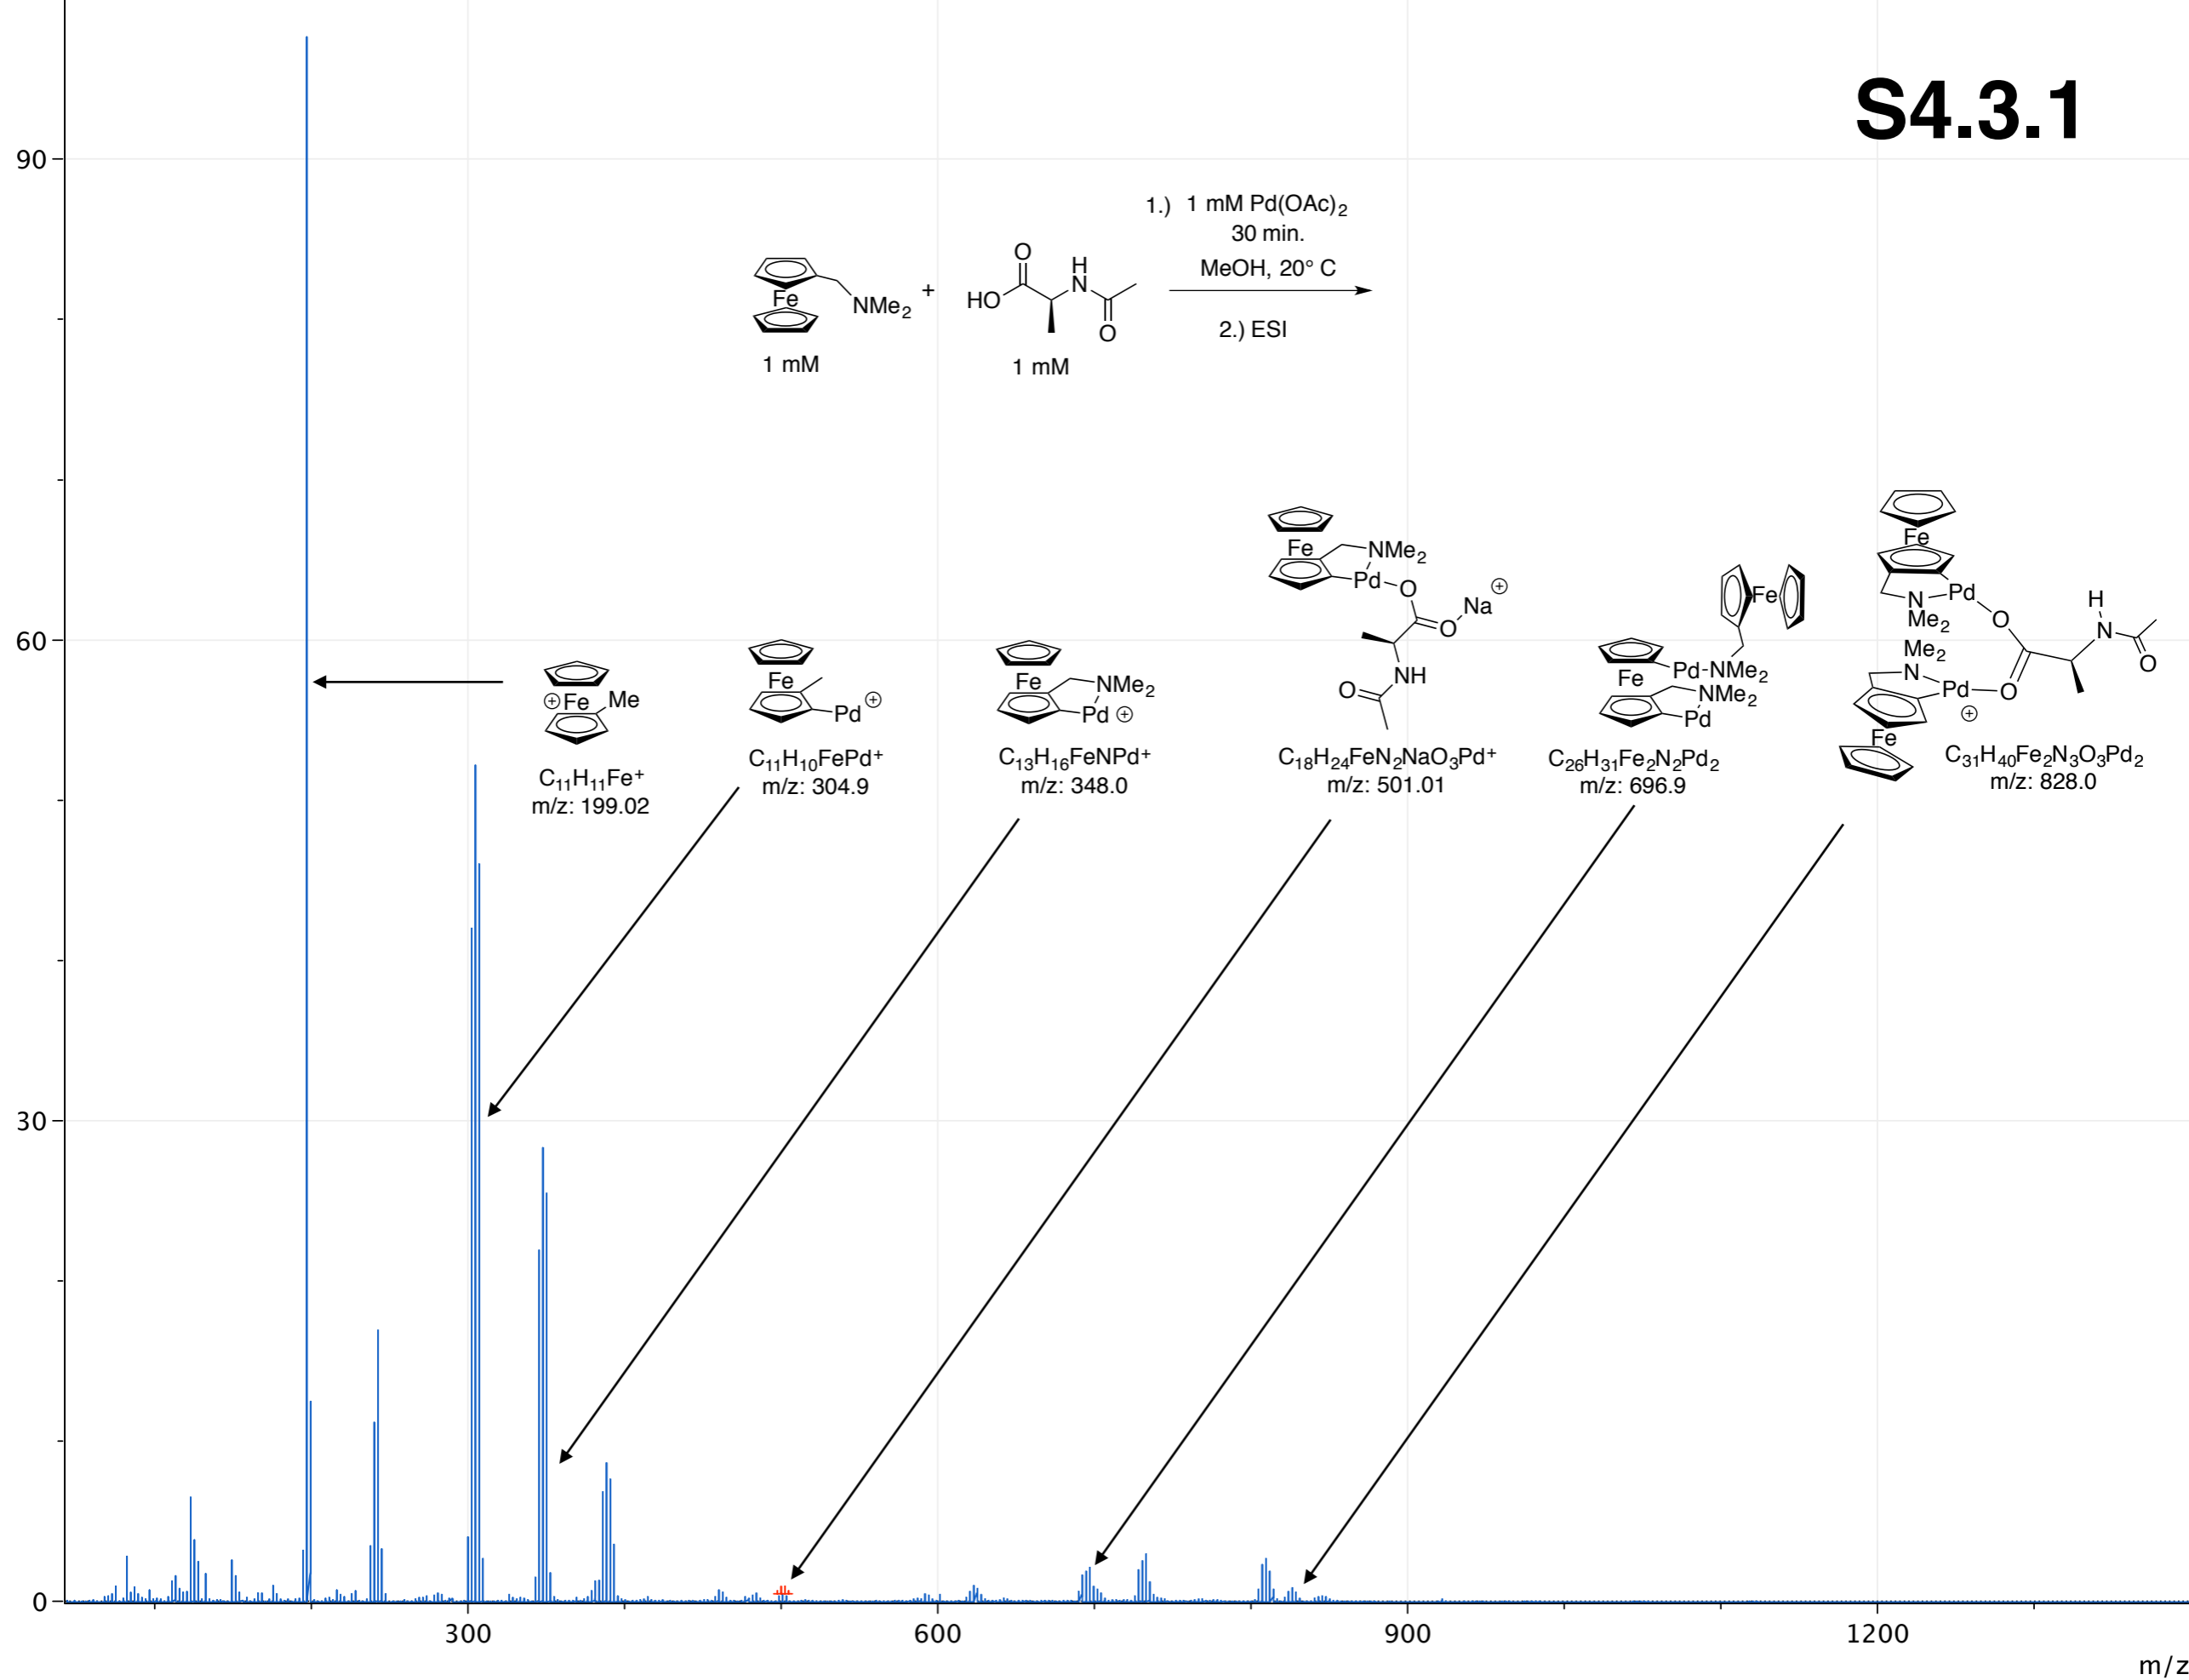

## S4.3.2

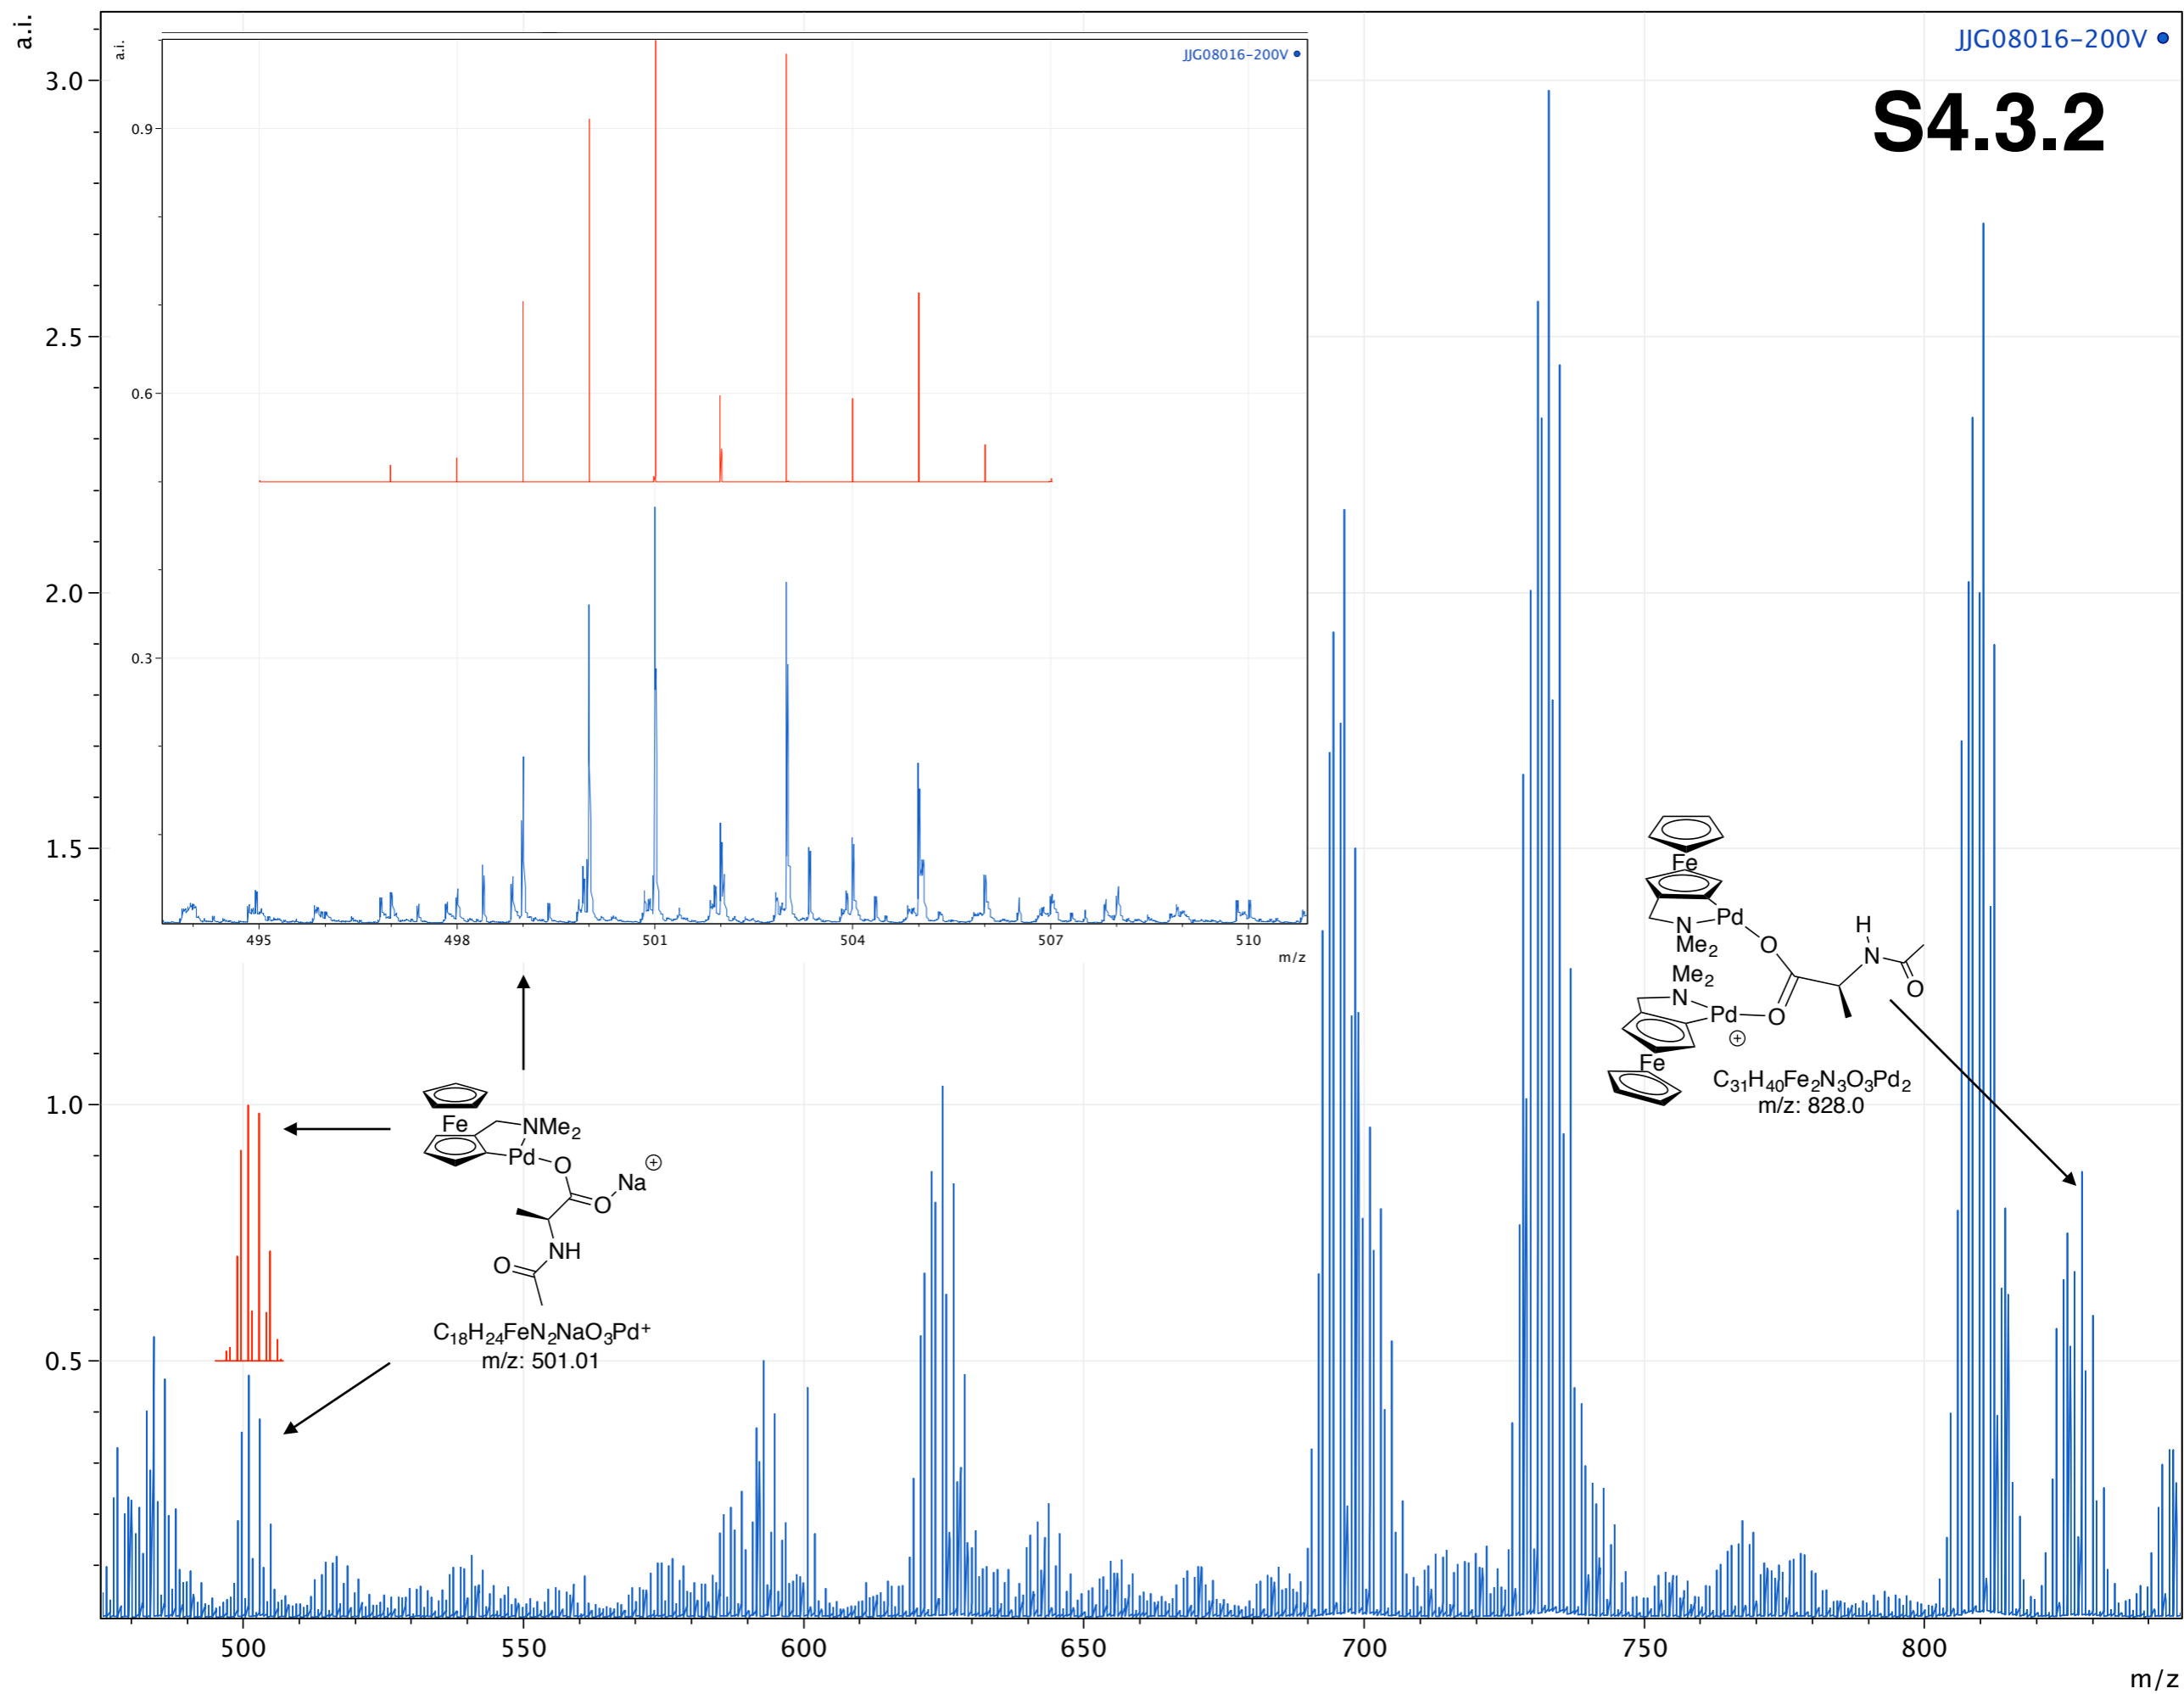

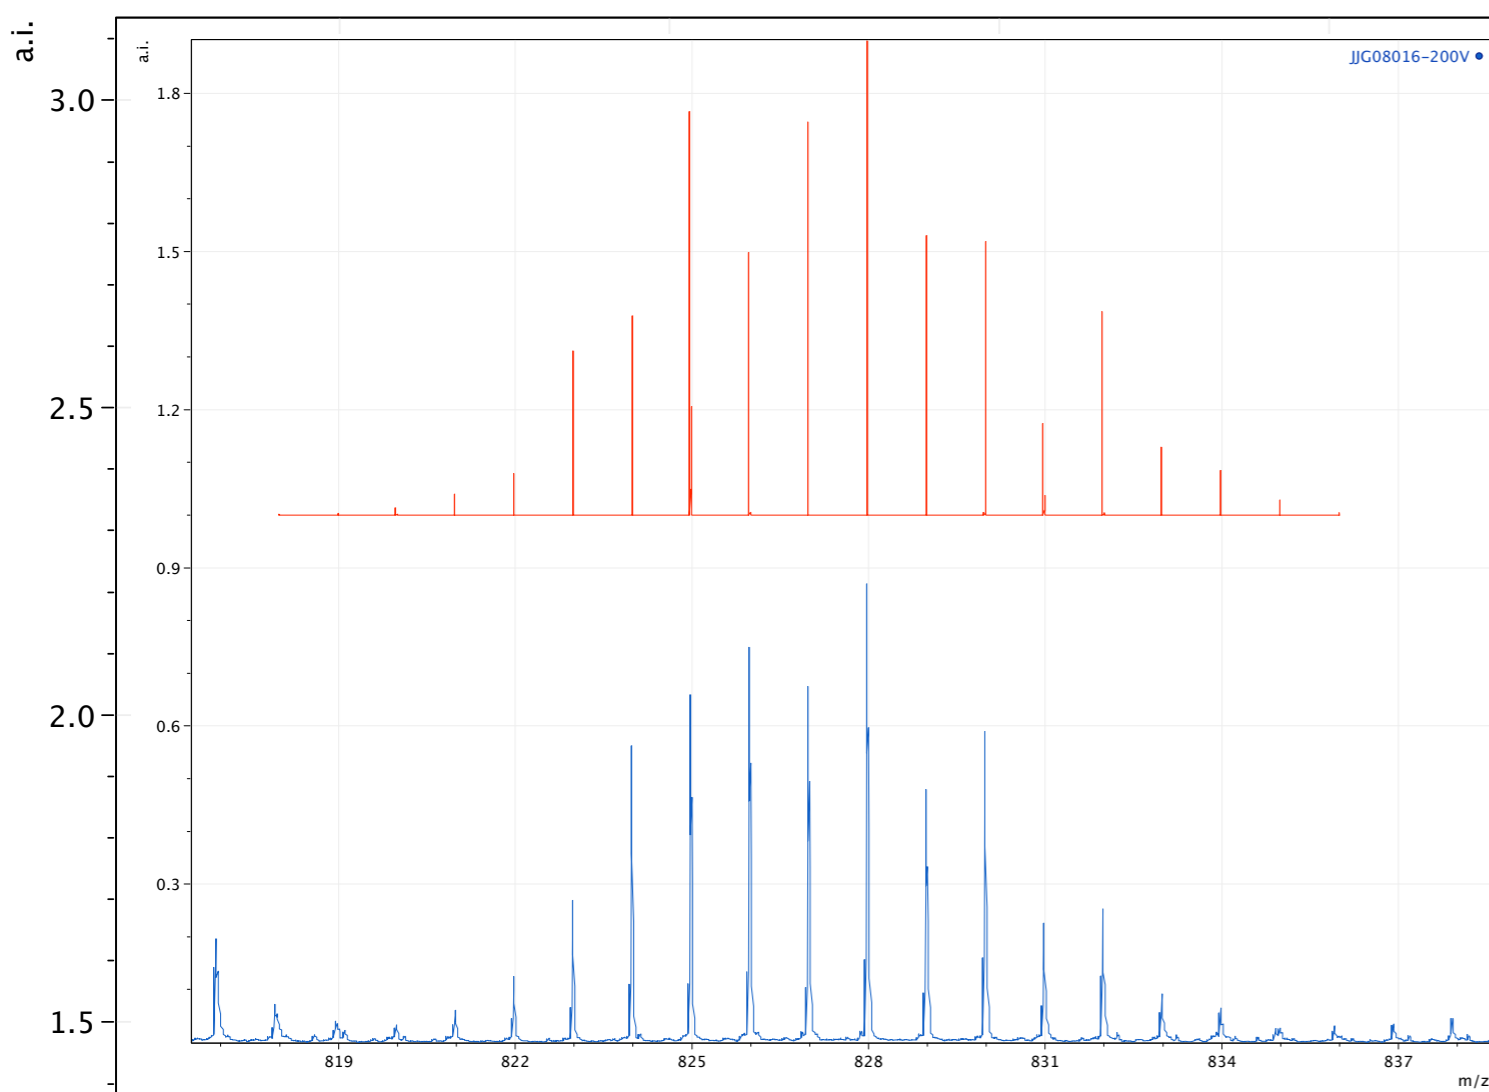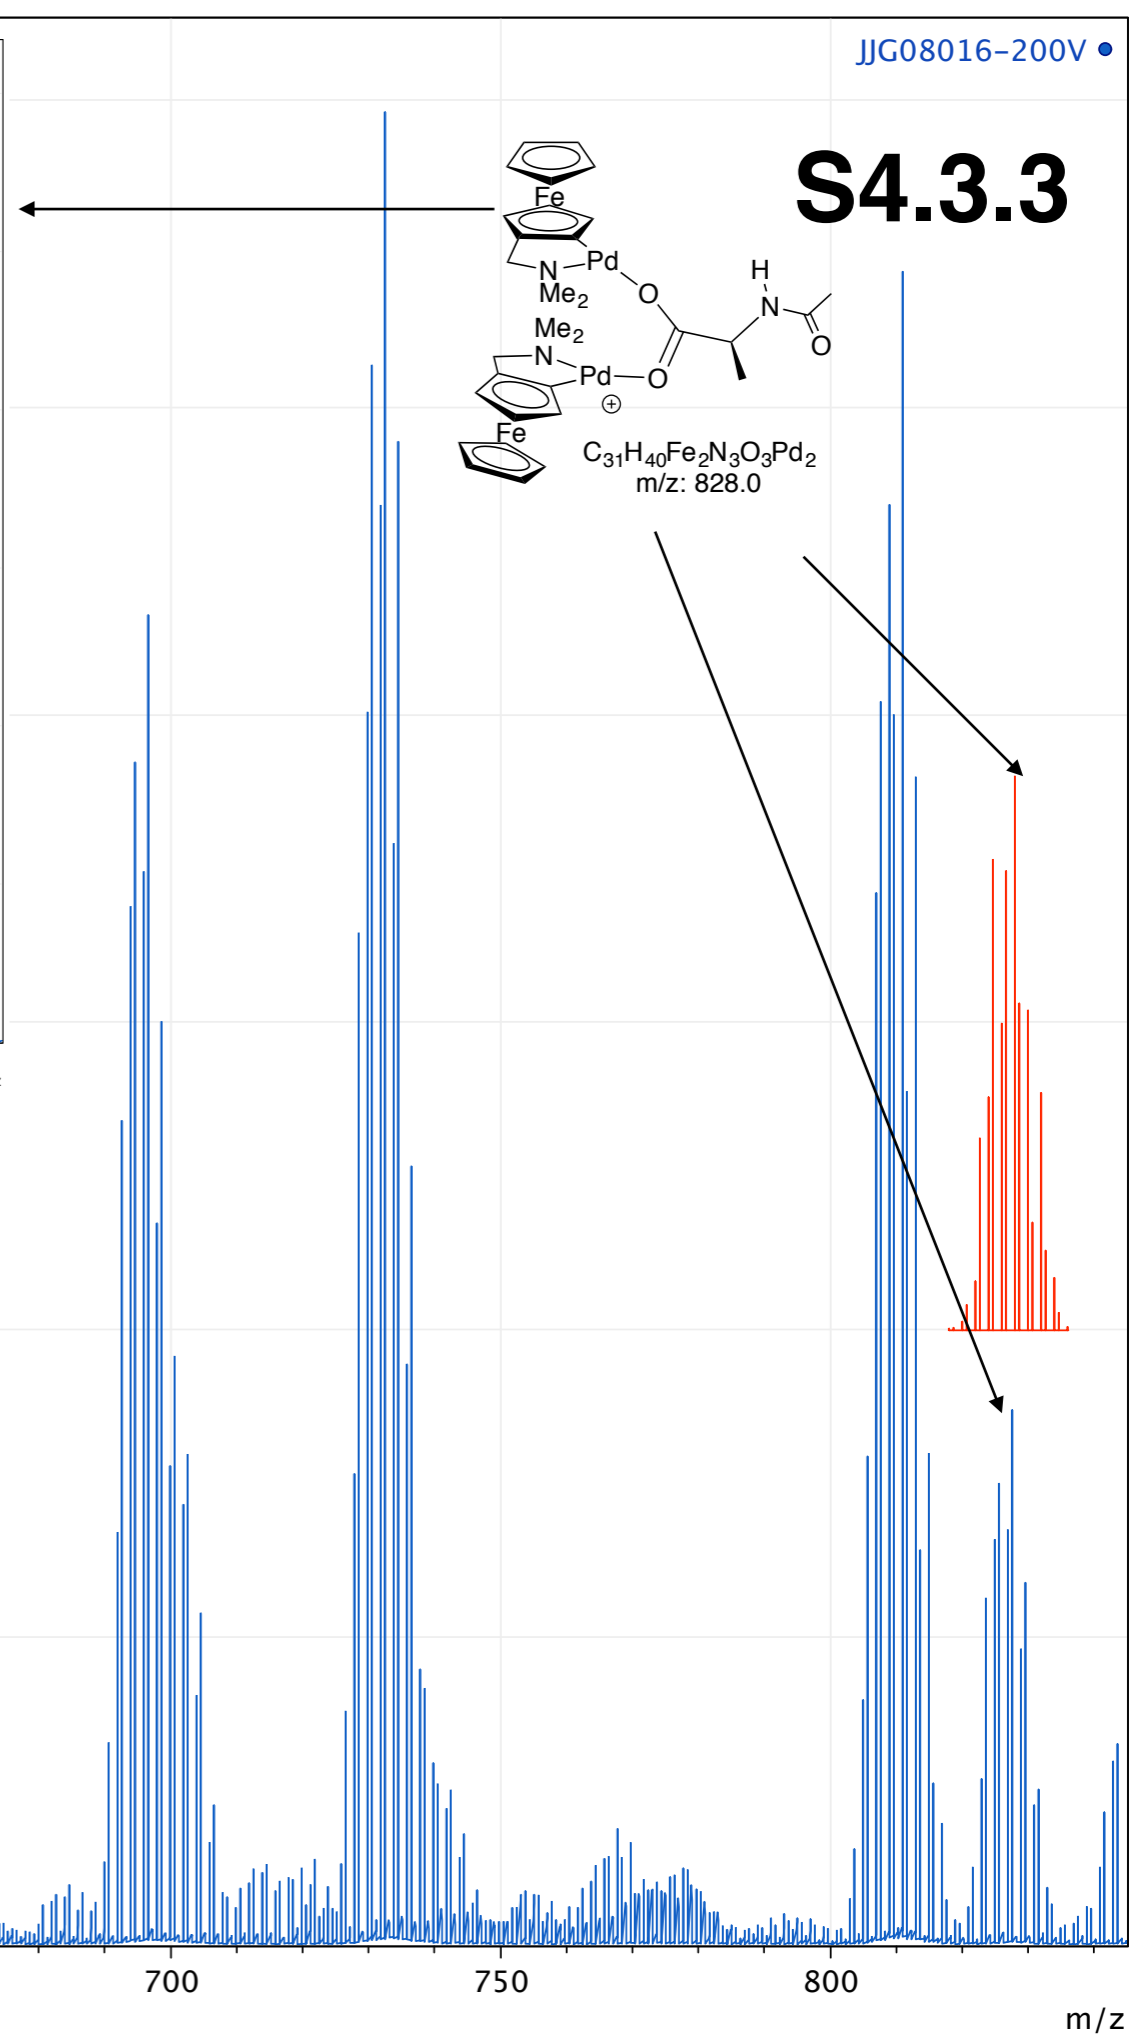

# S4.3.4

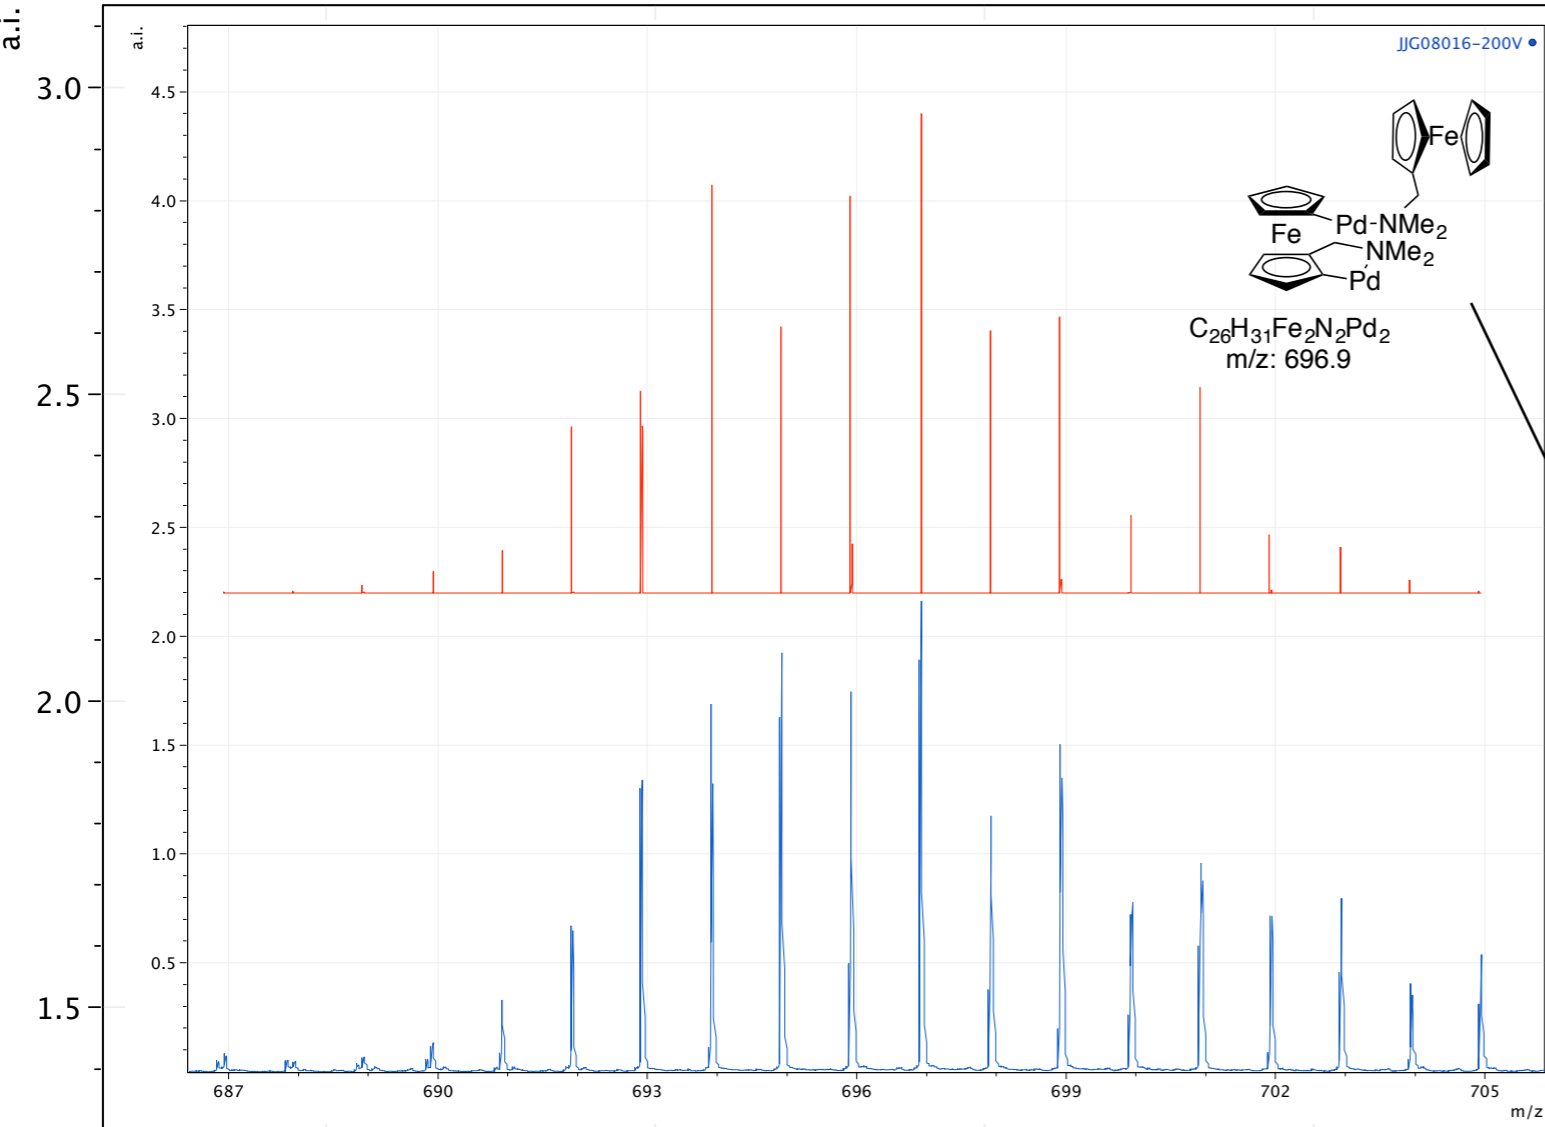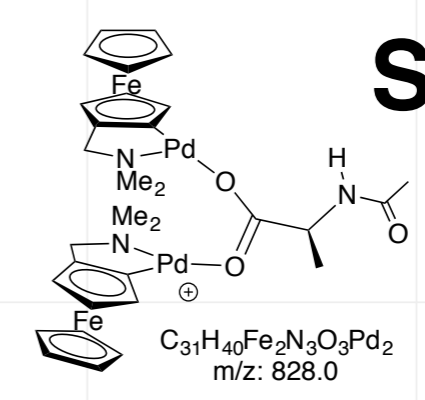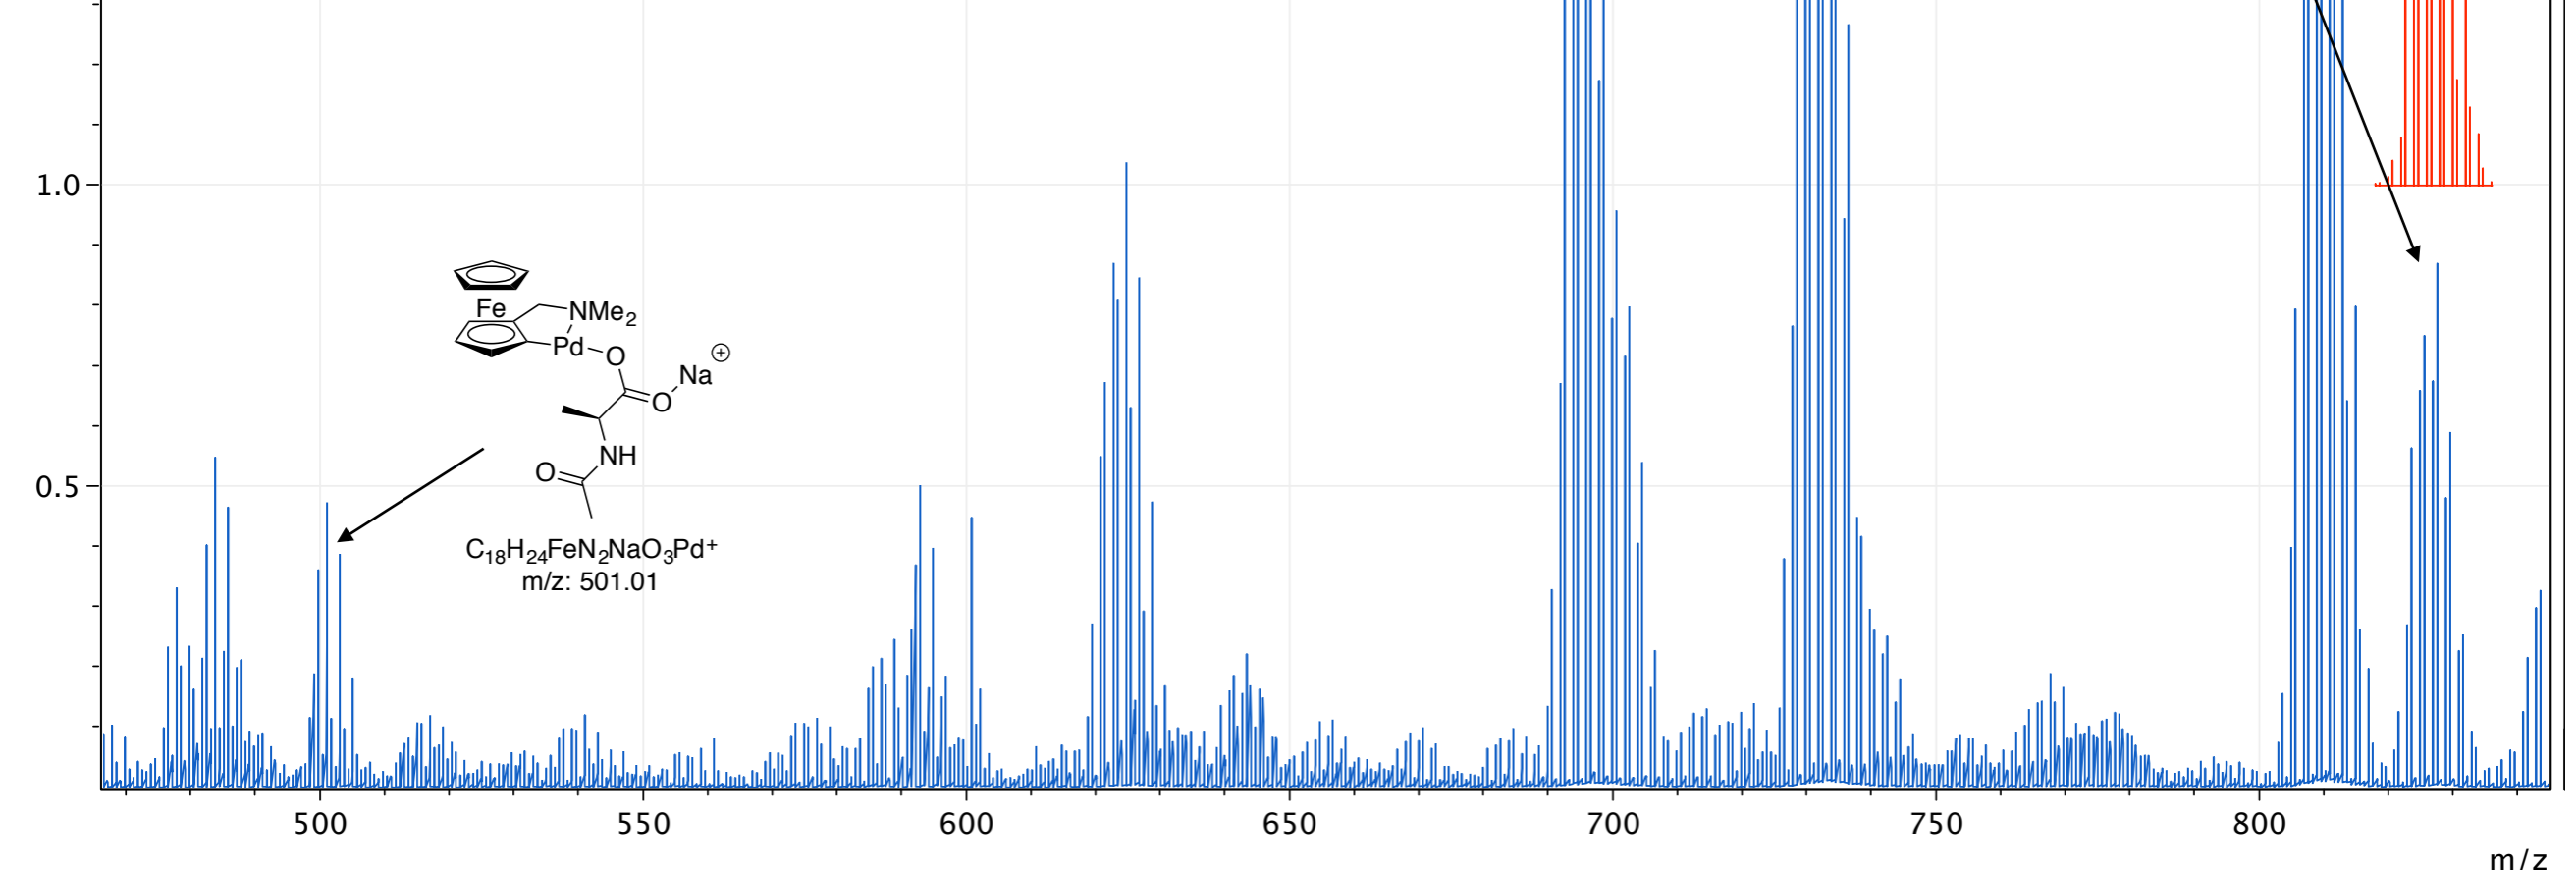

# S4.3.5

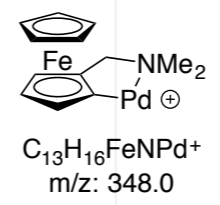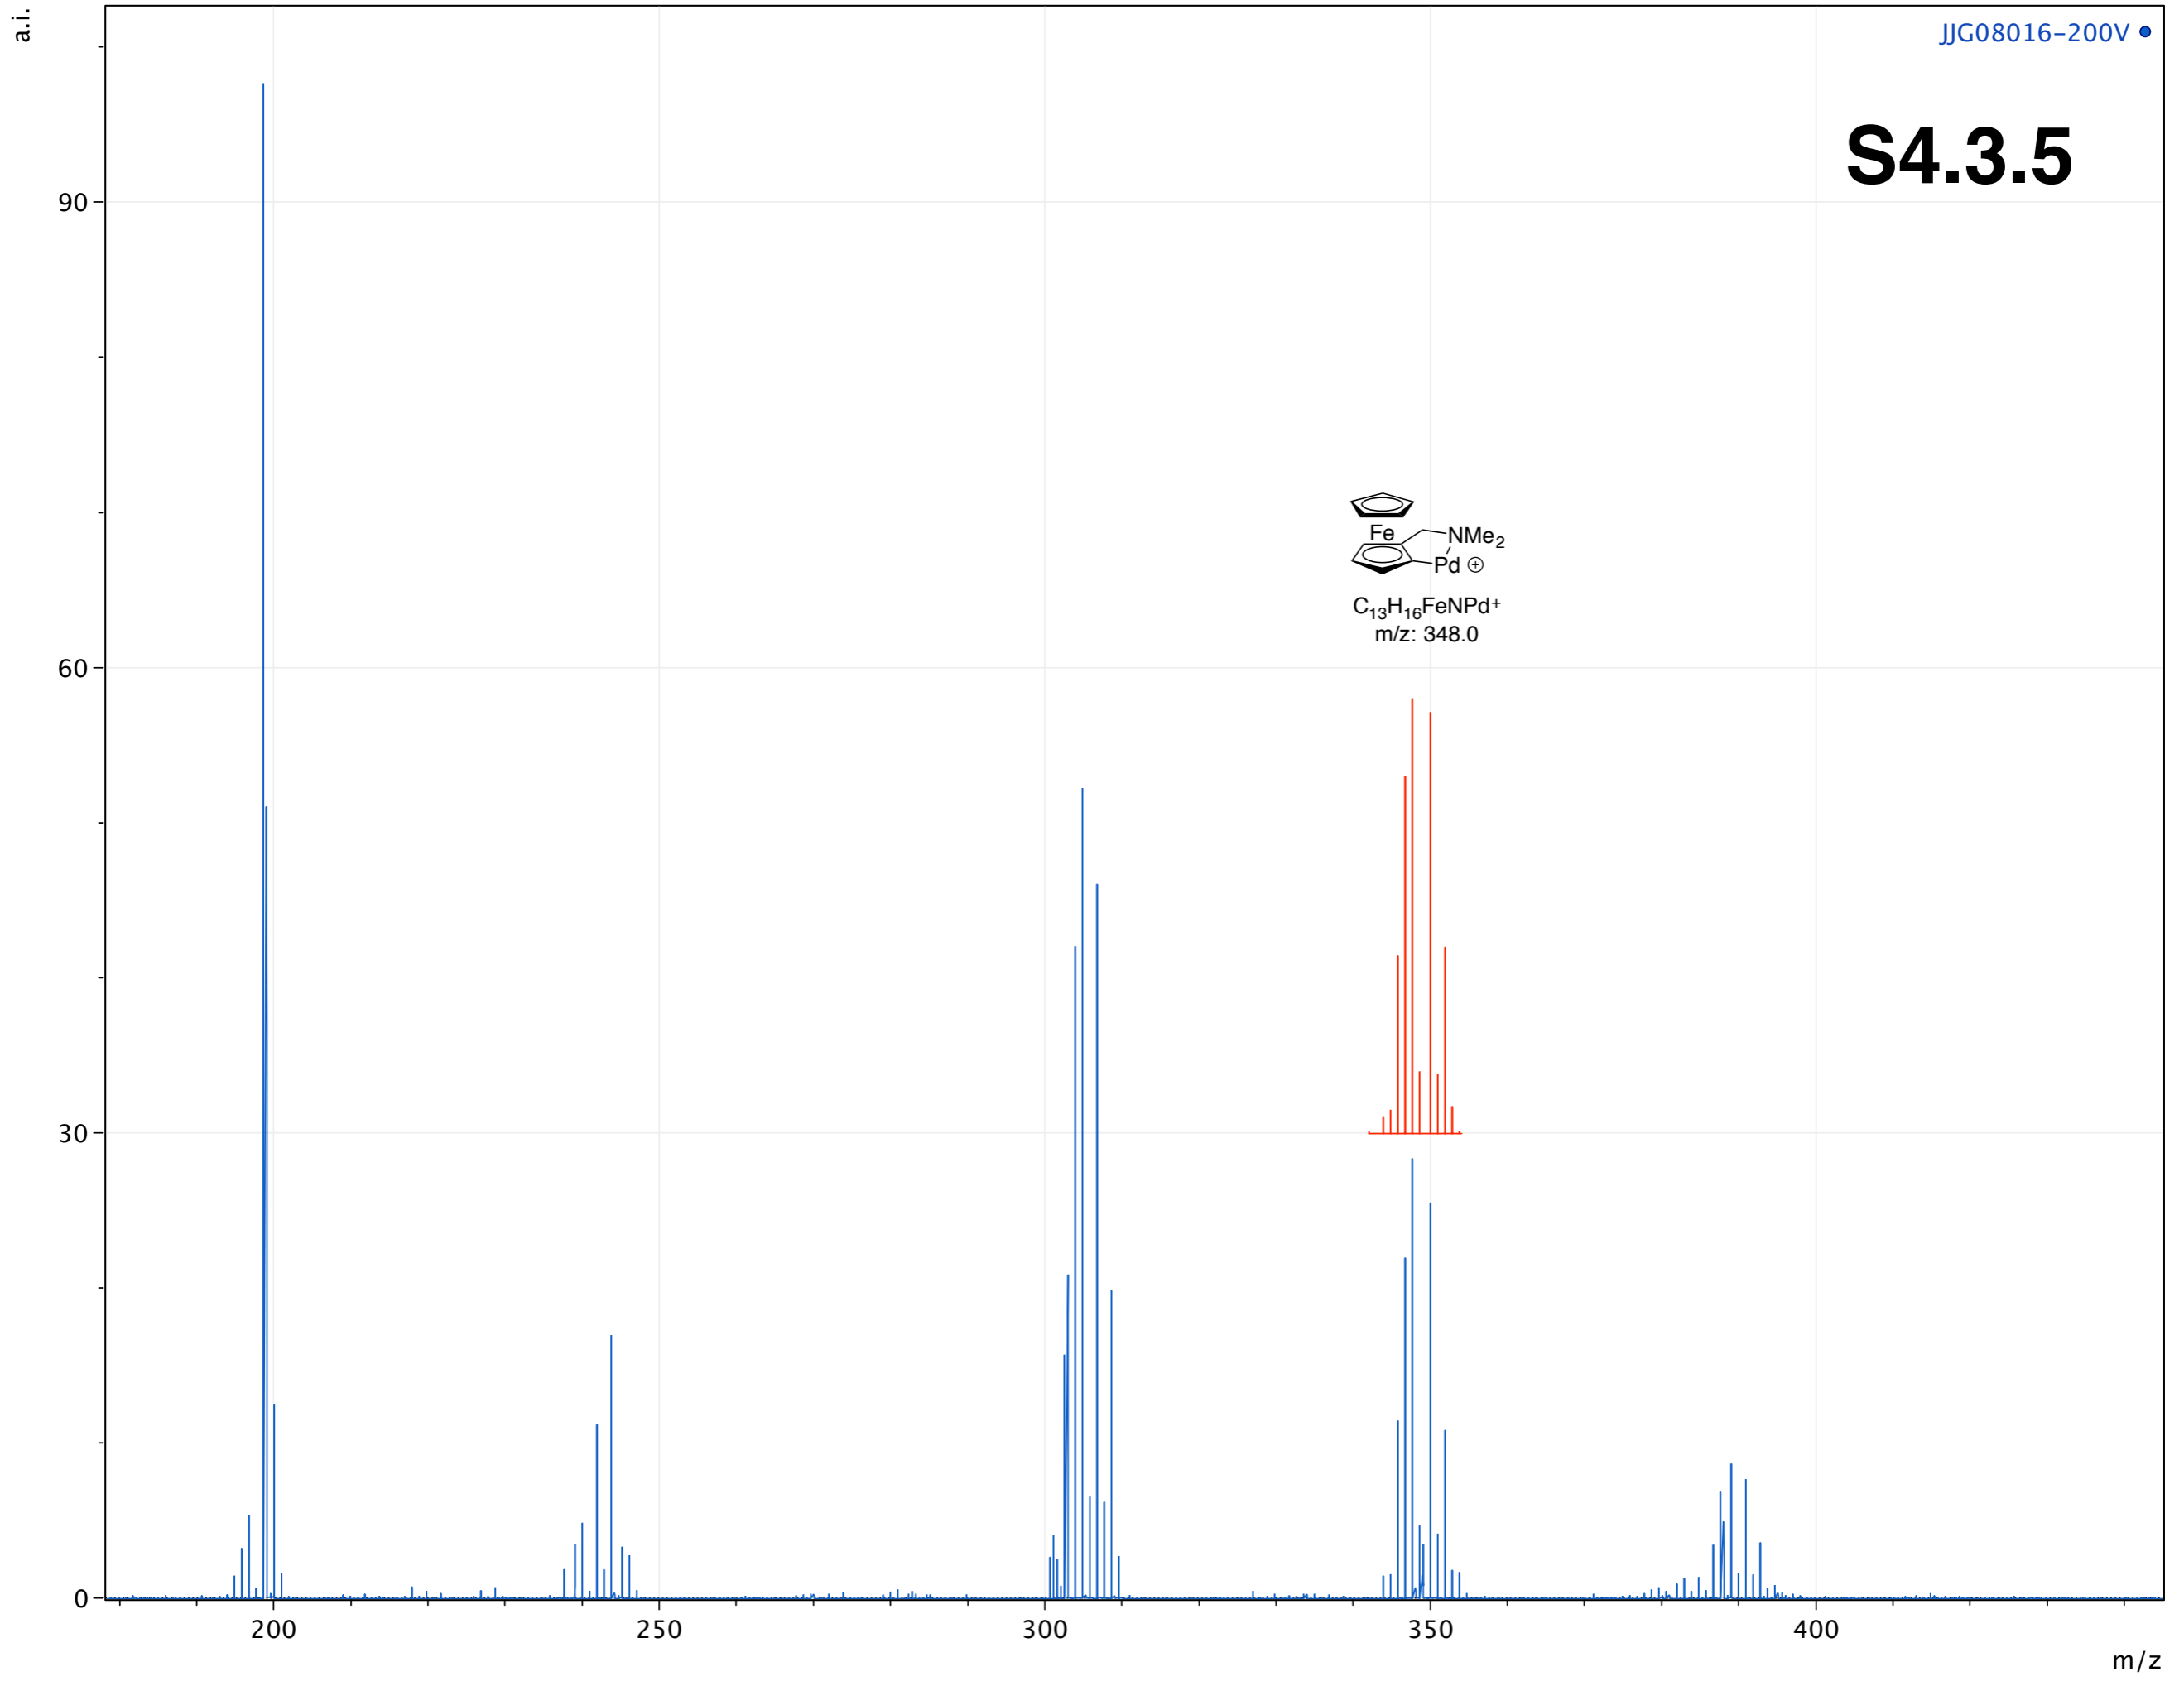

**S4.3.6**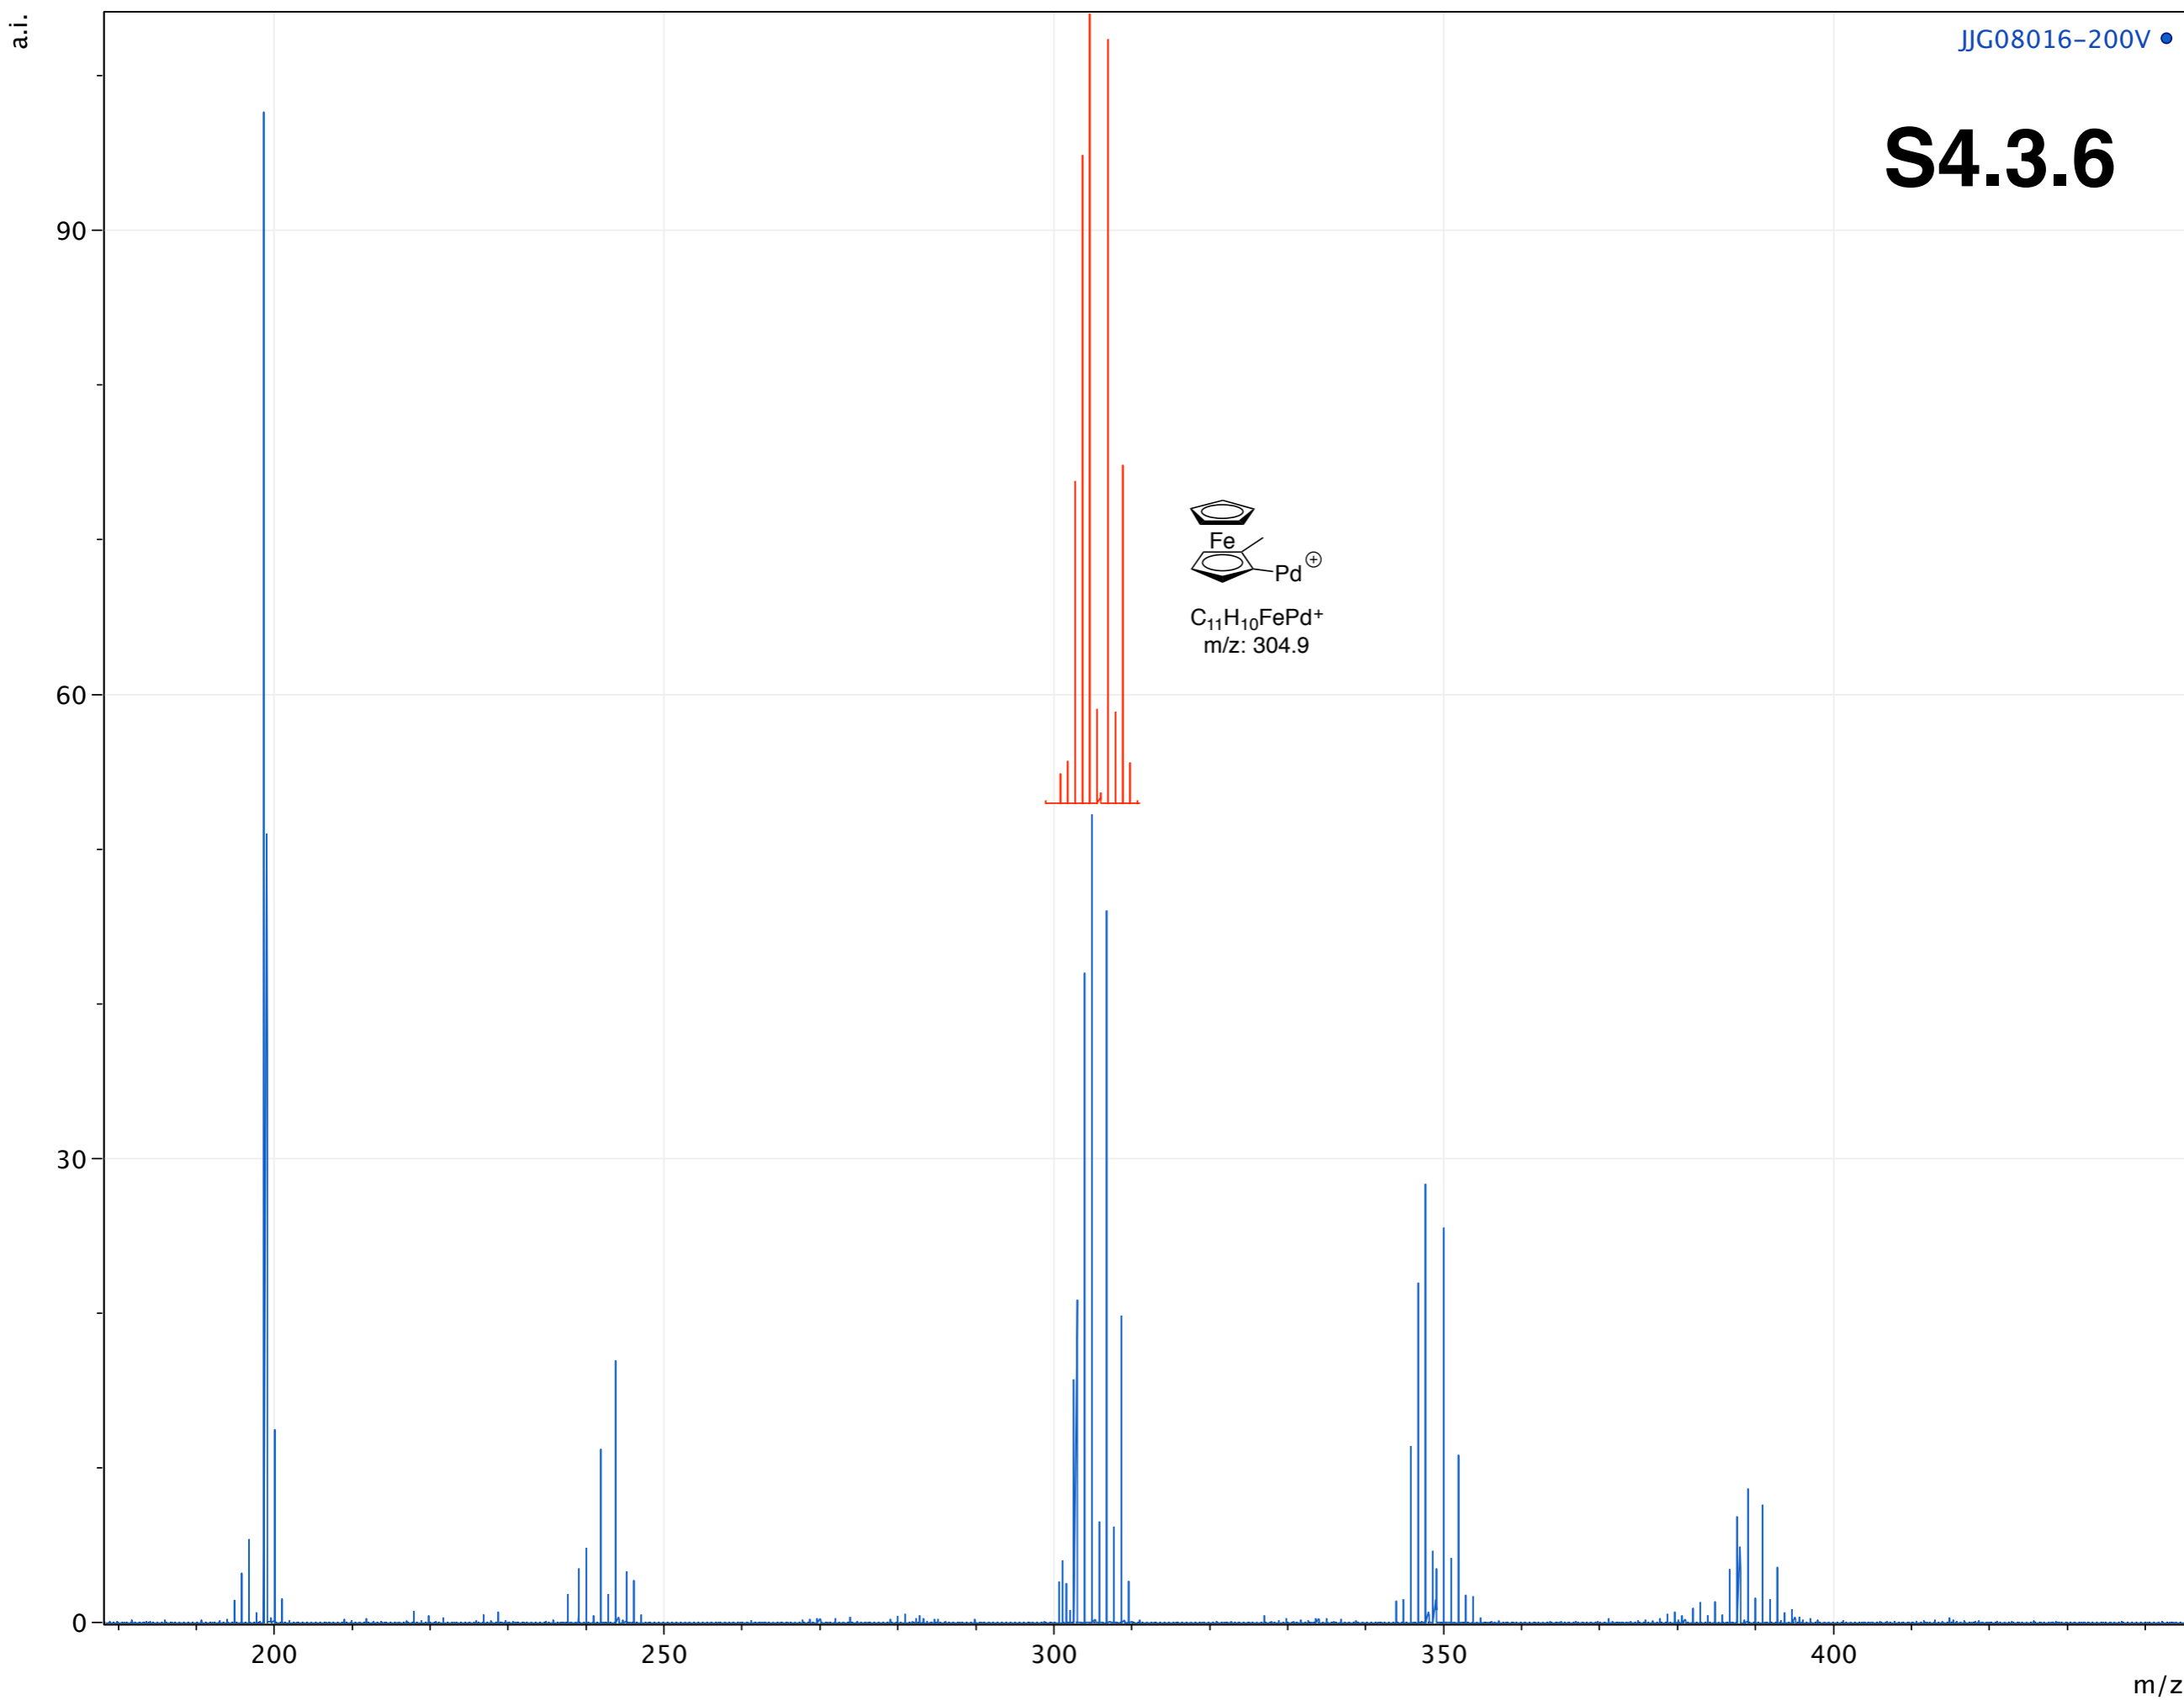

# S4.3.7

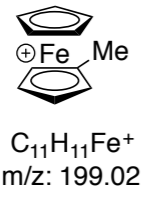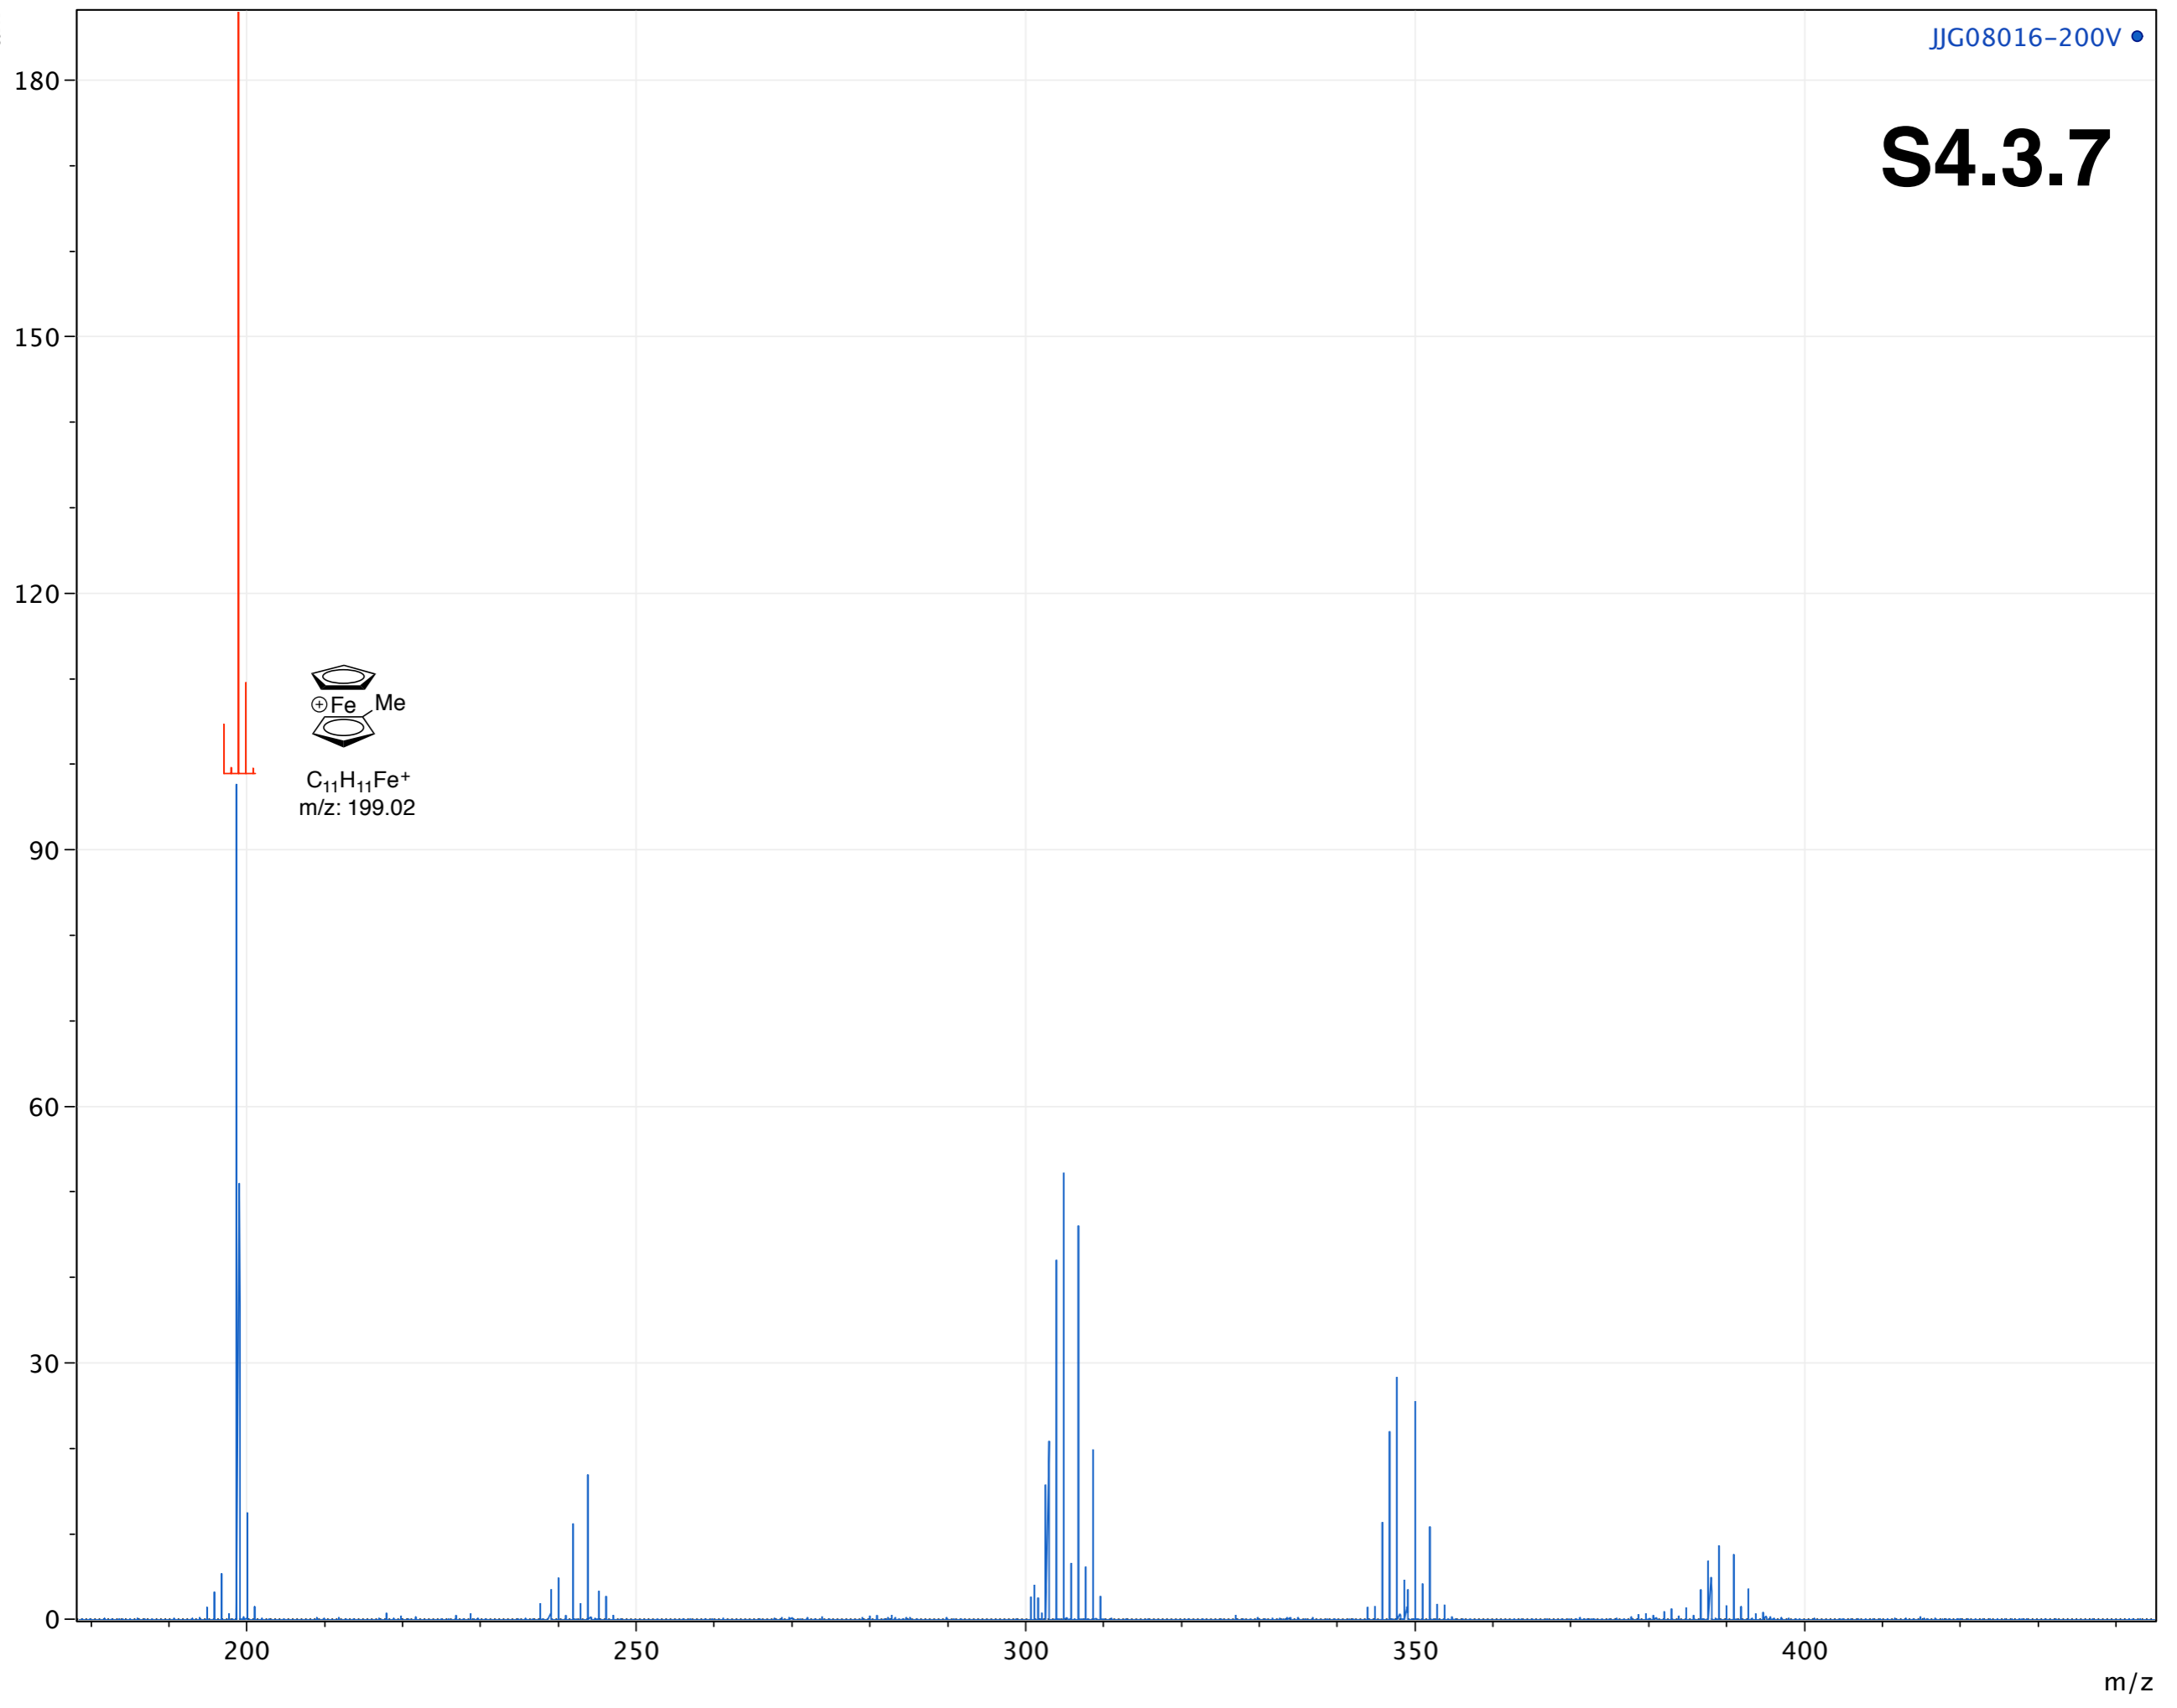

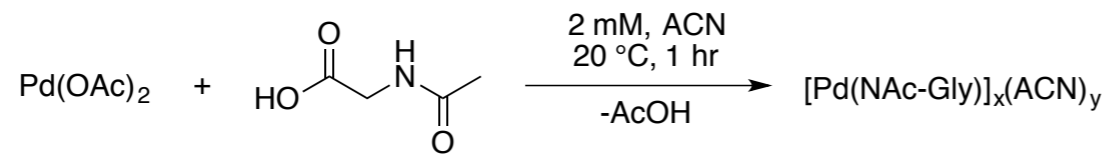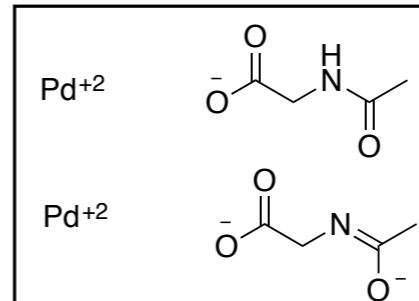

# S4.4.1

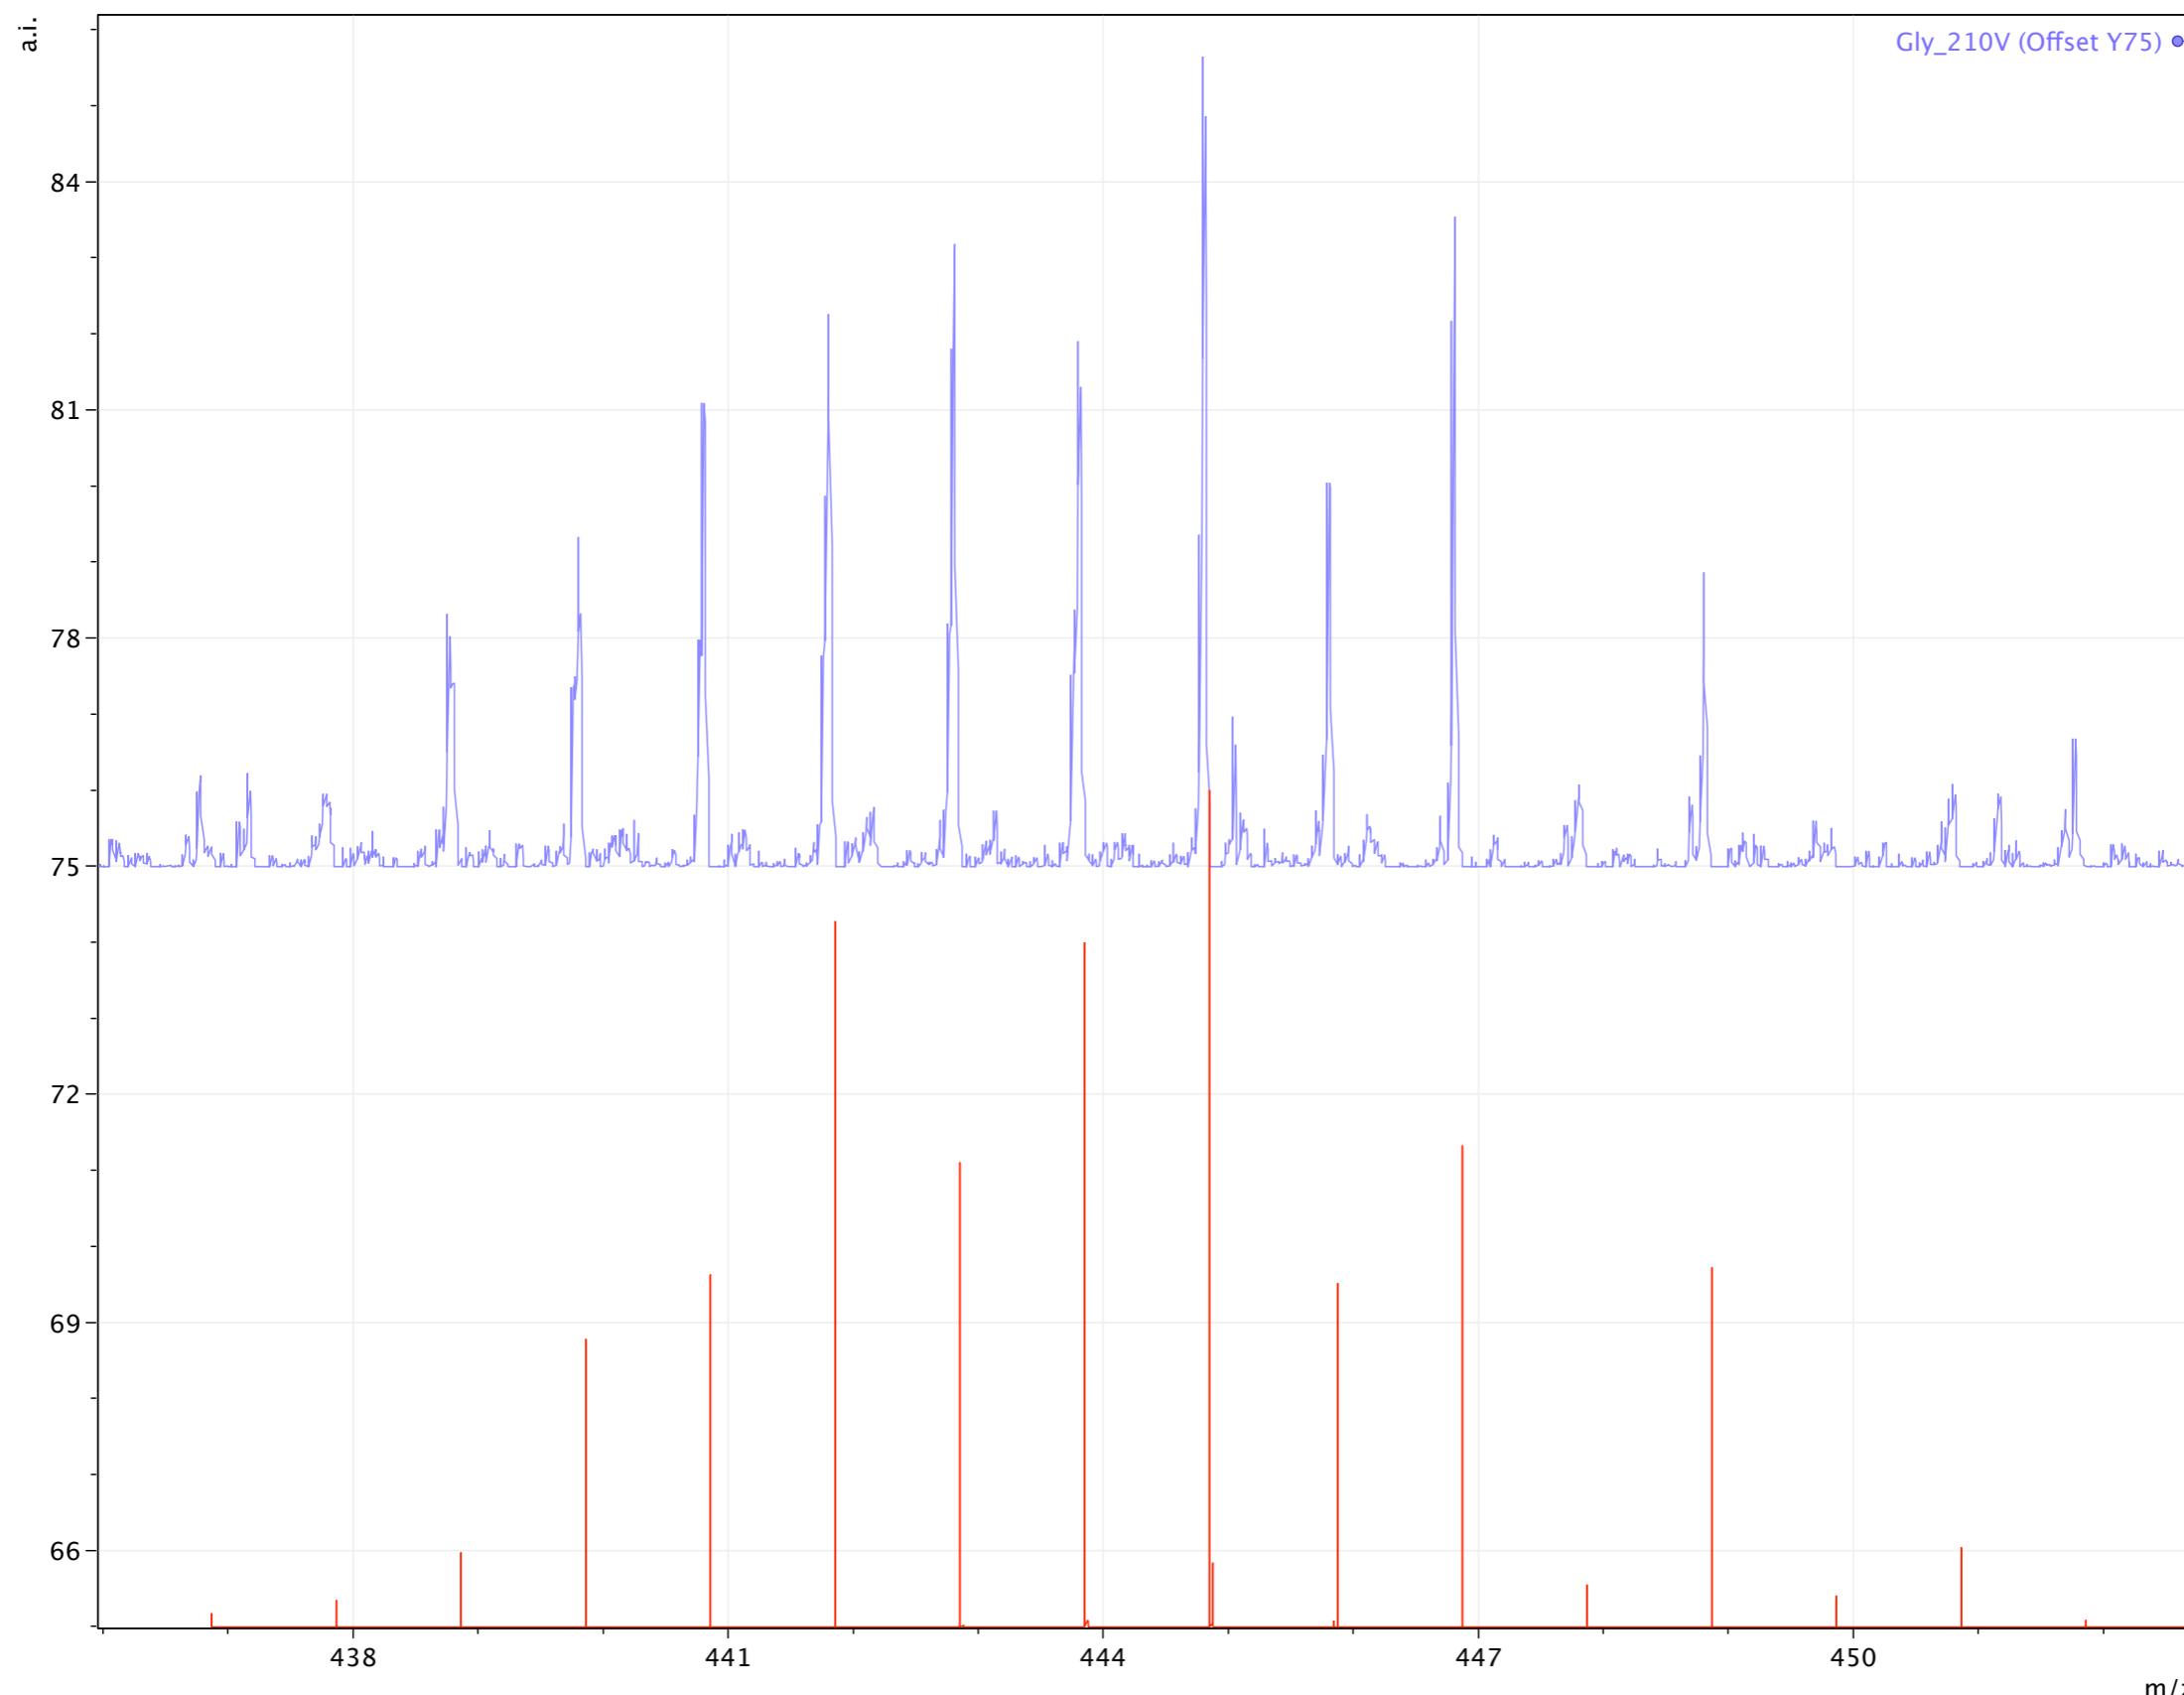



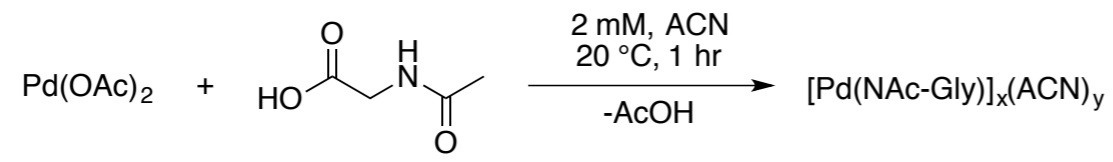

$\text{Pd}^{+2}$

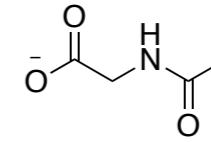

**S4.4.2**

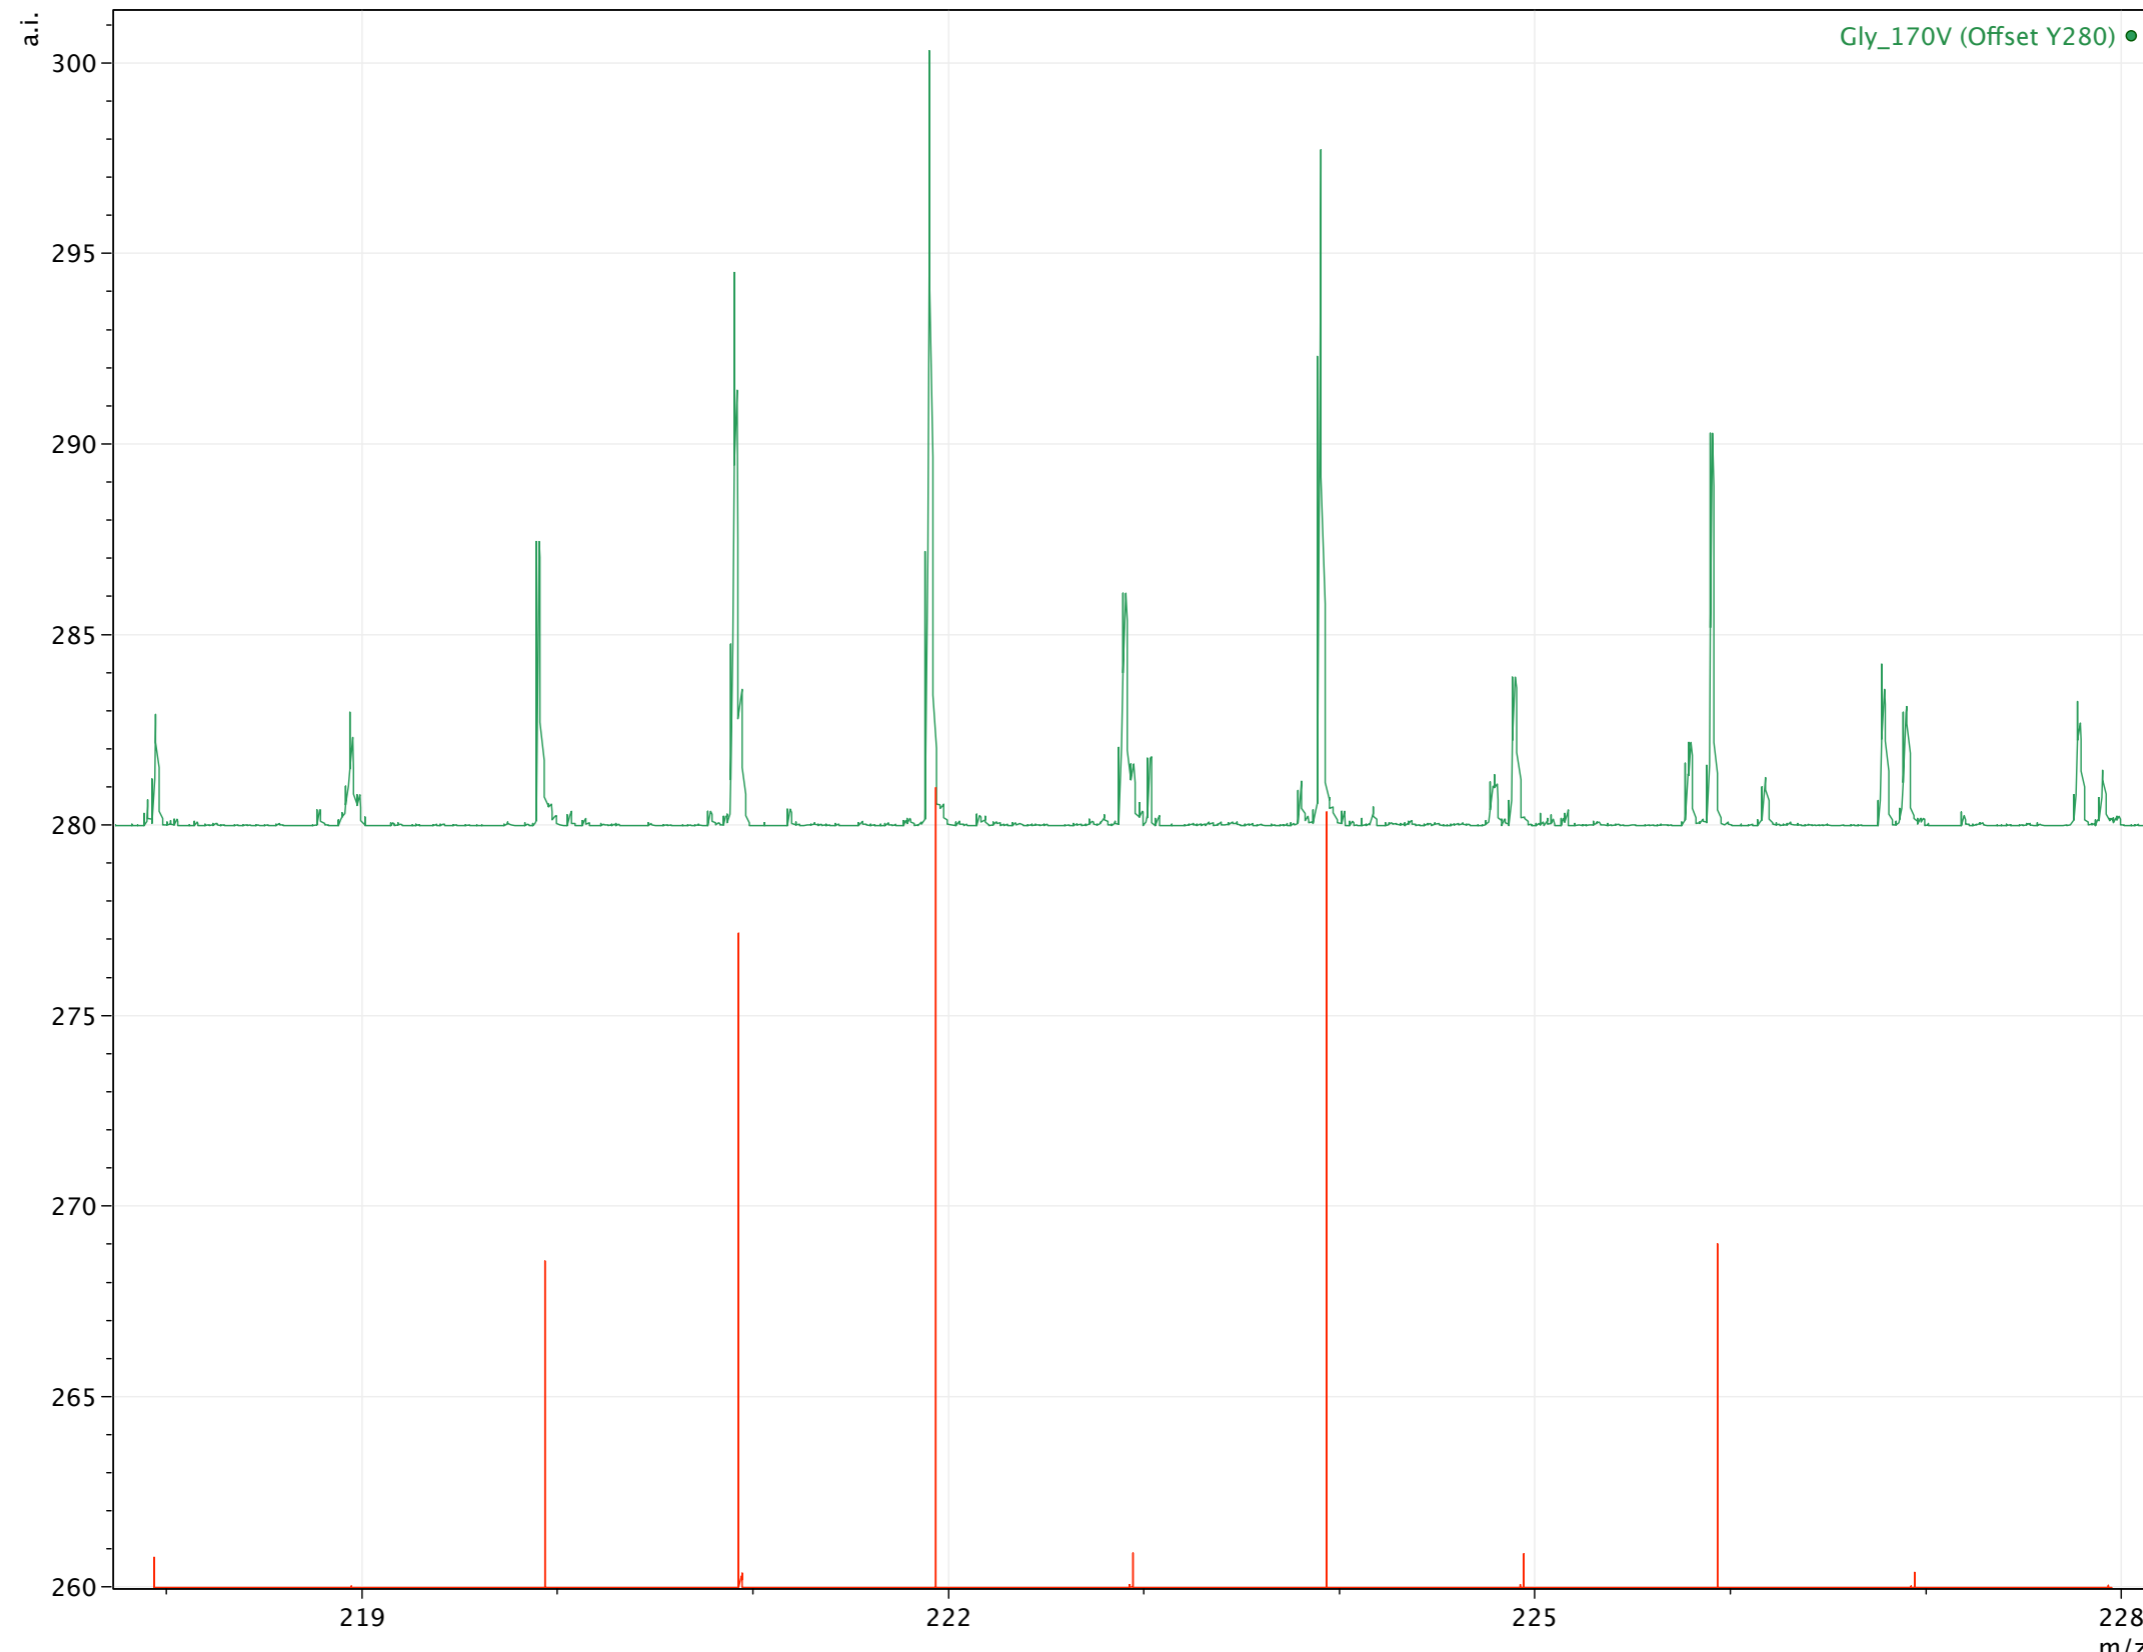

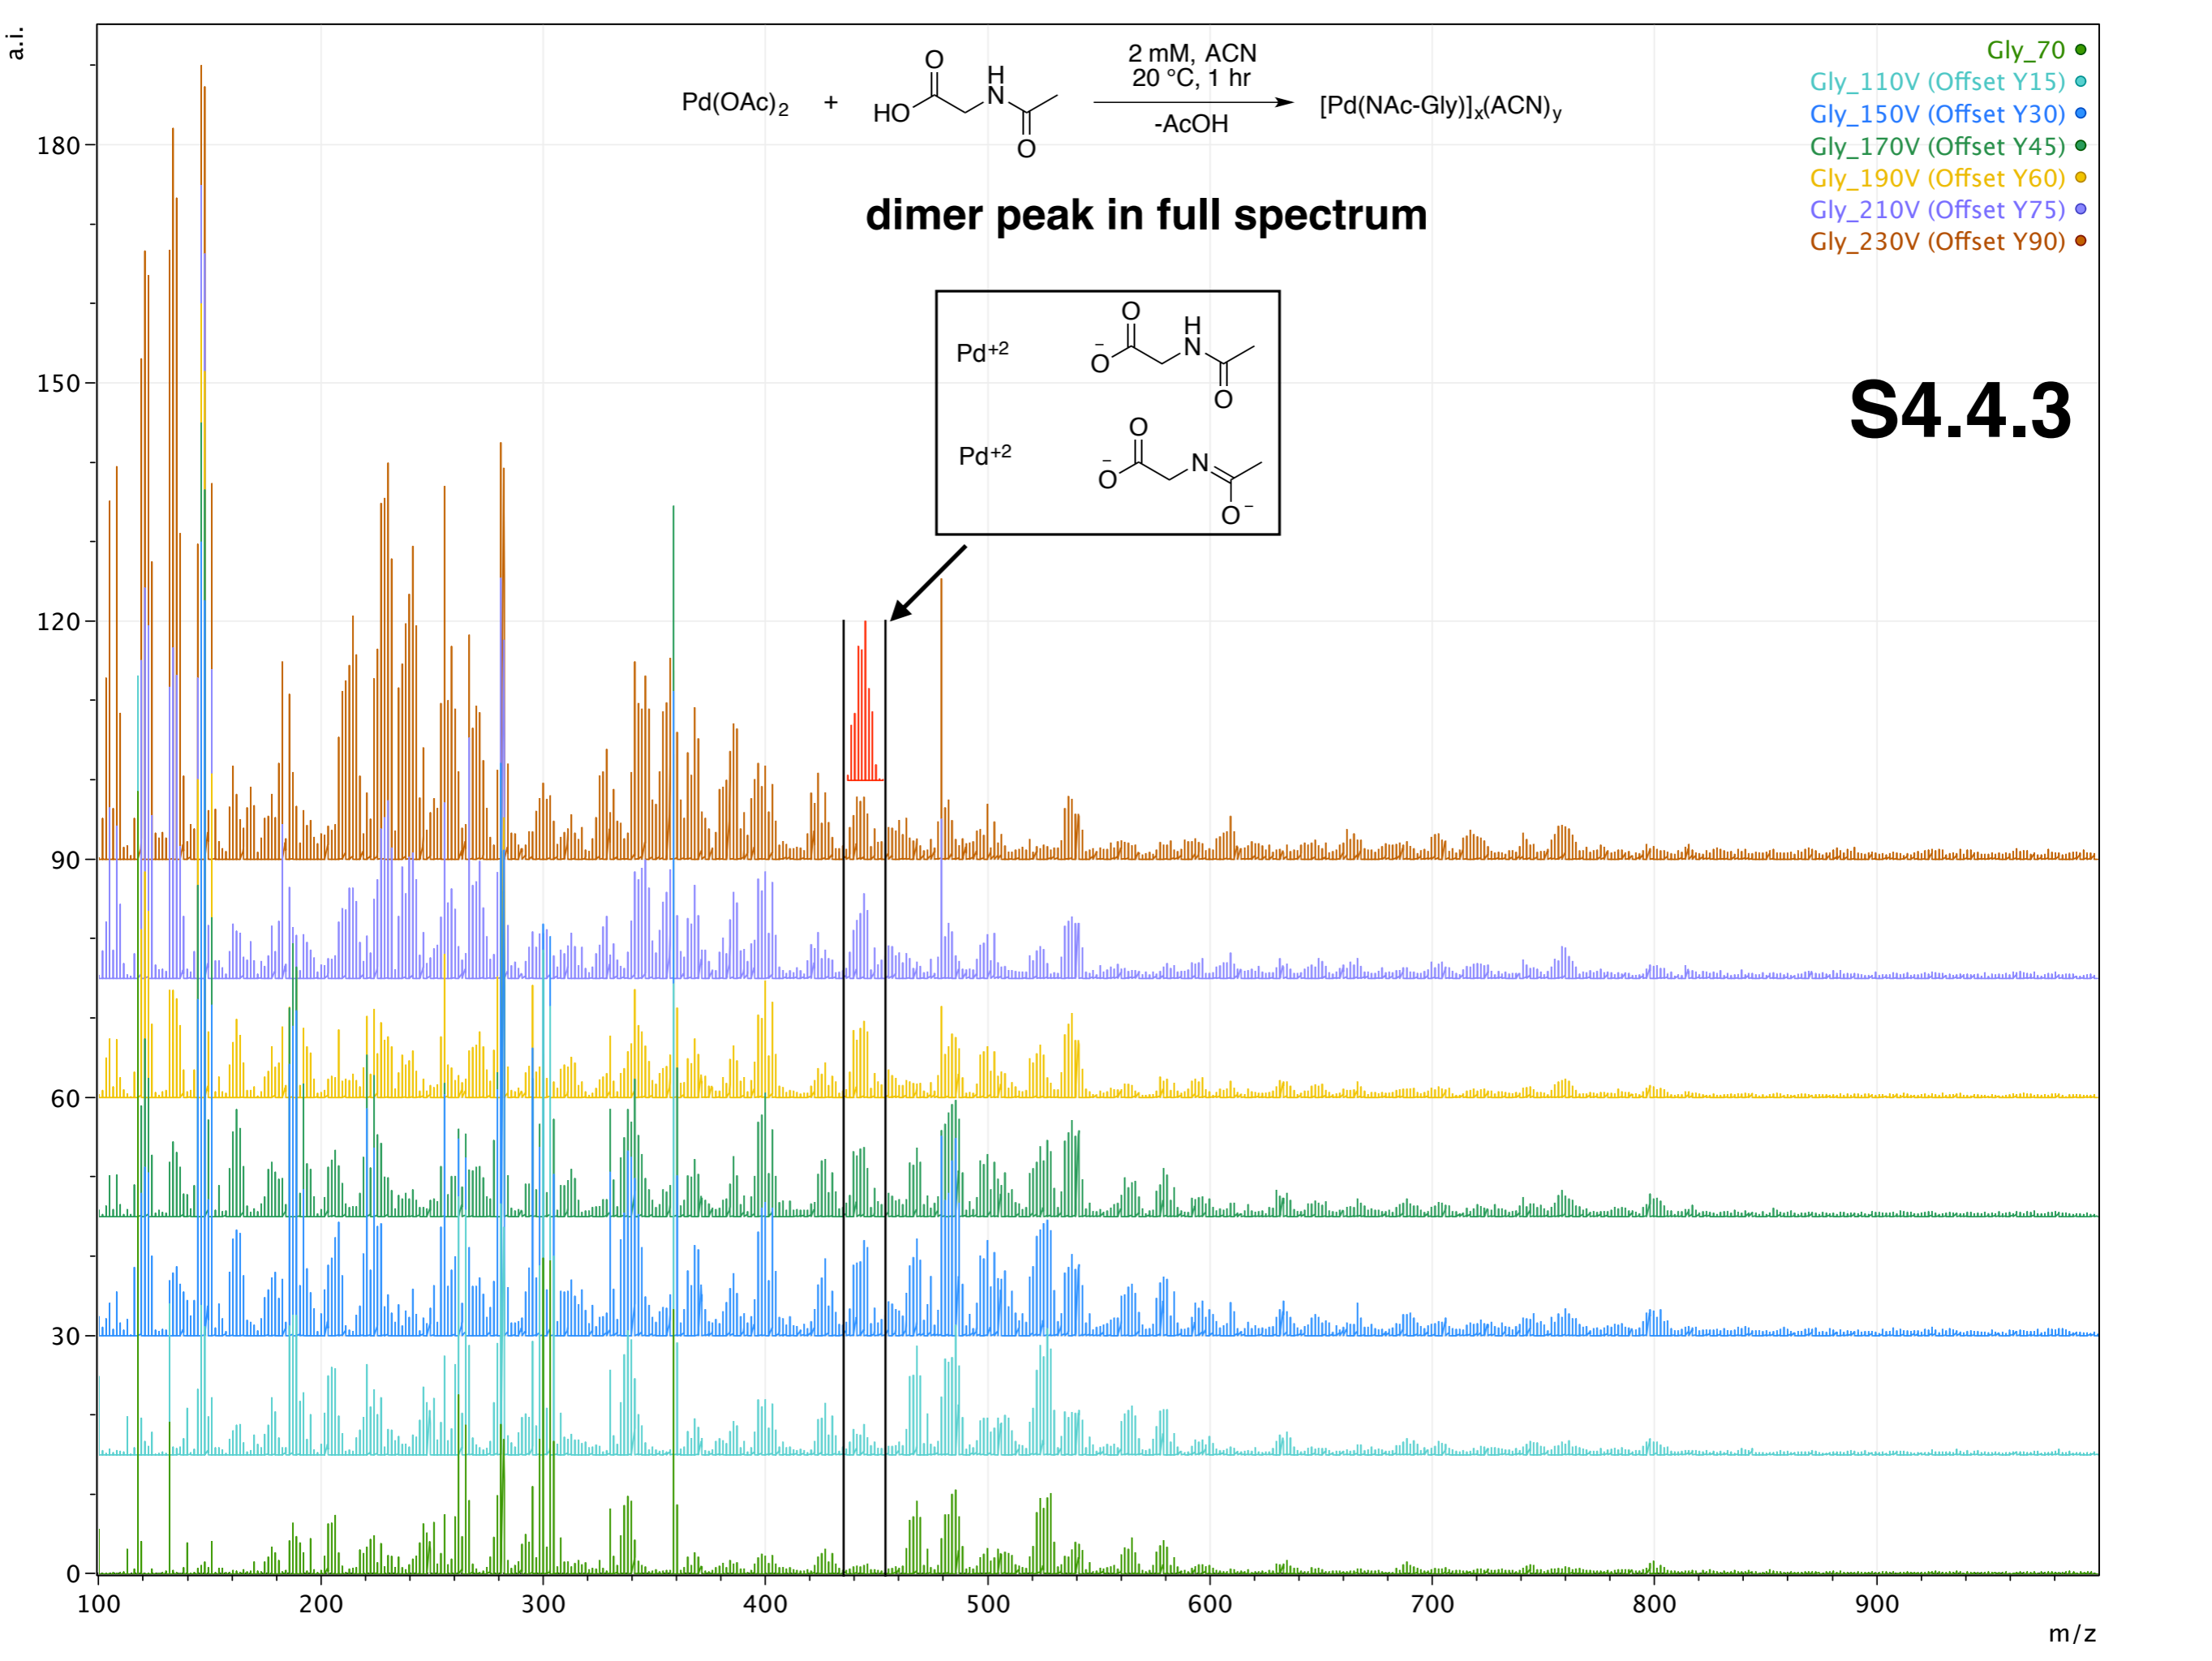

a.i

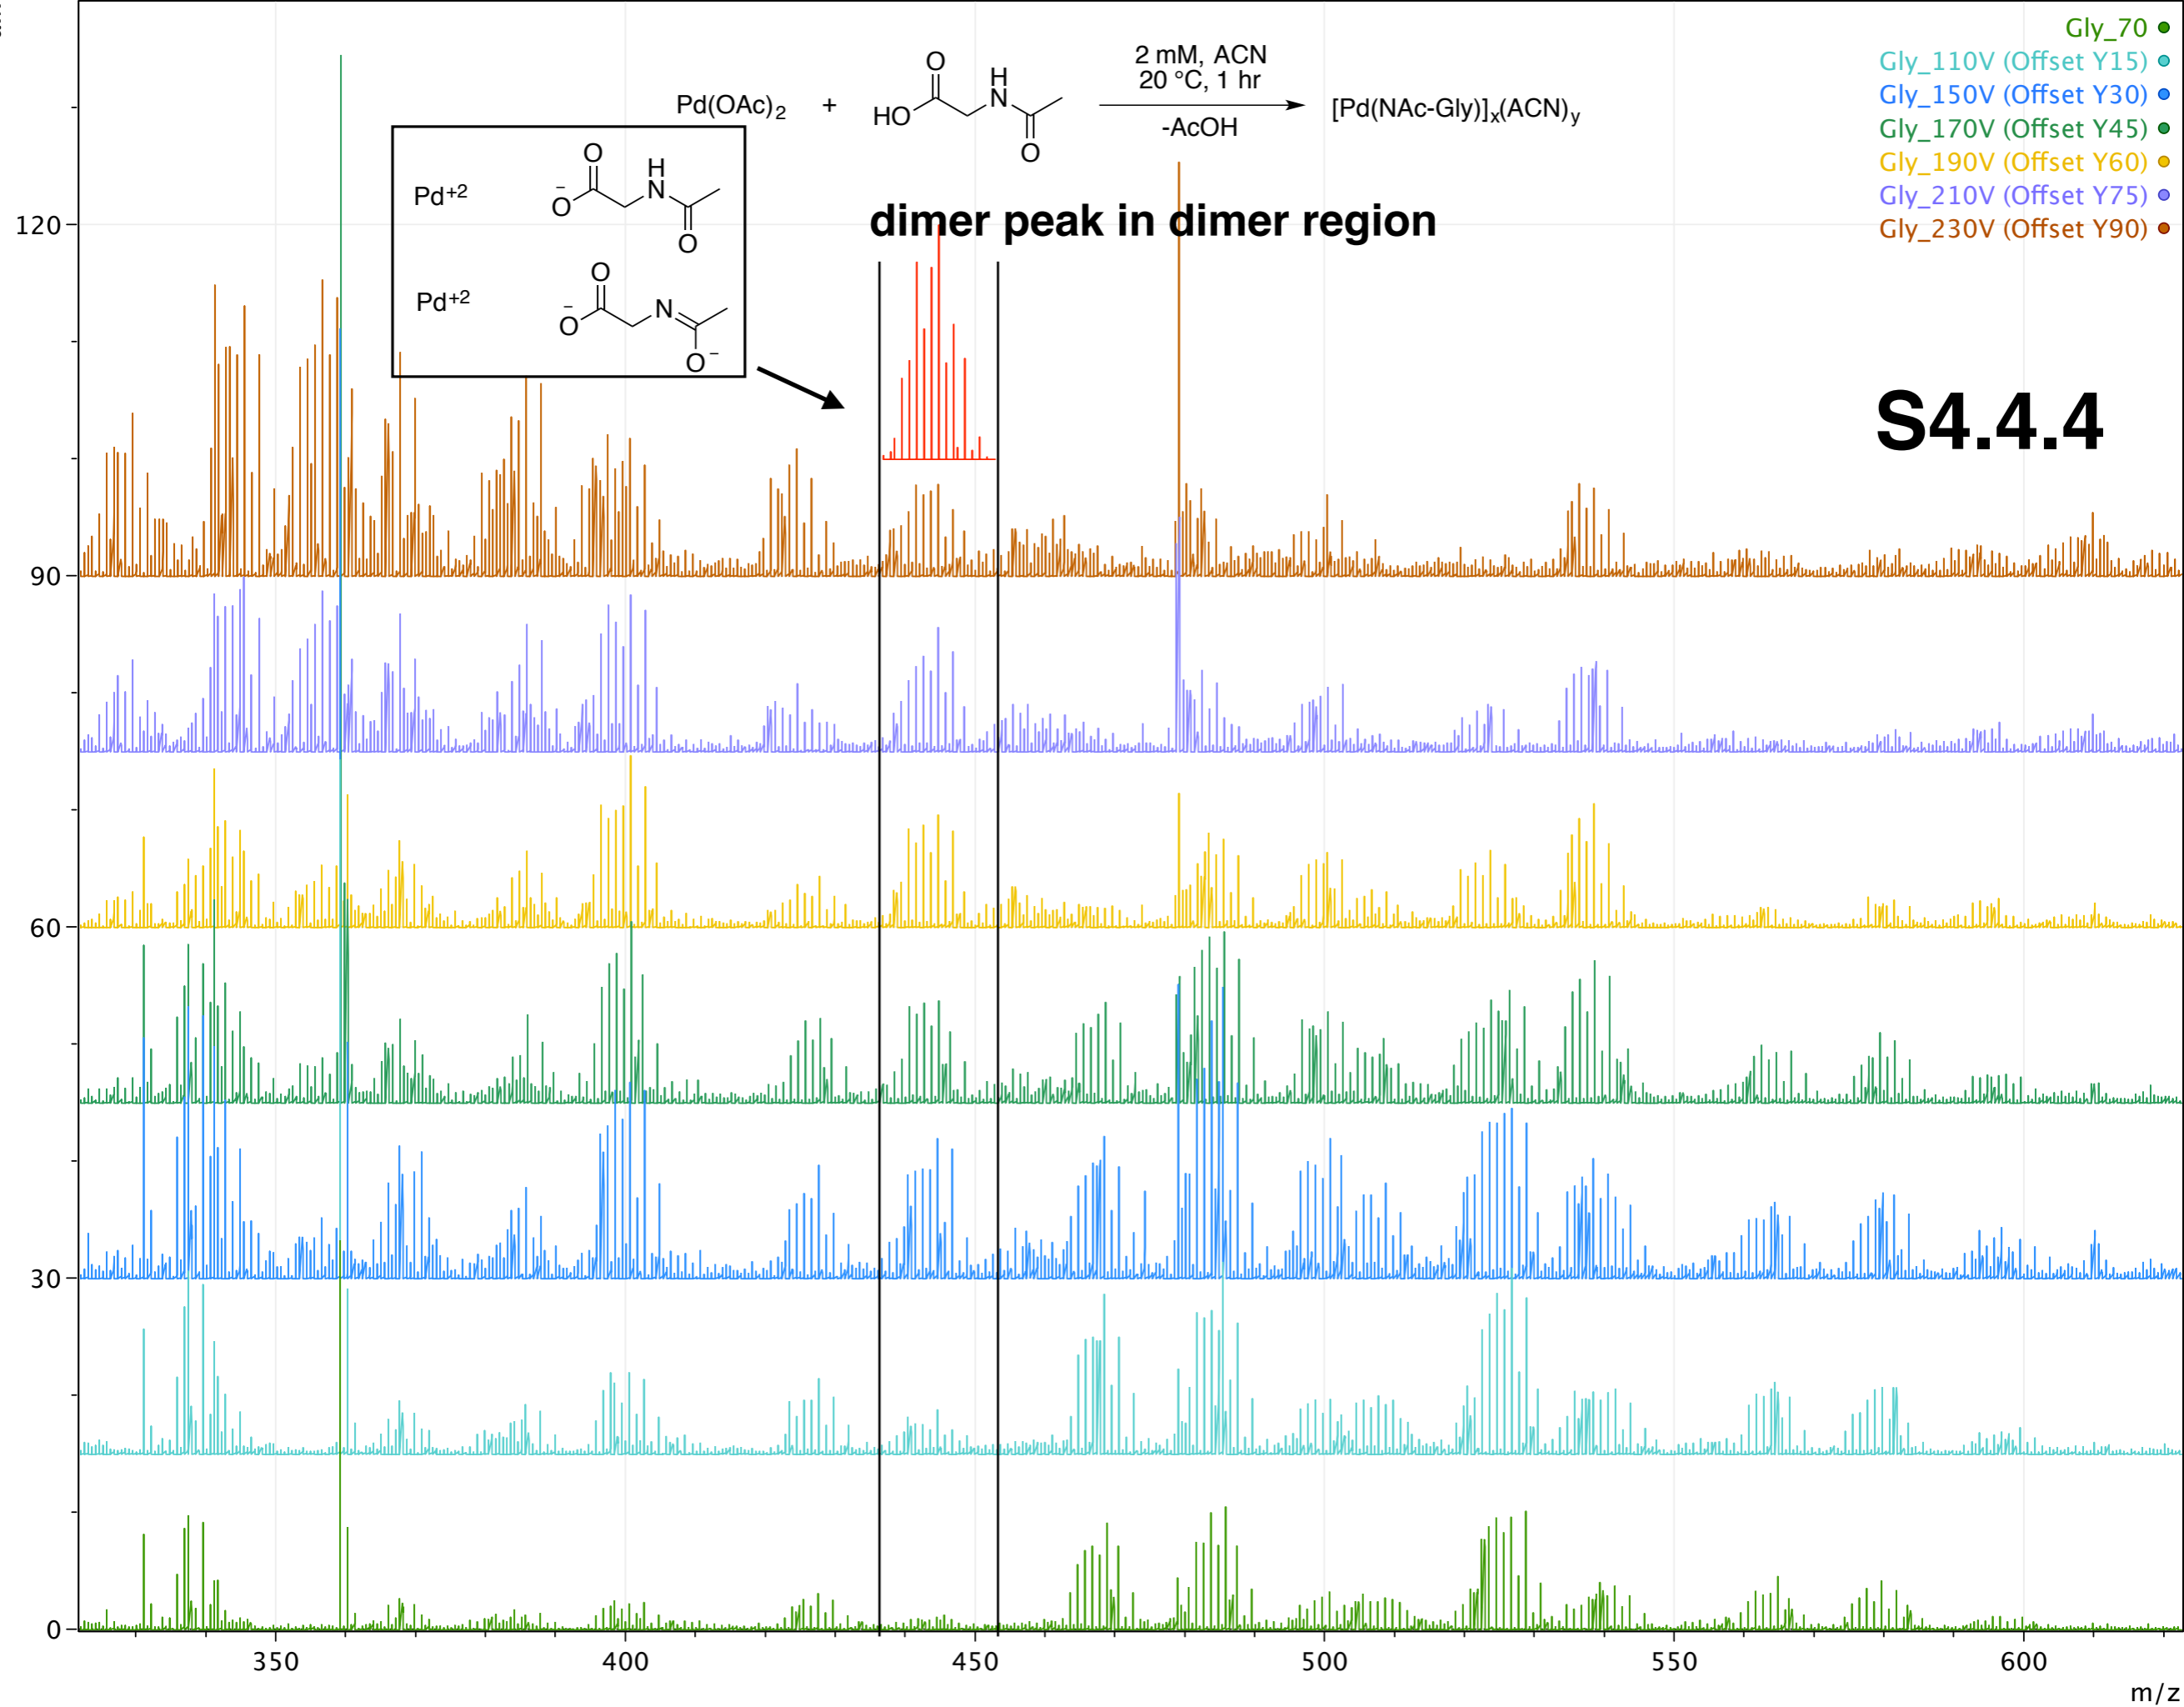

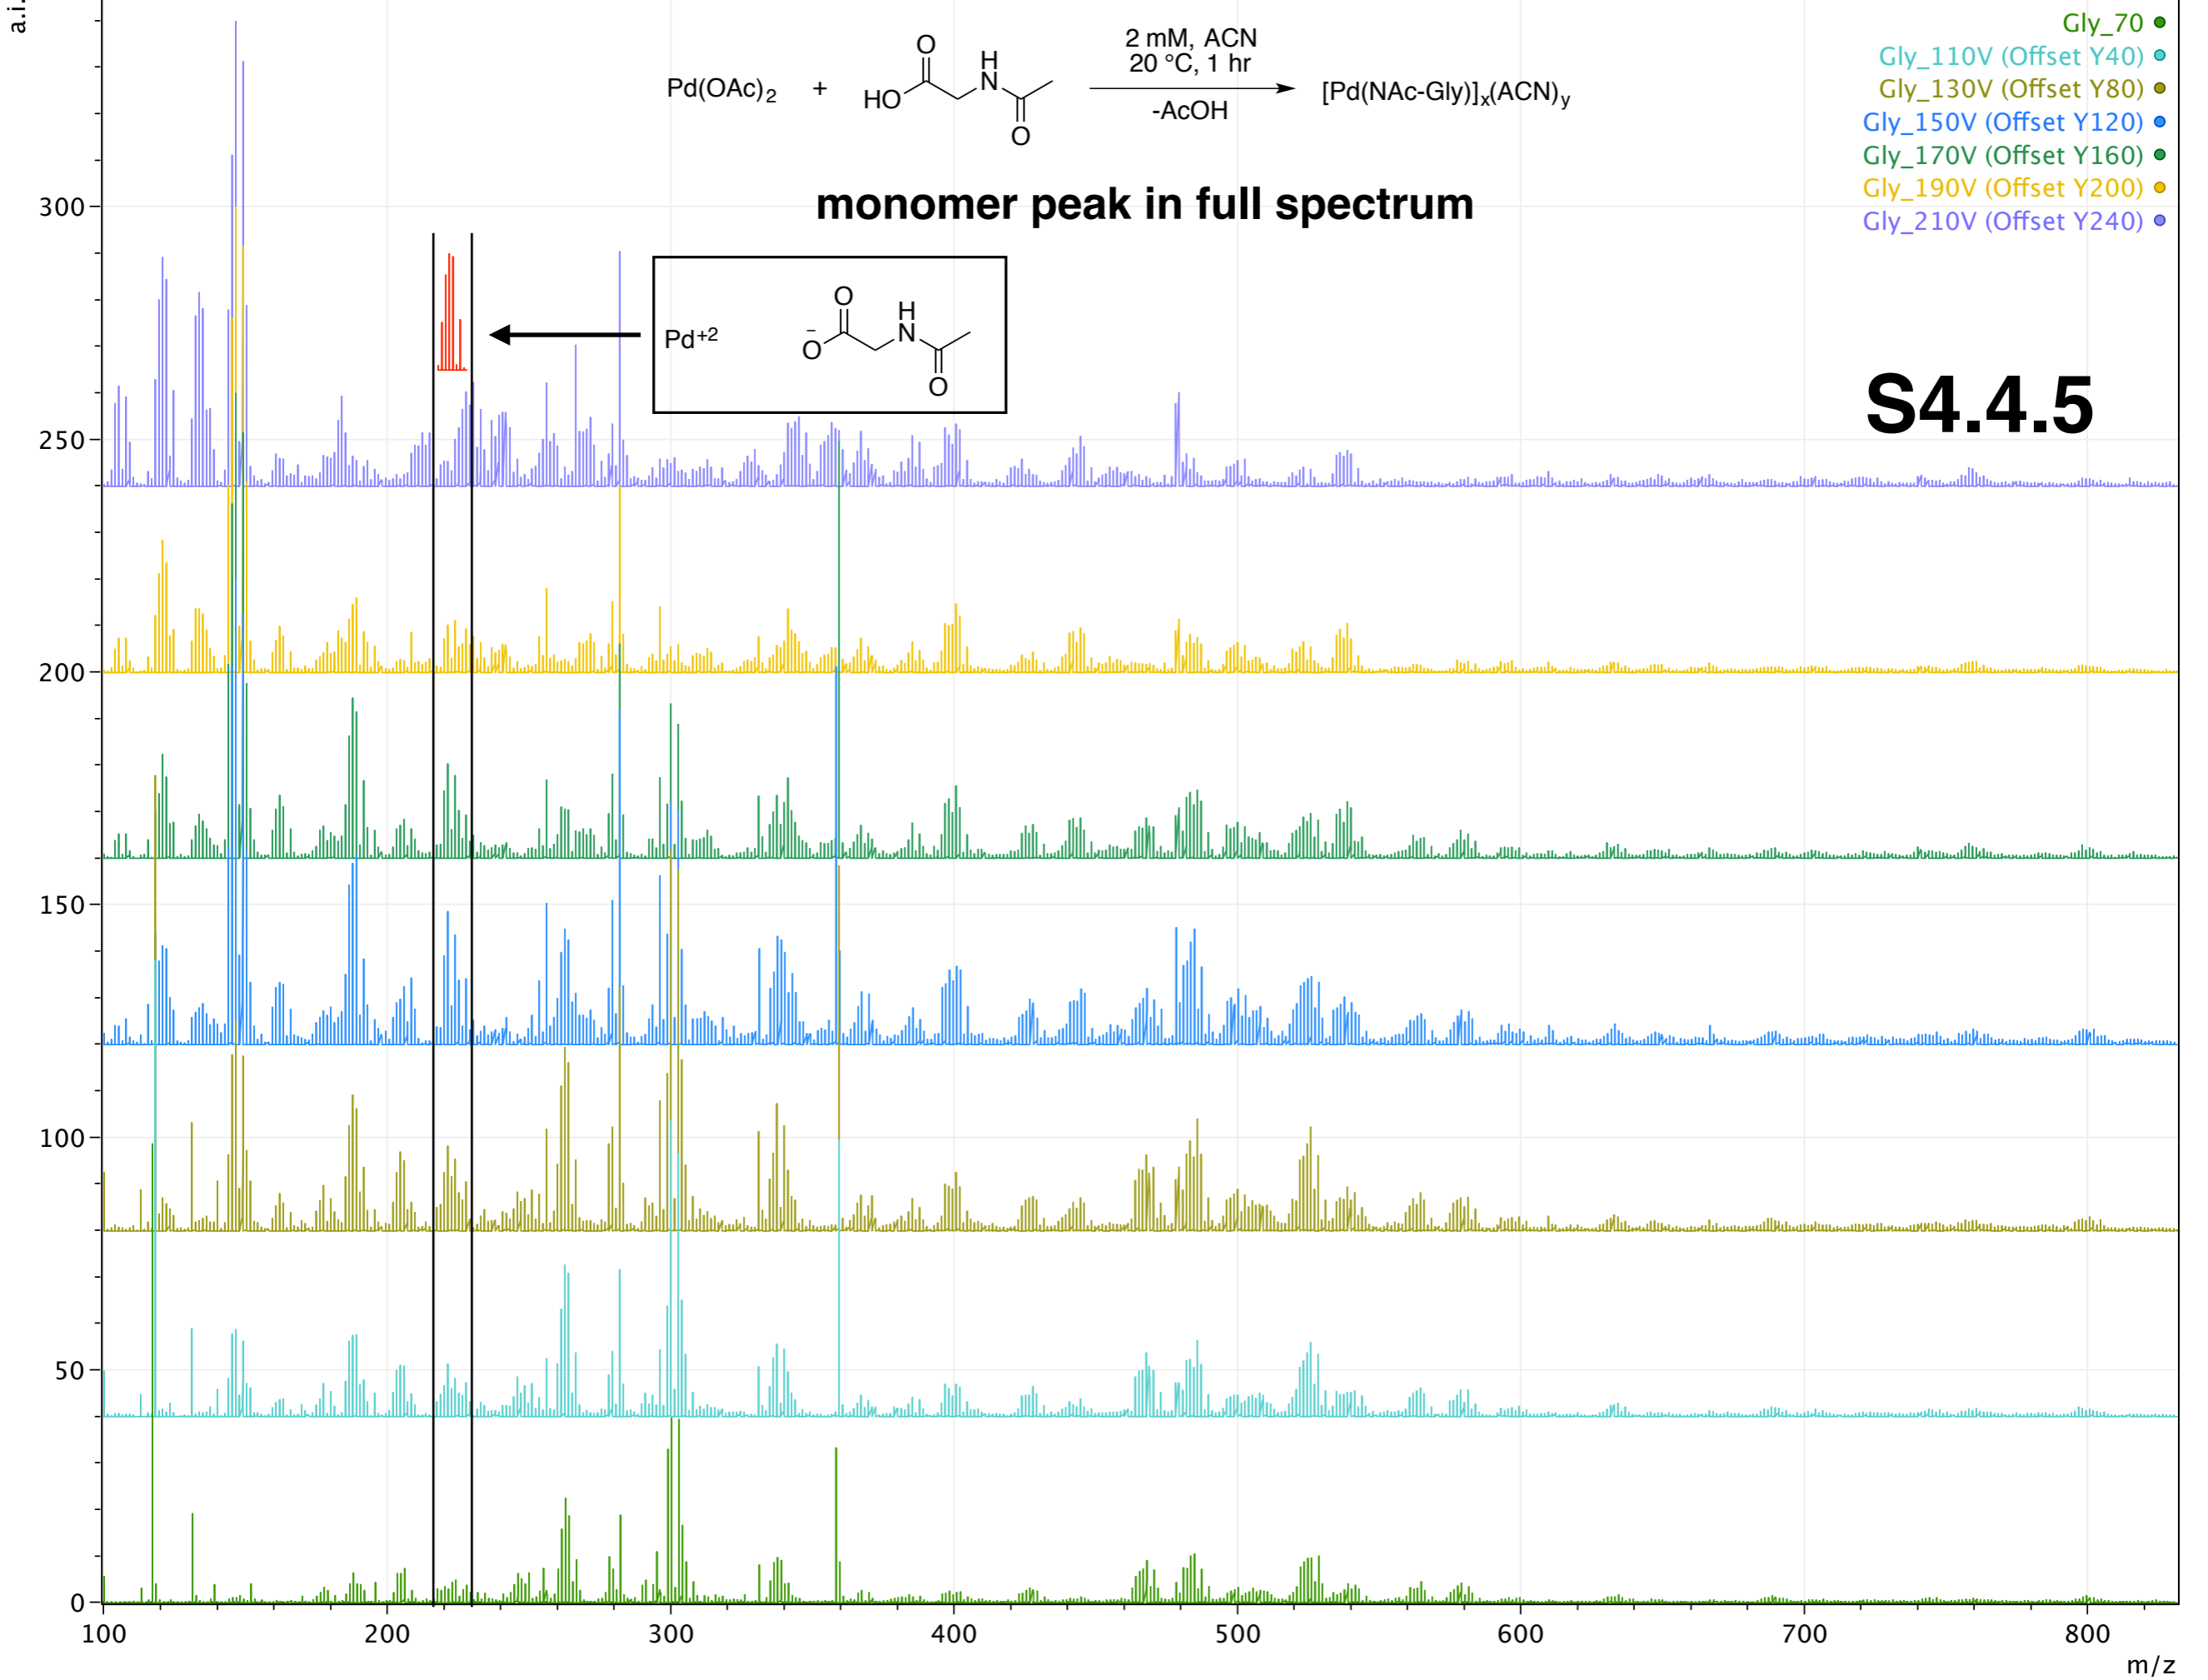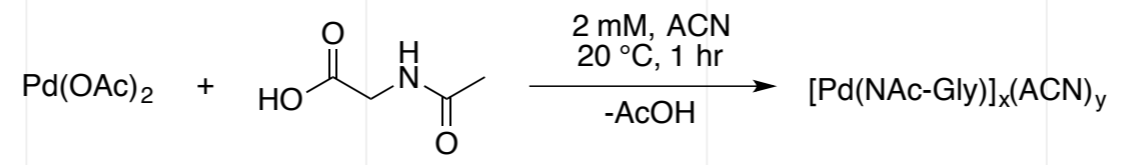

**monomer peak in full spectrum**

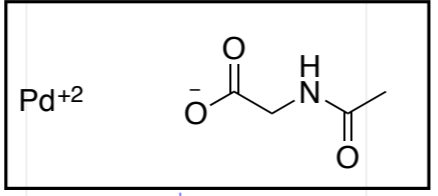

**S4.4.5**

- Gly\_70 ●
- Gly\_110V (Offset Y40) ●
- Gly\_130V (Offset Y80) ●
- Gly\_150V (Offset Y120) ●
- Gly\_170V (Offset Y160) ●
- Gly\_190V (Offset Y200) ●
- Gly\_210V (Offset Y240) ●

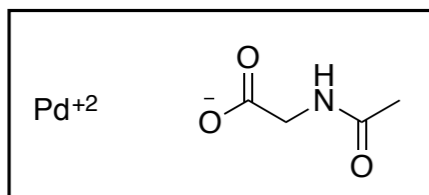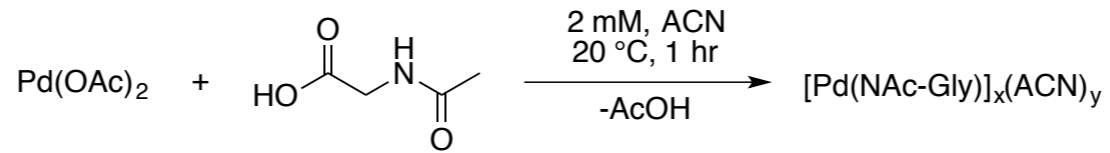

**S4.4.6**

**monomer peak in monomer region**

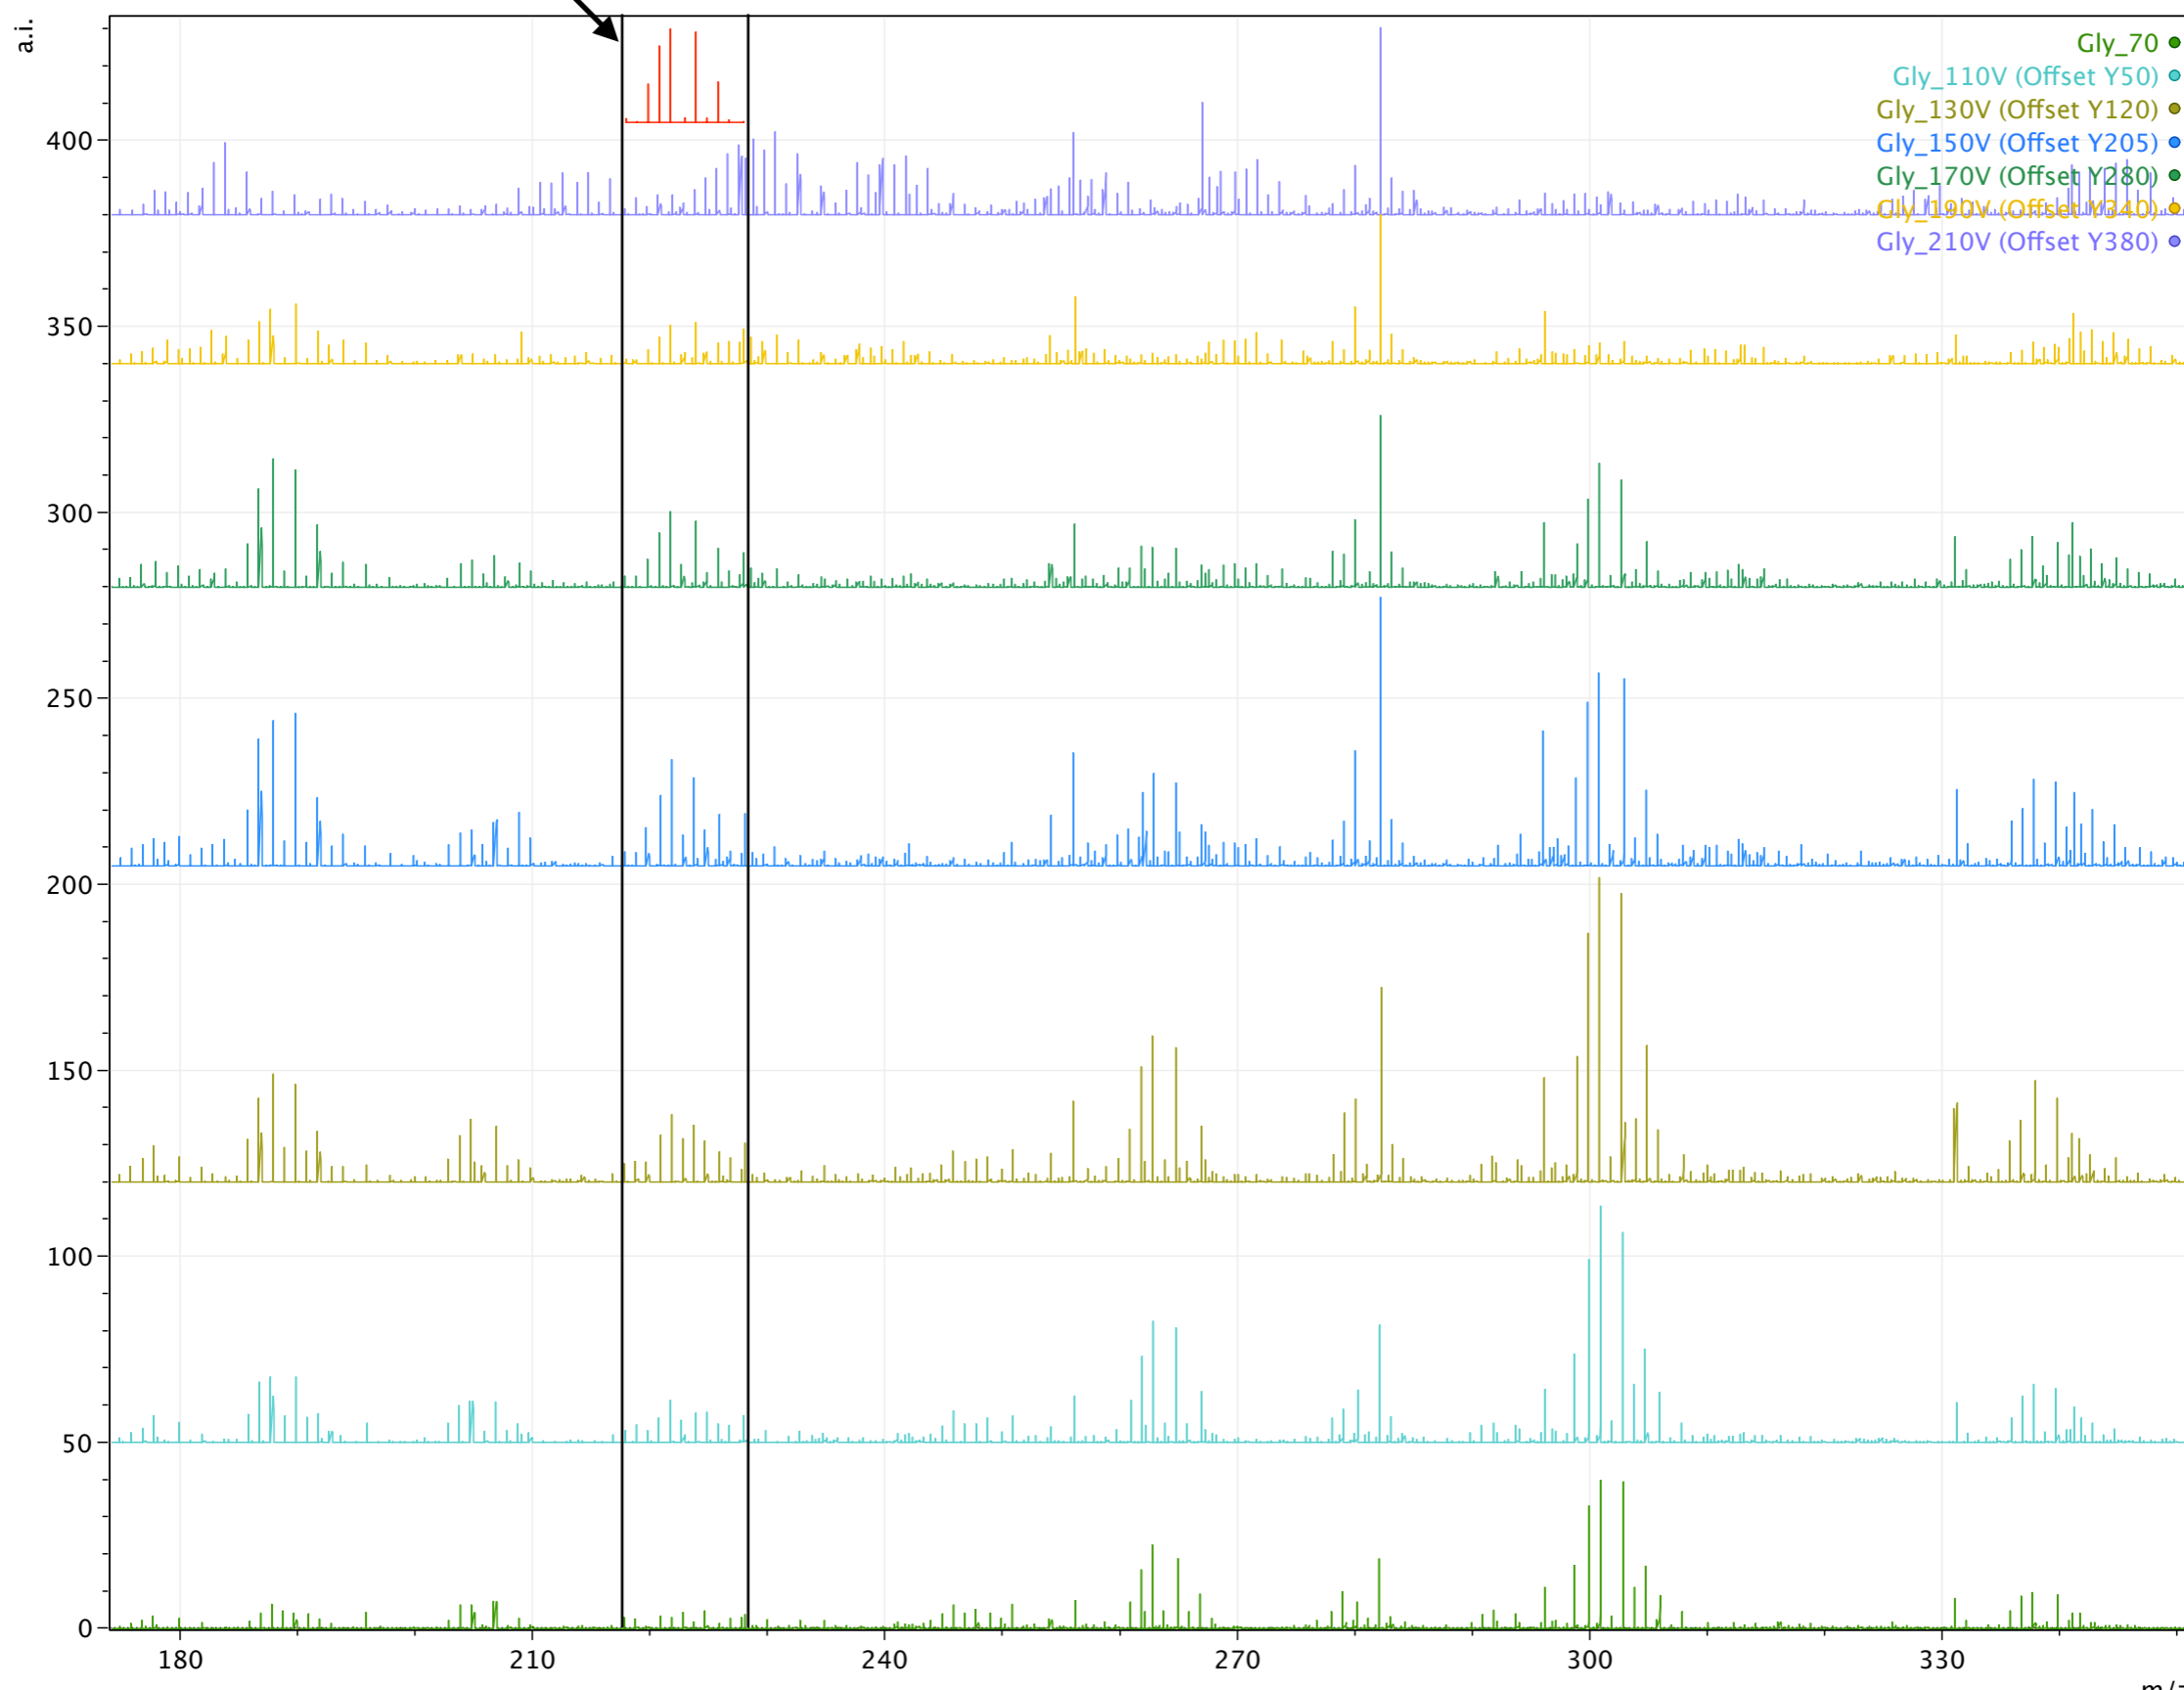

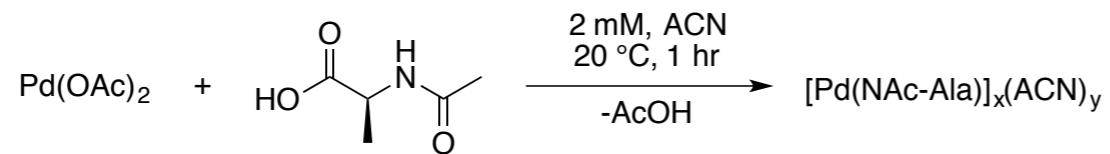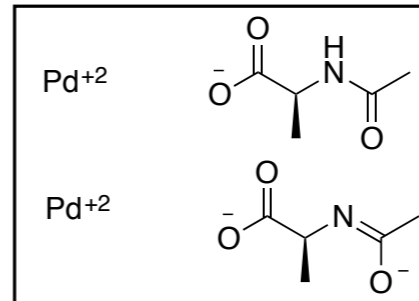

**S4.5.1**

**observed and theoretical isotope pattern for Pd MPAA dimer**

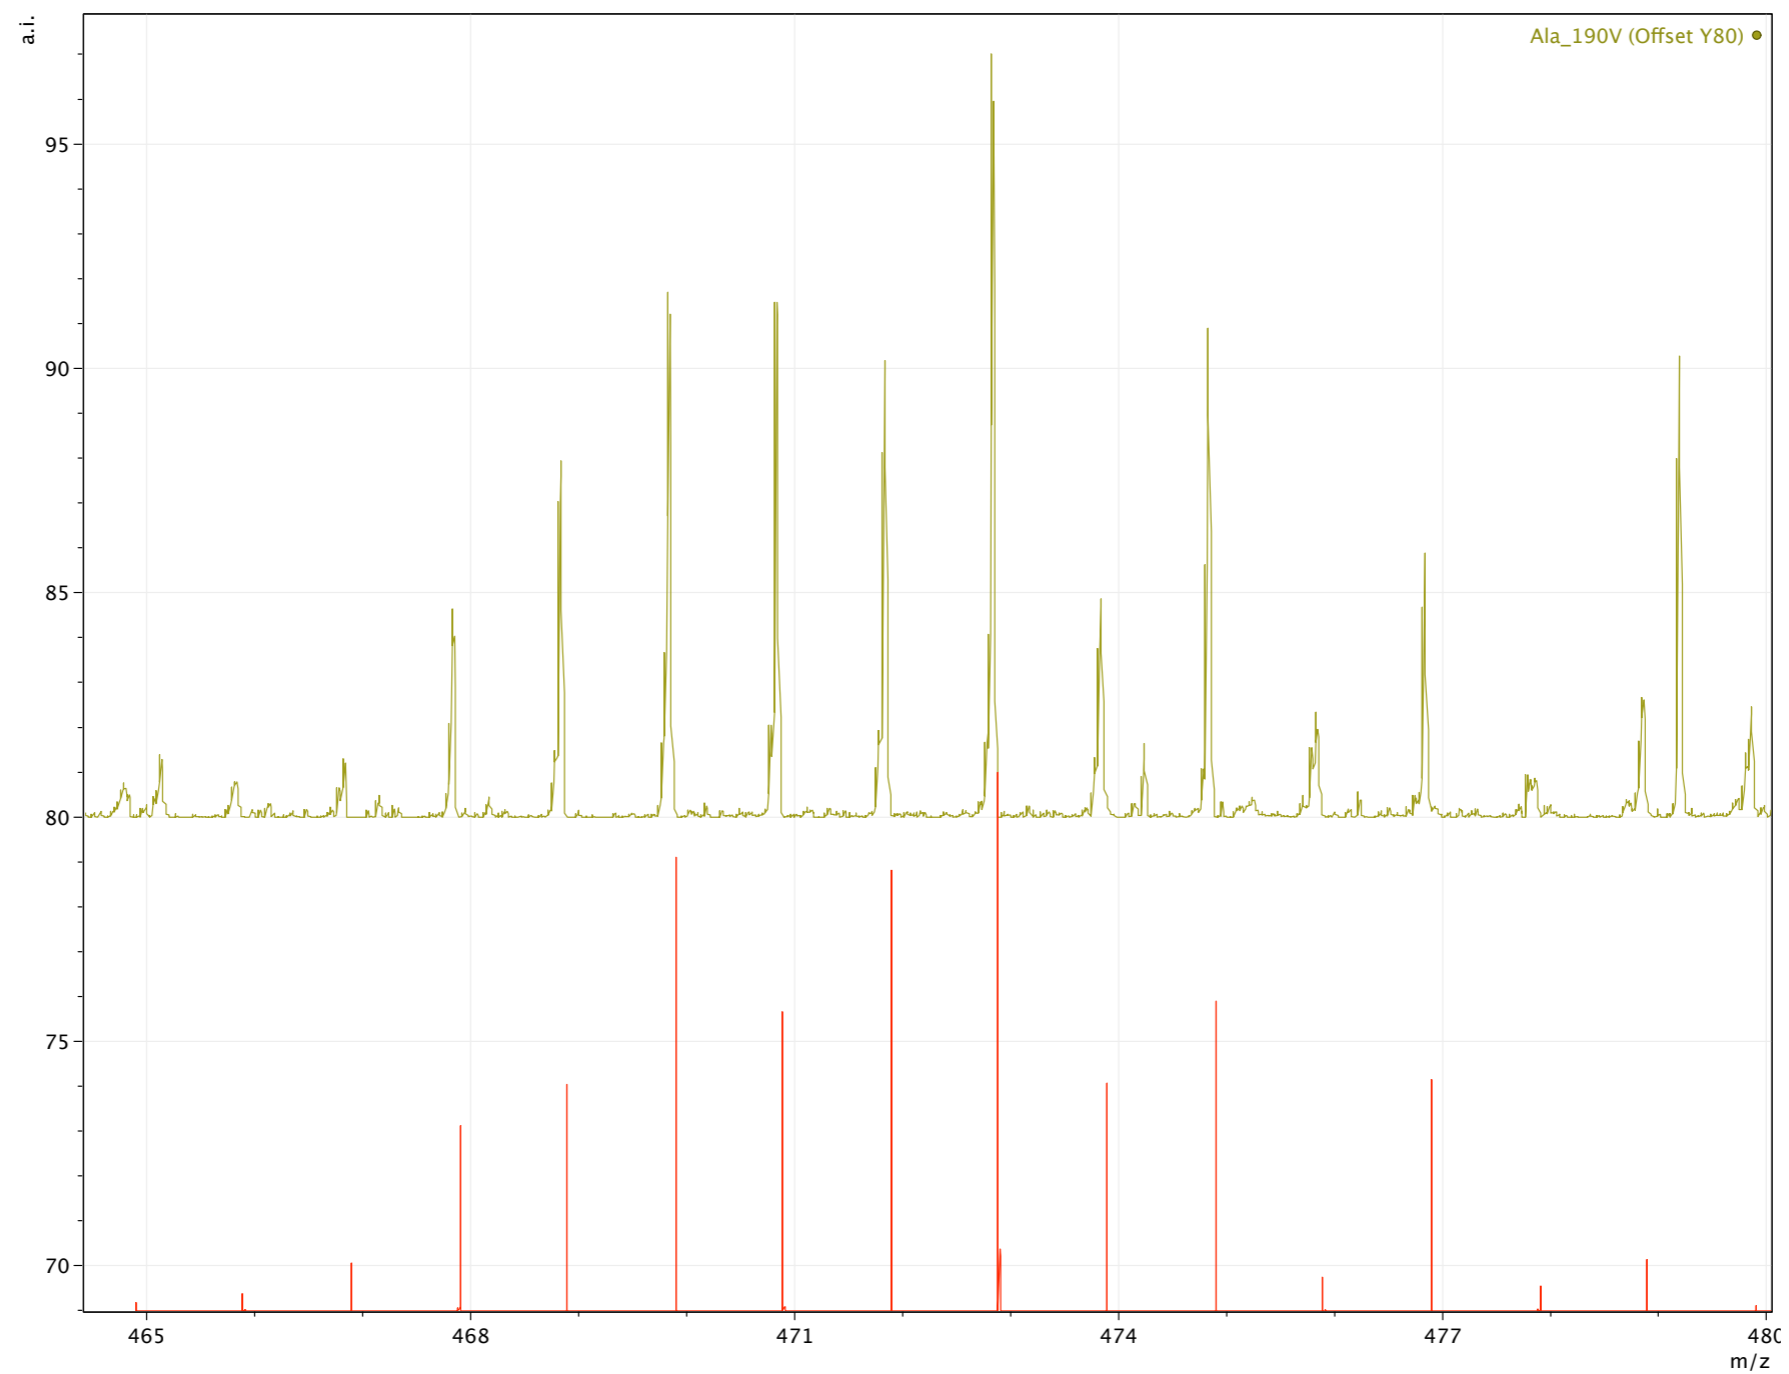



# S4.5.2

**observed and theoretical isotope pattern for Pd MPAA monomer**

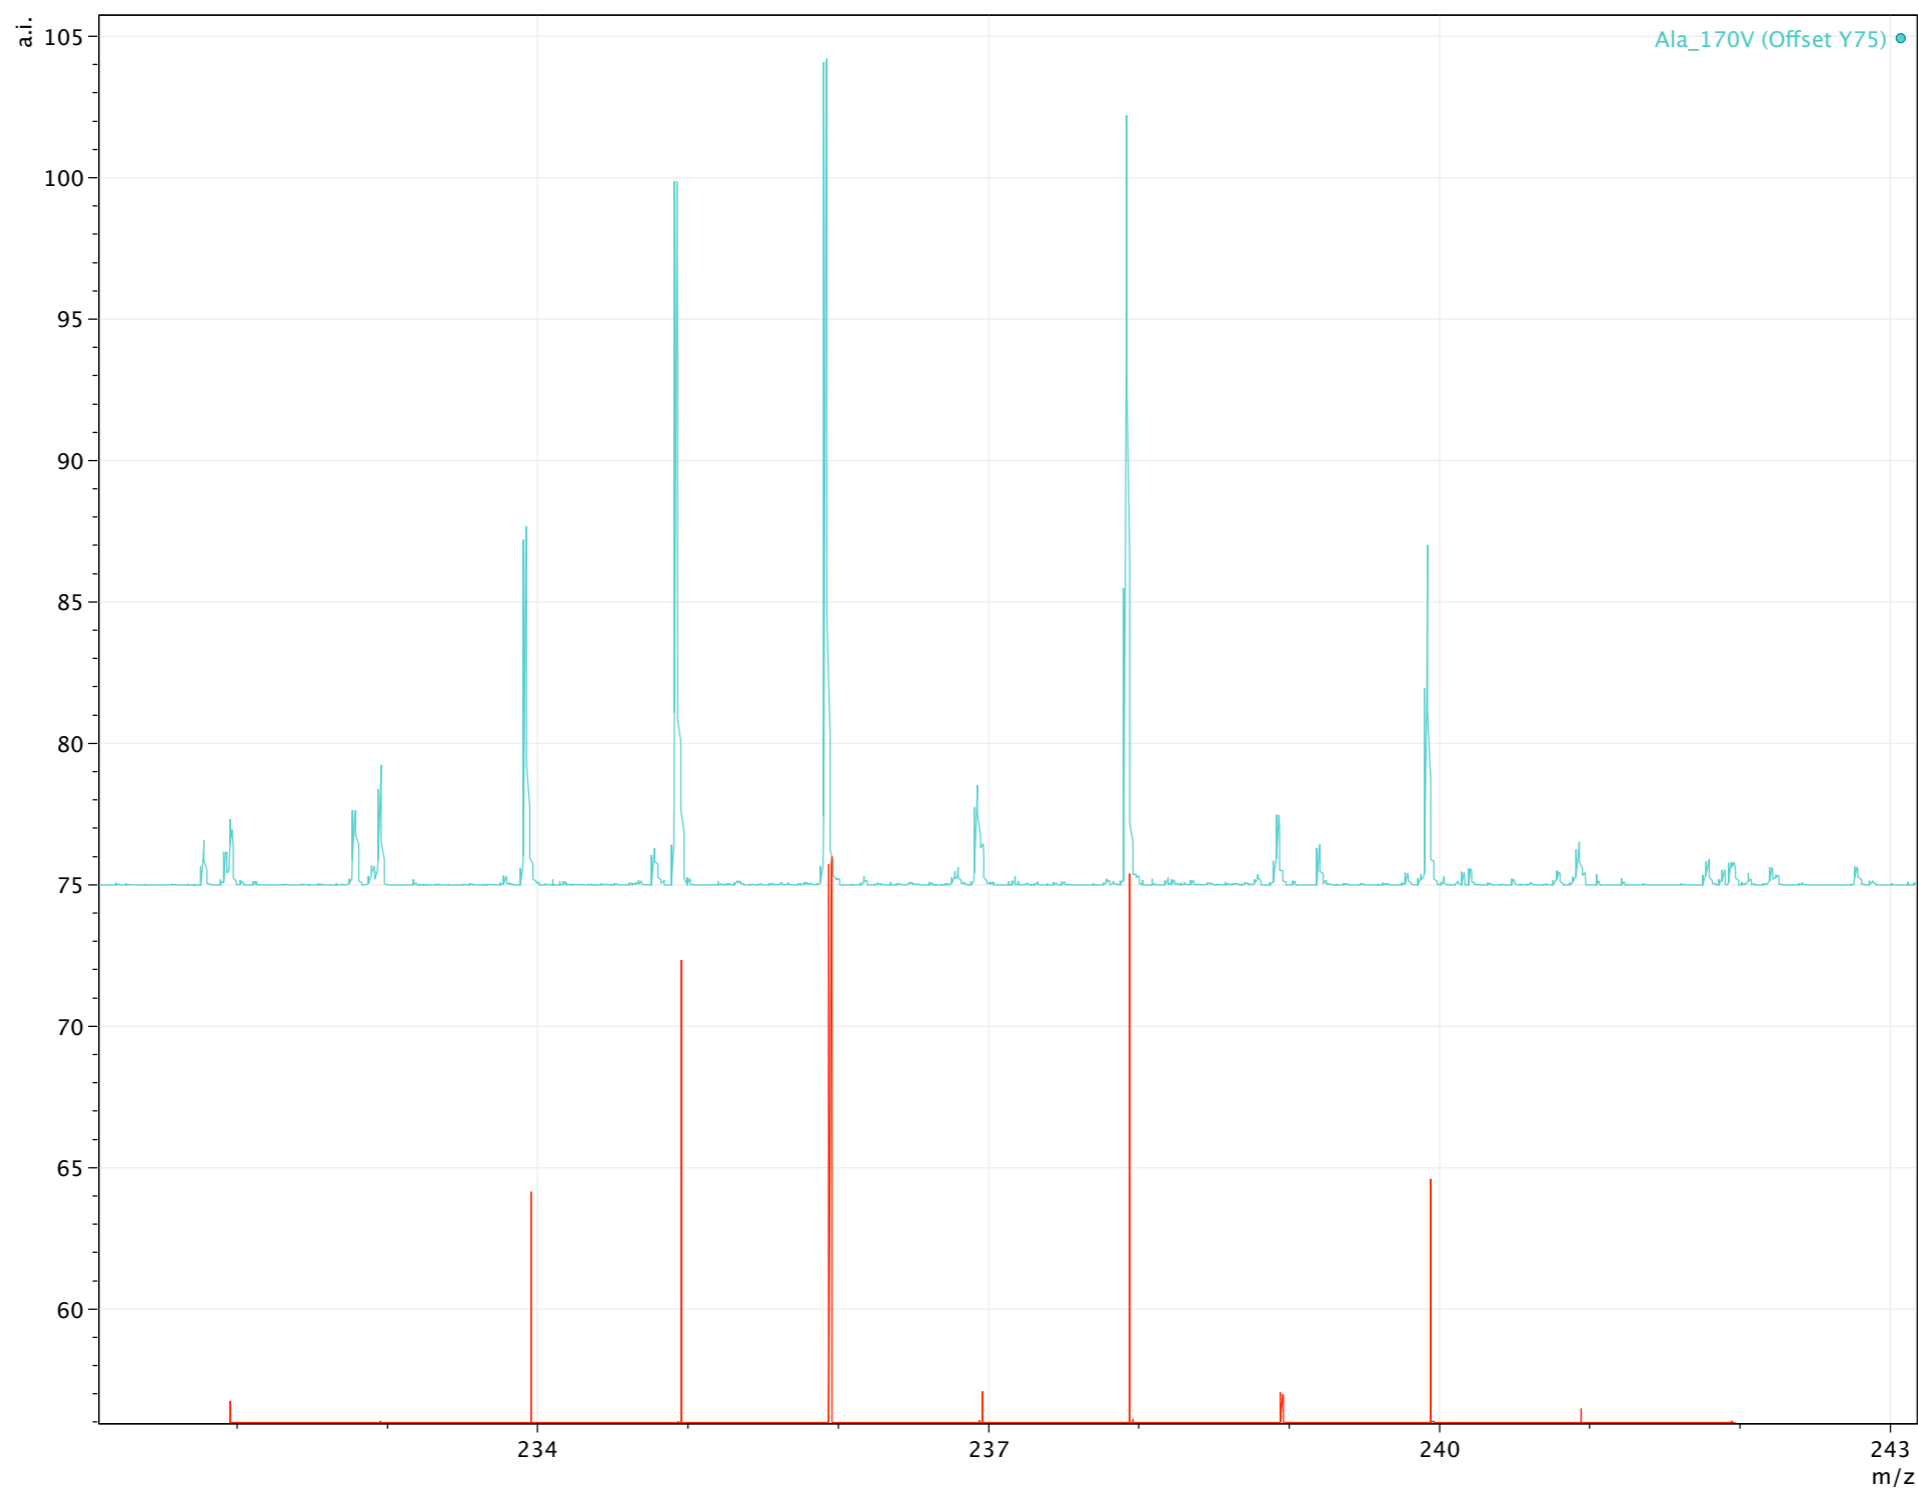

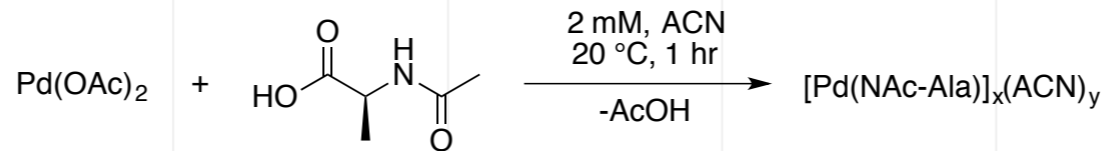

**dimer peak in full spectrum**

**S4.5.3**

- Ala\_70V ●
- Ala\_110V (Offset Y20) ●
- Ala\_150V (Offset Y40) ●
- Ala\_170V (Offset Y60) ●
- Ala\_190V (Offset Y80) ●
- Ala\_210V (Offset Y100) ●
- Ala\_230V (Offset Y120) ●

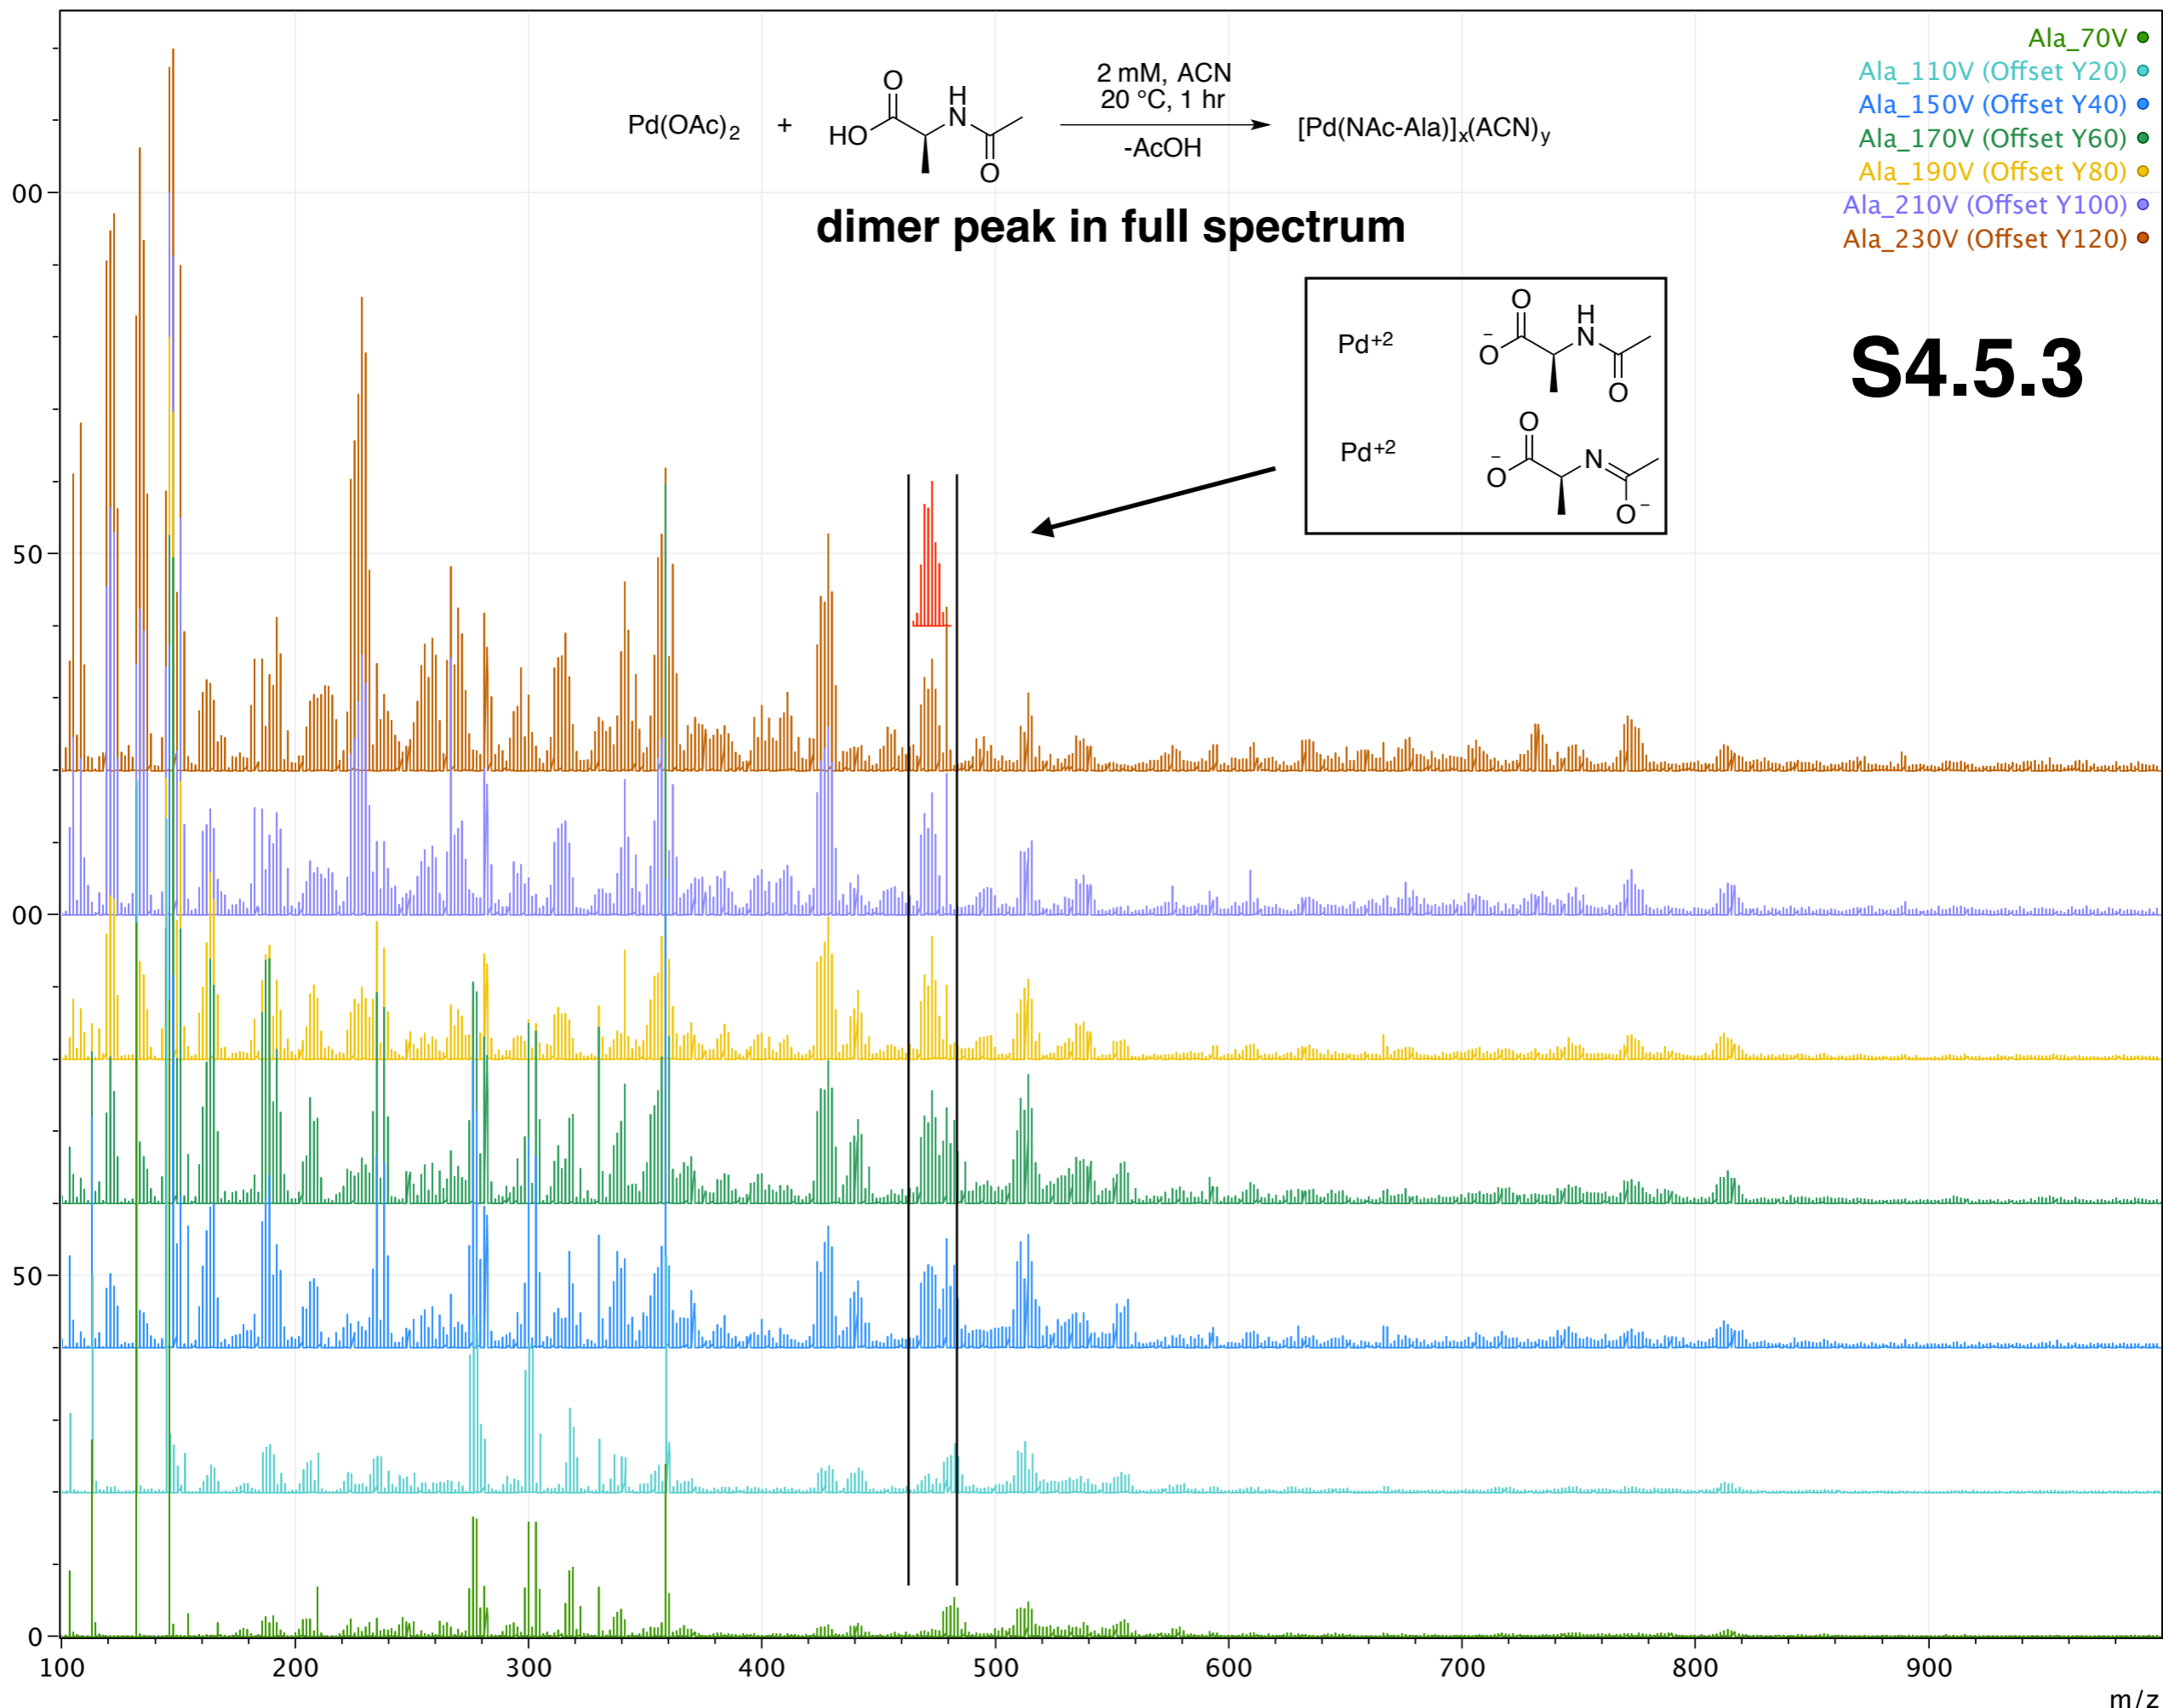



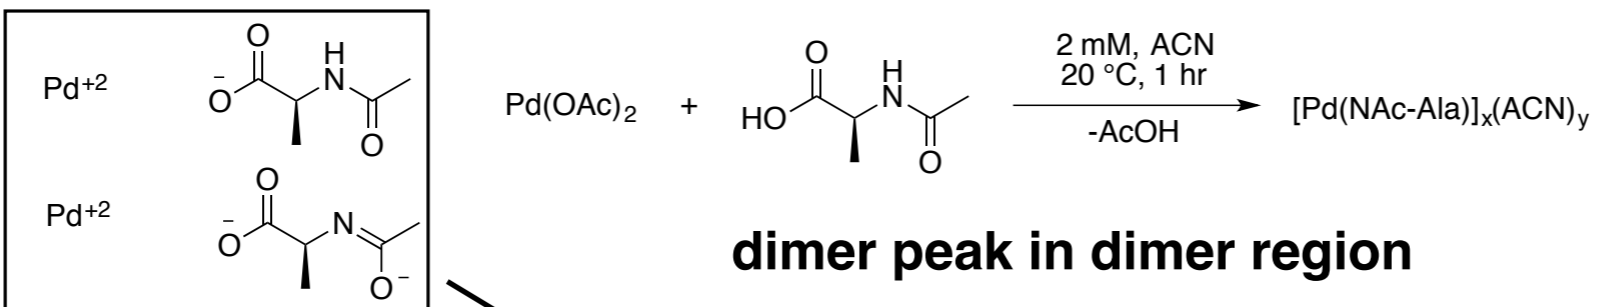

# S4.5.4

**dimer peak in dimer region**

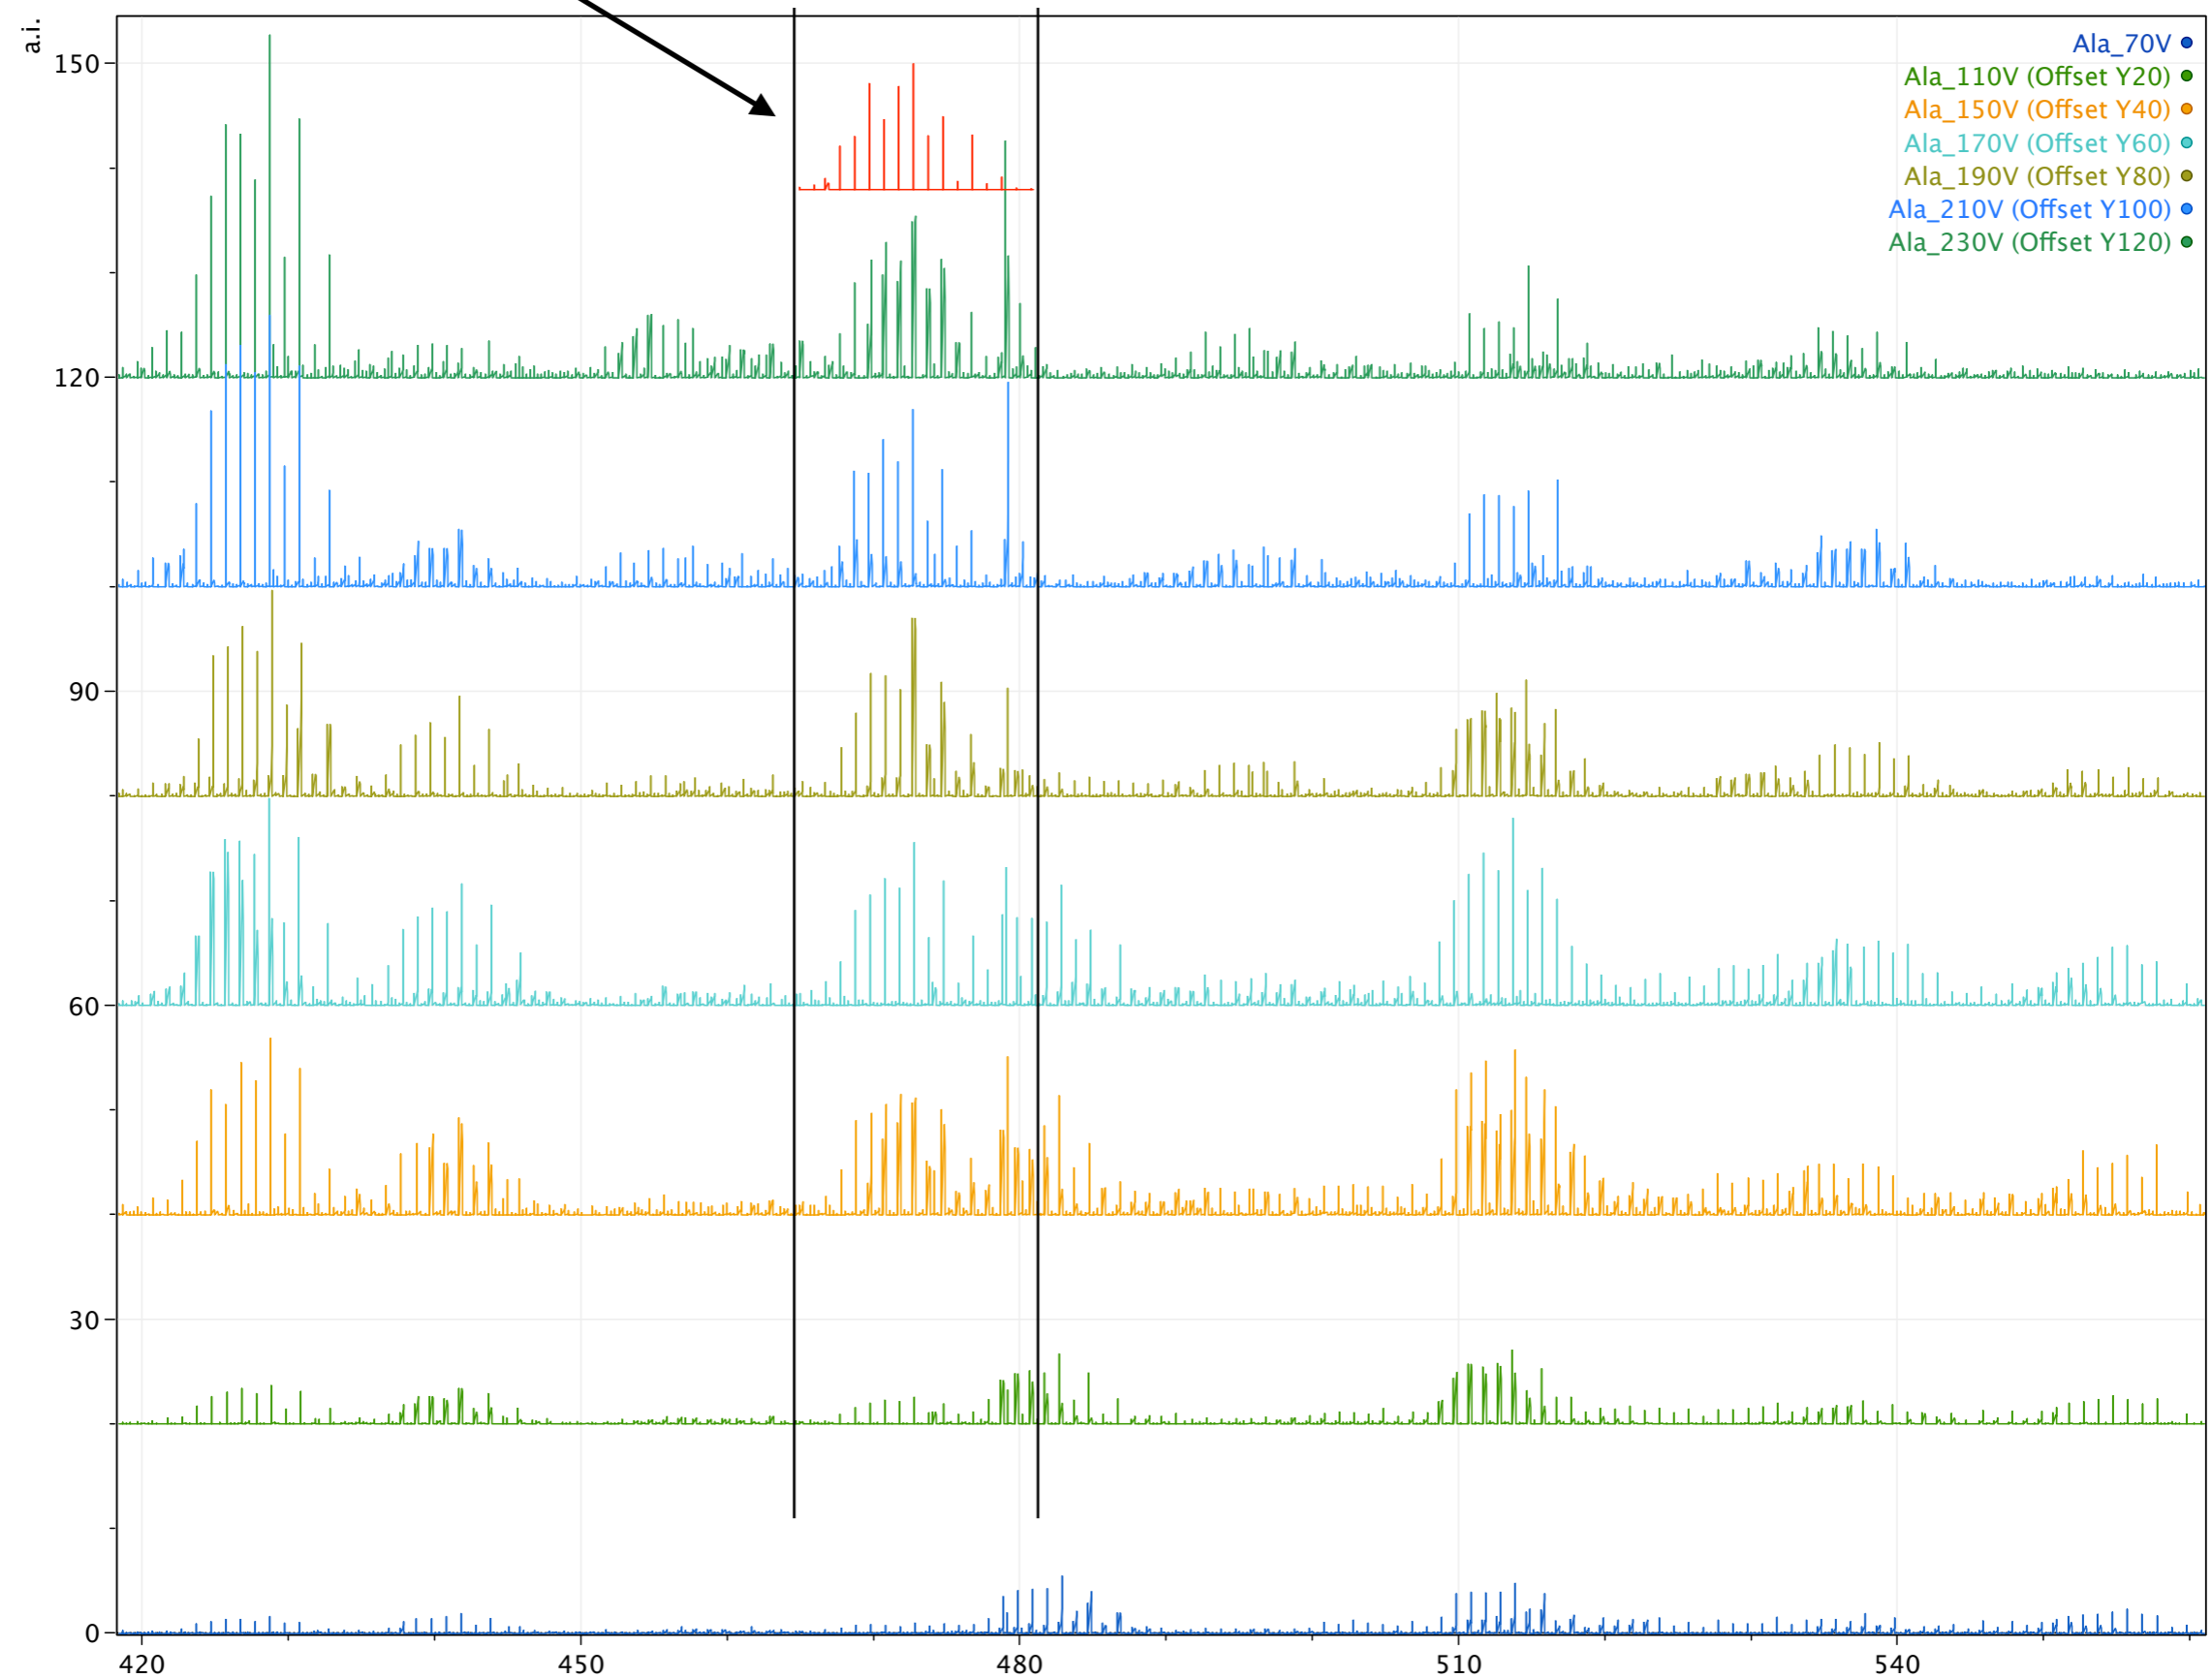

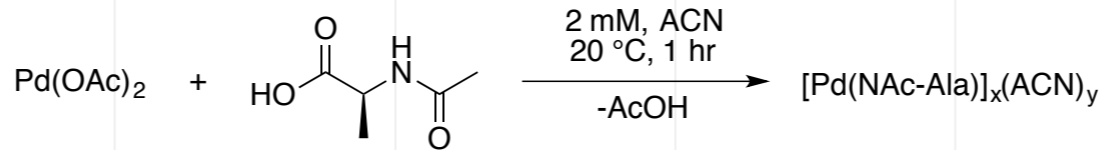

monomer peak in full spectrum

**S4.5.5**

- Ala\_70V ●
- Ala\_110V (Offset Y20) ●
- Ala\_150V (Offset Y45) ●
- Ala\_170V (Offset Y75) ●
- Ala\_190V (Offset Y105) ●
- Ala\_210V (Offset Y130) ●

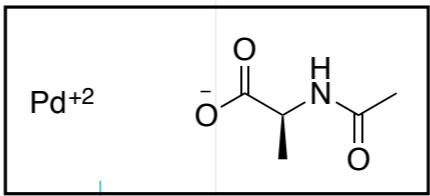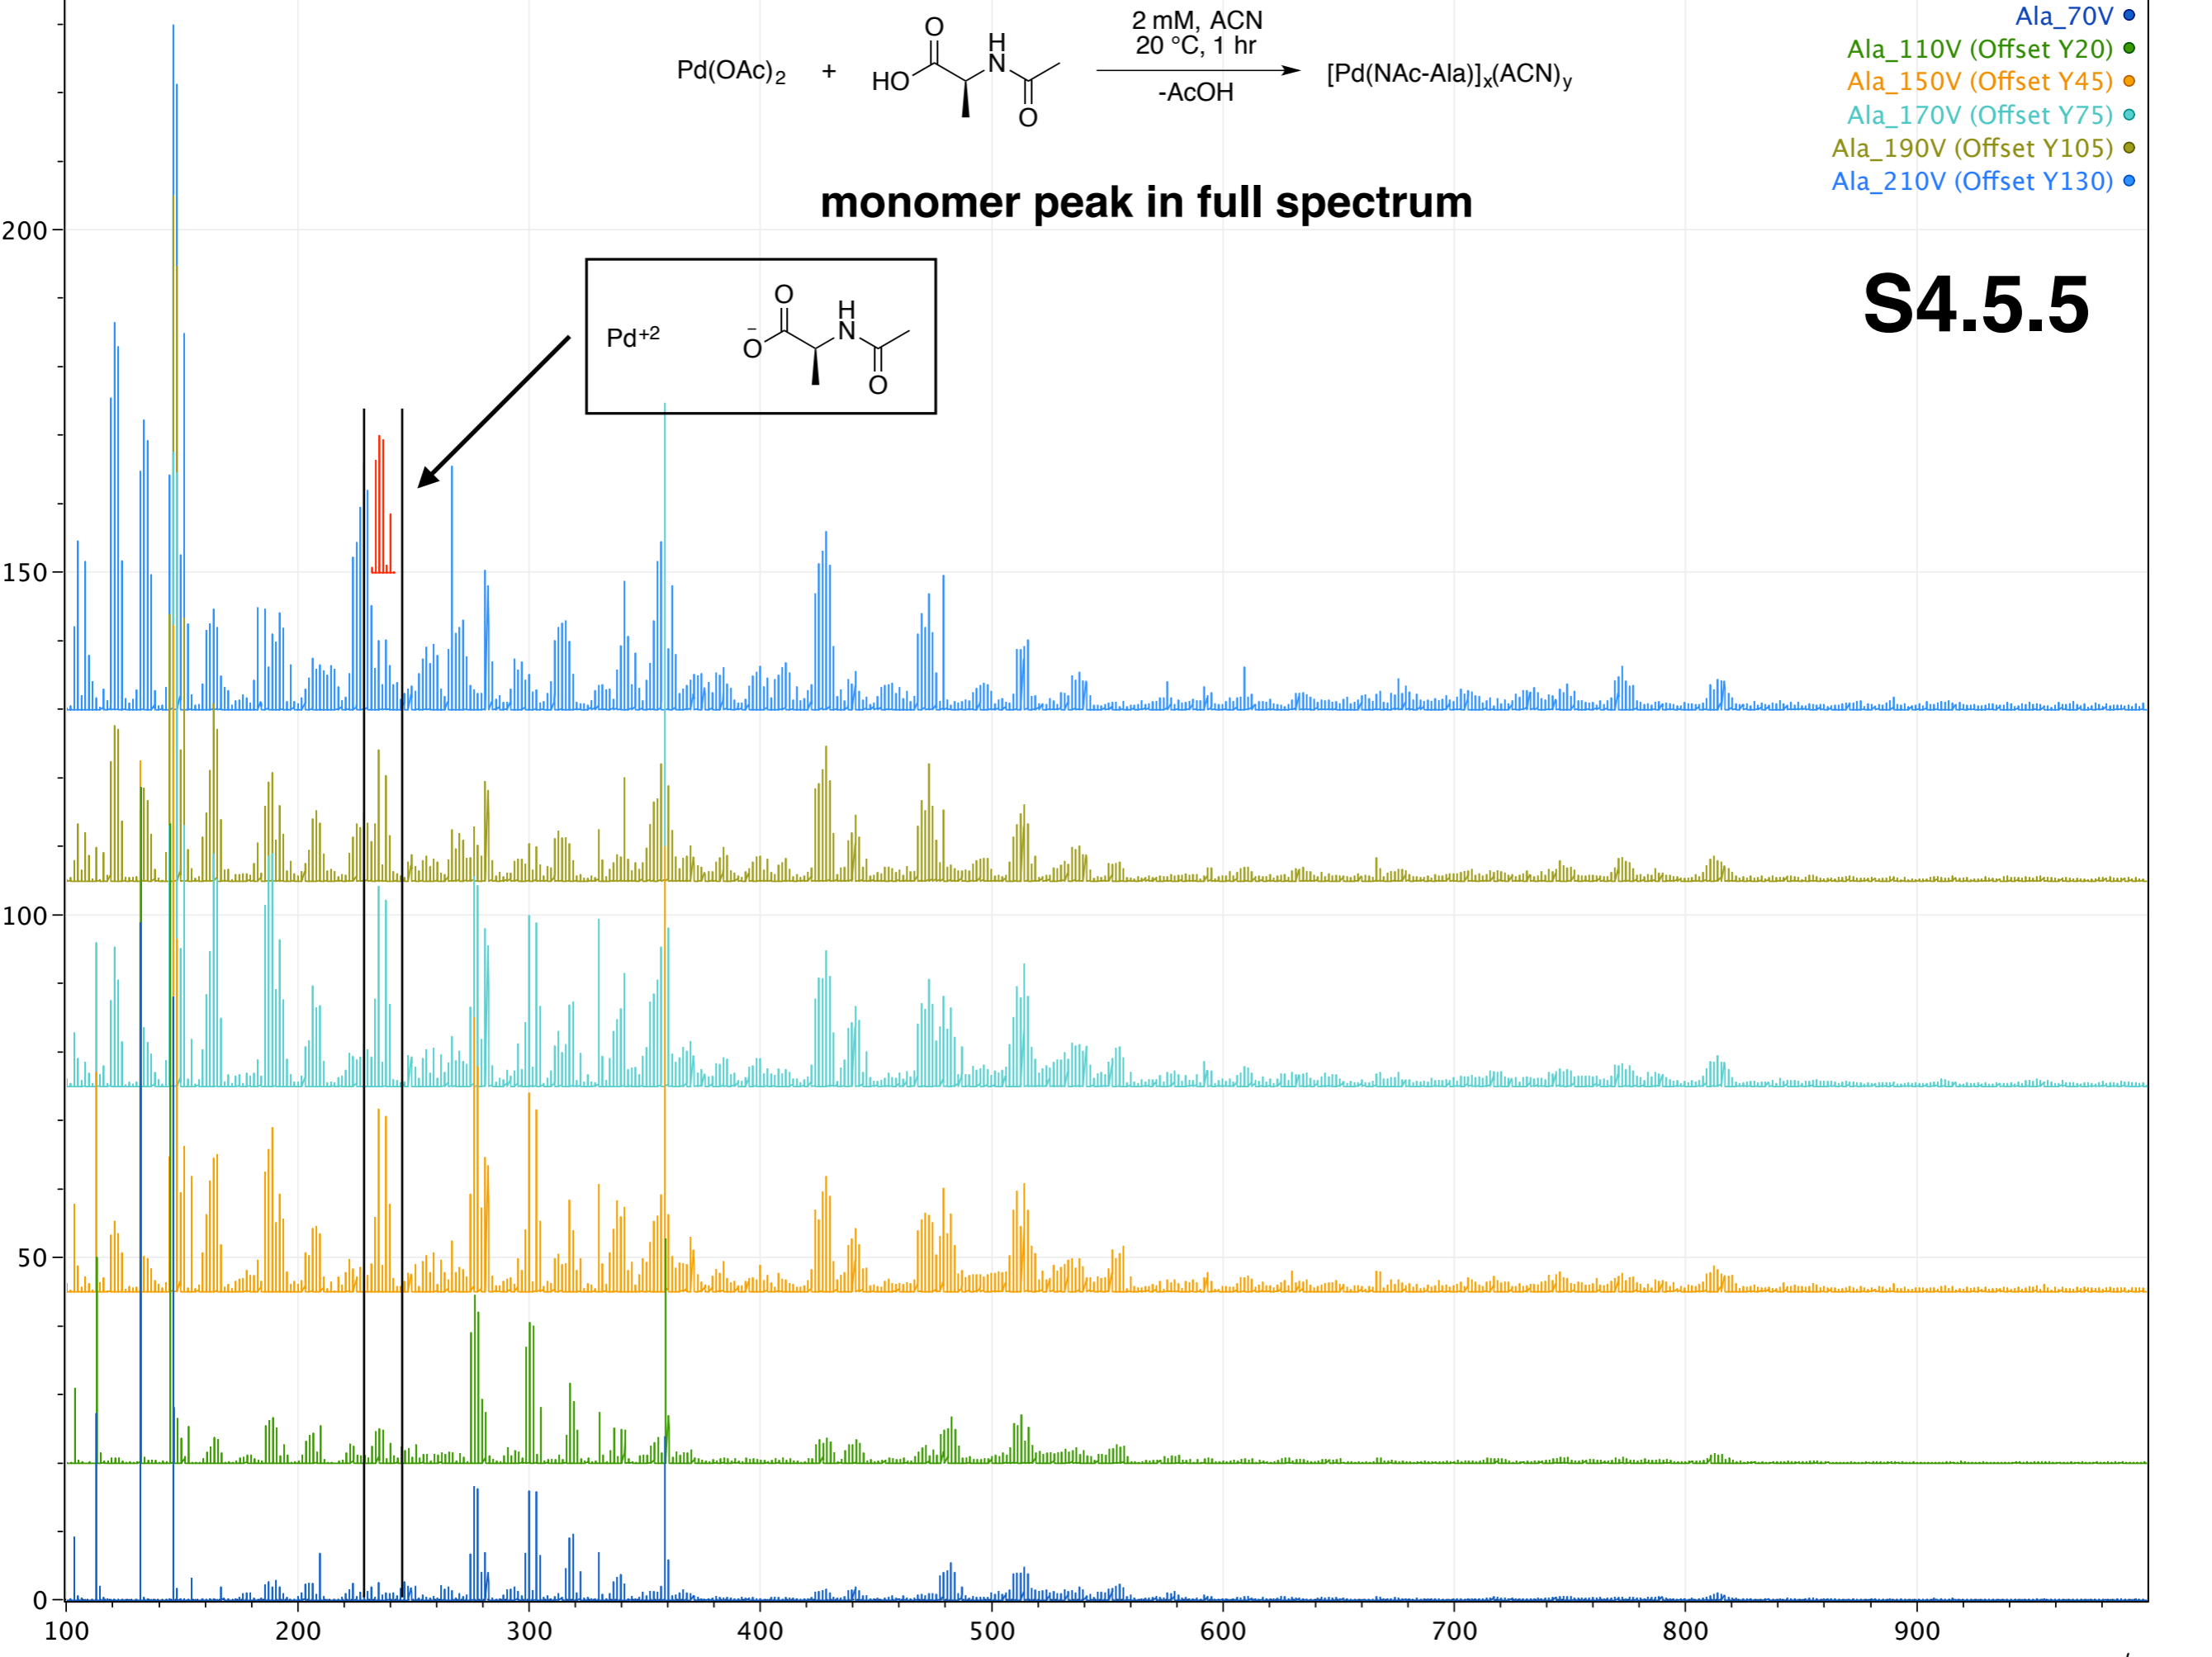

a.u.

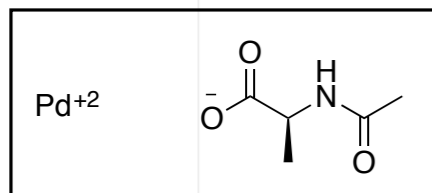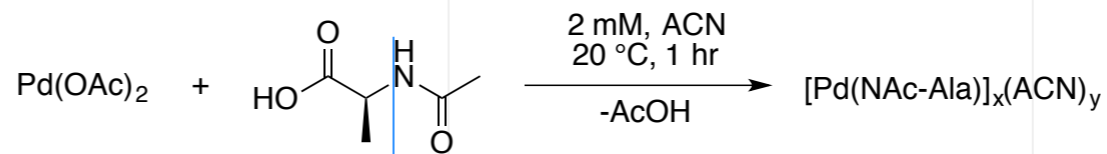

- Ala\_70V ●
- Ala\_110V (Offset Y20) ●
- Ala\_150V (Offset Y45) ●
- Ala\_170V (Offset Y75) ●
- Ala\_190V (Offset Y105) ●
- Ala\_210V (Offset Y130) ●

monomer peak in monomer region

S4.5.6

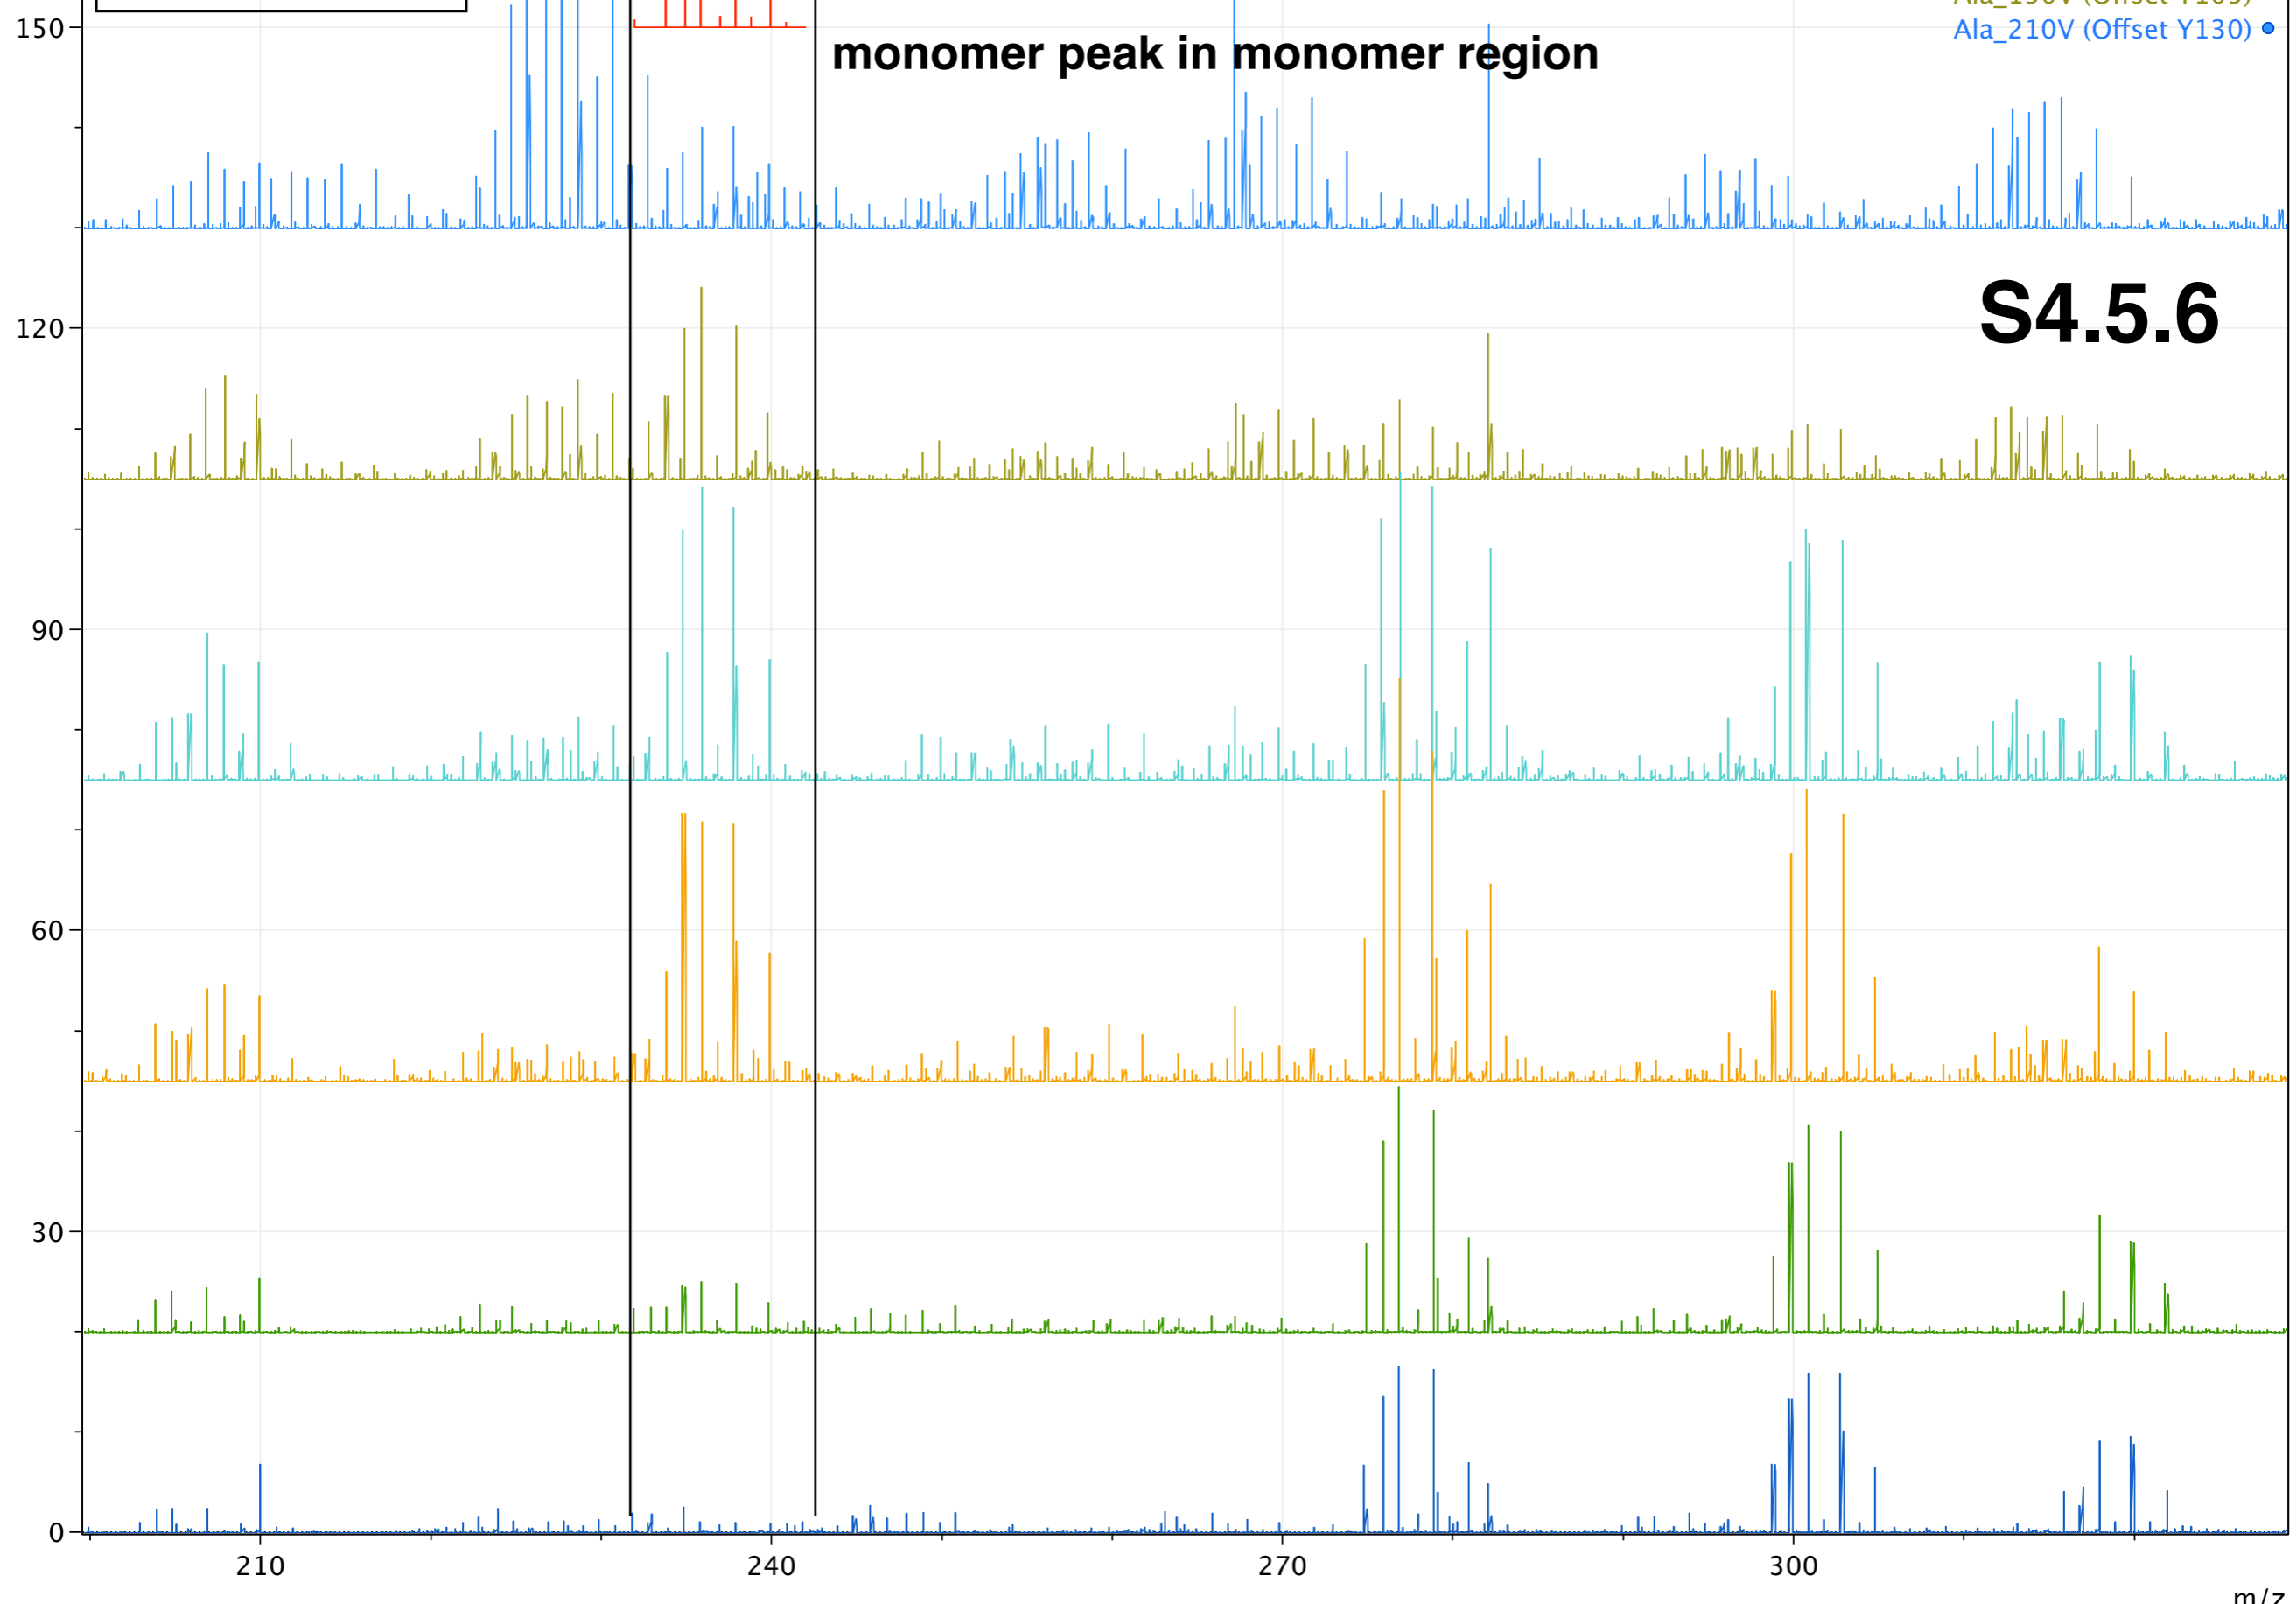

m/z

# S4.6.1

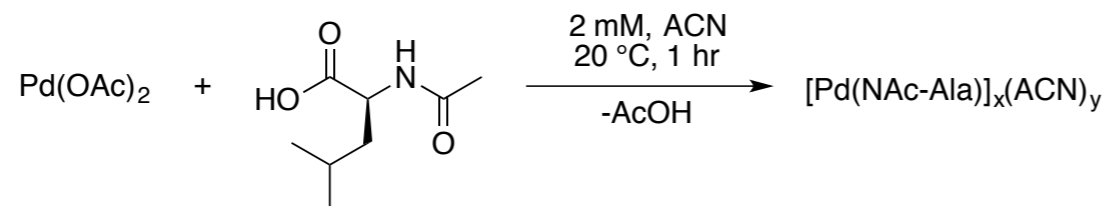

**observed and theoretical isotope pattern for Pd MPAA dimer**

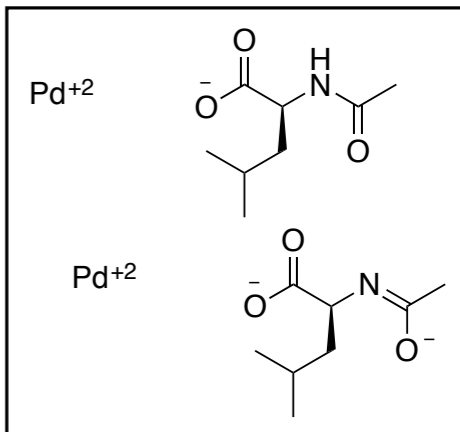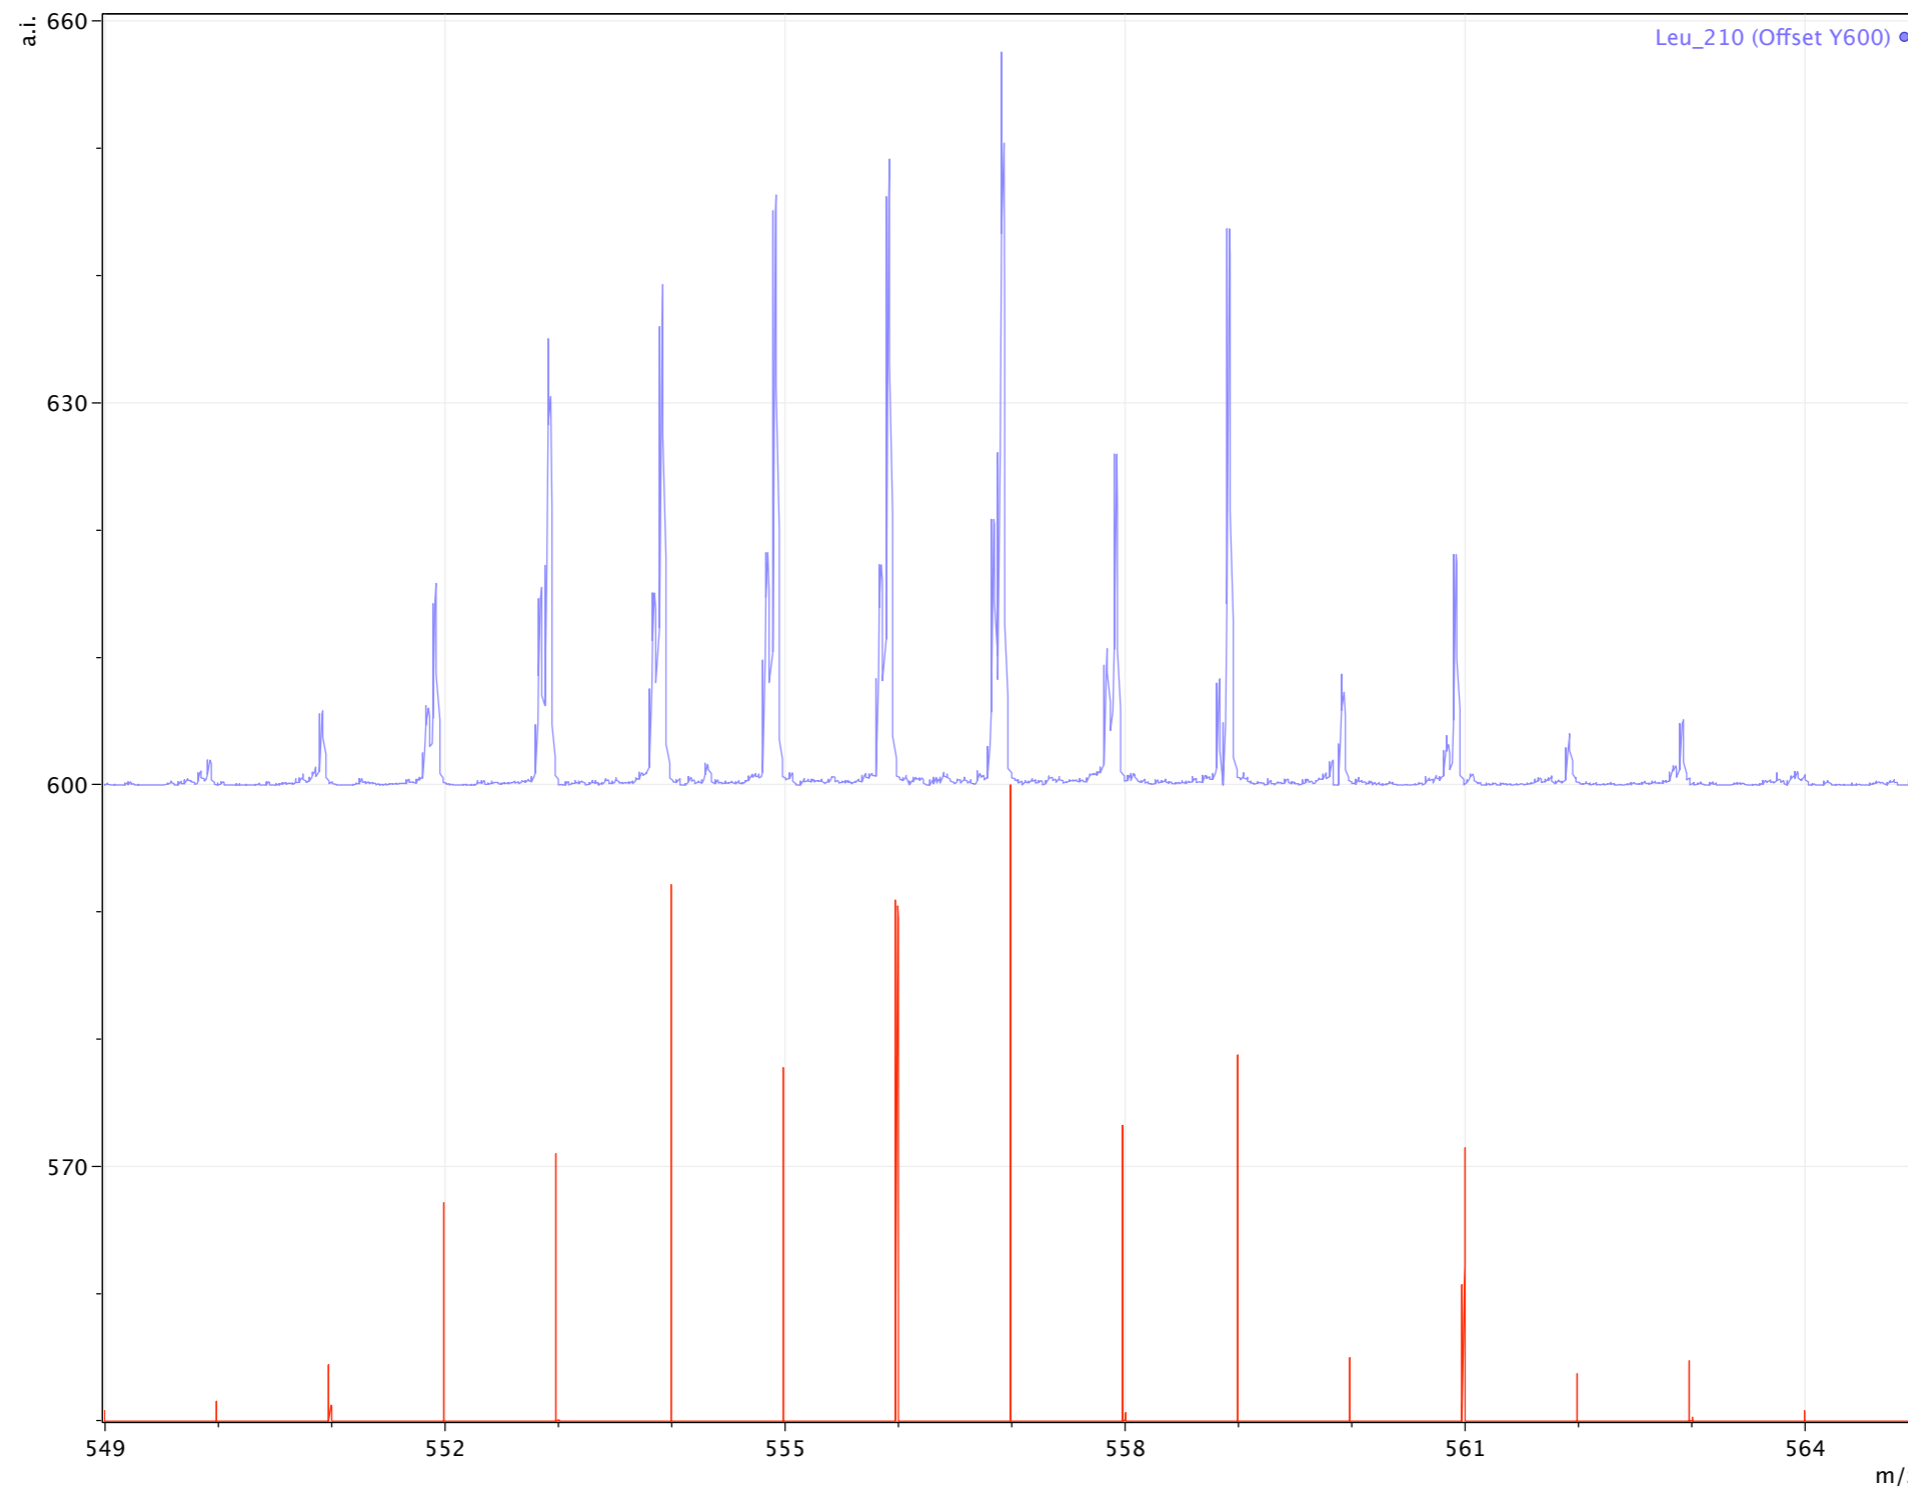

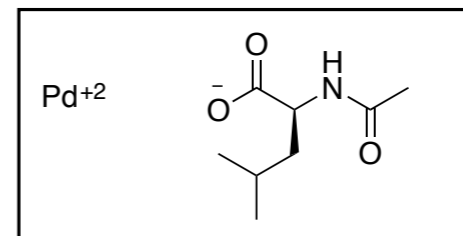

**S4.6.2**

**observed and theoretical isotope pattern for Pd MPAAs monomer**

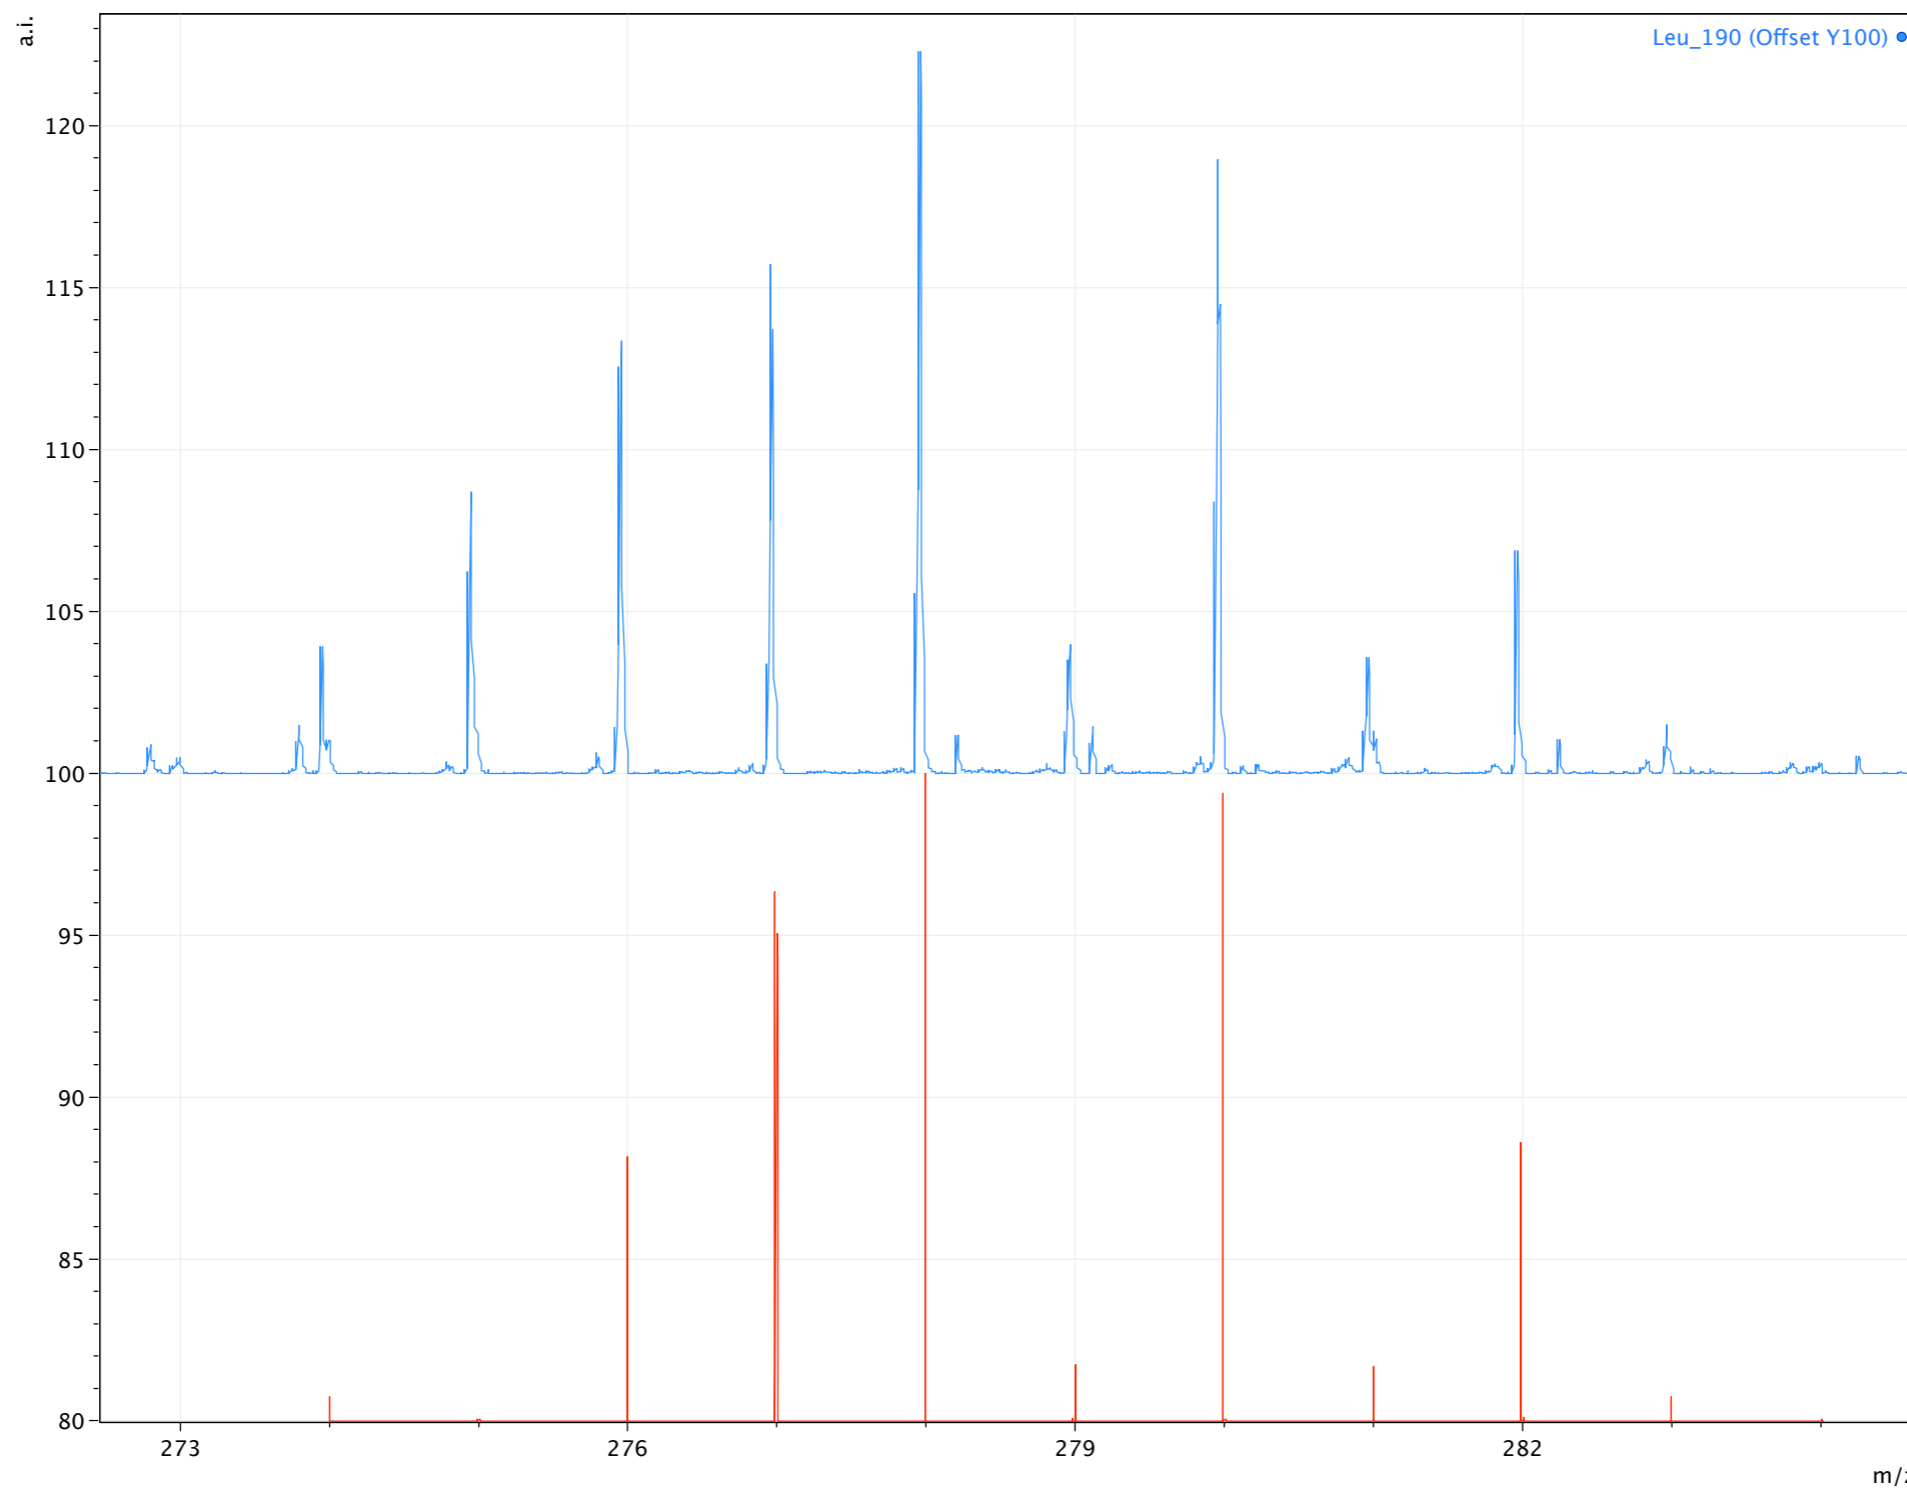

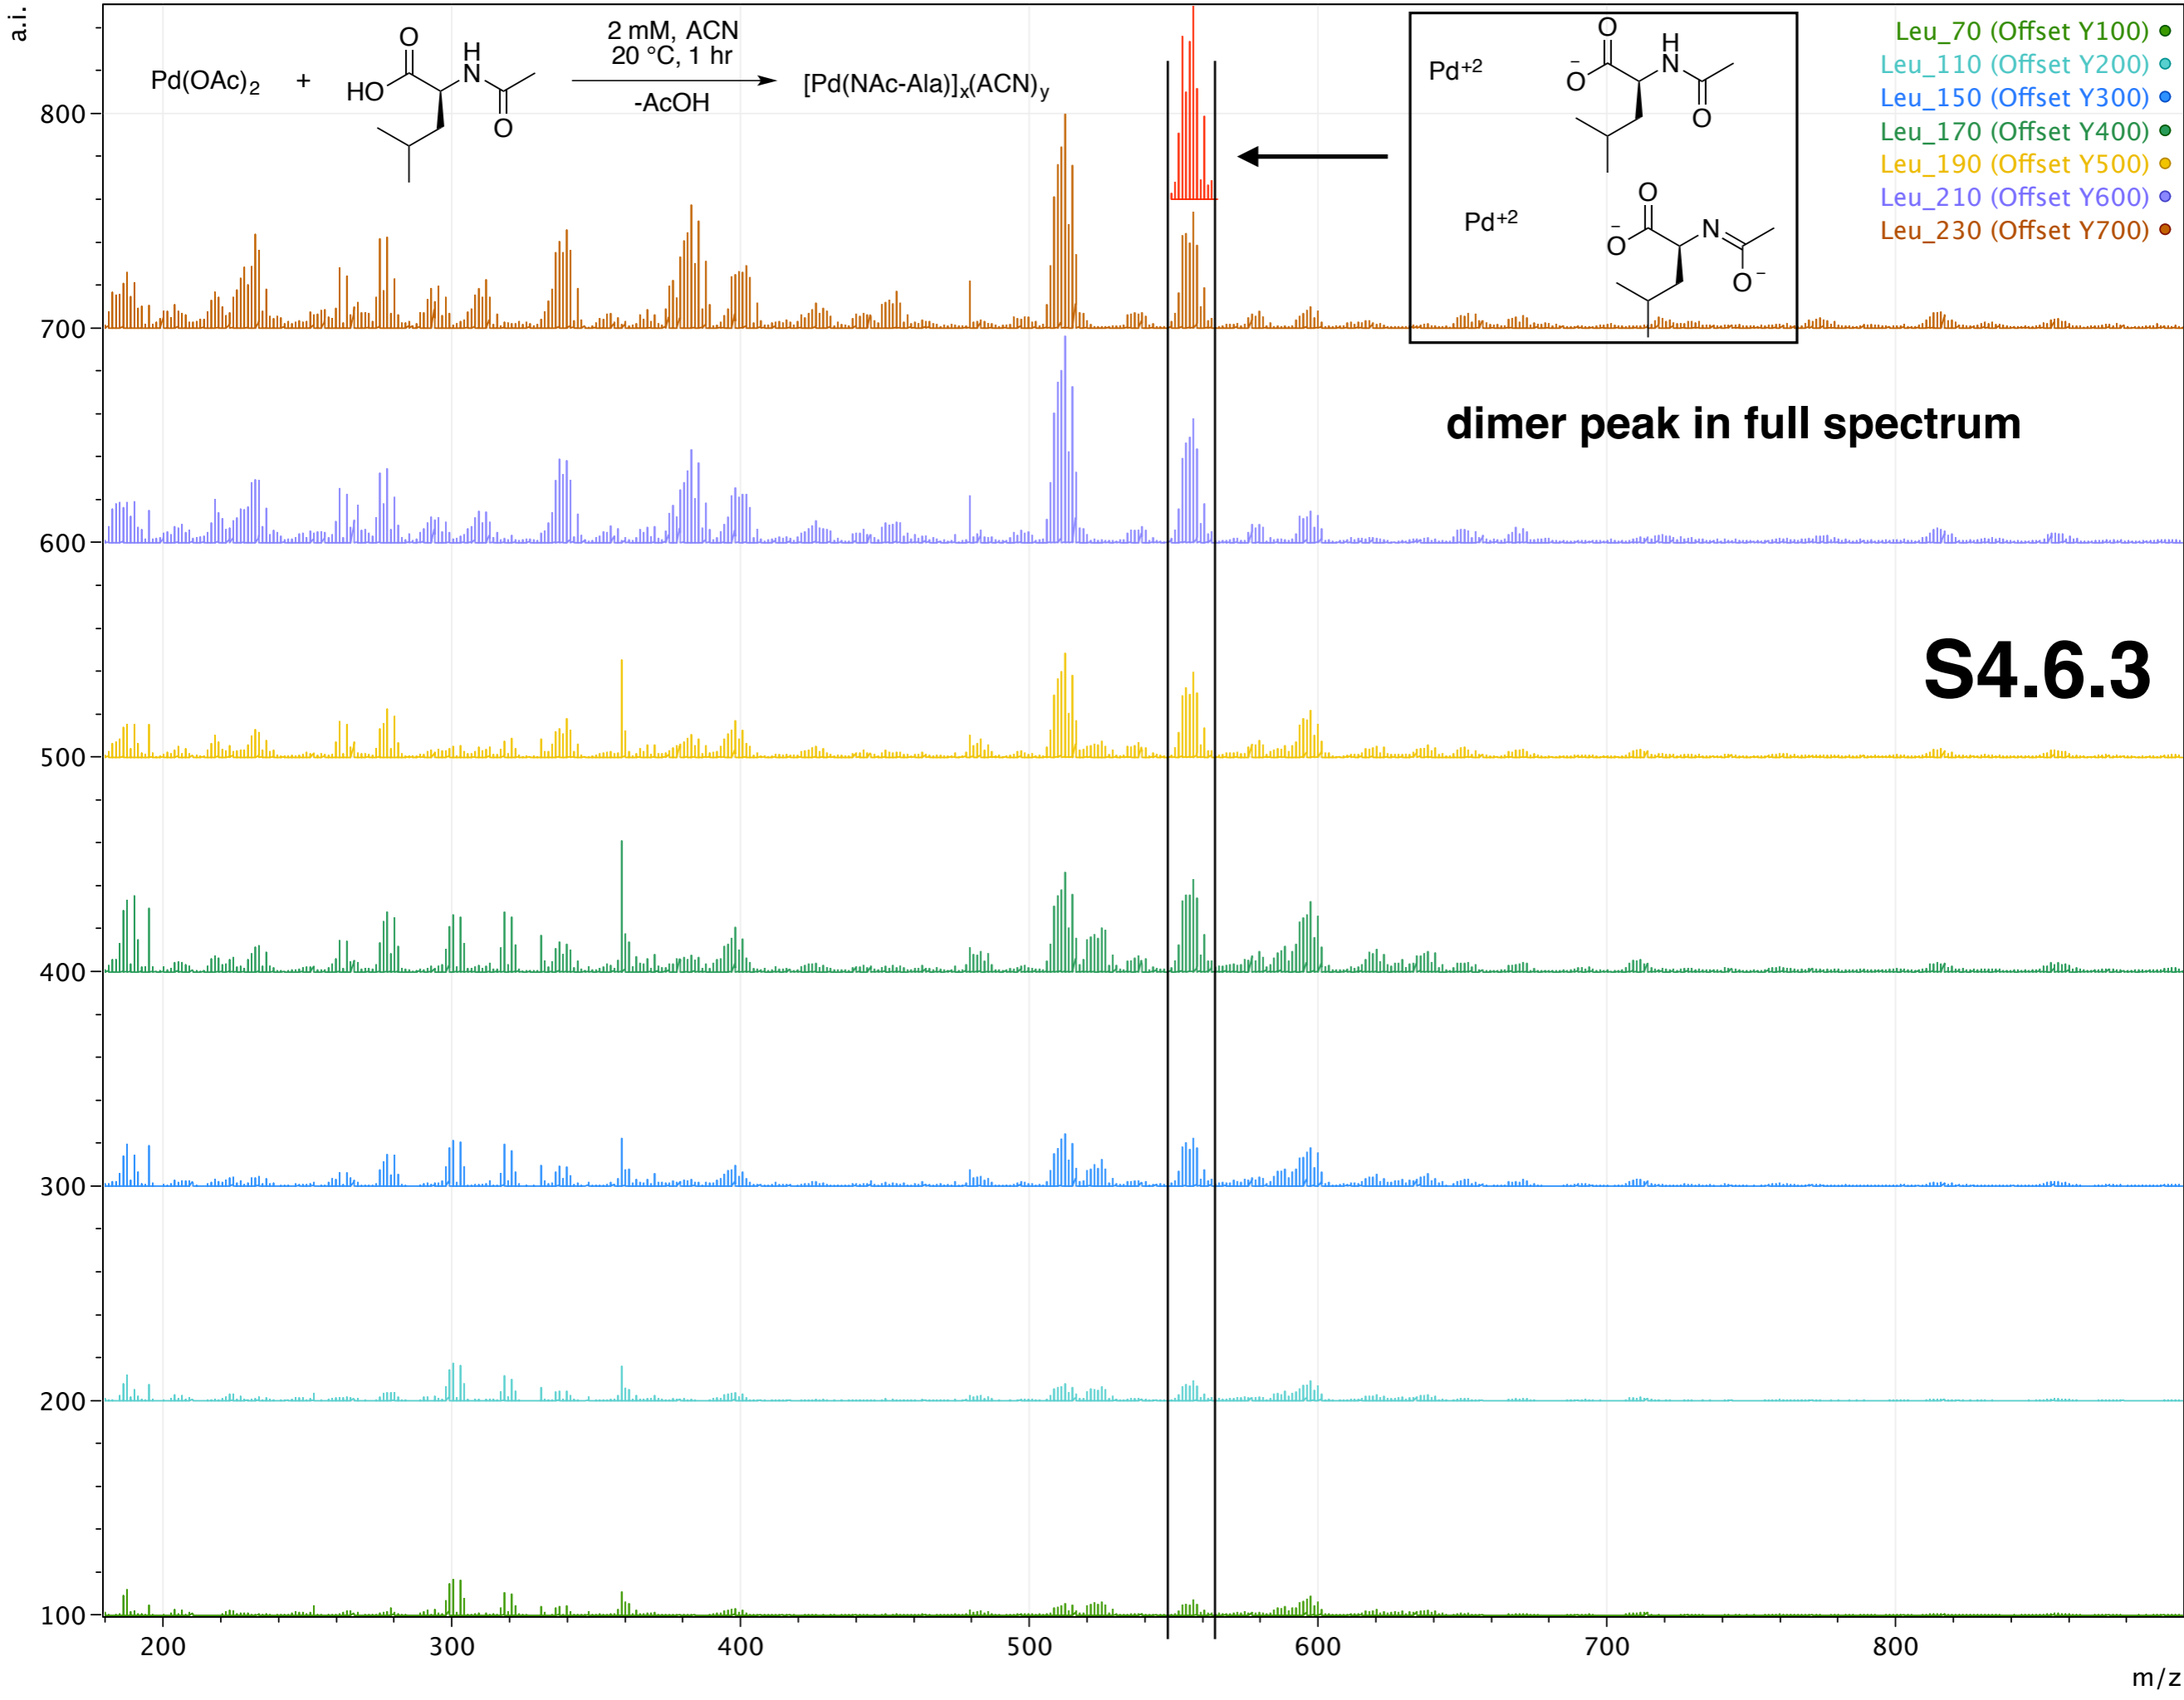

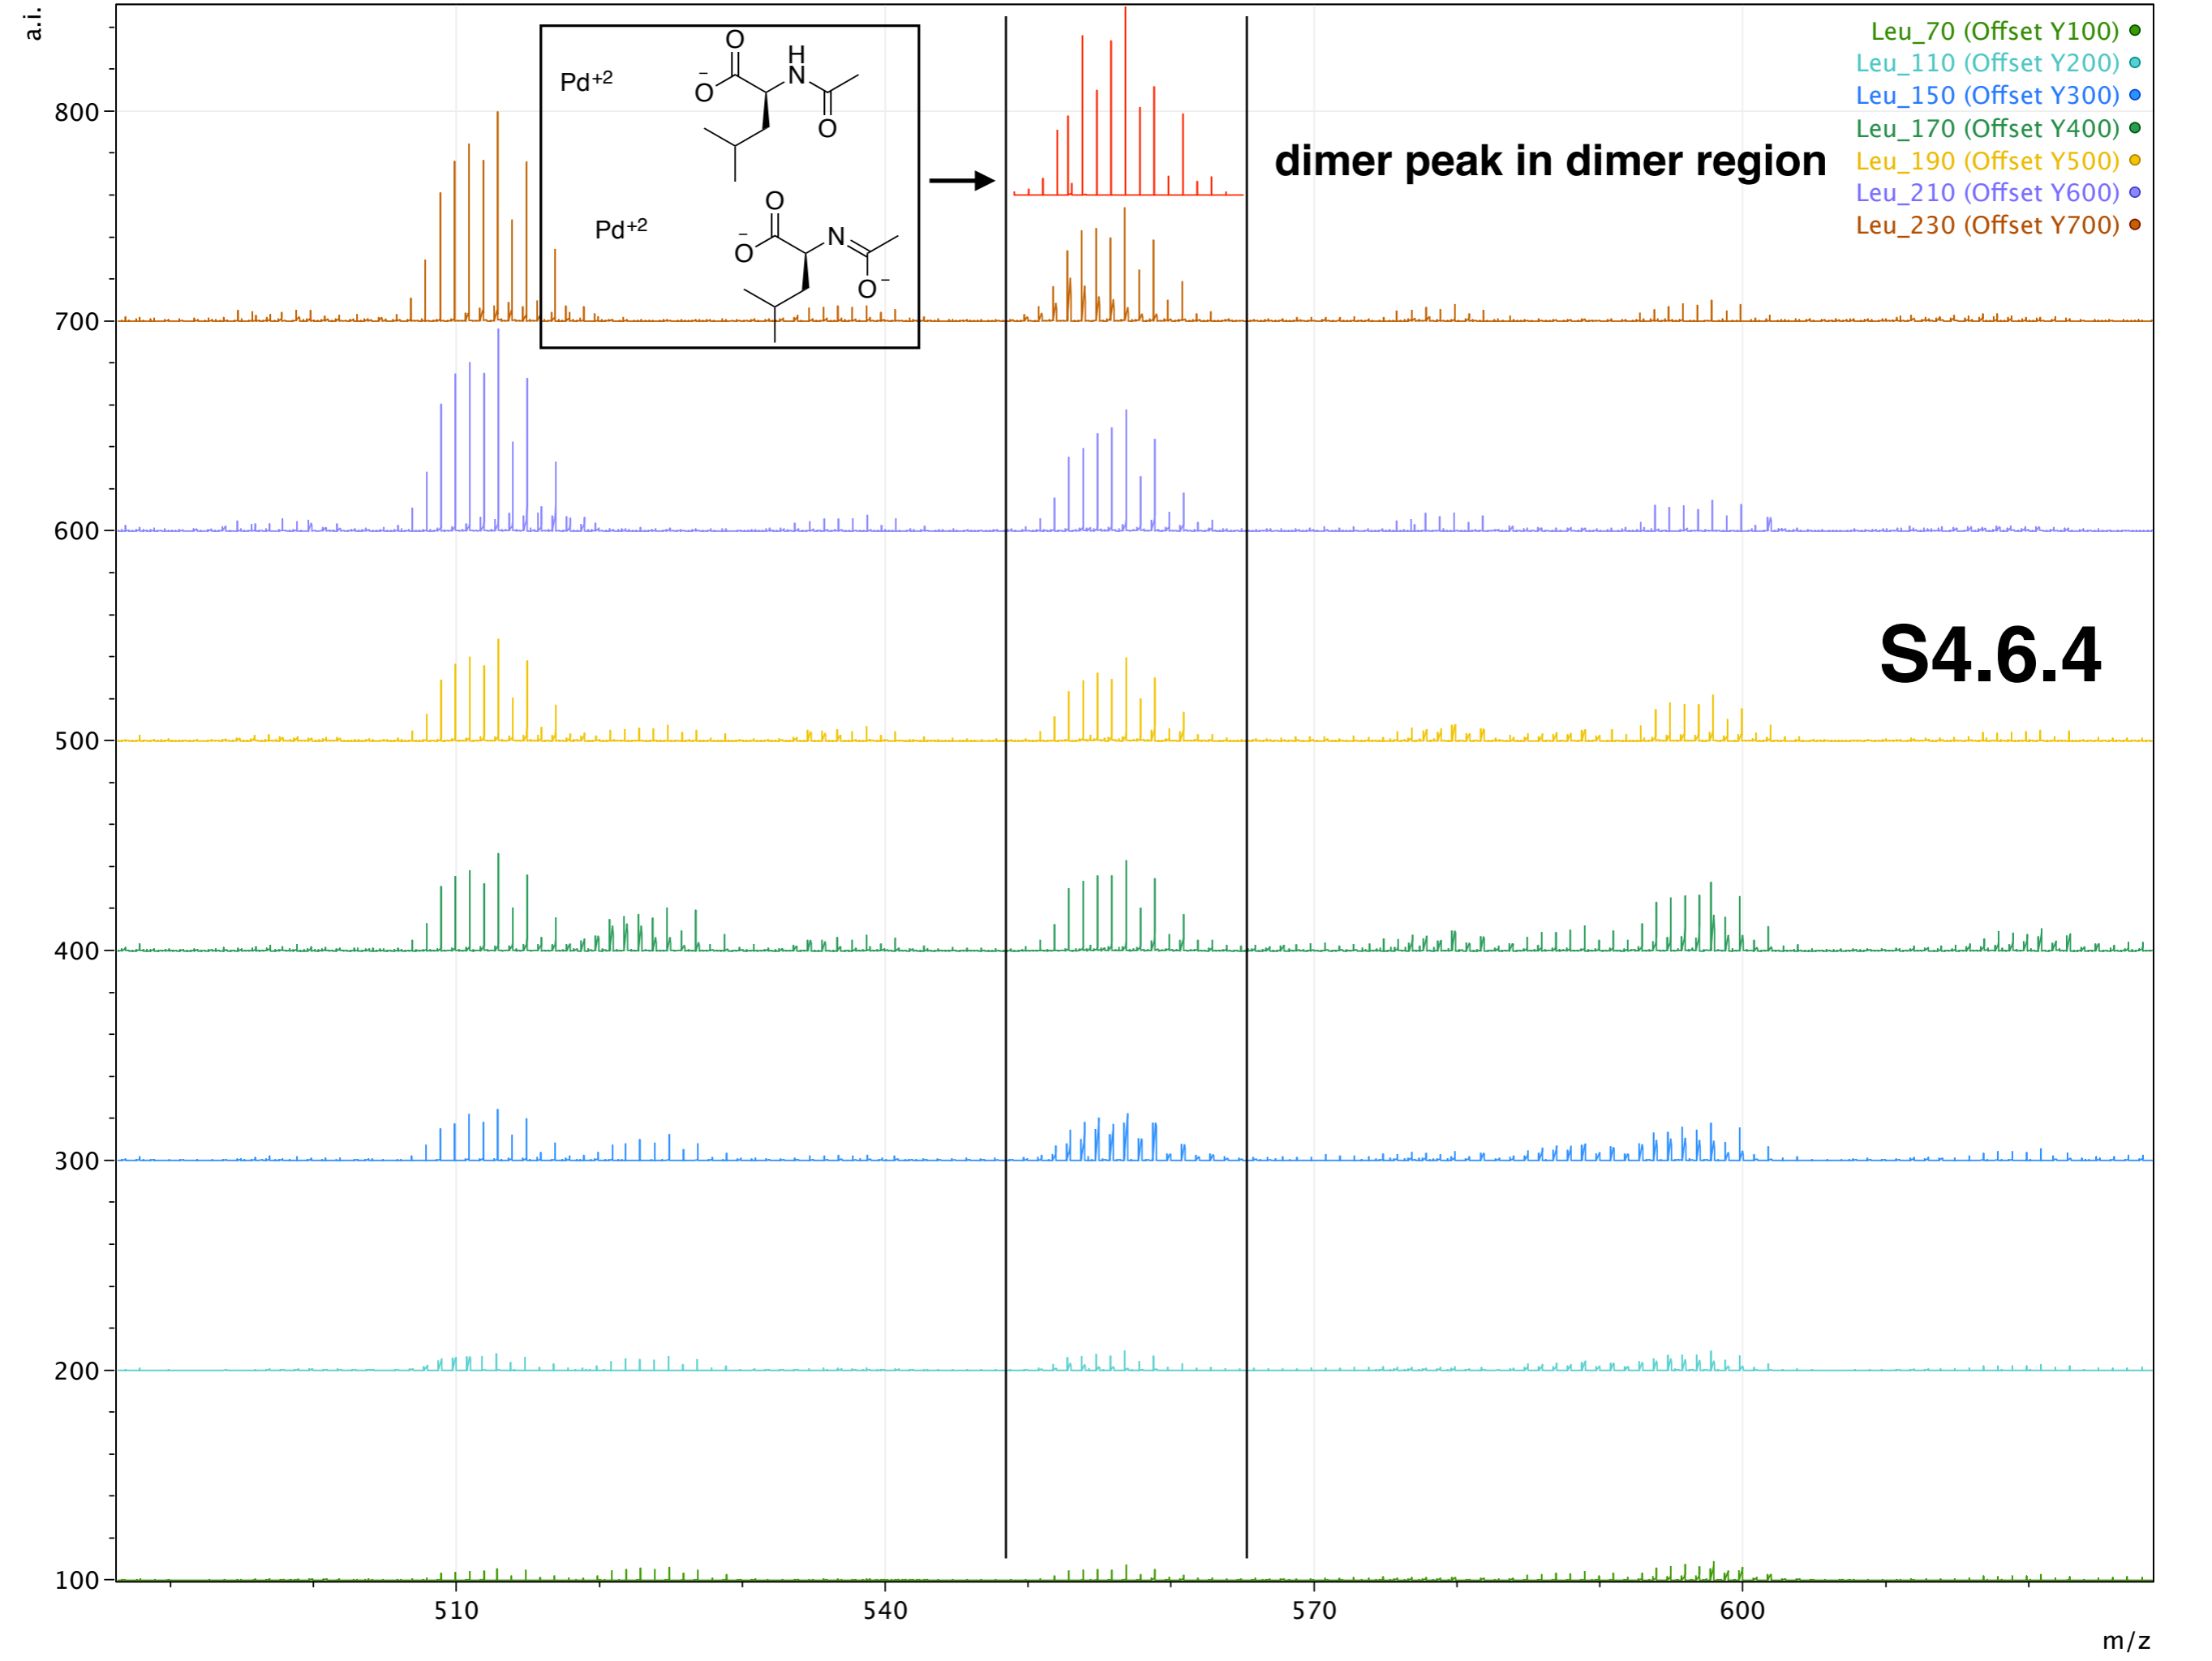

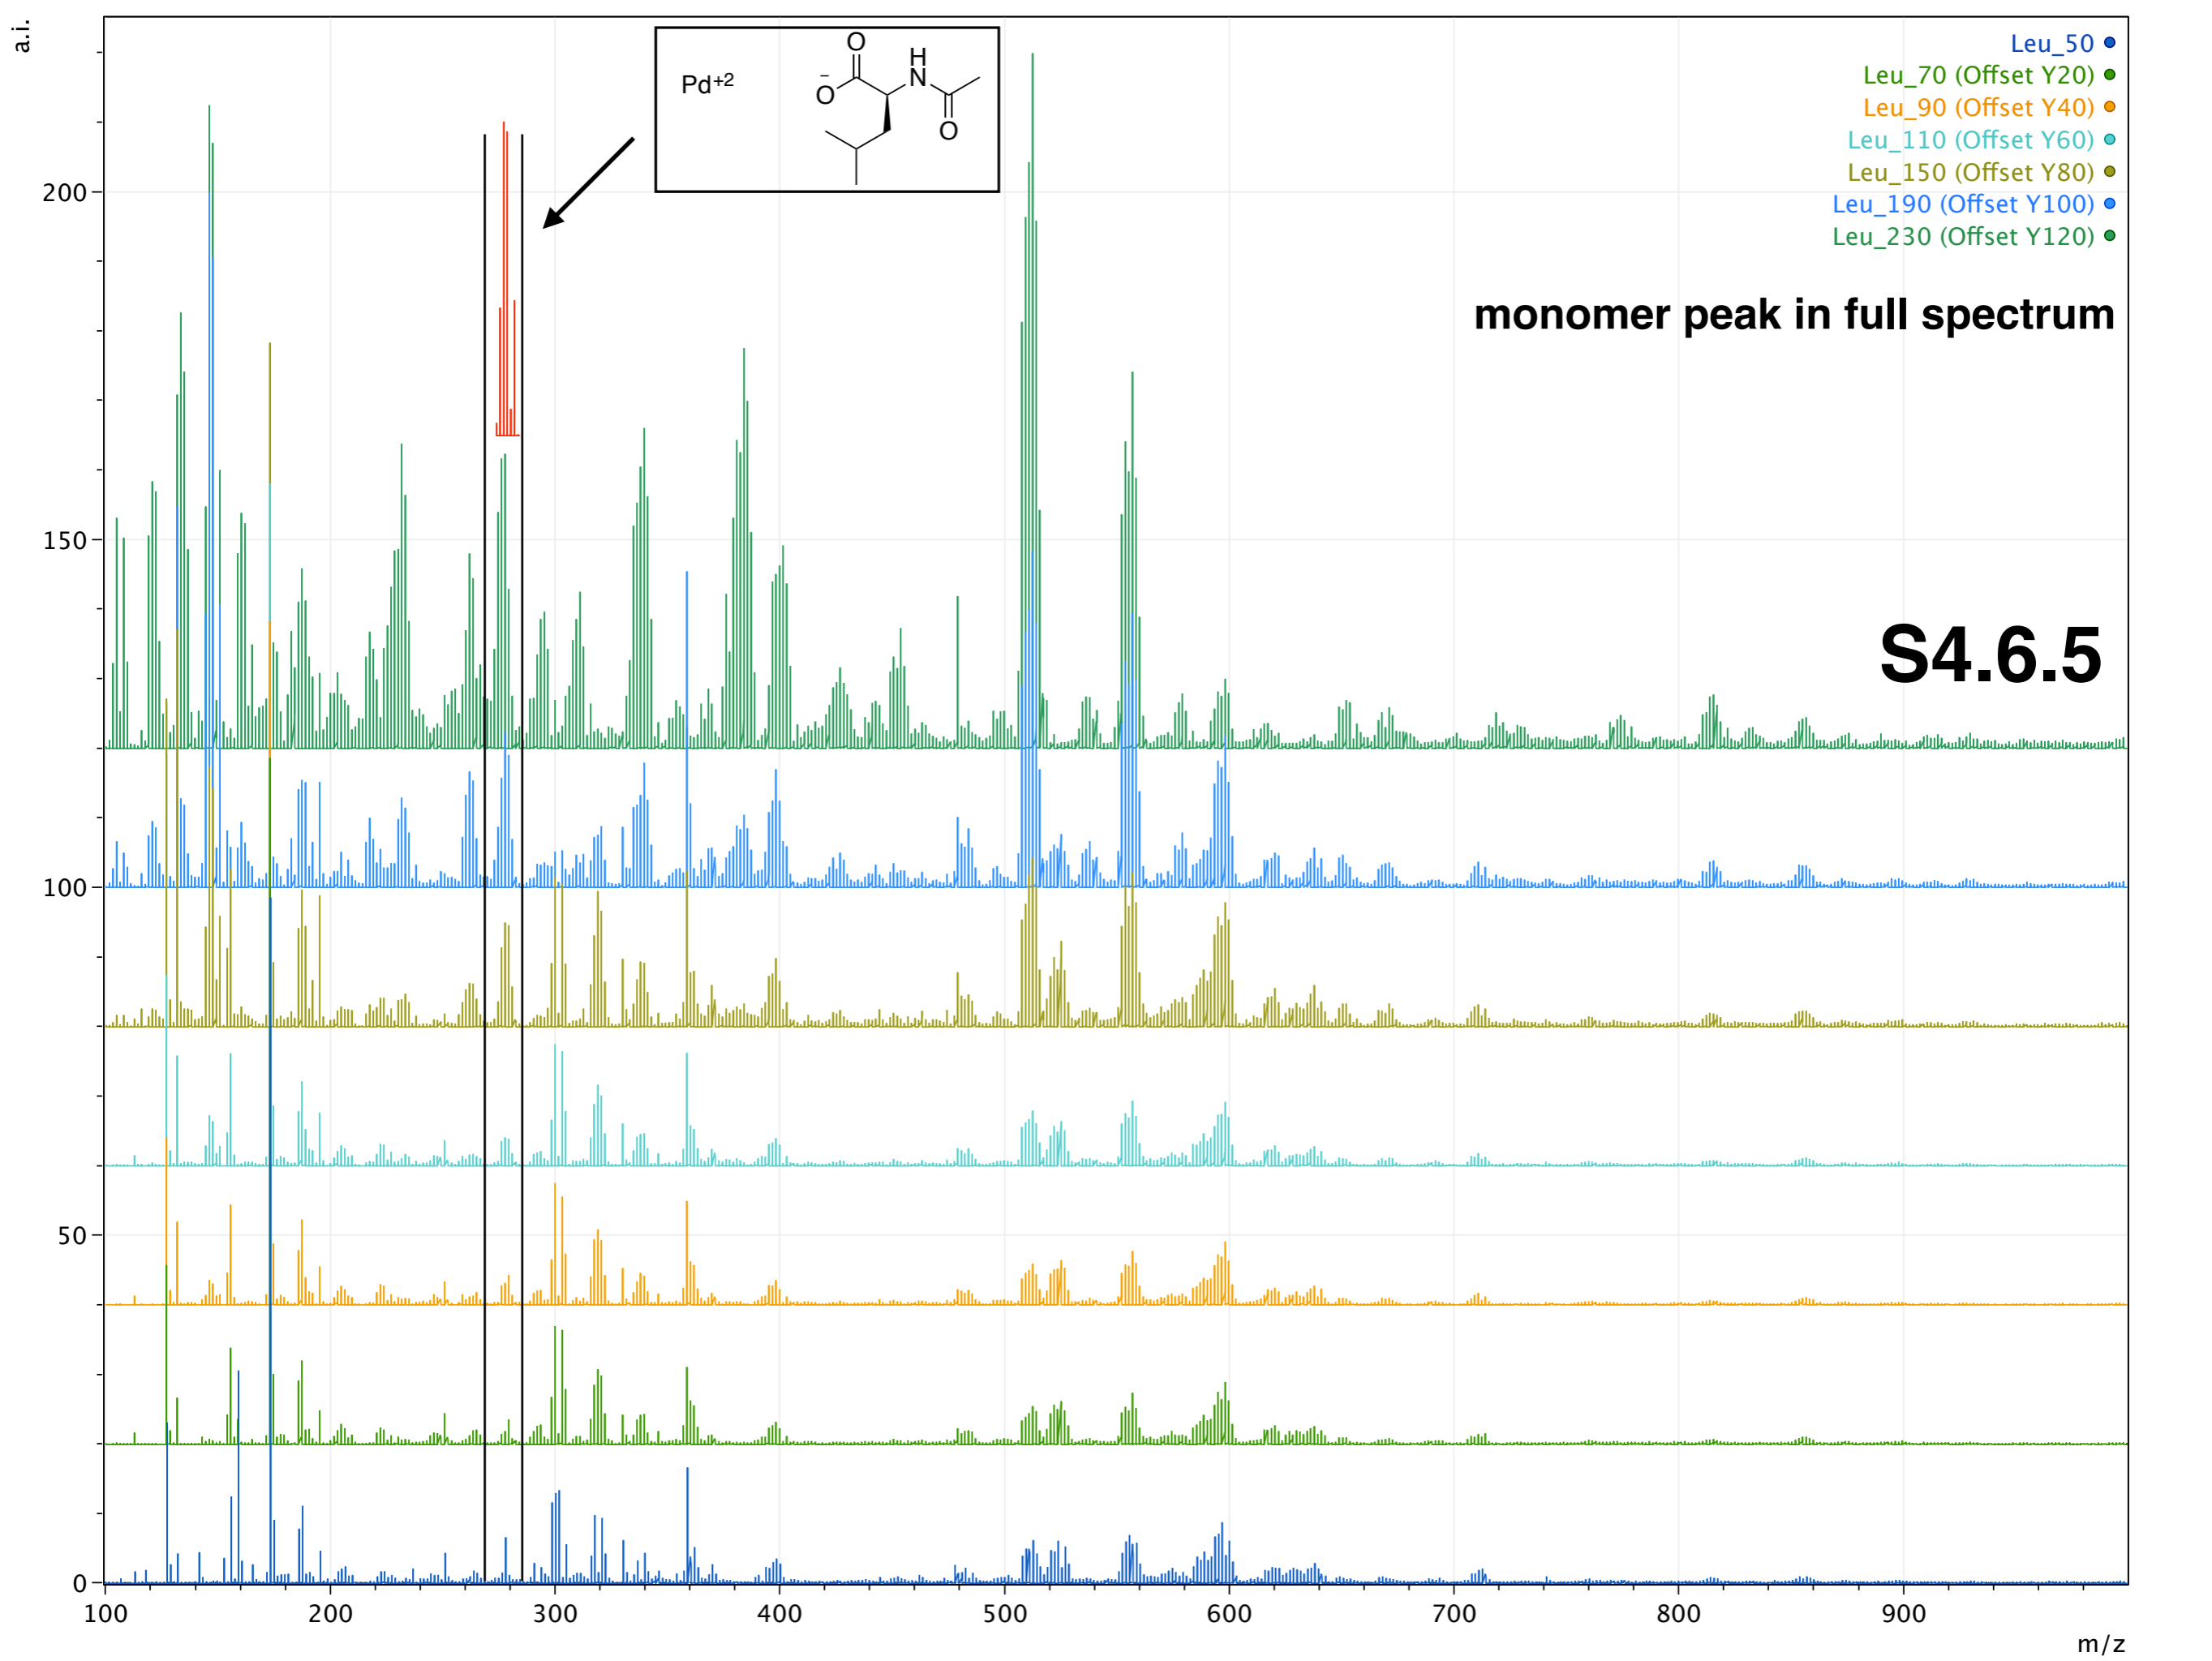



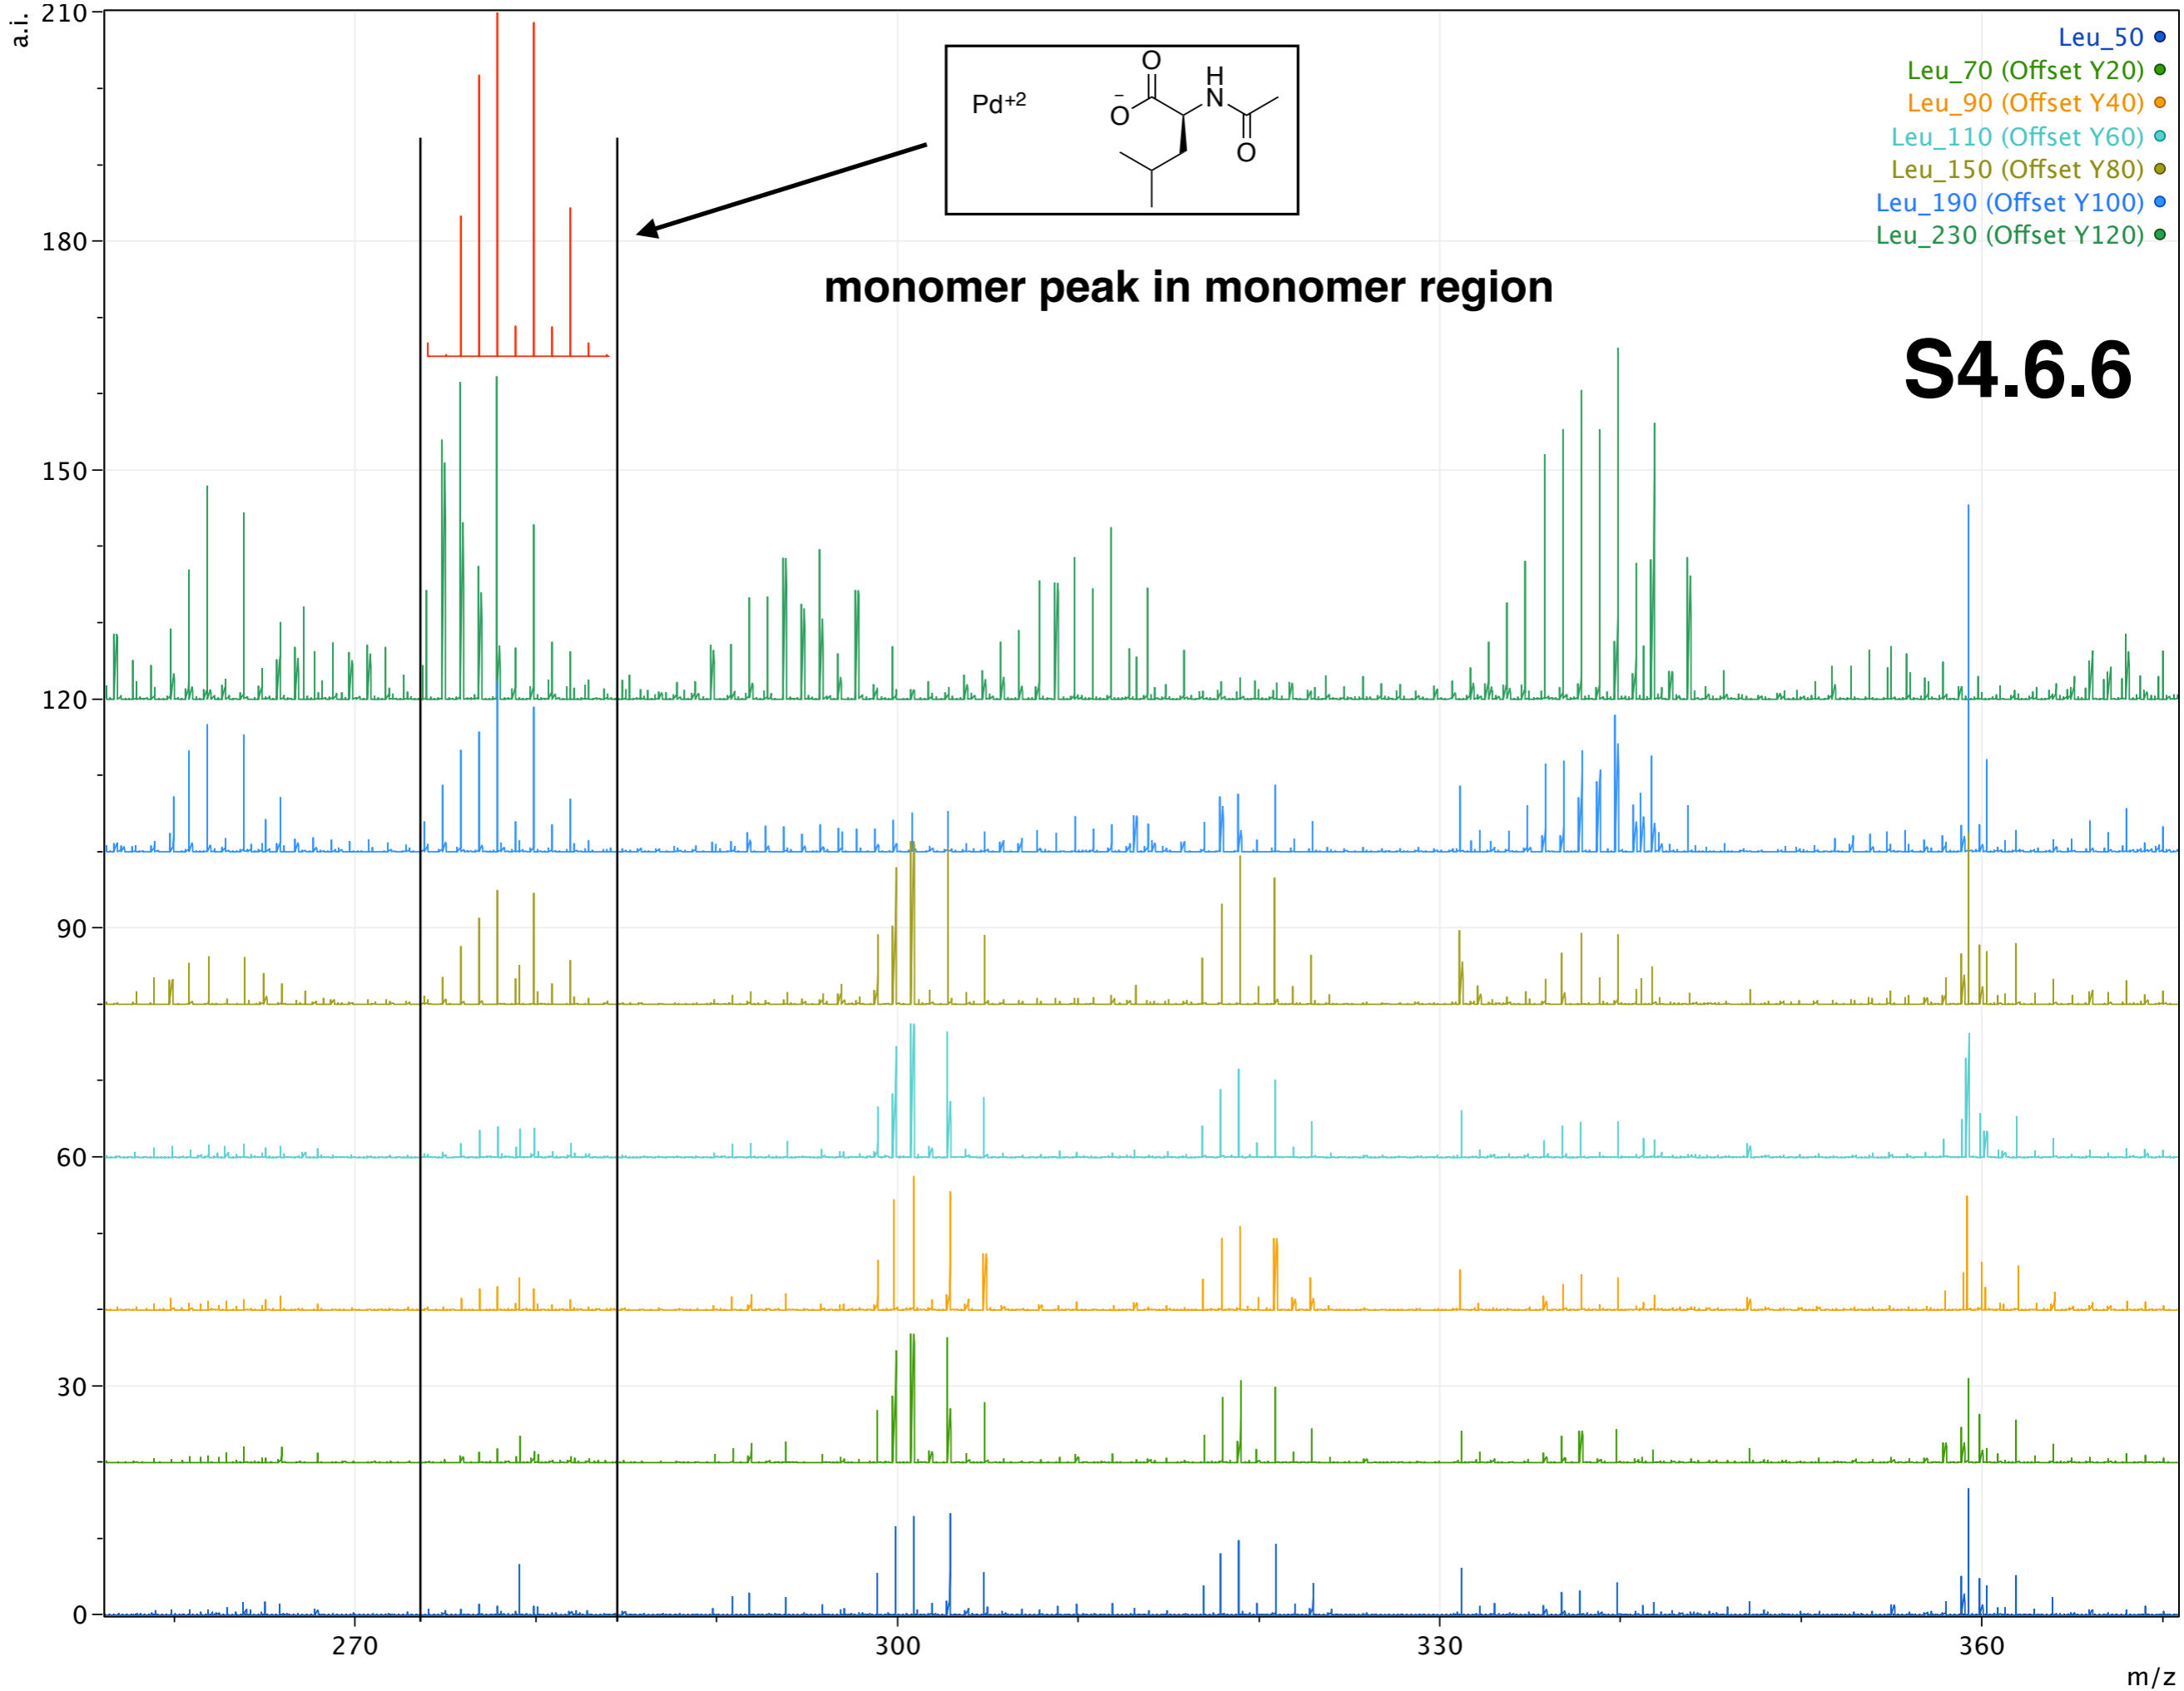

Supplement: SC-008-C7SC01674C-s003.pdf [file SC-008-C7SC01674C-s003.pdf]
