# Supplementary material for: Mono-N-protected amino acid ligands stabilize dimeric palladium(ii) complexes of importance to C–H functionalization
Source: PubMed Central journal article supplement — Chem Sci. 2017 Jun 16;8(8):5746–56. doi: 10.1039/c7sc01674c (PMC5859881; doi:10.1039/c7sc01674c), 2017-06-16
Supplement: SC-008-C7SC01674C-s005.pdf [file SC-008-C7SC01674C-s005.pdf]

## Supporting Information

### **Mono-*N*-Protected Amino Acid Ligands Stabilize Dimeric Palladium(II) Complexes of Importance to C-H Functionalization**

Joseph J. Gair,<sup>1</sup> Brandon E. Haines,<sup>2</sup> Alexander S. Filatov,<sup>1</sup> Djamaladdin G. Musaev,<sup>2\*</sup> and Jared C. Lewis<sup>1\*</sup>

<sup>1</sup>Department of Chemistry, The University of Chicago, Chicago Illinois, 60637, United States

<sup>2</sup>Cherry L. Emerson Center for Scientific Computation, Emory University, 1515 Dickey Drive, Atlanta  
Georgia 30322, United States

E-mail: jaredlewis@uchicago.edu , dmusaev@emory.edu

Supporting information 1 of 4: Synthesis, characterization, experimental details

Supporting information 2 of 4: Computational Analysis

Supporting information 3 of 4: Annotated NMR spectra

Supporting information 4 of 4: Annotated mass spectra

|                                                                                                 |           |
|-------------------------------------------------------------------------------------------------|-----------|
| <b>Section S1.0: Methods and Materials</b> .....                                                | <b>7</b>  |
| <b>Section S1.1: Synthesis of Pd(dmba) complexes</b> .....                                      | <b>8</b>  |
| Synthesis of [Pd(dmba)(OAc)] <sub>2</sub> (4) .....                                             | 8         |
| Synthesis of [Pd(dmba)(Cl)] <sub>2</sub> (S1) .....                                             | 8         |
| Synthesis of Pd(dmba)(acac) (S2) .....                                                          | 8         |
| Synthesis of [Pd(dmba)(NAC-Gly)] <sub>2</sub> (2) from S1 .....                                 | 8         |
| Synthesis of 2 by C-H activation .....                                                          | 9         |
| <b>Section S1.2: Synthesis of Pd(CF<sub>3</sub>-dmba) complexes</b> .....                       | <b>10</b> |
| Synthesis of [Pd(CF <sub>3</sub> -dmba)(OAc)] <sub>2</sub> (9) .....                            | 10        |
| Synthesis of [Pd(CF <sub>3</sub> -dmba)(NAC-Gly)] <sub>2</sub> (6a) .....                       | 10        |
| Synthesis of [Pd(CF <sub>3</sub> -dmba)(NAC-Ala)] <sub>2</sub> (6b) .....                       | 11        |
| Synthesis of [Pd(CF <sub>3</sub> -dmba)(NAC-Leu)] <sub>2</sub> (6c) .....                       | 12        |
| Synthesis of [Pd(CF <sub>3</sub> -dmba)(NAC-Ile)] <sub>2</sub> (6d) .....                       | 13        |
| Synthesis of [Pd(CF <sub>3</sub> -dmba)(Cl)] <sub>2</sub> (8) .....                             | 13        |
| Synthesis of Pd(CF <sub>3</sub> -dmba)(acac) (7) .....                                          | 14        |
| <b>Section S1.3: Synthesis of substrate and authentic standards</b> .....                       | <b>15</b> |
| Synthesis of CF <sub>3</sub> -dmba (5a) .....                                                   | 15        |
| Synthesis of Cl-CF <sub>3</sub> -dmba (5b) .....                                                | 15        |
| Synthesis of Br-CF <sub>3</sub> -dmba (5c) .....                                                | 16        |
| Synthesis of I-CF <sub>3</sub> -dmba (5d) .....                                                 | 16        |
| <b>Section S1.4: Attempted bridge splitting equilibrium experiments</b> .....                   | <b>17</b> |
| stacked <sup>19</sup> F NMR spectra .....                                                       | 17        |
| stacked <sup>1</sup> H NMR spectra .....                                                        | 18        |
| <b>Section S1.5: looking for species in equilibrium with MPAA complexes</b> .....               | <b>19</b> |
| variable concentration UV-vis of 6a in CH <sub>2</sub> Cl <sub>2</sub> .....                    | 19        |
| variable concentration <sup>19</sup> F NMR of 6b in CD <sub>2</sub> Cl <sub>2</sub> .....       | 20        |
| low temperature <sup>1</sup> H NMR of 6a in CD <sub>2</sub> Cl <sub>2</sub> .....               | 21        |
| high temperature <sup>1</sup> H NMR of 6a in 1,1,2,2-tetrachloroethane-d <sub>2</sub> .....     | 22        |
| high temperature <sup>19</sup> F NMR of 6a in 1,1,2,2-tetrachloroethane-d <sub>2</sub> .....    | 22        |
| <sup>1</sup> H NMR of homodimers 6a and 2 compared to mixture with heterodimer .....            | 23        |
| <sup>19</sup> F NMR reaction progress of equilibration homodimers 6a and 2 to heterodimer ..... | 23        |
| <b>Section S1.6: Pulse gradient spin echo experiments</b> .....                                 | <b>25</b> |
| PGSE experimental description .....                                                             | 25        |
| Table of PGSE results .....                                                                     | 25        |
| Plot of PGSE slopes .....                                                                       | 26        |
| <b>Section S1.7: Effect of MPAA and base on rate of cyclopalladation</b> .....                  | <b>27</b> |
| reaction summary .....                                                                          | 27        |
| experimental set up .....                                                                       | 27        |
| bar graph comparing initial rates of starting material consumption .....                        | 28        |
| bar graph comparing initial rates of product formation .....                                    | 28        |
| overlaid plots of reaction progress in initial rates portion of reaction .....                  | 28        |
| overlaid plots of reaction progress in first 60 minutes of reaction .....                       | 29        |
| overlaid plots of reaction progress over full reaction .....                                    | 29        |
| stacked spectra with no additive .....                                                          | 30        |
| stacked spectra with MPAA additive .....                                                        | 30        |
| stacked spectra with sodium acetate .....                                                       | 31        |
| stacked spectra with MPAA additive and sodium acetate .....                                     | 31        |
| <b>Section S1.8: Acetate/MPAA exchange equilibria</b> .....                                     | <b>32</b> |
| procedure for displacing acetate with MPAAAs .....                                              | 32        |

|                                                                                                            |           |
|------------------------------------------------------------------------------------------------------------|-----------|
| Figure S1.1: $^{19}\text{F}$ NMR comparison of acetate displaced by MPAA's .....                           | 32        |
| procedure for displacing NAc-Gly with acetate .....                                                        | 33        |
| comparing $^{19}\text{F}$ NMR spectra of forward and reverse carboxylate exchange.....                     | 33        |
| <b>Section S1.9: Scope of MPAA palladacycle functionalization .....</b>                                    | <b>34</b> |
| Iodination.....                                                                                            | 34        |
| Bromination .....                                                                                          | 35        |
| Relative rates of iodination and bromination .....                                                         | 36        |
| Figure S1.2: palladacycle bromination proceeds more rapidly than iodination .....                          | 36        |
| Chlorination with 2 equiv. oxidant .....                                                                   | 37        |
| Chlorination with 5 equiv. oxidant .....                                                                   | 37        |
| Olefination in trifluoroethanol .....                                                                      | 38        |
| Olefination in 1,2-dichloroethane .....                                                                    | 39        |
| <b>Section S1.10: Reaction of complex 2 with iodobenzene dichloride .....</b>                              | <b>40</b> |
| Reaction with 1.2 equiv. iodobenzene dichloride .....                                                      | 40        |
| Reaction progress by $^1\text{H}$ NMR.....                                                                 | 41        |
| Comparison of $^1\text{H}$ NMR of MPAA complex 2 with isolated mixture of 15a and 15b .....                | 41        |
| $^1\text{H}$ NMR of isolated 15a and 15b .....                                                             | 42        |
| Comparison of $^1\text{H}$ NMR of complex S1.1 with isolated mixture of 16a and 16b .....                  | 42        |
| $^1\text{H}$ NMR of 16a and 16b.....                                                                       | 43        |
| Reaction with 2.4 equiv. iodobenzene dichloride .....                                                      | 44        |
| $^1\text{H}$ NMR of reaction progress .....                                                                | 44        |
| $^1\text{H}$ NMR integrals used to determine yield .....                                                   | 45        |
| $^1\text{H}$ NMR of isolated 16b .....                                                                     | 45        |
| <b>Pd(II) catalyzed olefination of dmba .....</b>                                                          | <b>46</b> |
| experimental set up.....                                                                                   | 46        |
| Figures S1.3: bar graph of initial rates of olefination with different precatalysts .....                  | 46        |
| Figure S1.4: reaction progress initial rates region.....                                                   | 47        |
| Figure S1.5: full reaction profiles.....                                                                   | 47        |
| <b>Section S1.12: Palladium catalyzed olefination of <i>o</i>-CF<sub>3</sub>- phenyl acetic acid. ....</b> | <b>48</b> |
| experimental set up.....                                                                                   | 48        |
| Figure S1.6: reaction progress of aryl acetic acid olefination with different precatalysts .....           | 48        |
| <b>Section S1.13: Subsequent reaction of 5d in the presence of excess iodine .....</b>                     | <b>49</b> |
| Preliminary observation.....                                                                               | 49        |
| Stacked $^{19}\text{F}$ NMR of preliminary observation.....                                                | 49        |
| Integrated reaction profile of preliminary observation .....                                               | 49        |
| Experimental set up .....                                                                                  | 50        |
| reaction progress by $^1\text{H}$ NMR .....                                                                | 51        |
| Spectra before and after spiking independently synthesized 5d.....                                         | 51        |
| Stacked: mixture before vacuum transfer, non-volatiles, volatiles .....                                    | 52        |
| Integrated reaction mixture used to determine yield .....                                                  | 53        |
| HMQC volatiles .....                                                                                       | 54        |
| COSY reaction mixture non-volatiles .....                                                                  | 54        |
| $^1\text{H}$ NMR enriched mixture integrals consistent with formamidinium .....                            | 55        |
| COSY enriched mixture .....                                                                                | 55        |
| HMQC enriched mixture.....                                                                                 | 56        |
| <b>Section S1.14 Iodination Kinetics .....</b>                                                             | <b>57</b> |
| Saturation in exogenous iodide (30 mM I <sub>2</sub> ) .....                                               | 57        |
| plots of reaction progress in initial rates region .....                                                   | 57        |
| plot of initial rates vs [Bu <sub>4</sub> NI].....                                                         | 57        |
| Saturation in exogenous iodide (8 mM I <sub>2</sub> ) .....                                                | 58        |

|                                                                                                                                            |           |
|--------------------------------------------------------------------------------------------------------------------------------------------|-----------|
| plots of reaction progress in initial rates region .....                                                                                   | 58        |
| plot of initial rates vs [Bu <sub>4</sub> Nl] .....                                                                                        | 58        |
| Order in I <sub>2</sub> in the absence of exogenous I <sup>-</sup> .....                                                                   | 59        |
| plots of reaction progress .....                                                                                                           | 59        |
| plot of initial rate versus initial [I <sub>2</sub> ] .....                                                                                | 60        |
| Order in I <sub>2</sub> in the presence of exogenous I <sup>-</sup> .....                                                                  | 61        |
| plots of reaction progress .....                                                                                                           | 61        |
| plot of initial rate versus initial [I <sub>2</sub> ] .....                                                                                | 61        |
| Attempt to determine order in palladium by initial rates .....                                                                             | 62        |
| plot of initial rates versus initial [6b] .....                                                                                            | 62        |
| selected reaction profiles presented for clarity .....                                                                                     | 62        |
| <b>General Crystallographic Methods .....</b>                                                                                              | <b>63</b> |
| <b>Complex_2 .....</b>                                                                                                                     | <b>64</b> |
| molecular structure complex_2 with 50% ellipsoids .....                                                                                    | 64        |
| asymmetric unit complex_2 with 50% ellipsoids .....                                                                                        | 64        |
| unit cell complex_2 with hydrogen bonds .....                                                                                              | 65        |
| Table 1 Crystal data and structure refinement for complex_2 .....                                                                          | 66        |
| Table 2 Fractional Atomic Coordinates (×104) and Equivalent Isotropic Displacement Parameters (Å <sup>2</sup> ×103) for complex_2 .....    | 67        |
| Table 3 Anisotropic Displacement Parameters (Å <sup>2</sup> ×103) for complex_2 .....                                                      | 69        |
| Table 4 Bond Lengths for complex_2 .....                                                                                                   | 71        |
| Table 5 Bond Angles for complex_2 .....                                                                                                    | 73        |
| <b>Complex_6b .....</b>                                                                                                                    | <b>75</b> |
| asymmetric unit complex_6b with 40% ellipsoids .....                                                                                       | 75        |
| asymmetric unit complex_6b with co-crystallized, hydrogen bonding acetonitrile .....                                                       | 75        |
| unit cell complex_6b with hydrogen bonding network .....                                                                                   | 76        |
| Table 1 Crystal data and structure refinement for complex_6b .....                                                                         | 77        |
| Table 2 Fractional Atomic Coordinates (×104) and Equivalent Isotropic Displacement Parameters (Å <sup>2</sup> ×103) for complex_6b .....   | 78        |
| Table 3 Anisotropic Displacement Parameters (Å <sup>2</sup> ×103) for complex_6b .....                                                     | 80        |
| Table 4 Bond Lengths for complex_6b .....                                                                                                  | 82        |
| Table 5 Bond Angles for complex_6b .....                                                                                                   | 83        |
| <b>Complex_6a .....</b>                                                                                                                    | <b>85</b> |
| molecular structure complex_6a with 40% ellipsoids .....                                                                                   | 85        |
| asymmetric unit complex_6a with 40% ellipsoids .....                                                                                       | 85        |
| unit cell complex_6a with hydrogen bonding .....                                                                                           | 86        |
| Table 1 Crystal data and structure refinement for complex_6a .....                                                                         | 87        |
| Table 2 Fractional Atomic Coordinates (×104) and Equivalent Isotropic Displacement Parameters (Å <sup>2</sup> ×103) for complex_6a .....   | 88        |
| Table 3 Anisotropic Displacement Parameters (Å <sup>2</sup> ×103) for complex_6a .....                                                     | 90        |
| Table 4 Bond Lengths for complex_6a .....                                                                                                  | 92        |
| Table 5 Bond Angles for complex_6a .....                                                                                                   | 93        |
| <b>Complex_S5.1 .....</b>                                                                                                                  | <b>95</b> |
| complex_S5.1 with 50% ellipsoids .....                                                                                                     | 95        |
| complex_S5.1 with 50% ellipsoids and short contacts .....                                                                                  | 96        |
| Table 1 Crystal data and structure refinement for complex_S5.1 .....                                                                       | 97        |
| Table 2 Fractional Atomic Coordinates (×104) and Equivalent Isotropic Displacement Parameters (Å <sup>2</sup> ×103) for complex_S5.1 ..... | 98        |
| Table 3 Anisotropic Displacement Parameters (Å <sup>2</sup> ×103) for complex_S5.1 .....                                                   | 98        |
| Table 4 Bond Lengths for complex_S5.1 .....                                                                                                | 98        |
| Table 5 Bond Angles for complex_S5.1 .....                                                                                                 | 98        |



|                                                                                                                                                                |            |
|----------------------------------------------------------------------------------------------------------------------------------------------------------------|------------|
| <b>Complex_17</b> .....                                                                                                                                        | <b>99</b>  |
| molecular structure complex_17 with 40% ellipsoids.....                                                                                                        | 99         |
| unit cell complex_17 with 40% ellipsoids and short contacts.....                                                                                               | 99         |
| Table 1 Crystal data and structure refinement for complex_17 .....                                                                                             | 100        |
| Table 2 Fractional Atomic Coordinates ( $\times 10^4$ ) and Equivalent Isotropic Displacement Parameters ( $\text{\AA}^2 \times 10^3$ ) for complex_17.....    | 101        |
| Table 3 Anisotropic Displacement Parameters ( $\text{\AA}^2 \times 10^3$ ) for complex_17 .....                                                                | 101        |
| Table 4 Bond Lengths for complex_17 .....                                                                                                                      | 102        |
| Table 5 Bond Angles for complex_17 .....                                                                                                                       | 102        |
| <b>Complex_16</b> .....                                                                                                                                        | <b>103</b> |
| molecular structure complex_16 with 40% ellipsoids.....                                                                                                        | 103        |
| unit cell complex_16 with 30% ellipsoids .....                                                                                                                 | 103        |
| Table 1 Crystal data and structure refinement for complex_16 .....                                                                                             | 104        |
| Table 2 Fractional Atomic Coordinates ( $\times 10^4$ ) and Equivalent Isotropic Displacement Parameters ( $\text{\AA}^2 \times 10^3$ ) for complex_16.....    | 105        |
| Table 3 Anisotropic Displacement Parameters ( $\text{\AA}^2 \times 10^3$ ) for complex_16 .....                                                                | 105        |
| Table 4 Bond Lengths for complex_16 .....                                                                                                                      | 106        |
| Table 5 Bond Angles for complex_16 .....                                                                                                                       | 106        |
| <b>Complex_6c</b> .....                                                                                                                                        | <b>107</b> |
| NAC-Leu and primary coordination sphere with 30% ellipsoids .....                                                                                              | 107        |
| molecular structure complex_6c with 30% ellipsoids on MPAA; dmBa disorder masked .....                                                                         | 107        |
| molecular structure complex_6c with disorder over dmBa shown.....                                                                                              | 108        |
| unit cell_6c with hydrogen bonding emphasized and dmBa disorder masked .....                                                                                   | 108        |
| Table 1 Crystal data and structure refinement for complex_6c.....                                                                                              | 109        |
| Table 2 Fractional Atomic Coordinates ( $\times 10^4$ ) and Equivalent Isotropic Displacement Parameters ( $\text{\AA}^2 \times 10^3$ ) for complex_6c.....    | 110        |
| Table 3 Anisotropic Displacement Parameters ( $\text{\AA}^2 \times 10^3$ ) for complex_6c.....                                                                 | 112        |
| Table 4 Bond Lengths for complex_6c.....                                                                                                                       | 113        |
| Table 5 Bond Angles for complex_6c. ....                                                                                                                       | 114        |
| <b>Complex_S1.4</b> .....                                                                                                                                      | <b>116</b> |
| molecular structure complex_S1.4 with 30% ellipsoids .....                                                                                                     | 116        |
| organic formamidinium fragment in complex_S1.4 with 50% ellipsoids.....                                                                                        | 116        |
| inorganic iodopalladate fragment in complex_S1.4 with 50% ellipsoids .....                                                                                     | 117        |
| unit cell complex_S1.4 with 30% ellipsoids.....                                                                                                                | 117        |
| iodine/iodide networks in complex_S1.4.....                                                                                                                    | 118        |
| Table 1 Crystal data and structure refinement for complex_S1.4 .....                                                                                           | 119        |
| Table 2 Fractional Atomic Coordinates ( $\times 10^4$ ) and Equivalent Isotropic Displacement Parameters ( $\text{\AA}^2 \times 10^3$ ) for complex_S1.4. .... | 120        |
| Table 3 Anisotropic Displacement Parameters ( $\text{\AA}^2 \times 10^3$ ) for complex_S1.4 .....                                                              | 121        |
| Table 4 Bond Lengths for complex_S1.4.....                                                                                                                     | 123        |
| Table 5 Bond Angles for complex_S1.4.....                                                                                                                      | 124        |
| <b>Complex_15</b> .....                                                                                                                                        | <b>126</b> |
| molecular structure complex_15 with 40% ellipsoids.....                                                                                                        | 126        |
| asymmetric unit complex_15 with 40% ellipsoids .....                                                                                                           | 126        |
| unit cell complex_15 with hydrogen bonding network.....                                                                                                        | 127        |
| Table 1 Crystal data and structure refinement for complex_15 .....                                                                                             | 128        |
| Table 2 Fractional Atomic Coordinates ( $\times 10^4$ ) and Equivalent Isotropic Displacement Parameters ( $\text{\AA}^2 \times 10^3$ ) for complex_15.....    | 128        |
| Table 3 Anisotropic Displacement Parameters ( $\text{\AA}^2 \times 10^3$ ) for complex_15 .....                                                                | 130        |
| Table 4 Bond Lengths for complex_15 .....                                                                                                                      | 131        |
| Table 5 Bond Angles for complex_15 .....                                                                                                                       | 131        |

**References ..... 133**

## Section S1.0: Methods and Materials

All commercially available reagents were used as received unless otherwise noted. Mono-protected amino acids were purchased from Chem-Impex. Thallium acetylacetonate (acac) was purchased from Strem. Palladium(II) acetate was purchased from Pressure Chemical. 2-(trifluoromethyl)phenyl acetic acid was purchased from TCI. 2-(trifluoromethyl)benzyl bromide was purchased from Matrix Scientific. *N,N*-dimethylbenzylamine was purchased from Acros. 1,4-bis(trifluoromethyl)benzene were purchased from Alfa-Aesar. Iodobenzene dichloride was prepared by a reported procedure.<sup>1</sup>

All preparative reactions were conducted under air with solvents stored in air except where noted. In instances where anhydrous solvents were used, they were obtained from an Inert solvent purification system (1 hour sparge with nitrogen followed by passage over two columns of activated alumina).  $\text{CD}_2\text{Cl}_2$  and  $\text{CDCl}_3$  were dried by stirring over  $\text{CaH}_2$  under nitrogen overnight followed by vacuum transfer into a Teflon sealed container and three cycles of freeze pump thaw. NMR tube reactions were set up in an inert atmosphere glovebox under circulating nitrogen either in a J. Young tube or an NMR tube with a rubber septum.

NMR spectra were acquired on a Bruker DRX-500 MHz spectrometer at ambient temperature unless otherwise specified. Chemical shifts are reported in ppm and coupling constants are reported in Hz. MPAA complexes with chiral MPAA's exist as nearly equal mixture of diastereomers in solution. Each of these mixtures had several baseline separated  $^1\text{H}$  and  $^{13}\text{C}$  resonances which enabled assignment of the connectivity of the MPAA and substrate fragments; however, the absolute stereochemistry each of the diastereomers could not be assigned by NMR. As such, each  $^1\text{H}$  and  $^{13}\text{C}$  signal is annotated by its connectivity rather than absolute stereochemistry in the spectra and chemical shifts listed below and more upfield of the two diastereomeric resonances is labeled with an apostrophe in the naming scheme below. Moreover, each annotated spectra is accompanied by a chemdraw representation of one of the two diastereomers for simplicity.

All NMR tube kinetics reactions were set up in dried degassed solvents in an inert atmosphere glovebox with stock solutions prepared in volumetric flasks and dispensed with gas tight syringes. In order to obtain kinetic data as near to the start of the reaction as possible, samples were prepared without palladium inside the glovebox, one sample was removed from the glovebox with a gas tight syringe containing the appropriate volume of the palladium stock solution. The sample was brought to the NMR spectrometer, locked, shimmed, ejected from the spectrometer, injected with the palladium stock solution through a rubber septum, shaken vigorously, lowered into the spectrometer, and data acquisition began as soon as a stable lock signal was obtained (typically less than 40 seconds after injection).

## Section S1.1: Synthesis of Pd(dmmba) complexes

### Synthesis of [Pd(dmmba)(OAc)]<sub>2</sub> (**4**)

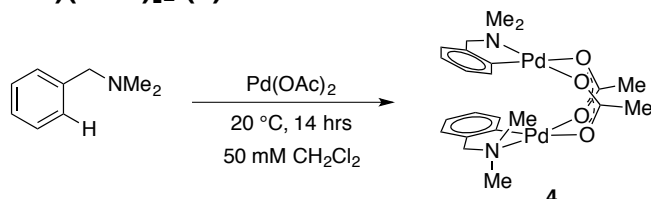

**4** [Pd(dmmba)(OAc)]<sub>2</sub> was prepared by a reported procedure<sup>2</sup> to give yellow crystals which matched the reported <sup>1</sup>H NMR of **4** [Pd(dmmba)(OAc)]<sub>2</sub>.

Jones, T. C.; Nielson, A. J.; Rickard, C. E. *Australian Journal of Chemistry* **1984**, *37*, 2179.

### Synthesis of [Pd(dmmba)(Cl)]<sub>2</sub> (**S1**)

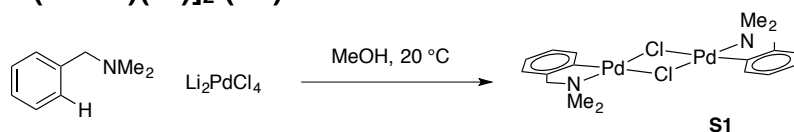

**S1** [Pd(dmmba)(Cl)]<sub>2</sub> was prepared by a reported procedure<sup>3,4</sup> to give a yellow powder which matched the <sup>1</sup>H NMR of **S1** [Pd(dmmba)(Cl)]<sub>2</sub>.

Cope, A. C.; Friedrich, E. C. *J. Am. Chem. Soc.* **1968**, *90* (4), 909.

Pfeffer, M. *Inorganic Syntheses* **1989**, *26*, 211.

### Synthesis of Pd(dmmba)(acac) (**S2**)

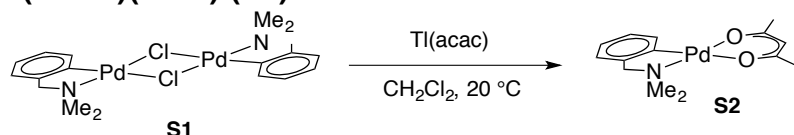

**S2** Pd(dmmba)(acac) was prepared by a reported procedure<sup>5</sup> to give a yellow powder which matched the <sup>1</sup>H NMR of **S2** Pd(dmmba)(acac).

Diaz-de-Villegas. *Journal of Organometallic Chemistry* **1995**, *490*, 35.

### Synthesis of [Pd(dmmba)(Nac-Gly)]<sub>2</sub> (**2**) from **S1**

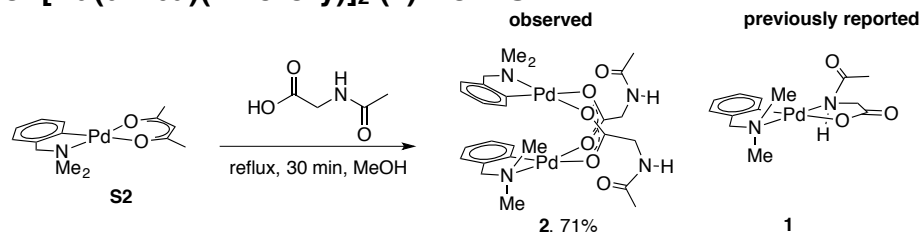

Complex **2** was prepared by a known procedure,<sup>5</sup> in which the products were assigned as the monomeric complex **1**. When the procedure was repeated, a complex with <sup>1</sup>H and <sup>13</sup>C NMR spectra matching those reported in the literature was obtained, but extensive characterization revealed that the structure in solution is **2**. Single crystals of complex **2** were obtained vapor diffusion of diethyl ether into a concentrated of **2** in CH<sub>2</sub>Cl<sub>2</sub> at 4 °C.

Diaz-de-Villegas. *Journal of Organometallic Chemistry* **1995**, *490*, 35.

## Synthesis of **2** by C-H activation

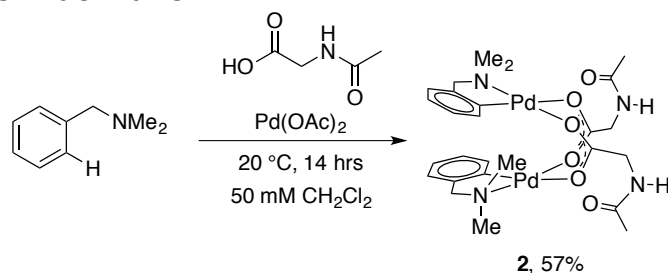

A 20 mL scintillation vial was charged with NAc-Gly (0.65 mmol, 76.1 mg, 1 equiv.), a stir bar, and 10 mL of methanol. The solution was stirred until the MPAA dissolved completely. To the MPAA solution was added solid Pd(OAc)<sub>2</sub> (0.65 mmol, 150 mg, 1 equiv.) and a solution of dmba (90 mg, 0.65 mmol, 1 equiv.) in 3 mL MeOH. The orange suspension gradually turned to a yellow solution and developed the smell of acetic acid. The solution was stirred for 14 hours at room temperature after which a 200  $\mu$ L aliquot was concentrated in vacuo and analyzed by <sup>1</sup>H NMR which revealed complete consumption of starting material and a 3:1 mixture of the desired product and a mixed MPAA/acetate complex. The remaining methanol solution was concentrated in vacuo and suspended in 3 mL toluene to azeotropically remove residual acetic acid in vacuo. The yellow solids were washed on a medium frit with 3x3 mL diethyl ether to remove any remaining free acetic acid. The yellow solids were washed through the frit with 5x2 mL CH<sub>2</sub>Cl<sub>2</sub> to remove any NAc-Gly. The CH<sub>2</sub>Cl<sub>2</sub> solution was concentrated to 5 mL, layered with 10 mL of diethyl ether, and stored over night at 4 °C. Decanting the supernatant afforded yellow solids that were not pure, but enriched in **2** by <sup>1</sup>H NMR. The enriched yellow solids were washed over a 1 cm pad of celite in a Pasteur pipette with 5x1 mL CH<sub>2</sub>Cl<sub>2</sub>, layered with 10 mL diethyl ether, and stored over night at 4 °C. The supernatant was decanted to afford 55.4 mg (23% yield) of pure **2** which matched the reported <sup>1</sup>H and <sup>13</sup>C NMR. The supernatant was concentrated by slow evaporation and layered with diethyl ether to afford an additional 77.1 mg of pure material to give a total of 132.5 mg (57% yield).

## Section S1.2: Synthesis of Pd(CF<sub>3</sub>-dmba) complexes

### Synthesis of [Pd(CF<sub>3</sub>-dmba)(OAc)]<sub>2</sub> (9)

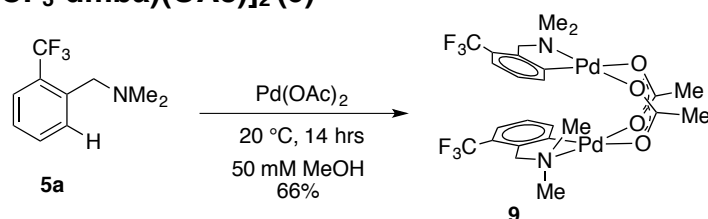

Pd(OAc)<sub>2</sub> (112 mg, 0.5 mmol, 1 equiv.) was weighed into a 20 mL scintillation vial, dissolved in 10 mL CH<sub>2</sub>Cl<sub>2</sub>, and treated with CF<sub>3</sub>-dmba (**5a**) (101 mg, 92 μL, 0.5 mmol, 1 equiv.) at 20 °C. After 14 hours, the solvent was removed under reduced pressure, and the solids filtered over a pad of celite with diethyl ether 3x3mL, which was allowed to evaporate to ca. 1 mL under ambient conditions and layered with 5 mL pentane. After 14 h at 4 °C, the supernatant was decanted to afford 112 mg (66 % yield) of yellow crystals of [Pd(CF<sub>3</sub>-dmba)(OAc)]<sub>2</sub> (**9**). <sup>1</sup>H NMR (500 MHz, CD<sub>2</sub>Cl<sub>2</sub>) δ 2.06 (s, 6 H, NMe toward pi face), 2.07 (s, 6 H, OAc-CH<sub>3</sub>), 2.78 (s, 6 H, NMe away from pi face), 3.48 (m, 4 H, benzylic CH<sub>2</sub>), 7.08 (t, J=7.70 Hz, 2 H, meta to Pd), 7.28 (d, J=7.60 Hz, 2 H, ortho to Pd), 7.34 (d, J=7.65 Hz, 2 H, para to Pd). <sup>13</sup>C NMR (126 MHz, CD<sub>2</sub>Cl<sub>2</sub>) δ 24.25 (s, OAc-CH<sub>3</sub>), 51.12 (s, NMe toward pi face), 52.55 (s, NMe away from pi face), 70.11 (s, benzylic CH<sub>2</sub>), 121.47 (m, CH para to Pd), 124.01 (q, J=273.36 Hz, CF<sub>3</sub>), 124.08 (q, J=32.59 Hz, ipso to CF<sub>3</sub>), 124.72 (s, CH meta to Pd), 135.83 (s, CH ortho to Pd), 143.73 (s, aromatic quaternary), 146.59 (s, aromatic quaternary), 180.88 (s, OAc-CO<sub>2</sub>). <sup>19</sup>F NMR (470 MHz, CD<sub>2</sub>Cl<sub>2</sub>) δ -61.917

### Synthesis of [Pd(CF<sub>3</sub>-dmba)(NAc-Gly)]<sub>2</sub> (6a)

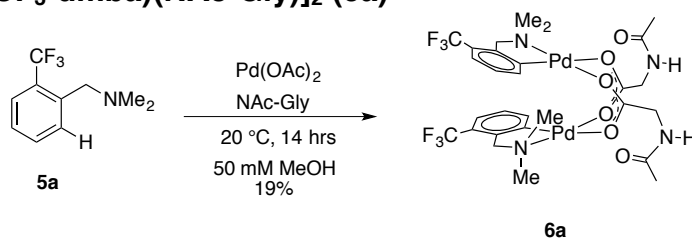

A 20 mL scintillation vial was charged with NAc-Gly (0.65 mmol, 76.1 mg, 1 equiv.), a stir bar, and 10 mL of methanol. The solution was stirred until the MPAA dissolved completely. To the MPAA solution was added solid Pd(OAc)<sub>2</sub> (0.65 mmol, 150 mg, 1 equiv.) and a solution of CF<sub>3</sub>-dmba (132 mg, 0.65 mmol, 1 equiv.) in 3 mL MeOH. The orange suspension gradually turned to a yellow solution and developed the smell of acetic acid. The solution was stirred for 14 hours at room temperature after which a 200 μL aliquot was concentrated in vacuo and analyzed by <sup>19</sup>F NMR which revealed complete consumption of starting material and 81% conversion to the desired product **6a** and 19% of mixed MPAA/ acetate complex **10**. Methanol was removed under a stream of nitrogen. The yellow solids were suspended in diethyl ether and transferred to a medium porosity frit where they were washed with 3x3mL diethyl ether to remove any free acetic acid. The yellow solids were washed through the frit with 5x2 mL 50:50 PhMe:CH<sub>2</sub>Cl<sub>2</sub> to remove any NAc-Gly. The yellow PhMe:CH<sub>2</sub>Cl<sub>2</sub> solution was layered with 5 mL diethyl ether, and stored over night at -35 °C. Decanting the supernatant afforded 53 mg (19% yield) of pure **6a**. Further crystallization of the precipitate resulted in material contaminated with 5-20% of the mixed acetate

MPAA complex **10**. Single crystals were grown from a concentrated solution of **6a** in CH<sub>2</sub>Cl<sub>2</sub> layered with an equal volume of styrene oxide at -35 °C.

**<sup>1</sup>H NMR (500 MHz, CD<sub>2</sub>Cl<sub>2</sub>)** δ 2.06 (s, 6 H, NAc-CH<sub>3</sub>), 2.07 (s, 6 H, NMe toward pi face), 2.80 (s, 6 H, NMe away from pi face), 3.51 (m, 4 H, benzylic CH<sub>2</sub>'s), 3.94 (dd, J<sub>NH</sub>=5.40, J<sub>HH</sub>=17.79 Hz, 2 H, NAc-Gly CH<sup>A</sup>H<sup>B</sup>), 4.05 (dd, J<sub>NH</sub>=5.40, J<sub>HH</sub>=17.79 Hz, 2 H, NAc-Gly CH<sup>A</sup>H<sup>B</sup>), 6.38 (t, J<sub>NH</sub>=5.40, 2 H, NH), 7.10 (t, J=7.72 Hz, 2 H, CH meta to Pd), 7.22 (d, J=7.15 Hz, 2 H, CH ortho to Pd), 7.37 (d, J=7.70 Hz, 2 H, para to Pd). **<sup>13</sup>C NMR (126 MHz, CD<sub>2</sub>Cl<sub>2</sub>)** δ 22.92 (s, NAc-CH<sub>3</sub>), 44.00 (s, Gly-CH<sub>2</sub>), 51.50 (s, NMe toward pi face), 52.72 (s, NMe away from pi face), 70.29 (s, benzylic CH<sub>2</sub>), 121.95 (m, CH para to Pd), 123.87 (q, J=273.39 Hz, CF<sub>3</sub>), 124.31 (q, J=31.57 Hz, ipso to CF<sub>3</sub>), 125.10 (s, CH meta to Pd), 135.53 (s, CH ortho to Pd), 143.65 (s, C aromatic quaternary), 145.44 (s, C aromatic quaternary), 169.77 (s, NAc-Gly C(O)N), 178.97 (s, NAc-Gly C(O)<sub>2</sub>). **<sup>19</sup>F NMR (470 MHz, CD<sub>2</sub>Cl<sub>2</sub>)** δ -62.1103

Treating mixtures of **6a** and **10** in acetone with with an excess of aqueous lithium chloride generally afforded good conversion to the chloride bridged dimer **8**.<sup>6</sup>

Hiraki, K.; Fuchita, Y.; Pfeffer, M. 6-Membered Cyclopalladated Complexes of 2-benzylpyridine; Inorganic Syntheses, Vol 28, pp 208-211, 1989.

### Synthesis of [Pd(CF<sub>3</sub>-dmba)(NAC-Ala)]<sub>2</sub> (**6b**)

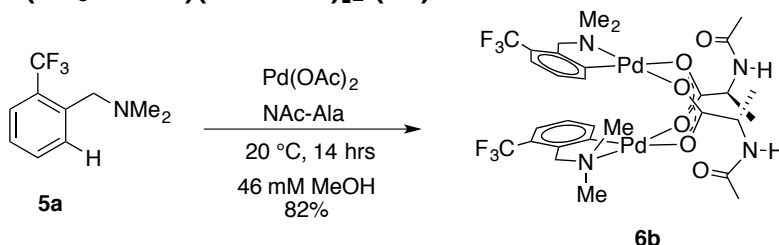

A 200 mL round bottom flask was charged with NAc-Ala (2.29 mmol, 300 mg, 1 equiv.), a stir bar, and 40 mL of methanol. The solution was stirred until the MPAA dissolved completely. To the MPAA solution was added solid Pd(OAc)<sub>2</sub> (2.20 mmol, 514 mg, 1 equiv.) and a solution of CF<sub>3</sub>-dmba (2.29 mmol, 465 mg, 1 equiv.) in 10 mL MeOH. The orange suspension gradually turned to a yellow solution and developed the smell of acetic acid. The solution was stirred for 14 hours at room temperature after which a 200 μL aliquot was concentrated in vacuo and analyzed by <sup>19</sup>F NMR which revealed complete consumption of starting material and 91% conversion to the desired product **6b**. Methanol was removed under a stream of nitrogen. The yellow solid was filtered over a medium porosity frit with 4x3 mL CH<sub>2</sub>Cl<sub>2</sub>. The yellow solution was allowed to slowly evaporate to ca. 5 mL and crystallized by slow diffusion of diethyl ether (5 mL) at -35 °C to give 825 mg (82% yield) of **6b**. Single crystals suitable for x-ray diffraction were grown by slow evaporation of a 5 mM solution of **6b** in acetonitrile under ambient conditions.

**<sup>1</sup>H NMR (500 MHz, CD<sub>2</sub>Cl<sub>2</sub>)** δ 1.33 (t, J=6.55 Hz, 6 H, Ala CH<sub>3</sub> + Ala CH<sub>3</sub>'), 2.00 (s, 3 H, NAc CH<sub>3</sub>'), 2.04 (s, 3 H, NAc CH<sub>3</sub>), 2.05 (s, 3 H, NMe upfield'), 2.07 (s, 1 3 H, NMe upfield), 2.81 (s, 3 H, NMe downfield'), 2.81 (s, 3 H, NMe downfield), 3.53 (m, 4 H, benzylic CH<sub>2</sub> + benzylic CH<sub>2</sub>'), 4.39 (m, 1 H, Ala methine'), 4.45 (m, 1 H, Ala methine), 6.24 (d, J=7.00 Hz, 1 H, NH'), 6.28 (d, J=6.75 Hz, 1 H, NH), 7.09 (m, 2 H, CH meta to Pd + CH meta to Pd'), 7.17 (d, J=7.60 Hz, 1 H, CH ortho to Pd'), 7.24 (d, J=7.75 Hz, 1 H, CH ortho to Pd), 7.37 (d, J=7.75 Hz, 2 H, CH para to Pd + CH para to Pd'). **<sup>13</sup>C NMR (126 MHz, CD<sub>2</sub>Cl<sub>2</sub>)** δ 18.87 (s, Ala CH<sub>3</sub>'), 18.99 (s, Ala CH<sub>3</sub>), 23.05 (s, NAc CH<sub>3</sub> + NAc CH<sub>3</sub>'), 50.69 (s, Ala CH'), 50.72 (s, Ala CH), 51.51 (s, NMe toward pi face + NMe toward pi face'), 52.75 (s, NMe away from pi face'), 52.79 (s,

NMe away from pi face), 70.26 (s, 1 benzylic CH<sub>2</sub> + benzylic CH<sub>2</sub>'), 121.81 (m, CH para to Pd + CH para to Pd'), 123.91 (q, J=273.27 Hz, CF<sub>3</sub> + CF<sub>3</sub>'), 124.25 (q, J=31.26 Hz, C ipso to CF<sub>3</sub>'), 124.27 (q, J=31.38 Hz, C ipso to CF<sub>3</sub>'), 124.96 (s, CH meta to Pd'), 125.02 (s, CH meta to Pd), 135.55 (s, CH ortho to Pd'), 135.65 (s, CH ortho to Pd), 143.65 (s, quaternary aromatic), 143.68 (s, quaternary aromatic), 145.77 (s, quaternary aromatic), 145.84 (s, quaternary aromatic), 168.96 (s, C(O)N'), 169.00 (s, C(O)N), 181.73 (s, CO<sub>2</sub>'), 181.79 (s, CO<sub>2</sub>) <sup>19</sup>F NMR (470 MHz, CD<sub>2</sub>Cl<sub>2</sub>) δ -61.975 (s), -61.986 (s).

### Synthesis of [Pd(CF<sub>3</sub>-dmba)(NAC-Leu)]<sub>2</sub> (6c)

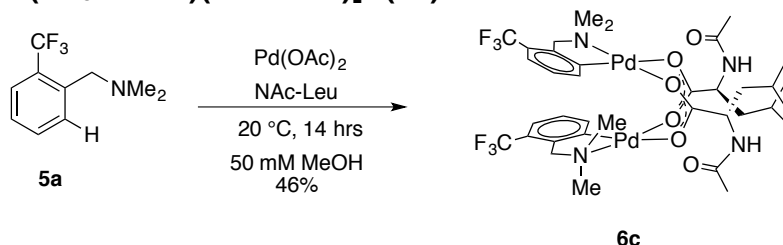

A 20 mL scintillation vial was charged with NAc-Leu (0.5 mmol, 86.5 mg, 1 equiv.), a stir bar, and 8 mL of methanol. The solution was stirred until the MPAA dissolved completely. To the MPAA solution was added solid Pd(OAc)<sub>2</sub> (0.5 mmol, 112 mg, 1 equiv.) and a solution of CF<sub>3</sub>-dmba (102 mg, 0.5 mmol, 1 equiv.) in 2 mL MeOH. The orange suspension gradually turned to a yellow solution and developed the smell of acetic acid. The solution was stirred for 14 hours at room temperature after which a 200 μL aliquot was concentrated in vacuo and analyzed by <sup>19</sup>F NMR which revealed complete consumption of starting material and 62% conversion to **6c**. Methanol was removed under a stream of nitrogen and the yellow solid filtered through a medium porosity frit with benzene (4x 3 mL). The yellow benzene solution was concentrated to c.a. 5 mL under a stream of nitrogen and layered with 5 mL of pentane. After 14 h of slow diffusion of pentane into the benzene solution, the supernatant was decanted and the solids washed with pentane to afford 106 mg (46% yield) **6c**. Single crystals suitable for x-ray diffraction were grown by layering 1 mL of 10 mM **6c** in CH<sub>2</sub>Cl<sub>2</sub> with 1 mL PhMe followed by 2 mL n-heptane.

**NMR (500 MHz, CD<sub>2</sub>Cl<sub>2</sub>)** δ 0.98 (m, 12 H, Leu CH<sub>3</sub>'s), 1.51 (m, 4 H, Leu CH<sub>2</sub>'s), 1.68 (m, 2 H, Leu CH's), 2.00 (s, 3 H, NAc CH<sub>3</sub>'), 2.04 (s, 3 H, NMe toward pi face'), 2.07 (s, 3 H, NAc CH<sub>3</sub>), 2.07 (s, 3 H, NMe toward pi face), 2.78 (s, 3 H, NMe away from pi face'), 2.80 (s, 3 H, NMe away from pi face), 3.52 (m, 4 H, benzylic CH<sub>2</sub> + benzylic CH<sub>2</sub>'), 4.44 (m, 1 H, Leu Ha'), 4.53 (m, 1 H, Leu Ha), 5.95 (d, J=8.55 Hz, 1 H, NH'), 6.04 (d, J=8.35 Hz, 1 H, NH), 7.10 (m, 3 H, CH ortho to Pd' + CH's meta to Pd), 7.28 (d, J=7.45 Hz, 1 H, CH ortho to Pd), 7.35 (d, J=7.50 Hz, 2 H, CH para to Pd + CH para to Pd') **<sup>13</sup>C NMR (126 MHz, CD<sub>2</sub>Cl<sub>2</sub>)** δ 21.59 (s, Leu CH<sub>3</sub>'), 22.91 (s, Leu CH<sub>3</sub>), 22.94 (s, Leu CH<sub>3</sub>), 23.04 (s, NAc CH<sub>3</sub>'), 23.06 (s, NAc CH<sub>3</sub>), 25.00 (s, Leu CH'), 25.02 (s, Leu CH), 42.41 (s, Leu CH<sub>2</sub>'), 42.47 (s, Leu CH<sub>2</sub>), 51.54 (s, NMe toward pi face'), 51.60 (s, NMe toward pi face), 52.68 (s, NMe away from pi face'), 52.74 (s, NMe away from pi face), 53.39 (s, Leu Ca'), 53.43 (s, Leu Ca), 70.27 (s, benzylic CH<sub>2</sub>'), 70.29 (s, benzylic CH<sub>2</sub>'), 121.74 (m, CH para to Pd + CH para to Pd'), 123.92 (q, J=273.34 Hz, CF<sub>3</sub>'), 123.93 (q, J=273 Hz, CF<sub>3</sub>'), 124.15 (q, J=31.38 Hz, C ipso to CF<sub>3</sub>'), 124.22 (q, J=31.10 Hz, C ipso to CF<sub>3</sub>'), 124.82 (s, CH meta to Pd'), 124.98 (s, CH meta to Pd), 135.48 (s, CH ortho to Pd'), 135.84 (s, CH ortho to Pd), 143.61 (s, aromatic quaternary), 143.73 (s, aromatic quaternary), 145.91 (s, aromatic quaternary), 146.02 (s, aromatic quaternary), 169.23 (s, C(O)N'), 169.25 (s, C(O)N), 181.87 (s, CO<sub>2</sub>'), 181.90 (s, CO<sub>2</sub>) **<sup>19</sup>F NMR (470 MHz, CD<sub>2</sub>Cl<sub>2</sub>)** δ -61.944, -61.976



## Synthesis of [Pd(CF<sub>3</sub>-dmba)(NAC-Ile)]<sub>2</sub> (6d)

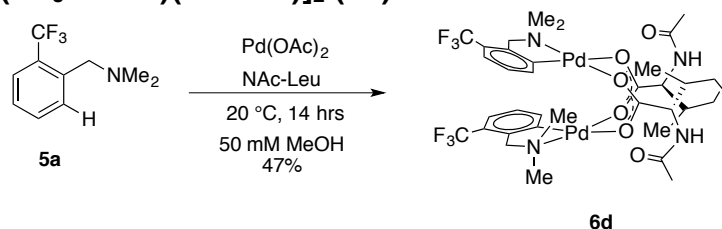

A 20 mL scintillation vial was charged with NAc-Ile (0.5 mmol, 86.5 mg, 1 equiv.), a stir bar, and 8 mL of methanol. The solution was stirred until the MPAA dissolved completely. To the MPAA solution was added solid Pd(OAc)<sub>2</sub> (0.5 mmol, 112 mg, 1 equiv.) and a solution of CF<sub>3</sub>-dmba (102 mg, 0.5 mmol, 1 equiv.) in 2 mL MeOH. The orange suspension gradually turned to a yellow solution and developed the smell of acetic acid. The solution was stirred for 14 hours at room temperature after which a 200  $\mu$ L aliquot was concentrated in vacuo and analyzed by <sup>19</sup>F NMR which revealed complete consumption of starting material and 69% conversion to **6d**. Methanol was removed under a stream of nitrogen and the yellow solids were suspended in 2 mL diethyl ether. The suspension was transferred to a medium porosity frit and washed 2x 2 mL diethyl ether to remove residual acetic acid (note, the diethyl ether filtrate contains a substantial quantity of **6d**). The yellow solids on the frit were washed into a separate flask with 5 x 1 mL CH<sub>2</sub>Cl<sub>2</sub> and precipitated by slow diffusion with 10 mL pentane at room temperature to afford 103.2 mg (47% yield) of **6d**.

**<sup>1</sup>H NMR (500 MHz, CD<sub>2</sub>Cl<sub>2</sub>)**  $\delta$  0.89 (m, 6H, Ile Me + Me'), 0.95 (m, 6H, Ile Et-CH<sub>3</sub> + Et-CH<sub>3</sub>'), 1.18 (m, 2H, Ile Et-CH<sub>2</sub><sup>a</sup> + Et-CH<sub>2</sub><sup>a</sup>'), 1.44 (m, 2H, Ile Et-CH<sub>2</sub><sup>b</sup> + Et-CH<sub>2</sub><sup>b</sup>'), 1.87 (m, 2H, Ile CH + CH'), 2.01 (s, 3H, NAc-CH<sub>3</sub>'), 2.03 (s, 3H, NMe' toward pi face), 2.04 (s, 3H, NMe toward pi face), 2.06 (s, 3H, NAc-CH<sub>3</sub>'), 2.78 (s, 3H, NMe' away from pi face), 2.81 (s, 3H, NMe away from pi face), 3.55 (m, 4H, benzylic CH<sub>2</sub>'s), 4.40 (dd, J=5.0, 8.9 Hz, 1 H, Ile Ha'), 4.47 (dd, J=5.0, 8.9 Hz, 1 H, Ile Ha), 6.13 (t, J=8.9 Hz, 1H, NH'), 6.21 (t, J=8.9 Hz, 1H, NH), 7.09 (m, 3H, CH's meta to Pd + CH ortho to Pd'), 7.29 (d, J=7.40 Hz, 1H, CH ortho to Pd), 7.36 (d, J=7.45 Hz, 1H, CH para to Pd + CH para to Pd') **<sup>13</sup>C NMR (126 MHz, CD<sub>2</sub>Cl<sub>2</sub>)**  $\delta$  11.48 (s, Ile Et-CH<sub>3</sub>'), 11.49 (s, Ile Et-CH<sub>3</sub>'), 15.40 (s, Ile Me'), 15.43 (s, Ile Me), 23.12 (s, NAc-CH<sub>3</sub>'), 23.13 (s, NAc-CH<sub>3</sub>'), 25.17 (s, Ile Et-CH<sub>2</sub>'), 25.21 (s, Ile Et-CH<sub>2</sub>'), 38.20 (s, Ile-CH'), 38.25 (s, Ile-CH), 51.47 (s, NMe' toward pi face), 51.71 (s, NMe' toward pi face), 52.77 (s, NMe' + NMe away from pi face), 59.13 (s, Ile Ca'), 59.31 (s, Ile Ca), 70.22 (s, benzylic CH<sub>2</sub>'), 70.35 (s, benzylic CH<sub>2</sub>'), 121.82 (m, CH para to Pd + CH para to Pd'), 123.90 (q, J=273.57 Hz, CF<sub>3</sub> + CF<sub>3</sub>'), 124.21 (q, J=32.0 Hz, C ipso to CF<sub>3</sub>'), 124.31 (q, J=31.4 Hz, C ipso to CF<sub>3</sub>'), 124.85 (s, CH meta to Pd'), 124.99 (s, CH meta to Pd), 135.46 (s, CH ortho to Pd'), 135.82 (s, CH ortho to Pd), 143.54 (s, C aromatic quaternary), 143.68 (s, C aromatic quaternary), 145.73 (s, C aromatic quaternary), 145.77 (s, C aromatic quaternary), 169.04 (s, C(O)N'), 169.08 (s, C(O)N), 180.44 (s, CO<sub>2</sub>'), 180.59 (s, CO<sub>2</sub>) **<sup>19</sup>F NMR (470 MHz, CD<sub>2</sub>Cl<sub>2</sub>)**  $\delta$  -61.932, -61.967

## Synthesis of [Pd(CF<sub>3</sub>-dmba)(Cl)]<sub>2</sub> (8)

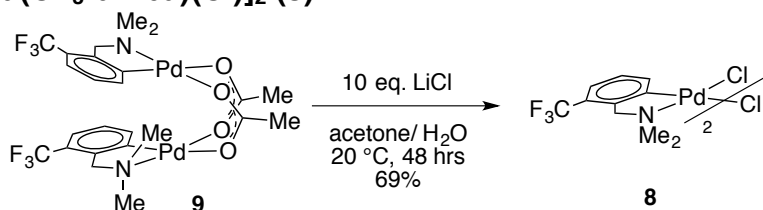

Chloride bridged dimer **8** was prepared by modification of a known procedure.<sup>7</sup> In 100 mL round bottom flask was with a magnetic stir bar, **9** (0.5 mmol, 382 mg, 1 equiv.) was dissolved in 20 mL acetone. The acetone solution was treated with 10 mL of aqueous lithium chloride (5.0 mmol, 212 mg, 10 equiv.) and flask was sealed with a rubber septum. After two days at room temperature, acetone was removed under reduced pressure to afford a yellow solid which was washed with 3x10 mL water. The yellow solid was washed through a medium porosity frit with diethyl ether, which was concentrated to c.a. 3 mL under a stream of nitrogen and layered with pentane to afford 475 mg (69% yield) of **8** as a mixture of two isomers (as has been previously noted for analogous chloride bridged dmba palladacycles).<sup>7</sup>

**<sup>1</sup>H NMR (500 MHz, CD<sub>2</sub>Cl<sub>2</sub>)** δ 2.89 (s, 6 H), 2.90 (s, 6 H), 4.14 (m, 4 H), 7.04 (t, J=7.75 Hz, 2 H), 7.34 (d, J=7.70 Hz, 2 H), 7.40 (m, 2 H) **<sup>13</sup>C NMR (126 MHz, CD<sub>2</sub>Cl<sub>2</sub>)** δ 52.86 (s), 53.05 (s), 70.98 (s), 71.21 (s), 121.82 (q, J=5.12 Hz), 123.98 (q, J=273.21 Hz), 124.13 (q, J=31.19 Hz), 124.91 (s), 125.03 (s), 136.76 (s), 137.09 (s), 144.06 (m), 145.38 (s) **<sup>19</sup>F NMR (470 MHz, CD<sub>2</sub>Cl<sub>2</sub>)** δ -61.646 (s), -61.682 (s)  
Milani, J.; Pridmore, N. E.; Whitwood, A. C.; Fairlamb, I. J. S.; Perutz, R. N. *Organometallics* 2015, 34 (17), 4376.

### Synthesis of Pd(CF<sub>3</sub>-dmba)(acac) (**7**)

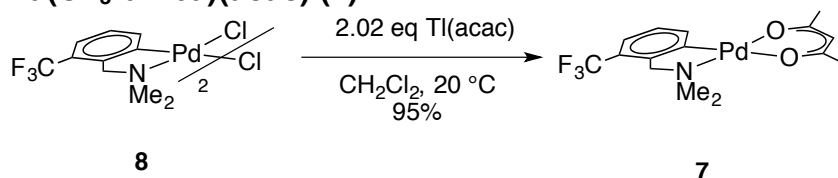

The acac complex **7** was prepared by modification of a known procedure.<sup>5</sup> In an inert atmosphere glove box, a 20 mL scintillation vial equipped with a magnetic stirrer was dissolved complex **8** (306 mg, 0.445 mmol, 1 equiv.) in 5 mL CH<sub>2</sub>Cl<sub>2</sub>. To this solution was added solid thallium acetylacetonate (0.898 mmol, 273 mg, 2.02 equiv.). A white solid precipitated immediately and the suspension was stirred for 1 hour after which the suspension was passed over a medium porosity frit, washed with CH<sub>2</sub>Cl<sub>2</sub> 3x 3 mL and concentrated under reduced pressure to afford **7** 345 mg (95% yield).

**<sup>1</sup>H NMR (500 MHz, CD<sub>2</sub>Cl<sub>2</sub>)** δ 2.01 (s,3 H), 2.05 (s,3 H), 2.87 (s,6 H), 4.10 (s,2 H), s,1 H), 7.11 (t, J=7.63 Hz, 1 H), 7.32 (d, J=7.70 Hz, 1 H), 7.53 (d, J=7.65 Hz, 1 H) **<sup>13</sup>C NMR (126 MHz, CD<sub>2</sub>Cl<sub>2</sub>)** δ 27.22 (s), 27.77 (s), 51.85 (s), 71.16 (q, J=2.05 Hz), 99.92 (s), 121.18 (q, J=5.34 Hz), 123.38 (q, J=30.56 Hz), 124.48 (q, J=271.15 Hz), 134.66 (m), 144.09 (m), 148.98 (s), 186.26 (s), 188.45 (s) **<sup>19</sup>F NMR (470 MHz, CD<sub>2</sub>Cl<sub>2</sub>)** δ -61.541

Diaz-de-Villegas. *Journal of Organometallic Chemistry* 1995, 490, 35.

## Section S1.3: Synthesis of substrate and authentic standards

### Synthesis of CF<sub>3</sub>-dmba (5a)

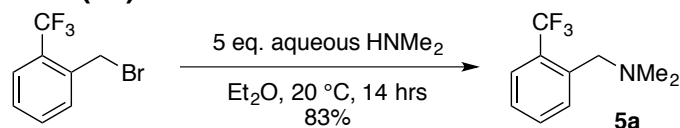

**5a** was prepared by a previously reported procedure with minor modification.<sup>8</sup> To a 500 mL round bottom flask equipped with a magnetic stir bar was added the benzylic bromide (100.4 mmol, 24g, 1 equiv.) and 100 mL diethyl ether. To the ethereal solution was added aqueous dimethylamine (502 mmol, 56.5g (40 wt%), 5 equiv.). The heterogeneous mixture was stirred for 14 h at room temperature, after which the organic phase was separated and extracted 3 times with 10 wt% aqueous citric acid. The combined aqueous phases were treated with 15 wt% aqueous sodium hydroxide and extracted 3 times with diethyl ether. The ethereal extracts were concentrated under reduced pressure and the clear liquid was further purified by short path distillation (0.08 mmHg, 60 °C) into a receiving flask cooled to -10 °C to afford 16.86g (83% yield) of **5a**.

<sup>1</sup>H NMR (500 MHz, CD<sub>2</sub>Cl<sub>2</sub>) δ 2.31 (s, 6H, NMe<sub>2</sub>), 3.64 (s, 2H, CH<sub>2</sub>), 7.39 (t, J=7.63 Hz, H<sup>c</sup>), 7.59 (t, J=7.58 Hz, H<sup>b</sup>), 7.68 (d, J=7.85 Hz, H<sup>d</sup>), 7.85 (d, J=7.80 Hz, H<sup>a</sup>) <sup>13</sup>C NMR (126 MHz, CD<sub>2</sub>Cl<sub>2</sub>) δ 45.29 (s, NMe<sub>2</sub>), 59.51 (q, J=1.72 Hz, CH<sub>2</sub>), 124.63 (q, J=271.19 Hz, CF<sub>3</sub>), 125.50 (q, J=5.89 Hz, CH ortho to CF<sub>3</sub>), 126.65 (s, CH para to CH<sub>2</sub>), 128.22 (q, J=29.97 Hz, C ipso to CF<sub>3</sub>), 130.52 (s, CH ortho to CH<sub>2</sub>), 131.78 (m, CH para to CF<sub>3</sub>), 138.69 (q, J=1.47 Hz, C ipso to CH<sub>2</sub>) <sup>19</sup>F NMR (470 MHz, CDCl<sub>3</sub>) δ -59.04  
Tayama, E.; Kimura, H. *Angew. Chem. Int. Ed.* 2007, 46 (46), 8869.

### Synthesis of Cl-CF<sub>3</sub>-dmba (5b)

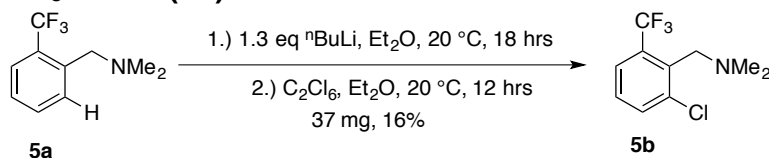

A 25 mL round bottom flask equipped with a magnetic stir bar and septum was evacuated and refilled with nitrogen 3 times. To the flask, under nitrogen, was added **5a** (1 mmol, 203 mg, 1 equiv.) and 2.5 mL anhydrous diethyl ether. To the ethereal solution, n-butyl lithium (1.3 mmol, 0.845 mL (1.54M), 1.3 equiv.) was added drop-wise. The mixture was stirred under nitrogen for 18 hours at room temperature. Hexachloroethane (1.3 mmol, 308 mg, 1.3 equiv.) was added drop-wise under nitrogen as a solution in 5 mL anhydrous diethyl ether. The mixture was stirred for 12 hours under nitrogen and quenched under air with 2 grams of silica gel slurried in 5 mL of diethyl ether. The volatiles were removed under reduced pressure and the solids were loaded onto a silica gel column. Eluting with a gradient from 1-5% diethyl ether in hexanes gave two pure fractions which were combined and concentrated to give **5b** 37 mg (16% yield).

<sup>1</sup>H NMR (500 MHz, CDCl<sub>3</sub>) δ (s, 6H, NMe<sub>2</sub>), 3.70 (s, 2H, CH<sub>2</sub>), 7.34 (t, J=8.0 Hz, CH meta to CF<sub>3</sub>), 7.61 (d, J=8.0 Hz, CH para to CF<sub>3</sub> + CH ortho to CF<sub>3</sub>) <sup>13</sup>C NMR (126 MHz, CDCl<sub>3</sub>) δ 45.33 (s, NMe<sub>2</sub>), 56.38 (s, CH<sub>2</sub>), 123.82 (q, J=274.71 Hz, CF<sub>3</sub>), 124.79 (q, J=6.05 Hz, CH ortho to CF<sub>3</sub>), 128.19 (s, CH meta to CF<sub>3</sub>), 131.47 (q, J=29.73 Hz, C ipso to CF<sub>3</sub>), 133.68 (s, CH para to CF<sub>3</sub>), 136.04 (s, aromatic C quaternary), 138.16 (s, aromatic C quaternary) <sup>19</sup>F NMR (470 MHz, CDCl<sub>3</sub>) δ -57.26

## Synthesis of Br-CF<sub>3</sub>-dmba (5c)

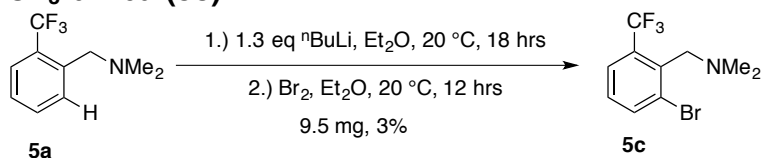

A 25 mL round bottom flask equipped with a magnetic stir bar and septum was evacuated and refilled with nitrogen 3 times. To the flask, under nitrogen, was added **5a** (1 mmol, 203 mg, 1 equiv.) and 2.5 mL anhydrous diethyl ether. To the ethereal solution, n-butyl lithium (1.3 mmol, 0.845 mL (1.54M), 1.3 equiv.) was added drop-wise. The mixture was stirred under nitrogen for 18 hours at room temperature. Bromine (1.3 mmol, 208 mg, 67 $\mu$ L, 1.3 equiv.) was added drop-wise under nitrogen. The mixture was stirred for 12 hours under nitrogen, quenched with 1 mL water, and acidified with 5 mL 2M HCl. The aqueous fraction was basified with 2M NaOH and extracted 3x with 5 mL diethyl ether. To the ethereal extracts was added 2g of celite and the solvent was removed under reduced pressure. The celite pad was loaded on a silica gel column which was eluted with a gradient from 1-10% diethyl ether in hexanes. Three pure fractions were obtained as assayed by GCMS and were combined to give **5c** 9.5 mg (3% yield).

<sup>1</sup>H NMR (500 MHz, CDCl<sub>3</sub>)  $\delta$  2.31 (s, 6H, NMe<sub>2</sub>), 3.70 (s, 2H, CH<sub>2</sub>), 7.25 (t, J=7.9 Hz, 1 H), 7.66 (d, J=7.9 Hz, 1 H), 7.82 (d, J=7.9 Hz, 1 H) <sup>13</sup>C NMR (126 MHz, CDCl<sub>3</sub>)  $\delta$  45.17 (s, NMe<sub>2</sub>), 58.55 (s, CH<sub>2</sub>), 123.44 (q, J=32.12 Hz, C ipso to CF<sub>3</sub>), 123.70 (q, J=280.88 Hz, CF<sub>3</sub>), 125.41 (q, J=6.02 Hz, CH ortho to CF<sub>3</sub>), 128.37 (s, aromatic C quaternary), 128.69 (s, aromatic C quaternary), 128.81 (s, aromatic C quaternary), 137.20 (s, aromatic CH) <sup>19</sup>F NMR (470 MHz, CDCl<sub>3</sub>)  $\delta$  -57.12

## Synthesis of I-CF<sub>3</sub>-dmba (5d)

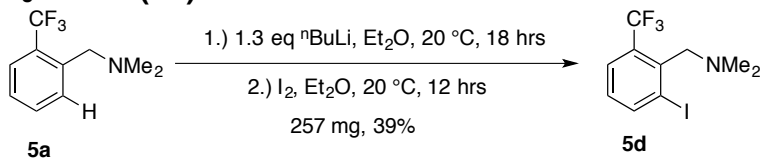

A 25 mL round bottom flask equipped with a magnetic stir bar and septum was evacuated and refilled with nitrogen 3 times. To the flask, under nitrogen, was added **5a** (2 mmol, 406 mg, 1 equiv.) and 5 mL anhydrous diethyl ether. To the ethereal solution, n-butyl lithium (2.6 mmol, 1.69 mL (1.54M), 1.3 equiv.) was added drop-wise. The mixture was stirred under nitrogen for 18 hours at room temperature. Iodine (2.6 mmol, 660 mg, 1.3 equiv.) was added drop-wise under nitrogen as a solution in 5 mL anhydrous diethyl ether. The mixture was stirred for 12 hours under nitrogen and quenched under air with 2 grams of silica gel suspended in 5 mL of diethyl ether. The volatiles were removed under reduced pressure and the solids were loaded onto a silica gel column. Eluting with a 5% triethylamine in hexanes gave two pure fractions which were combined and concentrated to give **5d** 257 mg (39% yield).

<sup>1</sup>H NMR (500 MHz, CDCl<sub>3</sub>)  $\delta$  2.29 (s, 6H, NMe<sub>2</sub>), 3.64 (s, 2H, CH<sub>2</sub>), 7.05 (t, J=7.9 Hz, 1 H), 7.67 (d, J=7.9 Hz, 1 H), 8.12 (d, J=7.9 Hz, 1 H) <sup>13</sup>C NMR (126 MHz, CDCl<sub>3</sub>)  $\delta$  44.80 (s, NMe<sub>2</sub>), 61.93 (d, J=1.48 Hz, CH<sub>2</sub>), 104.27 (q, J=4.1 Hz, aromatic quaternary), 123.72 (q, J=275.04 Hz, CF<sub>3</sub>), 125.97 (q, J=6.10 Hz, CH ortho to CF<sub>3</sub>), 128.39 (s, 1 CH meta to CF<sub>3</sub>), 130.56 (q, J=29.82 Hz, C ipso to CF<sub>3</sub>), 140.06 (s, aromatic quaternary), 144.27 (d, J=1.01 Hz, CH para to CF<sub>3</sub>) <sup>19</sup>F NMR (470 MHz, CDCl<sub>3</sub>)  $\delta$  -56.94

## Section S1.4: Attempted bridge splitting equilibrium experiments

It has been reported<sup>9-11</sup> that carboxylate bridged palladacycles can undergo a bridge splitting reaction in the presence of nitrogen donor. We sought to assess whether in the presence of excess substrate, the MPAA complex **6a** underwent a similar bridge splitting reaction. Surprisingly, **6a** showed no sign of reaction when treated with as much as 100 eq. of **5a**. The last spectrum in each series is **5a** with no Pd, to show that the new small new peaks visible when **6a** is treated with 100 eq. **5a** are from minor (<0.5%) impurities in **5a**, not from new species in equilibrium with **6a**.

Deprez, N. R.; Sanford, M. S. *J. Am. Chem. Soc.* 2009, 131 (31), 11234.

Powers, D. C.; Xiao, D. Y.; Geibel, M. A. L.; Ritter, T. *J. Am. Chem. Soc.* 2010, 132 (41), 14530.

Ryabov, A. D. *Inorg. Chem.* 1987, 26, 1252.

### stacked <sup>19</sup>F NMR spectra

#### <sup>19</sup>F NMR

\*= trace (<0.5%) impurities in **5a**

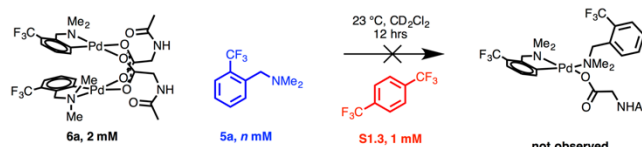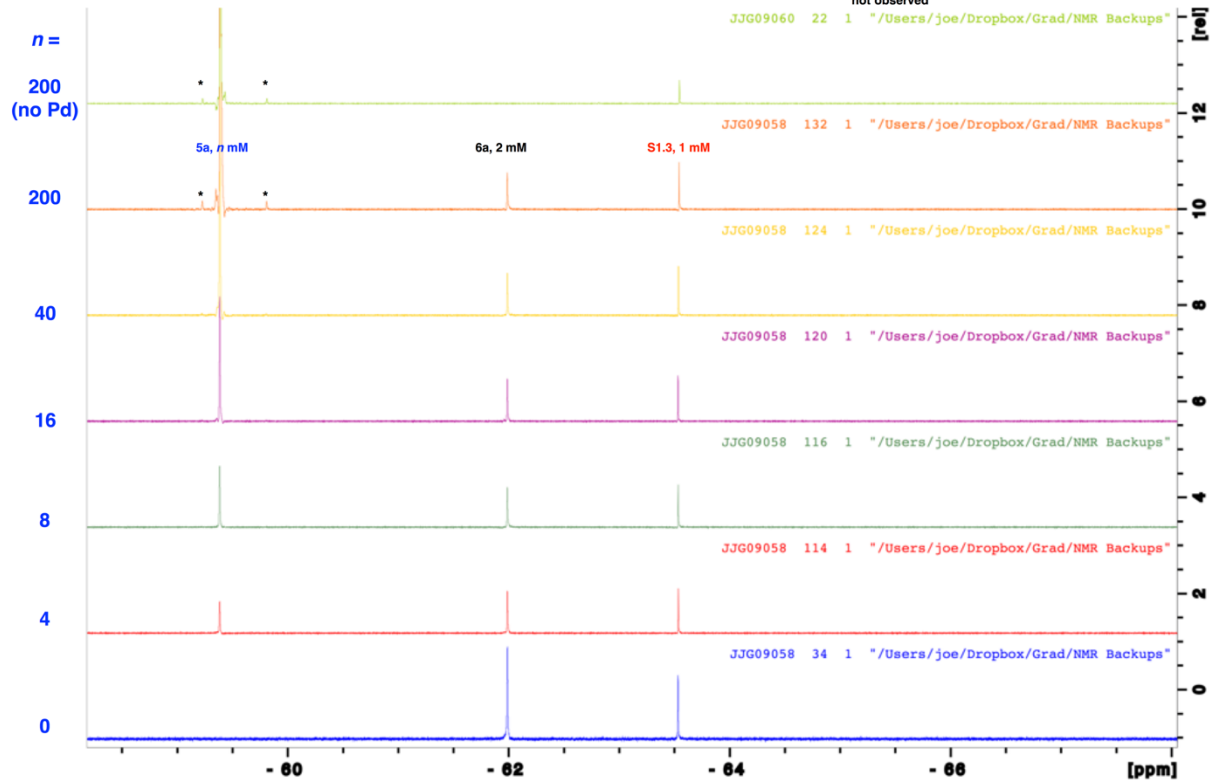

## stacked $^1\text{H}$ NMR spectra

### $^1\text{H}$ NMR

\*= residual water in 5a  
 \*\*= residual diethyl ether in 5a

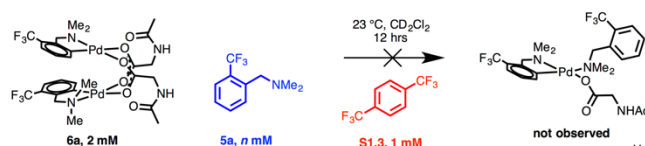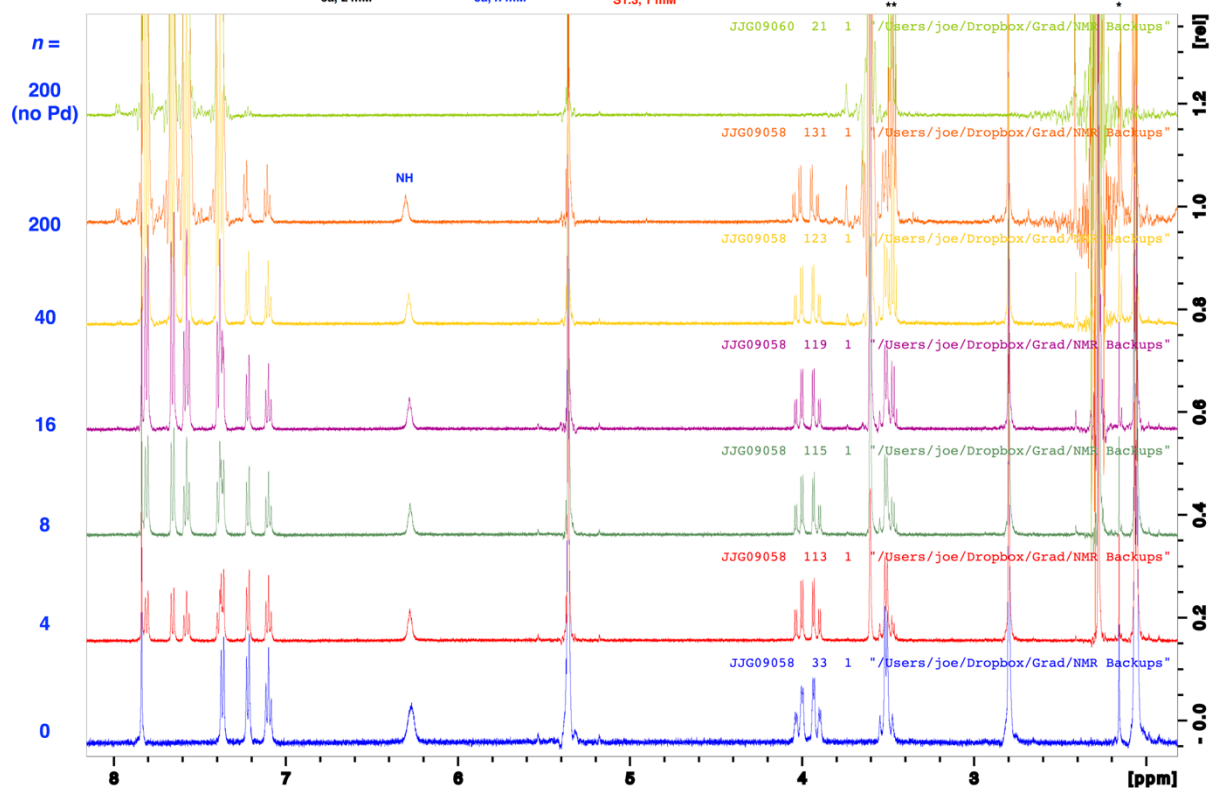

Notably, in the presence of a large excess of a strong  $^{12}$  hydrogen bond acceptor (tertiary amine 5a), there is no change in the chemical shift of the MPAA amide N-H. This is consistent with (although not sufficient to prove) intramolecular hydrogen-bonding between the two MPAA's ( $\text{AcN}\cdots\text{H}\cdots\text{O}$ ) that is strong enough to not be perturbed in the presence of a large excess a stronger hydrogen bond acceptor.

Laurence, C.; Legros, J.; Nicolet, P.; Vuluga, D.; Chantzis, A.; Jacquemin, D. *J Phys Chem B* 2014, 118 (27), 7594.

## Section S1.5: looking for species in equilibrium with MPAA complexes

variable concentration UV-vis of **6a** in  $\text{CH}_2\text{Cl}_2$

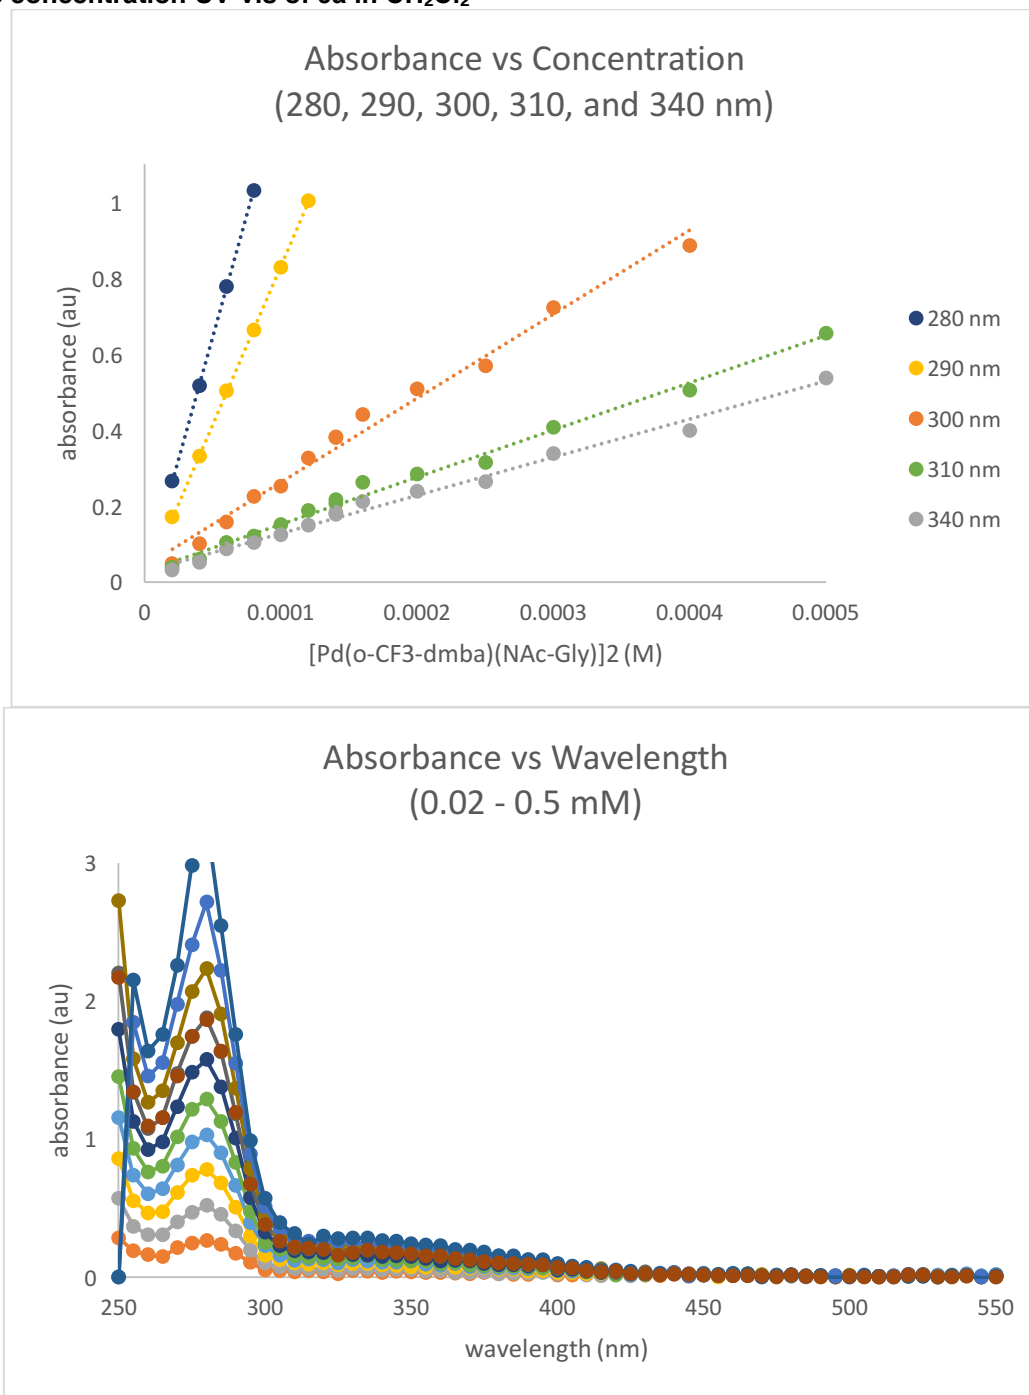

The possibility of dissociation of **6a** into two putative monomers (or equilibrium with another species) at low concentrations was not observed based on linear, concentration-dependent UV-Vis spectra from 0.02-0.5 mM in  $\text{CH}_2\text{Cl}_2$ .

**variable concentration  $^{19}\text{F}$  NMR of **6b** in  $\text{CD}_2\text{Cl}_2$**

Solutions of **6b** from 3-39 mM (with 2.2 mM 1,4-bis(trifluoromethyl)benzene) were monitored by  $^{19}\text{F}$  NMR to look for possible aggregation at high concentration or dissociation to putative monomeric species at low concentration. Over the range of concentrations monitored, no evidence for any species in equilibrium with **6b** was observed.

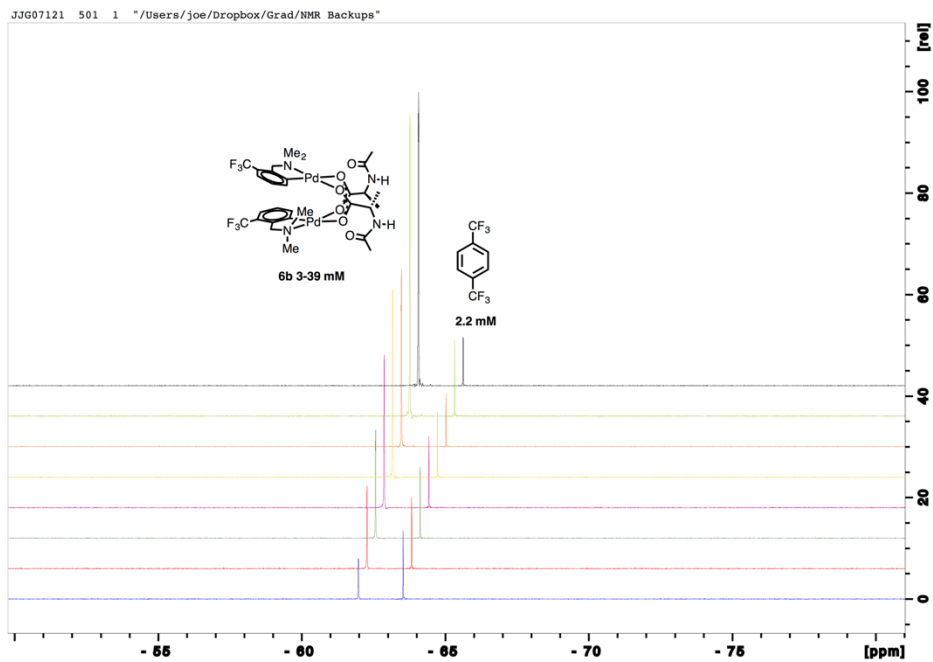



### low temperature $^1\text{H}$ NMR of **6a** in $\text{CD}_2\text{Cl}_2$

In an attempt to observe species that might be in rapid exchange on the NMR time scale at room temperature, a sample of **6a** in  $\text{CD}_2\text{Cl}_2$  was cooled from  $15\text{ }^\circ\text{C}$  down to  $-40\text{ }^\circ\text{C}$  in the NMR spectrometer using a variable temperature probe, which revealed substantial changes in chemical shift and peak shape, especially for the amide N-H (indicated by a colored line at each temperature). Vertical black lines are guides to visualize small changes in chemical shift. These changes could be indicative of a dynamic process (eg carboxylate exchange or rotation about C-C or C-N bonds in the MPAA), but no distinct new species were observed.

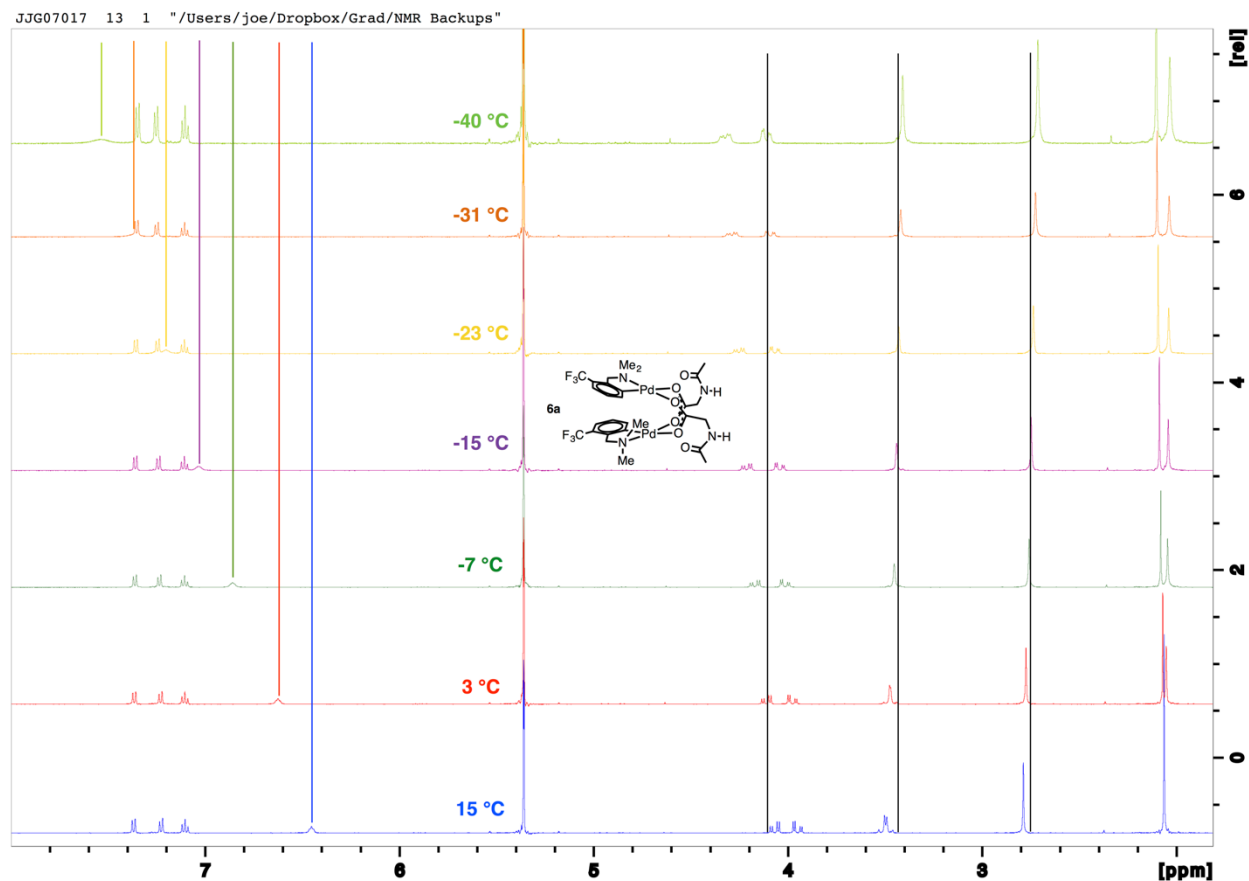

high temperature  $^1\text{H}$  NMR of 6a in 1,1,2,2-tetrachloroethane- $\text{d}_2$

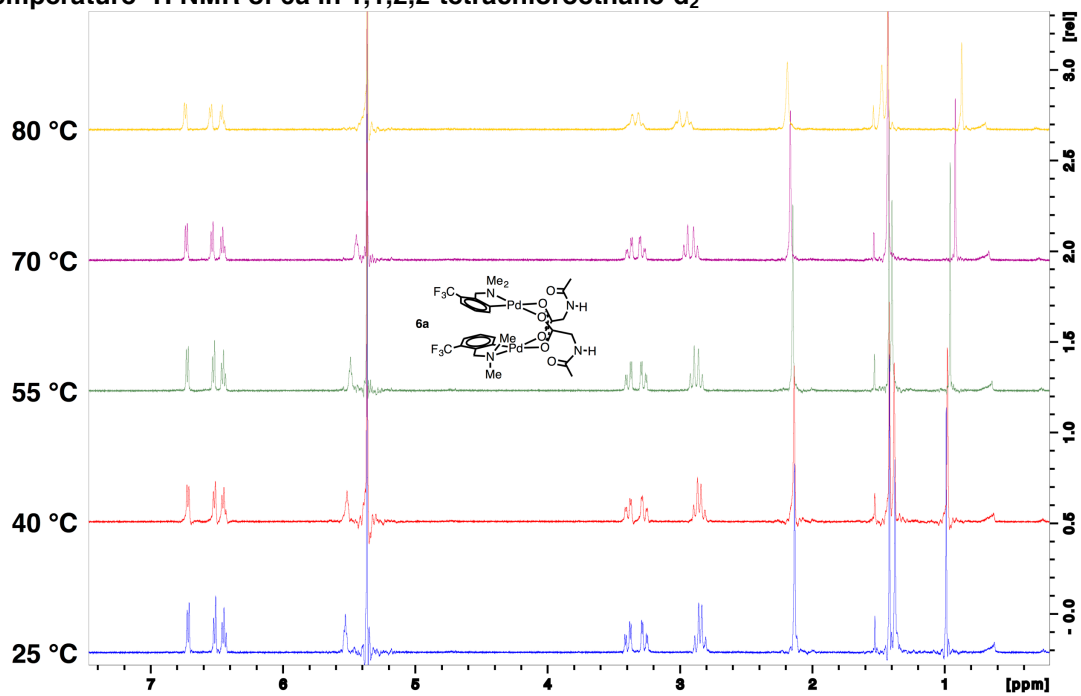

high temperature  $^{19}\text{F}$  NMR of 6a in 1,1,2,2-tetrachloroethane- $\text{d}_2$

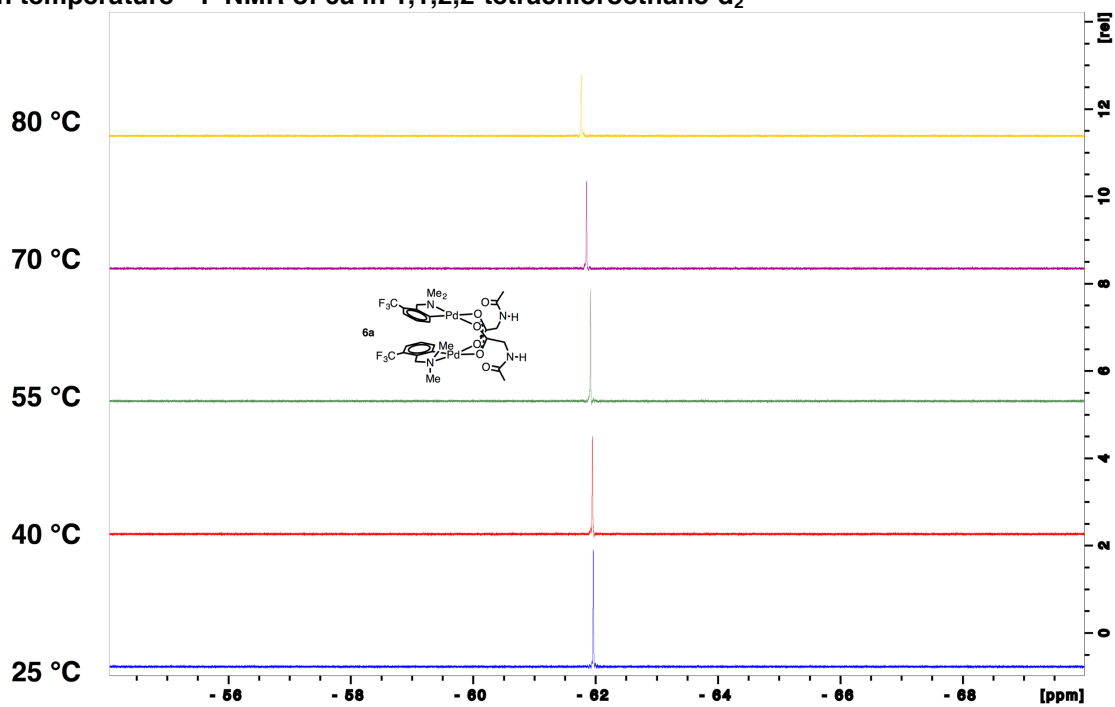

### <sup>1</sup>H NMR of homodimers 6a and 2 compared to mixture with heterodimer

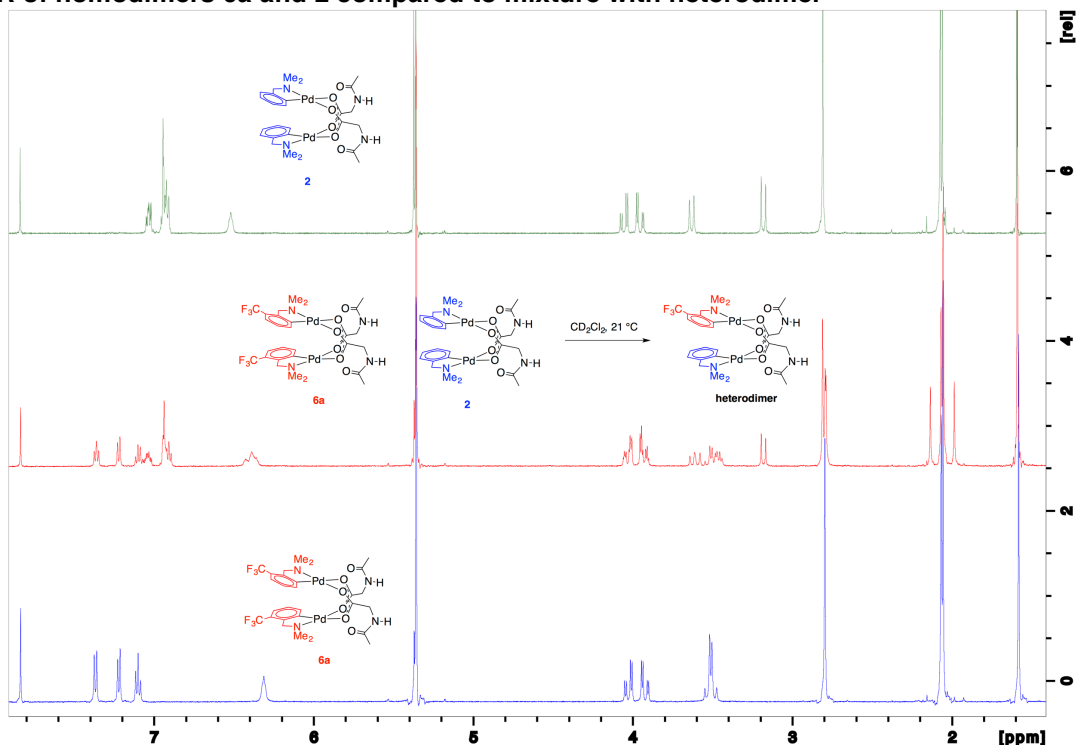

### <sup>19</sup>F NMR reaction progress of equilibration homodimers 6a and 2 to heterodimer

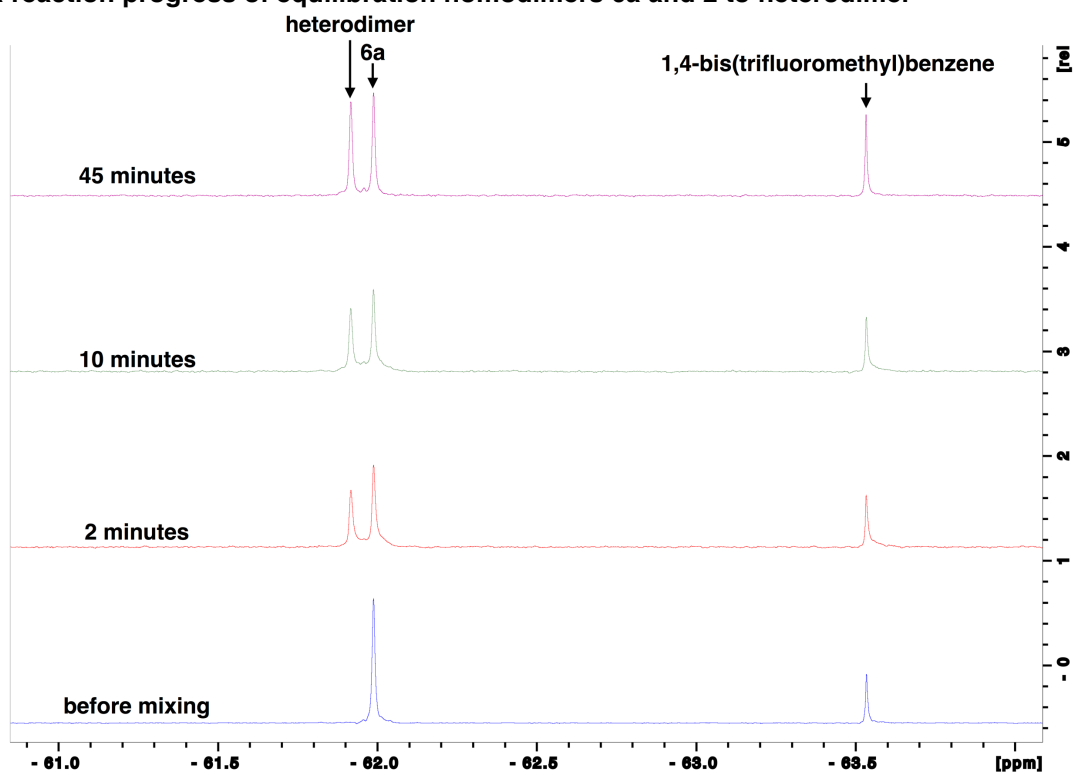

### Determination of homodimer/heterodimer exchange rate constant by $^{19}\text{F}$ EXSY

Complex 2 (7.13 mg, 10  $\mu\text{mol}$ ) and 10 micromoles of **6a** (8.49 mg, 10  $\mu\text{mol}$ ) were weighed into a 1 dram vial, dissolved in 600  $\mu\text{L}$   $\text{CD}_2\text{Cl}_2$  and transferred to a medium walled NMR tube. The tube was attached to cajon adaptor, degassed by 3 cycles of freeze pump thaw, and flame sealed. The sample was analyzed by  $^{19}\text{F}$  EXSY with mixing times ( $t_m$ ) varying from 100-800 ms. The volumes of the diagonal and cross peaks were used to solve for the rate constant ( $k$ ) according to equation (1).

$$(1) \quad k = \frac{1}{t_m} \ln \frac{r+1}{r-1}$$

where

$$(2) \quad r = 4X_A X_B \frac{I_{AA} + I_{BB}}{I_{AB} + I_{BA}} - (X_A - X_B)^2$$

and  $I_{AA}$  and  $I_{BB}$  correspond to the volumes of the three dimensional peak on the diagonals and  $I_{AB}$  and  $I_{BA}$  correspond to the volumes under the three dimensional cross peaks. Rate constants across the range of mixing times were in good agreement and were used to calculate  $\Delta G^\ddagger_{\text{exchange}}$  by the Eyring equation (3).

$$(3) \quad \Delta G^\ddagger_{\text{exchange}} = RT \left( \ln \frac{k_b T}{h} - \ln k \right)$$

### Rate constants and $\Delta G^\ddagger_{\text{exchange}}$ by $^{19}\text{F}$ EXSY at various $t_m$

| $t_m$ (ms)                                       | 100  | 200  | 400  | 600  | 800  | average |
|--------------------------------------------------|------|------|------|------|------|---------|
| k (1/ms)                                         | 71   | 50   | 54   | 51   | 48   | 54      |
| $\Delta G^\ddagger_{\text{exchange}}$ (kcal/mol) | 19.2 | 19.3 | 19.2 | 19.2 | 19.2 | 19.2    |

### Method of continuous variation (Job Plot) with homodimers **6a** and **2** to heterodimer

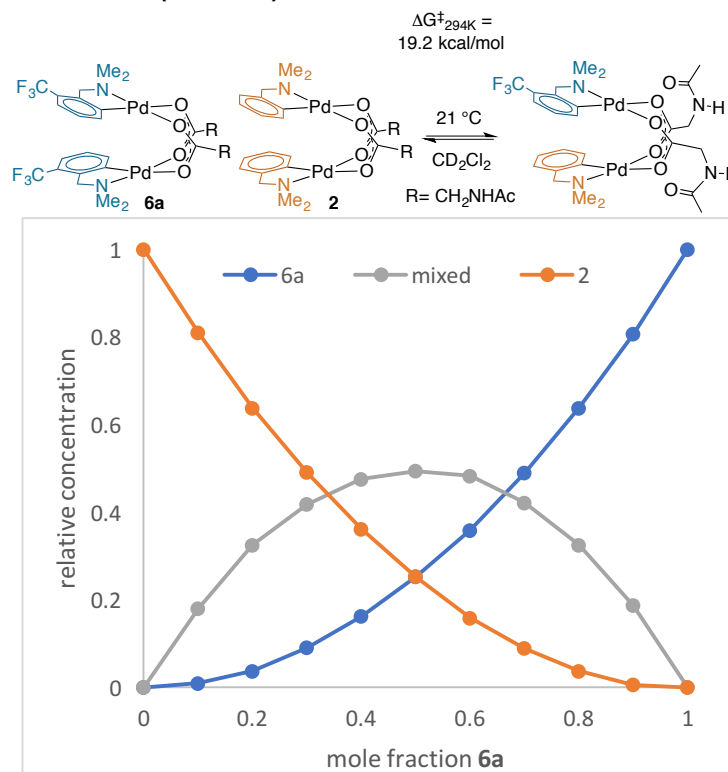

## Section S1.6: Pulse gradient spin echo experiments

### PGSE experimental description

PGSE<sup>17</sup> data were obtained on a Bruker DRX-500 spectrometer using the Stejskal-Tanner method. Two pulsed field gradients with duration  $\delta = 4$  ms separated by a delay time  $\Delta = 0.0151$  s were incorporated into a spin echo sequence with one before and the other after the 180 ° pulse. The gradient was calibrated with a sample of 2% H<sub>2</sub>O in D<sub>2</sub>O with a 2 mm teflon disk. <sup>1</sup>H NMR spectra were acquired in CD<sub>2</sub>Cl<sub>2</sub> at 294K without sample spinning. For each sample the gradient strength (G) was varied between 0 and 30 G/cm while keeping all other variables constant. The most upfield N-methyl resonance of each spectrum was integrated. The relative integrals are related to diffusion coefficient  $D$  by equation (1) ( $I_G$  = integral of a peak with applied gradient  $G$ ,  $I_0$  is the integral of the the peak with no gradient). According to equation (1) the slope of a plot of plot of  $\ln(I_G / I_0)$  vs  $G^2$  is proportional to the diffusion coefficient and thus inversely proportional to the hydrodynamic radius by the Stokes-Einstein equation (2). Relative diffusion coefficients were determined with respect to complex **7** by dividing the slope of the plots  $\ln(I_G / I_0)$  vs  $G^2$  for each sample by the slope of the plot for complex **7**. Relative hydrodynamic radii were thus given by the inverse of relative diffusion coefficients. Relative hydrodynamic volumes were determined from relative hydrodynamic radii by equation (3).

$$(1) \ln(I_G / I_0) = -[\gamma^2 \delta^2 G^2 (\Delta - \delta/3)] D$$

Where  $\gamma$  is the proton gyromagnetic ratio ( $2.675 \times 10^8 \text{ T}^{-1}\text{s}^{-1}$ ).

$$(2) D = (k_B T) / (6 \pi \eta r)$$

Where  $k_B$  is the Boltzmann constant;  $\eta$  is the viscosity of the solvent,  $T$  is temperature,  $r$  is the hydrodynamic radius of the molecule (approximated as a sphere).

$$(3) V = 4 \pi r^3$$

Good fits were found for each linear regression ( $R^2 = 0.9948$ - $0.9996$ ) made up of measurements at 10 different field strengths for each complex. The points at zero field strength were found to be anomalously variable and were not included in the fit used to determined the slope. Plots are normalized to give a y intercept near 0 to facilitate visualizing differences in slope.

### Table of PGSE results

| number           | <b>7</b>   | <b>7</b>   | <b>8</b>   | <b>9</b>   | <b>6a</b>  | <b>6b</b>  | <b>6c</b>  | <b>6d</b>  |
|------------------|------------|------------|------------|------------|------------|------------|------------|------------|
| ligand           | acac       | acac       | Cl         | OAc        | NAC-Gly    | NAC-Ala    | NAC-Leu    | NAC-Ile    |
| conc. (mM)       | 10         | 5          | 5          | 5          | 5          | 5          | 5          | 5          |
| slope            | -17.63     | -17.63     | -14.15     | -13.22     | -11.36     | -11.40     | -11.20     | -10.49     |
| $D_{\text{rel}}$ | 1.00       | 1.00       | 0.80       | 0.75       | 0.64       | 0.65       | 0.64       | 0.60       |
| $r_{\text{rel}}$ | 1.00       | 1.00       | 1.25       | 1.33       | 1.55       | 1.55       | 1.58       | 1.68       |
| $V_{\text{rel}}$ | <b>1.0</b> | <b>1.0</b> | <b>1.9</b> | <b>2.4</b> | <b>3.7</b> | <b>3.7</b> | <b>3.9</b> | <b>4.8</b> |

## Plot of PGSE slopes

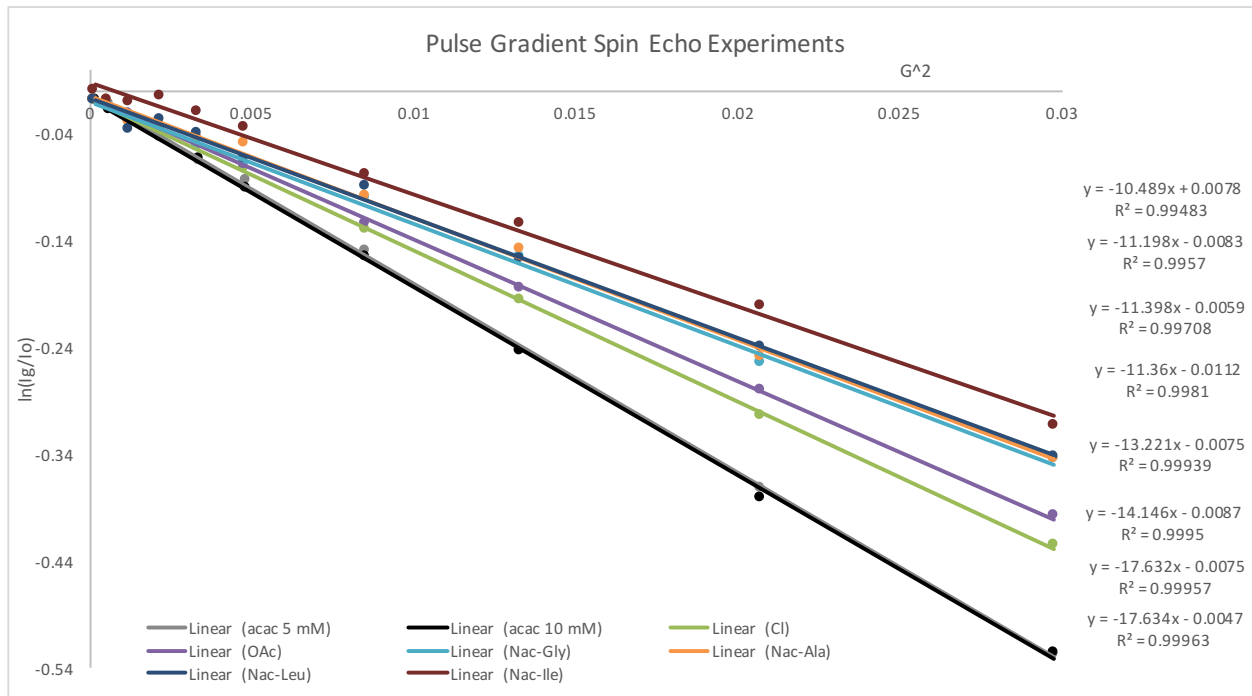

## Section S1.7: Effect of MPAA and base on rate of cyclopalladation

### reaction summary

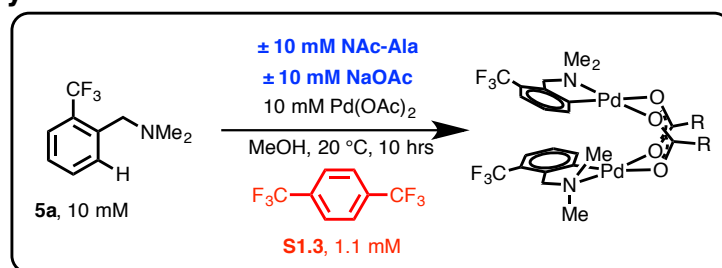

| reaction # | [Pd]  | [5a]  | [S1.3] | [NAc-Ala] | [NaOAc] |
|------------|-------|-------|--------|-----------|---------|
| 1          | 10 mM | 10 mM | 9.1 mM | 0 mM      | 0 mM    |
| 2          | 10 mM | 10 mM | 9.1 mM | 10 mM     | 0 mM    |
| 3          | 10 mM | 10 mM | 9.1 mM | 0 mM      | 10 mM   |
| 4          | 10 mM | 10 mM | 9.1 mM | 10 mM     | 10 mM   |

### experimental set up

Reactions for determining initial rates of cyclopalladation were prepared in four NMR tubes under air in parallel. Compounds were added using stock solutions prepared in volumetric flasks and dispensed from gas tight syringes. To each tube was added either 100  $\mu$ L of 80 mM NAc-Ala, 100  $\mu$ L of 80 mM NaOAc, both, or neither according to the table above. The each tube was diluted with an appropriate volume of methanol to bring the total volume to 200  $\mu$ L. A stock solution of palladium acetate in methanol-*d*<sub>4</sub> (16 mM) was prepared immediately before use (palladium acetate is known to slowly decompose in solutions of methanol).<sup>13</sup> The palladium(II) acetate stock solution (500  $\mu$ L) was added to all four tubes and the tubes were immediately flash frozen in liquid nitrogen. Each tube was initiated separately to allow for continuous monitoring during the initial rate portion of the reaction. To initiate, each tube was removed from the liquid nitrogen bath, allowed to thaw for 10 minutes at room temperature, at which time 100  $\mu$ L of a stock solution of **5a** 80 mM and 8.8 mM **S1.3** in methanol was added, the tube was shaken to mix, and a stopwatch was started. The sample was walked to the NMR spectrometer and the delay time between initiation and data acquisition was noted. Spectra were acquired at 17 second intervals during the initial rates portion of the reaction and the reactions were monitored periodically until all starting material was consumed. Starting material and product concentrations were determined with respect to 1.1 mM **S1.3** internal standard. Error bars are the standard deviation of the slope of linear regression fit. Bakmutov, V. I.; Berry, J. F.; Cotton, F. A.; Ibragimov, S. Dalton Trans., 2005, 1989-1992

### bar graph comparing initial rates of starting material consumption

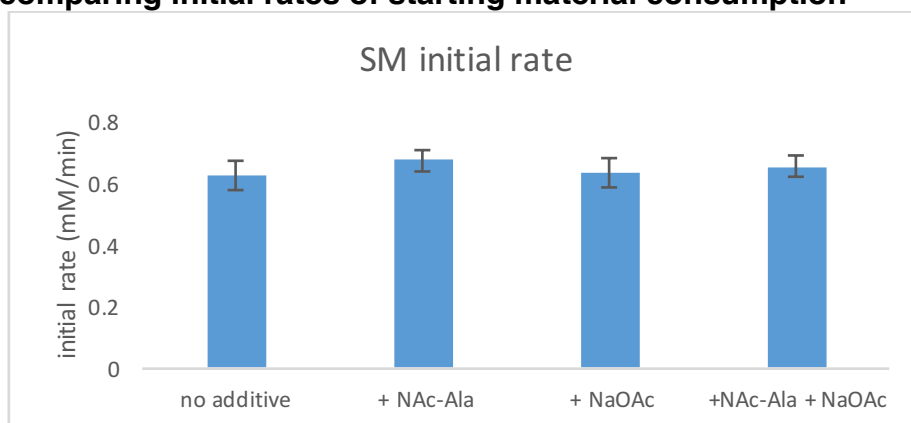

### bar graph comparing initial rates of product formation

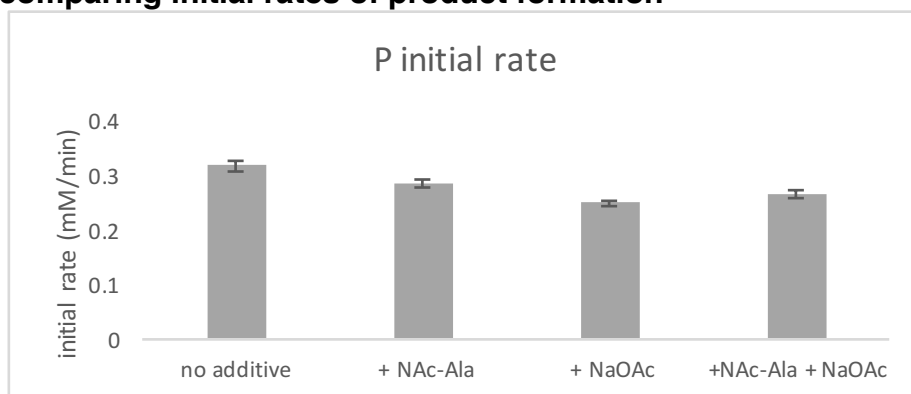

### overlaid plots of reaction progress in initial rates portion of reaction

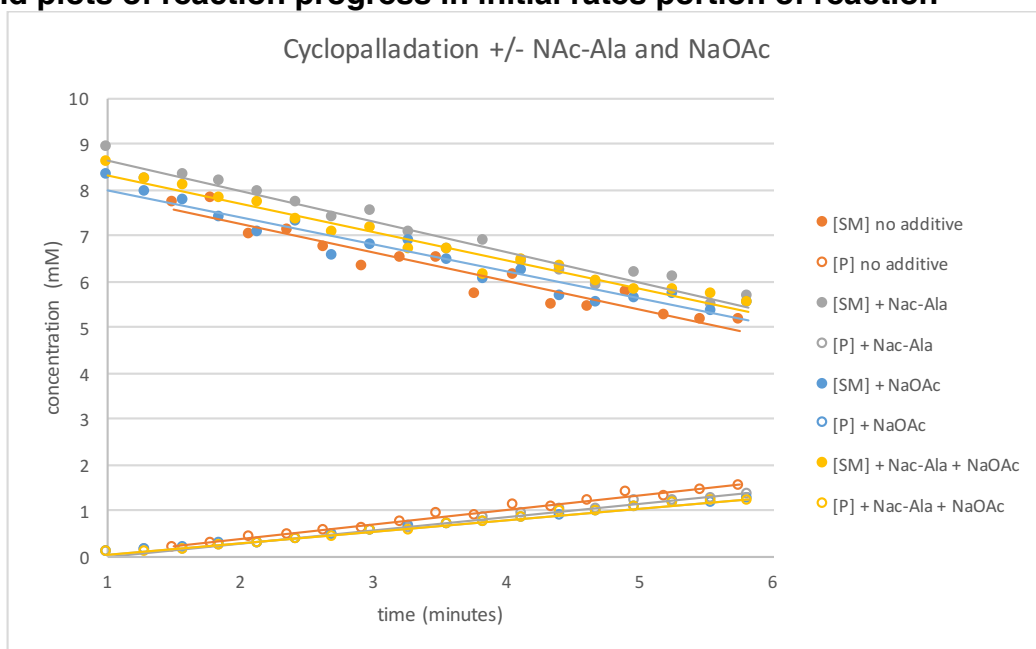



### overlaid plots of reaction progress in first 60 minutes of reaction

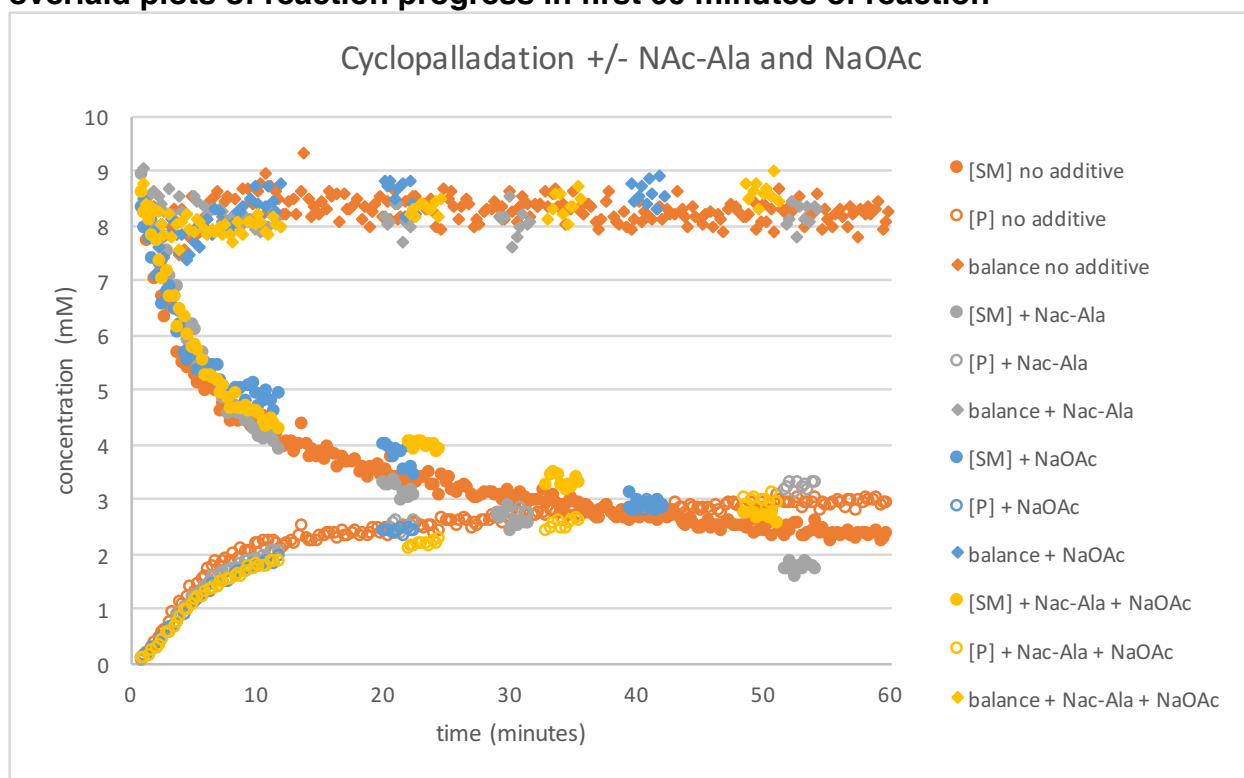

### overlaid plots of reaction progress over full reaction

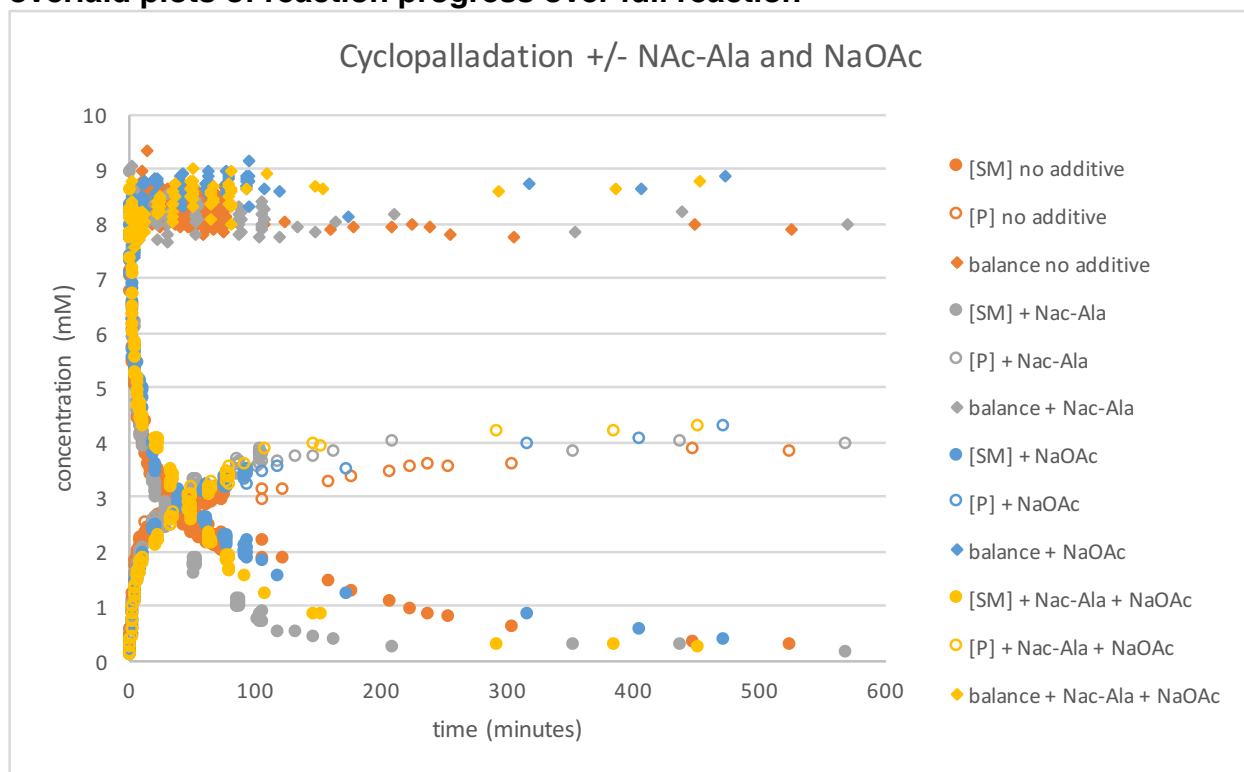

### stacked spectra with no additive

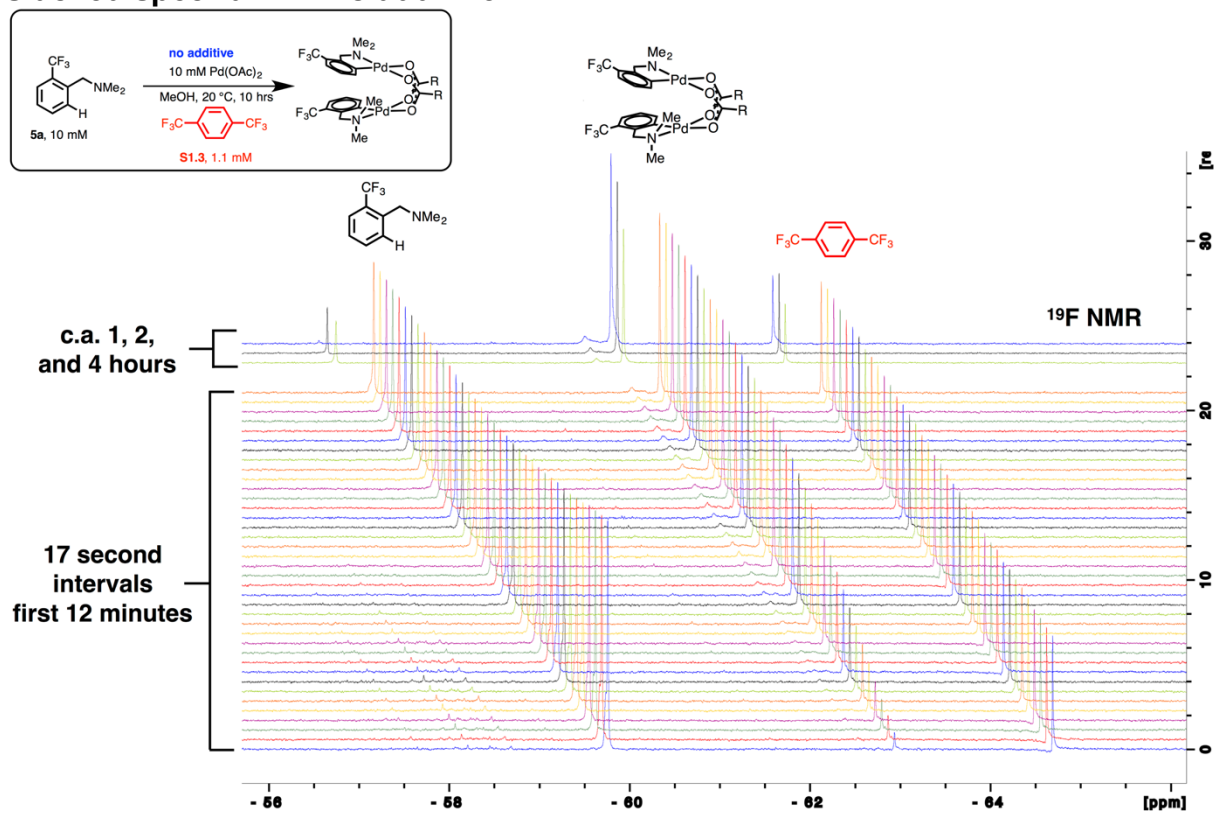

### stacked spectra with MPAA additive

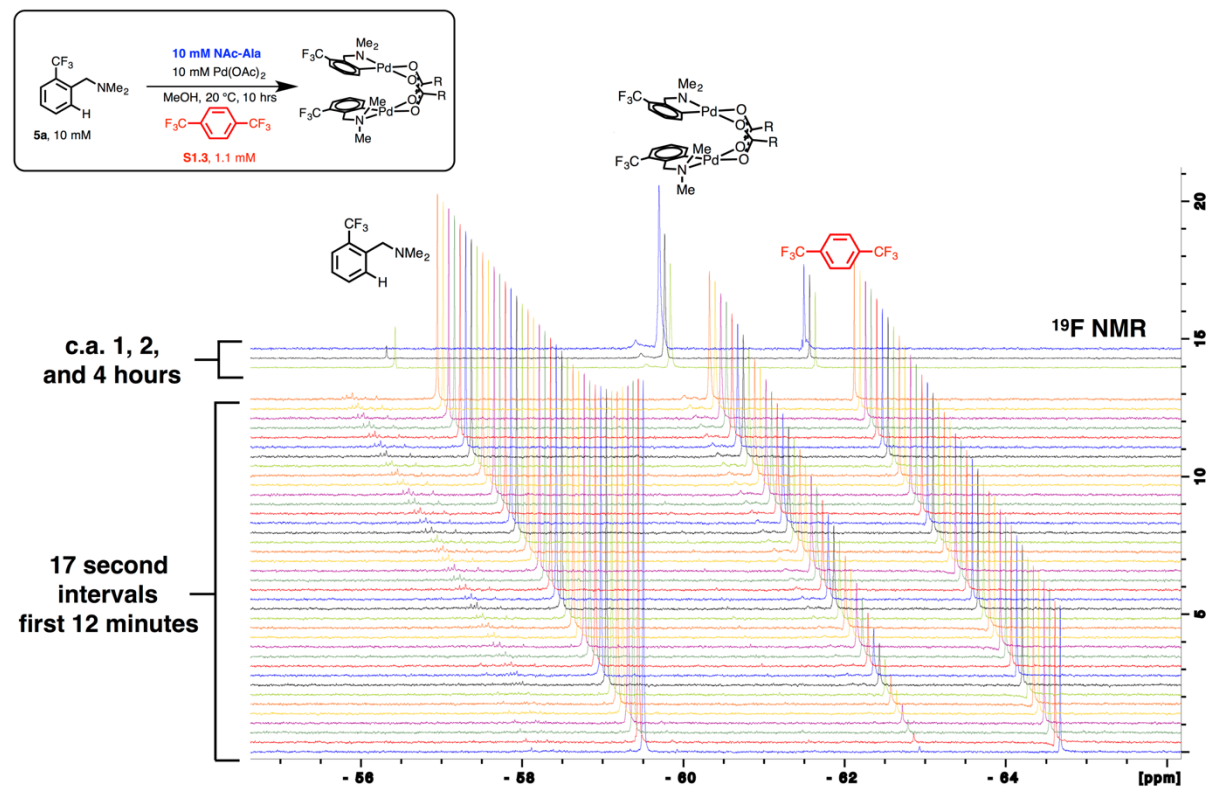

### stacked spectra with sodium acetate

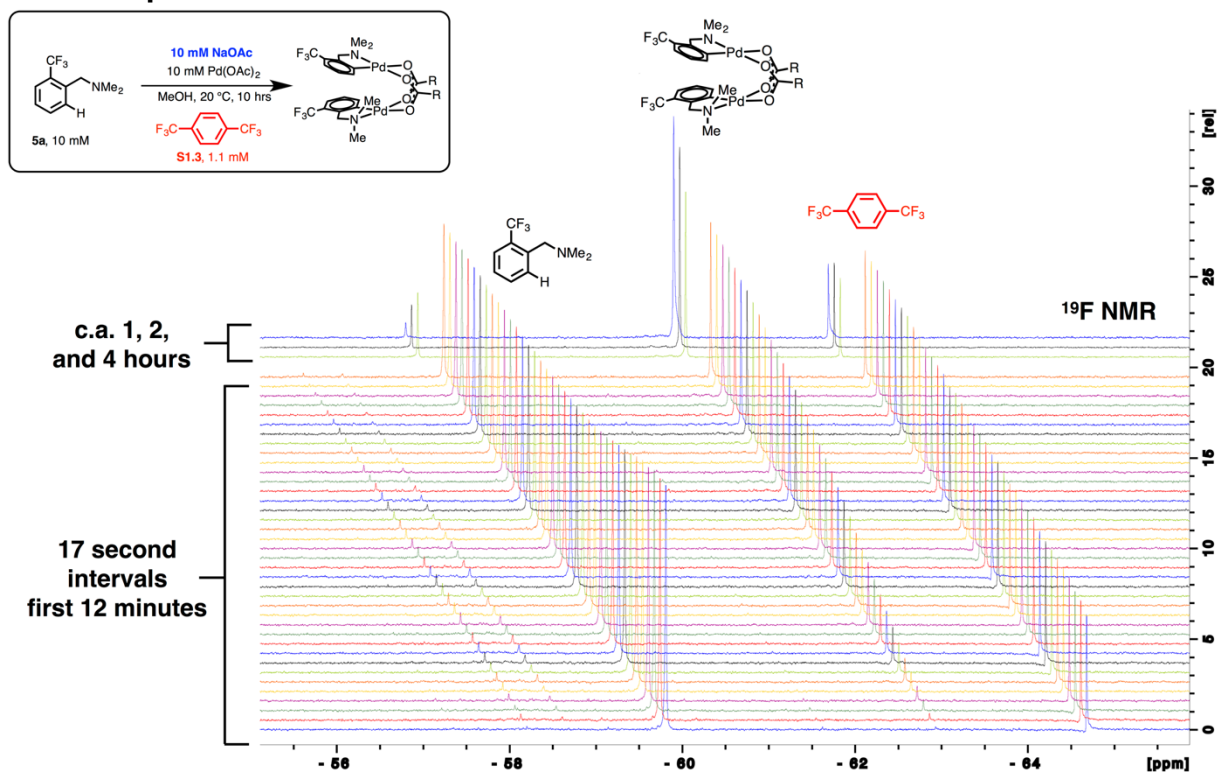

### stacked spectra with MPAA additive and sodium acetate

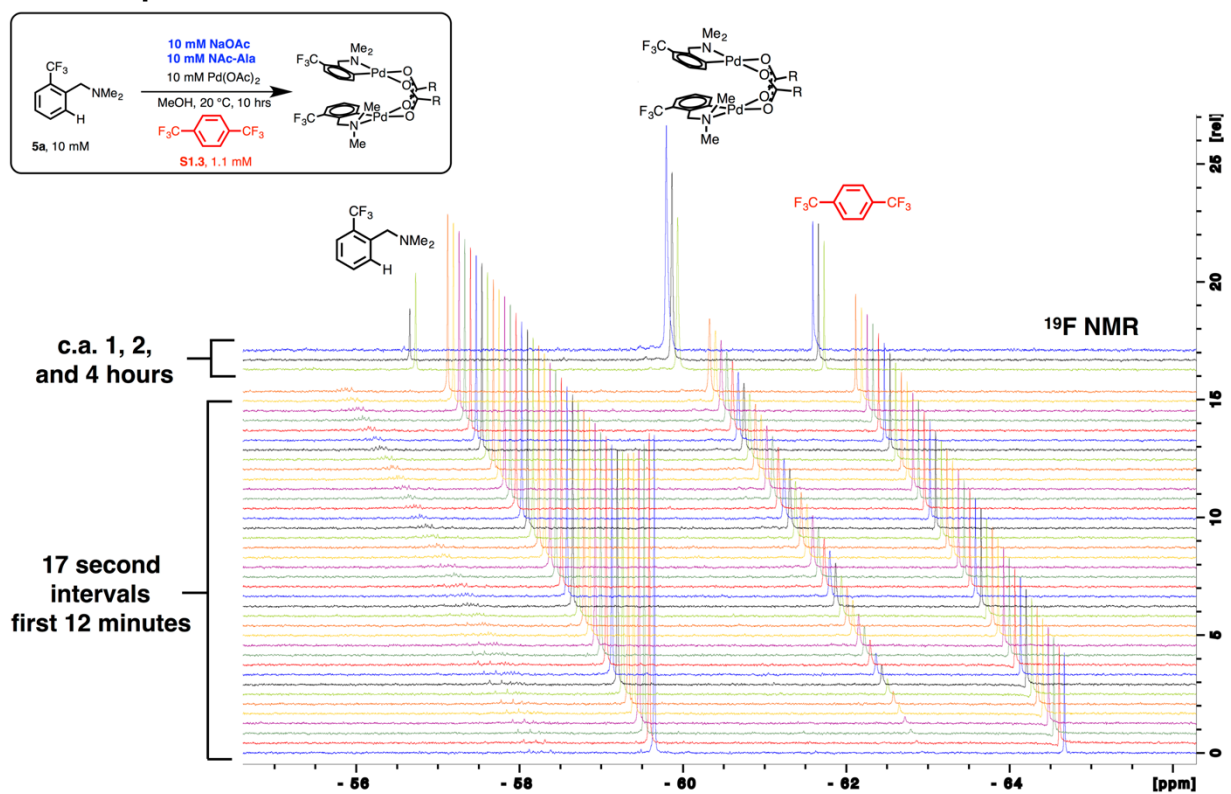

## Section S1.8: Acetate/MPAA exchange equilibria

### procedure for displacing acetate with MPAA's

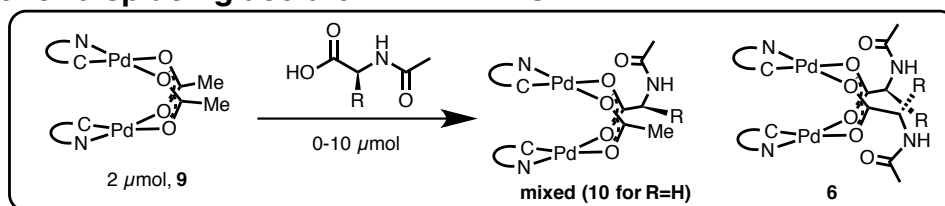

To 8 vials in parallel was added by gas tight syringe a stock solution in methanol of MPAA (15 mM) (MPAA = NAc-Gly, NAc-Ala, or NAc-Ile). Each vial was diluted with (800-*n*) μL methanol to bring the total volume to 800 μL. To each vial was added a stock solution of **9** (10 mM, 200 μL, 2 μmol). The vials were capped, shaken, and left for 8 hours at room temperature at which time the caps were loosened, the samples were flash frozen in liquid nitrogen, and frozen methanol was removed at room temperature in a vacuum chamber. To each of the vials was added a stock solution in CD<sub>2</sub>Cl<sub>2</sub> of internal standard **S1.3** (20 mM, 50 μL, 1 μmol) followed by 600 μL of CD<sub>2</sub>Cl<sub>2</sub>. The samples were dissolved by agitation with a glass pipette and transferred to an NMR tube for analysis by <sup>19</sup>F NMR.

Exchange equilibria were conducted in methanol because methanol is required to prepare sufficiently concentrated stock solutions of MPAA's; however, the <sup>19</sup>F NMR spectra of the complexes in equilibrium are broad and overlapping in methanol. Thus, the reactions were conducted in methanol and analyzed in CD<sub>2</sub>Cl<sub>2</sub>, which results in resolvable peaks in <sup>19</sup>F NMR spectra of **6a**, **9**, and **10**, but prevents determination of quantitative equilibrium constants.

| vial #      | 1 | 2   | 3   | 4   | 5   | 6   | 7   | 8   |
|-------------|---|-----|-----|-----|-----|-----|-----|-----|
| <i>n</i>    | 0 | 133 | 200 | 267 | 333 | 400 | 533 | 667 |
| [MPAA] (mM) | 0 | 2   | 3   | 4   | 5   | 6   | 8   | 10  |
| [9] (mM)    | 2 | 2   | 2   | 2   | 2   | 2   | 2   | 2   |

### Figure S1.1: <sup>19</sup>F NMR comparison of acetate displaced by MPAA's

Note that for NAc-Gly there is always some small amount of starting material **9** and mixed complex **10** present, even with excess MPAA. In contrast, NAc-Ala and NAc-Ile drive the equilibrium to no observable starting material (**9**) and very little or no mixed complex, indicating more MPAA bound.

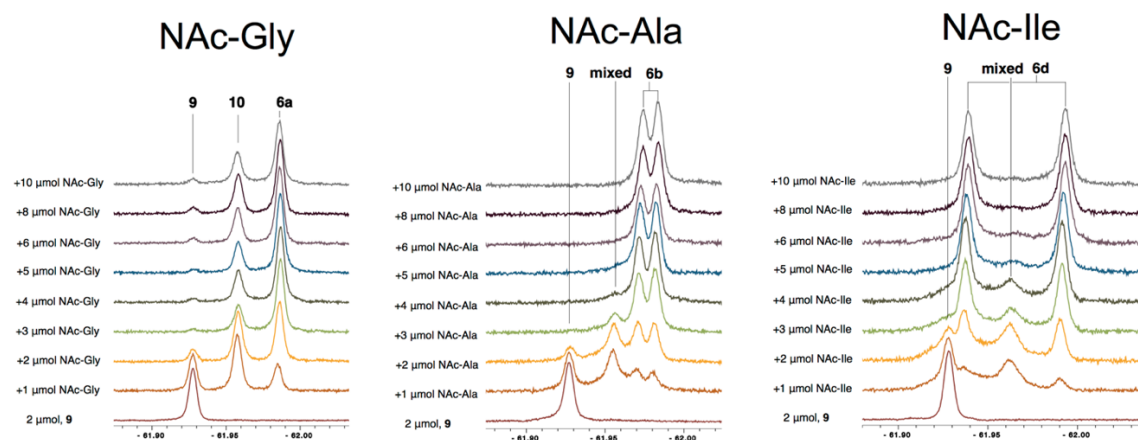

## procedure for displacing NAc-Gly with acetate

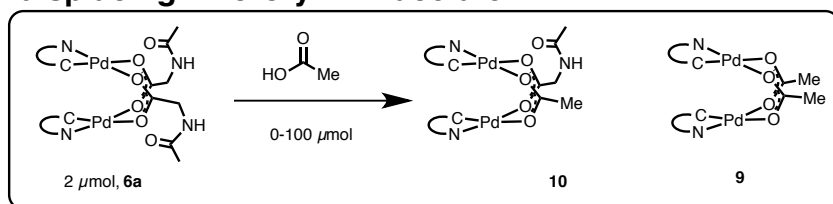

To each of 11 vials in parallel was added by gas tight syringe a stock solution in methanol of acetic acid (200 mM,  $n$  μL,  $0.2n$  μmol) (MPAA = NAc-Gly, NAc-Ala, or NAc-Ile). Each vial was diluted with  $(500-n)$  μL methanol to bring the total volume to 500 μL. To each vial was added a stock solution of **6a** (4 mM, 500 μL, 2 μmol). The vials were capped, shaken, and left for 8 hours at room temperature at which time the caps were loosened, the samples were flash frozen in liquid nitrogen, and frozen methanol was removed at room temperature in a vacuum chamber. To each of the vials was added a stock solution in CD<sub>2</sub>Cl<sub>2</sub> of internal standard **S1.3** (20 mM, 50 μL, 1 μmol) followed by 600 μL of CD<sub>2</sub>Cl<sub>2</sub>. The samples were dissolved by agitation with a glass pipette and transferred to an NMR tube for analysis by <sup>19</sup>F NMR.

| vial #      | 1 | 2 | 3  | 4  | 5  | 6  | 7  | 8  | 9   | 10  | 11  |
|-------------|---|---|----|----|----|----|----|----|-----|-----|-----|
| $n$         | 0 | 5 | 10 | 15 | 20 | 25 | 40 | 50 | 100 | 250 | 500 |
| [AcOH] (mM) | 0 | 1 | 2  | 3  | 4  | 5  | 8  | 10 | 20  | 50  | 100 |
| [6a] (mM)   | 2 | 2 | 2  | 2  | 2  | 2  | 2  | 2  | 2   | 2   | 2   |

## comparing <sup>19</sup>F NMR spectra of forward and reverse carboxylate exchange

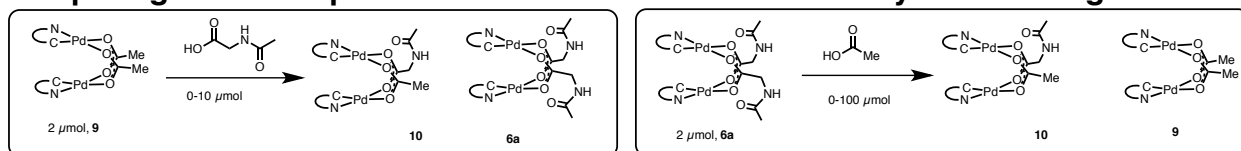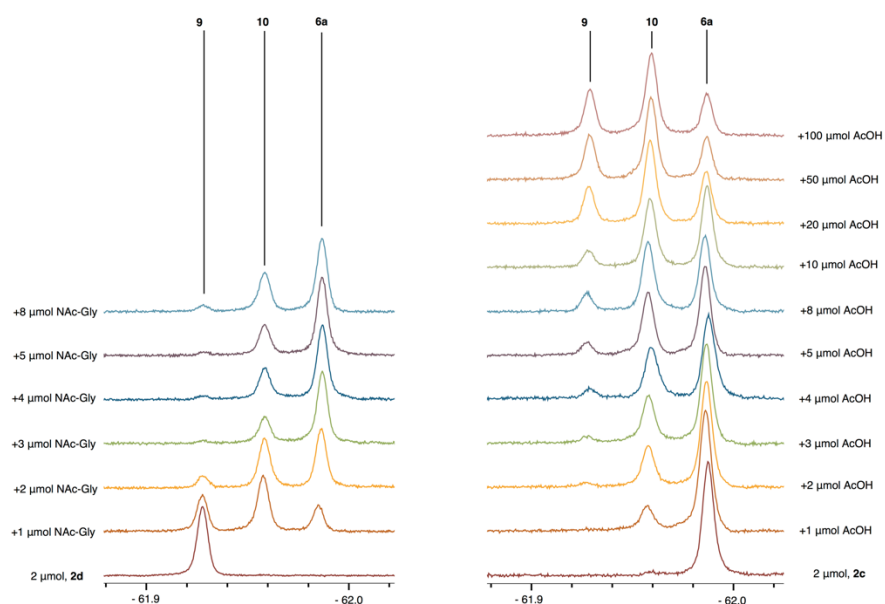

## Section S1.9: Scope of MPAA palladacycle functionalization

Yields of stoichiometric palladacycle functionalization reactions are reported with respect to one equivalent of dimeric complex as has been the practice in recent papers on C-H activation and C-H functionalization with acetate bridged palladacycles.<sup>1,10,14,15</sup>

Powers, D. C.; Xiao, D. Y.; Geibel, M. A. L.; Ritter, T. *J. Am. Chem. Soc.* **2010**, *132* (41), 14530.

Powers, D. C.; Geibel, M. A. L.; Klein, J. E. M. N.; Ritter, T. *J. Am. Chem. Soc.* **2009**, *131* (47), 17050.

Powers, D. C.; Benitez, D.; Tkatchouk, E.; Goddard, W. A., III; Ritter, T. *J. Am. Chem. Soc.* **2010**, *132* (40), 14092.

Powers, D. C.; Ritter, T. *Nature Chemistry* **2009**, *1* (4), 302.

### Iodination

To an NMR tube was added a stock solution in  $\text{CD}_2\text{Cl}_2$  of **6b** (7.5 mM, 500  $\mu\text{L}$ , 3.75  $\mu\text{mol}$ ), followed by a stock solution in  $\text{CH}_2\text{Cl}_2$  of **S1.3** (30 mM, 50  $\mu\text{L}$ , 1.5  $\mu\text{mol}$ ), followed by a stock solution in  $\text{CH}_2\text{Cl}_2$  of iodine (37.5 mM, 200  $\mu\text{L}$ , 7.5  $\mu\text{mol}$ , 2 equiv.). The tube was capped, shaken, and left at room temperature for 17 h at which time it was analyzed by  $^{19}\text{F}$  NMR and the concentration of the desired product was determined with respect to **S1.3**. The formation of the **5d** was confirmed by spiking independently synthesized **5d** into the mixture. GCMS analysis of the reaction mixture showed one major product which had the same m/z and retention time as independently synthesized **5d**.

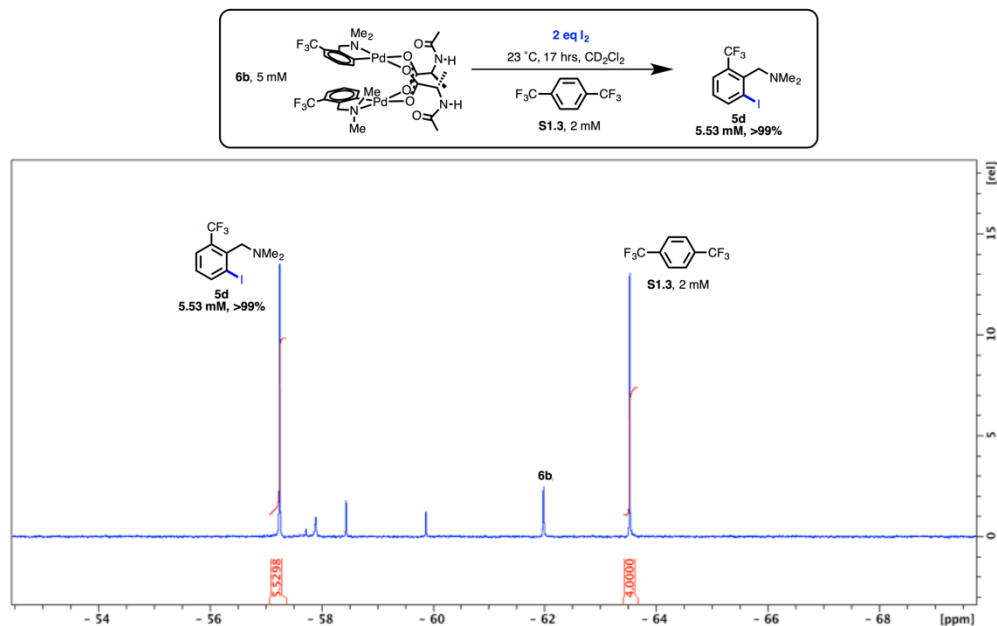

## Bromination

To an NMR tube was added a stock solution in  $\text{CD}_2\text{Cl}_2$  of **6b** (7.5 mM, 500  $\mu\text{L}$ , 3.75  $\mu\text{mol}$ ), followed by a stock solution in  $\text{CH}_2\text{Cl}_2$  of **S1.3** (30 mM, 50  $\mu\text{L}$ , 1.5  $\mu\text{mol}$ ), followed by a stock solution in  $\text{CH}_2\text{Cl}_2$  of bromine (22.5 mM, 200  $\mu\text{L}$ , 4.5  $\mu\text{mol}$ , 1.2 equiv.). The tube was capped, shaken, and left at room temperature for 17 h at which time it was analyzed by  $^{19}\text{F}$  NMR and the concentration of the desired product was determined with respect to **S1.3**. GCMS analysis of the reaction mixture showed one major product which had the same m/z and retention time as independently synthesized **5c**.

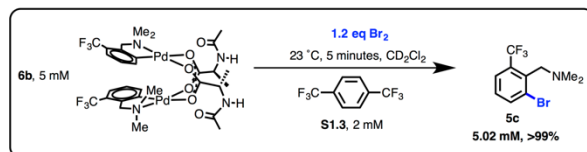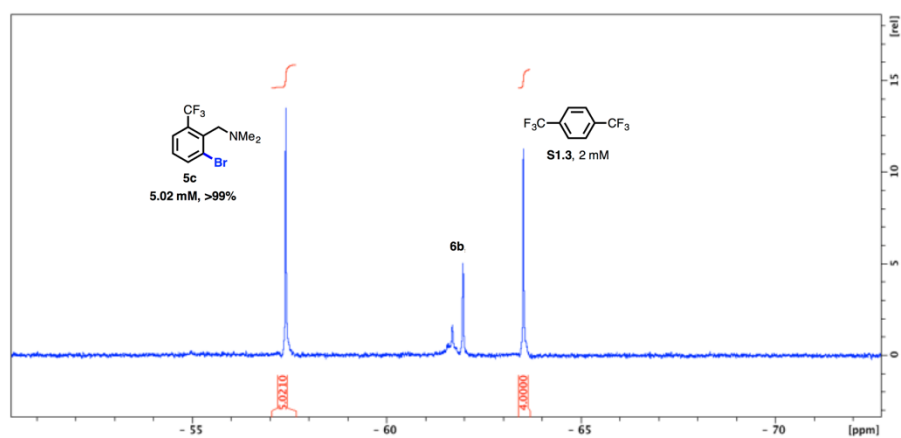



## Relative rates of iodination and bromination

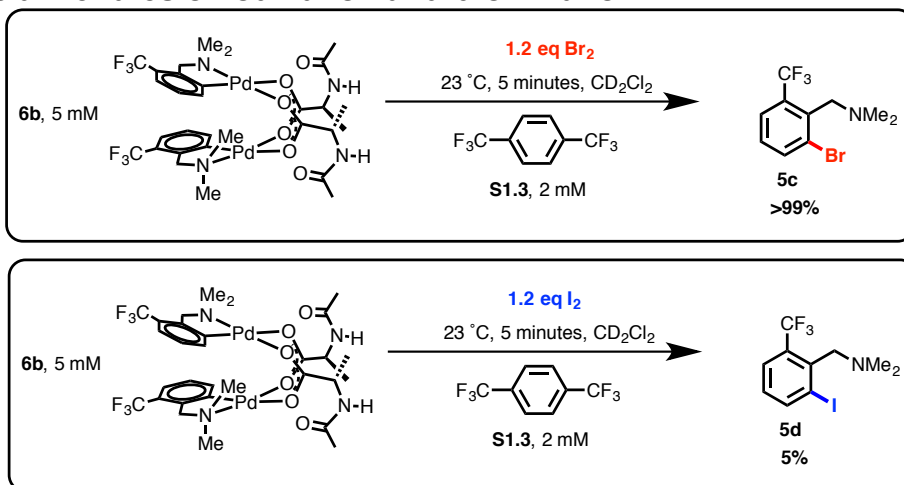

To an NMR tube was added a stock solution in  $\text{CD}_2\text{Cl}_2$  of **6b** (7.5 mM, 500  $\mu\text{L}$ , 3.75  $\mu\text{mol}$ ) followed by a stock solution in  $\text{CH}_2\text{Cl}_2$  of **S1.3** (30 mM, 50  $\mu\text{L}$ , 1.5  $\mu\text{mol}$ ). The tube was sealed with a rubber septum, brought to the NMR spectrometer, locked, and shimmed. The sample was ejected from the spectrometer, and through the rubber septum was injected a stock solution in  $\text{CH}_2\text{Cl}_2$  of  $\text{X}_2$  ( $\text{X}=\text{Br}$  or  $\text{I}$ ) (22.5 mM, 200  $\mu\text{L}$ , 4.5  $\mu\text{mol}$ , 1.2 equiv.). The sample was shaken and lowered into the spectrometer immediately. The reaction was monitored by  $^{19}\text{F}$  NMR at 15 second intervals over 20 minutes the concentration of the desired products was determined with respect to **S1.3**.

**Figure S1.2: palladacycle bromination proceeds more rapidly than iodination**  
note that scales on y axis are different for iodination and bromination

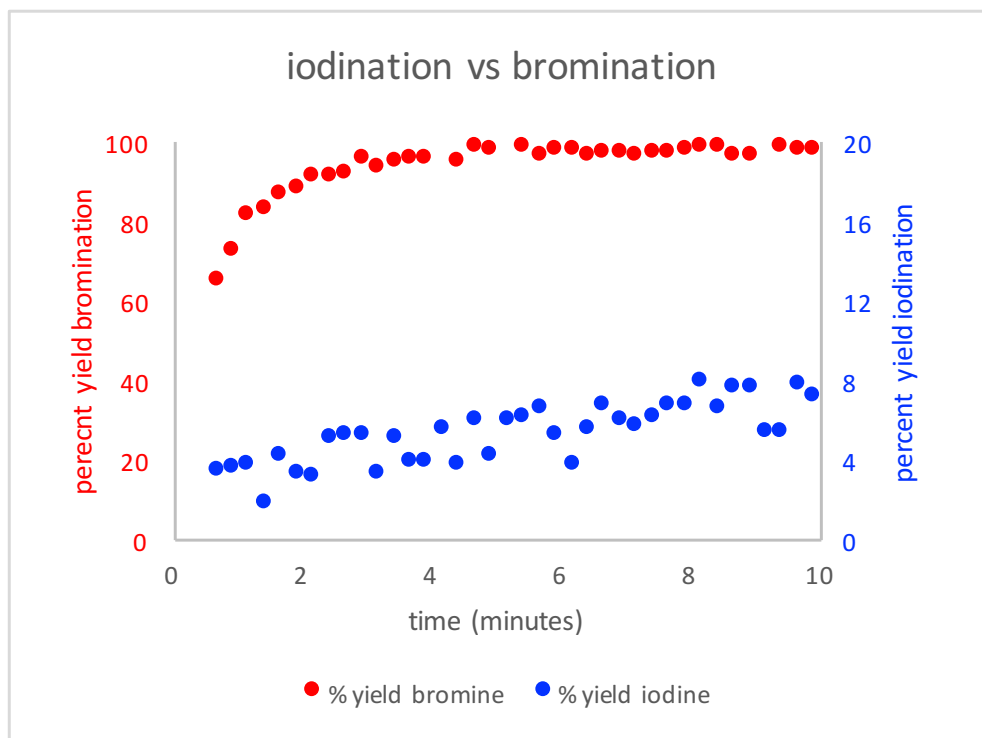



## Chlorination with 2 equiv. oxidant

To an NMR tube was added a stock solution in  $\text{CD}_2\text{Cl}_2$  of **6b** (7.5 mM, 500  $\mu\text{L}$ , 3.75  $\mu\text{mol}$ ), followed by a stock solution in  $\text{CH}_2\text{Cl}_2$  of **S1.3** (30 mM, 50  $\mu\text{L}$ , 1.5  $\mu\text{mol}$ ), followed by a stock solution in  $\text{CH}_2\text{Cl}_2$  of iodobenzene dichloride (37.5 mM, 200  $\mu\text{L}$ , 7.5  $\mu\text{mol}$ , 2 equiv.). The tube was capped, shaken, and left at room temperature for 30 minutes at which time it was analyzed by  $^{19}\text{F}$  NMR and the concentration of the desired product was determined with respect to **S1.3**. GCMS analysis of the reaction mixture showed one major product which had the same  $m/z$  and retention time as independently synthesized **5b**.

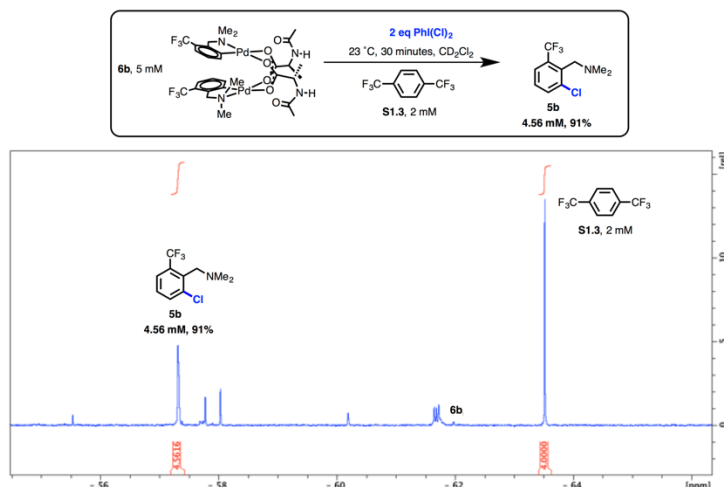

## Chlorination with 5 equiv. oxidant

To an NMR tube was added a stock solution in  $\text{CD}_2\text{Cl}_2$  of **6b** (7.5 mM, 500  $\mu\text{L}$ , 3.75  $\mu\text{mol}$ ), followed by a stock solution in  $\text{CH}_2\text{Cl}_2$  of **S1.3** (30 mM, 50  $\mu\text{L}$ , 1.5  $\mu\text{mol}$ ), followed by a stock solution in  $\text{CH}_2\text{Cl}_2$  of iodobenzene dichloride (93.75 mM, 200  $\mu\text{L}$ , 18.75  $\mu\text{mol}$ , 5 equiv.). The tube was capped, shaken, and left at room temperature for 30 minutes at which time it was analyzed by  $^{19}\text{F}$  NMR and the concentration of the desired product was determined with respect to **S1.3**. Further monitoring of the reaction mixture revealed decreasing concentration of **5b** and a new species developing. The mixture was transferred to a 1 dram vial and left uncapped overnight. Slow evaporation of  $\text{CH}_2\text{Cl}_2$  afforded singled crystals of a known coordination polymer with the formula  $\text{PdCl}_2 + \text{HCl} + \text{HNMe}_2$ . See crystallographic section for details.

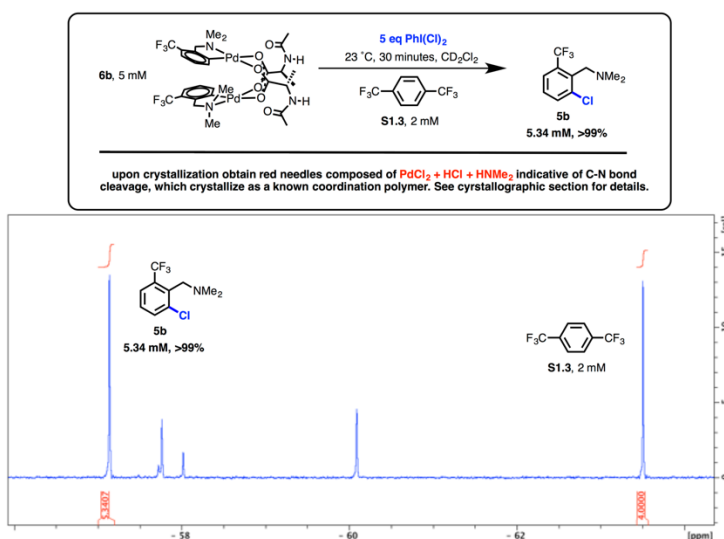

## Olefination in trifluoroethanol

MCAA complex **2** (10  $\mu\text{mol}$ , 7.1 mg, 1 equiv.) was weighed into a 1 mL vial and transferred as a solid into an NMR tube with a J. Young cap, vial was washed with two 250  $\mu\text{L}$  portion of trifluoroethanol. Internal standard 1,2,4,5-tetrachloro-benzene (10  $\mu\text{mol}$ , 2.15 mg, 1 equiv.) was added to the NMR tube in the same way. n-Butyl acrylate (400  $\mu\text{mol}$ , 51.3 mg, 57  $\mu\text{L}$ , 40 equiv.) was added by gas tight syringe. The J. Young cap was sealed and the tube placed in an 80  $^{\circ}\text{C}$  oil bath. The reaction was monitored hourly, but precipitation of Pd black led to poor line shapes. After 4 hours, the sample was removed from the oil bath, transferred to a 20 mL scintillation vial and the volatiles were removed under reduced pressure. The reaction mixture was dissolved in  $\text{CDCl}_3$  and the yield of **14** was determined by  $^1\text{H}$  NMR (which matched the spectrum for this compound reported in the literature, see ref. 16) by integration of the most downfield proton with respect to internal standard.

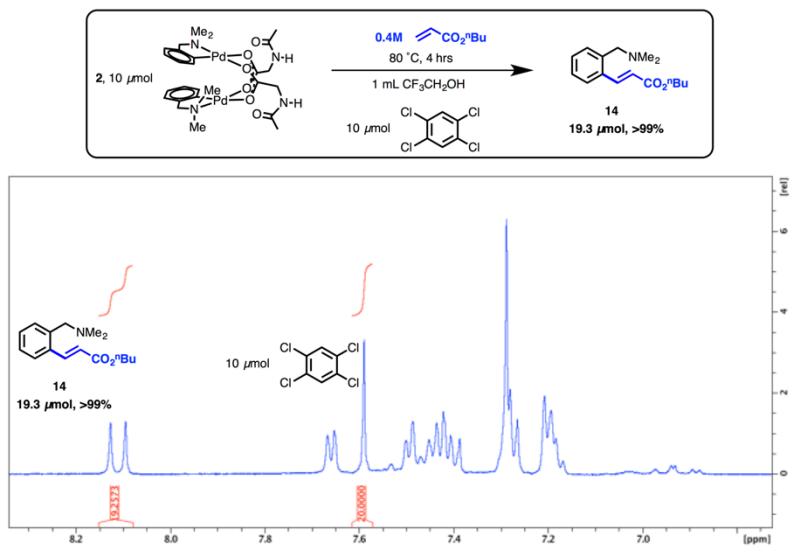

## Olefination in 1,2-dichloroethane

MCAA complex **2** (10  $\mu\text{mol}$ , 7.1 mg, 1 equiv.) was weighed into a 1 mL vial and transferred as a solid into an NMR tube with a J. Young cap, vial was washed with two 250  $\mu\text{L}$  portion of 1,2-dichloroethane. Internal standard 1,2,4,5-tetrachloro-benzene (10  $\mu\text{mol}$ , 2.15 mg, 1 equiv.) was added to the NMR tube in the same way. n-Butyl acrylate (400  $\mu\text{mol}$ , 51.3 mg, 57  $\mu\text{L}$ , 40 equiv.) was added by gas tight syringe. The J. Young cap was sealed and the tube placed in an 80  $^{\circ}\text{C}$  oil bath. The reaction was monitored hourly, but precipitation of Pd black led to poor line shapes. After 42 hours, the sample was removed from the oil bath, transferred to a 20 mL scintillation vial and the volatiles were removed under reduced pressure. The reaction mixture was dissolved in  $\text{CDCl}_3$  and the yield of **14** was determined by  $^1\text{H}$  NMR by integration of the most downfield proton with respect to internal standard.

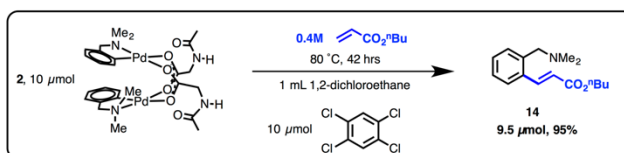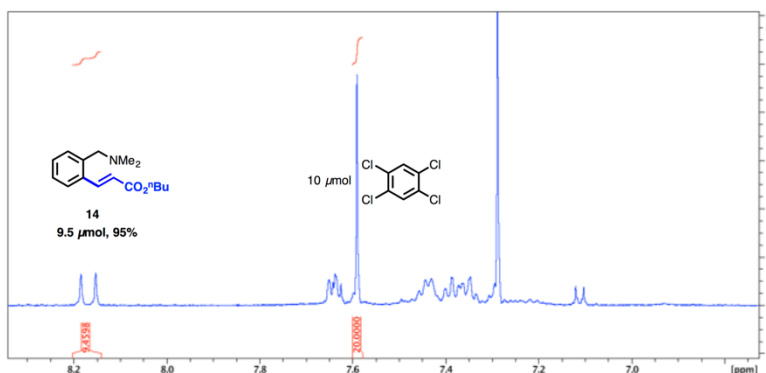

## Section S1.10: Reaction of complex **2** with iodobenzene dichloride

### Reaction with 1.2 equiv. iodobenzene dichloride

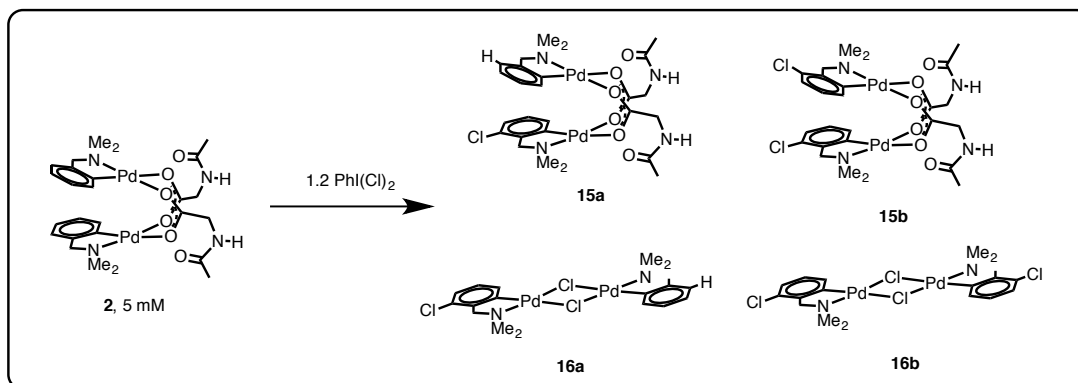

To an NMR tube was added a stock solution in  $\text{CD}_2\text{Cl}_2$  of **2** (10 mM, 500  $\mu\text{L}$ , 5  $\mu\text{mol}$ , 1 equiv.) and a stock solution in  $\text{CD}_2\text{Cl}_2$  of **S1.3** (20 mM, 50  $\mu\text{L}$ , 1  $\mu\text{mol}$ , 0.20 equiv.) and an additional 225  $\mu\text{L}$  of  $\text{CD}_2\text{Cl}_2$ . The sample was brought to the NMR spectrometer, locked, shimmed, ejected from the instrument, injected with a stock solution in  $\text{CD}_2\text{Cl}_2$  of iodobenzene dichloride (26.7 mM, 225  $\mu\text{L}$ , 6  $\mu\text{mol}$ , 1.2 equiv.), shaken, and inserted into the instrument. A spectrum was acquired every 2 minutes for the first 16 minutes of the reaction and the reaction was monitored periodically until the reaction stopped changing at 24 h. The sample was poured into a 1 dram vial which was nested in a 20 mL scintillation vial. Overnight, a small amount of yellow powder developed on the glass of the vial where the solvent was evaporating. The mother liquor was poured into a separate vial and the yellow powder was analyzed and revealed a mixture of products consistent with **15a** and **15b**. The vial containing the mother liquor was nested in a 20 mL vial with 2 mL of pentane in the larger vial. Overnight, yellow, block shaped crystals suitable for x-ray diffraction grew and gave a crystal structure consistent with a mixture of mono and dichlorinated MPAA bridged palladacycles **15a** and **15b**. The yellow blocks were characterized by  $^1\text{H}$  NMR was consistent with a mixture of **15a** + **15b** (see NMR of mixture). The supernatant from which the yellow blocks grew was decanted into a separate 1 dram vial and overnight, yellow needles suitable for x-ray diffraction grew as well as additional yellow blocks which were removed manually. Analysis of the yellow needles by x-ray diffraction was consistent with a mixture of non, mono, and dichlorinated chloride bridged MPAA complexes **16a** and **16b**. An NMR of the yellow needles that were characterized by x-ray diffraction were also consistent with a mixture of **16a** and **16b**.

Reaction progress by  $^1\text{H}$  NMR

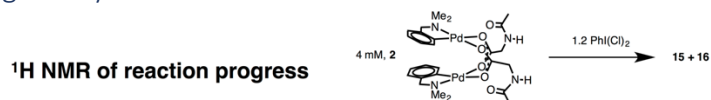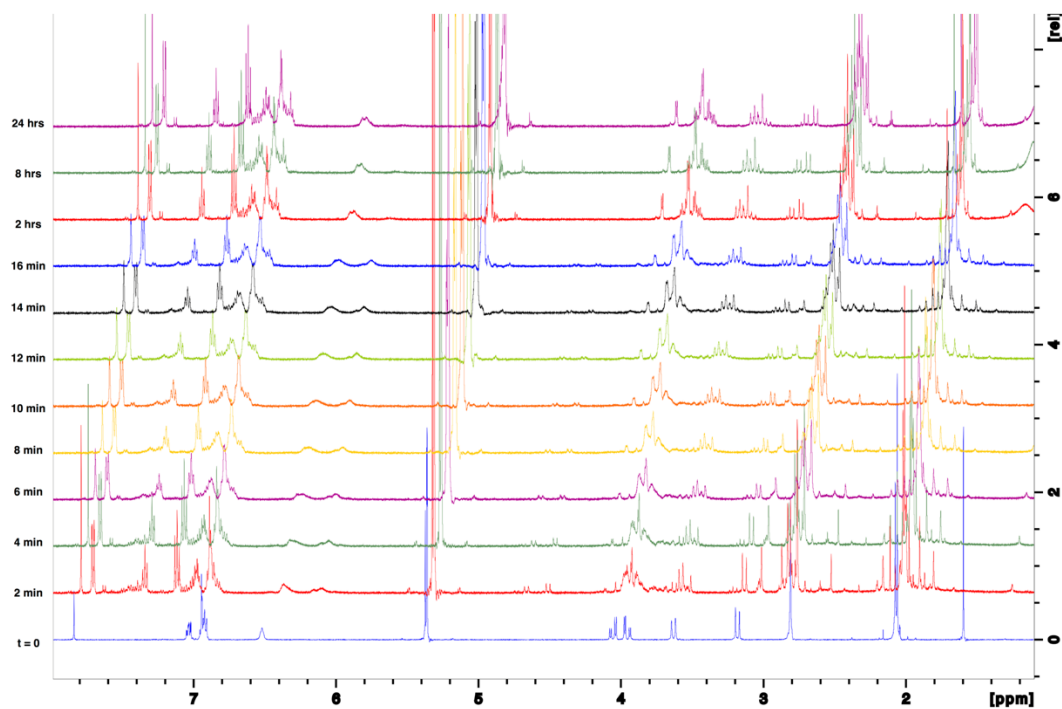

Comparison of  $^1\text{H}$  NMR of MPA complex **2** with isolated mixture of **15a** and **15b**

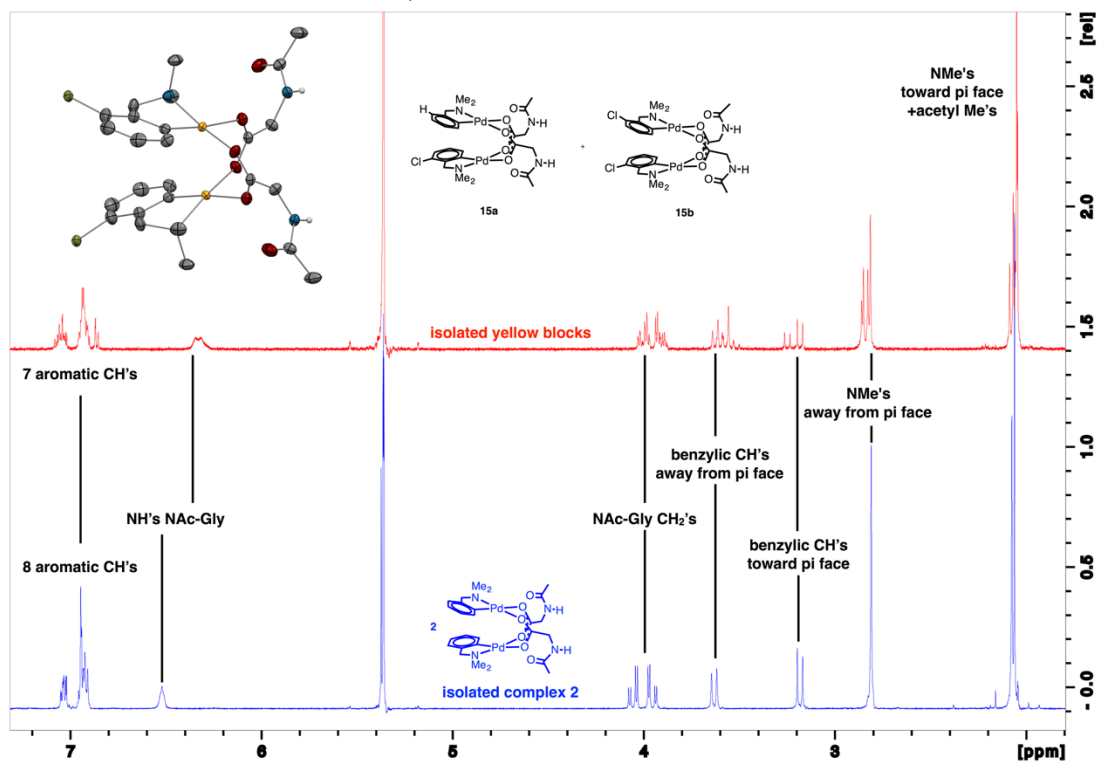

# <sup>1</sup>H NMR of isolated 15a and 15b

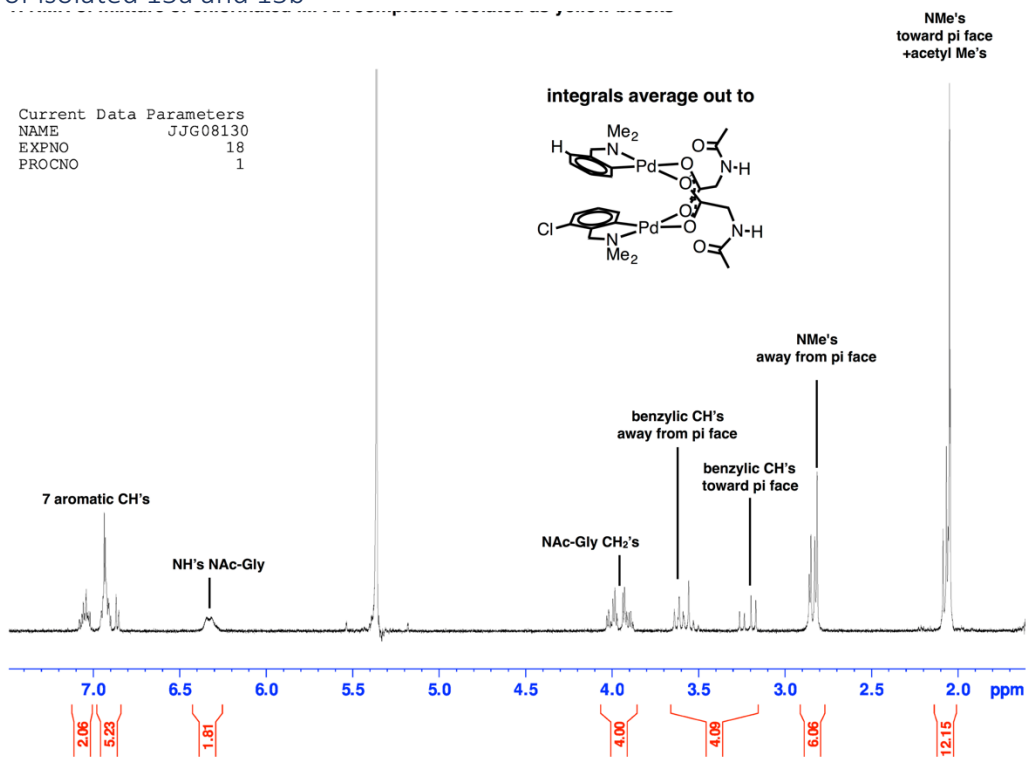

# Comparison of <sup>1</sup>H NMR of complex S1.1 with isolated mixture of 16a and 16b

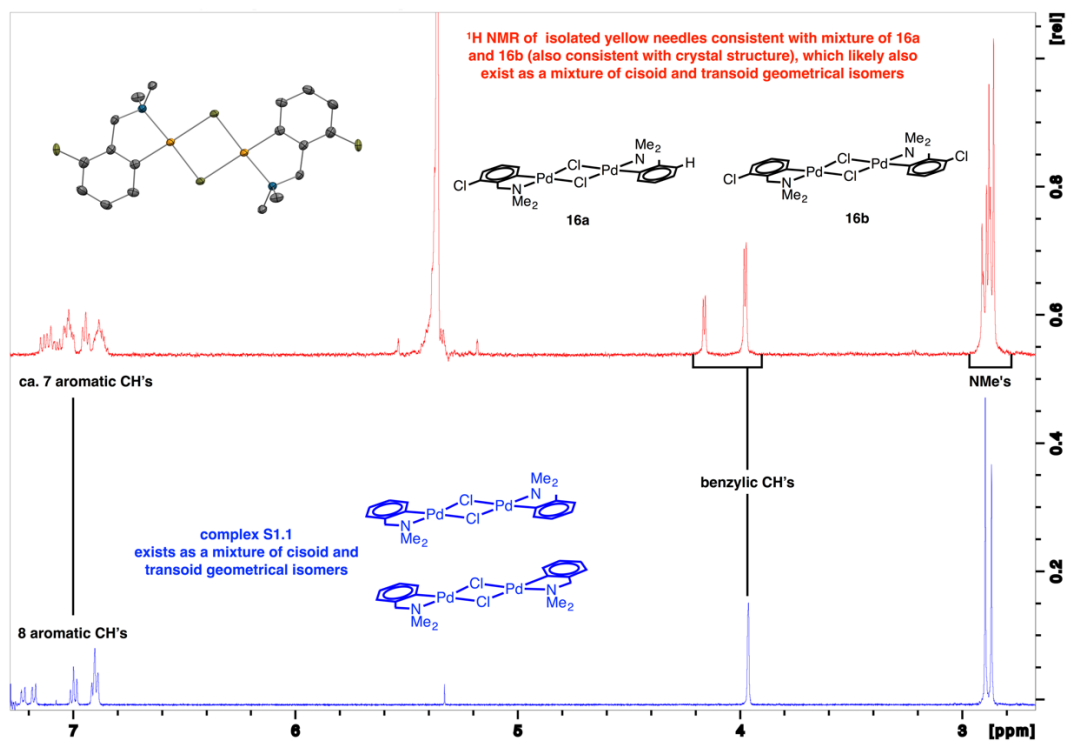

# <sup>1</sup>H NMR of 16a and 16b

JJG08130 19 1 "/Users/joe/Dropbox/Grad/NMR Backups"

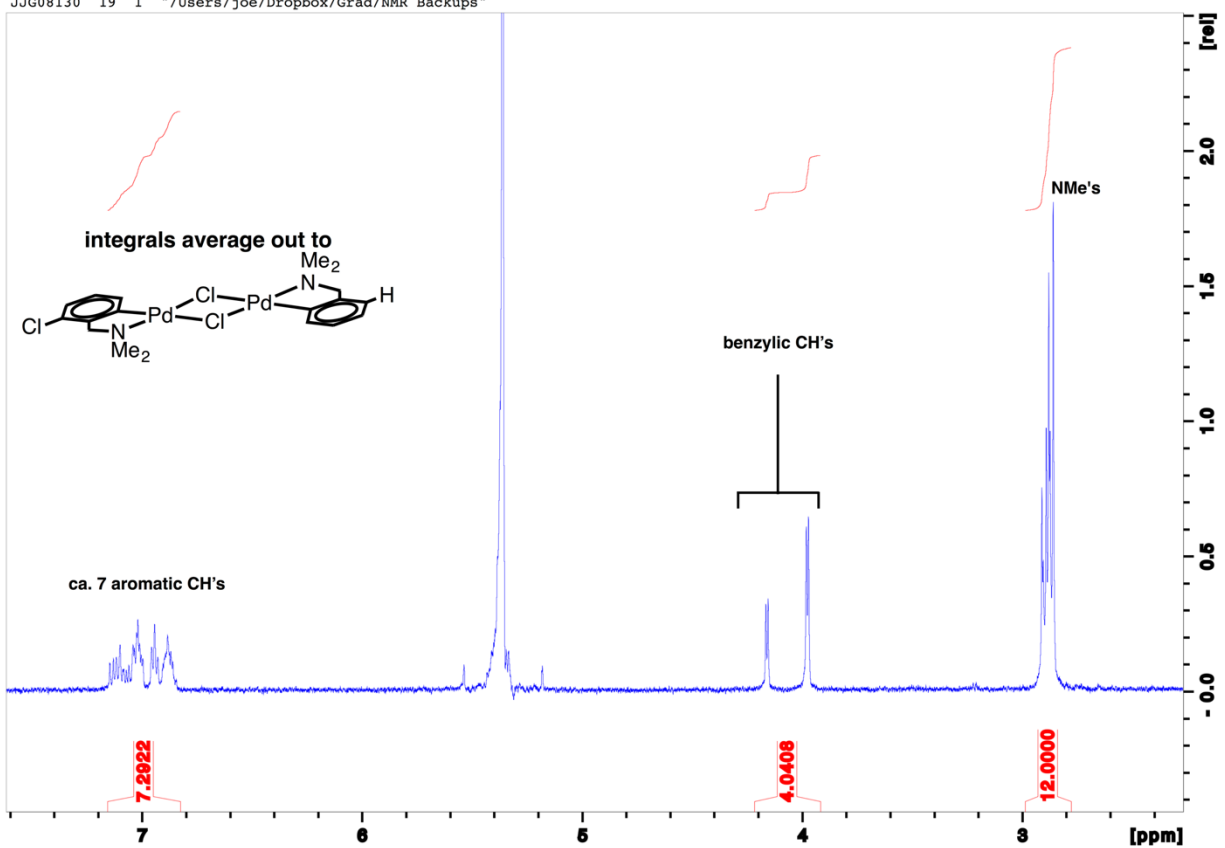

## Reaction with 2.4 equiv. iodobenzene dichloride

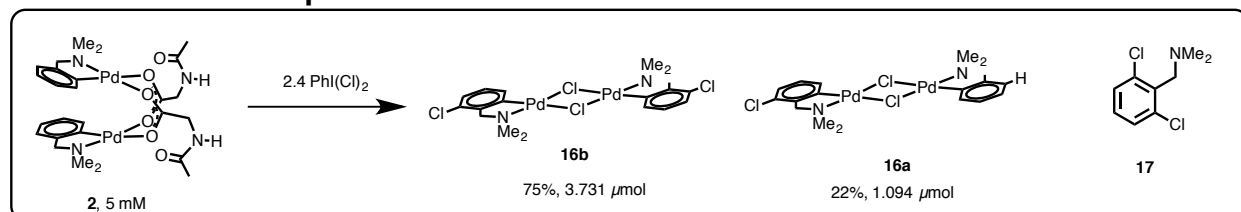

To an NMR tube was added a stock solution in  $\text{CD}_2\text{Cl}_2$  of **2** (10 mM, 500  $\mu\text{L}$ , 5  $\mu\text{mol}$ , 1 equiv.), a stock solution in  $\text{CD}_2\text{Cl}_2$  of **S1.3** (20 mM, 50  $\mu\text{L}$ , 1  $\mu\text{mol}$ , 0.20 equiv.), and a stock solution in  $\text{CD}_2\text{Cl}_2$  of iodobenzene dichloride (26.7 mM, 450  $\mu\text{L}$ , 12  $\mu\text{mol}$ , 2.4 equiv.). The reaction was monitored over 24 hours and the yields of each complex determined by integration of the benzylic resonances with respect to internal standard (see NMR below). The sample was filtered over a 1 cm pad of celite in a Pasteur pipette with an additional 2 mL  $\text{CH}_2\text{Cl}_2$  into a one dram vial to remove precipitated MPAA. The one dram vial was nested in a 20 mL scintillation vial with 2 mL pentane in the outer vial. Overnight, red needles suitable for x-ray diffraction grew and upon analysis by x-ray diffraction revealed the dichlorinated organic product **17** which co-crystallized as the HCl salt of tetrachloropalladate. The mother liquor was poured into a new one dram vial and was nested in a 20 mL scintillation vial with 10 mL pentane in the outer vial. Over two days at room temperature, yellow needles developed. The unit cell of the needles was determined by x-ray diffraction was identical to that of the crystallized mixture of **16a** + **16b** from the previous experiment. The yellow needles were washed with pentane and analyzed by  $^1\text{H}$  NMR which gave a spectrum consistent with **16b** contaminated with <10% **16a** (see NMR below).

### $^1\text{H}$ NMR of reaction progress

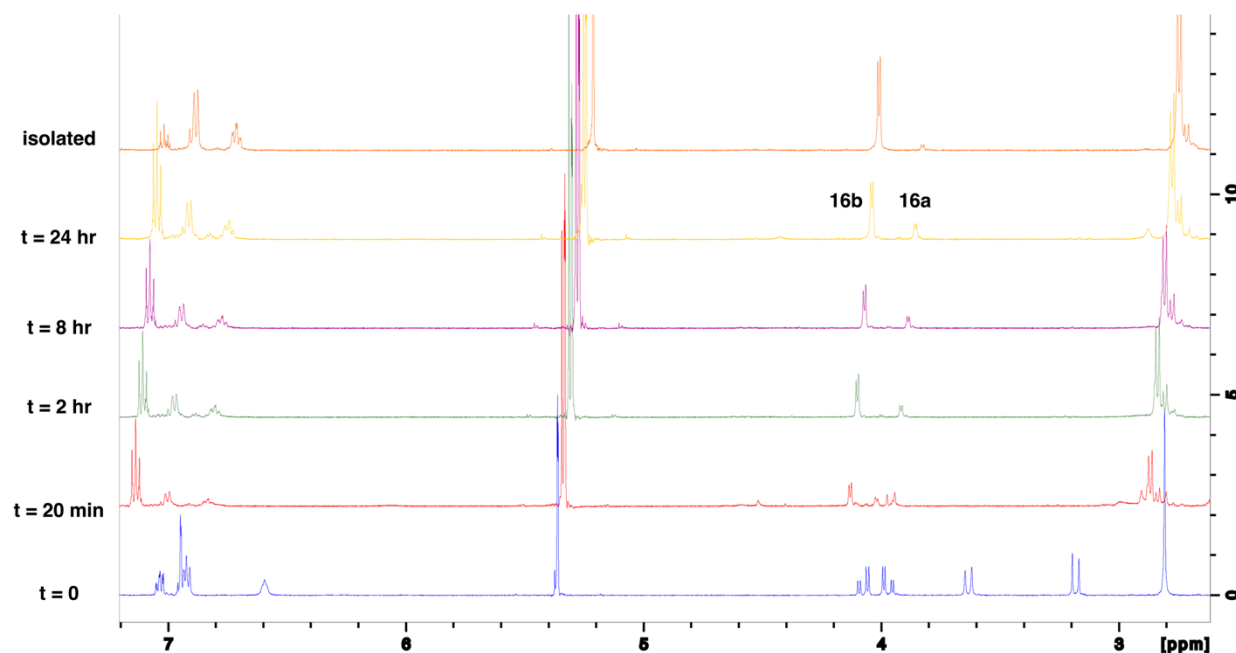



$^1\text{H}$  NMR integrals used to determine yield

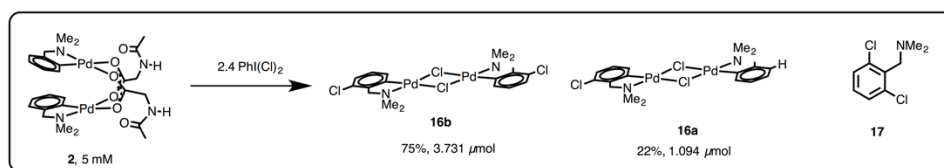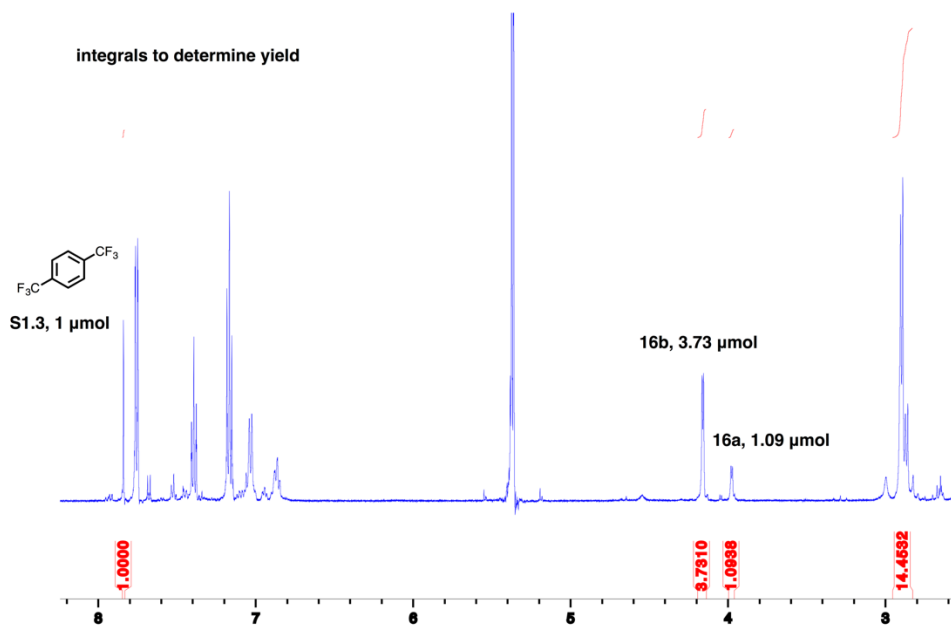

$^1\text{H}$  NMR of isolated 16b

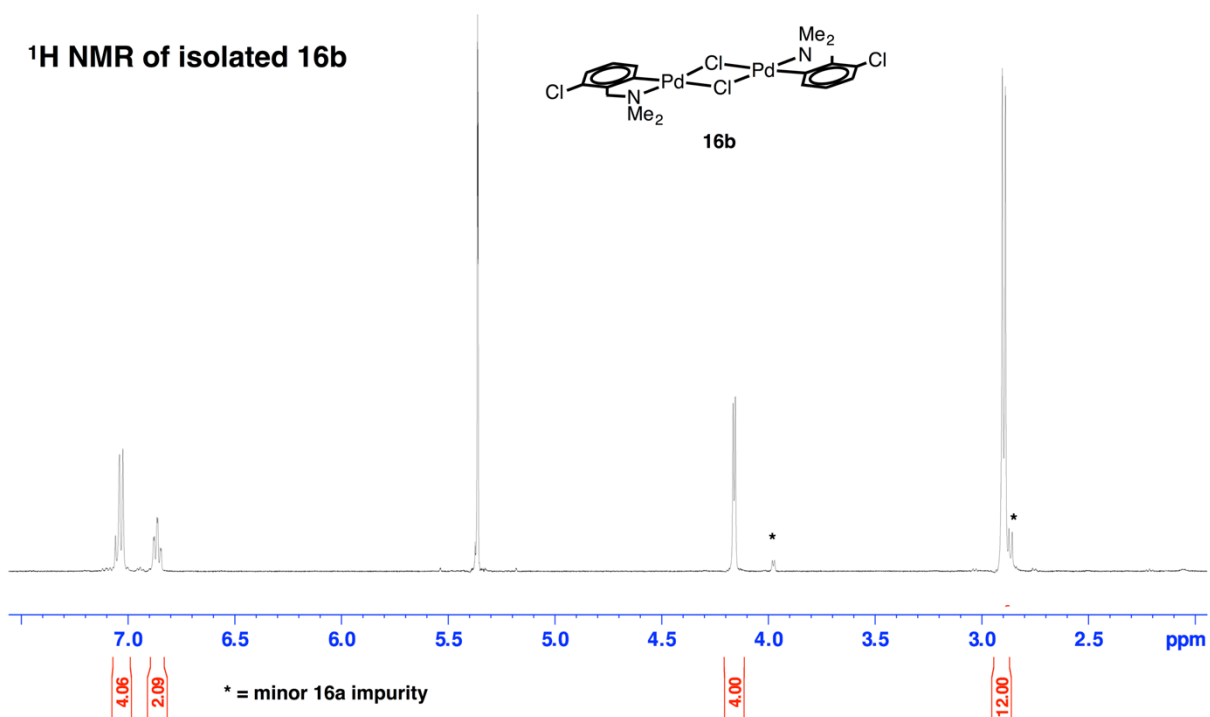

## Pd(II) catalyzed olefination of dmbs

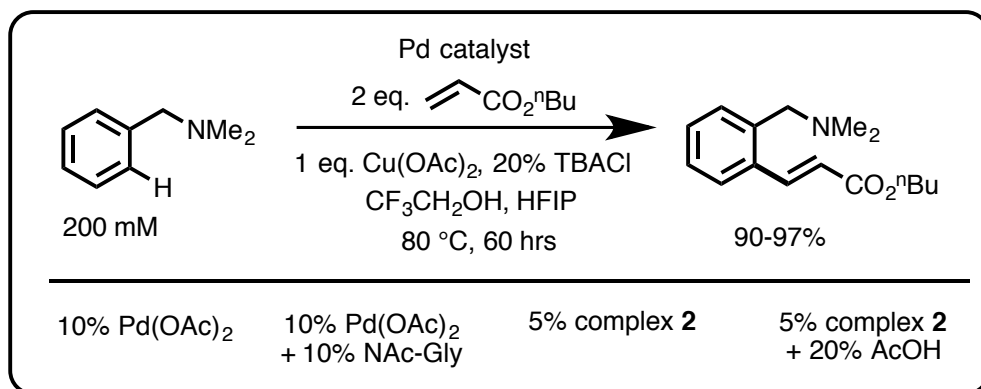

### experimental set up

Four reactions were set up in 2 dram vials in parallel under air. The appropriate catalyst was weighed into each vial as a solid (acetic acid by volume as neat liquid):

vial A: Pd(II) acetate (18.0 mg, 80  $\mu\text{mol}$ , 10 mol%)

vial B: Pd(II) acetate (18.0 mg, 80  $\mu\text{mol}$ , 10 mol%) + NAc-Gly (9.39 mg, 80  $\mu\text{mol}$ , 10 mol%)

vial C: complex 2 (28.5 mg, 40  $\mu\text{mol}$ , 5 mol%)

vial D: complex 2 (28.5 mg, 40  $\mu\text{mol}$ , 5 mol%) + acetic acid (9.61 mg, 9.16  $\mu\text{L}$ , 160  $\mu\text{mol}$ , 20%).

To each vial was added as a solid  $\text{Cu}(\text{OAc})_2$  (145 mg, 0.8 mmol, 1.0 equiv.) as a solid and a magnetic stir bar. To each vial was added 200  $\mu\text{L}$  trifluoroethanol, followed by a stock solution in trifluoroethanol (800  $\mu\text{L}$ ) of dmbs (1.0 M, 0.8 mmol, 108mg, 1 equiv.) and 1,4-bis(trifluoromethyl)-benzene (0.05 M, 0.04 mmol, 5%). To each vial was added a stock solution in trifluoroethanol of tetrabutylammonium chloride (1 mL, 160mM, 160  $\mu\text{mol}$ , 44.5mg, 20%). To each vial was added 2 mL of hexafluoro-isopropanol. Each vial was clamped into a preheated 80 °C oil bath and stirred for 5 minutes. Reactions were initiated by addition of neat n-butyl-acrylate (1.6 mmol, 205 mg, 229  $\mu\text{L}$ , 2 equiv.). Reaction progress was monitored by extracting 50  $\mu\text{L}$ , quenching with 200  $\mu\text{L}$  2M potassium carbonate in a 1.5 mL eppendorf tube, extracting with 800  $\mu\text{L}$   $\text{CDCl}_3$ , extracting starting material and products into the organic phase by shaking vigorously, filtering the organic phase over a 1 cm pad of  $\text{Na}_2\text{SO}_4$  directly into an NMR tube, and determining yield by integration of the most downfield product resonance (8.09 ppm) with respect to 1,4-bis(trifluoromethyl)-benzene.

Figures S1.3: bar graph of initial rates of olefination with different precatalysts

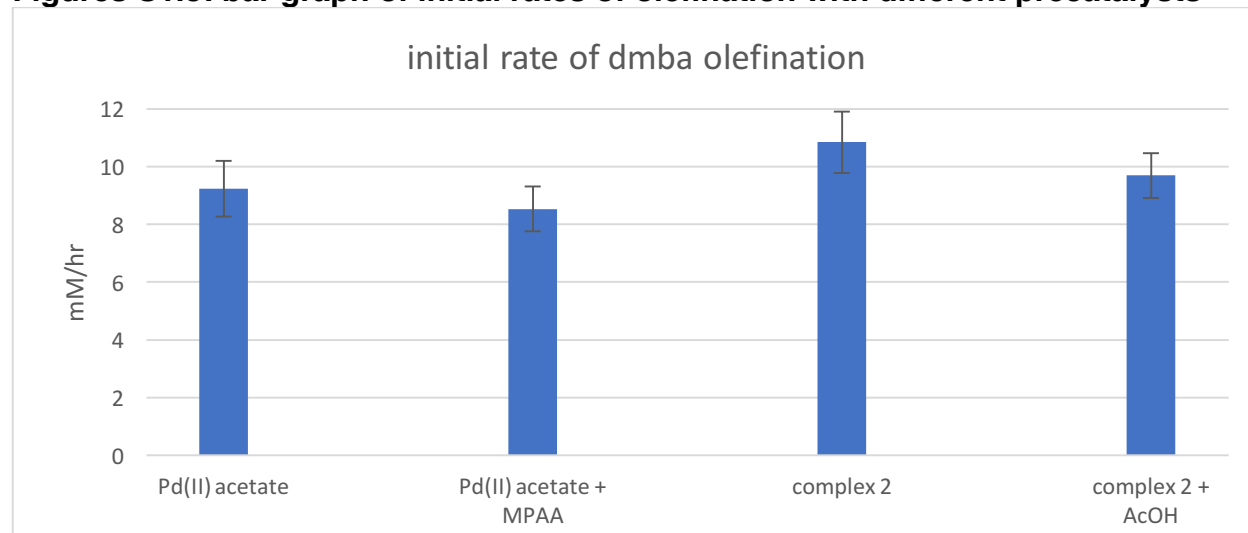

**Figure S1.4: reaction progress initial rates region**

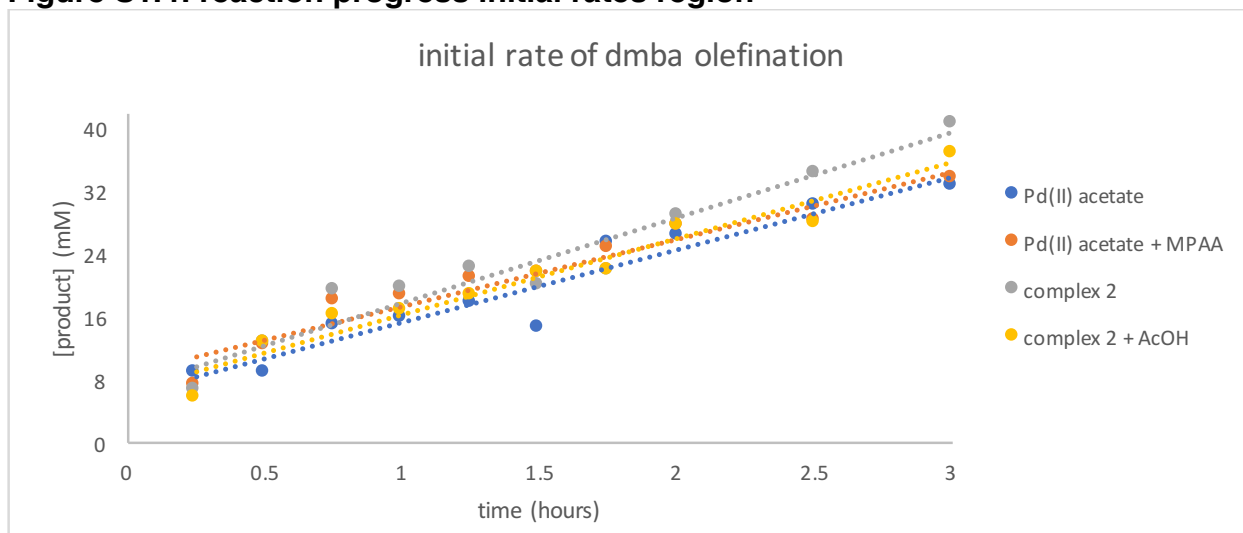

**Figure S1.5: full reaction profiles**

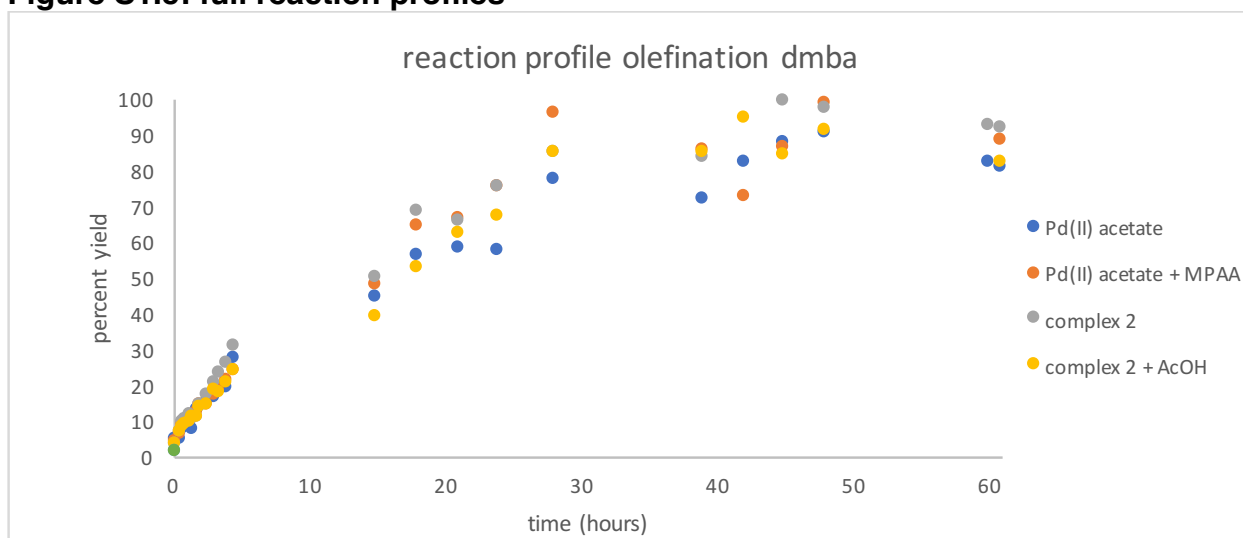

## Section S1.12: Palladium catalyzed olefination of *o*-CF<sub>3</sub>- phenyl acetic acid.

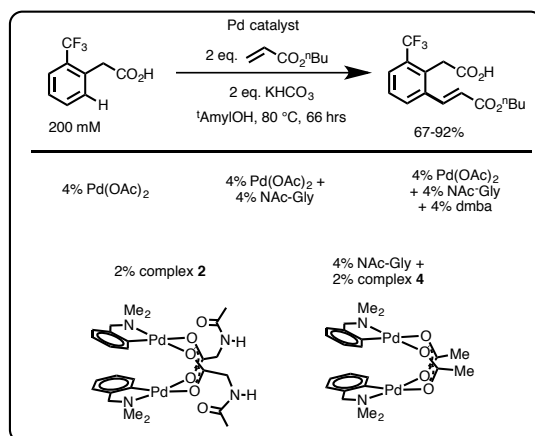

### experimental set up

Five reactions were set up in 6 dram vials in parallel under air. The appropriate catalyst was weighed into each vial as a solid (dmba as a neat liquid by volume).

**vial A:** Pd(II) acetate (7.18 mg, 32  $\mu$ mol, 4 mol%)

**vial B:** Pd(II) acetate (7.18 mg, 32  $\mu$ mol, 4 mol%) + NAc-Gly (3.75 mg, 32  $\mu$ mol, 4 mol%)

**vial C:** Pd(II) acetate (7.18 mg, 32  $\mu$ mol, 4 mol%) + NAc-Gly (3.75 mg, 32  $\mu$ mol, 4 mol%) + dmba (4.32 mg, 4.80  $\mu$ L, 32  $\mu$ mol, 4 mol%).

**vial D:** complex 2 (11.42 mg, 16  $\mu$ mol, 2 mol%)

**vial E:** complex 4 (9.59 mg, 16  $\mu$ mol, 2 mol%) + NAc-Gly (3.75 mg, 32  $\mu$ mol, 4 mol%)

To each vial was added as a solid KHCO<sub>3</sub> (160 mg, 1.6 mmol, 2.0 equiv.) as a solid and a magnetic stir bar. To each vial was added 4mL of a stock solution in tert-amyl-alcohol containing 2-trifluoromethyl-phenyl-acetic acid (200 mM, 0.8 mmol, 163 mg, 1 equiv.), 1,4-bis(trifluoromethyl)-benzene (20 mM, 0.08 mmol, 17.1 mg, 10%), and n-butyl-acrylate (400 mM, 1.6 mmol, 205 mg, 2.0 equiv.). The reactions were stirred at room temperature for 5 minutes before initiating by placing in an aluminum heating block pre-heated to 80 °C. Reaction progress was monitored by extracting 50  $\mu$ L, quenching with 200  $\mu$ L 2M aqueous HCl in a 1.5 mL eppendorf tube, adding 800  $\mu$ L CDCl<sub>3</sub>, extracting into the organic phase by shaking vigorously, filtering the organic phase over a 1 cm pad of Na<sub>2</sub>SO<sub>4</sub> directly into an NMR tube, and determining conversion by normalizing the integrals of the starting material and product -CF<sub>3</sub> resonances to 100%.

**Figure S1.6: reaction progress of aryl acetic acid olefination with different precatalysts**

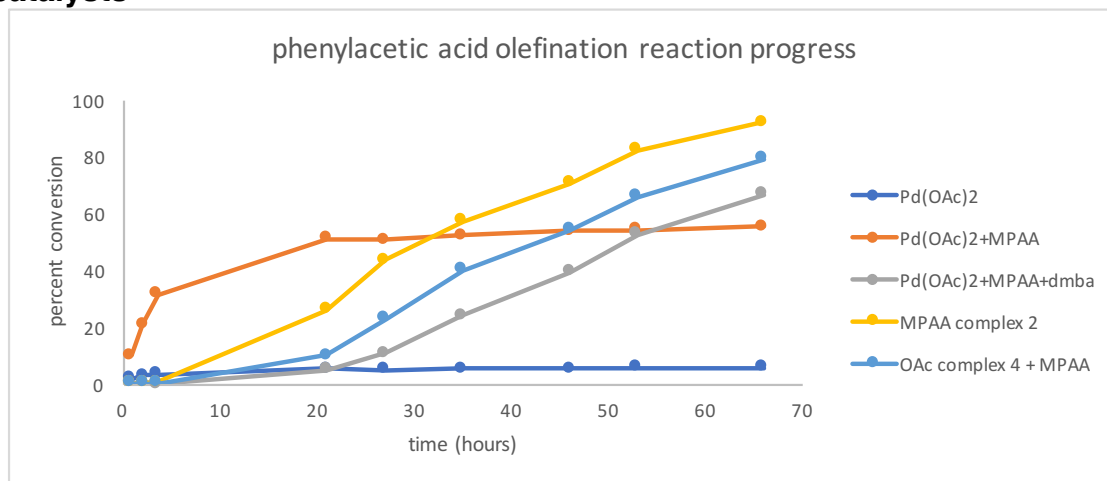

## Section S1.13: Subsequent reaction of 5d in the presence of excess iodine

### Preliminary observation

While conducting kinetics on the stoichiometric iodination of **6b** we noticed that with extended reaction times, the iodinated product **5d** was consumed and a new product developed which we later characterized as formamidinium **S1.4**.

Stacked  $^{19}\text{F}$  NMR of preliminary observation

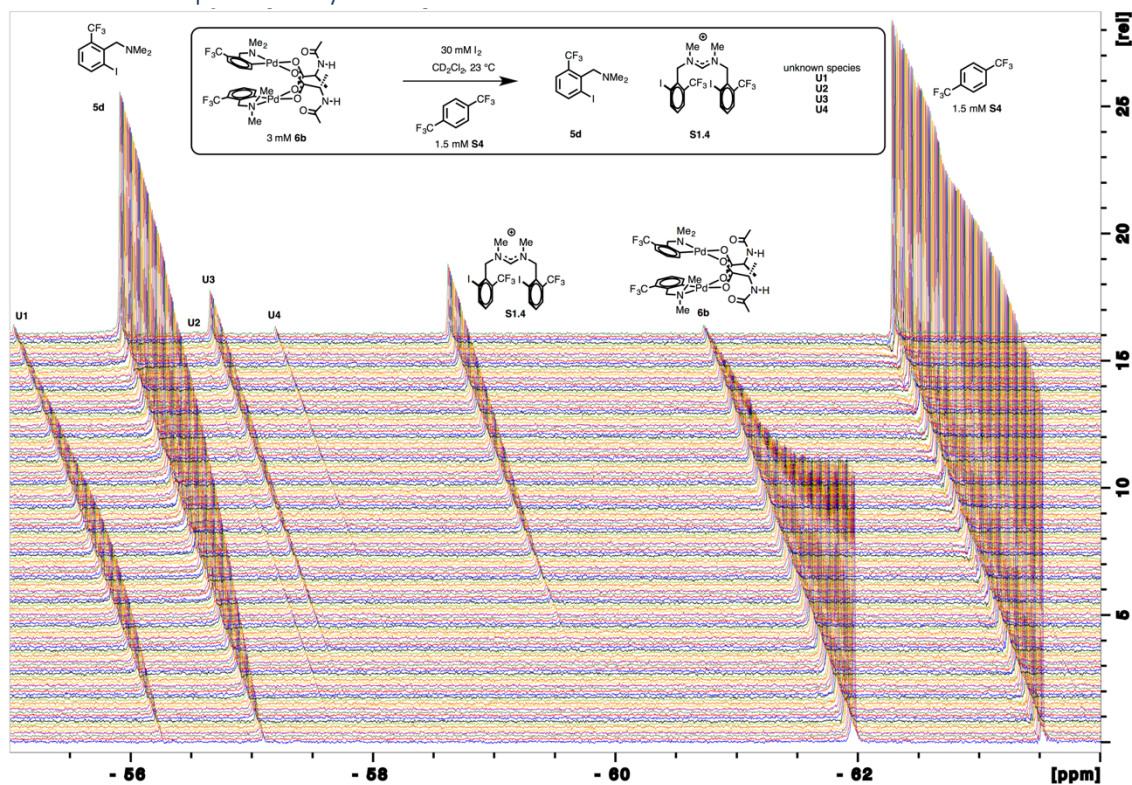

Integrated reaction profile of preliminary observation

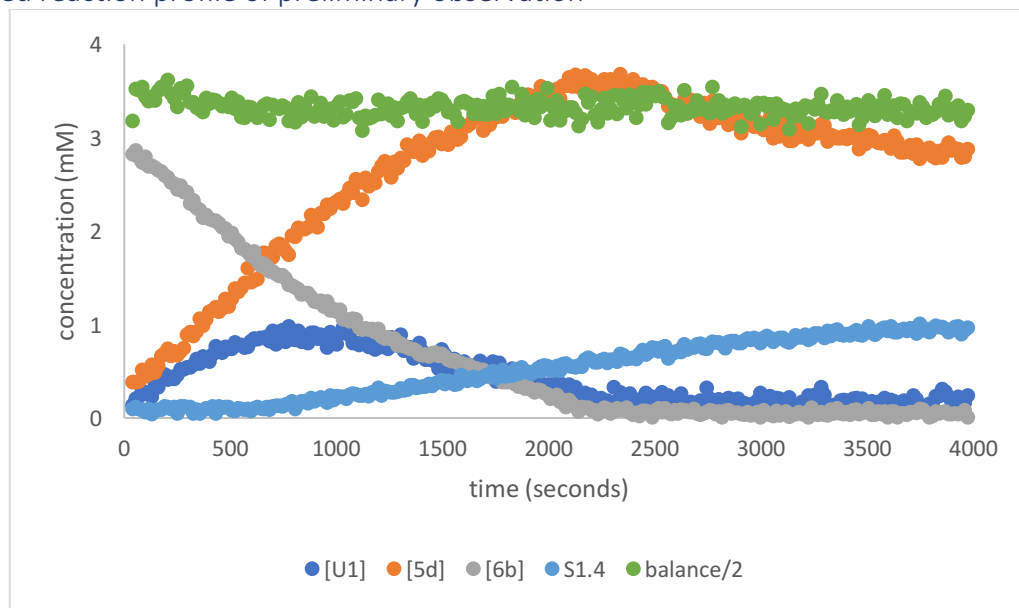

## Experimental set up

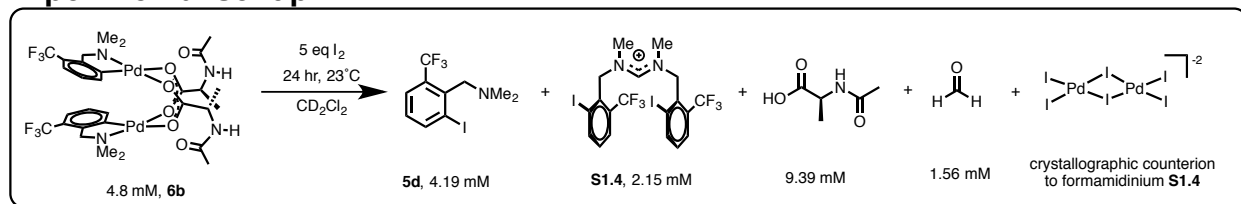

The following was performed in duplicate with one tube for spiking authentic product and the other for characterizing the reaction mixture and crystallization. To an NMR tube equipped with a J. Young cap was added a stock solution in CD<sub>2</sub>Cl<sub>2</sub> of 1,4-bis(trifluoromethyl)benzene (**S1.3**) (20 mM, 50  $\mu$ L, 1  $\mu$ mol), a stock solution in CD<sub>2</sub>Cl<sub>2</sub> of **6b** (9.6 mM, 500  $\mu$ L, 4.8  $\mu$ mol), and a stock solution in CD<sub>2</sub>Cl<sub>2</sub> of iodine (53.3 mM, 450  $\mu$ L, 24  $\mu$ mol). After the iodine solution was added the sample was sealed with a J. Young cap and immediately brought to the NMR spectrometer to be monitored. The reaction was monitored periodically over 24 h (see stacked spectra below) at which time the concentrations of the species present were determined by <sup>1</sup>H NMR with respect to 1,4-bis(trifluoromethyl)benzene (**S1.3**) internal standard (see integrated spectrum of reaction mixture below). To one of the tubes was added independently synthesized **5d** (see spectra before and after spiking authentic below). The tube which did not contain spiked **5d** was connected to a U-joint and the volatiles were vacuum transferred to a third J. Young tube which was characterized by <sup>1</sup>H, <sup>13</sup>C, HMQC, and <sup>19</sup>F NMR, which revealed the presence of only formaldehyde and internal standard 1,4-bis(trifluoromethyl)benzene (**S1.3**). (Formaldehyde is the only observed product that can account for the methyl-group which must be removed from **5d** to afford formamidine **S1.4**.) The non-volatile materials were re-dissolved by addition of 500  $\mu$ L of CD<sub>2</sub>Cl<sub>2</sub>. The reconstituted reaction mixture was characterized by <sup>1</sup>H NMR, COSY, and <sup>19</sup>F NMR which are fully consistent with a mixture of ca. 4:2:1 NAc-Ala:**5d**:**S1.4** (see spectra below). The heterogenous mixture was filtered over a 1 cm pad of celite in a Pasteur pipette with an additional 1 mL of CH<sub>2</sub>Cl<sub>2</sub> into a 1 dram vial, which was nested in a 20 mL scintillation vial. To the outer vial was added 2 mL of diethyl ether. After 24 hours at room temperature, small red-purple single crystals suitable for x-ray diffraction had grown. Analysis by x-ray diffraction revealed a ternary co-crystal with an asymmetric unit containing two equivalents of **S1.4**, two equivalents of iodine, and one equivalent of iodide bridged iodo palladate dimer (Pd<sub>2</sub>I<sub>6</sub><sup>2-</sup>). Notably, the contracted C-N bonds and the CNC angle of the fomamdidinium are consistent with an sp<sup>2</sup> hybridized carbon with C-N bonds of bond order >1 (see partial structure with labeled distances and angles below). Attempts to characterize pure **S1.4**, by NMR from isolated single crystals was not possible because the single crystals did not re-dissolve in CD<sub>2</sub>Cl<sub>2</sub> or CDCl<sub>3</sub> after extensive sonication. Thus **S1.4** was characterized as a mixture of **S1.4**, **5d**, and NAc-Ala. A mixture enriched in **S1.4** was obtained by transferring the mother liquor from which single crystals of **S1.4** were grown to a new one dram vial nested in a 20 mL scintillation vial. To the outer vial was added 2 mL of pentane. After 24 hours at room temperature a dark precipitate had developed. The supernatant was removed and the precipitate was washed with pentane. Analysis of the precipitate by <sup>1</sup>H NMR revealed a mixture nearly free of NAc-Ala and enriched in **S1.4**. Analysis of the supernatant by <sup>1</sup>H NMR revealed a mixture of NAc-Ala, **5d**, and minor, uncharacterized impurities. The entire procedure was scaled up ten fold to obtain more material to characterize the formyl C-H by <sup>13</sup>C NMR, HMQC, and COSY (see spectra below). All of the NMR data are consistent with the assigned structure **S1.4** as observed in the solid state.

## reaction progress by <sup>1</sup>H NMR

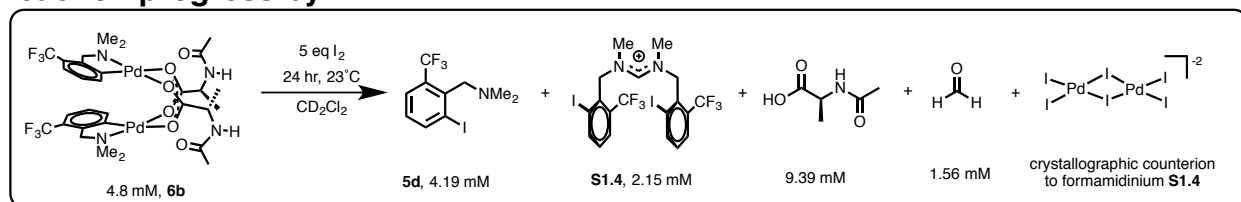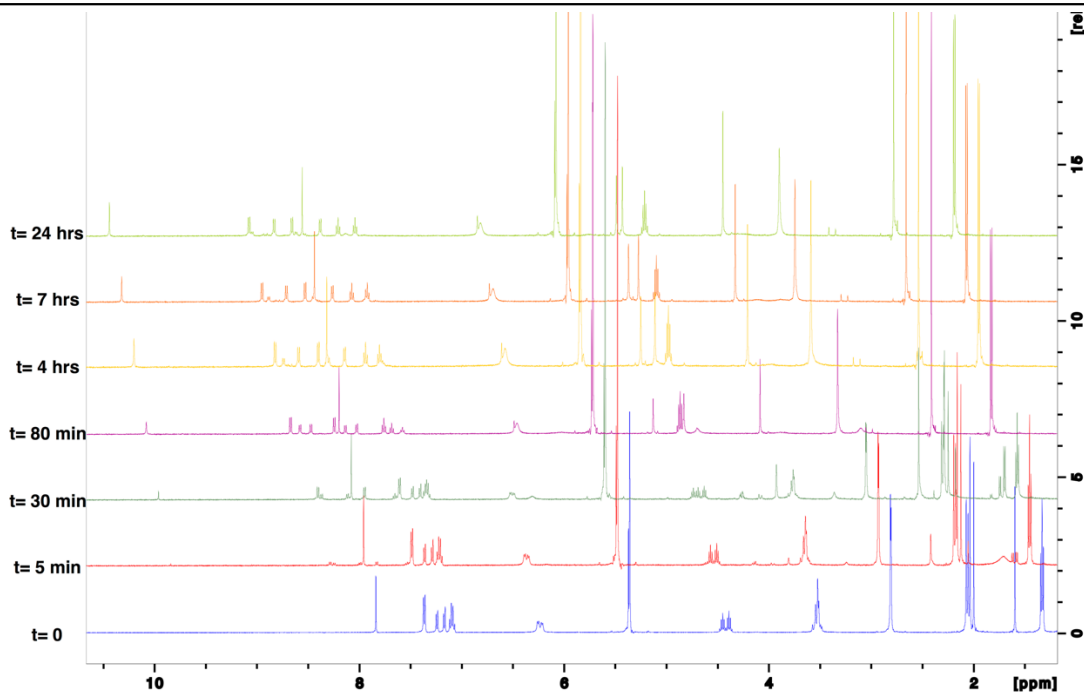

## Spectra before and after spiking independently synthesized 5d

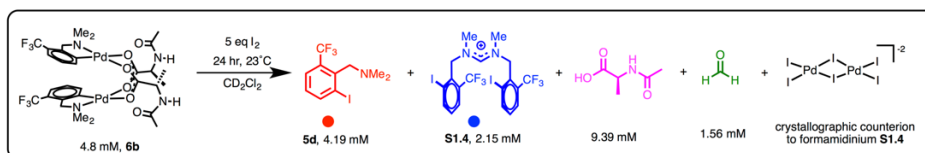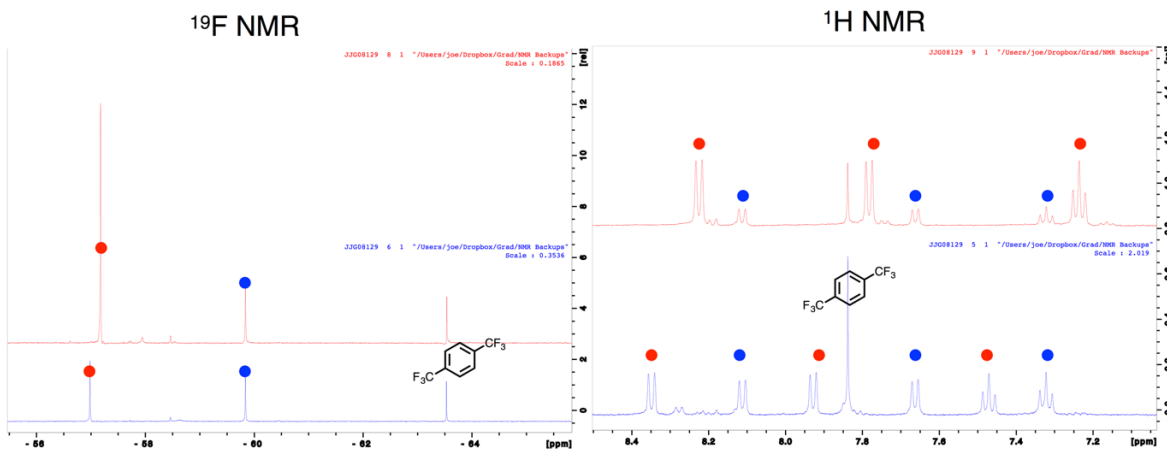

# Stacked: mixture before vacuum transfer, non-volatiles, volatiles

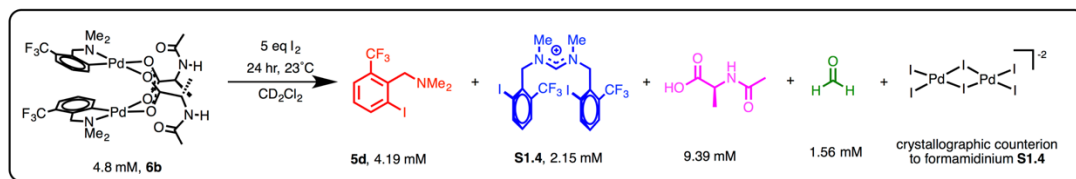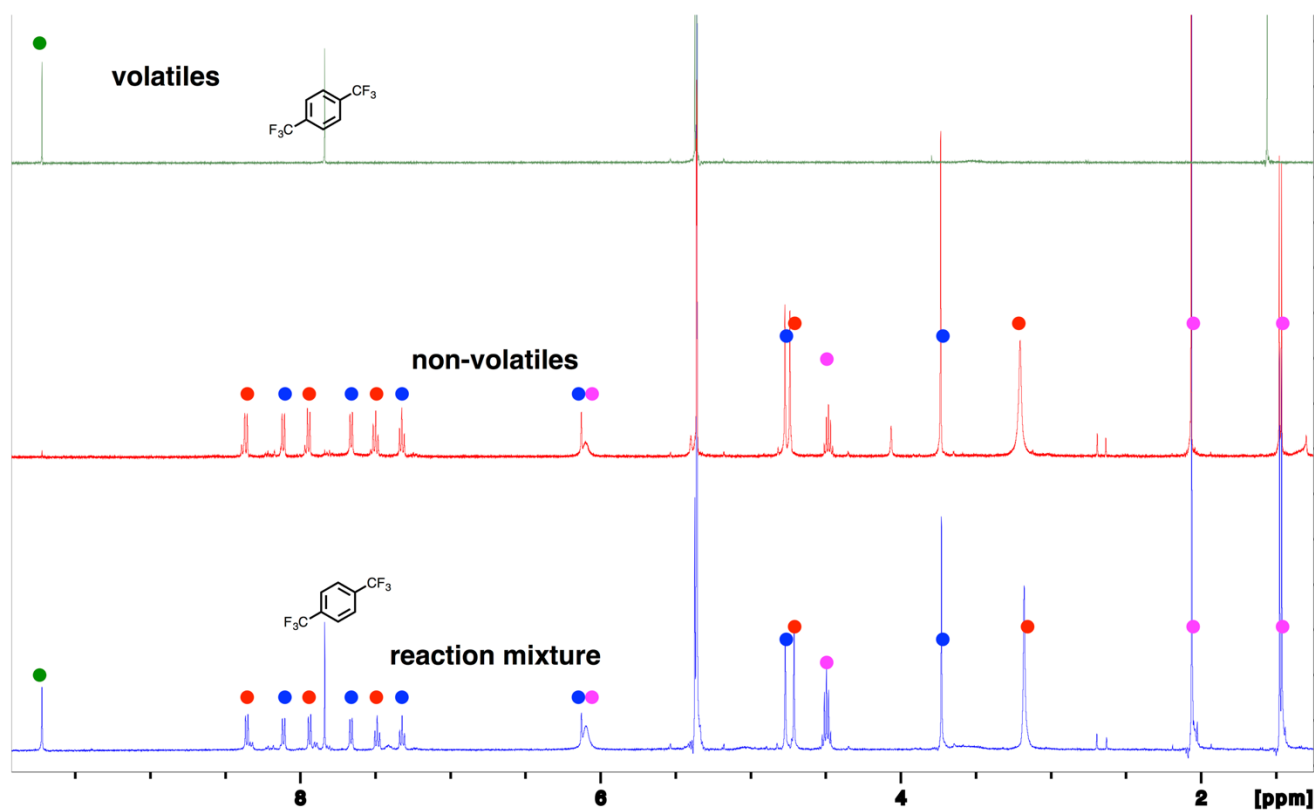



## Integrated reaction mixture used to determine yield

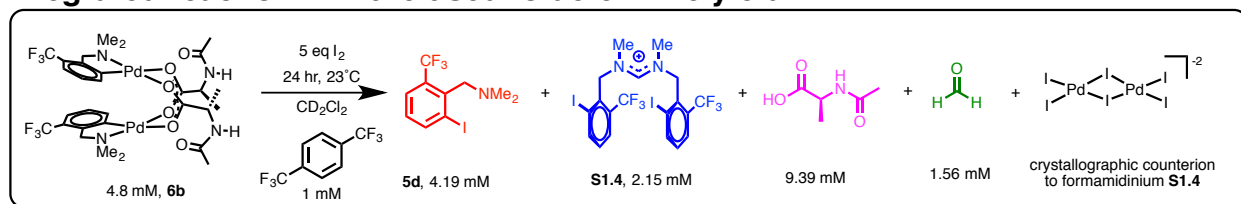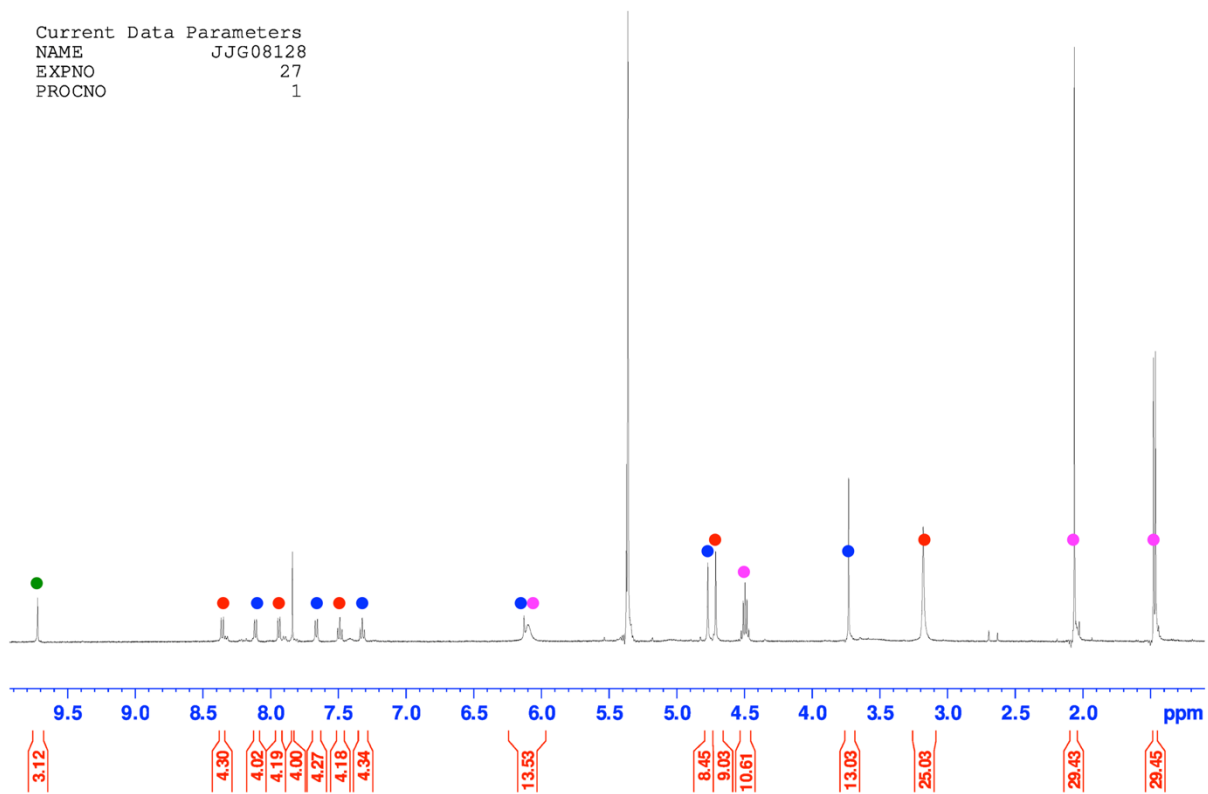

## HMQC volatiles

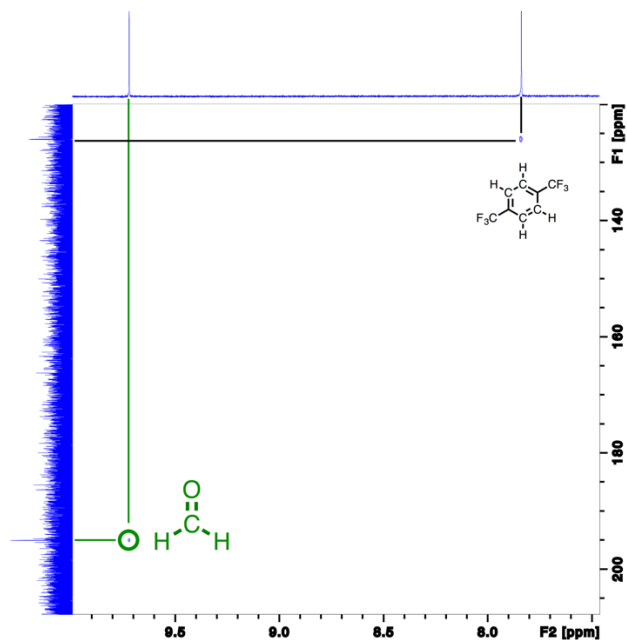

## COSY reaction mixture non-volatiles

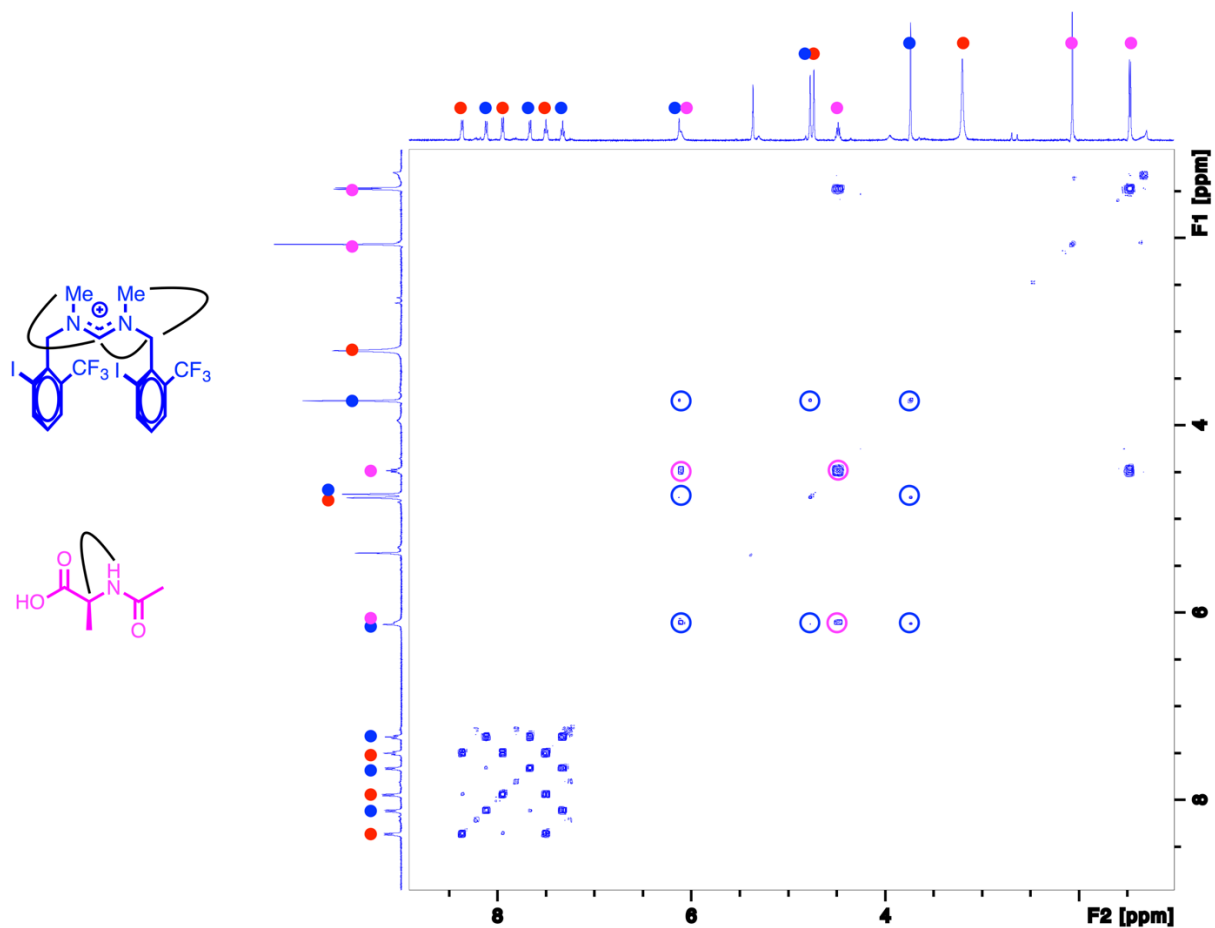

# 1H NMR enriched mixture integrals consistent with formamidinium

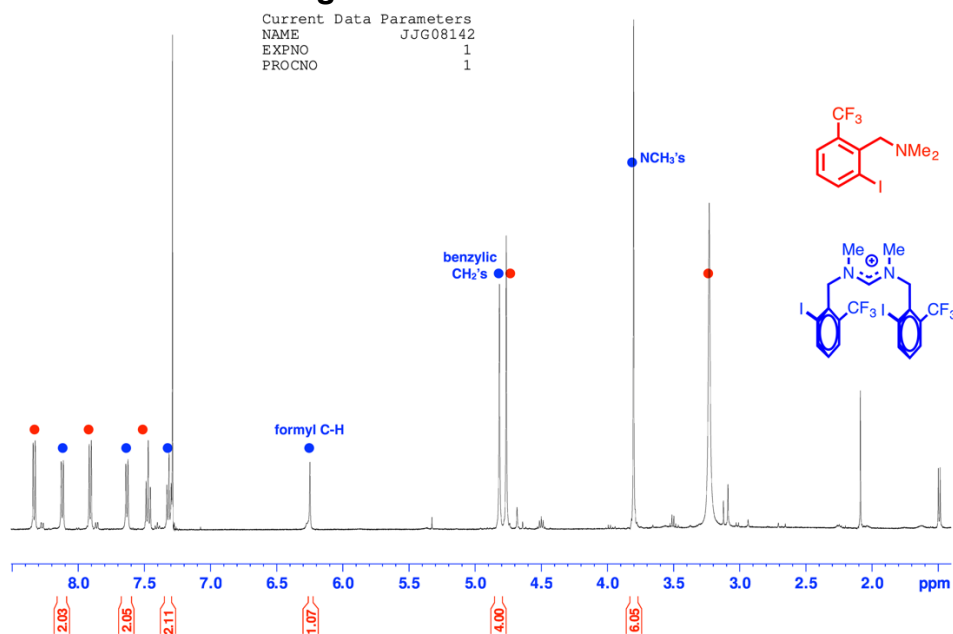

# COSY enriched mixture

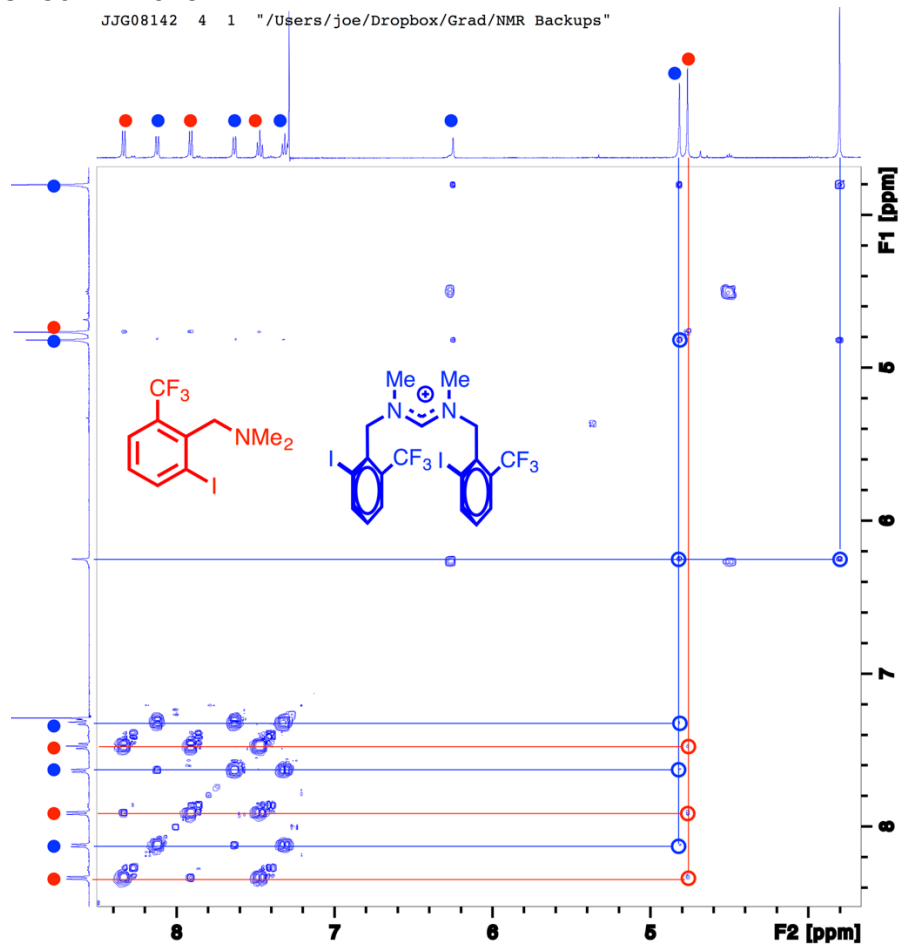

# HMQC enriched mixture

JJG08142 6 1 "/Users/joe/Dropbox/Grad/NMR Backups"

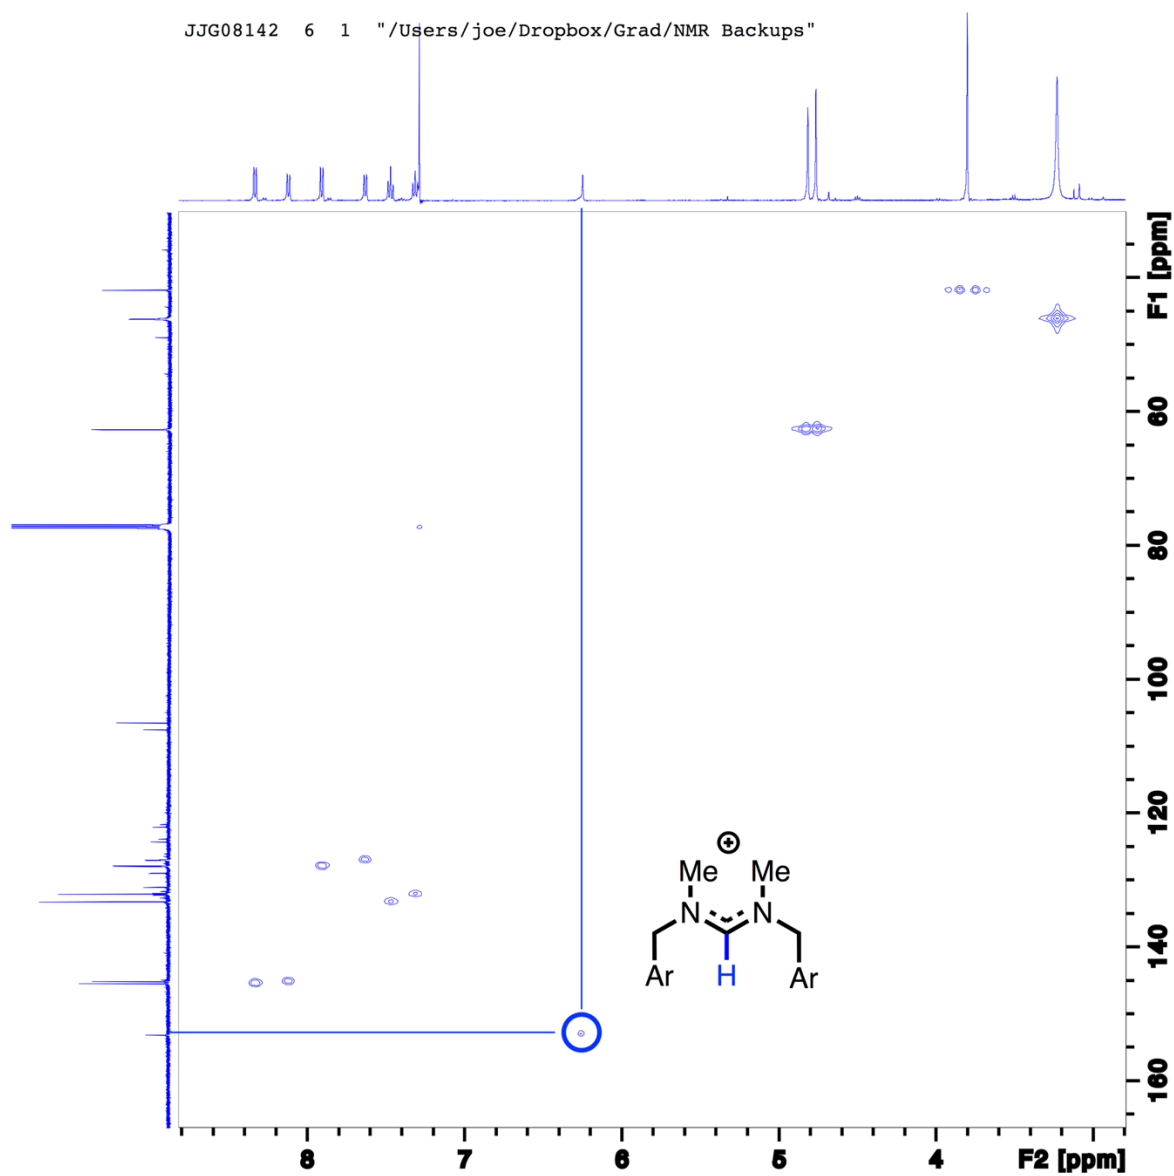

## Section S1.14 Iodination Kinetics

### Saturation in exogenous iodide (30 mM I<sub>2</sub>)

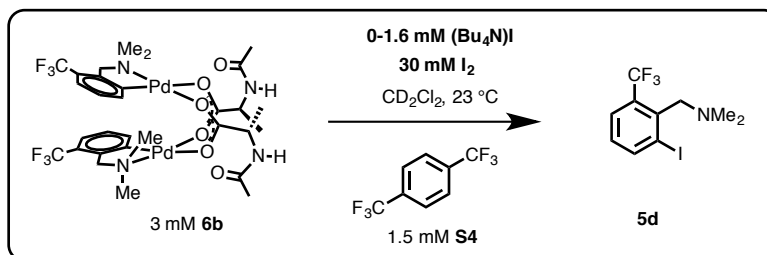

plots of reaction progress in initial rates region

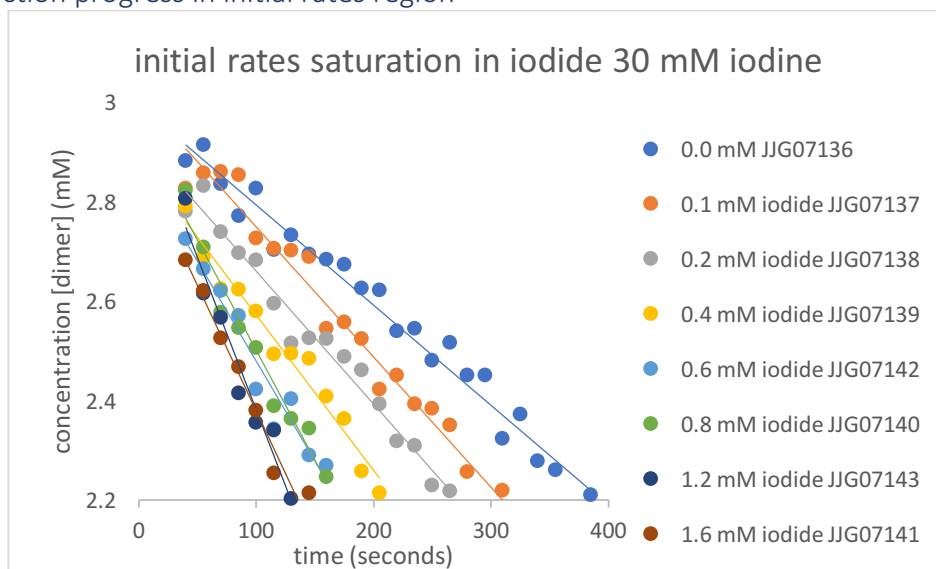

plot of initial rates vs [Bu<sub>4</sub>NI]

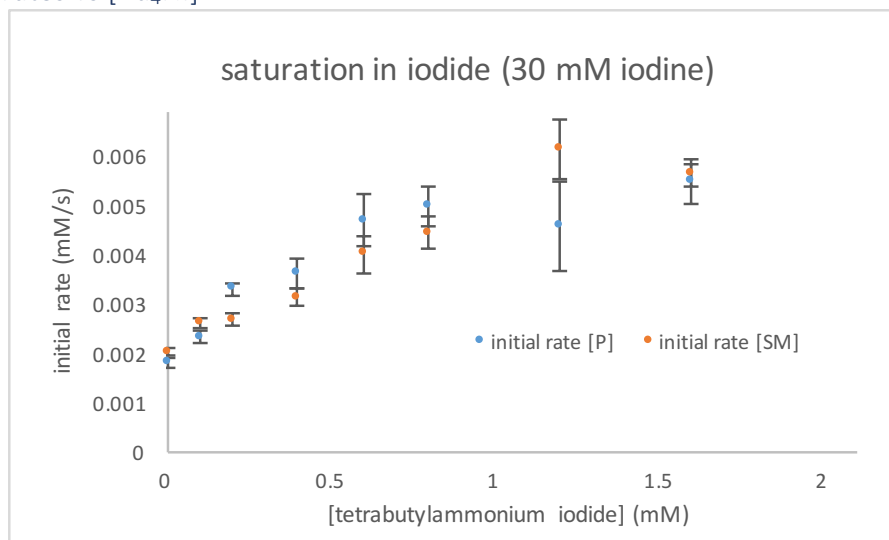

## Saturation in exogenous iodide (8 mM I<sub>2</sub>)

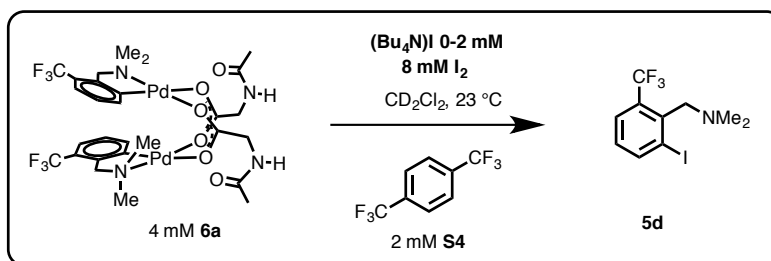

plots of reaction progress in initial rates region

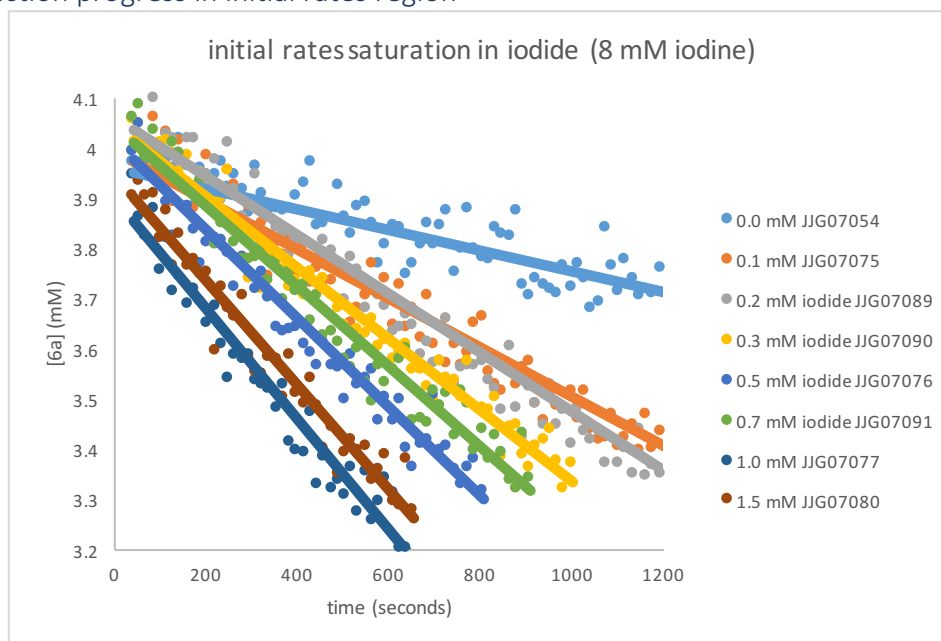

plot of initial rates vs  $[\text{Bu}_4\text{NI}]$

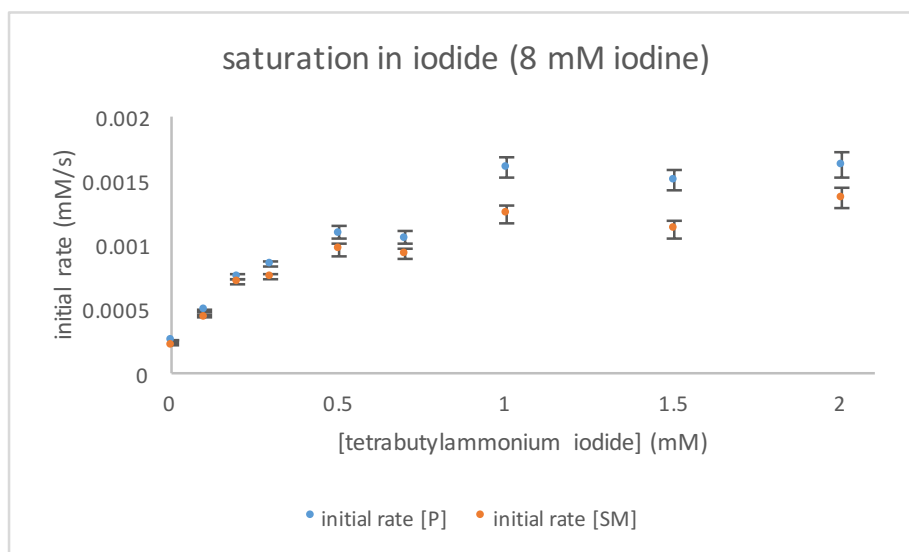

## Order in $I_2$ in the absence of exogenous $I^-$

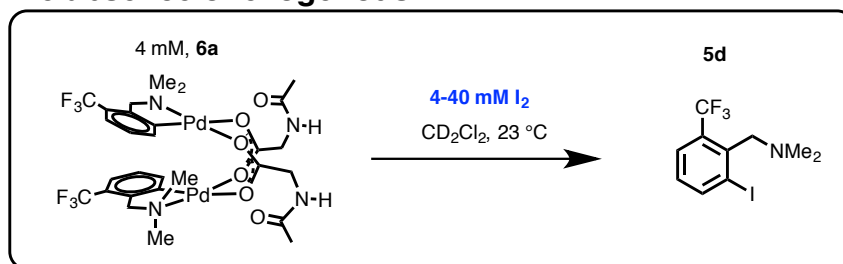

plots of reaction progress

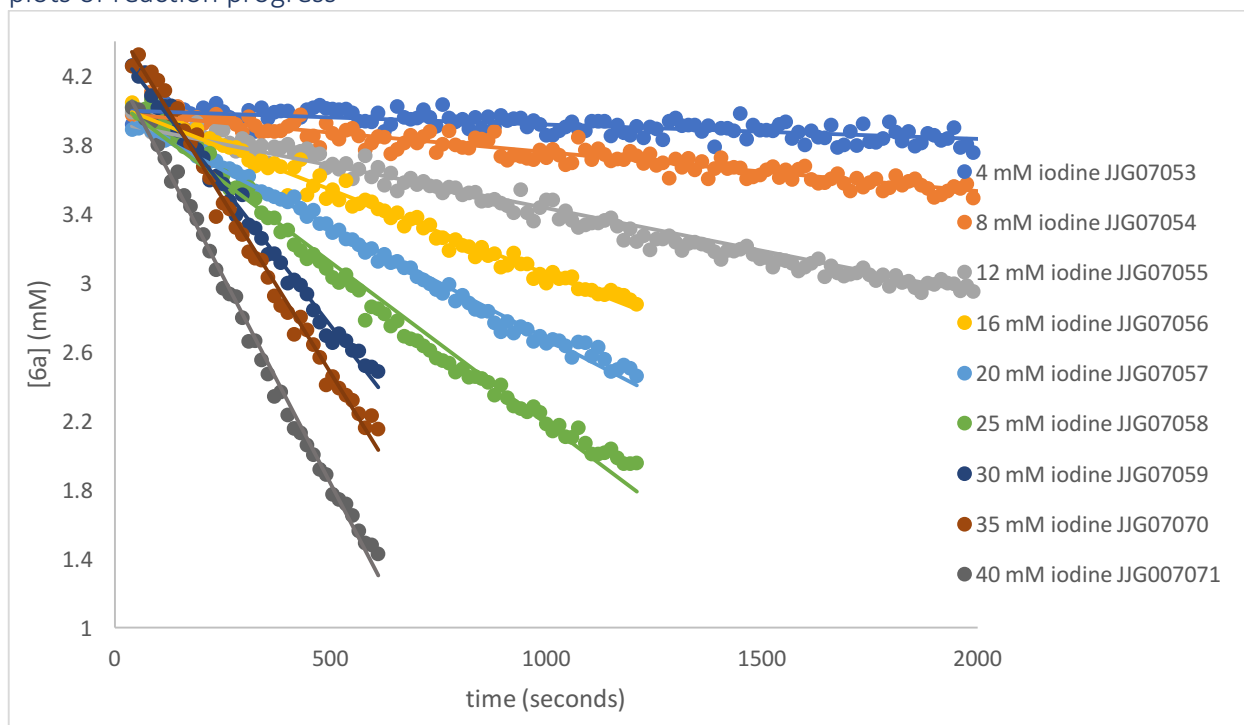

plot of initial rate versus initial  $[I_2]$

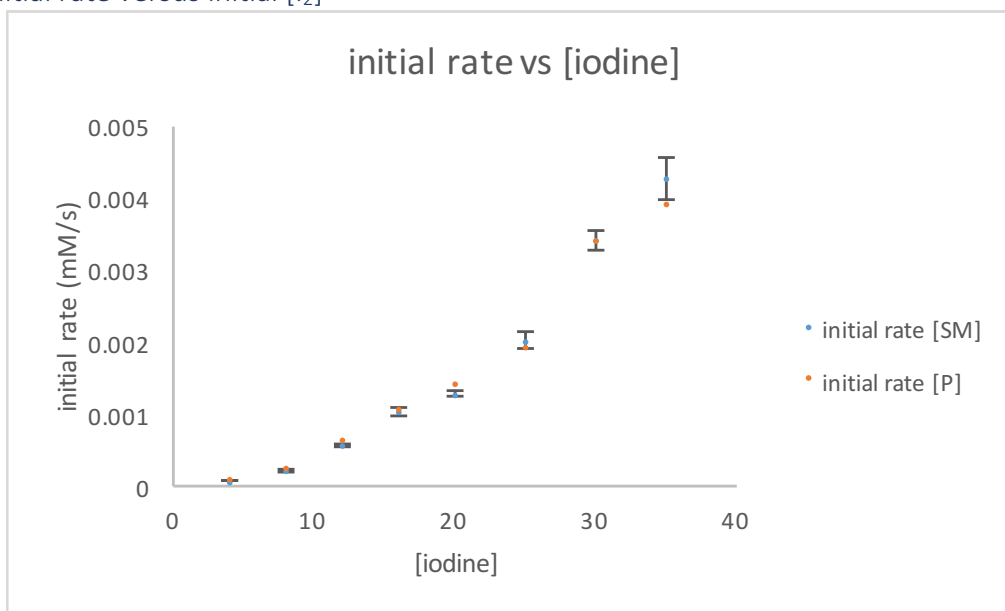

A reviewer noted that in the absence of exogenous iodide, the upward curvature in the plot of initial rate vs initial  $[I_2]$  could be a consequence of  $I_2$  acting as weakly binding/activating ligand. In this scenario, we would expect to see second order in  $I_2$  because one equivalent of  $I_2$  is required for functionalization and one for activation (relative to the resting state). On the other hand, the saturation behavior observed with iodide may be a consequence of iodide acting as a more strongly binding and activating ligand. In other words, iodide and iodine may play a similar role, but because of the differential ability of iodine and iodide to bind and activate, these effects are saturated in different concentration regimes.



## Order in I<sub>2</sub> in the presence of exogenous I<sup>-</sup>

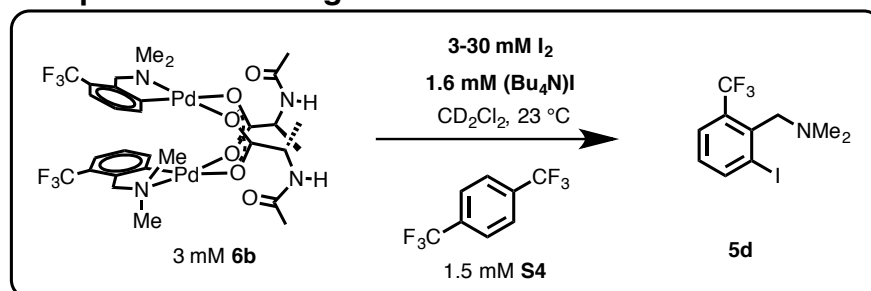

plots of reaction progress

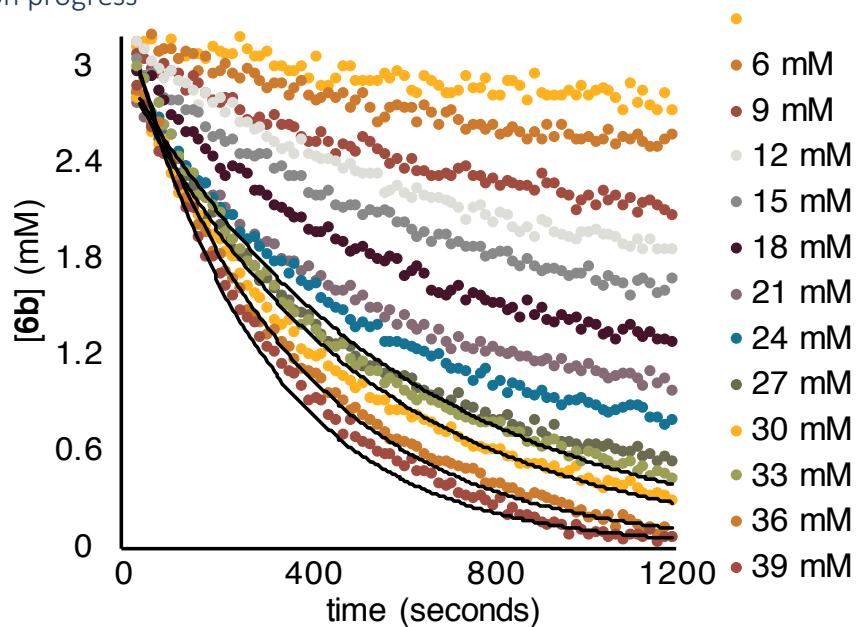

plot of initial rate versus initial [I<sub>2</sub>]

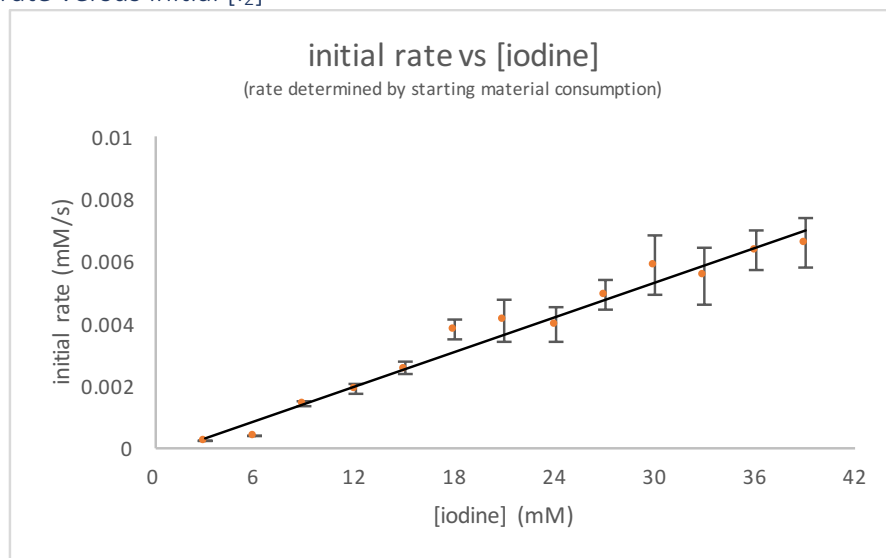

## Attempt to determine order in palladium by initial rates

Because of the small changes in concentration of [6b] when using large initial [6b], initial rates determined by consumption of [6b] were too variable. Instead, we determined initial rates by the rate of product formation. However, because we know that product is eventually consumed over the course of the reaction to form formamidinium **S1.4**, it is unclear how much confidence can be placed in initial rates of product formation.

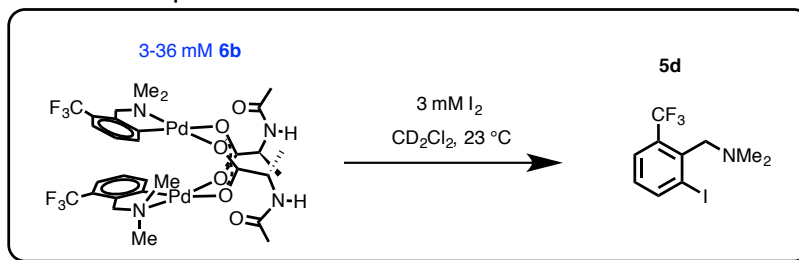

plot of initial rates versus initial [6b]

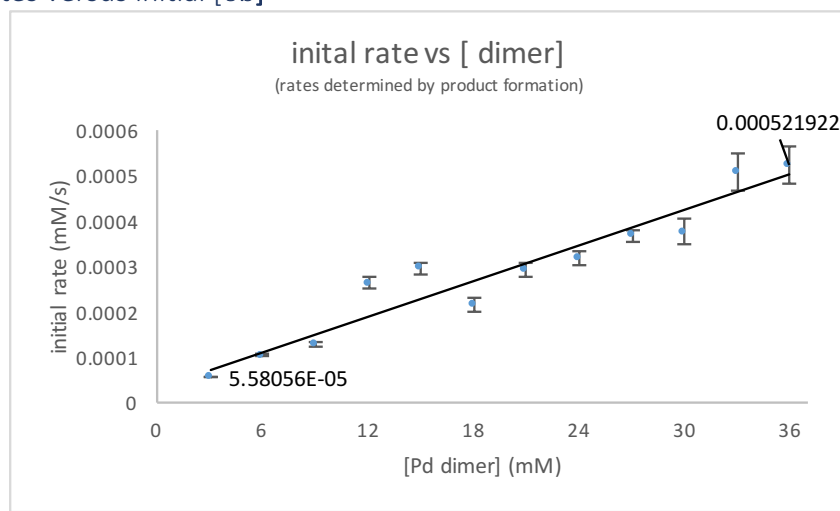

selected reaction profiles presented for clarity

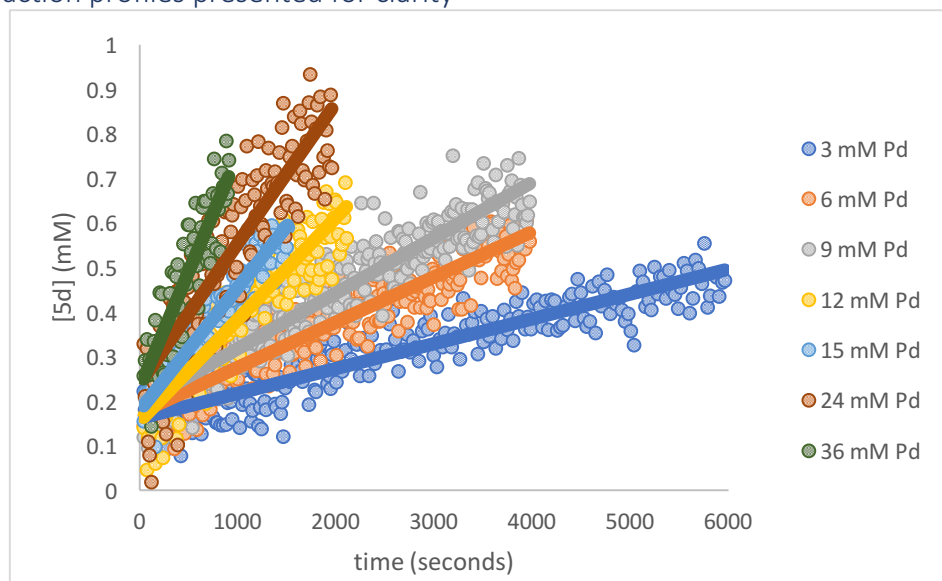

## General Crystallographic Methods

The diffraction data for all structures except complex\_**15** were measured at 100 K on a Bruker D8 VENTURE diffractometer equipped with a micro focus Mo-target X-ray tube ( $\lambda = 0.71073 \text{ \AA}$ ) and PHOTON 100 CMOS detector. Data were collected using  $\varphi$  and  $\omega$  scans to survey a hemisphere of reciprocal space. The diffraction data for complex\_**15** were measured at 100 K on a Bruker D8 fixed-chi with APEXII detector (synchrotron radiation at  $\lambda = 0.41328 \text{ \AA}$ ) located at the Advanced Photon Source, Argonne Nat'l Lab (ChemMatCARS Sector 15).<sup>1</sup> Data were collected using  $\varphi$  scans in this case. Data reduction and integration were performed with the Bruker APEX3 software package.<sup>2</sup> Data were scaled and corrected for absorption effects using the multi-scan procedure as implemented in SADABS.<sup>3</sup> The structure were refined by a full-matrix least-squares procedure using OLEX2, version 1.2.8<sup>4</sup> with implemented XL refinement program version 2016/6.<sup>5</sup> Crystallographic data and further details of the data collection and structure refinement are listed in the corresponding tables below.

All of the structures below are shown with Pd= yellow, C= grey, O= red, N= blue, F= green, Cl= green, I= purple

1. ChemMatCARS Sector 15 is principally supported by the Divisions of Chemistry (CHE) and Materials Research (DMR), National Science Foundation, under grant number NSF/CHE-1346572. Use of the Advanced Photon Source, an Office of Science User Facility operated for the U.S. Department of Energy (DOE) Office of Science by Argonne National Laboratory, was supported by the U.S. DOE under Contract No. DE-AC02-06CH11357.
2. Bruker AXS, version 2015.5-2, 2015
3. SADABS, version 2014/5, 2015, part of Bruker APEX3 software package
4. O. V. Dolomanov, L. J. Bourhis, R. J. Gildea, J. A. K. Howard and H. Puschmann. *J. Appl. Cryst.* (2009). 42, 339-341
5. a) Sheldrick, G. M. *Acta Cryst.* **2008**, A64, 112-122; b) *Sheldrick, G. M. Acta Cryst.* **2015**, C71, 3-8

## Complex\_2

molecular structure complex\_2 with 50% ellipsoids

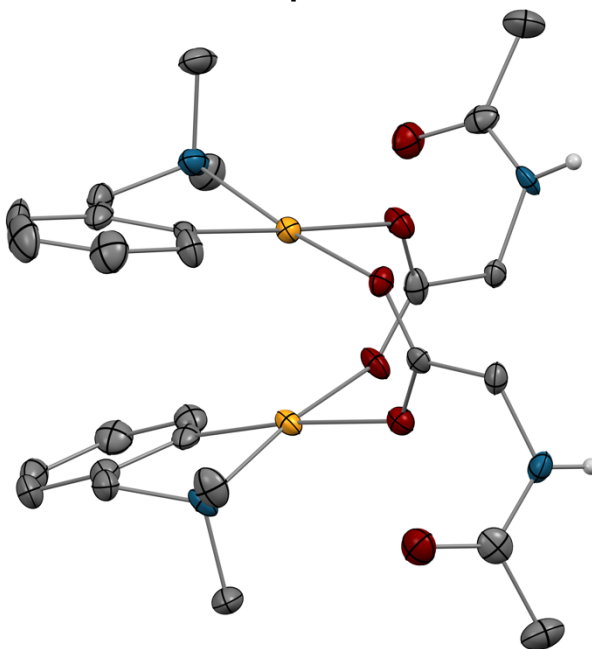

asymmetric unit complex\_2 with 50% ellipsoids

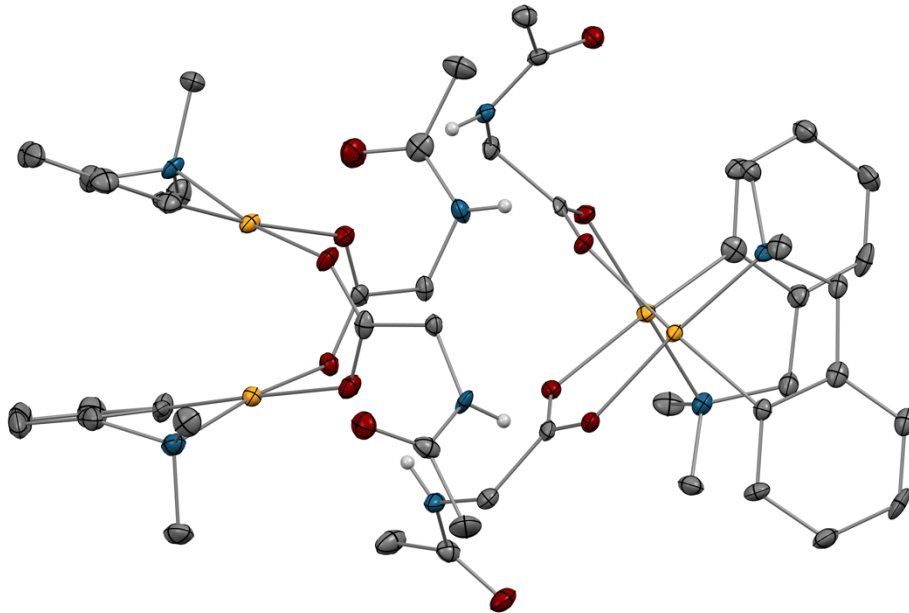

unit cell complex\_2 with hydrogen bonds

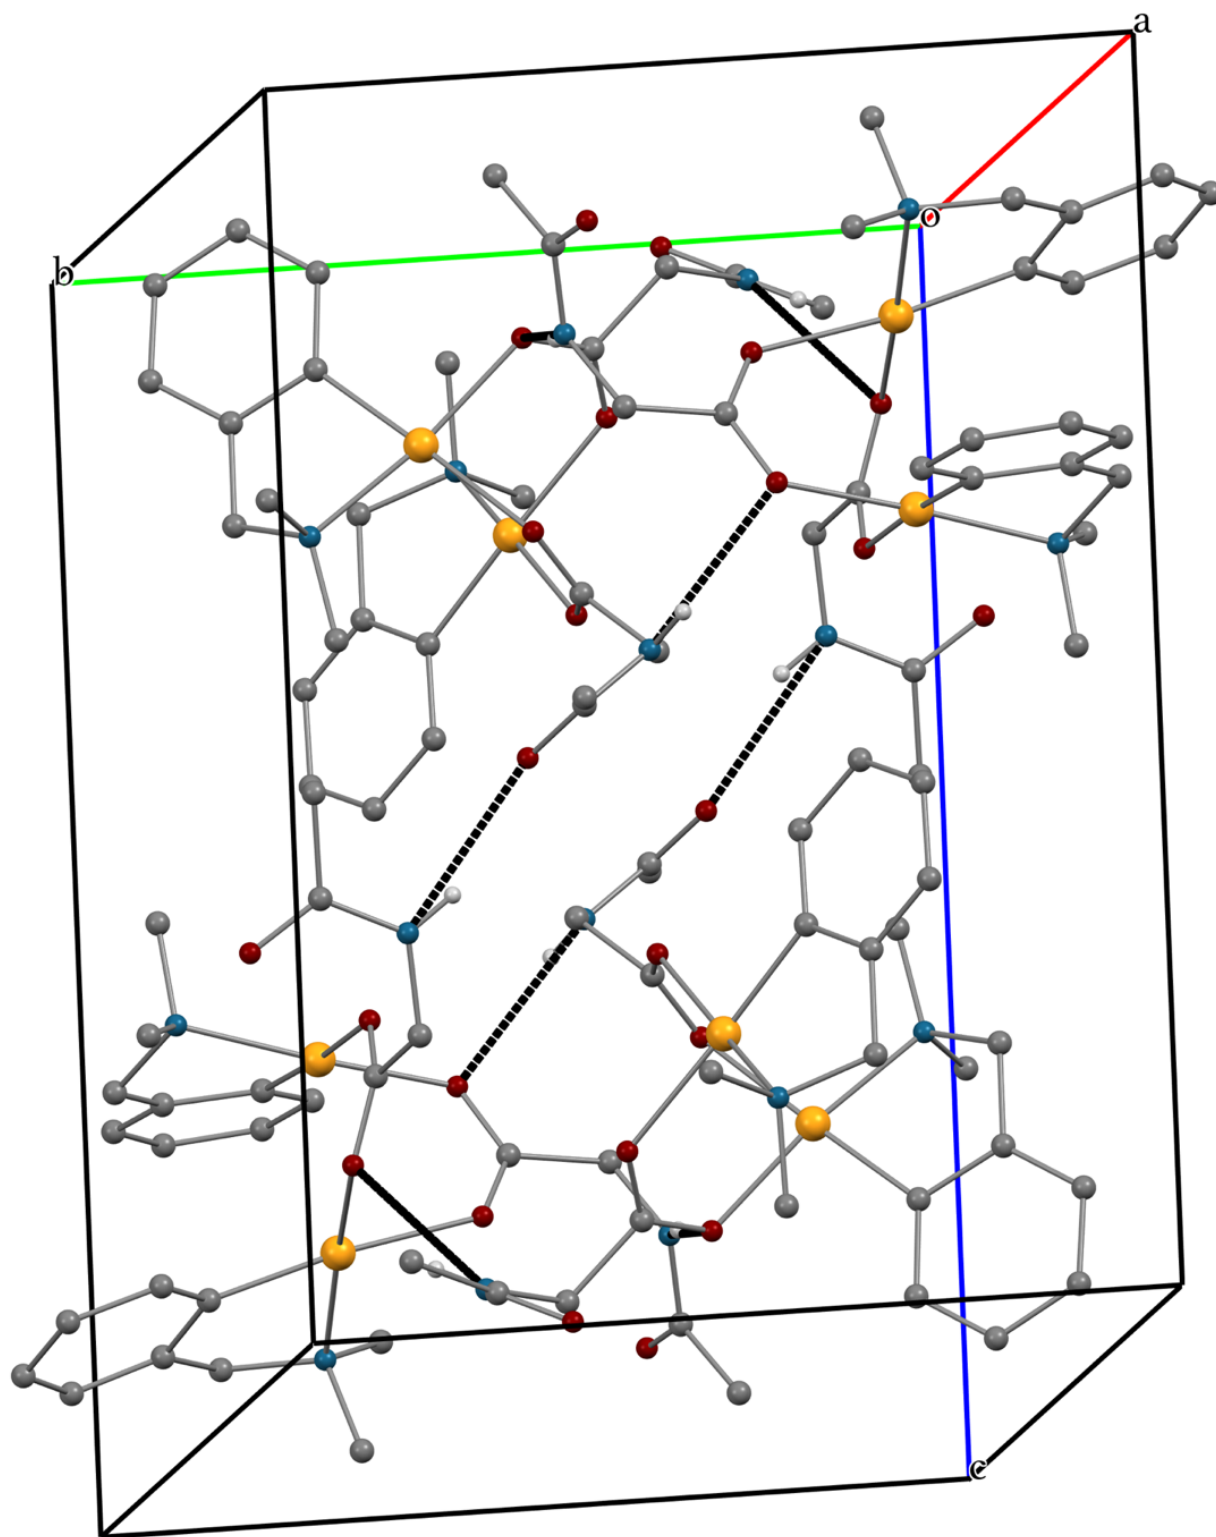

**Table 1 Crystal data and structure refinement for complex\_2.**

|                                             |                                                                                |
|---------------------------------------------|--------------------------------------------------------------------------------|
| Identification code                         | complex_2                                                                      |
| Empirical formula                           | C <sub>52</sub> H <sub>72</sub> N <sub>8</sub> O <sub>12</sub> Pd <sub>4</sub> |
| Formula weight                              | 1426.77                                                                        |
| Temperature/K                               | 100(2)                                                                         |
| Crystal system                              | triclinic                                                                      |
| Space group                                 | P-1                                                                            |
| a/Å                                         | 12.609(3)                                                                      |
| b/Å                                         | 12.998(3)                                                                      |
| c/Å                                         | 18.154(4)                                                                      |
| α/°                                         | 81.932(7)                                                                      |
| β/°                                         | 84.577(7)                                                                      |
| γ/°                                         | 82.253(7)                                                                      |
| Volume/Å <sup>3</sup>                       | 2910.0(11)                                                                     |
| Z                                           | 2                                                                              |
| ρ <sub>calc</sub> /cm <sup>3</sup>          | 1.628                                                                          |
| μ/mm <sup>-1</sup>                          | 1.280                                                                          |
| F(000)                                      | 1440.0                                                                         |
| Crystal size/mm <sup>3</sup>                | 0.32 × 0.22 × 0.14                                                             |
| Radiation                                   | MoKα (λ = 0.71073)                                                             |
| 2θ range for data collection/°              | 4.278 to 52.864                                                                |
| Index ranges                                | -15 ≤ h ≤ 15, -15 ≤ k ≤ 14, -22 ≤ l ≤ 22                                       |
| Reflections collected                       | 35886                                                                          |
| Independent reflections                     | 11497 [R <sub>int</sub> = 0.0649, R <sub>sigma</sub> = 0.0871]                 |
| Data/restraints/parameters                  | 11497/4/709                                                                    |
| Goodness-of-fit on F <sup>2</sup>           | 1.026                                                                          |
| Final R indexes [I ≥ 2σ (I)]                | R <sub>1</sub> = 0.0510, wR <sub>2</sub> = 0.0998                              |
| Final R indexes [all data]                  | R <sub>1</sub> = 0.0887, wR <sub>2</sub> = 0.1112                              |
| Largest diff. peak/hole / e Å <sup>-3</sup> | 1.48/-1.04                                                                     |

**Table 2 Fractional Atomic Coordinates ( $\times 10^4$ ) and Equivalent Isotropic Displacement Parameters ( $\text{\AA}^2 \times 10^3$ ) for complex\_2.  $U_{eq}$  is defined as 1/3 of the trace of the orthogonalised  $U_{ij}$  tensor.**

| Atom | <i>x</i>  | <i>y</i>  | <i>z</i>  | $U_{eq}$  |
|------|-----------|-----------|-----------|-----------|
| Pd1  | 1956.2(3) | 7644.1(3) | 8145.3(2) | 13.66(12) |
| Pd2  | 1592.7(3) | 7695.5(3) | 6542.6(2) | 13.00(11) |
| Pd3  | 6707.3(4) | 4320.3(4) | 7285.2(2) | 15.32(12) |
| Pd4  | 5063.7(4) | 2918.5(4) | 7813.6(2) | 14.65(12) |
| N1   | 534(4)    | 7480(4)   | 8783(3)   | 16.0(11)  |
| N2   | 1468(4)   | 9279(4)   | 6176(3)   | 14.5(11)  |
| N3   | 5483(4)   | 7592(4)   | 6141(3)   | 13.4(11)  |
| N4   | 2274(4)   | 3910(4)   | 8223(3)   | 18.4(12)  |
| N5   | 7925(4)   | 4030(4)   | 7997(3)   | 17.3(11)  |
| N6   | 5426(4)   | 1692(4)   | 7195(3)   | 20.8(12)  |
| N7   | 3061(4)   | 4946(4)   | 5777(3)   | 16.9(11)  |
| N8   | 4662(4)   | 6640(4)   | 8900(3)   | 19.0(12)  |
| O1   | 3491(3)   | 7820(3)   | 7675(2)   | 16.1(9)   |
| O2   | 3302(3)   | 7517(3)   | 6503(2)   | 14.9(9)   |
| O3   | 5128(3)   | 9321(3)   | 6165(2)   | 20.8(10)  |
| O4   | 2191(3)   | 6028(3)   | 7965(2)   | 15.1(9)   |
| O5   | 1578(3)   | 6106(3)   | 6829(2)   | 15.7(9)   |
| O6   | 676(3)    | 3817(3)   | 8884(2)   | 25.5(10)  |
| O7   | 5667(3)   | 4780(3)   | 6466(2)   | 19.8(9)   |
| O8   | 4249(3)   | 3960(3)   | 6950(2)   | 20(1)     |
| O9   | 3867(3)   | 3701(3)   | 5096(2)   | 25.2(10)  |
| O10  | 4564(3)   | 4002(3)   | 8542(2)   | 16.5(9)   |
| O11  | 5622(3)   | 5204(3)   | 8015(2)   | 17.2(9)   |
| O12  | 6212(4)   | 6054(3)   | 9426(2)   | 29.1(11)  |
| C1   | 1666(5)   | 9077(5)   | 8411(3)   | 19.2(14)  |
| C2   | 2369(5)   | 9792(5)   | 8374(3)   | 18.9(14)  |
| C3   | 2045(5)   | 10797(5)  | 8562(3)   | 23.8(15)  |
| C4   | 978(5)    | 11066(5)  | 8814(4)   | 28.4(16)  |
| C5   | 267(5)    | 10340(5)  | 8881(4)   | 27.3(16)  |
| C6   | 592(5)    | 9357(5)   | 8684(3)   | 19.6(14)  |
| C7   | -131(5)   | 8515(5)   | 8714(4)   | 21.0(14)  |
| C8   | -90(5)    | 6676(5)   | 8582(4)   | 21.9(14)  |
| C9   | 817(5)    | 7171(5)   | 9569(3)   | 24.3(15)  |
| C10  | 28(5)     | 7951(4)   | 6537(3)   | 14.7(13)  |
| C11  | -671(5)   | 7208(5)   | 6542(3)   | 18.5(14)  |
| C12  | -1773(5)  | 7519(5)   | 6586(4)   | 24.2(15)  |
| C13  | -2176(5)  | 8558(5)   | 6605(3)   | 25.6(16)  |
| C14  | -1480(5)  | 9300(5)   | 6569(3)   | 22.1(14)  |

|     |         |         |         |          |
|-----|---------|---------|---------|----------|
| C15 | -380(5) | 9006(5) | 6537(3) | 18.3(14) |
| C16 | 424(4)  | 9750(5) | 6531(3) | 17.8(13) |
| C17 | 2346(5) | 9818(5) | 6369(3) | 19.0(14) |
| C18 | 1428(5) | 9433(5) | 5350(3) | 21.7(14) |
| C19 | 3843(5) | 7610(4) | 7028(3) | 13.8(13) |
| C20 | 5062(4) | 7393(5) | 6902(3) | 15.7(13) |
| C21 | 5502(5) | 8586(5) | 5823(3) | 16.6(13) |
| C22 | 6055(5) | 8752(5) | 5056(3) | 21.0(14) |
| C23 | 1884(4) | 5626(4) | 7447(3) | 14.7(13) |
| C24 | 1835(5) | 4453(4) | 7548(3) | 16.4(13) |
| C25 | 1662(5) | 3667(5) | 8854(3) | 18.5(14) |
| C26 | 2267(5) | 3182(5) | 9518(4) | 29.8(17) |
| C27 | 7800(5) | 3600(4) | 6617(3) | 18.5(14) |
| C28 | 7770(5) | 3617(5) | 5856(3) | 21.3(14) |
| C29 | 8630(5) | 3118(5) | 5452(4) | 26.8(16) |
| C30 | 9528(5) | 2630(5) | 5793(4) | 27.2(16) |
| C31 | 9552(5) | 2609(5) | 6569(4) | 26.6(16) |
| C32 | 8701(5) | 3092(5) | 6977(3) | 20.7(14) |
| C33 | 8634(5) | 3074(5) | 7808(3) | 20.9(14) |
| C34 | 8535(5) | 4945(5) | 7844(4) | 25.7(15) |
| C35 | 7578(5) | 3895(5) | 8814(3) | 28.4(16) |
| C36 | 5792(5) | 1925(5) | 8576(3) | 18.3(14) |
| C37 | 5740(5) | 1981(5) | 9339(3) | 23.5(15) |
| C38 | 6351(6) | 1238(6) | 9804(4) | 35.0(18) |
| C39 | 7009(6) | 429(6)  | 9506(4) | 36.9(18) |
| C40 | 7044(5) | 340(5)  | 8750(4) | 31.5(17) |
| C41 | 6437(5) | 1091(5) | 8287(4) | 23.3(15) |
| C42 | 6442(5) | 1088(5) | 7468(4) | 23.8(15) |
| C43 | 5550(5) | 1985(5) | 6376(3) | 28.0(16) |
| C44 | 4545(5) | 1005(5) | 7381(4) | 29.8(16) |
| C45 | 4704(5) | 4605(5) | 6492(3) | 18.7(14) |
| C46 | 4057(4) | 5285(4) | 5906(3) | 15.5(13) |
| C47 | 3033(5) | 4167(5) | 5370(3) | 21.2(14) |
| C48 | 1934(5) | 3893(6) | 5271(4) | 35.1(18) |
| C49 | 4900(5) | 4886(5) | 8467(3) | 15.6(13) |
| C50 | 4299(5) | 5627(4) | 8991(3) | 18.1(13) |
| C51 | 5636(5) | 6764(5) | 9074(3) | 22.8(15) |
| C52 | 5995(6) | 7826(5) | 8830(4) | 31.8(17) |



**Table 3 Anisotropic Displacement Parameters ( $\text{\AA}^2 \times 10^3$ ) for complex\_2. The Anisotropic displacement factor exponent takes the form:  $-2\pi^2[h^2a^{*2}U_{11}+2hka^*b^*U_{12}+\dots]$ .**

| Atom | $U_{11}$ | $U_{22}$ | $U_{33}$ | $U_{23}$  | $U_{13}$  | $U_{12}$  |
|------|----------|----------|----------|-----------|-----------|-----------|
| Pd1  | 11.6(2)  | 14.7(3)  | 14.1(2)  | -1.11(18) | 0.74(19)  | -1.50(18) |
| Pd2  | 9.1(2)   | 14.0(3)  | 14.9(2)  | -0.08(18) | -0.44(18) | -0.33(18) |
| Pd3  | 10.6(2)  | 19.7(3)  | 15.2(2)  | 0.41(19)  | -2.14(19) | -1.80(19) |
| Pd4  | 12.8(2)  | 14.9(3)  | 16.2(3)  | -2.41(19) | -1.09(19) | -1.05(19) |
| N1   | 13(3)    | 20(3)    | 15(3)    | -2(2)     | -1(2)     | 0(2)      |
| N2   | 12(3)    | 18(3)    | 11(3)    | 2(2)      | 1(2)      | -3(2)     |
| N3   | 11(3)    | 16(3)    | 14(3)    | -7(2)     | 2(2)      | -2(2)     |
| N4   | 14(3)    | 18(3)    | 23(3)    | 5(2)      | -3(2)     | -4(2)     |
| N5   | 10(3)    | 26(3)    | 15(3)    | -1(2)     | -4(2)     | -2(2)     |
| N6   | 17(3)    | 22(3)    | 26(3)    | -9(2)     | 0(2)      | -4(2)     |
| N7   | 7(3)     | 24(3)    | 19(3)    | -6(2)     | -4(2)     | 2(2)      |
| N8   | 23(3)    | 12(3)    | 22(3)    | -2(2)     | -6(2)     | 2(2)      |
| O1   | 12(2)    | 19(2)    | 18(2)    | -4.9(18)  | 1.8(18)   | -3.1(17)  |
| O2   | 9(2)     | 19(2)    | 16(2)    | -2.2(17)  | -0.6(17)  | -0.5(17)  |
| O3   | 20(2)    | 19(2)    | 22(2)    | -2.7(19)  | 1.9(19)   | -2.3(19)  |
| O4   | 13(2)    | 14(2)    | 18(2)    | -1.2(17)  | 0.3(18)   | -1.6(17)  |
| O5   | 11(2)    | 15(2)    | 21(2)    | -0.6(18)  | -2.3(18)  | -0.4(17)  |
| O6   | 14(2)    | 34(3)    | 26(3)    | 2(2)      | 0(2)      | -5(2)     |
| O7   | 11(2)    | 28(3)    | 19(2)    | 2.2(18)   | -3.7(18)  | 0.3(18)   |
| O8   | 14(2)    | 26(3)    | 18(2)    | 1.2(19)   | -2.9(19)  | -0.3(19)  |
| O9   | 26(3)    | 25(3)    | 24(3)    | -8(2)     | 4(2)      | -1(2)     |
| O10  | 18(2)    | 15(2)    | 16(2)    | -3.9(17)  | 0.9(18)   | 0.4(18)   |
| O11  | 14(2)    | 19(2)    | 18(2)    | -2.0(18)  | -0.8(19)  | -2.5(18)  |
| O12  | 30(3)    | 29(3)    | 29(3)    | -2(2)     | -12(2)    | -1(2)     |
| C1   | 25(4)    | 24(4)    | 10(3)    | -1(3)     | -6(3)     | -3(3)     |
| C2   | 18(3)    | 23(4)    | 16(3)    | 1(3)      | 0(3)      | -5(3)     |
| C3   | 26(4)    | 18(4)    | 28(4)    | -5(3)     | 1(3)      | -5(3)     |
| C4   | 30(4)    | 14(4)    | 41(4)    | -8(3)     | 1(3)      | -1(3)     |
| C5   | 16(3)    | 36(4)    | 28(4)    | -10(3)    | 0(3)      | 11(3)     |
| C6   | 17(3)    | 20(4)    | 21(3)    | -2(3)     | 3(3)      | 0(3)      |
| C7   | 16(3)    | 21(4)    | 23(4)    | 1(3)      | 0(3)      | 3(3)      |
| C8   | 23(3)    | 17(3)    | 27(4)    | -4(3)     | 2(3)      | -8(3)     |
| C9   | 31(4)    | 28(4)    | 14(3)    | 2(3)      | 1(3)      | -11(3)    |
| C10  | 14(3)    | 16(3)    | 13(3)    | -3(2)     | 0(3)      | 0(2)      |
| C11  | 13(3)    | 24(4)    | 20(3)    | -4(3)     | 1(3)      | -8(3)     |
| C12  | 13(3)    | 30(4)    | 31(4)    | 1(3)      | -4(3)     | -7(3)     |
| C13  | 8(3)     | 41(5)    | 25(4)    | -4(3)     | -2(3)     | 7(3)      |
| C14  | 18(3)    | 25(4)    | 21(4)    | -1(3)     | -1(3)     | 4(3)      |
| C15  | 18(3)    | 23(4)    | 11(3)    | 0(3)      | 0(3)      | 1(3)      |

|     |       |       |       |        |        |        |
|-----|-------|-------|-------|--------|--------|--------|
| C16 | 15(3) | 19(3) | 17(3) | 1(3)   | 0(3)   | 3(3)   |
| C17 | 19(3) | 15(3) | 23(3) | 1(3)   | -3(3)  | -3(3)  |
| C18 | 21(3) | 25(4) | 17(3) | 1(3)   | 2(3)   | -1(3)  |
| C19 | 14(3) | 9(3)  | 16(3) | 7(2)   | -2(3)  | 1(2)   |
| C20 | 15(3) | 17(3) | 13(3) | 2(2)   | -3(3)  | 2(3)   |
| C21 | 12(3) | 18(4) | 21(3) | 1(3)   | -4(3)  | -6(3)  |
| C22 | 22(3) | 21(4) | 19(3) | 0(3)   | -2(3)  | -5(3)  |
| C23 | 10(3) | 14(3) | 18(3) | -2(3)  | 2(3)   | 2(2)   |
| C24 | 12(3) | 20(3) | 17(3) | -3(3)  | 0(3)   | -2(3)  |
| C25 | 21(4) | 18(3) | 16(3) | 2(3)   | -3(3)  | -4(3)  |
| C26 | 21(4) | 40(4) | 28(4) | 8(3)   | -8(3)  | -9(3)  |
| C27 | 17(3) | 13(3) | 24(4) | 0(3)   | 6(3)   | -5(3)  |
| C28 | 19(3) | 22(4) | 21(4) | 3(3)   | 2(3)   | -5(3)  |
| C29 | 29(4) | 27(4) | 23(4) | 2(3)   | 3(3)   | -7(3)  |
| C30 | 20(4) | 20(4) | 40(4) | -7(3)  | 8(3)   | -1(3)  |
| C31 | 15(3) | 23(4) | 41(4) | -5(3)  | -4(3)  | 3(3)   |
| C32 | 19(3) | 17(3) | 27(4) | -2(3)  | -2(3)  | -3(3)  |
| C33 | 18(3) | 18(4) | 26(4) | -1(3)  | -5(3)  | 0(3)   |
| C34 | 21(4) | 16(4) | 41(4) | -3(3)  | -2(3)  | -6(3)  |
| C35 | 26(4) | 38(4) | 21(4) | -4(3)  | -9(3)  | 1(3)   |
| C36 | 9(3)  | 14(3) | 31(4) | 4(3)   | -4(3)  | -3(2)  |
| C37 | 19(3) | 26(4) | 23(4) | 0(3)   | -4(3)  | 5(3)   |
| C38 | 39(4) | 33(4) | 30(4) | 4(3)   | -3(3)  | -1(4)  |
| C39 | 33(4) | 35(5) | 36(5) | 13(3)  | -8(4)  | 7(3)   |
| C40 | 24(4) | 16(4) | 48(5) | 3(3)   | 5(3)   | 7(3)   |
| C41 | 18(3) | 15(3) | 35(4) | -2(3)  | 7(3)   | -4(3)  |
| C42 | 18(3) | 16(3) | 37(4) | -7(3)  | 5(3)   | 0(3)   |
| C43 | 31(4) | 31(4) | 24(4) | -12(3) | 0(3)   | -3(3)  |
| C44 | 25(4) | 25(4) | 44(4) | -16(3) | 4(3)   | -11(3) |
| C45 | 20(4) | 21(4) | 15(3) | -8(3)  | -3(3)  | 5(3)   |
| C46 | 14(3) | 13(3) | 19(3) | -5(2)  | -2(3)  | 2(2)   |
| C47 | 28(4) | 18(4) | 19(3) | 2(3)   | -6(3)  | -7(3)  |
| C48 | 27(4) | 32(4) | 50(5) | -9(4)  | -10(4) | -12(3) |
| C49 | 15(3) | 16(3) | 17(3) | -1(3)  | -9(3)  | 0(3)   |
| C50 | 18(3) | 15(3) | 20(3) | -4(3)  | -3(3)  | 4(3)   |
| C51 | 25(4) | 31(4) | 14(3) | -9(3)  | 0(3)   | -2(3)  |
| C52 | 40(4) | 25(4) | 33(4) | -7(3)  | -1(3)  | -14(3) |

**Table 4 Bond Lengths for complex\_2.**

| Atom | Atom | Length/Å  | Atom | Atom | Length/Å  |
|------|------|-----------|------|------|-----------|
| Pd1  | Pd2  | 2.9780(9) | O6   | C25  | 1.230(7)  |
| Pd1  | N1   | 2.059(5)  | O7   | C45  | 1.260(7)  |
| Pd1  | O1   | 2.068(4)  | O8   | C45  | 1.252(7)  |
| Pd1  | O4   | 2.148(4)  | O9   | C47  | 1.239(7)  |
| Pd1  | C1   | 1.968(6)  | O10  | C49  | 1.262(7)  |
| Pd2  | N2   | 2.062(5)  | O11  | C49  | 1.240(7)  |
| Pd2  | O2   | 2.131(4)  | O12  | C51  | 1.237(7)  |
| Pd2  | O5   | 2.060(4)  | C1   | C2   | 1.359(8)  |
| Pd2  | C10  | 1.957(6)  | C1   | C6   | 1.414(8)  |
| Pd3  | Pd4  | 2.9473(8) | C2   | C3   | 1.395(9)  |
| Pd3  | N5   | 2.062(5)  | C3   | C4   | 1.395(9)  |
| Pd3  | O7   | 2.050(4)  | C4   | C5   | 1.372(9)  |
| Pd3  | O11  | 2.146(4)  | C5   | C6   | 1.374(9)  |
| Pd3  | C27  | 1.975(6)  | C6   | C7   | 1.508(8)  |
| Pd4  | N6   | 2.054(5)  | C10  | C11  | 1.391(8)  |
| Pd4  | O8   | 2.164(4)  | C10  | C15  | 1.398(8)  |
| Pd4  | O10  | 2.063(4)  | C11  | C12  | 1.392(8)  |
| Pd4  | C36  | 1.961(6)  | C12  | C13  | 1.381(9)  |
| N1   | C7   | 1.482(7)  | C13  | C14  | 1.379(9)  |
| N1   | C8   | 1.491(7)  | C14  | C15  | 1.387(8)  |
| N1   | C9   | 1.491(7)  | C15  | C16  | 1.491(8)  |
| N2   | C16  | 1.502(7)  | C19  | C20  | 1.527(8)  |
| N2   | C17  | 1.480(7)  | C21  | C22  | 1.498(8)  |
| N2   | C18  | 1.490(7)  | C23  | C24  | 1.519(8)  |
| N3   | C20  | 1.433(7)  | C25  | C26  | 1.503(8)  |
| N3   | C21  | 1.342(7)  | C27  | C28  | 1.383(8)  |
| N4   | C24  | 1.444(7)  | C27  | C32  | 1.403(8)  |
| N4   | C25  | 1.344(8)  | C28  | C29  | 1.388(9)  |
| N5   | C33  | 1.490(8)  | C29  | C30  | 1.377(9)  |
| N5   | C34  | 1.483(7)  | C30  | C31  | 1.408(9)  |
| N5   | C35  | 1.499(8)  | C31  | C32  | 1.376(9)  |
| N6   | C42  | 1.498(8)  | C32  | C33  | 1.500(8)  |
| N6   | C43  | 1.481(8)  | C36  | C37  | 1.392(9)  |
| N6   | C44  | 1.502(8)  | C36  | C41  | 1.398(8)  |
| N7   | C46  | 1.434(7)  | C37  | C38  | 1.391(9)  |
| N7   | C47  | 1.340(8)  | C38  | C39  | 1.388(10) |
| N8   | C50  | 1.435(8)  | C39  | C40  | 1.390(10) |
| N8   | C51  | 1.331(8)  | C40  | C41  | 1.392(9)  |
| O1   | C19  | 1.269(7)  | C41  | C42  | 1.487(9)  |
| O2   | C19  | 1.251(7)  | C45  | C46  | 1.511(8)  |

|    |     |          |     |     |          |
|----|-----|----------|-----|-----|----------|
| O3 | C21 | 1.230(7) | C47 | C48 | 1.510(9) |
| O4 | C23 | 1.252(7) | C49 | C50 | 1.527(8) |
| O5 | C23 | 1.273(7) | C51 | C52 | 1.506(9) |

**Table 5 Bond Angles for complex\_2.**

| Atom | Atom | Atom | Angle/°    | Atom | Atom | Atom | Angle/°  |
|------|------|------|------------|------|------|------|----------|
| N1   | Pd1  | Pd2  | 109.24(13) | C49  | O10  | Pd4  | 122.6(4) |
| N1   | Pd1  | O1   | 170.27(17) | C49  | O11  | Pd3  | 127.7(4) |
| N1   | Pd1  | O4   | 92.66(17)  | C2   | C1   | Pd1  | 127.7(5) |
| O1   | Pd1  | Pd2  | 80.49(11)  | C2   | C1   | C6   | 118.3(6) |
| O1   | Pd1  | O4   | 90.14(15)  | C6   | C1   | Pd1  | 114.0(4) |
| O4   | Pd1  | Pd2  | 75.56(10)  | C1   | C2   | C3   | 121.7(6) |
| C1   | Pd1  | Pd2  | 109.00(16) | C4   | C3   | C2   | 119.1(6) |
| C1   | Pd1  | N1   | 82.3(2)    | C5   | C4   | C3   | 119.8(6) |
| C1   | Pd1  | O1   | 94.4(2)    | C4   | C5   | C6   | 120.5(6) |
| C1   | Pd1  | O4   | 174.0(2)   | C1   | C6   | C7   | 114.8(5) |
| N2   | Pd2  | Pd1  | 101.66(13) | C5   | C6   | C1   | 120.5(6) |
| N2   | Pd2  | O2   | 93.90(17)  | C5   | C6   | C7   | 124.7(6) |
| O2   | Pd2  | Pd1  | 78.61(10)  | N1   | C7   | C6   | 108.8(5) |
| O5   | Pd2  | Pd1  | 83.63(11)  | C11  | C10  | Pd2  | 127.0(4) |
| O5   | Pd2  | N2   | 173.32(16) | C11  | C10  | C15  | 119.8(5) |
| O5   | Pd2  | O2   | 91.15(15)  | C15  | C10  | Pd2  | 113.2(4) |
| C10  | Pd2  | Pd1  | 103.15(16) | C10  | C11  | C12  | 119.4(6) |
| C10  | Pd2  | N2   | 82.4(2)    | C13  | C12  | C11  | 120.7(6) |
| C10  | Pd2  | O2   | 176.1(2)   | C14  | C13  | C12  | 119.8(6) |
| C10  | Pd2  | O5   | 92.5(2)    | C13  | C14  | C15  | 120.5(6) |
| N5   | Pd3  | Pd4  | 109.42(14) | C10  | C15  | C16  | 116.4(5) |
| N5   | Pd3  | O11  | 94.55(17)  | C14  | C15  | C10  | 119.7(6) |
| O7   | Pd3  | Pd4  | 80.55(11)  | C14  | C15  | C16  | 123.9(6) |
| O7   | Pd3  | N5   | 169.96(18) | C15  | C16  | N2   | 107.9(5) |
| O7   | Pd3  | O11  | 88.76(15)  | O1   | C19  | C20  | 115.3(5) |
| O11  | Pd3  | Pd4  | 76.65(11)  | O2   | C19  | O1   | 127.2(5) |
| C27  | Pd3  | Pd4  | 108.48(17) | O2   | C19  | C20  | 117.3(5) |
| C27  | Pd3  | N5   | 82.6(2)    | N3   | C20  | C19  | 115.0(5) |
| C27  | Pd3  | O7   | 93.4(2)    | N3   | C21  | C22  | 116.9(5) |
| C27  | Pd3  | O11  | 174.7(2)   | O3   | C21  | N3   | 120.9(6) |
| N6   | Pd4  | Pd3  | 104.83(14) | O3   | C21  | C22  | 122.1(5) |
| N6   | Pd4  | O8   | 94.95(18)  | O4   | C23  | O5   | 126.6(5) |
| N6   | Pd4  | O10  | 171.37(18) | O4   | C23  | C24  | 118.9(5) |
| O8   | Pd4  | Pd3  | 79.43(11)  | O5   | C23  | C24  | 114.5(5) |
| O10  | Pd4  | Pd3  | 83.42(11)  | N4   | C24  | C23  | 113.7(5) |
| O10  | Pd4  | O8   | 89.00(15)  | N4   | C25  | C26  | 115.4(5) |
| C36  | Pd4  | Pd3  | 101.95(16) | O6   | C25  | N4   | 122.3(5) |
| C36  | Pd4  | N6   | 82.8(2)    | O6   | C25  | C26  | 122.4(6) |
| C36  | Pd4  | O8   | 177.6(2)   | C28  | C27  | Pd3  | 126.2(5) |
| C36  | Pd4  | O10  | 93.1(2)    | C28  | C27  | C32  | 120.1(6) |

|     |    |     |          |     |     |     |          |
|-----|----|-----|----------|-----|-----|-----|----------|
| C7  | N1 | Pd1 | 107.6(4) | C32 | C27 | Pd3 | 113.5(4) |
| C7  | N1 | C8  | 109.5(5) | C27 | C28 | C29 | 119.6(6) |
| C7  | N1 | C9  | 109.7(5) | C30 | C29 | C28 | 121.1(6) |
| C8  | N1 | Pd1 | 115.1(4) | C29 | C30 | C31 | 119.0(6) |
| C8  | N1 | C9  | 108.2(5) | C32 | C31 | C30 | 120.4(6) |
| C9  | N1 | Pd1 | 106.5(4) | C27 | C32 | C33 | 116.0(5) |
| C16 | N2 | Pd2 | 106.2(3) | C31 | C32 | C27 | 119.7(6) |
| C17 | N2 | Pd2 | 115.0(3) | C31 | C32 | C33 | 124.2(6) |
| C17 | N2 | C16 | 108.9(5) | N5  | C33 | C32 | 107.8(5) |
| C17 | N2 | C18 | 108.8(4) | C37 | C36 | Pd4 | 127.4(5) |
| C18 | N2 | Pd2 | 108.4(4) | C37 | C36 | C41 | 119.2(6) |
| C18 | N2 | C16 | 109.4(4) | C41 | C36 | Pd4 | 113.4(5) |
| C21 | N3 | C20 | 119.1(5) | C38 | C37 | C36 | 120.5(6) |
| C25 | N4 | C24 | 122.9(5) | C39 | C38 | C37 | 119.7(7) |
| C33 | N5 | Pd3 | 108.0(3) | C38 | C39 | C40 | 120.7(6) |
| C33 | N5 | C35 | 109.4(5) | C39 | C40 | C41 | 119.3(6) |
| C34 | N5 | Pd3 | 106.4(4) | C36 | C41 | C42 | 115.7(6) |
| C34 | N5 | C33 | 109.5(5) | C40 | C41 | C36 | 120.6(6) |
| C34 | N5 | C35 | 107.5(5) | C40 | C41 | C42 | 123.7(6) |
| C35 | N5 | Pd3 | 115.8(4) | C41 | C42 | N6  | 109.4(5) |
| C42 | N6 | Pd4 | 106.2(4) | O7  | C45 | C46 | 114.1(5) |
| C42 | N6 | C44 | 108.2(5) | O8  | C45 | O7  | 127.1(5) |
| C43 | N6 | Pd4 | 115.6(4) | O8  | C45 | C46 | 118.8(5) |
| C43 | N6 | C42 | 110.2(5) | N7  | C46 | C45 | 116.4(5) |
| C43 | N6 | C44 | 109.0(5) | N7  | C47 | C48 | 116.2(6) |
| C44 | N6 | Pd4 | 107.4(4) | O9  | C47 | N7  | 121.4(6) |
| C47 | N7 | C46 | 121.5(5) | O9  | C47 | C48 | 122.4(6) |
| C51 | N8 | C50 | 121.5(5) | O10 | C49 | C50 | 113.7(5) |
| C19 | O1 | Pd1 | 124.4(4) | O11 | C49 | O10 | 127.5(6) |
| C19 | O2 | Pd2 | 125.4(4) | O11 | C49 | C50 | 118.8(5) |
| C23 | O4 | Pd1 | 128.2(4) | N8  | C50 | C49 | 114.2(5) |
| C23 | O5 | Pd2 | 122.4(4) | N8  | C51 | C52 | 116.3(6) |
| C45 | O7 | Pd3 | 126.7(4) | O12 | C51 | N8  | 122.2(6) |
| C45 | O8 | Pd4 | 123.4(4) | O12 | C51 | C52 | 121.4(6) |

## Complex\_6b

asymmetric unit complex\_6b with 40% ellipsoids

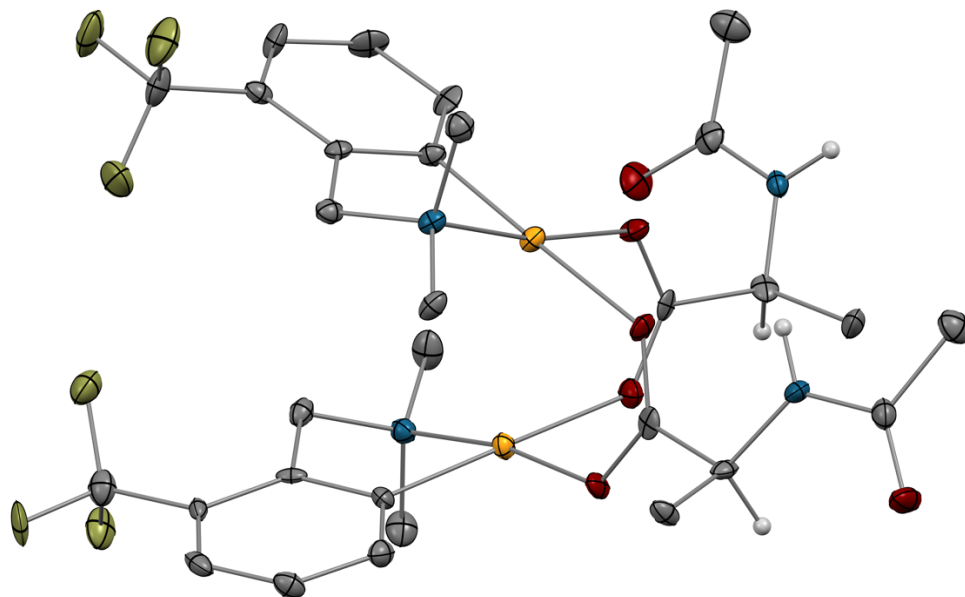

asymmetric unit complex\_6b with co-crystallized, hydrogen bonding acetonitrile

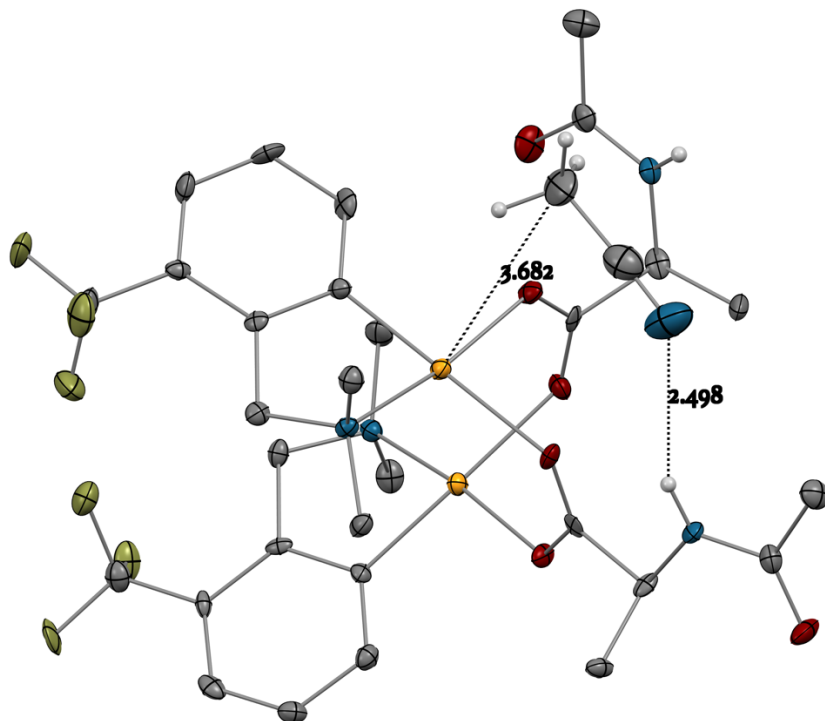

unit cell complex\_6b with hydrogen bonding network

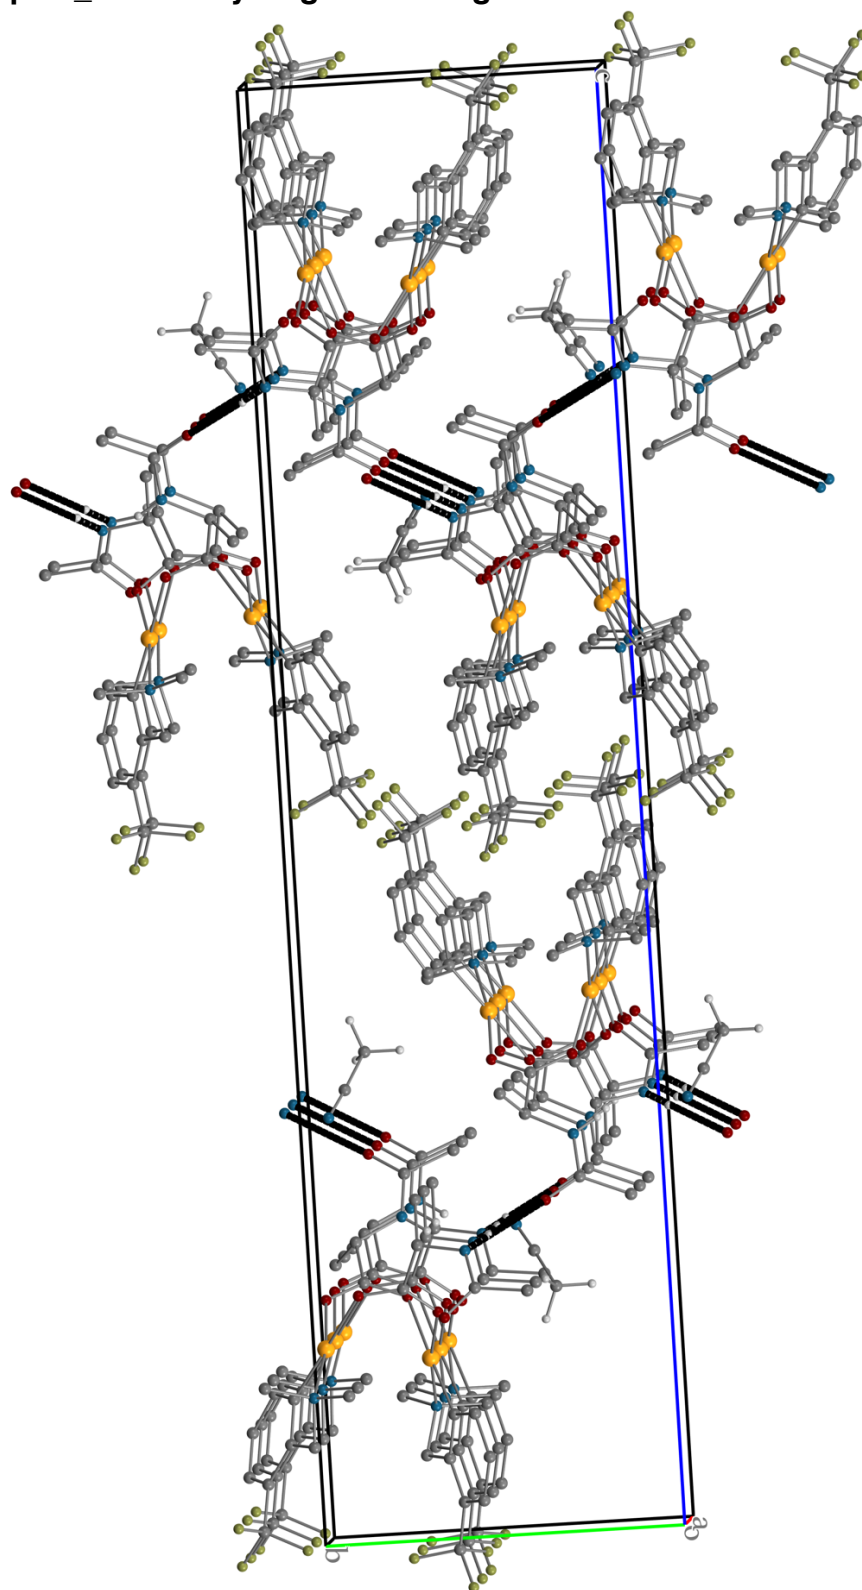



**Table 1 Crystal data and structure refinement for complex\_6b.**

|                                             |                                                                                              |
|---------------------------------------------|----------------------------------------------------------------------------------------------|
| Identification code                         | complex_6b                                                                                   |
| Empirical formula                           | C <sub>32</sub> H <sub>41</sub> F <sub>6</sub> N <sub>5</sub> O <sub>6</sub> Pd <sub>2</sub> |
| Formula weight                              | 918.50                                                                                       |
| Temperature/K                               | 100(2)                                                                                       |
| Crystal system                              | orthorhombic                                                                                 |
| Space group                                 | P2 <sub>1</sub> 2 <sub>1</sub> 2 <sub>1</sub>                                                |
| a/Å                                         | 9.3180(4)                                                                                    |
| b/Å                                         | 9.8627(4)                                                                                    |
| c/Å                                         | 40.0507(19)                                                                                  |
| α/°                                         | 90                                                                                           |
| β/°                                         | 90                                                                                           |
| γ/°                                         | 90                                                                                           |
| Volume/Å <sup>3</sup>                       | 3680.7(3)                                                                                    |
| Z                                           | 4                                                                                            |
| ρ <sub>calc</sub> /cm <sup>3</sup>          | 1.658                                                                                        |
| μ/mm <sup>-1</sup>                          | 1.056                                                                                        |
| F(000)                                      | 1848.0                                                                                       |
| Crystal size/mm <sup>3</sup>                | 0.34 × 0.16 × 0.14                                                                           |
| Radiation                                   | MoKα (λ = 0.71073)                                                                           |
| 2Θ range for data collection/°              | 4.254 to 52.728                                                                              |
| Index ranges                                | -11 ≤ h ≤ 11, -11 ≤ k ≤ 12, -44 ≤ l ≤ 49                                                     |
| Reflections collected                       | 39996                                                                                        |
| Independent reflections                     | 6909 [R <sub>int</sub> = 0.0715, R <sub>sigma</sub> = 0.0850]                                |
| Data/restraints/parameters                  | 6909/45/475                                                                                  |
| Goodness-of-fit on F <sup>2</sup>           | 1.046                                                                                        |
| Final R indexes [I ≥ 2σ (I)]                | R <sub>1</sub> = 0.0435, wR <sub>2</sub> = 0.0576                                            |
| Final R indexes [all data]                  | R <sub>1</sub> = 0.0728, wR <sub>2</sub> = 0.0620                                            |
| Largest diff. peak/hole / e Å <sup>-3</sup> | 0.67/-0.75                                                                                   |
| Flack parameter                             | 0.008(14)                                                                                    |

$$R_{\text{int}} = \frac{\sum |F_o^2 - \langle F_o^2 \rangle|}{\sum |F_o^2|}$$

$$R_1 = \frac{\sum ||F_o| - |F_c||}{\sum |F_o|}$$

$$wR_2 = \left[ \frac{\sum [w(F_o^2 - F_c^2)^2]}{\sum [w(F_o^2)^2]} \right]^{1/2}$$

$$\text{Goodness-of-fit} = \left[ \frac{\sum [w(F_o^2 - F_c^2)^2]}{(n-p)} \right]^{1/2}$$

n: number of independent reflections; p: number of refined parameters

**Table 2 Fractional Atomic Coordinates ( $\times 10^4$ ) and Equivalent Isotropic Displacement Parameters ( $\text{\AA}^2 \times 10^3$ ) for complex\_6b.  $U_{eq}$  is defined as 1/3 of of the trace of the orthogonalised  $U_{ij}$  tensor.**

| Atom | x         | y         | z          | U(eq)     |
|------|-----------|-----------|------------|-----------|
| Pd1  | 6673.5(5) | 4489.8(5) | 3614.3(2)  | 14.37(13) |
| Pd2  | 5832.8(5) | 1617.5(5) | 3721.4(2)  | 14.13(13) |
| O1   | 4982(4)   | 4453(5)   | 3290.3(10) | 17.3(10)  |
| O2   | 4574(4)   | 2196(4)   | 3299.6(10) | 16.0(11)  |
| O3   | 1787(6)   | 3112(4)   | 2324.5(11) | 27.0(12)  |
| O4   | 7965(4)   | 3473(5)   | 3257.1(10) | 18.5(11)  |
| O5   | 7493(5)   | 1304(4)   | 3400.9(11) | 17.1(11)  |
| O6   | 10869(5)  | 1046(5)   | 3424.2(12) | 28.4(12)  |
| N1   | 8350(6)   | 4864(5)   | 3936.6(13) | 15.1(13)  |
| N2   | 2989(6)   | 2259(6)   | 2759.8(14) | 16.3(14)  |
| N3   | 4183(6)   | 1588(5)   | 4062.3(12) | 13.7(11)  |
| N4   | 9567(5)   | 399(6)    | 2981.5(13) | 15.1(14)  |
| C1   | 5577(6)   | 5491(6)   | 3951.7(15) | 13.0(15)  |
| C2   | 4211(7)   | 6058(6)   | 3913.0(17) | 17.1(15)  |
| C3   | 3592(7)   | 6742(6)   | 4176.2(16) | 18.4(16)  |
| C4   | 4279(8)   | 6891(6)   | 4475.6(17) | 18.6(16)  |
| C5   | 5639(7)   | 6345(6)   | 4522.7(15) | 12.9(15)  |
| C6   | 6292(6)   | 5629(6)   | 4257.5(15) | 12.2(15)  |
| C7   | 7726(7)   | 4941(7)   | 4277.8(16) | 16.5(17)  |
| C8   | 6417(7)   | 6518(7)   | 4841.8(17) | 22.2(16)  |
| C9   | 8949(7)   | 6198(6)   | 3847.9(17) | 23.0(18)  |
| C10  | 9502(7)   | 3858(7)   | 3930.0(17) | 25.4(19)  |
| C11  | 4411(6)   | 3386(8)   | 3189.6(15) | 15.9(15)  |
| C12  | 3282(7)   | 3572(6)   | 2915.1(15) | 15.1(15)  |
| C13  | 1951(6)   | 4205(6)   | 3069.5(16) | 17.6(16)  |
| C14  | 2300(8)   | 2139(7)   | 2469.1(17) | 19.1(18)  |
| C15  | 2185(7)   | 736(6)    | 2328.7(17) | 24.9(18)  |
| C16  | 6923(7)   | 1031(6)   | 4111.3(16) | 14.5(16)  |
| C17  | 8267(7)   | 423(7)    | 4106.4(16) | 21.1(16)  |
| C18  | 8947(7)   | 70(6)     | 4405.2(18) | 24.5(18)  |
| C19  | 8285(7)   | 315(7)    | 4705.2(16) | 22.8(16)  |
| C20  | 6946(7)   | 890(6)    | 4715.7(16) | 14.4(16)  |
| C21  | 6250(6)   | 1247(6)   | 4414.9(16) | 13.0(16)  |
| C22  | 4804(7)   | 1913(6)   | 4392.5(16) | 15.7(17)  |
| C23  | 6230(8)   | 1118(8)   | 5042.1(17) | 26(2)     |
| C24  | 3597(7)   | 195(6)    | 4066.9(17) | 20.5(18)  |
| C25  | 2971(6)   | 2526(6)   | 3987.7(16) | 18.1(17)  |
| C26  | 8076(7)   | 2215(7)   | 3227.3(15) | 14.4(15)  |

|     |          |          |            |          |
|-----|----------|----------|------------|----------|
| C27 | 8965(7)  | 1726(7)  | 2928.0(15) | 17.8(16) |
| C28 | 8022(8)  | 1737(7)  | 2621.5(16) | 26.4(18) |
| C29 | 10476(7) | 164(7)   | 3234.8(18) | 20.5(18) |
| C30 | 10955(8) | -1299(6) | 3271.9(18) | 30.1(19) |
| F1  | 5677(5)  | 7206(4)  | 5072.3(9)  | 31.8(11) |
| F2  | 7666(4)  | 7193(4)  | 4803.1(9)  | 28.6(10) |
| F3  | 6785(4)  | 5330(4)  | 4985.0(9)  | 27.7(10) |
| F4  | 5840(5)  | 2417(4)  | 5087.4(10) | 40.7(12) |
| F5  | 7050(4)  | 783(4)   | 5302.0(9)  | 39.8(12) |
| F6  | 5018(4)  | 381(5)   | 5075(1)    | 39.3(11) |
| N5  | 4461(7)  | -687(8)  | 2906(2)    | 56(2)    |
| C31 | 5232(9)  | -1163(8) | 3086(2)    | 42(2)    |
| C32 | 6262(9)  | -1742(8) | 3333.2(19) | 46(2)    |

**Table 3 Anisotropic Displacement Parameters ( $\text{\AA}^2 \times 10^3$ ) for complex\_6b. The Anisotropic displacement factor exponent takes the form:  $-2\pi^2[h^2a^{*2}U_{11}+2hka^*b^*U_{12}+\dots]$ .**

| Atom | $U_{11}$ | $U_{22}$ | $U_{33}$ | $U_{23}$ | $U_{13}$ | $U_{12}$ |
|------|----------|----------|----------|----------|----------|----------|
| Pd1  | 15.1(3)  | 15.2(3)  | 12.9(3)  | -2.8(2)  | -2.3(2)  | 0.7(3)   |
| Pd2  | 13.3(2)  | 16.7(3)  | 12.4(3)  | 3.1(2)   | 0.3(2)   | 1.3(3)   |
| O1   | 23(2)    | 12(2)    | 16(3)    | -5(2)    | -10(2)   | 0(2)     |
| O2   | 17(3)    | 20(3)    | 11(3)    | 3(2)     | -5(2)    | 0(2)     |
| O3   | 40(3)    | 17(3)    | 24(3)    | 2(2)     | -17(3)   | 4(3)     |
| O4   | 22(3)    | 19(3)    | 15(3)    | -3(2)    | 5(2)     | 1(2)     |
| O5   | 18(3)    | 16(3)    | 17(3)    | 6(2)     | 2(2)     | 1(2)     |
| O6   | 28(3)    | 29(3)    | 28(3)    | -5(2)    | -10(3)   | -12(3)   |
| N1   | 16(3)    | 14(3)    | 16(3)    | -1(2)    | 1(3)     | 1(3)     |
| N2   | 22(4)    | 15(3)    | 12(4)    | 4(3)     | -1(3)    | 3(3)     |
| N3   | 11(3)    | 15(3)    | 15(3)    | 2(3)     | 0(3)     | 0(3)     |
| N4   | 17(3)    | 14(3)    | 14(3)    | -2(3)    | 1(2)     | -5(3)    |
| C1   | 17(4)    | 9(3)     | 13(4)    | -2(3)    | -1(3)    | 0(3)     |
| C2   | 19(4)    | 16(3)    | 16(4)    | 0(3)     | -4(3)    | -2(3)    |
| C3   | 15(4)    | 15(4)    | 25(4)    | -2(3)    | -2(3)    | 2(3)     |
| C4   | 23(4)    | 10(4)    | 23(4)    | -4(3)    | 5(4)     | -2(3)    |
| C5   | 20(4)    | 11(4)    | 8(4)     | -2(3)    | 1(3)     | -6(3)    |
| C6   | 9(4)     | 8(3)     | 20(4)    | 5(3)     | 0(3)     | -1(3)    |
| C7   | 17(4)    | 19(4)    | 13(4)    | 1(3)     | -1(3)    | -5(3)    |
| C8   | 19(4)    | 28(4)    | 19(4)    | -1(3)    | 3(3)     | -4(3)    |
| C9   | 19(4)    | 28(4)    | 22(4)    | -2(3)    | 0(3)     | -8(3)    |
| C10  | 16(4)    | 38(5)    | 22(4)    | -4(3)    | 1(3)     | 9(3)     |
| C11  | 11(4)    | 25(4)    | 11(4)    | -2(4)    | 8(3)     | 5(4)     |
| C12  | 20(3)    | 9(3)     | 16(4)    | 5(3)     | -6(3)    | -5(4)    |
| C13  | 16(4)    | 14(4)    | 23(4)    | -5(3)    | -8(3)    | 4(3)     |
| C14  | 22(4)    | 21(4)    | 14(5)    | -2(3)    | 2(3)     | -2(4)    |
| C15  | 24(4)    | 23(4)    | 27(5)    | -7(4)    | -5(3)    | -1(4)    |
| C16  | 14(4)    | 14(3)    | 16(4)    | 2(3)     | 1(3)     | 2(3)     |
| C17  | 24(4)    | 24(4)    | 15(4)    | 7(3)     | 9(3)     | -5(4)    |
| C18  | 18(4)    | 24(4)    | 32(5)    | 8(3)     | -8(4)    | 8(3)     |
| C19  | 28(4)    | 31(4)    | 10(4)    | 4(3)     | -1(4)    | 0(4)     |
| C20  | 14(4)    | 11(4)    | 19(4)    | -3(3)    | -3(3)    | 1(3)     |
| C21  | 14(4)    | 9(3)     | 16(4)    | 4(3)     | 1(3)     | -2(3)    |
| C22  | 17(4)    | 13(4)    | 18(4)    | -1(3)    | -3(3)    | -2(3)    |
| C23  | 30(5)    | 37(5)    | 12(5)    | 1(4)     | -6(4)    | 0(4)     |
| C24  | 20(4)    | 22(4)    | 19(4)    | 0(3)     | -1(3)    | -1(3)    |
| C25  | 16(4)    | 23(4)    | 15(4)    | 6(3)     | 0(3)     | 2(3)     |
| C26  | 13(4)    | 23(4)    | 7(4)     | 0(3)     | -7(3)    | -1(3)    |
| C27  | 21(4)    | 14(4)    | 18(4)    | -1(3)    | 4(3)     | -11(3)   |

|     |       |       |       |           |          |        |
|-----|-------|-------|-------|-----------|----------|--------|
| C28 | 45(5) | 25(4) | 10(4) | 1(4)      | -2(3)    | 12(4)  |
| C29 | 18(4) | 26(4) | 18(4) | 3(3)      | 8(3)     | 0(3)   |
| C30 | 26(4) | 25(4) | 39(5) | -2(4)     | 1(4)     | 4(4)   |
| F1  | 40(3) | 42(3) | 13(2) | -17.3(19) | 1(2)     | 5(2)   |
| F2  | 29(2) | 35(2) | 22(3) | -6.1(19)  | -3.1(19) | -16(2) |
| F3  | 32(2) | 32(2) | 19(2) | 5(2)      | -4(2)    | -2(2)  |
| F4  | 62(3) | 32(2) | 28(3) | -7(2)     | 5(3)     | 17(3)  |
| F5  | 47(3) | 60(3) | 12(2) | 2(2)      | -8(2)    | 17(2)  |
| F6  | 38(3) | 58(3) | 22(3) | 7(2)      | 8(2)     | -9(3)  |
| N5  | 44(5) | 57(5) | 68(6) | 16(4)     | -8(4)    | 11(4)  |
| C31 | 42(5) | 34(5) | 50(6) | -3(4)     | 6(4)     | 0(4)   |
| C32 | 68(7) | 39(5) | 33(5) | 15(4)     | 9(4)     | 8(5)   |

**Table 4 Bond Lengths for complex\_6b.**

| Atom | Atom | Length/Å | Atom | Atom | Length/Å  |
|------|------|----------|------|------|-----------|
| Pd1  | O1   | 2.042(4) | C3   | C4   | 1.367(9)  |
| Pd1  | O4   | 2.121(4) | C4   | C5   | 1.390(9)  |
| Pd1  | N1   | 2.060(5) | C5   | C6   | 1.413(8)  |
| Pd1  | C1   | 1.961(6) | C5   | C8   | 1.479(9)  |
| Pd2  | O2   | 2.134(4) | C6   | C7   | 1.501(8)  |
| Pd2  | O5   | 2.034(4) | C8   | F1   | 1.337(7)  |
| Pd2  | N3   | 2.056(5) | C8   | F2   | 1.350(7)  |
| Pd2  | C16  | 1.951(6) | C8   | F3   | 1.349(8)  |
| O1   | C11  | 1.246(8) | C11  | C12  | 1.533(8)  |
| O2   | C11  | 1.263(8) | C12  | C13  | 1.520(8)  |
| O3   | C14  | 1.219(8) | C14  | C15  | 1.497(9)  |
| O4   | C26  | 1.251(8) | C16  | C17  | 1.389(9)  |
| O5   | C26  | 1.260(7) | C16  | C21  | 1.385(9)  |
| O6   | C29  | 1.211(8) | C17  | C18  | 1.398(9)  |
| N1   | C7   | 1.487(8) | C18  | C19  | 1.372(9)  |
| N1   | C9   | 1.472(7) | C19  | C20  | 1.372(9)  |
| N1   | C10  | 1.462(8) | C20  | C21  | 1.413(8)  |
| N2   | C12  | 1.463(8) | C20  | C23  | 1.485(9)  |
| N2   | C14  | 1.335(8) | C21  | C22  | 1.501(8)  |
| N3   | C22  | 1.479(8) | C23  | F4   | 1.343(8)  |
| N3   | C24  | 1.479(8) | C23  | F5   | 1.333(7)  |
| N3   | C25  | 1.490(7) | C23  | F6   | 1.350(8)  |
| N4   | C27  | 1.440(8) | C26  | C27  | 1.535(8)  |
| N4   | C29  | 1.342(8) | C27  | C28  | 1.510(9)  |
| C1   | C2   | 1.398(9) | C29  | C30  | 1.517(9)  |
| C1   | C6   | 1.401(8) | N5   | C31  | 1.120(10) |
| C2   | C3   | 1.378(9) | C31  | C32  | 1.493(11) |

**Table 5 Bond Angles for complex\_6b.**

| Atom | Atom | Atom | Angle/°    | Atom | Atom | Atom | Angle/°  |
|------|------|------|------------|------|------|------|----------|
| O1   | Pd1  | O4   | 90.04(16)  | F1   | C8   | F2   | 105.9(5) |
| O1   | Pd1  | N1   | 170.72(19) | F1   | C8   | F3   | 106.2(5) |
| N1   | Pd1  | O4   | 94.41(18)  | F2   | C8   | C5   | 112.3(5) |
| C1   | Pd1  | O1   | 92.6(2)    | F3   | C8   | C5   | 113.0(6) |
| C1   | Pd1  | O4   | 176.7(2)   | F3   | C8   | F2   | 104.9(5) |
| C1   | Pd1  | N1   | 82.7(2)    | O1   | C11  | O2   | 128.3(6) |
| O5   | Pd2  | O2   | 87.66(16)  | O1   | C11  | C12  | 115.1(6) |
| O5   | Pd2  | N3   | 170.3(2)   | O2   | C11  | C12  | 116.4(6) |
| N3   | Pd2  | O2   | 96.80(18)  | N2   | C12  | C11  | 109.1(5) |
| C16  | Pd2  | O2   | 177.6(2)   | N2   | C12  | C13  | 112.6(5) |
| C16  | Pd2  | O5   | 93.7(2)    | C13  | C12  | C11  | 108.5(5) |
| C16  | Pd2  | N3   | 81.6(2)    | O3   | C14  | N2   | 122.2(6) |
| C11  | O1   | Pd1  | 123.4(4)   | O3   | C14  | C15  | 121.4(6) |
| C11  | O2   | Pd2  | 126.2(4)   | N2   | C14  | C15  | 116.4(6) |
| C26  | O4   | Pd1  | 125.5(4)   | C17  | C16  | Pd2  | 125.9(5) |
| C26  | O5   | Pd2  | 124.6(4)   | C21  | C16  | Pd2  | 114.9(5) |
| C7   | N1   | Pd1  | 106.8(4)   | C21  | C16  | C17  | 119.2(6) |
| C9   | N1   | Pd1  | 107.2(4)   | C16  | C17  | C18  | 120.3(6) |
| C9   | N1   | C7   | 108.9(5)   | C19  | C18  | C17  | 120.1(6) |
| C10  | N1   | Pd1  | 115.1(4)   | C20  | C19  | C18  | 120.6(6) |
| C10  | N1   | C7   | 109.8(5)   | C19  | C20  | C21  | 119.6(6) |
| C10  | N1   | C9   | 108.9(5)   | C19  | C20  | C23  | 119.9(6) |
| C14  | N2   | C12  | 122.7(6)   | C21  | C20  | C23  | 120.5(6) |
| C22  | N3   | Pd2  | 107.3(4)   | C16  | C21  | C20  | 120.2(6) |
| C22  | N3   | C25  | 110.0(5)   | C16  | C21  | C22  | 114.9(5) |
| C24  | N3   | Pd2  | 107.3(4)   | C20  | C21  | C22  | 124.9(6) |
| C24  | N3   | C22  | 109.5(5)   | N3   | C22  | C21  | 108.1(5) |
| C24  | N3   | C25  | 107.4(5)   | F4   | C23  | C20  | 112.6(6) |
| C25  | N3   | Pd2  | 115.1(4)   | F4   | C23  | F6   | 105.9(6) |
| C29  | N4   | C27  | 121.0(6)   | F5   | C23  | C20  | 113.1(6) |
| C2   | C1   | Pd1  | 126.8(5)   | F5   | C23  | F4   | 106.6(6) |
| C2   | C1   | C6   | 119.4(6)   | F5   | C23  | F6   | 105.7(6) |
| C6   | C1   | Pd1  | 113.8(4)   | F6   | C23  | C20  | 112.4(6) |
| C3   | C2   | C1   | 119.5(6)   | O4   | C26  | O5   | 128.3(6) |
| C4   | C3   | C2   | 121.9(6)   | O4   | C26  | C27  | 115.5(6) |
| C3   | C4   | C5   | 120.2(6)   | O5   | C26  | C27  | 116.1(6) |
| C4   | C5   | C6   | 119.0(6)   | N4   | C27  | C26  | 112.3(5) |
| C4   | C5   | C8   | 121.2(6)   | N4   | C27  | C28  | 110.8(5) |
| C6   | C5   | C8   | 119.8(6)   | C28  | C27  | C26  | 108.5(5) |
| C1   | C6   | C5   | 120.1(5)   | O6   | C29  | N4   | 122.7(6) |

|    |    |    |          |    |     |     |           |
|----|----|----|----------|----|-----|-----|-----------|
| C1 | C6 | C7 | 115.3(5) | O6 | C29 | C30 | 122.2(6)  |
| C5 | C6 | C7 | 124.6(6) | N4 | C29 | C30 | 115.1(6)  |
| N1 | C7 | C6 | 108.8(5) | N5 | C31 | C32 | 177.6(10) |



## Complex\_6a

molecular structure complex\_6a with 40% ellipsoids

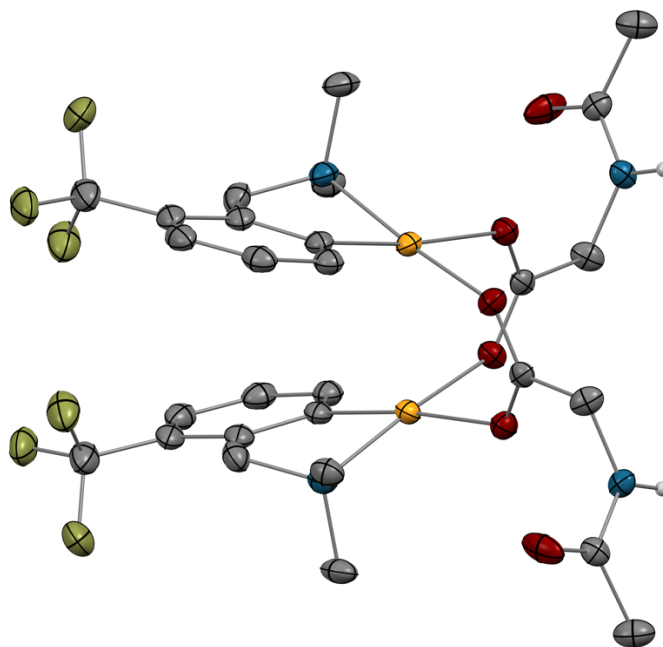

asymmetric unit complex\_6a with 40% ellipsoids

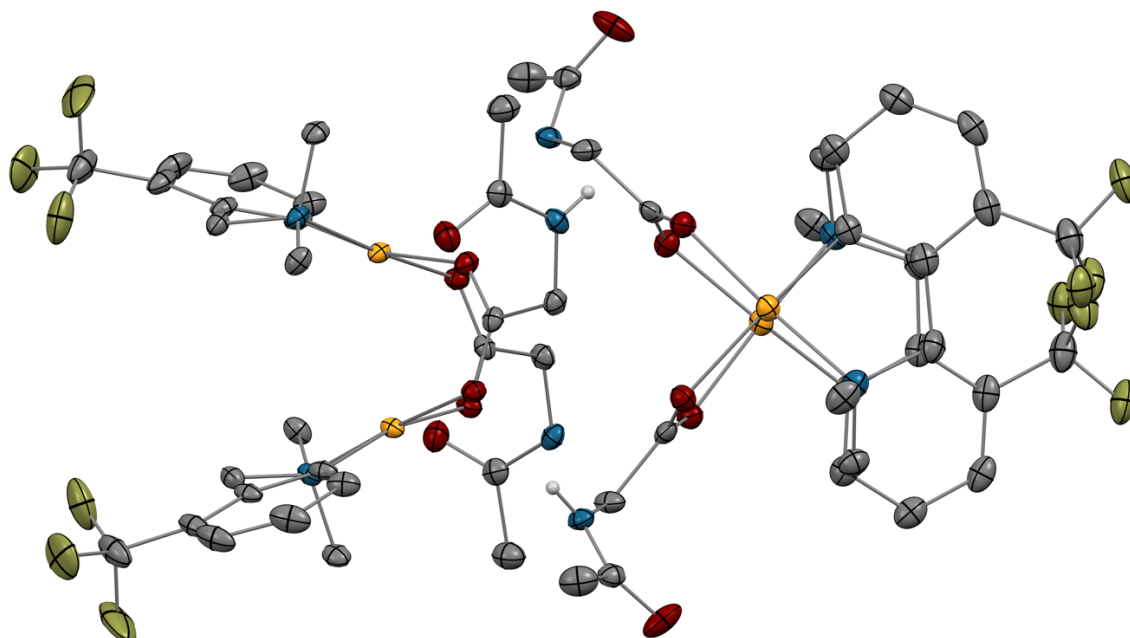

unit cell complex\_6a with hydrogen bonding

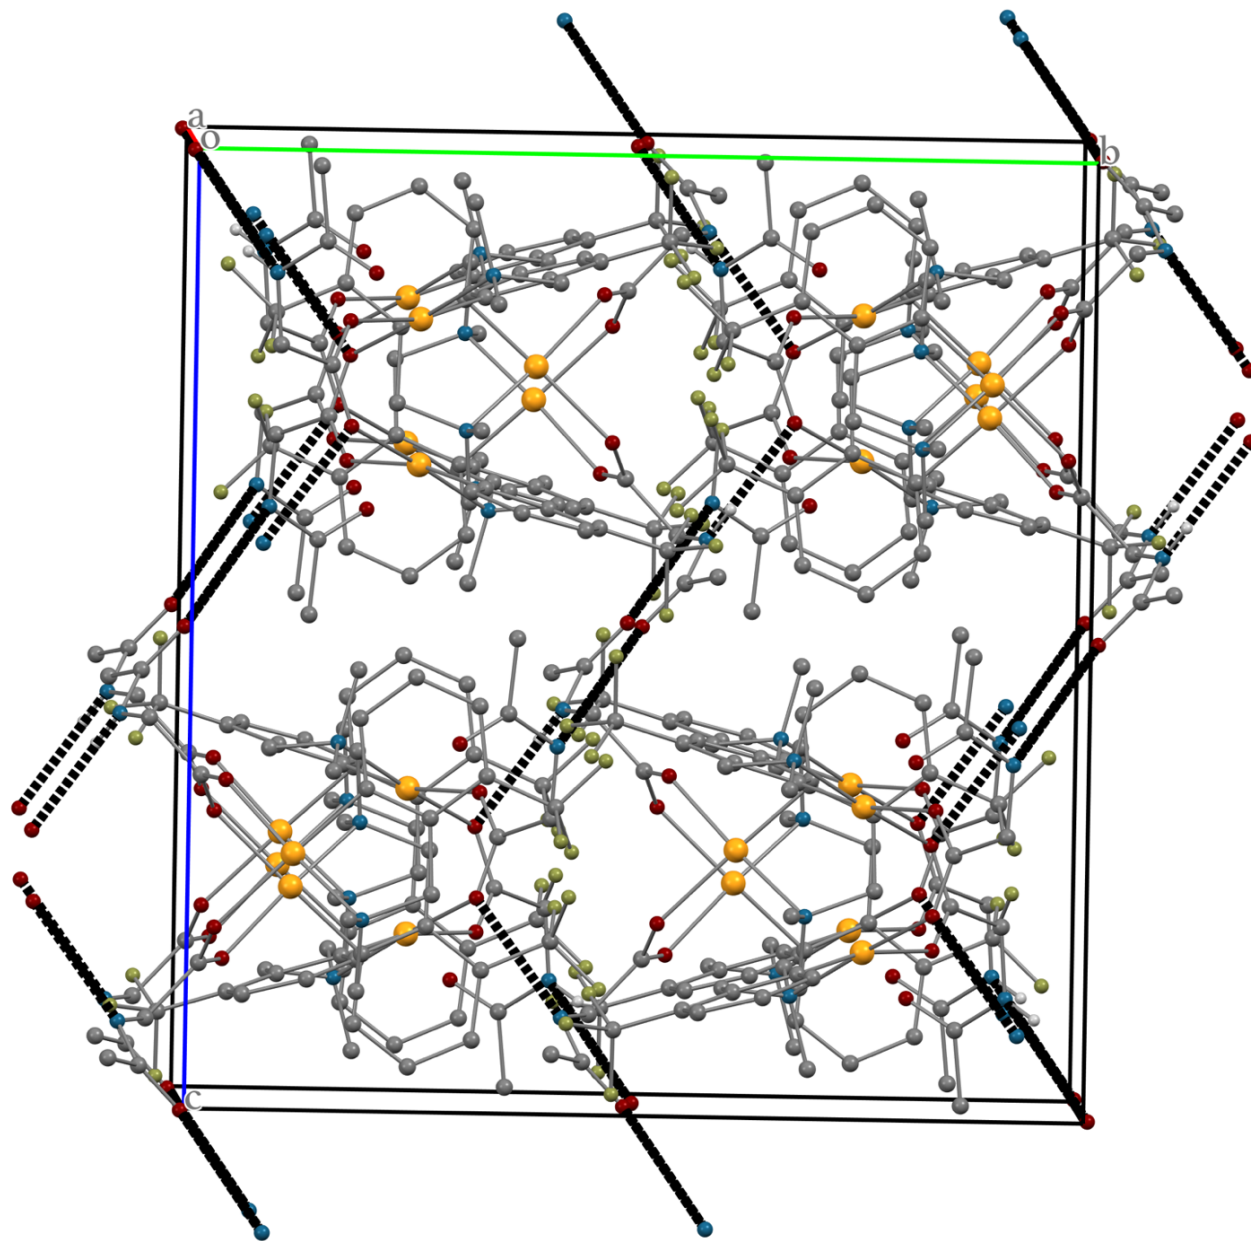

**Table 1 Crystal data and structure refinement for complex\_6a.**

|                                             |                                                                                              |
|---------------------------------------------|----------------------------------------------------------------------------------------------|
| Identification code                         | complex_6a                                                                                   |
| Empirical formula                           | C <sub>28</sub> H <sub>34</sub> F <sub>6</sub> N <sub>4</sub> O <sub>6</sub> Pd <sub>2</sub> |
| Formula weight                              | 849.39                                                                                       |
| Temperature/K                               | 100(2)                                                                                       |
| Crystal system                              | monoclinic                                                                                   |
| Space group                                 | C2/c                                                                                         |
| a/Å                                         | 19.2283(14)                                                                                  |
| b/Å                                         | 17.6933(14)                                                                                  |
| c/Å                                         | 18.9065(15)                                                                                  |
| α/°                                         | 90                                                                                           |
| β/°                                         | 93.545(3)                                                                                    |
| γ/°                                         | 90                                                                                           |
| Volume/Å <sup>3</sup>                       | 6419.9(9)                                                                                    |
| Z                                           | 8                                                                                            |
| ρ <sub>calc</sub> /g/cm <sup>3</sup>        | 1.758                                                                                        |
| μ/mm <sup>-1</sup>                          | 1.202                                                                                        |
| F(000)                                      | 3392.0                                                                                       |
| Crystal size/mm <sup>3</sup>                | 0.17 × 0.15 × 0.11                                                                           |
| Radiation                                   | MoKα (λ = 0.71073)                                                                           |
| 2θ range for data collection/°              | 4.244 to 53.616                                                                              |
| Index ranges                                | -24 ≤ h ≤ 24, -22 ≤ k ≤ 22, -23 ≤ l ≤ 23                                                     |
| Reflections collected                       | 86726                                                                                        |
| Independent reflections                     | 6867 [R <sub>int</sub> = 0.0293, R <sub>sigma</sub> = 0.0133]                                |
| Data/restraints/parameters                  | 6867/0/429                                                                                   |
| Goodness-of-fit on F <sup>2</sup>           | 1.073                                                                                        |
| Final R indexes [I ≥ 2σ (I)]                | R <sub>1</sub> = 0.0213, wR <sub>2</sub> = 0.0497                                            |
| Final R indexes [all data]                  | R <sub>1</sub> = 0.0265, wR <sub>2</sub> = 0.0522                                            |
| Largest diff. peak/hole / e Å <sup>-3</sup> | 0.81/-0.46                                                                                   |

$$R_{\text{int}} = \frac{\sum |F_o^2 - \langle F_o^2 \rangle|}{\sum |F_o^2|}$$

$$R_1 = \frac{\sum ||F_o| - |F_c||}{\sum |F_o|}$$

$$wR_2 = \left[ \frac{\sum [w(F_o^2 - F_c^2)^2]}{\sum [w(F_o^2)^2]} \right]^{1/2}$$

$$\text{Goodness-of-fit} = \left[ \frac{\sum [w(F_o^2 - F_c^2)^2]}{(n-p)} \right]^{1/2}$$

n: number of independent reflections; p: number of refined parameters

**Table 2 Fractional Atomic Coordinates ( $\times 10^4$ ) and Equivalent Isotropic Displacement Parameters ( $\text{\AA}^2 \times 10^3$ ) for complex\_6a.  $U_{eq}$  is defined as 1/3 of of the trace of the orthogonalised  $U_{ij}$  tensor.**

| Atom | x          | y          | z          | U(eq)    |
|------|------------|------------|------------|----------|
| Pd1  | 5239.9(2)  | 2507.3(2)  | 6747.3(2)  | 17.22(4) |
| F1   | 6424.3(8)  | -789.6(9)  | 5981.5(10) | 59.8(5)  |
| F2   | 5693.0(14) | -264.4(10) | 5236.0(9)  | 93.5(8)  |
| F9   | 5409.9(8)  | -525.2(8)  | 6273.7(10) | 59.5(5)  |
| O1   | 5972.6(7)  | 3273.2(7)  | 7150.3(7)  | 21.1(3)  |
| O2   | 5591.6(7)  | 3296.7(8)  | 8241.1(7)  | 22.7(3)  |
| O3   | 7297.0(8)  | 3043.5(8)  | 8780.8(8)  | 33.5(3)  |
| N1   | 4592.4(8)  | 1716.3(9)  | 6266.3(8)  | 19.2(3)  |
| N2   | 6707.7(9)  | 4134.3(10) | 8757.2(9)  | 22.5(3)  |
| C1   | 5960.4(10) | 1782.0(11) | 6524.7(9)  | 21.2(4)  |
| C2   | 6669.4(10) | 1936.8(13) | 6507.1(11) | 27.9(4)  |
| C3   | 7124.9(11) | 1381.7(15) | 6303.1(12) | 36.9(5)  |
| C4   | 6884.8(12) | 667.5(15)  | 6130.4(12) | 37.1(6)  |
| C5   | 6181.8(11) | 506.1(13)  | 6139.4(10) | 29.3(5)  |
| C6   | 5710.5(10) | 1065.5(11) | 6323(1)    | 22.0(4)  |
| C7   | 4938.4(10) | 959.8(11)  | 6342(1)    | 22.4(4)  |
| C8   | 5932.9(14) | -258.5(14) | 5914.5(13) | 42.0(6)  |
| C9   | 4502.7(10) | 1931.5(12) | 5505.9(10) | 25.2(4)  |
| C10  | 3890.8(10) | 1660.7(12) | 6549.7(11) | 24.9(4)  |
| C11  | 5993.7(9)  | 3499.4(10) | 7789.6(10) | 19.5(4)  |
| C12  | 6555.5(10) | 4078.0(11) | 8003(1)    | 23.3(4)  |
| C13  | 7076.5(10) | 3583.5(12) | 9099.1(11) | 24.7(4)  |
| C14  | 7215.5(13) | 3666.5(14) | 9887.1(12) | 35.9(5)  |
| Pd2  | 4242.6(2)  | 6154.7(2)  | 7310.7(2)  | 23.06(5) |
| F4   | 4217.8(8)  | 9251.3(8)  | 7247.9(9)  | 51.3(4)  |
| F6   | 3666.4(7)  | 9608.5(8)  | 6280.8(9)  | 48.1(4)  |
| F8   | 3109.9(7)  | 9114.0(8)  | 7113.7(9)  | 47.8(4)  |
| O4   | 4528.3(7)  | 5402.1(8)  | 6557.3(7)  | 26.8(3)  |
| O5   | 5661.6(7)  | 5292.4(8)  | 6907.5(7)  | 26.9(3)  |
| O6   | 6197.6(8)  | 4936(1)    | 5008.7(9)  | 43.1(4)  |
| N3   | 3833.1(8)  | 6923.6(10) | 7982.1(9)  | 27.0(4)  |
| N4   | 5885.9(9)  | 4232(1)    | 5919.0(9)  | 23.8(4)  |
| C15  | 4050.6(10) | 6960.0(12) | 6619.2(11) | 25.8(4)  |
| C16  | 4020.9(10) | 6875.9(13) | 5885.6(11) | 28.8(4)  |
| C17  | 3882.3(11) | 7493.3(13) | 5445.9(13) | 33.4(5)  |
| C18  | 3779.7(11) | 8201.5(13) | 5733.7(13) | 33.9(5)  |
| C19  | 3802.2(11) | 8292.5(12) | 6463.2(13) | 32.3(5)  |
| C20  | 3925.9(10) | 7670.1(12) | 6912.0(12) | 28.5(4)  |

|     |            |            |            |         |
|-----|------------|------------|------------|---------|
| C21 | 3964.0(12) | 7698.6(12) | 7707.9(12) | 31.9(5) |
| C22 | 3700.6(12) | 9060.5(14) | 6773.7(15) | 40.9(6) |
| C23 | 4104.1(11) | 6878.3(13) | 8729.6(11) | 32.2(5) |
| C24 | 3069.8(11) | 6767.9(15) | 7963.2(13) | 37.1(5) |
| C25 | 5132.2(10) | 5132.8(11) | 6523.6(10) | 22.5(4) |
| C26 | 5198.4(11) | 4550.2(13) | 5940.1(10) | 27.4(4) |
| C27 | 6343.9(10) | 4468.7(12) | 5470.9(10) | 25.6(4) |
| C28 | 7055.9(12) | 4115.6(16) | 5559.3(13) | 39.0(5) |

**Table 3 Anisotropic Displacement Parameters ( $\text{\AA}^2 \times 10^3$ ) for complex\_6a. The Anisotropic displacement factor exponent takes the form:  $-2\pi^2[h^2a^{*2}U_{11}+2hka^*b^*U_{12}+\dots]$ .**

| Atom | $U_{11}$ | $U_{22}$ | $U_{33}$  | $U_{23}$  | $U_{13}$  | $U_{12}$ |
|------|----------|----------|-----------|-----------|-----------|----------|
| Pd1  | 15.42(7) | 20.27(8) | 15.64(7)  | -2.50(5)  | -1.66(5)  | 3.77(5)  |
| F1   | 54.7(10) | 40.5(9)  | 84.1(12)  | -9.8(8)   | 3.5(9)    | 31.3(7)  |
| F2   | 179(2)   | 47.1(10) | 47.4(10)  | -26.3(8)  | -52.3(12) | 22.8(12) |
| F9   | 44.7(9)  | 30.9(8)  | 101.8(14) | -19.9(8)  | -4.5(9)   | 7.2(7)   |
| O1   | 21.1(7)  | 23.3(7)  | 18.8(6)   | 0.2(5)    | -0.8(5)   | -0.7(5)  |
| O2   | 22.7(7)  | 24.7(7)  | 20.3(7)   | 1.7(5)    | -0.8(5)   | -8.3(6)  |
| O3   | 36.8(9)  | 25.5(8)  | 37.8(9)   | -4.2(7)   | -0.9(7)   | 2.9(7)   |
| N1   | 17.3(7)  | 22.1(8)  | 17.7(7)   | -4.2(6)   | -1.9(6)   | 5.3(6)   |
| N2   | 19.9(8)  | 22.1(8)  | 25.7(9)   | -6.2(7)   | 1.1(7)    | -3.5(7)  |
| C1   | 18.9(9)  | 30.6(10) | 14.0(8)   | -1.8(7)   | -1.4(7)   | 7.5(8)   |
| C2   | 19.0(9)  | 41.6(12) | 22.7(10)  | -1.7(9)   | -1.3(8)   | 4.3(9)   |
| C3   | 18.8(10) | 61.2(16) | 30.4(11)  | -8.2(11)  | -1.4(9)   | 10.3(10) |
| C4   | 27.8(11) | 54.9(15) | 28.0(11)  | -12.2(10) | -3.2(9)   | 23.0(11) |
| C5   | 32.0(11) | 36.1(12) | 18.8(9)   | -7.3(8)   | -5.5(8)   | 14.9(9)  |
| C6   | 22.6(9)  | 29.4(10) | 13.6(8)   | -3.3(7)   | -3.4(7)   | 8.5(8)   |
| C7   | 24.5(10) | 21.7(9)  | 20.5(9)   | -4.2(7)   | -2.8(7)   | 5.3(8)   |
| C8   | 48.0(15) | 37.8(13) | 38.5(13)  | -13.6(11) | -12.8(11) | 22.4(12) |
| C9   | 25.9(10) | 29.7(10) | 19.1(9)   | -2.6(8)   | -6.0(8)   | 5.1(8)   |
| C10  | 17.2(9)  | 28(1)    | 29.4(10)  | -7.7(8)   | 1.8(8)    | 0.5(8)   |
| C11  | 17.4(9)  | 17.9(9)  | 22.6(9)   | 2.9(7)    | -3.4(7)   | -0.2(7)  |
| C12  | 22.5(10) | 21.7(9)  | 25.8(10)  | 1.8(8)    | 1.3(8)    | -5.3(8)  |
| C13  | 19.9(9)  | 26.5(10) | 27.6(10)  | -1.4(8)   | 1.7(8)    | -8.5(8)  |
| C14  | 37.8(13) | 42.4(13) | 27.2(11)  | 1.8(10)   | 0.1(9)    | -4.7(10) |
| Pd2  | 19.21(8) | 23.31(8) | 26.87(8)  | 1.52(6)   | 2.96(6)   | 3.03(6)  |
| F4   | 44.3(8)  | 36.2(8)  | 70.5(11)  | -4.7(7)   | -19.9(8)  | 0.5(6)   |
| F6   | 43.4(8)  | 27.2(7)  | 72.5(10)  | 14.0(7)   | -6.9(7)   | 1.0(6)   |
| F8   | 40.5(8)  | 33.6(7)  | 69.7(10)  | 0.3(7)    | 6.0(7)    | 11.0(6)  |
| O4   | 27.1(7)  | 27.3(7)  | 26.2(7)   | 1.1(6)    | 3.1(6)    | 5.2(6)   |
| O5   | 26.2(7)  | 26.5(7)  | 28.1(7)   | -2.9(6)   | 3.2(6)    | 0.1(6)   |
| O6   | 30.9(8)  | 59.9(11) | 38.0(9)   | 27.9(8)   | -1.6(7)   | -8.6(8)  |
| N3   | 19.8(8)  | 29.9(9)  | 31.1(9)   | -2.8(7)   | 1.2(7)    | 2.9(7)   |
| N4   | 26.7(9)  | 27.3(9)  | 17.5(8)   | 4.6(7)    | 1.8(7)    | 5.1(7)   |
| C15  | 15.7(9)  | 27.2(10) | 34.2(11)  | 3.6(9)    | -0.2(8)   | 1.6(8)   |
| C16  | 20.4(10) | 31.6(11) | 34.3(11)  | 3.4(9)    | 1.1(8)    | -0.2(8)  |
| C17  | 22.6(10) | 41.9(13) | 35.2(12)  | 8.7(10)   | -1.9(9)   | -2.1(9)  |
| C18  | 21.4(10) | 33.7(12) | 46.2(13)  | 13.3(10)  | -2.5(9)   | 1.1(9)   |
| C19  | 18.7(10) | 27.8(11) | 49.9(14)  | 5.1(10)   | -3.3(9)   | 2.5(8)   |
| C20  | 16.8(9)  | 29.3(11) | 38.8(12)  | 2.4(9)    | -3.2(8)   | 1.4(8)   |
| C21  | 29.0(11) | 25.9(11) | 39.9(12)  | -2.8(9)   | -4.4(9)   | 5.7(9)   |

|     |          |          |          |           |          |         |
|-----|----------|----------|----------|-----------|----------|---------|
| C22 | 31.3(12) | 30.2(12) | 59.8(16) | 7.0(11)   | -7.4(11) | 2(1)    |
| C23 | 29.3(11) | 37.7(12) | 29.8(11) | -3.8(9)   | 3.4(9)   | 3.1(9)  |
| C24 | 19.8(10) | 47.9(14) | 43.9(13) | -11.1(11) | 4.9(9)   | 2.1(10) |
| C25 | 25.2(10) | 22.5(10) | 20.5(9)  | 7.1(8)    | 5.8(8)   | 1.0(8)  |
| C26 | 28.1(10) | 36.9(12) | 17.1(9)  | 0.4(8)    | 1.4(8)   | 5.9(9)  |
| C27 | 26.4(10) | 29.3(11) | 20.7(9)  | -1.9(8)   | -1.0(8)  | -3.9(8) |
| C28 | 25.6(11) | 57.0(15) | 34.6(12) | 1.6(11)   | 2.6(9)   | 3.0(11) |

**Table 4 Bond Lengths for complex\_6a.**

| Atom | Atom            | Length/Å   | Atom | Atom            | Length/Å   |
|------|-----------------|------------|------|-----------------|------------|
| Pd1  | O1              | 2.0661(13) | Pd2  | O4              | 2.0497(14) |
| Pd1  | O2 <sup>1</sup> | 2.1239(13) | Pd2  | O5 <sup>1</sup> | 2.1244(14) |
| Pd1  | N1              | 2.0485(16) | Pd2  | N3              | 2.0506(17) |
| Pd1  | C1              | 1.9534(18) | Pd2  | C15             | 1.954(2)   |
| F1   | C8              | 1.333(3)   | F4   | C22             | 1.340(3)   |
| F2   | C8              | 1.336(3)   | F6   | C22             | 1.344(3)   |
| F9   | C8              | 1.334(3)   | F8   | C22             | 1.342(3)   |
| O1   | C11             | 1.272(2)   | O4   | C25             | 1.260(2)   |
| O2   | C11             | 1.240(2)   | O5   | C25             | 1.245(2)   |
| O3   | C13             | 1.219(3)   | O6   | C27             | 1.223(3)   |
| N1   | C7              | 1.498(2)   | N3   | C21             | 1.493(3)   |
| N1   | C9              | 1.487(2)   | N3   | C23             | 1.478(3)   |
| N1   | C10             | 1.485(2)   | N3   | C24             | 1.491(3)   |
| N2   | C12             | 1.441(3)   | N4   | C26             | 1.440(3)   |
| N2   | C13             | 1.347(3)   | N4   | C27             | 1.327(3)   |
| C1   | C2              | 1.393(3)   | C15  | C16             | 1.393(3)   |
| C1   | C6              | 1.400(3)   | C15  | C20             | 1.399(3)   |
| C2   | C3              | 1.386(3)   | C16  | C17             | 1.388(3)   |
| C3   | C4              | 1.378(4)   | C17  | C18             | 1.385(3)   |
| C4   | C5              | 1.383(3)   | C18  | C19             | 1.387(3)   |
| C5   | C6              | 1.400(3)   | C19  | C20             | 1.402(3)   |
| C5   | C8              | 1.488(3)   | C19  | C22             | 1.498(3)   |
| C6   | C7              | 1.499(3)   | C20  | C21             | 1.503(3)   |
| C11  | C12             | 1.524(3)   | C25  | C26             | 1.521(3)   |
| C13  | C14             | 1.504(3)   | C27  | C28             | 1.505(3)   |

<sup>1</sup>1-X,+Y,3/2-Z



**Table 5 Bond Angles for complex\_6a.**

| Atom | Atom | Atom             | Angle/°    | Atom | Atom | Atom             | Angle/°    |
|------|------|------------------|------------|------|------|------------------|------------|
| O1   | Pd1  | O2 <sup>1</sup>  | 93.52(5)   | O4   | Pd2  | O5 <sup>1</sup>  | 90.09(6)   |
| N1   | Pd1  | O1               | 173.57(6)  | O4   | Pd2  | N3               | 172.24(6)  |
| N1   | Pd1  | O2 <sup>1</sup>  | 90.95(6)   | N3   | Pd2  | O5 <sup>1</sup>  | 93.78(6)   |
| C1   | Pd1  | O1               | 91.93(7)   | C15  | Pd2  | O4               | 93.23(7)   |
| C1   | Pd1  | O2 <sup>1</sup>  | 168.11(6)  | C15  | Pd2  | O5 <sup>1</sup>  | 173.83(7)  |
| C1   | Pd1  | N1               | 82.83(7)   | C15  | Pd2  | N3               | 82.33(8)   |
| C11  | O1   | Pd1              | 122.55(12) | C25  | O4   | Pd2              | 124.62(13) |
| C11  | O2   | Pd1 <sup>1</sup> | 134.37(12) | C25  | O5   | Pd2 <sup>1</sup> | 126.94(13) |
| C7   | N1   | Pd1              | 108.30(11) | C21  | N3   | Pd2              | 108.36(13) |
| C9   | N1   | Pd1              | 106.57(12) | C23  | N3   | Pd2              | 115.45(13) |
| C9   | N1   | C7               | 110.22(14) | C23  | N3   | C21              | 108.96(17) |
| C10  | N1   | Pd1              | 115.20(11) | C23  | N3   | C24              | 107.52(17) |
| C10  | N1   | C7               | 108.33(15) | C24  | N3   | Pd2              | 106.12(13) |
| C10  | N1   | C9               | 108.19(15) | C24  | N3   | C21              | 110.37(17) |
| C13  | N2   | C12              | 119.58(17) | C27  | N4   | C26              | 122.75(18) |
| C2   | C1   | Pd1              | 125.75(16) | C16  | C15  | Pd2              | 125.66(16) |
| C2   | C1   | C6               | 119.43(18) | C16  | C15  | C20              | 119.50(19) |
| C6   | C1   | Pd1              | 114.67(14) | C20  | C15  | Pd2              | 114.83(16) |
| C3   | C2   | C1               | 120.2(2)   | C17  | C16  | C15              | 120.4(2)   |
| C4   | C3   | C2               | 120.5(2)   | C18  | C17  | C16              | 120.2(2)   |
| C3   | C4   | C5               | 120.0(2)   | C17  | C18  | C19              | 119.9(2)   |
| C4   | C5   | C6               | 120.3(2)   | C18  | C19  | C20              | 120.3(2)   |
| C4   | C5   | C8               | 118.8(2)   | C18  | C19  | C22              | 119.9(2)   |
| C6   | C5   | C8               | 120.8(2)   | C20  | C19  | C22              | 119.8(2)   |
| C1   | C6   | C7               | 115.48(16) | C15  | C20  | C19              | 119.5(2)   |
| C5   | C6   | C1               | 119.41(19) | C15  | C20  | C21              | 115.29(19) |
| C5   | C6   | C7               | 125.09(19) | C19  | C20  | C21              | 125.1(2)   |
| N1   | C7   | C6               | 108.73(16) | N3   | C21  | C20              | 108.54(17) |
| F1   | C8   | F2               | 106.6(2)   | F4   | C22  | F6               | 106.54(19) |
| F1   | C8   | F9               | 104.7(2)   | F4   | C22  | F8               | 106.1(2)   |
| F1   | C8   | C5               | 113.6(2)   | F4   | C22  | C19              | 112.41(19) |
| F2   | C8   | C5               | 111.6(2)   | F6   | C22  | C19              | 112.6(2)   |
| F9   | C8   | F2               | 105.0(2)   | F8   | C22  | F6               | 105.95(18) |
| F9   | C8   | C5               | 114.54(19) | F8   | C22  | C19              | 112.7(2)   |
| O1   | C11  | C12              | 116.33(16) | O4   | C25  | C26              | 114.30(17) |
| O2   | C11  | O1               | 125.37(17) | O5   | C25  | O4               | 127.38(19) |
| O2   | C11  | C12              | 118.29(17) | O5   | C25  | C26              | 118.32(17) |
| N2   | C12  | C11              | 113.93(16) | N4   | C26  | C25              | 113.78(17) |
| O3   | C13  | N2               | 121.26(19) | O6   | C27  | N4               | 122.5(2)   |
| O3   | C13  | C14              | 121.3(2)   | O6   | C27  | C28              | 121.8(2)   |

N2 C13 C14 117.43(19) N4 C27 C28 115.67(19)

Complex\_S5.1

complex\_S5.1 with 50% ellipsoids

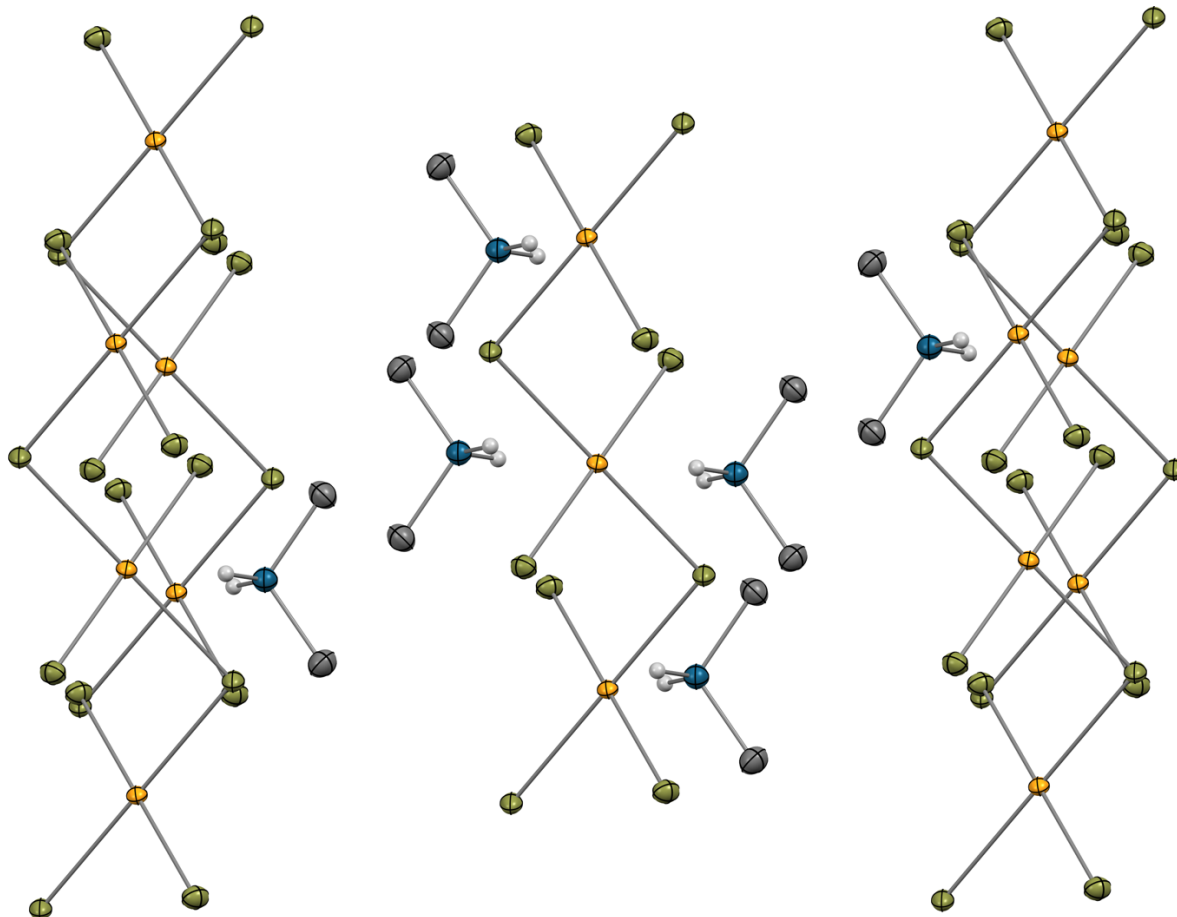

complex\_S5.1 with 50% ellipsoids and short contacts

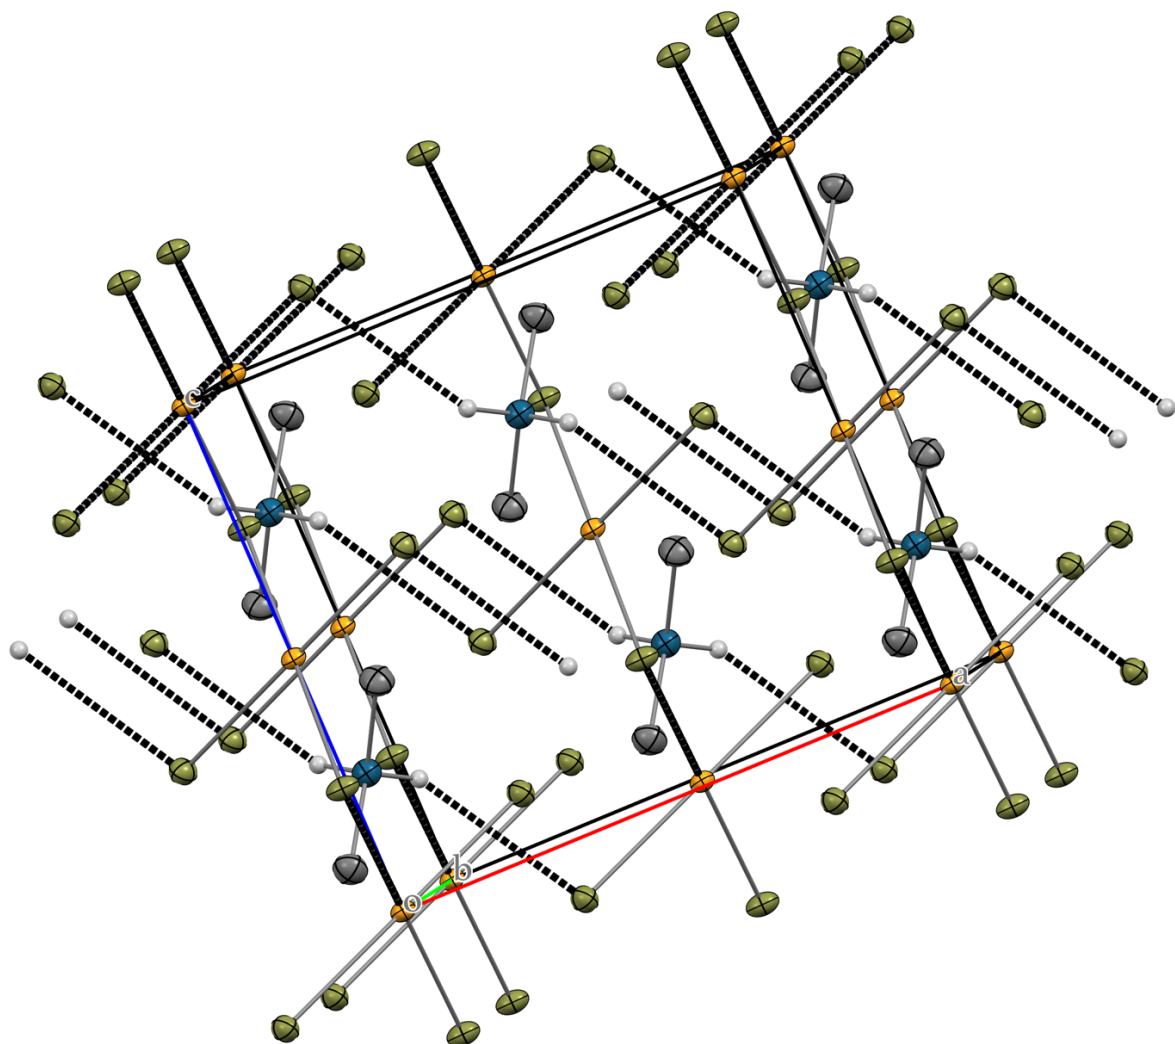

**Table 1 Crystal data and structure refinement for complex\_S5.1.**

|                                             |                                                                               |
|---------------------------------------------|-------------------------------------------------------------------------------|
| Identification code                         | complex_S5.1                                                                  |
| Empirical formula                           | C <sub>4</sub> H <sub>16</sub> Cl <sub>6</sub> N <sub>2</sub> Pd <sub>2</sub> |
| Formula weight                              | 517.69                                                                        |
| Temperature/K                               | 100(2)                                                                        |
| Crystal system                              | monoclinic                                                                    |
| Space group                                 | C2/c                                                                          |
| a/Å                                         | 7.6908(5)                                                                     |
| b/Å                                         | 13.0776(8)                                                                    |
| c/Å                                         | 7.1107(4)                                                                     |
| α/°                                         | 90                                                                            |
| β/°                                         | 90.8831(14)                                                                   |
| γ/°                                         | 90                                                                            |
| Volume/Å <sup>3</sup>                       | 715.09(8)                                                                     |
| Z                                           | 2                                                                             |
| ρ <sub>calc</sub> /g/cm <sup>3</sup>        | 2.404                                                                         |
| μ/mm <sup>-1</sup>                          | 3.603                                                                         |
| F(000)                                      | 496.0                                                                         |
| Crystal size/mm <sup>3</sup>                | 0.32 × 0.12 × 0.11                                                            |
| Radiation                                   | MoKα (λ = 0.71073)                                                            |
| 2θ range for data collection/°              | 6.146 to 67.494                                                               |
| Index ranges                                | -11 ≤ h ≤ 12, -20 ≤ k ≤ 20, -11 ≤ l ≤ 11                                      |
| Reflections collected                       | 17218                                                                         |
| Independent reflections                     | 1435 [R <sub>int</sub> = 0.0231, R <sub>sigma</sub> = 0.0103]                 |
| Data/restraints/parameters                  | 1435/0/40                                                                     |
| Goodness-of-fit on F <sup>2</sup>           | 1.137                                                                         |
| Final R indexes [I ≥ 2σ (I)]                | R <sub>1</sub> = 0.0115, wR <sub>2</sub> = 0.0247                             |
| Final R indexes [all data]                  | R <sub>1</sub> = 0.0137, wR <sub>2</sub> = 0.0253                             |
| Largest diff. peak/hole / e Å <sup>-3</sup> | 0.44/-0.53                                                                    |

$$R_{\text{int}} = \frac{\sum |F_o^2 - \langle F_o^2 \rangle|}{\sum |F_o^2|}$$

$$R_1 = \frac{\sum ||F_o| - |F_c||}{\sum |F_o|}$$

$$wR_2 = \left[ \frac{\sum [w(F_o^2 - F_c^2)^2]}{\sum [w(F_o^2)^2]} \right]^{1/2}$$

$$\text{Goodness-of-fit} = \left[ \frac{\sum [w(F_o^2 - F_c^2)^2]}{(n-p)} \right]^{1/2}$$

n: number of independent reflections; p: number of refined parameters

**Table 2 Fractional Atomic Coordinates ( $\times 10^4$ ) and Equivalent Isotropic Displacement Parameters ( $\text{\AA}^2 \times 10^3$ ) for complex\_S5.1.  $U_{eq}$  is defined as 1/3 of the trace of the orthogonalised  $U_{ij}$  tensor.**

| Atom | x           | y          | z          | $U_{eq}$  |
|------|-------------|------------|------------|-----------|
| Pd1  | 5000        | 5000       | 5000       | 8.92(3)   |
| Cl2  | 5000        | 6125.4(2)  | 7500       | 13.04(6)  |
| Cl1  | 7531.7(3)   | 4269.7(2)  | 6140.8(3)  | 13.99(5)  |
| N1   | 10000       | 3741.7(10) | 2500       | 13.7(2)   |
| C2   | 10836.2(14) | 3104.0(9)  | 3990.8(16) | 18.68(19) |

**Table 3 Anisotropic Displacement Parameters ( $\text{\AA}^2 \times 10^3$ ) for complex\_S5.1. The Anisotropic displacement factor exponent takes the form:  $-2\pi^2[h^2a^{*2}U_{11}+2hka^*b^*U_{12}+\dots]$ .**

| Atom | $U_{11}$  | $U_{22}$  | $U_{33}$ | $U_{23}$ | $U_{13}$ | $U_{12}$ |
|------|-----------|-----------|----------|----------|----------|----------|
| Pd1  | 10.95(4)  | 9.04(4)   | 6.78(4)  | 0.39(3)  | 0.67(3)  | -0.14(3) |
| Cl2  | 20.35(15) | 10.51(13) | 8.29(12) | 0        | 0.62(10) | 0        |
| Cl1  | 13.53(9)  | 15.53(10) | 12.86(9) | 0.15(8)  | -0.98(7) | 2.40(8)  |
| N1   | 14.9(5)   | 13.1(5)   | 13.2(5)  | 0        | 0.6(4)   | 0        |
| C2   | 20.1(5)   | 17.7(5)   | 18.2(5)  | 3.1(4)   | -1.2(4)  | 2.2(4)   |

**Table 4 Bond Lengths for complex\_S5.1.**

| Atom | Atom             | Length/ $\text{\AA}$ | Atom | Atom             | Length/ $\text{\AA}$ |
|------|------------------|----------------------|------|------------------|----------------------|
| Pd1  | Cl2              | 2.3079(2)            | Pd1  | Cl1 <sup>1</sup> | 2.3049(3)            |
| Pd1  | Cl2 <sup>1</sup> | 2.3079(2)            | N1   | C2               | 1.4872(13)           |
| Pd1  | Cl1              | 2.3049(3)            | N1   | C2 <sup>2</sup>  | 1.4872(13)           |

<sup>1</sup>1-X,1-Y,1-Z; <sup>2</sup>2-X,+Y,1/2-Z

**Table 5 Bond Angles for complex\_S5.1.**

| Atom             | Atom | Atom             | Angle/ $^\circ$ | Atom             | Atom | Atom             | Angle/ $^\circ$ |
|------------------|------|------------------|-----------------|------------------|------|------------------|-----------------|
| Cl2              | Pd1  | Cl2 <sup>1</sup> | 180.0           | Cl1 <sup>1</sup> | Pd1  | Cl2              | 89.818(7)       |
| Cl1 <sup>1</sup> | Pd1  | Cl2 <sup>1</sup> | 90.182(7)       | Cl1              | Pd1  | Cl1 <sup>1</sup> | 180.0           |
| Cl1              | Pd1  | Cl2              | 90.183(7)       | Pd1              | Cl2  | Pd1 <sup>2</sup> | 100.756(13)     |
| Cl1              | Pd1  | Cl2 <sup>1</sup> | 89.817(7)       | C2               | N1   | C2 <sup>3</sup>  | 111.79(12)      |

## Complex\_17

molecular structure complex\_17 with 40% ellipsoids

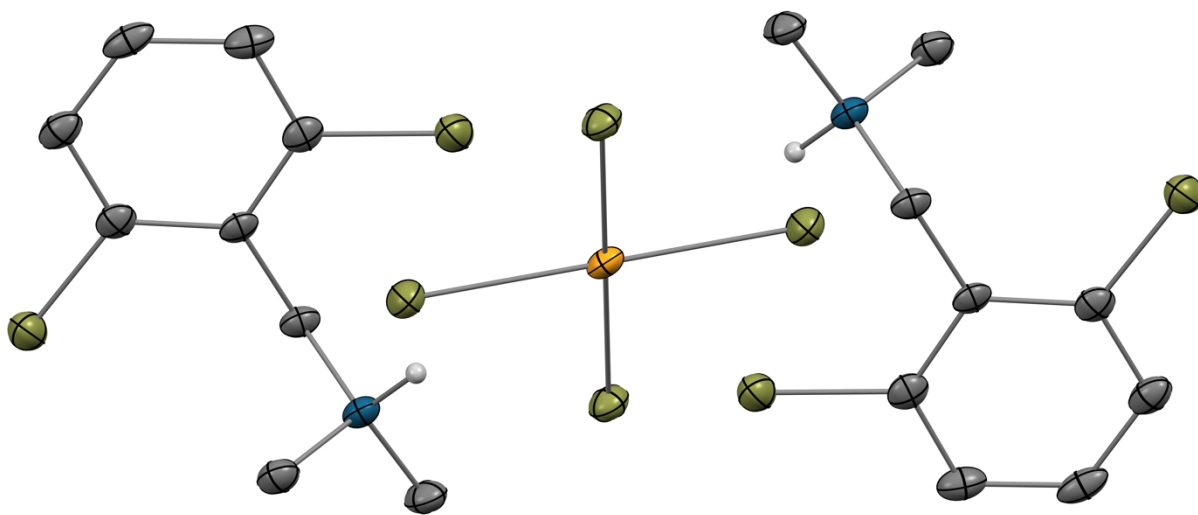

unit cell complex\_17 with 40% ellipsoids and short contacts

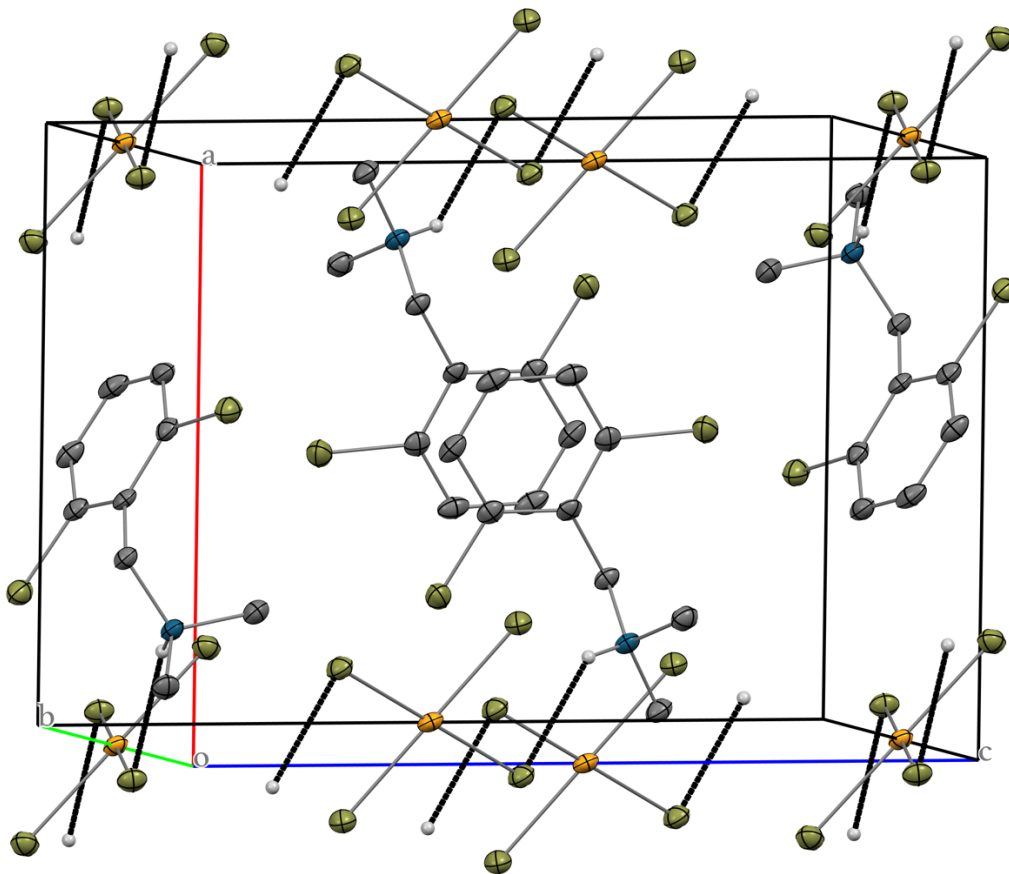

**Table 1 Crystal data and structure refinement for complex\_17.**

|                                             |                                                                   |
|---------------------------------------------|-------------------------------------------------------------------|
| Identification code                         | complex_17                                                        |
| Empirical formula                           | C <sub>18</sub> H <sub>24</sub> Cl <sub>8</sub> N <sub>2</sub> Pd |
| Formula weight                              | 658.39                                                            |
| Temperature/K                               | 100(2)                                                            |
| Crystal system                              | monoclinic                                                        |
| Space group                                 | P2 <sub>1</sub> /c                                                |
| a/Å                                         | 10.3725(10)                                                       |
| b/Å                                         | 8.0905(8)                                                         |
| c/Å                                         | 14.2505(13)                                                       |
| α/°                                         | 90                                                                |
| β/°                                         | 90.468(2)                                                         |
| γ/°                                         | 90                                                                |
| Volume/Å <sup>3</sup>                       | 1195.8(2)                                                         |
| Z                                           | 2                                                                 |
| ρ <sub>calc</sub> /g/cm <sup>3</sup>        | 1.828                                                             |
| μ/mm <sup>-1</sup>                          | 1.680                                                             |
| F(000)                                      | 656.0                                                             |
| Crystal size/mm <sup>3</sup>                | 0.22 × 0.09 × 0.06                                                |
| Radiation                                   | MoKα (λ = 0.71073)                                                |
| 2Θ range for data collection/°              | 5.718 to 52.862                                                   |
| Index ranges                                | -12 ≤ h ≤ 12, -9 ≤ k ≤ 10, -17 ≤ l ≤ 17                           |
| Reflections collected                       | 15065                                                             |
| Independent reflections                     | 2444 [R <sub>int</sub> = 0.0536, R <sub>sigma</sub> = 0.0425]     |
| Data/restraints/parameters                  | 2444/1/138                                                        |
| Goodness-of-fit on F <sup>2</sup>           | 1.096                                                             |
| Final R indexes [I >= 2σ (I)]               | R <sub>1</sub> = 0.0435, wR <sub>2</sub> = 0.1038                 |
| Final R indexes [all data]                  | R <sub>1</sub> = 0.0677, wR <sub>2</sub> = 0.1154                 |
| Largest diff. peak/hole / e Å <sup>-3</sup> | 1.82/-0.40                                                        |

$$R_{\text{int}} = \frac{\sum |F_o^2 - \langle F_o^2 \rangle|}{\sum |F_o^2|}$$

$$R_1 = \frac{\sum ||F_o| - |F_c||}{\sum |F_o|}$$

$$wR_2 = \left[ \frac{\sum [w(F_o^2 - F_c^2)^2]}{\sum [w(F_o^2)^2]} \right]^{1/2}$$

$$\text{Goodness-of-fit} = \left[ \frac{\sum [w(F_o^2 - F_c^2)^2]}{(n-p)} \right]^{1/2}$$

n: number of independent reflections; p: number of refined parameters



**Table 2 Fractional Atomic Coordinates (×104) and Equivalent Isotropic Displacement Parameters (Å<sup>2</sup>×103) for complex\_17. U<sub>eq</sub> is defined as 1/3 of the trace of the orthogonalised U<sub>ij</sub> tensor.**

| Atom | x          | y          | z         | U(eq)     |
|------|------------|------------|-----------|-----------|
| Pd1  | 0          | 0          | 5000      | 20.30(17) |
| Cl1  | 1625.2(11) | 94.6(15)   | 6119.7(9) | 28.4(3)   |
| Cl2  | 740.2(11)  | 2392.3(15) | 4309.2(9) | 26.3(3)   |
| Cl3  | 5189.4(12) | 4788.5(16) | 7413.7(9) | 31.5(3)   |
| Cl4  | 2322.6(12) | 6660.9(16) | 4414.8(8) | 30.2(3)   |
| N1   | 1598(4)    | 5492(5)    | 6598(3)   | 20.3(9)   |
| C1   | 2735(4)    | 4649(6)    | 6158(3)   | 22.4(11)  |
| C2   | 1944(5)    | 6343(6)    | 7490(3)   | 27.1(11)  |
| C3   | 566(5)     | 4255(6)    | 6767(4)   | 26.8(11)  |
| C4   | 3797(4)    | 5826(6)    | 5900(3)   | 20.8(10)  |
| C5   | 3704(4)    | 6789(6)    | 5091(3)   | 23.2(10)  |
| C6   | 4692(5)    | 7828(6)    | 4801(4)   | 26.9(11)  |
| C7   | 5812(5)    | 7917(6)    | 5324(4)   | 28.3(12)  |
| C8   | 5956(5)    | 6973(6)    | 6131(4)   | 26.8(11)  |
| C9   | 4961(4)    | 5955(6)    | 6404(3)   | 23.5(11)  |

**Table 3 Anisotropic Displacement Parameters (Å<sup>2</sup>×103) for complex\_17. The Anisotropic displacement factor exponent takes the form:  $-2\pi^2[h^2a^{*2}U_{11}+2hka^*b^*U_{12}+\dots]$ .**

| Atom | U <sub>11</sub> | U <sub>22</sub> | U <sub>33</sub> | U <sub>23</sub> | U <sub>13</sub> | U <sub>12</sub> |
|------|-----------------|-----------------|-----------------|-----------------|-----------------|-----------------|
| Pd1  | 14.8(3)         | 22.3(3)         | 23.8(3)         | -1.5(2)         | 5.79(19)        | -2.2(2)         |
| Cl1  | 22.6(6)         | 34.1(7)         | 28.4(7)         | 2.3(5)          | 0.2(5)          | -4.6(5)         |
| Cl2  | 21.8(6)         | 26.1(6)         | 31.1(7)         | 4.3(5)          | 4.1(5)          | -3.7(5)         |
| Cl3  | 28.1(7)         | 41.7(8)         | 24.8(7)         | 2.6(6)          | 1.3(5)          | 6.0(6)          |
| Cl4  | 26.3(6)         | 39.8(7)         | 24.7(7)         | 2.9(6)          | 2.5(5)          | 6.0(5)          |
| N1   | 17(2)           | 22(2)           | 22(2)           | -1.1(16)        | 5.5(16)         | 0.1(16)         |
| C1   | 20(2)           | 23(3)           | 23(3)           | -2.2(19)        | 6.5(19)         | 1.3(19)         |
| C2   | 23(3)           | 33(3)           | 26(3)           | -3(2)           | 6(2)            | 1(2)            |
| C3   | 23(3)           | 30(3)           | 28(3)           | 0(2)            | 6(2)            | -7(2)           |
| C4   | 17(2)           | 23(3)           | 22(3)           | -3(2)           | 7.2(19)         | 5.0(19)         |
| C5   | 22(2)           | 22(2)           | 26(3)           | -4(2)           | 7(2)            | 4(2)            |
| C6   | 29(3)           | 21(2)           | 31(3)           | 2(2)            | 13(2)           | 1(2)            |
| C7   | 25(3)           | 19(2)           | 42(3)           | -7(2)           | 15(2)           | -2(2)           |
| C8   | 20(2)           | 28(3)           | 32(3)           | -10(2)          | 7(2)            | -2(2)           |
| C9   | 23(2)           | 24(3)           | 23(3)           | -4(2)           | 5.6(19)         | 6(2)            |

**Table 4 Bond Lengths for complex\_17.**

| Atom | Atom             | Length/Å   | Atom | Atom | Length/Å |
|------|------------------|------------|------|------|----------|
| Pd1  | Cl1 <sup>1</sup> | 2.3129(12) | N1   | C3   | 1.486(6) |
| Pd1  | Cl1              | 2.3129(12) | C1   | C4   | 1.504(6) |
| Pd1  | Cl2 <sup>1</sup> | 2.3058(12) | C4   | C5   | 1.394(7) |
| Pd1  | Cl2              | 2.3059(12) | C4   | C9   | 1.403(7) |
| Cl3  | C9               | 1.736(5)   | C5   | C6   | 1.391(7) |
| Cl4  | C5               | 1.724(5)   | C6   | C7   | 1.377(8) |
| N1   | C1               | 1.504(6)   | C7   | C8   | 1.387(7) |
| N1   | C2               | 1.486(6)   | C8   | C9   | 1.379(7) |

<sup>1</sup>-X,-Y,I-Z**Table 5 Bond Angles for complex\_17.**

| Atom             | Atom | Atom             | Angle/°   | Atom | Atom | Atom | Angle/°  |
|------------------|------|------------------|-----------|------|------|------|----------|
| Cl1 <sup>1</sup> | Pd1  | Cl1              | 180.0     | C5   | C4   | C9   | 115.7(4) |
| Cl2 <sup>1</sup> | Pd1  | Cl1 <sup>1</sup> | 91.34(4)  | C9   | C4   | C1   | 123.4(4) |
| Cl2              | Pd1  | Cl1              | 91.34(4)  | C4   | C5   | Cl4  | 118.7(4) |
| Cl2              | Pd1  | Cl1 <sup>1</sup> | 88.66(4)  | C6   | C5   | Cl4  | 118.8(4) |
| Cl2 <sup>1</sup> | Pd1  | Cl1              | 88.66(4)  | C6   | C5   | C4   | 122.5(5) |
| Cl2 <sup>1</sup> | Pd1  | Cl2              | 180.00(5) | C7   | C6   | C5   | 119.4(5) |
| C2               | N1   | C1               | 112.4(4)  | C6   | C7   | C8   | 120.3(4) |
| C3               | N1   | C1               | 109.3(4)  | C9   | C8   | C7   | 119.1(5) |
| C3               | N1   | C2               | 110.1(4)  | C4   | C9   | Cl3  | 119.7(4) |
| C4               | C1   | N1               | 113.2(4)  | C8   | C9   | Cl3  | 117.5(4) |
| C5               | C4   | C1               | 120.7(4)  | C8   | C9   | C4   | 122.9(5) |

## Complex\_16

molecular structure complex\_16 with 40% ellipsoids

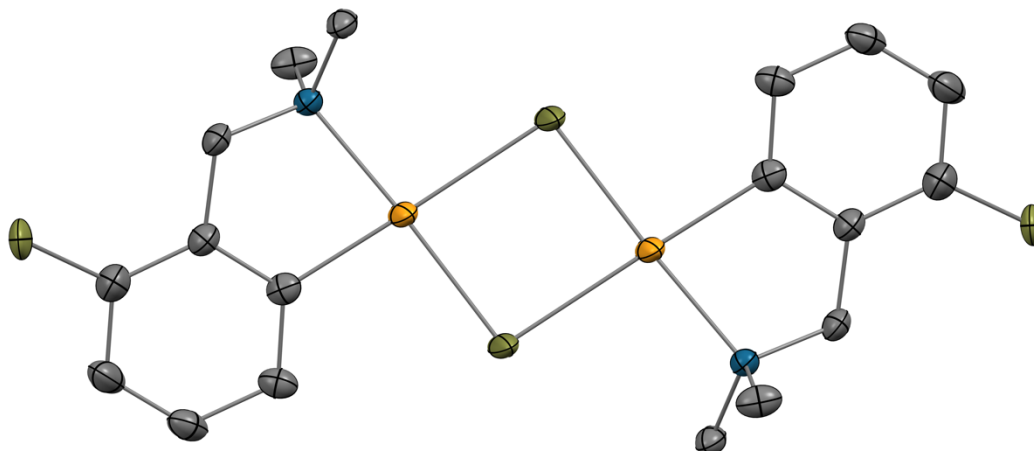

unit cell complex\_16 with 30% ellipsoids

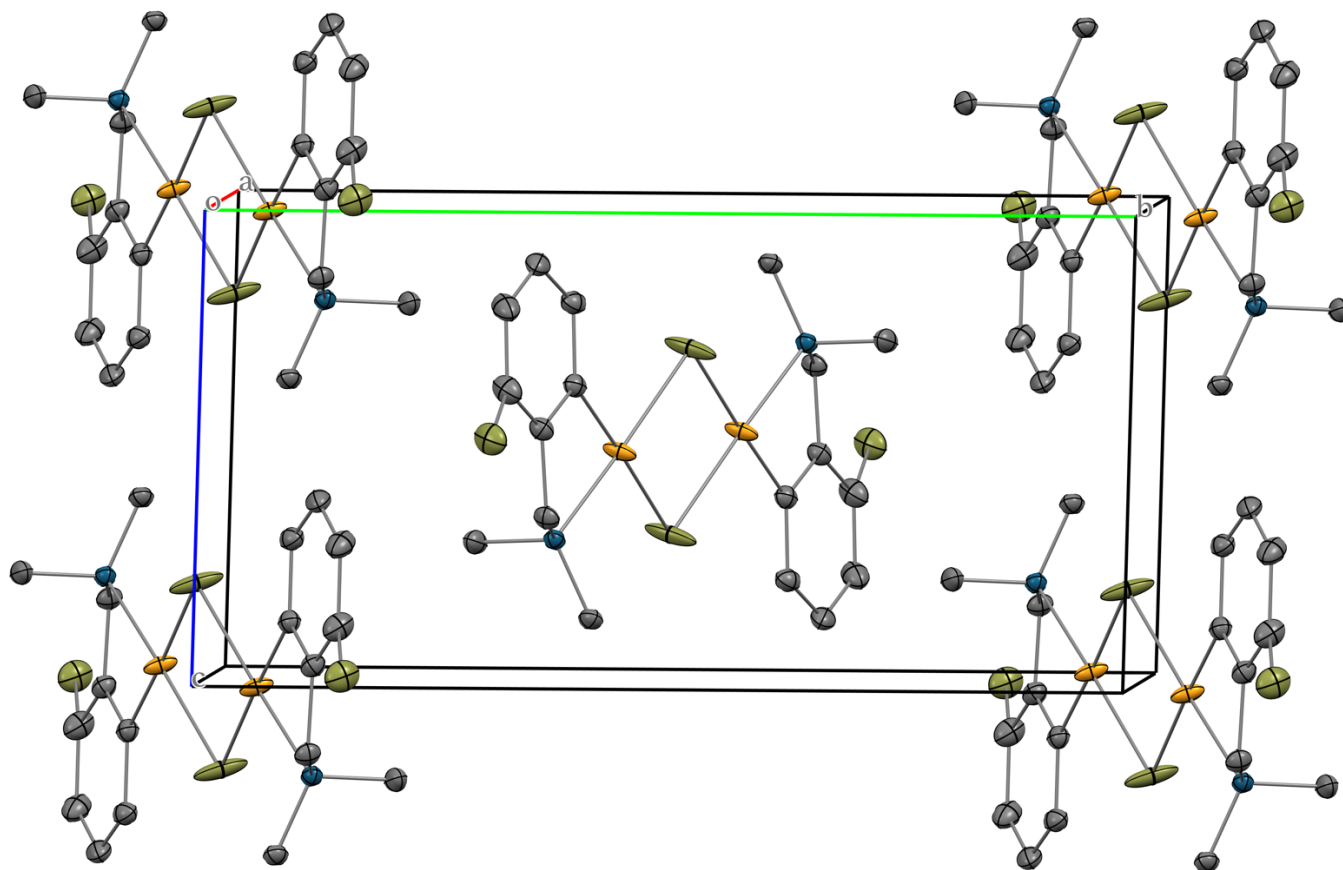

**Table 1 Crystal data and structure refinement for complex\_16.**

|                                             |                                                                                    |
|---------------------------------------------|------------------------------------------------------------------------------------|
| Identification code                         | complex_16                                                                         |
| Empirical formula                           | C <sub>18</sub> H <sub>23.6</sub> Cl <sub>2.4</sub> N <sub>2</sub> Pd <sub>2</sub> |
| Formula weight                              | 565.87                                                                             |
| Temperature/K                               | 100(2)                                                                             |
| Crystal system                              | monoclinic                                                                         |
| Space group                                 | P2 <sub>1</sub> /c                                                                 |
| a/Å                                         | 7.8606(4)                                                                          |
| b/Å                                         | 15.7100(9)                                                                         |
| c/Å                                         | 8.3499(4)                                                                          |
| α/°                                         | 90                                                                                 |
| β/°                                         | 108.6070(13)                                                                       |
| γ/°                                         | 90                                                                                 |
| Volume/Å <sup>3</sup>                       | 977.23(9)                                                                          |
| Z                                           | 2                                                                                  |
| ρ <sub>calc</sub> /g/cm <sup>3</sup>        | 1.923                                                                              |
| μ/mm <sup>-1</sup>                          | 2.171                                                                              |
| F(000)                                      | 557.0                                                                              |
| Crystal size/mm <sup>3</sup>                | 0.34 × 0.24 × 0.18                                                                 |
| Radiation                                   | MoKα (λ = 0.71073)                                                                 |
| 2Θ range for data collection/°              | 5.186 to 64.492                                                                    |
| Index ranges                                | -11 ≤ h ≤ 11, -23 ≤ k ≤ 23, -12 ≤ l ≤ 12                                           |
| Reflections collected                       | 54669                                                                              |
| Independent reflections                     | 3456 [R <sub>int</sub> = 0.0442, R <sub>sigma</sub> = 0.0186]                      |
| Data/restraints/parameters                  | 3456/0/120                                                                         |
| Goodness-of-fit on F <sup>2</sup>           | 1.290                                                                              |
| Final R indexes [I ≥ 2σ (I)]                | R <sub>1</sub> = 0.0419, wR <sub>2</sub> = 0.0876                                  |
| Final R indexes [all data]                  | R <sub>1</sub> = 0.0529, wR <sub>2</sub> = 0.0907                                  |
| Largest diff. peak/hole / e Å <sup>-3</sup> | 1.63/-0.80                                                                         |

$$R_{\text{int}} = \frac{\sum |F_o^2 - \langle F_o^2 \rangle|}{\sum |F_o^2|}$$

$$R_1 = \frac{\sum ||F_o| - |F_c||}{\sum |F_o|}$$

$$wR_2 = \left[ \frac{\sum [w(F_o^2 - F_c^2)^2]}{\sum [w(F_o^2)^2]} \right]^{1/2}$$

$$\text{Goodness-of-fit} = \left[ \frac{\sum [w(F_o^2 - F_c^2)^2]}{(n-p)} \right]^{1/2}$$

n: number of independent reflections; p: number of refined parameters

**Table 2 Fractional Atomic Coordinates (×104) and Equivalent Isotropic Displacement Parameters (Å<sup>2</sup>×103) for complex\_16.** U<sub>eq</sub> is defined as 1/3 of the trace of the orthogonalised U<sub>ij</sub> tensor.

| Atom | x          | y          | z          | U(eq)    |
|------|------------|------------|------------|----------|
| Pd1  | 3158.6(3)  | 585.3(2)   | 143.0(3)   | 30.69(9) |
| Cl1  | 6121.8(13) | 118.2(11)  | 2006.0(12) | 64.8(4)  |
| Cl2  | -3532(6)   | 1737(4)    | -385(7)    | 46.7(12) |
| N1   | 2415(3)    | 1232.3(16) | 1971(3)    | 21.7(5)  |
| C1   | 823(4)     | 1002(2)    | -1334(4)   | 25.9(6)  |
| C2   | 233(5)     | 1024(2)    | -3101(4)   | 30.4(7)  |
| C3   | -1444(5)   | 1356(2)    | -3970(4)   | 36.5(8)  |
| C4   | -2552(6)   | 1648(3)    | -3109(5)   | 42.5(9)  |
| C5   | -1979(5)   | 1628(3)    | -1354(5)   | 40.2(8)  |
| C6   | -288(4)    | 1308(2)    | -466(4)    | 28.4(6)  |
| C7   | 406(4)     | 1252(2)    | 1426(4)    | 27.6(6)  |
| C8   | 3128(6)    | 2108(2)    | 2065(4)    | 34.9(8)  |
| C9   | 3104(5)    | 844(2)     | 3665(4)    | 27.0(6)  |

**Table 3 Anisotropic Displacement Parameters (Å<sup>2</sup>×103) for complex\_16.** The Anisotropic displacement factor exponent takes the form:  $-2\pi^2[h^2a^{*2}U_{11}+2hka^*b^*U_{12}+\dots]$ .

| Atom | U <sub>11</sub> | U <sub>22</sub> | U <sub>33</sub> | U <sub>23</sub> | U <sub>13</sub> | U <sub>12</sub> |
|------|-----------------|-----------------|-----------------|-----------------|-----------------|-----------------|
| Pd1  | 20.00(11)       | 53.76(18)       | 19.35(11)       | -12.73(11)      | 7.75(8)         | 0.36(11)        |
| Cl1  | 27.3(4)         | 135.3(12)       | 26.0(4)         | -36.7(6)        | 0.3(3)          | 24.4(6)         |
| Cl2  | 32(2)           | 57(3)           | 49(3)           | -5(2)           | 11.1(19)        | 16(2)           |
| N1   | 24.2(11)        | 22.2(12)        | 20.6(11)        | -1.7(9)         | 9.9(9)          | -1.9(9)         |
| C1   | 26.9(14)        | 26.0(15)        | 25.5(14)        | -1.8(11)        | 9.3(11)         | -5.2(12)        |
| C2   | 33.8(16)        | 31.6(17)        | 25.6(14)        | -3.3(12)        | 9.1(12)         | -7.6(13)        |
| C3   | 44(2)           | 30.1(17)        | 27.0(15)        | -2.8(13)        | -1.0(14)        | -4.4(15)        |
| C4   | 38.7(19)        | 40(2)           | 37.5(19)        | -7.3(16)        | -3.4(15)        | 8.0(17)         |
| C5   | 31.1(17)        | 47(2)           | 39.5(19)        | -9.0(17)        | 7.3(15)         | 6.2(16)         |
| C6   | 28.5(15)        | 30.3(16)        | 27.5(14)        | -2.8(12)        | 10.6(12)        | -0.4(13)        |
| C7   | 27.0(14)        | 32.1(16)        | 27.0(14)        | -3.0(12)        | 13.3(12)        | 3.0(12)         |
| C8   | 50(2)           | 28.0(17)        | 28.3(15)        | -2.0(13)        | 15.0(15)        | -12.1(15)       |
| C9   | 33.0(16)        | 29.7(15)        | 20.9(13)        | -0.6(11)        | 12.4(12)        | 3.6(13)         |

**Table 4 Bond Lengths for complex\_16.**

| Atom | Atom             | Length/Å   | Atom | Atom | Length/Å |
|------|------------------|------------|------|------|----------|
| Pd1  | Cl1 <sup>1</sup> | 2.3257(9)  | C1   | C2   | 1.399(4) |
| Pd1  | Cl1              | 2.4641(10) | C1   | C6   | 1.386(4) |
| Pd1  | N1               | 2.068(2)   | C2   | C3   | 1.387(5) |
| Pd1  | C1               | 1.969(3)   | C3   | C4   | 1.373(6) |
| Cl2  | C5               | 1.674(6)   | C4   | C5   | 1.389(6) |
| N1   | C7               | 1.497(4)   | C5   | C6   | 1.394(5) |
| N1   | C8               | 1.478(4)   | C6   | C7   | 1.500(4) |
| N1   | C9               | 1.475(4)   |      |      |          |

<sup>1</sup>-X,-Y,-Z**Table 5 Bond Angles for complex\_16.**

| Atom             | Atom | Atom             | Angle/°    | Atom | Atom | Atom | Angle/°  |
|------------------|------|------------------|------------|------|------|------|----------|
| Cl1 <sup>1</sup> | Pd1  | Cl1              | 86.10(3)   | C2   | C1   | Pd1  | 126.7(3) |
| N1               | Pd1  | Cl1              | 96.50(7)   | C6   | C1   | Pd1  | 113.9(2) |
| N1               | Pd1  | Cl1 <sup>1</sup> | 177.38(8)  | C6   | C1   | C2   | 119.4(3) |
| C1               | Pd1  | Cl1 <sup>1</sup> | 94.74(10)  | C3   | C2   | C1   | 120.1(3) |
| C1               | Pd1  | Cl1              | 177.88(10) | C4   | C3   | C2   | 120.5(3) |
| C1               | Pd1  | N1               | 82.65(12)  | C3   | C4   | C5   | 119.9(4) |
| Pd1 <sup>1</sup> | Cl1  | Pd1              | 93.91(3)   | C4   | C5   | Cl2  | 117.8(4) |
| C7               | N1   | Pd1              | 107.75(18) | C4   | C5   | C6   | 120.1(4) |
| C8               | N1   | Pd1              | 107.74(19) | C6   | C5   | Cl2  | 119.9(4) |
| C8               | N1   | C7               | 110.0(3)   | C1   | C6   | C5   | 120.0(3) |
| C9               | N1   | Pd1              | 113.64(19) | C1   | C6   | C7   | 116.9(3) |
| C9               | N1   | C7               | 109.2(2)   | C5   | C6   | C7   | 123.1(3) |
| C9               | N1   | C8               | 108.5(3)   | N1   | C7   | C6   | 108.4(2) |

## Complex\_6c

NAc-Leu and primary coordination sphere with 30% ellipsoids

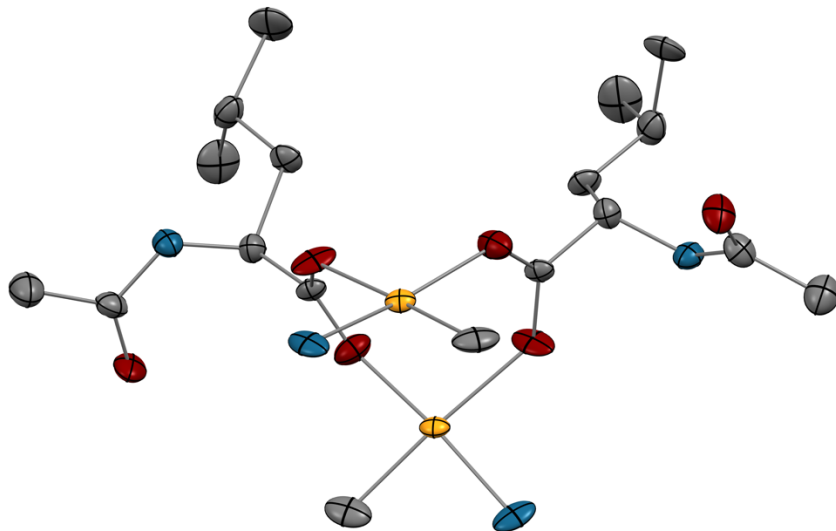

molecular structure complex\_6c with 30% ellipsoids on MPAA; dmba disorder masked

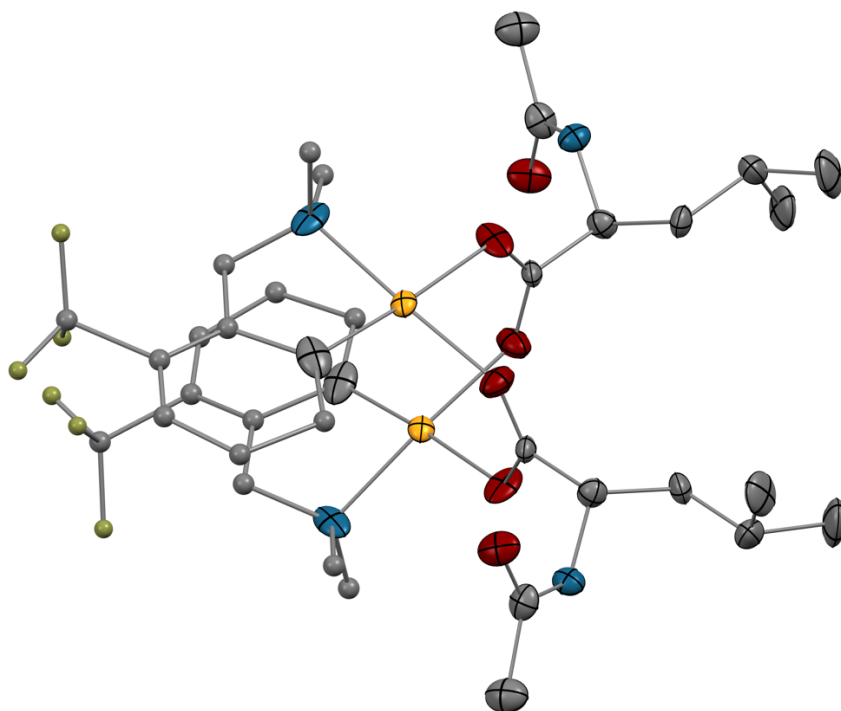

molecular structure complex\_6c with disorder over dmbs shown

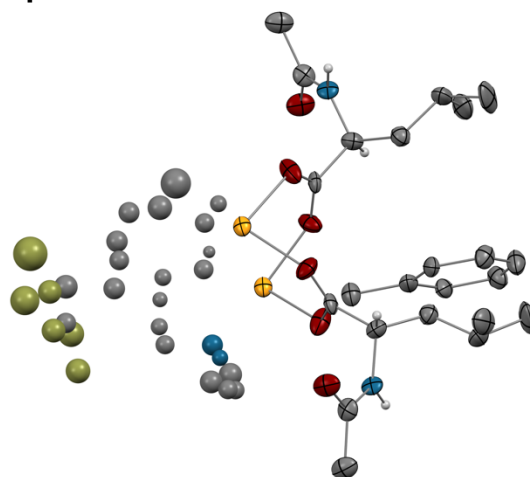

unit cell\_6c with hydrogen bonding emphasized and dmbs disorder masked

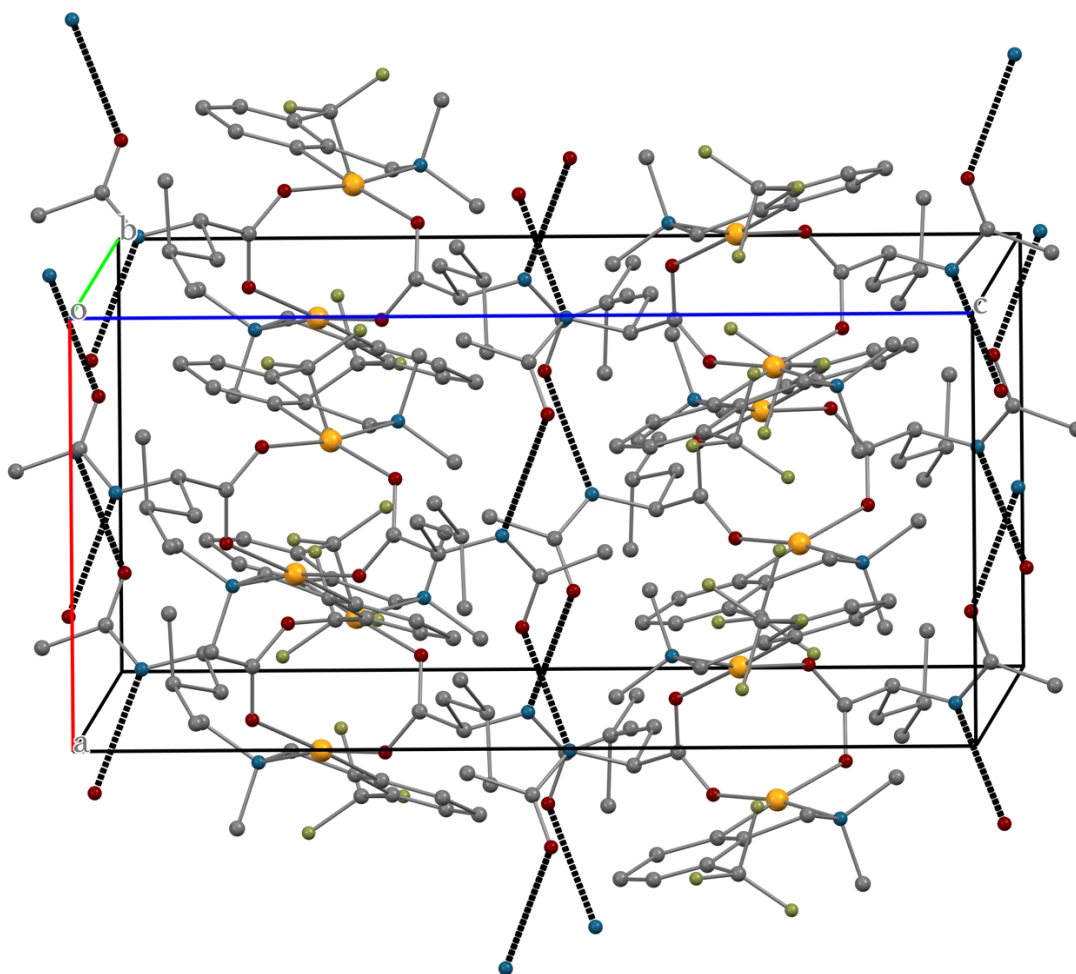



**Table 1 Crystal data and structure refinement for complex\_6c.**

|                                             |                                                                                              |
|---------------------------------------------|----------------------------------------------------------------------------------------------|
| Identification code                         | complex_6c                                                                                   |
| Empirical formula                           | C <sub>43</sub> H <sub>58</sub> F <sub>6</sub> N <sub>4</sub> O <sub>6</sub> Pd <sub>2</sub> |
| Formula weight                              | 1053.73                                                                                      |
| Temperature/K                               | 100(2)                                                                                       |
| Crystal system                              | orthorhombic                                                                                 |
| Space group                                 | C222 <sub>1</sub>                                                                            |
| a/Å                                         | 9.2657(11)                                                                                   |
| b/Å                                         | 29.630(4)                                                                                    |
| c/Å                                         | 19.311(3)                                                                                    |
| α/°                                         | 90                                                                                           |
| β/°                                         | 90                                                                                           |
| γ/°                                         | 90                                                                                           |
| Volume/Å <sup>3</sup>                       | 5301.8(12)                                                                                   |
| Z                                           | 4                                                                                            |
| ρ <sub>calc</sub> /g/cm <sup>3</sup>        | 1.320                                                                                        |
| μ/mm <sup>-1</sup>                          | 0.742                                                                                        |
| F(000)                                      | 2152.0                                                                                       |
| Crystal size/mm <sup>3</sup>                | 0.28 × 0.14 × 0.08                                                                           |
| Radiation                                   | MoKα (λ = 0.71073)                                                                           |
| 2θ range for data collection/°              | 4.6 to 50.04                                                                                 |
| Index ranges                                | -10 ≤ h ≤ 10, -34 ≤ k ≤ 29, -20 ≤ l ≤ 22                                                     |
| Reflections collected                       | 21110                                                                                        |
| Independent reflections                     | 4174 [R <sub>int</sub> = 0.0712, R <sub>sigma</sub> = 0.0778]                                |
| Data/restraints/parameters                  | 4174/105/271                                                                                 |
| Goodness-of-fit on F <sup>2</sup>           | 1.050                                                                                        |
| Final R indexes [I ≥ 2σ (I)]                | R <sub>1</sub> = 0.0650, wR <sub>2</sub> = 0.1400                                            |
| Final R indexes [all data]                  | R <sub>1</sub> = 0.0899, wR <sub>2</sub> = 0.1490                                            |
| Largest diff. peak/hole / e Å <sup>-3</sup> | 2.10/-0.90                                                                                   |
| Flack parameter                             | 0.017(19)                                                                                    |

$$R_{\text{int}} = \frac{\sum |F_o^2 - \langle F_o^2 \rangle|}{\sum |F_o^2|}$$

$$R_1 = \frac{\sum ||F_o| - |F_c||}{\sum |F_o|}$$

$$wR_2 = \left[ \frac{\sum [w (F_o^2 - F_c^2)^2]}{\sum [w (F_o^2)^2]} \right]^{1/2}$$

$$\text{Goodness-of-fit} = \left[ \frac{\sum [w (F_o^2 - F_c^2)^2]}{(n-p)} \right]^{1/2}$$

n: number of independent reflections; p: number of refined parameters

**Table 2 Fractional Atomic Coordinates ( $\times 10^4$ ) and Equivalent Isotropic Displacement Parameters ( $\text{\AA}^2 \times 10^3$ ) for complex\_6c.  $U_{eq}$  is defined as 1/3 of of the trace of the orthogonalised  $U_{ij}$  tensor.**

| Atom | <i>x</i>   | <i>y</i>  | <i>z</i>  | $U_{eq}$ |
|------|------------|-----------|-----------|----------|
| Pd1  | 1538.1(10) | 6728.9(3) | 7702.0(5) | 35.5(3)  |
| O1   | 1496(12)   | 7217(3)   | 6969(5)   | 51(2)    |
| O2   | -741(10)   | 7191(3)   | 6559(6)   | 59(3)    |
| O3   | 2682(10)   | 7262(4)   | 5159(5)   | 57(3)    |
| N2   | 512(11)    | 7579(4)   | 5366(6)   | 38(3)    |
| C1   | 982(16)    | 7247(6)   | 4255(8)   | 59(4)    |
| C2   | 1470(16)   | 7369(4)   | 4962(7)   | 44(3)    |
| C3   | -480(20)   | 8955(5)   | 6034(10)  | 93(7)    |
| C4   | 1991(19)   | 8656(6)   | 5717(9)   | 75(6)    |
| C5   | 380(20)    | 8543(5)   | 5766(8)   | 61(5)    |
| C6   | 114(16)    | 8144(4)   | 6243(8)   | 46(4)    |
| C7   | 897(15)    | 7705(5)   | 6062(7)   | 42(3)    |
| C8   | 521(14)    | 7342(4)   | 6578(7)   | 37(3)    |
| C19  | 5000       | 7357(6)   | 7500      | 48(6)    |
| C20  | 5000       | 7860(6)   | 7500      | 48(5)    |
| C21  | 3748(13)   | 8115(3)   | 7531(7)   | 45(4)    |
| C22  | 3677(13)   | 8582(3)   | 7547(8)   | 53(4)    |
| C23  | 5000       | 8800(6)   | 7500      | 63(7)    |
| C16  | 3370(20)   | 6295(9)   | 8738(15)  | 38(7)    |
| C17  | 880(30)    | 6309(10)  | 9091(13)  | 43(7)    |
| N1   | 1851(19)   | 6256(6)   | 8495(12)  | 30(7)    |
| C15  | 1650(30)   | 5814(6)   | 8205(15)  | 41(7)    |
| C9   | 2310(30)   | 6225(7)   | 7188(16)  | 44(9)    |
| C10  | 2770(30)   | 6283(10)  | 6492(14)  | 43(7)    |
| C11  | 3250(40)   | 5910(11)  | 6095(17)  | 68(9)    |
| C12  | 3130(30)   | 5504(9)   | 6456(16)  | 52(8)    |
| C13  | 2750(30)   | 5427(6)   | 7144(14)  | 53(7)    |
| C14  | 2220(20)   | 5816(6)   | 7495(17)  | 26(6)    |
| C18  | 2740(20)   | 4970(6)   | 7485(10)  | 47(7)    |
| F1   | 1411(15)   | 4896(4)   | 7759(8)   | 64(5)    |
| F2   | 3704(17)   | 4977(5)   | 8017(9)   | 69(5)    |
| F3   | 3070(20)   | 4643(6)   | 7024(10)  | 96(7)    |
| C16A | 3540(30)   | 6269(14)  | 8490(20)  | 61(13)   |
| C17A | 1120(40)   | 6170(14)  | 8909(18)  | 58(13)   |
| N1A  | 2010(30)   | 6204(9)   | 8278(16)  | 50(12)   |
| C15A | 1880(30)   | 5783(8)   | 7911(17)  | 33(9)    |
| C9A  | 2280(30)   | 6297(8)   | 6970(15)  | 17(8)    |
| C10A | 2660(30)   | 6430(11)  | 6285(15)  | 32(8)    |

|      |          |          |          |         |
|------|----------|----------|----------|---------|
| C11A | 3110(60) | 6083(15) | 5830(20) | 104(19) |
| C12A | 3110(40) | 5646(11) | 6101(19) | 50(10)  |
| C13A | 2790(30) | 5507(8)  | 6770(17) | 44(9)   |
| C14A | 2300(30) | 5869(7)  | 7190(20) | 33(9)   |
| C18A | 2730(30) | 5020(9)  | 6997(15) | 63(11)  |
| F1A  | 1386(19) | 4918(6)  | 7230(11) | 63(6)   |
| F3A  | 2900(30) | 4759(10) | 6433(16) | 133(12) |
| F2A  | 3770(20) | 4968(7)  | 7489(13) | 76(8)   |

**Table 3 Anisotropic Displacement Parameters ( $\text{\AA}^2 \times 10^3$ ) for complex\_6c. The Anisotropic displacement factor exponent takes the form:  $-2\pi^2[h^2a^{*2}U_{11}+2hka^*b^*U_{12}+\dots]$ .**

| Atom | $U_{11}$ | $U_{22}$ | $U_{33}$ | $U_{23}$ | $U_{13}$ | $U_{12}$ |
|------|----------|----------|----------|----------|----------|----------|
| Pd1  | 21.9(4)  | 34.2(5)  | 50.4(6)  | -1.0(5)  | -4.7(5)  | 1.5(5)   |
| O1   | 38(5)    | 59(6)    | 57(6)    | 21(5)    | -15(6)   | -5(6)    |
| O2   | 29(5)    | 53(6)    | 94(9)    | 28(6)    | -18(5)   | -14(5)   |
| O3   | 32(5)    | 86(8)    | 52(6)    | -6(5)    | 9(4)     | 19(5)    |
| N2   | 16(5)    | 52(7)    | 46(6)    | 1(5)     | -9(5)    | 3(4)     |
| C1   | 47(9)    | 84(12)   | 46(8)    | 1(8)     | 9(6)     | 20(8)    |
| C2   | 26(6)    | 51(8)    | 55(7)    | 0(6)     | 7(6)     | 13(6)    |
| C3   | 150(20)  | 29(9)    | 95(15)   | -5(9)    | 36(15)   | 27(10)   |
| C4   | 100(16)  | 53(10)   | 71(11)   | 15(8)    | 7(10)    | -32(10)  |
| C5   | 100(15)  | 47(9)    | 36(10)   | 8(8)     | -2(10)   | -1(9)    |
| C6   | 45(8)    | 42(7)    | 51(10)   | 4(7)     | -6(6)    | 0(6)     |
| C7   | 40(8)    | 51(8)    | 35(7)    | 5(6)     | 0(6)     | 5(6)     |
| C8   | 33(8)    | 20(7)    | 58(9)    | -2(6)    | -5(8)    | -6(6)    |
| C19  | 36(10)   | 39(9)    | 68(18)   | 0        | -3(9)    | 0        |
| C20  | 73(12)   | 38(9)    | 34(13)   | 0        | 0(9)     | 0        |
| C21  | 53(8)    | 34(6)    | 47(9)    | 1(5)     | -7(6)    | -13(5)   |
| C22  | 46(8)    | 47(7)    | 66(11)   | -11(7)   | -6(7)    | 13(6)    |
| C23  | 62(11)   | 37(11)   | 90(20)   | 0        | -26(12)  | 0        |

**Table 4 Bond Lengths for complex\_6c.**

| Atom | Atom             | Length/Å   | Atom | Atom | Length/Å  |
|------|------------------|------------|------|------|-----------|
| Pd1  | Pd1 <sup>1</sup> | 2.9552(19) | C15  | C14  | 1.47(3)   |
| Pd1  | O1               | 2.024(8)   | C9   | C10  | 1.42(3)   |
| Pd1  | O2 <sup>1</sup>  | 2.113(10)  | C9   | C14  | 1.35(3)   |
| Pd1  | N1               | 2.095(19)  | C10  | C11  | 1.42(3)   |
| Pd1  | C9               | 1.93(2)    | C11  | C12  | 1.39(4)   |
| Pd1  | N1A              | 1.96(3)    | C12  | C13  | 1.39(4)   |
| Pd1  | C9A              | 2.03(2)    | C13  | C14  | 1.42(3)   |
| O1   | C8               | 1.234(16)  | C13  | C18  | 1.51(2)   |
| O2   | C8               | 1.252(15)  | C18  | F1   | 1.360(18) |
| O3   | C2               | 1.228(17)  | C18  | F2   | 1.359(19) |
| N2   | C2               | 1.335(16)  | C18  | F3   | 1.350(17) |
| N2   | C7               | 1.441(17)  | C16A | N1A  | 1.48(3)   |
| C1   | C2               | 1.48(2)    | C17A | N1A  | 1.48(3)   |
| C3   | C5               | 1.55(2)    | N1A  | C15A | 1.44(3)   |
| C4   | C5               | 1.53(3)    | C15A | C14A | 1.47(4)   |
| C5   | C6               | 1.518(18)  | C9A  | C10A | 1.42(3)   |
| C6   | C7               | 1.529(18)  | C9A  | C14A | 1.34(3)   |
| C7   | C8               | 1.508(18)  | C10A | C11A | 1.41(3)   |
| C19  | C20              | 1.49(2)    | C11A | C12A | 1.40(4)   |
| C20  | C21              | 1.385(8)   | C12A | C13A | 1.39(4)   |
| C20  | C21 <sup>2</sup> | 1.385(8)   | C13A | C14A | 1.42(3)   |
| C21  | C22              | 1.386(8)   | C13A | C18A | 1.51(3)   |
| C22  | C23              | 1.388(8)   | C18A | F1A  | 1.36(2)   |
| C16  | N1               | 1.49(2)    | C18A | F3A  | 1.34(3)   |
| C17  | N1               | 1.47(3)    | C18A | F2A  | 1.37(2)   |
| N1   | C15              | 1.44(3)    |      |      |           |

<sup>1</sup>-X,+Y,3/2-Z; <sup>2</sup>1-X,+Y,3/2-Z

**Table 5 Bond Angles for complex\_6c.**

| Atom             | Atom | Atom             | Angle/°   | Atom | Atom | Atom | Angle/°   |
|------------------|------|------------------|-----------|------|------|------|-----------|
| O1               | Pd1  | Pd1 <sup>1</sup> | 78.3(3)   | C10  | C9   | Pd1  | 120.2(19) |
| O1               | Pd1  | O2 <sup>1</sup>  | 90.2(4)   | C14  | C9   | Pd1  | 116(2)    |
| O1               | Pd1  | N1               | 172.5(6)  | C14  | C9   | C10  | 123(2)    |
| O1               | Pd1  | C9A              | 88.2(9)   | C9   | C10  | C11  | 121(3)    |
| O2 <sup>1</sup>  | Pd1  | Pd1 <sup>1</sup> | 80.9(3)   | C12  | C11  | C10  | 112(3)    |
| N1               | Pd1  | Pd1 <sup>1</sup> | 109.0(5)  | C13  | C12  | C11  | 130(2)    |
| N1               | Pd1  | O2 <sup>1</sup>  | 89.3(7)   | C12  | C13  | C14  | 114(2)    |
| C9               | Pd1  | Pd1 <sup>1</sup> | 102.8(9)  | C12  | C13  | C18  | 124.4(19) |
| C9               | Pd1  | O1               | 101.5(10) | C14  | C13  | C18  | 121(2)    |
| C9               | Pd1  | O2 <sup>1</sup>  | 168.2(10) | C9   | C14  | C15  | 115.7(18) |
| C9               | Pd1  | N1               | 78.9(11)  | C9   | C14  | C13  | 120(3)    |
| N1A              | Pd1  | O1               | 165.3(10) | C13  | C14  | C15  | 124(2)    |
| N1A              | Pd1  | O2 <sup>1</sup>  | 102.1(10) | F1   | C18  | C13  | 108.6(16) |
| N1A              | Pd1  | C9A              | 79.6(13)  | F2   | C18  | C13  | 108.3(17) |
| C9A              | Pd1  | O2 <sup>1</sup>  | 178.3(10) | F2   | C18  | F1   | 107.7(15) |
| C8               | O1   | Pd1              | 131.0(9)  | F3   | C18  | C13  | 110.9(16) |
| C8               | O2   | Pd1 <sup>1</sup> | 122.5(9)  | F3   | C18  | F1   | 110.0(16) |
| C2               | N2   | C7               | 120.1(11) | F3   | C18  | F2   | 111.3(17) |
| O3               | C2   | N2               | 123.2(13) | C16A | N1A  | Pd1  | 106(2)    |
| O3               | C2   | C1               | 120.1(12) | C17A | N1A  | Pd1  | 113(2)    |
| N2               | C2   | C1               | 116.7(13) | C17A | N1A  | C16A | 108(3)    |
| C4               | C5   | C3               | 110.6(15) | C15A | N1A  | Pd1  | 113(2)    |
| C6               | C5   | C3               | 109.0(13) | C15A | N1A  | C16A | 109(3)    |
| C6               | C5   | C4               | 111.7(14) | C15A | N1A  | C17A | 107(2)    |
| C5               | C6   | C7               | 116.4(13) | N1A  | C15A | C14A | 107(2)    |
| N2               | C7   | C6               | 108.5(11) | C10A | C9A  | Pd1  | 123.9(19) |
| N2               | C7   | C8               | 111.9(11) | C14A | C9A  | Pd1  | 112(2)    |
| C8               | C7   | C6               | 110.3(11) | C14A | C9A  | C10A | 123(2)    |
| O1               | C8   | O2               | 126.5(12) | C11A | C10A | C9A  | 117(3)    |
| O1               | C8   | C7               | 116.7(11) | C12A | C11A | C10A | 116(3)    |
| O2               | C8   | C7               | 116.8(12) | C13A | C12A | C11A | 128(3)    |
| C21              | C20  | C19              | 123.0(8)  | C12A | C13A | C14A | 112(3)    |
| C21 <sup>2</sup> | C20  | C19              | 123.0(8)  | C12A | C13A | C18A | 124(2)    |
| C21 <sup>2</sup> | C20  | C21              | 113.9(16) | C14A | C13A | C18A | 123(3)    |
| C20              | C21  | C22              | 125.8(13) | C9A  | C14A | C15A | 117(2)    |
| C21              | C22  | C23              | 114.9(13) | C9A  | C14A | C13A | 123(3)    |
| C22              | C23  | C22 <sup>2</sup> | 124.6(16) | C13A | C14A | C15A | 120(3)    |
| C16              | N1   | Pd1              | 108.1(14) | F1A  | C18A | C13A | 110(2)    |
| C17              | N1   | Pd1              | 114.6(15) | F1A  | C18A | F2A  | 113(2)    |
| C17              | N1   | C16              | 109(2)    | F3A  | C18A | C13A | 108(2)    |

|     |     |     |           |     |          |        |
|-----|-----|-----|-----------|-----|----------|--------|
| C15 | N1  | Pd1 | 107.8(16) | F3A | C18AF1A  | 104(2) |
| C15 | N1  | C16 | 108.6(18) | F3A | C18AF2A  | 115(2) |
| C15 | N1  | C17 | 108.7(19) | F2A | C18AC13A | 106(2) |
| N1  | C15 | C14 | 108.2(17) |     |          |        |

## Complex\_S1.4

molecular structure complex\_S1.4 with 30% ellipsoids

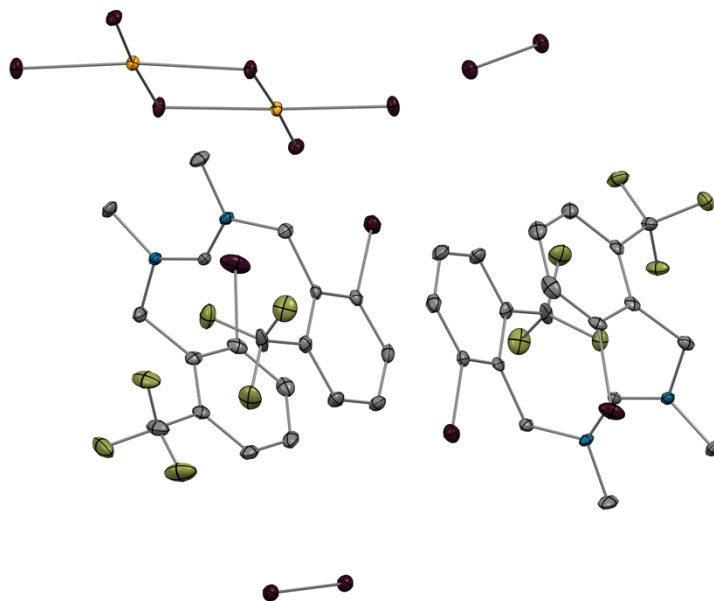

organic formamidinium fragment in complex\_S1.4 with 50% ellipsoids

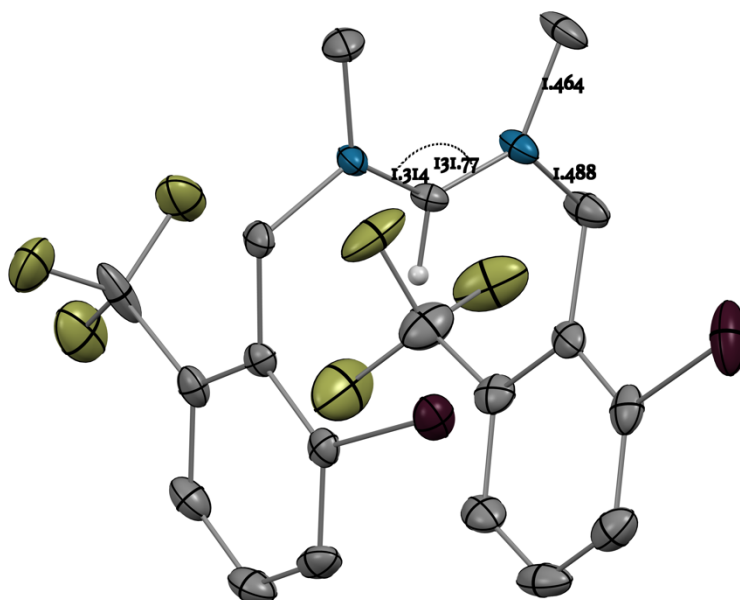



inorganic iodopalladate fragment in complex\_S1.4 with 50% ellipsoids

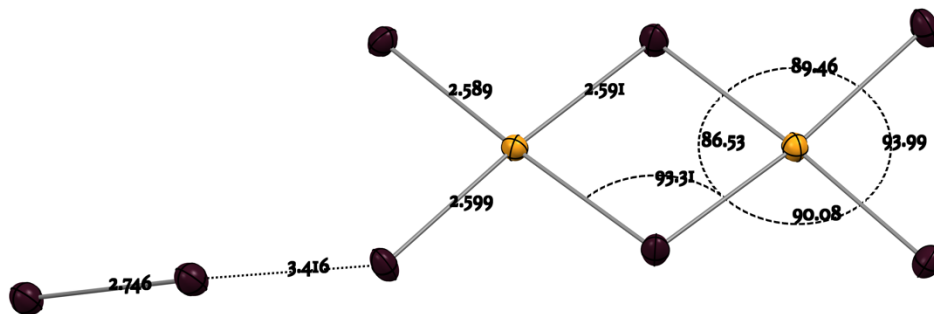

unit cell complex\_S1.4 with 30% ellipsoids

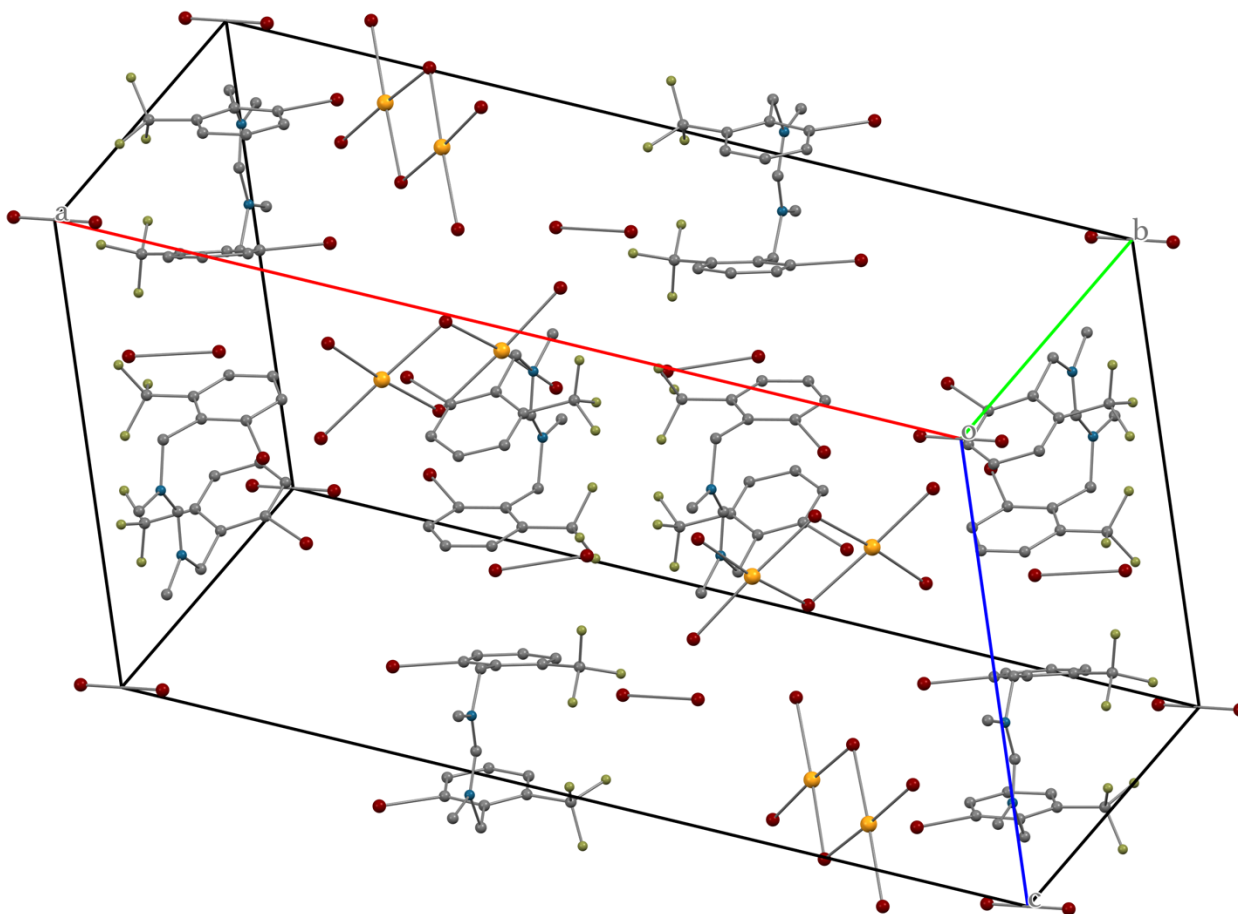

iodine/iodide networks in complex\_S1.4

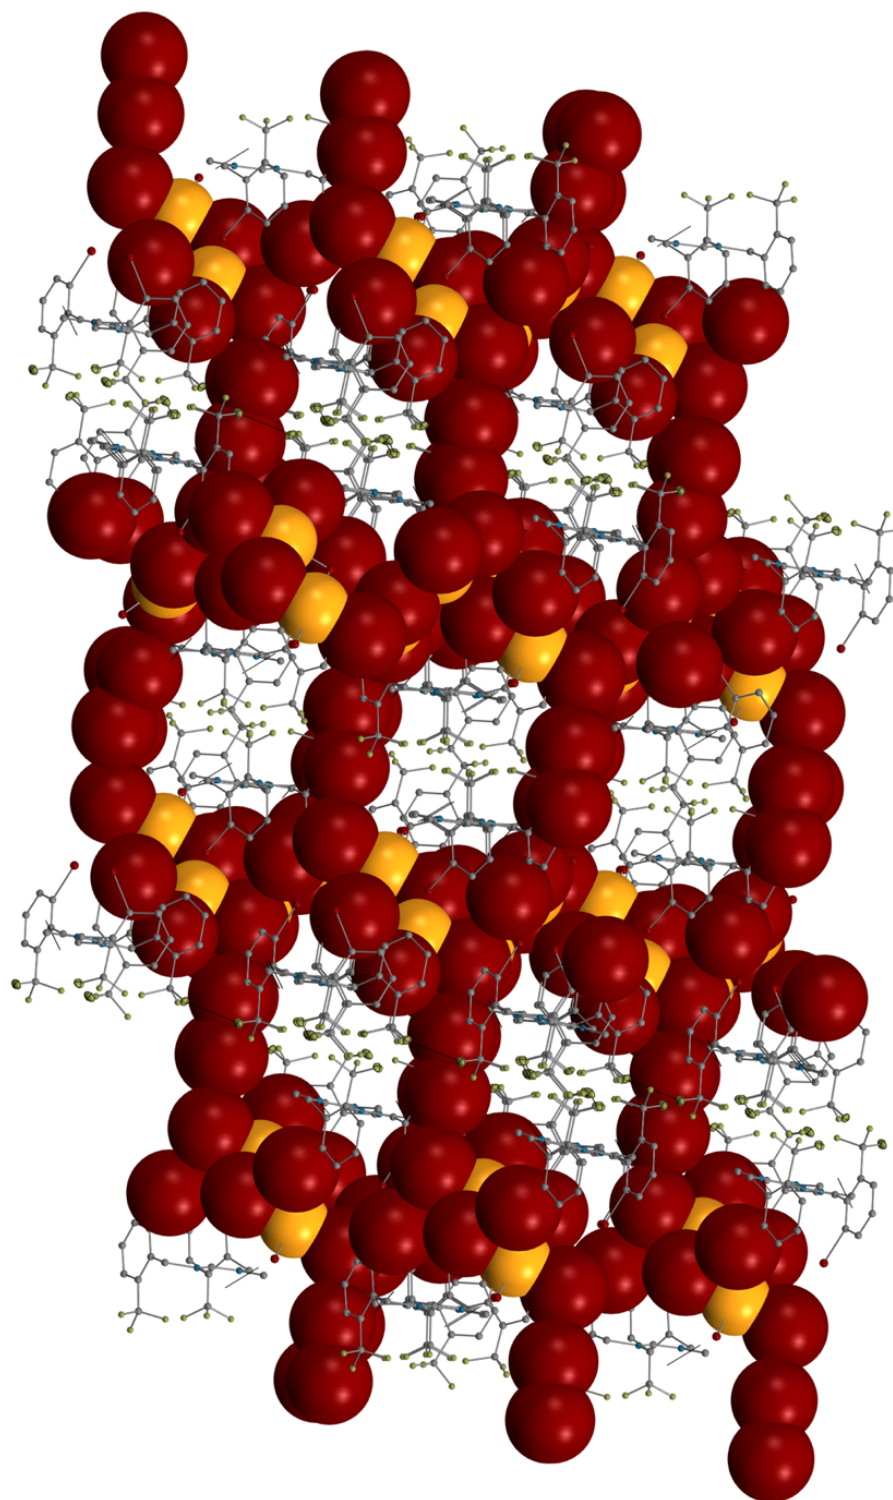

**Table 1 Crystal data and structure refinement for complex\_S1.4.**

|                                             |                                                                                                |
|---------------------------------------------|------------------------------------------------------------------------------------------------|
| Identification code                         | complex_S1.4                                                                                   |
| Empirical formula                           | C <sub>38</sub> H <sub>34</sub> F <sub>12</sub> I <sub>12</sub> N <sub>4</sub> Pd <sub>2</sub> |
| Formula weight                              | 2510.29                                                                                        |
| Temperature/K                               | 100(2)                                                                                         |
| Crystal system                              | monoclinic                                                                                     |
| Space group                                 | P2 <sub>1</sub> /c                                                                             |
| a/Å                                         | 28.337(5)                                                                                      |
| b/Å                                         | 13.971(3)                                                                                      |
| c/Å                                         | 14.982(3)                                                                                      |
| α/°                                         | 90                                                                                             |
| β/°                                         | 102.276(5)                                                                                     |
| γ/°                                         | 90                                                                                             |
| Volume/Å <sup>3</sup>                       | 5795.8(19)                                                                                     |
| Z                                           | 4                                                                                              |
| ρ <sub>calc</sub> /g/cm <sup>3</sup>        | 2.877                                                                                          |
| μ/mm <sup>-1</sup>                          | 7.083                                                                                          |
| F(000)                                      | 4504.0                                                                                         |
| Crystal size/mm <sup>3</sup>                | 0.32 × 0.21 × 0.14                                                                             |
| Radiation                                   | MoKα (λ = 0.71073)                                                                             |
| 2Θ range for data collection/°              | 4.414 to 54.392                                                                                |
| Index ranges                                | -36 ≤ h ≤ 36, -17 ≤ k ≤ 17, -19 ≤ l ≤ 19                                                       |
| Reflections collected                       | 155125                                                                                         |
| Independent reflections                     | 12881 [R <sub>int</sub> = 0.0515, R <sub>sigma</sub> = 0.0247]                                 |
| Data/restraints/parameters                  | 12881/0/617                                                                                    |
| Goodness-of-fit on F <sup>2</sup>           | 1.069                                                                                          |
| Final R indexes [I ≥ 2σ (I)]                | R <sub>1</sub> = 0.0279, wR <sub>2</sub> = 0.0562                                              |
| Final R indexes [all data]                  | R <sub>1</sub> = 0.0406, wR <sub>2</sub> = 0.0603                                              |
| Largest diff. peak/hole / e Å <sup>-3</sup> | 2.70/-1.12                                                                                     |

$$R_{\text{int}} = \frac{\sum |F_o^2 - \langle F_o^2 \rangle|}{\sum |F_o^2|}$$

$$R_1 = \frac{\sum ||F_o| - |F_c||}{\sum |F_o|}$$

$$wR_2 = \left[ \frac{\sum [w(F_o^2 - F_c^2)^2]}{\sum [w(F_o^2)^2]} \right]^{1/2}$$

$$\text{Goodness-of-fit} = \left[ \frac{\sum [w(F_o^2 - F_c^2)^2]}{(n-p)} \right]^{1/2}$$

n: number of independent reflections; p: number of refined parameters

**Table 2 Fractional Atomic Coordinates ( $\times 10^4$ ) and Equivalent Isotropic Displacement Parameters ( $\text{\AA}^2 \times 10^3$ ) for complex\_S1.4.  $U_{eq}$  is defined as 1/3 of the trace of the orthogonalised  $U_{ij}$  tensor.**

| Atom | <i>x</i>   | <i>y</i>   | <i>z</i>   | $U_{eq}$ |
|------|------------|------------|------------|----------|
| Pd1  | 2009.6(2)  | 3579.0(2)  | 4787.8(2)  | 14.11(7) |
| Pd2  | 3007.0(2)  | 1736.0(2)  | 5091.6(2)  | 14.97(7) |
| I1   | 1328.3(2)  | 4063.9(2)  | 3420.0(2)  | 19.23(7) |
| I2   | 1718.5(2)  | 4736.2(2)  | 5918.3(2)  | 20.49(7) |
| I3   | 2336.7(2)  | 2366.8(2)  | 3758.0(2)  | 21.40(7) |
| I4   | 2703.5(2)  | 3004.4(2)  | 6105.4(2)  | 19.00(7) |
| I5   | 3310.0(2)  | 609.4(2)   | 3953.9(2)  | 23.29(7) |
| I6   | 3650.2(2)  | 1163.6(2)  | 6489.6(2)  | 20.08(7) |
| I7   | 491.6(2)   | 4875.2(2)  | 5227.0(2)  | 23.55(7) |
| I8   | 4519.6(2)  | 10239.9(2) | 4719.7(2)  | 23.39(7) |
| I9   | 2136.2(2)  | 10632.3(3) | 6170.0(2)  | 33.42(9) |
| I10  | 2155.9(2)  | 9166.7(2)  | 3732.9(2)  | 26.88(8) |
| F1   | 64.3(11)   | 8390(2)    | 2026(2)    | 39.1(8)  |
| F2   | -150.9(11) | 7805(2)    | 3202(2)    | 38.1(7)  |
| F3   | 90.9(10)   | 9253(2)    | 3206.6(18) | 26.9(6)  |
| F4   | 241.9(9)   | 9087(2)    | 5102.8(18) | 27.2(6)  |
| F5   | 228(1)     | 8843(2)    | 6510.6(19) | 30.9(7)  |
| F6   | 261.2(10)  | 7657.3(19) | 5613(2)    | 32.0(7)  |
| N1   | 1002.1(13) | 10435(2)   | 3482(2)    | 14.8(7)  |
| N2   | 959.4(13)  | 10828(2)   | 5013(2)    | 15.7(8)  |
| C1   | 163.5(19)  | 8389(4)    | 2901(4)    | 32.3(13) |
| C2   | 683.9(17)  | 8038(3)    | 3300(3)    | 19.5(10) |
| C3   | 752.8(19)  | 7127(3)    | 3651(3)    | 25.2(11) |
| C4   | 1218(2)    | 6793(3)    | 4005(3)    | 29.3(12) |
| C5   | 1610.4(18) | 7379(3)    | 4018(3)    | 25.0(11) |
| C6   | 1538.4(17) | 8306(3)    | 3661(3)    | 18.9(9)  |
| C7   | 1081.8(16) | 8650(3)    | 3279(3)    | 16.6(9)  |
| C8   | 1013.7(16) | 9623(3)    | 2845(3)    | 16.8(9)  |
| C9   | 983(2)     | 11371(3)   | 3031(3)    | 31.0(12) |
| C10  | 991.4(15)  | 10261(3)   | 4335(3)    | 14.0(8)  |
| C11  | 919(2)     | 11880(3)   | 4998(3)    | 27.9(11) |
| C12  | 974.1(17)  | 10403(3)   | 5925(3)    | 19.2(10) |
| C13  | 1222.6(16) | 9436(3)    | 6076(3)    | 17.2(9)  |
| C14  | 1724.5(16) | 9396(3)    | 6257(3)    | 20.5(10) |
| C15  | 1966.8(18) | 8540(4)    | 6454(3)    | 31.4(12) |
| C16  | 1711.1(19) | 7698(4)    | 6471(3)    | 30.4(12) |
| C17  | 1215.9(18) | 7710(4)    | 6270(3)    | 25.0(11) |
| C18  | 973.0(16)  | 8574(3)    | 6069(3)    | 18.2(9)  |

|     |            |           |           |           |
|-----|------------|-----------|-----------|-----------|
| C19 | 431.2(17)  | 8540(3)   | 5830(3)   | 21.3(10)  |
| I11 | 2879.7(2)  | 6109.8(2) | 6320.2(2) | 25.93(7)  |
| I12 | 2739.9(2)  | 5050.6(3) | 3722.3(2) | 44.12(11) |
| F7  | 4989.0(11) | 6588(2)   | 7878(2)   | 42.0(8)   |
| F8  | 5211.1(11) | 7267(2)   | 6767(2)   | 43.1(8)   |
| F9  | 4939.6(10) | 5835(2)   | 6634(2)   | 35.4(7)   |
| F10 | 4862.2(12) | 7291(3)   | 4328(3)   | 52.1(10)  |
| F11 | 4760.9(11) | 5852(2)   | 4740(2)   | 43.3(9)   |
| F12 | 4747.0(12) | 6152(3)   | 3338(2)   | 47.2(9)   |
| N3  | 3940.2(14) | 4397(3)   | 4801(2)   | 18.5(8)   |
| N4  | 4016.9(13) | 4724(2)   | 6392(2)   | 15.9(8)   |
| C20 | 4884.7(18) | 6676(4)   | 7012(4)   | 32.3(13)  |
| C21 | 4374.3(17) | 7076(3)   | 6663(3)   | 19.6(10)  |
| C22 | 4320.4(18) | 8016(3)   | 6357(3)   | 24.6(11)  |
| C23 | 3864.8(19) | 8406(3)   | 6076(3)   | 26.9(11)  |
| C24 | 3461.6(18) | 7867(3)   | 6082(3)   | 23.9(11)  |
| C25 | 3516.7(16) | 6907(3)   | 6382(3)   | 17.7(9)   |
| C26 | 3966.5(16) | 6507(3)   | 6688(3)   | 15.3(9)   |
| C27 | 4021.9(17) | 5501(3)   | 7071(3)   | 18.9(9)   |
| C28 | 4083.7(19) | 3777(3)   | 6818(3)   | 26.3(11)  |
| C29 | 3962.2(15) | 4935(3)   | 5521(3)   | 15.0(9)   |
| C30 | 3949(2)    | 3351(3)   | 4754(3)   | 28.1(12)  |
| C31 | 3910.3(19) | 4858(3)   | 3895(3)   | 24.6(11)  |
| C32 | 3747.9(17) | 5892(3)   | 3848(3)   | 19.9(10)  |
| C33 | 3259.1(18) | 6118(4)   | 3724(3)   | 24.2(11)  |
| C34 | 3103.2(19) | 7062(4)   | 3647(3)   | 28.0(11)  |
| C35 | 3428(2)    | 7787(4)   | 3690(3)   | 30.4(12)  |
| C36 | 3914.1(19) | 7596(3)   | 3832(3)   | 25.1(11)  |
| C37 | 4077.3(17) | 6658(3)   | 3913(3)   | 21.6(10)  |
| C38 | 4607.3(19) | 6488(4)   | 4073(4)   | 32.9(12)  |

**Table 3 Anisotropic Displacement Parameters ( $\text{\AA}^2 \times 10^3$ ) for complex\_S1.4. The Anisotropic displacement factor exponent takes the form:  $-2\pi^2 [h^2 a^{*2} U_{11} + 2hka^* b^* U_{12} + \dots]$ .**

| Atom | $U_{11}$  | $U_{22}$  | $U_{33}$  | $U_{23}$  | $U_{13}$ | $U_{12}$ |
|------|-----------|-----------|-----------|-----------|----------|----------|
| Pd1  | 15.01(17) | 15.08(16) | 12.10(15) | -1.06(12) | 2.52(13) | 2.00(13) |
| Pd2  | 15.33(17) | 13.94(16) | 15.56(16) | -1.11(13) | 3.10(13) | 1.73(13) |
| I1   | 22.70(16) | 19.01(15) | 14.38(14) | 1.05(11)  | 0.33(11) | 3.79(12) |
| I2   | 16.35(15) | 27.29(16) | 17.93(14) | -7.13(12) | 3.90(11) | 4.40(12) |
| I3   | 24.62(16) | 23.28(15) | 14.72(14) | -4.50(11) | 0.66(12) | 8.64(13) |
| I4   | 20.33(15) | 20.71(15) | 14.42(14) | -3.07(11) | 0.28(11) | 5.69(12) |

|     |           |           |           |           |          |            |
|-----|-----------|-----------|-----------|-----------|----------|------------|
| I5  | 20.10(15) | 25.61(16) | 24.17(16) | -8.67(13) | 4.74(12) | 4.92(13)   |
| I6  | 21.58(16) | 17.34(14) | 19.69(15) | 2.43(11)  | 0.75(12) | 2.93(12)   |
| I7  | 21.46(16) | 29.39(16) | 20.17(15) | -2.27(13) | 5.26(12) | 2.02(13)   |
| I8  | 25.60(16) | 21.75(15) | 23.61(16) | -1.91(12) | 6.97(13) | -1.03(13)  |
| I9  | 26.71(18) | 49.1(2)   | 22.41(16) | 4.06(15)  | 0.59(13) | -17.74(16) |
| I10 | 21.93(16) | 29.13(17) | 31.20(17) | 0.44(14)  | 9.29(13) | 1.63(13)   |
| F1  | 37.0(18)  | 48(2)     | 26.4(16)  | -6.0(14)  | -6.8(14) | 4.4(15)    |
| F2  | 26.8(16)  | 34.8(17)  | 52(2)     | -7.0(15)  | 5.8(14)  | -10.8(14)  |
| F3  | 22.6(15)  | 28.2(15)  | 29.0(15)  | -6.6(12)  | 3.6(12)  | 3.2(12)    |
| F4  | 20.7(15)  | 28.9(15)  | 29.5(15)  | 12.8(12)  | -0.3(12) | -3.6(12)   |
| F5  | 28.1(16)  | 35.7(17)  | 33.8(16)  | 1.4(13)   | 17.9(13) | 1.9(13)    |
| F6  | 29.8(16)  | 20.0(14)  | 45.8(18)  | 4.4(13)   | 7.0(14)  | -6.8(13)   |
| N1  | 19.6(19)  | 10.6(17)  | 12.9(17)  | 2.6(14)   | 0.8(15)  | 0.5(15)    |
| N2  | 21(2)     | 12.1(17)  | 15.2(18)  | -0.9(14)  | 5.5(15)  | -2.9(15)   |
| C1  | 37(3)     | 28(3)     | 40(3)     | -30(2)    | 25(3)    | -21(2)     |
| C2  | 27(3)     | 18(2)     | 14(2)     | -6.8(18)  | 4.2(18)  | -1(2)      |
| C3  | 33(3)     | 15(2)     | 29(3)     | -4(2)     | 10(2)    | -5(2)      |
| C4  | 46(3)     | 16(2)     | 28(3)     | 4(2)      | 12(2)    | 5(2)       |
| C5  | 27(3)     | 26(3)     | 22(2)     | 2(2)      | 6(2)     | 10(2)      |
| C6  | 24(2)     | 18(2)     | 17(2)     | -2.8(18)  | 8.6(19)  | 1.2(19)    |
| C7  | 27(2)     | 17(2)     | 8.4(19)   | -2.2(16)  | 8.1(18)  | -1.2(19)   |
| C8  | 23(2)     | 16(2)     | 12(2)     | 1.0(17)   | 4.6(18)  | -0.4(18)   |
| C9  | 57(4)     | 19(2)     | 19(2)     | 8(2)      | 13(2)    | 1(2)       |
| C10 | 13(2)     | 14(2)     | 15(2)     | 0.2(17)   | 4.0(17)  | -1.0(17)   |
| C11 | 46(3)     | 12(2)     | 28(3)     | -3(2)     | 14(2)    | -3(2)      |
| C12 | 23(2)     | 22(2)     | 13(2)     | -2.4(18)  | 4.6(18)  | -7.3(19)   |
| C13 | 23(2)     | 23(2)     | 6.3(19)   | 1.3(17)   | 3.3(17)  | -0.6(19)   |
| C14 | 21(2)     | 28(3)     | 12(2)     | 4.4(19)   | 3.1(18)  | -4(2)      |
| C15 | 19(3)     | 51(3)     | 24(3)     | 5(2)      | 2(2)     | 8(2)       |
| C16 | 38(3)     | 31(3)     | 24(3)     | 8(2)      | 8(2)     | 12(2)      |
| C17 | 31(3)     | 24(2)     | 21(2)     | 5(2)      | 8(2)     | 6(2)       |
| C18 | 23(2)     | 24(2)     | 9(2)      | 3.3(17)   | 6.9(18)  | 4(2)       |
| C19 | 26(3)     | 18(2)     | 21(2)     | 2.5(19)   | 9(2)     | -3(2)      |
| I11 | 20.53(16) | 28.77(17) | 29.23(17) | -3.70(13) | 6.94(13) | -1.86(13)  |
| I12 | 43.3(2)   | 60.5(3)   | 25.69(18) | -1.31(17) | 0.85(16) | -31.3(2)   |
| F7  | 28.1(17)  | 51(2)     | 39.6(19)  | -0.7(16)  | -7.9(14) | 4.8(15)    |
| F8  | 24.1(16)  | 46(2)     | 60(2)     | -10.5(17) | 11.5(15) | -10.5(15)  |
| F9  | 24.3(16)  | 32.9(17)  | 48.6(19)  | -12.9(14) | 7.0(14)  | 5.0(13)    |
| F10 | 33.0(19)  | 48(2)     | 71(2)     | 19.3(19)  | 2.8(17)  | -15.7(17)  |
| F11 | 26.2(17)  | 53(2)     | 49(2)     | 33.0(17)  | 4.5(14)  | 7.6(15)    |
| F12 | 39.8(19)  | 59(2)     | 52(2)     | 21.6(18)  | 29.7(17) | 17.0(17)   |
| N3  | 29(2)     | 11.2(18)  | 17.2(19)  | -1.2(15)  | 10.3(16) | -1.9(16)   |

|     |       |          |          |          |         |          |
|-----|-------|----------|----------|----------|---------|----------|
| N4  | 21(2) | 11.0(17) | 15.1(18) | -1.5(14) | 2.3(15) | -1.9(15) |
| C20 | 25(3) | 34(3)    | 44(3)    | -29(3)   | 21(2)   | -16(2)   |
| C21 | 22(2) | 20(2)    | 17(2)    | -7.1(18) | 5.2(18) | -2.3(19) |
| C22 | 31(3) | 18(2)    | 27(3)    | -5(2)    | 10(2)   | -7(2)    |
| C23 | 39(3) | 14(2)    | 29(3)    | 1(2)     | 12(2)   | -1(2)    |
| C24 | 29(3) | 23(2)    | 20(2)    | -0.2(19) | 7(2)    | 12(2)    |
| C25 | 21(2) | 21(2)    | 11(2)    | -2.0(17) | 4.8(18) | 0.4(19)  |
| C26 | 18(2) | 17(2)    | 12(2)    | -2.3(17) | 6.0(17) | 2.3(18)  |
| C27 | 27(3) | 17(2)    | 11(2)    | -1.0(17) | 1.1(18) | -0.4(19) |
| C28 | 37(3) | 17(2)    | 22(2)    | 5.9(19)  | 0(2)    | 2(2)     |
| C29 | 18(2) | 10(2)    | 18(2)    | 0.8(17)  | 6.4(18) | 0.7(17)  |
| C30 | 48(3) | 11(2)    | 28(3)    | -5.7(19) | 15(2)   | -3(2)    |
| C31 | 44(3) | 16(2)    | 17(2)    | -1.2(18) | 13(2)   | 2(2)     |
| C32 | 30(3) | 18(2)    | 11(2)    | 2.2(17)  | 2.8(19) | -1(2)    |
| C33 | 27(3) | 32(3)    | 12(2)    | 2.7(19)  | 1.8(19) | -6(2)    |
| C34 | 27(3) | 36(3)    | 22(2)    | 5(2)     | 5(2)    | 8(2)     |
| C35 | 50(3) | 21(3)    | 24(3)    | 7(2)     | 15(2)   | 13(2)    |
| C36 | 38(3) | 18(2)    | 20(2)    | 5.4(19)  | 7(2)    | -1(2)    |
| C37 | 27(3) | 23(2)    | 15(2)    | 5.5(19)  | 6.5(19) | 1(2)     |
| C38 | 31(3) | 36(3)    | 33(3)    | 15(2)    | 9(2)    | 0(2)     |

**Table 4 Bond Lengths for complex\_S1.4.**

| Atom | Atom            | Length/Å  | Atom | Atom | Length/Å |
|------|-----------------|-----------|------|------|----------|
| Pd1  | I1              | 2.5891(5) | C14  | C15  | 1.379(7) |
| Pd1  | I2              | 2.5994(5) | C15  | C16  | 1.384(8) |
| Pd1  | I3              | 2.5916(5) | C16  | C17  | 1.371(7) |
| Pd1  | I4              | 2.5996(5) | C17  | C18  | 1.390(6) |
| Pd2  | I3              | 2.6004(5) | C18  | C19  | 1.502(6) |
| Pd2  | I4              | 2.5965(5) | I11  | C25  | 2.106(5) |
| Pd2  | I5              | 2.5967(5) | I12  | C33  | 2.095(5) |
| Pd2  | I6              | 2.5934(5) | F7   | C20  | 1.273(6) |
| I7   | I7 <sup>1</sup> | 2.7460(8) | F8   | C20  | 1.348(6) |
| I8   | I8 <sup>2</sup> | 2.7560(8) | F9   | C20  | 1.329(5) |
| I9   | C14             | 2.104(5)  | F10  | C38  | 1.345(6) |
| I10  | C6              | 2.107(5)  | F11  | C38  | 1.340(6) |
| F1   | C1              | 1.281(6)  | F12  | C38  | 1.332(6) |
| F2   | C1              | 1.355(6)  | N3   | C29  | 1.305(5) |
| F3   | C1              | 1.322(5)  | N3   | C30  | 1.463(5) |
| F4   | C19             | 1.346(5)  | N3   | C31  | 1.489(6) |
| F5   | C19             | 1.341(5)  | N4   | C27  | 1.486(5) |

|     |     |          |     |     |          |
|-----|-----|----------|-----|-----|----------|
| F6  | C19 | 1.338(5) | N4  | C28 | 1.464(5) |
| N1  | C8  | 1.487(5) | N4  | C29 | 1.314(5) |
| N1  | C9  | 1.467(5) | C20 | C21 | 1.535(7) |
| N1  | C10 | 1.308(5) | C21 | C22 | 1.389(6) |
| N2  | C10 | 1.306(5) | C21 | C26 | 1.410(6) |
| N2  | C11 | 1.473(5) | C22 | C23 | 1.382(7) |
| N2  | C12 | 1.483(5) | C23 | C24 | 1.370(7) |
| C1  | C2  | 1.549(7) | C24 | C25 | 1.414(6) |
| C2  | C3  | 1.375(6) | C25 | C26 | 1.378(6) |
| C2  | C7  | 1.421(6) | C26 | C27 | 1.513(6) |
| C3  | C4  | 1.393(7) | C31 | C32 | 1.513(6) |
| C4  | C5  | 1.376(7) | C32 | C33 | 1.394(7) |
| C5  | C6  | 1.400(6) | C32 | C37 | 1.410(6) |
| C6  | C7  | 1.385(6) | C33 | C34 | 1.388(7) |
| C7  | C8  | 1.501(6) | C34 | C35 | 1.362(7) |
| C12 | C13 | 1.517(6) | C35 | C36 | 1.373(7) |
| C13 | C14 | 1.391(6) | C36 | C37 | 1.387(6) |
| C13 | C18 | 1.396(6) | C37 | C38 | 1.489(7) |

<sup>1</sup>-X,1-Y,1-Z; <sup>2</sup>1-X,2-Y,1-Z

**Table 5 Bond Angles for complex\_S1.4.**

| Atom | Atom | Atom | Angle/°     | Atom | Atom | Atom | Angle/°  |
|------|------|------|-------------|------|------|------|----------|
| I1   | Pd1  | I2   | 93.815(18)  | C17  | C18  | C19  | 117.3(4) |
| I1   | Pd1  | I3   | 90.043(18)  | F4   | C19  | C18  | 112.7(4) |
| I1   | Pd1  | I4   | 176.602(17) | F5   | C19  | F4   | 105.9(4) |
| I2   | Pd1  | I4   | 89.471(18)  | F5   | C19  | C18  | 113.0(4) |
| I3   | Pd1  | I2   | 176.015(17) | F6   | C19  | F4   | 105.4(4) |
| I3   | Pd1  | I4   | 86.656(18)  | F6   | C19  | F5   | 106.6(4) |
| I4   | Pd2  | I3   | 86.536(18)  | F6   | C19  | C18  | 112.6(4) |
| I5   | Pd2  | I3   | 89.453(18)  | C29  | N3   | C30  | 128.1(4) |
| I5   | Pd2  | I4   | 174.013(17) | C29  | N3   | C31  | 119.2(4) |
| I6   | Pd2  | I3   | 176.518(17) | C30  | N3   | C31  | 112.7(3) |
| I6   | Pd2  | I4   | 90.075(18)  | C28  | N4   | C27  | 112.3(3) |
| I6   | Pd2  | I5   | 93.988(19)  | C29  | N4   | C27  | 119.8(3) |
| Pd1  | I3   | Pd2  | 93.401(18)  | C29  | N4   | C28  | 127.8(4) |
| Pd2  | I4   | Pd1  | 93.305(18)  | F7   | C20  | F8   | 108.2(4) |
| C9   | N1   | C8   | 112.9(3)    | F7   | C20  | F9   | 109.1(5) |
| C10  | N1   | C8   | 119.5(3)    | F7   | C20  | C21  | 112.4(4) |
| C10  | N1   | C9   | 127.5(4)    | F8   | C20  | C21  | 109.6(5) |
| C10  | N2   | C11  | 127.7(4)    | F9   | C20  | F8   | 106.0(4) |



|     |     |     |          |     |     |     |          |
|-----|-----|-----|----------|-----|-----|-----|----------|
| C10 | N2  | C12 | 118.7(4) | F9  | C20 | C21 | 111.3(4) |
| C11 | N2  | C12 | 113.6(3) | C22 | C21 | C20 | 119.1(4) |
| F1  | C1  | F2  | 109.0(4) | C22 | C21 | C26 | 120.6(4) |
| F1  | C1  | F3  | 109.7(5) | C26 | C21 | C20 | 120.3(4) |
| F1  | C1  | C2  | 112.3(4) | C23 | C22 | C21 | 120.2(5) |
| F2  | C1  | C2  | 108.7(4) | C24 | C23 | C22 | 120.6(4) |
| F3  | C1  | F2  | 105.8(4) | C23 | C24 | C25 | 119.2(4) |
| F3  | C1  | C2  | 111.2(4) | C24 | C25 | I11 | 116.9(3) |
| C3  | C2  | C1  | 119.2(4) | C26 | C25 | I11 | 121.6(3) |
| C3  | C2  | C7  | 121.1(4) | C26 | C25 | C24 | 121.5(4) |
| C7  | C2  | C1  | 119.7(4) | C21 | C26 | C27 | 121.0(4) |
| C2  | C3  | C4  | 120.0(5) | C25 | C26 | C21 | 117.9(4) |
| C5  | C4  | C3  | 120.2(4) | C25 | C26 | C27 | 121.1(4) |
| C4  | C5  | C6  | 119.5(5) | N4  | C27 | C26 | 115.7(3) |
| C5  | C6  | I10 | 117.2(3) | N3  | C29 | N4  | 131.8(4) |
| C7  | C6  | I10 | 121.1(3) | N3  | C31 | C32 | 114.4(4) |
| C7  | C6  | C5  | 121.8(4) | C33 | C32 | C31 | 120.4(4) |
| C2  | C7  | C8  | 121.7(4) | C33 | C32 | C37 | 117.5(4) |
| C6  | C7  | C2  | 117.3(4) | C37 | C32 | C31 | 122.1(4) |
| C6  | C7  | C8  | 121.0(4) | C32 | C33 | I12 | 121.1(4) |
| N1  | C8  | C7  | 115.6(3) | C34 | C33 | I12 | 117.7(4) |
| N2  | C10 | N1  | 131.8(4) | C34 | C33 | C32 | 121.1(5) |
| N2  | C12 | C13 | 114.6(3) | C35 | C34 | C33 | 120.2(5) |
| C14 | C13 | C12 | 119.2(4) | C34 | C35 | C36 | 120.6(5) |
| C14 | C13 | C18 | 117.5(4) | C35 | C36 | C37 | 120.1(5) |
| C18 | C13 | C12 | 123.3(4) | C32 | C37 | C38 | 121.4(4) |
| C13 | C14 | I9  | 120.8(3) | C36 | C37 | C32 | 120.5(4) |
| C15 | C14 | I9  | 117.9(4) | C36 | C37 | C38 | 118.1(4) |
| C15 | C14 | C13 | 121.3(4) | F10 | C38 | C37 | 112.1(5) |
| C14 | C15 | C16 | 120.1(5) | F11 | C38 | F10 | 105.8(4) |
| C17 | C16 | C15 | 120.1(5) | F11 | C38 | C37 | 112.5(4) |
| C16 | C17 | C18 | 119.6(5) | F12 | C38 | F10 | 107.0(4) |
| C13 | C18 | C19 | 121.3(4) | F12 | C38 | F11 | 106.0(4) |
| C17 | C18 | C13 | 121.4(4) | F12 | C38 | C37 | 113.0(4) |

## Complex\_15

molecular structure complex\_15 with 40% ellipsoids

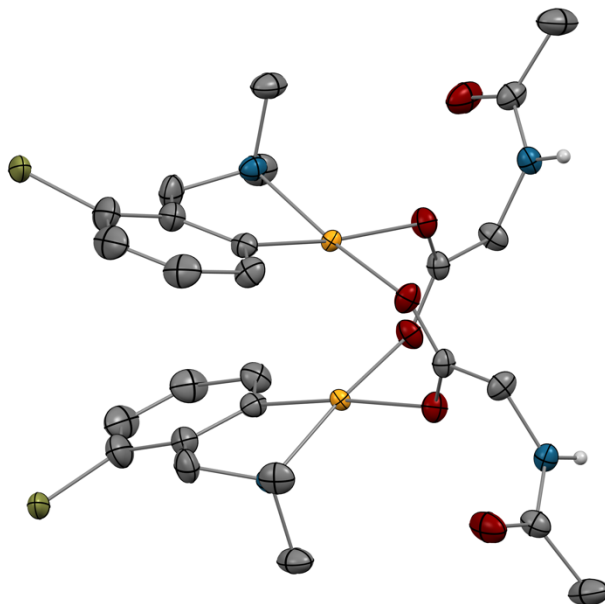

asymmetric unit complex\_15 with 40% ellipsoids

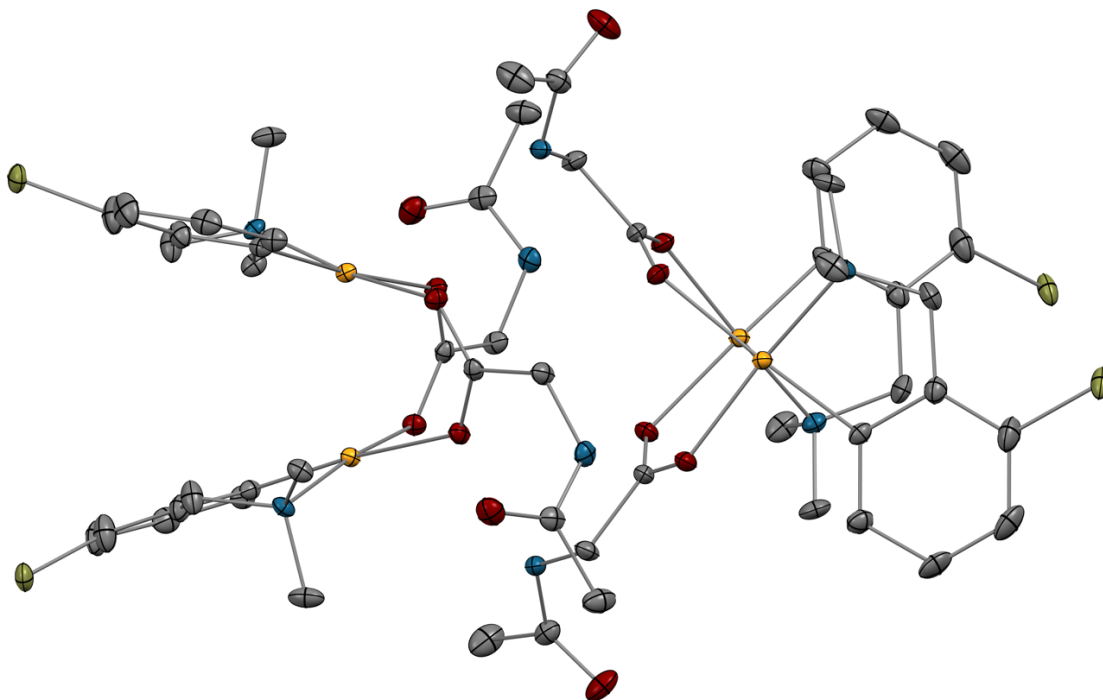

unit cell complex\_15 with hydrogen bonding network

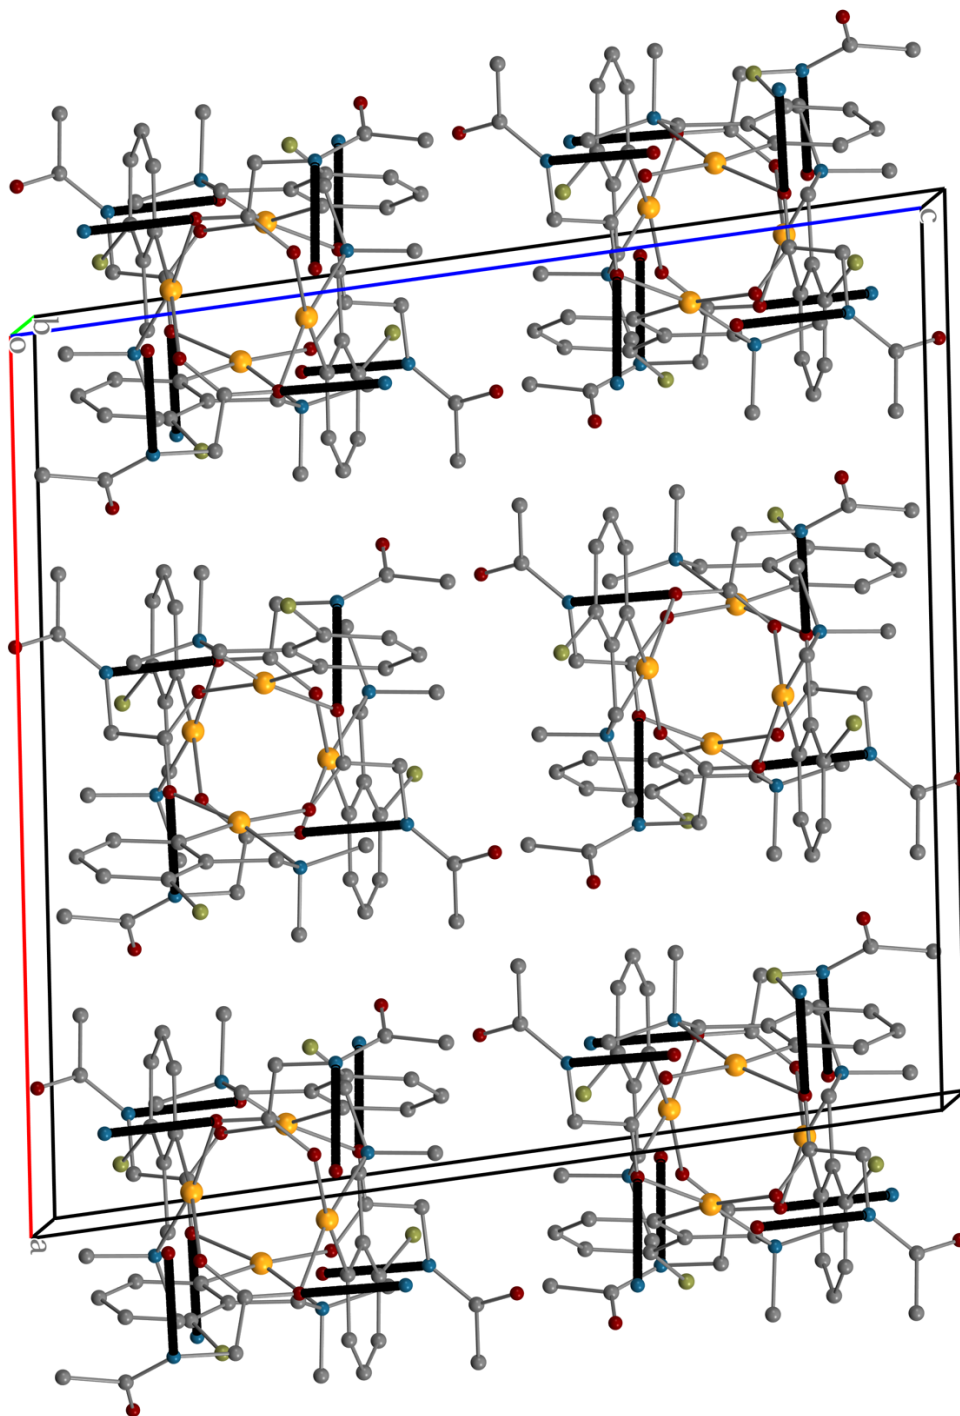

**Table 1 Crystal data and structure refinement for complex\_15.**

|                                             |                                                                                 |
|---------------------------------------------|---------------------------------------------------------------------------------|
| Identification code                         | complex_15                                                                      |
| Empirical formula                           | C <sub>26</sub> H <sub>35</sub> ClN <sub>4</sub> O <sub>6</sub> Pd <sub>2</sub> |
| Formula weight                              | 747.83                                                                          |
| Temperature/K                               | 100(2)                                                                          |
| Crystal system                              | monoclinic                                                                      |
| Space group                                 | C2/c                                                                            |
| a/Å                                         | 19.2982(5)                                                                      |
| b/Å                                         | 16.4180(5)                                                                      |
| c/Å                                         | 19.7030(6)                                                                      |
| α/°                                         | 90                                                                              |
| β/°                                         | 96.7390(10)                                                                     |
| γ/°                                         | 90                                                                              |
| Volume/Å <sup>3</sup>                       | 6199.5(3)                                                                       |
| Z                                           | 8                                                                               |
| ρ <sub>calc</sub> /g/cm <sup>3</sup>        | 1.602                                                                           |
| μ/mm <sup>-1</sup>                          | 1.630                                                                           |
| F(000)                                      | 3008.0                                                                          |
| Crystal size/mm <sup>3</sup>                | 0.04 × 0.03 × 0.02                                                              |
| Radiation                                   | synchrotron (λ = 0.41328)                                                       |
| 2θ range for data collection/°              | 2.172 to 37.75                                                                  |
| Index ranges                                | -29 ≤ h ≤ 22, -25 ≤ k ≤ 25, -30 ≤ l ≤ 30                                        |
| Reflections collected                       | 85500                                                                           |
| Independent reflections                     | 12148 [R <sub>int</sub> = 0.1001, R <sub>sigma</sub> = 0.0708]                  |
| Data/restraints/parameters                  | 12148/2/373                                                                     |
| Goodness-of-fit on F <sup>2</sup>           | 1.022                                                                           |
| Final R indexes [I >= 2σ (I)]               | R <sub>1</sub> = 0.0402, wR <sub>2</sub> = 0.0831                               |
| Final R indexes [all data]                  | R <sub>1</sub> = 0.0663, wR <sub>2</sub> = 0.0921                               |
| Largest diff. peak/hole / e Å <sup>-3</sup> | 1.06/-1.09                                                                      |

$$R_{\text{int}} = \frac{\sum |F_o^2 - \langle F_o^2 \rangle|}{\sum |F_o^2|}$$

$$R_1 = \frac{\sum ||F_o| - |F_c||}{\sum |F_o|}$$

$$wR_2 = \left[ \frac{\sum [w(F_o^2 - F_c^2)^2]}{\sum [w(F_o^2)^2]} \right]^{1/2}$$

$$\text{Goodness-of-fit} = \left[ \frac{\sum [w(F_o^2 - F_c^2)^2]}{(n-p)} \right]^{1/2}$$

n: number of independent reflections; p: number of refined parameters

**Table 2 Fractional Atomic Coordinates (×104) and Equivalent Isotropic Displacement Parameters (Å<sup>2</sup>×103) for complex\_15. U<sub>eq</sub> is defined as 1/3 of the trace of the orthogonalised U<sub>ij</sub> tensor.**

| Atom | x | y | z | U(eq) |
|------|---|---|---|-------|
|------|---|---|---|-------|

|     |            |             |            |          |
|-----|------------|-------------|------------|----------|
| Pd1 | 5750.2(2)  | 8700.1(2)   | 7345.5(2)  | 17.32(5) |
| Cl1 | 6622.9(7)  | 11856.6(8)  | 6981.1(8)  | 31.5(3)  |
| O1  | 5322.9(10) | 7951.3(11)  | 6573.3(9)  | 24.0(4)  |
| O2  | 4263.4(10) | 7737.3(11)  | 6911.3(9)  | 23.8(4)  |
| O3  | 3494.0(12) | 7254.4(14)  | 4900.7(11) | 39.7(5)  |
| N1  | 6330.3(11) | 9460.9(14)  | 8022.3(11) | 22.3(4)  |
| N2  | 3928.9(12) | 6621.3(14)  | 5872.9(11) | 20.7(4)  |
| C1  | 5861.9(14) | 9592.5(16)  | 6703.4(13) | 21.9(5)  |
| C2  | 5738.5(15) | 9553.3(19)  | 5989.3(14) | 28.9(6)  |
| C3  | 5849.8(18) | 10245(2)    | 5601.5(17) | 38.5(8)  |
| C4  | 6091.5(18) | 10955(2)    | 5905.5(19) | 44.5(9)  |
| C5  | 6229.3(18) | 10992(2)    | 6620.1(19) | 40.7(8)  |
| C6  | 6104.6(16) | 10319.5(17) | 7016.1(15) | 28.3(6)  |
| C7  | 6196.9(18) | 10312.6(17) | 7784.4(15) | 32.6(7)  |
| C8  | 7074.5(15) | 9249(2)     | 7987.7(17) | 35.8(7)  |
| C9  | 6188.8(16) | 9393(2)     | 8745.9(13) | 31.1(6)  |
| C10 | 4724.3(14) | 7620.3(15)  | 6526.7(12) | 19.7(5)  |
| C11 | 4593.0(14) | 7036.9(17)  | 5927.5(13) | 24.1(5)  |
| C12 | 3423.2(15) | 6766.9(18)  | 5358.5(14) | 26.7(6)  |
| C13 | 2773.1(17) | 6259(2)     | 5364.8(19) | 43.4(9)  |
| Pd2 | 5256.5(2)  | 4768.6(2)   | 8238.6(2)  | 15.86(5) |
| Cl2 | 5616.9(8)  | 1568.2(8)   | 9091.4(7)  | 27.5(3)  |
| O4  | 6018.1(9)  | 5519.0(11)  | 7933.7(9)  | 20.8(4)  |
| O5  | 5498.8(9)  | 5737.7(11)  | 6862.4(9)  | 20.2(4)  |
| O6  | 7042.9(11) | 5777.3(13)  | 6091.7(11) | 33.5(5)  |
| N3  | 4595.1(11) | 3993.8(13)  | 8677.3(10) | 19.1(4)  |
| N4  | 6496.3(12) | 6810.0(14)  | 6577.4(12) | 23.2(5)  |
| C14 | 5914.1(13) | 3861.7(16)  | 8424.6(12) | 19.5(5)  |
| C15 | 6638.5(13) | 3890.3(17)  | 8425.2(13) | 23.0(5)  |
| C16 | 7034.1(15) | 3185.6(19)  | 8560.0(15) | 30.8(6)  |
| C17 | 6719.1(17) | 2457.2(19)  | 8708.7(18) | 38.9(8)  |
| C18 | 6001.1(17) | 2437.1(19)  | 8728.1(19) | 39.8(8)  |
| C19 | 5597.6(15) | 3126.9(17)  | 8577.7(15) | 26.5(6)  |
| C20 | 4820.1(15) | 3140.7(17)  | 8552.8(17) | 31.8(7)  |
| C21 | 3840.3(13) | 4072.3(17)  | 8443.3(13) | 22.4(5)  |
| C22 | 4702.1(15) | 4175(2)     | 9421.1(13) | 32.4(7)  |
| C23 | 5968.3(13) | 5850.9(15)  | 7346.4(12) | 18.7(5)  |
| C24 | 6561.2(14) | 6436.2(17)  | 7244.9(13) | 23.2(5)  |
| C25 | 6711.3(14) | 6419.2(18)  | 6036.8(14) | 25.5(6)  |
| C26 | 6550.9(17) | 6849(2)     | 5360.9(15) | 36.8(7)  |

**Table 3 Anisotropic Displacement Parameters ( $\text{\AA}^2 \times 10^3$ ) for complex\_15. The Anisotropic displacement factor exponent takes the form:  $-2\pi^2[h^2a^{*2}U_{11}+2hka^*b^*U_{12}+\dots]$ .**

| Atom | $U_{11}$  | $U_{22}$ | $U_{33}$ | $U_{23}$  | $U_{13}$ | $U_{12}$  |
|------|-----------|----------|----------|-----------|----------|-----------|
| Pd1  | 20.33(10) | 18.37(9) | 13.29(8) | -0.04(6)  | 2.13(6)  | -2.21(7)  |
| Cl1  | 27.0(7)   | 16.4(6)  | 48.3(9)  | 6.8(6)    | -6.7(6)  | -2.3(5)   |
| O1   | 31.4(11)  | 23.6(9)  | 17.0(8)  | -3.9(7)   | 2.4(7)   | -6.0(8)   |
| O2   | 30.4(11)  | 22.7(9)  | 18.8(9)  | -5.5(7)   | 4.5(7)   | -0.7(8)   |
| O3   | 33.6(13)  | 46.0(14) | 39.6(12) | 22.5(11)  | 4.2(9)   | 7.1(10)   |
| N1   | 20.4(11)  | 26.2(11) | 19.9(10) | -3.8(9)   | 0.6(8)   | -1.6(9)   |
| N2   | 25.3(12)  | 20.1(11) | 16.1(10) | 0.7(8)    | 0.6(8)   | -2.9(8)   |
| C1   | 19.8(13)  | 24.2(13) | 22.0(12) | 5.5(10)   | 4.6(9)   | -0.5(10)  |
| C2   | 30.4(16)  | 33.2(15) | 24.0(13) | 4.8(11)   | 6.6(11)  | -4.8(12)  |
| C3   | 36.4(18)  | 50(2)    | 30.7(16) | 19.2(14)  | 11.1(13) | -3.2(15)  |
| C4   | 38.5(19)  | 44(2)    | 52(2)    | 26.9(17)  | 10.8(16) | -4.4(15)  |
| C5   | 41(2)     | 25.2(16) | 55(2)    | 10.1(14)  | 2.0(16)  | -7.6(13)  |
| C6   | 29.2(16)  | 22.9(14) | 32.5(15) | 2.5(11)   | 1.7(12)  | -3.2(11)  |
| C7   | 43.1(18)  | 20.2(14) | 33.9(16) | -9.0(11)  | 1.6(13)  | -4.5(12)  |
| C8   | 19.4(14)  | 47.2(19) | 40.6(17) | -13.4(15) | 2.4(12)  | -0.2(13)  |
| C9   | 33.7(16)  | 43.5(18) | 15.7(12) | -9.3(11)  | 0.9(11)  | -2.1(13)  |
| C10  | 27.2(14)  | 16.9(11) | 14.9(10) | -2.0(9)   | 1.7(9)   | -0.9(9)   |
| C11  | 27.3(14)  | 28.2(14) | 16.9(11) | -6.1(10)  | 3.4(10)  | -5.4(11)  |
| C12  | 26.0(14)  | 29.7(15) | 24.9(13) | 4.8(11)   | 5.5(11)  | 4.1(11)   |
| C13  | 24.0(17)  | 59(2)    | 46(2)    | 17.3(17)  | -1.1(14) | -6.8(15)  |
| Pd2  | 14.57(9)  | 18.14(9) | 15.10(8) | 1.40(6)   | 2.74(6)  | 2.53(6)   |
| Cl2  | 32.4(7)   | 14.5(6)  | 36.2(7)  | 0.7(5)    | 6.1(6)   | 4.7(5)    |
| O4   | 19.0(9)   | 23.5(9)  | 20.5(9)  | 0.9(7)    | 4.7(7)   | -1.4(7)   |
| O5   | 19.3(9)   | 21.7(9)  | 19.7(8)  | -1.9(7)   | 2.9(7)   | -6.3(7)   |
| O6   | 32.1(12)  | 35.3(12) | 34.7(11) | -4.6(9)   | 11.0(9)  | -1.0(9)   |
| N3   | 16.1(10)  | 21.7(10) | 19.4(10) | 5.3(8)    | 1.3(8)   | 2.5(8)    |
| N4   | 19.8(11)  | 22.6(11) | 27.7(11) | 0.9(9)    | 5.0(9)   | -6.3(8)   |
| C14  | 17.7(12)  | 23.5(12) | 16.9(11) | -2.5(9)   | -0.1(9)  | 5.8(9)    |
| C15  | 16.9(13)  | 29.5(14) | 22.6(12) | -1(1)     | 2.7(9)   | 4.5(10)   |
| C16  | 21.3(14)  | 39.9(17) | 30.2(14) | -4.2(13)  | -0.8(11) | 10.6(12)  |
| C17  | 32.1(18)  | 27.4(16) | 55(2)    | -3.8(14)  | -3.9(14) | 14.4(13)  |
| C18  | 29.5(17)  | 24.5(15) | 64(2)    | 3.1(15)   | -0.7(15) | 4.2(12)   |
| C19  | 23.9(14)  | 21.5(13) | 32.8(15) | -2.8(11)  | -1.4(11) | 5.3(10)   |
| C20  | 20.7(14)  | 20.4(13) | 52.3(19) | 1.6(13)   | -4.7(12) | -0.5(10)  |
| C21  | 15.3(12)  | 28.1(14) | 23.7(12) | 4.8(10)   | 2.1(9)   | 1.1(10)   |
| C22  | 25.8(15)  | 54(2)    | 17.6(12) | 4.5(12)   | 2.4(10)  | -7.4(13)  |
| C23  | 19.2(12)  | 17.0(11) | 20.8(11) | -2.1(9)   | 6.6(9)   | -0.2(9)   |
| C24  | 22.4(14)  | 26.8(14) | 20.9(12) | -2.1(10)  | 4.3(10)  | -8.5(10)  |
| C25  | 19.7(14)  | 32.3(15) | 24.8(13) | -0.8(11)  | 3.6(10)  | -10.4(11) |

C26      31.0(17)      52(2)      26.9(15)      5.5(14)      1.8(12)      -9.9(14)

**Table 4 Bond Lengths for complex\_15.**

| Atom | Atom             | Length/Å   | Atom | Atom             | Length/Å   |
|------|------------------|------------|------|------------------|------------|
| Pd1  | Pd1 <sup>1</sup> | 3.0279(4)  | Pd2  | Pd2 <sup>1</sup> | 2.9621(4)  |
| Pd1  | O1               | 2.0522(18) | Pd2  | O4               | 2.0606(18) |
| Pd1  | O2 <sup>1</sup>  | 2.1571(17) | Pd2  | O5 <sup>1</sup>  | 2.1512(17) |
| Pd1  | N1               | 2.060(2)   | Pd2  | N3               | 2.063(2)   |
| Pd1  | C1               | 1.964(3)   | Pd2  | C14              | 1.963(2)   |
| Cl1  | C5               | 1.724(4)   | Cl2  | C18              | 1.795(4)   |
| O1   | C10              | 1.270(3)   | O4   | C23              | 1.272(3)   |
| O2   | C10              | 1.249(3)   | O5   | C23              | 1.250(3)   |
| O3   | C12              | 1.225(3)   | O6   | C25              | 1.231(4)   |
| N1   | C7               | 1.487(4)   | N3   | C20              | 1.495(4)   |
| N1   | C8               | 1.487(4)   | N3   | C21              | 1.481(3)   |
| N1   | C9               | 1.487(3)   | N3   | C22              | 1.486(3)   |
| N2   | C11              | 1.445(3)   | N4   | C24              | 1.443(3)   |
| N2   | C12              | 1.343(3)   | N4   | C25              | 1.350(4)   |
| C1   | C2               | 1.401(4)   | C14  | C15              | 1.399(4)   |
| C1   | C6               | 1.398(4)   | C14  | C19              | 1.401(4)   |
| C2   | C3               | 1.399(4)   | C15  | C16              | 1.394(4)   |
| C3   | C4               | 1.367(5)   | C16  | C17              | 1.388(5)   |
| C4   | C5               | 1.403(5)   | C17  | C18              | 1.391(5)   |
| C5   | C6               | 1.389(4)   | C18  | C19              | 1.387(4)   |
| C6   | C7               | 1.503(4)   | C19  | C20              | 1.496(4)   |
| C10  | C11              | 1.518(3)   | C23  | C24              | 1.525(3)   |
| C12  | C13              | 1.508(4)   | C25  | C26              | 1.507(4)   |

<sup>1</sup>1-X,+Y,3/2-Z

**Table 5 Bond Angles for complex\_15.**

| Atom            | Atom | Atom             | Angle/°   | Atom            | Atom | Atom             | Angle/°   |
|-----------------|------|------------------|-----------|-----------------|------|------------------|-----------|
| O1              | Pd1  | Pd1 <sup>1</sup> | 80.71(5)  | O4              | Pd2  | Pd2 <sup>1</sup> | 83.18(5)  |
| O1              | Pd1  | O2 <sup>1</sup>  | 91.63(7)  | O4              | Pd2  | O5 <sup>1</sup>  | 91.70(7)  |
| O1              | Pd1  | N1               | 169.72(8) | O4              | Pd2  | N3               | 171.35(8) |
| O2 <sup>1</sup> | Pd1  | Pd1 <sup>1</sup> | 77.02(5)  | O5 <sup>1</sup> | Pd2  | Pd2 <sup>1</sup> | 76.37(5)  |
| N1              | Pd1  | Pd1 <sup>1</sup> | 109.26(6) | N3              | Pd2  | Pd2 <sup>1</sup> | 105.06(6) |
| N1              | Pd1  | O2 <sup>1</sup>  | 93.09(8)  | N3              | Pd2  | O5 <sup>1</sup>  | 92.80(8)  |
| C1              | Pd1  | Pd1 <sup>1</sup> | 108.02(8) | C14             | Pd2  | Pd2 <sup>1</sup> | 108.53(7) |

|     |     |                  |            |     |     |                  |            |
|-----|-----|------------------|------------|-----|-----|------------------|------------|
| C1  | Pd1 | O1               | 91.96(10)  | C14 | Pd2 | O4               | 92.32(9)   |
| C1  | Pd1 | O2 <sup>1</sup>  | 174.23(10) | C14 | Pd2 | O5 <sup>1</sup>  | 174.01(9)  |
| C1  | Pd1 | N1               | 82.65(10)  | C14 | Pd2 | N3               | 82.66(10)  |
| C10 | O1  | Pd1              | 126.35(16) | C23 | O4  | Pd2              | 122.73(16) |
| C10 | O2  | Pd1 <sup>1</sup> | 126.20(17) | C23 | O5  | Pd2 <sup>1</sup> | 127.10(16) |
| C7  | N1  | Pd1              | 107.77(16) | C20 | N3  | Pd2              | 107.64(16) |
| C7  | N1  | C8               | 109.7(2)   | C21 | N3  | Pd2              | 116.76(15) |
| C7  | N1  | C9               | 109.1(2)   | C21 | N3  | C20              | 108.9(2)   |
| C8  | N1  | Pd1              | 106.45(17) | C21 | N3  | C22              | 107.9(2)   |
| C8  | N1  | C9               | 108.3(2)   | C22 | N3  | Pd2              | 105.58(17) |
| C9  | N1  | Pd1              | 115.37(17) | C22 | N3  | C20              | 109.9(2)   |
| C12 | N2  | C11              | 122.1(2)   | C25 | N4  | C24              | 121.0(2)   |
| C2  | C1  | Pd1              | 126.4(2)   | C15 | C14 | Pd2              | 126.8(2)   |
| C6  | C1  | Pd1              | 114.2(2)   | C15 | C14 | C19              | 119.3(2)   |
| C6  | C1  | C2               | 119.4(2)   | C19 | C14 | Pd2              | 113.88(19) |
| C3  | C2  | C1               | 119.5(3)   | C16 | C15 | C14              | 119.8(3)   |
| C4  | C3  | C2               | 121.3(3)   | C17 | C16 | C15              | 120.8(3)   |
| C3  | C4  | C5               | 119.4(3)   | C16 | C17 | C18              | 119.2(3)   |
| C4  | C5  | C11              | 118.2(3)   | C17 | C18 | C12              | 119.3(2)   |
| C6  | C5  | C11              | 121.3(3)   | C19 | C18 | C12              | 119.1(3)   |
| C6  | C5  | C4               | 120.3(3)   | C19 | C18 | C17              | 120.7(3)   |
| C1  | C6  | C7               | 115.5(2)   | C14 | C19 | C20              | 116.2(2)   |
| C5  | C6  | C1               | 120.1(3)   | C18 | C19 | C14              | 120.1(3)   |
| C5  | C6  | C7               | 124.3(3)   | C18 | C19 | C20              | 123.7(3)   |
| N1  | C7  | C6               | 108.7(2)   | N3  | C20 | C19              | 108.6(2)   |
| O1  | C10 | C11              | 113.2(2)   | O4  | C23 | C24              | 114.3(2)   |
| O2  | C10 | O1               | 126.6(2)   | O5  | C23 | O4               | 126.9(2)   |
| O2  | C10 | C11              | 120.2(2)   | O5  | C23 | C24              | 118.8(2)   |
| N2  | C11 | C10              | 114.9(2)   | N4  | C24 | C23              | 113.7(2)   |
| O3  | C12 | N2               | 122.5(3)   | O6  | C25 | N4               | 122.8(3)   |
| O3  | C12 | C13              | 122.1(3)   | O6  | C25 | C26              | 122.0(3)   |
| N2  | C12 | C13              | 115.3(2)   | N4  | C25 | C26              | 115.1(3)   |



## References

- (1) Powers, D. C.; Ritter, T. *Nature Chemistry* **2009**, 1 (4), 302.
- (2) Jones, T. C.; Nielson, A. J.; Rickard, C. E. *Australian Journal of chemistry* **1984**, 37, 2179.
- (3) Cope, A. C.; Friedrich, E. C. *J. Am. Chem. Soc.* **1968**, 90 (4), 909.
- (4) Pfeffer, M. *Inorganic Syntheses* **1989**, 26, 211.
- (5) Diaz-de-Villegas. *Journal of Organometallic Chemistry* **1995**, 490, 35.
- (6) Hiraki, K.; Fuchita, Y.; Pfeffer, M. *Inorganic Syntheses*. Vol. 26, **1989**, pp 208-211.
- (7) Milani, J.; Pridmore, N. E.; Whitwood, A. C.; Fairlamb, I. J. S.; Perutz, R. N. *Organometallics* **2015**, 34 (17), 4376.
- (8) Tayama, E.; Kimura, H. *Angew. Chem. Int. Ed.* **2007**, 46 (46), 8869.
- (9) Deprez, N. R.; Sanford, M. S. *J. Am. Chem. Soc.* **2009**, 131 (31), 11234.
- (10) Powers, D. C.; Xiao, D. Y.; Geibel, M. A. L.; Ritter, T. *J. Am. Chem. Soc.* **2010**, 132 (41), 14530.
- (11) Ryabov, A. D. *Inorg. Chem.* **1987**, 26, 1252.
- (12) Laurence, C.; Legros, J.; Nicolet, P.; Vuluga, D.; Chantzis, A.; Jacquemin, D. *J Phys Chem B* **2014**, 118 (27), 7594.
- (13) Bakhmutov, V. I.; Berry, J. F.; Cotton, F. A.; Ibragimov, S. *Dalton Trans.* **2005**, 1989-1992.
- (14) Powers, D. C.; Geibel, M. A. L.; Klein, J. E. M. N.; Ritter, T. *J. Am. Chem. Soc.* **2009**, 131 (47), 17050.
- (15) Powers, D. C.; Benitez, D.; Tkatchouk, E.; Goddard, W. A., III; Ritter, T. *J. Am. Chem. Soc.* **2010**, 132 (40), 14092.
- (16) Cai, G.; Fu, Y.; Li, Y.; Wan, X.; Shi, Z. *J. Am. Chem. Soc.* **2007**, 129 (24), 7666.
- (17) Pregosin, P.G.; Kumar, A. Fernandez, I. *Chem. Rev.* **2005**, 105, 2977–2998
